# Supplementary material for: The asymmetric distribution of RNA polymerase II and nucleosomes on replicated daughter genomes is caused by differences in replication timing between the lagging and the leading strand
Source: HighWire-hosted journal article supplement (doi:10.1101/gr.275387.121), 2022-01-18
Supplement: Supplemental_Table_S1.xlsx [file Supplemental_Table_S1.xlsx]

## Sheet: Table_S1_Replication_Origins
Supplemental Tabel S1: Replication Origins. Replication origins identified in Fig1B and Fig 2 (new ARS). Start(bp) and end (bp) are the start and end coordinates of the new ARS. start (bp) of closest annotated ARS, Nieduszynski et al. (2007) is the start coordinate of the ARS from Nieduszynski et al. (2007) that is closest to the new ARS.
new ARS	replication timing (min) Vasseur et al. (2016), W strand	start (bp) of closest annotated ARS, Nieduszynski et al. (2007)	Chr	avg NChAP read density (normalized to maximum count per chromosome)	start (bp) of mapped ARS	end (bp) of mapped ARS
ARS102.0	ND	650	1	ND
ARS102.5.0	59.5893	6136	1	0.0202276	6645	7045
ARS103.0	ND	7998	1	ND
ARS104.0	42.3626	30946	1	0.44483	21293	21693
ARS104.1	42.3626	30946	1	0.44483	22635	23035
ARS104.2	42.3626	30946	1	0.44483	27268	27668
ARS104.3	42.3626	30946	1	0.44483	27826	28226
ARS104.4	42.3626	30946	1	0.44483	28711	29111
ARS104.5	42.3626	30946	1	0.44483	30401	30801
ARS104.6	42.3626	30946	1	0.44483	31702	32102
ARS104.7	42.3626	30946	1	0.44483	32142	32313
ARS104.8	42.3626	30946	1	0.44483	32441	32542
ARS104.9	42.3626	30946	1	0.44483	32619	32841
ARS104.10	42.3626	30946	1	0.44483	33477	33877
ARS104.11	42.3626	30946	1	0.44483	33993	34038
ARS104.12	42.3626	30946	1	0.44483	34593	34993
ARS104.13	42.3626	30946	1	0.44483	35319	35719
ARS104.14	42.3626	30946	1	0.44483	35734	35739
ARS105.0	35.2609	40716	1	0.400005	36548	36948
ARS105.1	35.2609	40716	1	0.400005	37621	38021
ARS105.2	35.2609	40716	1	0.400005	38338	38738
ARS105.3	35.2609	40716	1	0.400005	39475	39875
ARS105.4	35.2609	40716	1	0.400005	40589	40989
ARS105.5	35.2609	40716	1	0.400005	41046	41446
ARS105.6	35.2609	40716	1	0.400005	42329	42729
ARS105.7	35.2609	40716	1	0.400005	43013	43413
ARS105.8	35.2609	40716	1	0.400005	43916	44316
ARS105.9	35.2609	40716	1	0.400005	44343	44743
ARS105.10	35.2609	40716	1	0.400005	44747	45147
ARS105.11	35.2609	40716	1	0.400005	45911	46311
ARS105.12	35.2609	40716	1	0.400005	46462	46465
ARS105.13	35.2609	40716	1	0.400005	47194	47594
ARS105.14	35.2609	40716	1	0.400005	47966	48366
ARS105.15	35.2609	40716	1	0.400005	48463	48863
ARS105.16	35.2609	40716	1	0.400005	48945	49345
ARS105.17	35.2609	40716	1	0.400005	49647	50047
ARS105.18	35.2609	40716	1	0.400005	51152	51552
ARS105.19	35.2609	40716	1	0.400005	52022	52422
ARS105.20	35.2609	40716	1	0.400005	53013	53413
ARS105.21	35.2609	40716	1	0.400005	53506	53906
ARS105.22	35.2609	40716	1	0.400005	54194	54594
ARS105.23	35.2609	40716	1	0.400005	54968	55368
ARS106.0	30.0666	70258	1	0.340647	56722	57122
ARS106.1	30.0666	70258	1	0.340647	57636	58036
ARS106.2	30.0666	70258	1	0.340647	58297	58697
ARS106.3	30.0666	70258	1	0.340647	58749	59149
ARS106.4	30.0666	70258	1	0.340647	59597	59997
ARS106.5	30.0666	70258	1	0.340647	60329	60729
ARS106.6	30.0666	70258	1	0.340647	60798	61198
ARS106.7	30.0666	70258	1	0.340647	61264	61664
ARS106.8	30.0666	70258	1	0.340647	61712	61969
ARS106.9	30.0666	70258	1	0.340647	62093	62112
ARS106.10	30.0666	70258	1	0.340647	62394	62493
ARS106.11	30.0666	70258	1	0.340647	62881	63281
ARS106.12	30.0666	70258	1	0.340647	63479	63489
ARS106.13	30.0666	70258	1	0.340647	64409	64809
ARS106.14	30.0666	70258	1	0.340647	65939	66339
ARS106.15	30.0666	70258	1	0.340647	66785	67185
ARS106.16	30.0666	70258	1	0.340647	67330	67730
ARS106.17	30.0666	70258	1	0.340647	68910	69310
ARS106.18	30.0666	70258	1	0.340647	70182	70582
ARS106.19	30.0666	70258	1	0.340647	71985	72385
ARS106.20	30.0666	70258	1	0.340647	72712	73112
ARS106.21	30.0666	70258	1	0.340647	73977	74377
ARS106.22	30.0666	70258	1	0.340647	74618	74680
ARS106.23	30.0666	70258	1	0.340647	75046	75446
ARS106.24	30.0666	70258	1	0.340647	75762	76162
ARS106.25	30.0666	70258	1	0.340647	76447	76847
ARS106.26	30.0666	70258	1	0.340647	77359	77759
ARS106.27	30.0666	70258	1	0.340647	78218	78618
ARS106.28	30.0666	70258	1	0.340647	78708	78906
ARS106.29	30.0666	70258	1	0.340647	79680	80080
ARS106.30	30.0666	70258	1	0.340647	80434	80834
ARS106.31	30.0666	70258	1	0.340647	81084	81484
ARS106.32	30.0666	70258	1	0.340647	82080	82480
ARS106.33	30.0666	70258	1	0.340647	82826	83226
ARS106.34	30.0666	70258	1	0.340647	83500	83900
ARS106.35	30.0666	70258	1	0.340647	85116	85516
ARS106.36	30.0666	70258	1	0.340647	86162	86562
ARS106.37	30.0666	70258	1	0.340647	86633	87033
ARS106.38	30.0666	70258	1	0.340647	87262	87662
ARS106.39	30.0666	70258	1	0.340647	88121	88521
ARS106.40	30.0666	70258	1	0.340647	88897	89297
ARS106.41	30.0666	70258	1	0.340647	89966	90366
ARS106.42	30.0666	70258	1	0.340647	91230	91630
ARS106.43	30.0666	70258	1	0.340647	91691	92091
ARS106.44	30.0666	70258	1	0.340647	92937	93337
ARS106.45	30.0666	70258	1	0.340647	93657	94057
ARS106.46	30.0666	70258	1	0.340647	94565	94965
ARS106.47	30.0666	70258	1	0.340647	95273	95673
ARS106.48	30.0666	70258	1	0.340647	96151	96551
ARS106.49	30.0666	70258	1	0.340647	96774	97174
ARS107.0	26.1523	124350	1	0.347017	97549	97949
ARS107.1	26.1523	124350	1	0.347017	99036	99436
ARS107.2	26.1523	124350	1	0.347017	100117	100517
ARS107.3	26.1523	124350	1	0.347017	100913	101313
ARS107.4	26.1523	124350	1	0.347017	101879	102279
ARS107.5	26.1523	124350	1	0.347017	102796	103196
ARS107.6	26.1523	124350	1	0.347017	103469	103869
ARS107.7	26.1523	124350	1	0.347017	104407	104807
ARS107.8	26.1523	124350	1	0.347017	105128	105528
ARS107.9	26.1523	124350	1	0.347017	105697	106097
ARS107.10	26.1523	124350	1	0.347017	106460	106860
ARS107.11	26.1523	124350	1	0.347017	107434	107834
ARS107.12	26.1523	124350	1	0.347017	107926	108103
ARS107.13	26.1523	124350	1	0.347017	108549	108949
ARS107.14	26.1523	124350	1	0.347017	109038	109438
ARS107.15	26.1523	124350	1	0.347017	109686	110086
ARS107.16	26.1523	124350	1	0.347017	110912	111312
ARS107.17	26.1523	124350	1	0.347017	111813	112213
ARS107.18	26.1523	124350	1	0.347017	112304	112704
ARS107.19	26.1523	124350	1	0.347017	112942	113049
ARS107.20	26.1523	124350	1	0.347017	113559	113959
ARS107.21	26.1523	124350	1	0.347017	114949	115349
ARS107.22	26.1523	124350	1	0.347017	115601	116001
ARS107.23	26.1523	124350	1	0.347017	116219	116619
ARS107.24	26.1523	124350	1	0.347017	117551	117951
ARS107.25	26.1523	124350	1	0.347017	118645	119045
ARS107.26	26.1523	124350	1	0.347017	119375	119775
ARS107.27	26.1523	124350	1	0.347017	120191	120591
ARS107.28	26.1523	124350	1	0.347017	121109	121509
ARS107.29	26.1523	124350	1	0.347017	121880	122280
ARS107.30	26.1523	124350	1	0.347017	122993	123393
ARS107.31	26.1523	124350	1	0.347017	123805	124205
ARS107.32	26.1523	124350	1	0.347017	124515	124915
ARS107.33	26.1523	124350	1	0.347017	125453	125853
ARS107.34	26.1523	124350	1	0.347017	125980	126380
ARS107.35	26.1523	124350	1	0.347017	126571	126971
ARS107.36	26.1523	124350	1	0.347017	127246	127646
ARS107.37	26.1523	124350	1	0.347017	127685	128085
ARS107.38	26.1523	124350	1	0.347017	128397	128797
ARS107.39	26.1523	124350	1	0.347017	129223	129623
ARS107.40	26.1523	124350	1	0.347017	129863	130263
ARS107.41	26.1523	124350	1	0.347017	130322	130428
ARS107.5.0	39.1705	136900	1	0.469357	131005	131405
ARS107.5.1	39.1705	136900	1	0.469357	131489	131567
ARS107.5.2	39.1705	136900	1	0.469357	131688	131707
ARS107.5.3	39.1705	136900	1	0.469357	132172	132572
ARS107.5.4	39.1705	136900	1	0.469357	133293	133693
ARS107.5.5	39.1705	136900	1	0.469357	133861	134261
ARS107.5.6	39.1705	136900	1	0.469357	134789	135189
ARS107.5.7	39.1705	136900	1	0.469357	135271	135671
ARS107.5.8	39.1705	136900	1	0.469357	135799	136199
ARS107.5.9	39.1705	136900	1	0.469357	136814	137214
ARS107.5.10	39.1705	136900	1	0.469357	137773	138173
ARS107.5.11	39.1705	136900	1	0.469357	139476	139876
ARS107.5.12	39.1705	136900	1	0.469357	141256	141656
ARS108.0	31.4497	146703	1	0.420801	142664	143064
ARS108.1	31.4497	146703	1	0.420801	143766	144166
ARS108.2	31.4497	146703	1	0.420801	144947	145347
ARS108.3	31.4497	146703	1	0.420801	145873	146273
ARS108.4	31.4497	146703	1	0.420801	146612	147012
ARS108.5	31.4497	146703	1	0.420801	147745	148145
ARS108.6	31.4497	146703	1	0.420801	148828	149228
ARS108.7	31.4497	146703	1	0.420801	149354	149754
ARS108.8	31.4497	146703	1	0.420801	150093	150493
ARS108.9	31.4497	146703	1	0.420801	150666	151066
ARS108.10	31.4497	146703	1	0.420801	151695	152095
ARS108.11	31.4497	146703	1	0.420801	152217	152617
ARS108.12	31.4497	146703	1	0.420801	152870	152924
ARS108.13	31.4497	146703	1	0.420801	153280	153680
ARS109.0	37.4754	159906	1	0.329035	154085	154485
ARS109.1	37.4754	159906	1	0.329035	155008	155408
ARS109.2	37.4754	159906	1	0.329035	156023	156423
ARS109.3	37.4754	159906	1	0.329035	156737	157137
ARS109.4	37.4754	159906	1	0.329035	157204	157604
ARS109.5	37.4754	159906	1	0.329035	157752	157971
ARS109.6	37.4754	159906	1	0.329035	158076	158152
ARS109.7	37.4754	159906	1	0.329035	158410	158476
ARS109.8	37.4754	159906	1	0.329035	158606	158810
ARS109.9	37.4754	159906	1	0.329035	158931	159006
ARS109.10	37.4754	159906	1	0.329035	159453	159853
ARS109.11	37.4754	159906	1	0.329035	166252	166652
ARS109.12	37.4754	159906	1	0.329035	166727	167127
ARS109.13	37.4754	159906	1	0.329035	167742	168142
ARS110.0	29.7184	176154	1	0.39628	168412	168812
ARS110.1	29.7184	176154	1	0.39628	168900	169300
ARS110.2	29.7184	176154	1	0.39628	169825	170225
ARS110.3	29.7184	176154	1	0.39628	170794	171194
ARS110.4	29.7184	176154	1	0.39628	172175	172575
ARS110.5	29.7184	176154	1	0.39628	172781	173181
ARS110.6	29.7184	176154	1	0.39628	173321	173721
ARS110.7	29.7184	176154	1	0.39628	174228	174628
ARS110.8	29.7184	176154	1	0.39628	174939	175339
ARS110.9	29.7184	176154	1	0.39628	176293	176693
ARS110.10	29.7184	176154	1	0.39628	176868	177020
ARS110.11	29.7184	176154	1	0.39628	177073	177268
ARS110.12	29.7184	176154	1	0.39628	177512	177912
ARS110.13	29.7184	176154	1	0.39628	178080	178480
ARS110.14	29.7184	176154	1	0.39628	178536	178936
ARS110.15	29.7184	176154	1	0.39628	179293	179693
ARS110.16	29.7184	176154	1	0.39628	180335	180735
ARS110.17	29.7184	176154	1	0.39628	181735	182135
ARS110.18	29.7184	176154	1	0.39628	183048	183448
ARS110.19	29.7184	176154	1	0.39628	184266	184666
ARS110.20	29.7184	176154	1	0.39628	184816	185216
ARS110.21	29.7184	176154	1	0.39628	185872	186272
ARS110.22	29.7184	176154	1	0.39628	186905	187305
ARS110.23	29.7184	176154	1	0.39628	187972	188372
ARS110.24	29.7184	176154	1	0.39628	188831	189231
ARS110.25	29.7184	176154	1	0.39628	190406	190806
ARS110.26	29.7184	176154	1	0.39628	191179	191579
ARS110.27	29.7184	176154	1	0.39628	191819	192219
ARS110.28	29.7184	176154	1	0.39628	192696	193096
ARS110.29	29.7184	176154	1	0.39628	193160	193277
ARS110.30	29.7184	176154	1	0.39628	193388	193560
ARS110.31	29.7184	176154	1	0.39628	194026	194426
ARS110.32	29.7184	176154	1	0.39628	194724	195124
ARS110.33	29.7184	176154	1	0.39628	195296	195696
ARS110.5.0	ND	189813	1	ND
ARS111.0	14.6081	214879	1	0.247845	195709	196109
ARS111.1	14.6081	214879	1	0.247845	196146	196546
ARS111.2	14.6081	214879	1	0.247845	197038	197438
ARS111.3	14.6081	214879	1	0.247845	197684	198084
ARS111.4	14.6081	214879	1	0.247845	198134	198534
ARS111.5	14.6081	214879	1	0.247845	199093	199493
ARS111.6	14.6081	214879	1	0.247845	199537	199937
ARS111.7	14.6081	214879	1	0.247845	200246	200646
ARS111.8	14.6081	214879	1	0.247845	201190	201590
ARS111.9	14.6081	214879	1	0.247845	201700	202100
ARS111.10	14.6081	214879	1	0.247845	202691	203091
ARS111.11	14.6081	214879	1	0.247845	204110	204510
ARS111.12	14.6081	214879	1	0.247845	206562	206962
ARS111.13	14.6081	214879	1	0.247845	207227	207627
ARS111.14	14.6081	214879	1	0.247845	210339	210739
ARS111.15	14.6081	214879	1	0.247845	214879	215279
ARS112.0	ND	222871	1	ND
ARS113.0	0	226100	1	0.396552	227176	227576
ARS113.1	0	226100	1	0.396552	228457	228857
ARS200.0	0	39	2	0.207596	39	439
ARS201.0	42.412	6123	2	0.277766	5851	6251
ARS201.1	42.412	6123	2	0.277766	8403	8803
ARS201.2	42.412	6123	2	0.277766	9264	9664
ARS201.3	42.412	6123	2	0.277766	9920	9978
ARS201.4	42.412	6123	2	0.277766	10103	10320
ARS201.5	42.412	6123	2	0.277766	10880	11280
ARS201.6	42.412	6123	2	0.277766	11420	11820
ARS201.7	42.412	6123	2	0.277766	12222	12622
ARS201.8	42.412	6123	2	0.277766	12726	12743
ARS201.9	42.412	6123	2	0.277766	13405	13805
ARS201.10	42.412	6123	2	0.277766	14275	14675
ARS201.11	42.412	6123	2	0.277766	15273	15673
ARS201.12	42.412	6123	2	0.277766	15868	16268
ARS201.13	42.412	6123	2	0.277766	17144	17544
ARS201.5.0	29.3067	28933	2	0.332076	17830	18230
ARS201.5.1	29.3067	28933	2	0.332076	18811	19211
ARS201.5.2	29.3067	28933	2	0.332076	20638	21038
ARS201.5.3	29.3067	28933	2	0.332076	22188	22588
ARS201.5.4	29.3067	28933	2	0.332076	23029	23429
ARS201.5.5	29.3067	28933	2	0.332076	23673	23748
ARS201.5.6	29.3067	28933	2	0.332076	24123	24523
ARS201.5.7	29.3067	28933	2	0.332076	25415	25815
ARS201.5.8	29.3067	28933	2	0.332076	26641	27041
ARS201.5.9	29.3067	28933	2	0.332076	27503	27903
ARS201.5.10	29.3067	28933	2	0.332076	27931	28331
ARS201.5.11	29.3067	28933	2	0.332076	29047	29447
ARS201.7.0	34.1427	38623	2	0.350408	36462	36862
ARS201.7.1	34.1427	38623	2	0.350408	36876	37276
ARS201.7.2	34.1427	38623	2	0.350408	37422	37587
ARS201.7.3	34.1427	38623	2	0.350408	38144	38544
ARS201.7.4	34.1427	38623	2	0.350408	39115	39515
ARS201.7.5	34.1427	38623	2	0.350408	39705	40105
ARS201.7.6	34.1427	38623	2	0.350408	41039	41439
ARS201.7.7	34.1427	38623	2	0.350408	41477	41641
ARS201.7.8	34.1427	38623	2	0.350408	41841	41877
ARS201.7.9	34.1427	38623	2	0.350408	42469	42869
ARS201.7.10	34.1427	38623	2	0.350408	43371	43771
ARS201.7.11	34.1427	38623	2	0.350408	44458	44858
ARS201.7.12	34.1427	38623	2	0.350408	45278	45678
ARS201.7.13	34.1427	38623	2	0.350408	46128	46528
ARS201.7.14	34.1427	38623	2	0.350408	46721	47121
ARS201.7.15	34.1427	38623	2	0.350408	47328	47472
ARS201.7.16	34.1427	38623	2	0.350408	47623	47728
ARS201.7.17	34.1427	38623	2	0.350408	48190	48590
ARS201.7.18	34.1427	38623	2	0.350408	49083	49483
ARS201.7.19	34.1427	38623	2	0.350408	49533	49933
ARS201.7.20	34.1427	38623	2	0.350408	49937	50337
ARS202.0	27.1675	63186	2	0.327966	51474	51874
ARS202.1	27.1675	63186	2	0.327966	51999	52399
ARS202.2	27.1675	63186	2	0.327966	52428	52828
ARS202.3	27.1675	63186	2	0.327966	52990	53390
ARS202.4	27.1675	63186	2	0.327966	53902	54302
ARS202.5	27.1675	63186	2	0.327966	54388	54788
ARS202.6	27.1675	63186	2	0.327966	55529	55929
ARS202.7	27.1675	63186	2	0.327966	56133	56533
ARS202.8	27.1675	63186	2	0.327966	56847	57247
ARS202.9	27.1675	63186	2	0.327966	58000	58400
ARS202.10	27.1675	63186	2	0.327966	58407	58807
ARS202.11	27.1675	63186	2	0.327966	59126	59526
ARS202.12	27.1675	63186	2	0.327966	59832	60232
ARS202.13	27.1675	63186	2	0.327966	60315	60445
ARS202.14	27.1675	63186	2	0.327966	60845	61245
ARS202.15	27.1675	63186	2	0.327966	61385	61785
ARS202.16	27.1675	63186	2	0.327966	61800	61935
ARS202.17	27.1675	63186	2	0.327966	62392	62792
ARS202.18	27.1675	63186	2	0.327966	62834	63234
ARS202.19	27.1675	63186	2	0.327966	63439	63839
ARS202.20	27.1675	63186	2	0.327966	63972	64372
ARS202.21	27.1675	63186	2	0.327966	64812	65212
ARS202.22	27.1675	63186	2	0.327966	65390	65790
ARS202.23	27.1675	63186	2	0.327966	66042	66442
ARS202.24	27.1675	63186	2	0.327966	66571	66667
ARS202.25	27.1675	63186	2	0.327966	67310	67710
ARS202.26	27.1675	63186	2	0.327966	69255	69655
ARS202.27	27.1675	63186	2	0.327966	69777	70177
ARS202.28	27.1675	63186	2	0.327966	70386	70388
ARS202.29	27.1675	63186	2	0.327966	70515	70786
ARS202.30	27.1675	63186	2	0.327966	71542	71942
ARS202.31	27.1675	63186	2	0.327966	72043	72443
ARS202.32	27.1675	63186	2	0.327966	72608	73008
ARS202.33	27.1675	63186	2	0.327966	73487	73887
ARS202.34	27.1675	63186	2	0.327966	74454	74854
ARS202.35	27.1675	63186	2	0.327966	75327	75727
ARS202.36	27.1675	63186	2	0.327966	75819	75859
ARS202.37	27.1675	63186	2	0.327966	76370	76770
ARS202.38	27.1675	63186	2	0.327966	76830	77230
ARS202.39	27.1675	63186	2	0.327966	77733	78133
ARS203.0	38.1435	93410	2	0.26647	78593	78993
ARS203.1	38.1435	93410	2	0.26647	80414	80814
ARS203.2	38.1435	93410	2	0.26647	81111	81511
ARS203.3	38.1435	93410	2	0.26647	81762	82162
ARS203.4	38.1435	93410	2	0.26647	82394	82794
ARS203.5	38.1435	93410	2	0.26647	83152	83552
ARS203.6	38.1435	93410	2	0.26647	83997	84397
ARS203.7	38.1435	93410	2	0.26647	84501	84901
ARS203.8	38.1435	93410	2	0.26647	85185	85585
ARS203.9	38.1435	93410	2	0.26647	85711	86111
ARS203.10	38.1435	93410	2	0.26647	86248	86648
ARS203.11	38.1435	93410	2	0.26647	86676	87076
ARS203.12	38.1435	93410	2	0.26647	87686	88086
ARS203.13	38.1435	93410	2	0.26647	89543	89943
ARS203.14	38.1435	93410	2	0.26647	90099	90316
ARS203.15	38.1435	93410	2	0.26647	90655	91055
ARS203.16	38.1435	93410	2	0.26647	91156	91368
ARS203.17	38.1435	93410	2	0.26647	91899	92299
ARS203.18	38.1435	93410	2	0.26647	92545	92945
ARS203.19	38.1435	93410	2	0.26647	92956	93356
ARS203.20	38.1435	93410	2	0.26647	93796	94196
ARS203.21	38.1435	93410	2	0.26647	94929	95329
ARS203.22	38.1435	93410	2	0.26647	95618	96018
ARS203.23	38.1435	93410	2	0.26647	96679	97079
ARS203.24	38.1435	93410	2	0.26647	97733	98133
ARS203.25	38.1435	93410	2	0.26647	98505	98905
ARS203.26	38.1435	93410	2	0.26647	99033	99433
ARS203.27	38.1435	93410	2	0.26647	99841	100241
ARS203.28	38.1435	93410	2	0.26647	100405	100805
ARS203.29	38.1435	93410	2	0.26647	101977	102377
ARS203.30	38.1435	93410	2	0.26647	102779	103179
ARS203.31	38.1435	93410	2	0.26647	103821	104221
ARS203.32	38.1435	93410	2	0.26647	104695	105095
ARS203.33	38.1435	93410	2	0.26647	105333	105733
ARS203.34	38.1435	93410	2	0.26647	106072	106121
ARS203.35	38.1435	93410	2	0.26647	107002	107402
ARS203.36	38.1435	93410	2	0.26647	107608	108008
ARS203.37	38.1435	93410	2	0.26647	108332	108732
ARS203.38	38.1435	93410	2	0.26647	109058	109458
ARS203.39	38.1435	93410	2	0.26647	109677	109768
ARS203.40	38.1435	93410	2	0.26647	110986	111386
ARS203.41	38.1435	93410	2	0.26647	111506	111906
ARS203.42	38.1435	93410	2	0.26647	112298	112698
ARS203.43	38.1435	93410	2	0.26647	112954	113354
ARS203.44	38.1435	93410	2	0.26647	114041	114441
ARS203.45	38.1435	93410	2	0.26647	114670	114802
ARS203.46	38.1435	93410	2	0.26647	114934	115070
ARS203.47	38.1435	93410	2	0.26647	115533	115933
ARS203.48	38.1435	93410	2	0.26647	116309	116709
ARS203.49	38.1435	93410	2	0.26647	117521	117921
ARS203.50	38.1435	93410	2	0.26647	118160	118560
ARS206.0	38.2054	142868	2	0.255986	118846	119246
ARS206.1	38.2054	142868	2	0.255986	119550	119950
ARS206.2	38.2054	142868	2	0.255986	120549	120949
ARS206.3	38.2054	142868	2	0.255986	121666	122066
ARS206.4	38.2054	142868	2	0.255986	122926	123326
ARS206.5	38.2054	142868	2	0.255986	123814	124214
ARS206.6	38.2054	142868	2	0.255986	124691	125091
ARS206.7	38.2054	142868	2	0.255986	125771	126171
ARS206.8	38.2054	142868	2	0.255986	127006	127406
ARS206.9	38.2054	142868	2	0.255986	127991	128391
ARS206.10	38.2054	142868	2	0.255986	128949	129349
ARS206.11	38.2054	142868	2	0.255986	130218	130618
ARS206.12	38.2054	142868	2	0.255986	130911	131311
ARS206.13	38.2054	142868	2	0.255986	131552	131614
ARS206.14	38.2054	142868	2	0.255986	132364	132764
ARS206.15	38.2054	142868	2	0.255986	133162	133562
ARS206.16	38.2054	142868	2	0.255986	134182	134582
ARS206.17	38.2054	142868	2	0.255986	134599	134999
ARS206.18	38.2054	142868	2	0.255986	135118	135518
ARS206.19	38.2054	142868	2	0.255986	136124	136524
ARS206.20	38.2054	142868	2	0.255986	136949	137349
ARS206.21	38.2054	142868	2	0.255986	137800	138200
ARS206.22	38.2054	142868	2	0.255986	138780	139180
ARS206.23	38.2054	142868	2	0.255986	139402	139561
ARS206.24	38.2054	142868	2	0.255986	139818	140218
ARS206.25	38.2054	142868	2	0.255986	140610	141010
ARS206.26	38.2054	142868	2	0.255986	141306	141706
ARS206.27	38.2054	142868	2	0.255986	142251	142651
ARS206.28	38.2054	142868	2	0.255986	144003	144403
ARS206.29	38.2054	142868	2	0.255986	144421	144439
ARS206.30	38.2054	142868	2	0.255986	144494	144821
ARS206.31	38.2054	142868	2	0.255986	144954	145354
ARS206.32	38.2054	142868	2	0.255986	145891	146291
ARS206.33	38.2054	142868	2	0.255986	146367	146767
ARS206.34	38.2054	142868	2	0.255986	147192	147592
ARS206.35	38.2054	142868	2	0.255986	147858	147894
ARS206.36	38.2054	142868	2	0.255986	148302	148702
ARS206.37	38.2054	142868	2	0.255986	149199	149599
ARS206.38	38.2054	142868	2	0.255986	149912	150312
ARS206.39	38.2054	142868	2	0.255986	150358	150480
ARS206.40	38.2054	142868	2	0.255986	151389	151789
ARS206.41	38.2054	142868	2	0.255986	152048	152448
ARS206.42	38.2054	142868	2	0.255986	153394	153794
ARS206.43	38.2054	142868	2	0.255986	154209	154609
ARS206.44	38.2054	142868	2	0.255986	155929	156329
ARS207.0	36.4675	170049	2	0.333759	157013	157413
ARS207.1	36.4675	170049	2	0.333759	157813	158213
ARS207.2	36.4675	170049	2	0.333759	158921	159321
ARS207.3	36.4675	170049	2	0.333759	159373	159773
ARS207.4	36.4675	170049	2	0.333759	160104	160504
ARS207.5	36.4675	170049	2	0.333759	161132	161532
ARS207.6	36.4675	170049	2	0.333759	162410	162810
ARS207.7	36.4675	170049	2	0.333759	163264	163664
ARS207.8	36.4675	170049	2	0.333759	164137	164537
ARS207.9	36.4675	170049	2	0.333759	164734	164819
ARS207.10	36.4675	170049	2	0.333759	165018	165134
ARS207.11	36.4675	170049	2	0.333759	166404	166804
ARS207.12	36.4675	170049	2	0.333759	167064	167464
ARS207.13	36.4675	170049	2	0.333759	167684	168084
ARS207.14	36.4675	170049	2	0.333759	168137	168537
ARS207.15	36.4675	170049	2	0.333759	168691	169091
ARS207.16	36.4675	170049	2	0.333759	169659	170059
ARS207.17	36.4675	170049	2	0.333759	171034	171434
ARS207.18	36.4675	170049	2	0.333759	171489	171889
ARS207.19	36.4675	170049	2	0.333759	172026	172426
ARS207.20	36.4675	170049	2	0.333759	173036	173436
ARS207.21	36.4675	170049	2	0.333759	173682	174082
ARS207.1.0	39.4364	177529	2	0.369759	174055	174455
ARS207.1.1	39.4364	177529	2	0.369759	174987	175387
ARS207.1.2	39.4364	177529	2	0.369759	175483	175883
ARS207.1.3	39.4364	177529	2	0.369759	176074	176085
ARS207.1.4	39.4364	177529	2	0.369759	176913	177313
ARS207.1.5	39.4364	177529	2	0.369759	178058	178458
ARS207.1.6	39.4364	177529	2	0.369759	178828	179228
ARS207.1.7	39.4364	177529	2	0.369759	179806	180206
ARS207.1.8	39.4364	177529	2	0.369759	180949	181349
ARS207.1.9	39.4364	177529	2	0.369759	181860	182260
ARS207.1.10	39.4364	177529	2	0.369759	182574	182974
ARS207.1.11	39.4364	177529	2	0.369759	183167	183567
ARS207.1.12	39.4364	177529	2	0.369759	184415	184815
ARS207.1.13	39.4364	177529	2	0.369759	184927	185327
ARS207.1.14	39.4364	177529	2	0.369759	185653	186053
ARS207.1.15	39.4364	177529	2	0.369759	186194	186594
ARS207.1.16	39.4364	177529	2	0.369759	186997	187397
ARS207.5.0	32.0896	198193	2	0.551098	188165	188565
ARS207.5.1	32.0896	198193	2	0.551098	189021	189421
ARS207.5.2	32.0896	198193	2	0.551098	190021	190421
ARS207.5.3	32.0896	198193	2	0.551098	191072	191472
ARS207.5.4	32.0896	198193	2	0.551098	192412	192812
ARS207.5.5	32.0896	198193	2	0.551098	193075	193475
ARS207.5.6	32.0896	198193	2	0.551098	193655	194055
ARS207.5.7	32.0896	198193	2	0.551098	194157	194198
ARS207.5.8	32.0896	198193	2	0.551098	194686	195086
ARS207.5.9	32.0896	198193	2	0.551098	195301	195701
ARS207.5.10	32.0896	198193	2	0.551098	196386	196786
ARS207.5.11	32.0896	198193	2	0.551098	198425	198825
ARS207.5.12	32.0896	198193	2	0.551098	199520	199920
ARS207.5.13	32.0896	198193	2	0.551098	200194	200594
ARS207.5.14	32.0896	198193	2	0.551098	200929	201329
ARS207.5.15	32.0896	198193	2	0.551098	201559	201676
ARS207.5.16	32.0896	198193	2	0.551098	202487	202887
ARS207.5.17	32.0896	198193	2	0.551098	203050	203450
ARS207.5.18	32.0896	198193	2	0.551098	203484	203884
ARS207.8.0	36.1818	209187	2	0.322862	203977	204377
ARS207.8.1	36.1818	209187	2	0.322862	204428	204575
ARS207.8.2	36.1818	209187	2	0.322862	204638	204828
ARS207.8.3	36.1818	209187	2	0.322862	204872	205038
ARS207.8.4	36.1818	209187	2	0.322862	205385	205785
ARS207.8.5	36.1818	209187	2	0.322862	206106	206506
ARS207.8.6	36.1818	209187	2	0.322862	206714	207114
ARS207.8.7	36.1818	209187	2	0.322862	207197	207501
ARS207.8.8	36.1818	209187	2	0.322862	207751	208151
ARS207.8.9	36.1818	209187	2	0.322862	208284	208476
ARS207.8.10	36.1818	209187	2	0.322862	208782	209182
ARS207.8.11	36.1818	209187	2	0.322862	209726	210126
ARS207.8.12	36.1818	209187	2	0.322862	210541	210941
ARS207.8.13	36.1818	209187	2	0.322862	211294	211694
ARS207.8.14	36.1818	209187	2	0.322862	211710	212110
ARS207.8.15	36.1818	209187	2	0.322862	212166	212566
ARS207.8.16	36.1818	209187	2	0.322862	212612	213012
ARS207.8.17	36.1818	209187	2	0.322862	213142	213331
ARS207.8.18	36.1818	209187	2	0.322862	213728	214128
ARS207.8.19	36.1818	209187	2	0.322862	214310	214371
ARS207.8.20	36.1818	209187	2	0.322862	214737	215137
ARS207.8.21	36.1818	209187	2	0.322862	215649	216049
ARS207.8.22	36.1818	209187	2	0.322862	216118	216518
ARS207.8.23	36.1818	209187	2	0.322862	216666	217066
ARS207.8.24	36.1818	209187	2	0.322862	217106	217506
ARS207.8.25	36.1818	209187	2	0.322862	217817	217859
ARS207.8.26	36.1818	209187	2	0.322862	218885	219285
ARS207.8.27	36.1818	209187	2	0.322862	219293	219693
ARS207.8.28	36.1818	209187	2	0.322862	220022	220422
ARS207.8.29	36.1818	209187	2	0.322862	220577	220977
ARS208.0	29.1268	237644	2	0.332136	227154	227554
ARS208.1	29.1268	237644	2	0.332136	228228	228628
ARS208.2	29.1268	237644	2	0.332136	229326	229726
ARS208.3	29.1268	237644	2	0.332136	230145	230545
ARS208.4	29.1268	237644	2	0.332136	230643	231043
ARS208.5	29.1268	237644	2	0.332136	231639	232039
ARS208.6	29.1268	237644	2	0.332136	232100	232500
ARS208.7	29.1268	237644	2	0.332136	232982	233382
ARS208.8	29.1268	237644	2	0.332136	233548	233948
ARS208.9	29.1268	237644	2	0.332136	234212	234346
ARS208.10	29.1268	237644	2	0.332136	234610	234612
ARS208.11	29.1268	237644	2	0.332136	234984	235010
ARS208.12	29.1268	237644	2	0.332136	235558	235958
ARS208.13	29.1268	237644	2	0.332136	236009	236409
ARS208.14	29.1268	237644	2	0.332136	236448	236848
ARS208.15	29.1268	237644	2	0.332136	237366	237766
ARS208.16	29.1268	237644	2	0.332136	238401	238801
ARS208.17	29.1268	237644	2	0.332136	238910	239310
ARS208.18	29.1268	237644	2	0.332136	239365	239400
ARS208.19	29.1268	237644	2	0.332136	239559	239765
ARS208.20	29.1268	237644	2	0.332136	240225	240625
ARS208.21	29.1268	237644	2	0.332136	240996	241396
ARS208.22	29.1268	237644	2	0.332136	241419	241430
ARS208.23	29.1268	237644	2	0.332136	241826	242226
ARS208.24	29.1268	237644	2	0.332136	242349	242749
ARS208.25	29.1268	237644	2	0.332136	243339	243739
ARS208.26	29.1268	237644	2	0.332136	243870	244111
ARS208.27	29.1268	237644	2	0.332136	244888	245288
ARS208.28	29.1268	237644	2	0.332136	245800	246200
ARS208.29	29.1268	237644	2	0.332136	246209	246456
ARS209.0	27.5657	254890	2	0.397673	247107	247507
ARS209.1	27.5657	254890	2	0.397673	247707	247823
ARS209.2	27.5657	254890	2	0.397673	247978	248107
ARS209.3	27.5657	254890	2	0.397673	248985	249385
ARS209.4	27.5657	254890	2	0.397673	249951	250351
ARS209.5	27.5657	254890	2	0.397673	250739	251139
ARS209.6	27.5657	254890	2	0.397673	251246	251424
ARS209.7	27.5657	254890	2	0.397673	252183	252583
ARS209.8	27.5657	254890	2	0.397673	252635	253035
ARS209.9	27.5657	254890	2	0.397673	253361	253761
ARS209.10	27.5657	254890	2	0.397673	254263	254663
ARS209.11	27.5657	254890	2	0.397673	254751	255151
ARS209.12	27.5657	254890	2	0.397673	256260	256660
ARS209.13	27.5657	254890	2	0.397673	257047	257447
ARS209.14	27.5657	254890	2	0.397673	257484	257884
ARS209.15	27.5657	254890	2	0.397673	258148	258548
ARS209.16	27.5657	254890	2	0.397673	259153	259553
ARS209.17	27.5657	254890	2	0.397673	265662	266062
ARS209.18	27.5657	254890	2	0.397673	266707	267107
ARS209.19	27.5657	254890	2	0.397673	268258	268658
ARS210.5.0	34.1638	283015	2	0.291368	269258	269658
ARS210.5.1	34.1638	283015	2	0.291368	269916	270316
ARS210.5.2	34.1638	283015	2	0.291368	270426	270645
ARS210.5.3	34.1638	283015	2	0.291368	270901	271301
ARS210.5.4	34.1638	283015	2	0.291368	271719	272119
ARS210.5.5	34.1638	283015	2	0.291368	272169	272569
ARS210.5.6	34.1638	283015	2	0.291368	272751	273151
ARS210.5.7	34.1638	283015	2	0.291368	273518	273918
ARS210.5.8	34.1638	283015	2	0.291368	274670	275070
ARS210.5.9	34.1638	283015	2	0.291368	275100	275500
ARS210.5.10	34.1638	283015	2	0.291368	275925	276325
ARS210.5.11	34.1638	283015	2	0.291368	276874	277274
ARS210.5.12	34.1638	283015	2	0.291368	278146	278546
ARS210.5.13	34.1638	283015	2	0.291368	279306	279706
ARS210.5.14	34.1638	283015	2	0.291368	279833	280233
ARS210.5.15	34.1638	283015	2	0.291368	280399	280612
ARS210.5.16	34.1638	283015	2	0.291368	281535	281935
ARS210.5.17	34.1638	283015	2	0.291368	282201	282601
ARS210.5.18	34.1638	283015	2	0.291368	283015	283415
ARS210.5.19	34.1638	283015	2	0.291368	284093	284493
ARS210.5.20	34.1638	283015	2	0.291368	284620	285020
ARS210.5.21	34.1638	283015	2	0.291368	285085	285485
ARS210.5.22	34.1638	283015	2	0.291368	285687	286087
ARS210.5.23	34.1638	283015	2	0.291368	286979	287379
ARS210.5.24	34.1638	283015	2	0.291368	287901	288301
ARS210.5.25	34.1638	283015	2	0.291368	289010	289410
ARS210.5.26	34.1638	283015	2	0.291368	289432	289832
ARS210.5.27	34.1638	283015	2	0.291368	289945	290345
ARS210.5.28	34.1638	283015	2	0.291368	291595	291995
ARS210.5.29	34.1638	283015	2	0.291368	292152	292552
ARS210.5.30	34.1638	283015	2	0.291368	293045	293445
ARS210.5.31	34.1638	283015	2	0.291368	293766	294166
ARS210.5.32	34.1638	283015	2	0.291368	294316	294716
ARS210.5.33	34.1638	283015	2	0.291368	295132	295532
ARS210.5.34	34.1638	283015	2	0.291368	295916	296316
ARS210.5.35	34.1638	283015	2	0.291368	296478	296878
ARS210.5.36	34.1638	283015	2	0.291368	297186	297586
ARS210.5.37	34.1638	283015	2	0.291368	297659	298059
ARS210.5.38	34.1638	283015	2	0.291368	298569	298969
ARS210.5.39	34.1638	283015	2	0.291368	298979	299379
ARS210.5.40	34.1638	283015	2	0.291368	299761	300161
ARS210.5.41	34.1638	283015	2	0.291368	301436	301836
ARS210.5.42	34.1638	283015	2	0.291368	301901	302301
ARS210.5.43	34.1638	283015	2	0.291368	302526	302926
ARS210.5.44	34.1638	283015	2	0.291368	303088	303214
ARS210.5.45	34.1638	283015	2	0.291368	304174	304574
ARS211.0	29.3392	326099	2	0.263966	305284	305684
ARS211.1	29.3392	326099	2	0.263966	305710	306110
ARS211.2	29.3392	326099	2	0.263966	306322	306722
ARS211.3	29.3392	326099	2	0.263966	306837	307237
ARS211.4	29.3392	326099	2	0.263966	308364	308764
ARS211.5	29.3392	326099	2	0.263966	309537	309937
ARS211.6	29.3392	326099	2	0.263966	310197	310597
ARS211.7	29.3392	326099	2	0.263966	310669	311069
ARS211.8	29.3392	326099	2	0.263966	311155	311555
ARS211.9	29.3392	326099	2	0.263966	312053	312453
ARS211.10	29.3392	326099	2	0.263966	312504	312904
ARS211.11	29.3392	326099	2	0.263966	313388	313788
ARS211.12	29.3392	326099	2	0.263966	314212	314612
ARS211.13	29.3392	326099	2	0.263966	314986	315386
ARS211.14	29.3392	326099	2	0.263966	315554	315954
ARS211.15	29.3392	326099	2	0.263966	316076	316476
ARS211.16	29.3392	326099	2	0.263966	317472	317872
ARS211.17	29.3392	326099	2	0.263966	318468	318868
ARS211.18	29.3392	326099	2	0.263966	319233	319633
ARS211.19	29.3392	326099	2	0.263966	319782	320182
ARS211.20	29.3392	326099	2	0.263966	320941	321341
ARS211.21	29.3392	326099	2	0.263966	321915	322315
ARS211.22	29.3392	326099	2	0.263966	322981	323381
ARS211.23	29.3392	326099	2	0.263966	323495	323895
ARS211.24	29.3392	326099	2	0.263966	324561	324961
ARS211.25	29.3392	326099	2	0.263966	325239	325639
ARS211.26	29.3392	326099	2	0.263966	326432	326832
ARS211.27	29.3392	326099	2	0.263966	327811	328211
ARS211.28	29.3392	326099	2	0.263966	328295	328695
ARS211.29	29.3392	326099	2	0.263966	329844	330244
ARS211.30	29.3392	326099	2	0.263966	330987	331387
ARS211.31	29.3392	326099	2	0.263966	332069	332469
ARS211.32	29.3392	326099	2	0.263966	332877	333277
ARS211.33	29.3392	326099	2	0.263966	333564	333964
ARS211.34	29.3392	326099	2	0.263966	334788	335188
ARS211.35	29.3392	326099	2	0.263966	335507	335907
ARS211.36	29.3392	326099	2	0.263966	336178	336578
ARS211.37	29.3392	326099	2	0.263966	336742	337142
ARS211.38	29.3392	326099	2	0.263966	337155	337555
ARS211.39	29.3392	326099	2	0.263966	338738	339138
ARS211.40	29.3392	326099	2	0.263966	339703	340103
ARS211.41	29.3392	326099	2	0.263966	340480	340487
ARS211.42	29.3392	326099	2	0.263966	340899	341299
ARS211.43	29.3392	326099	2	0.263966	341852	342252
ARS211.44	29.3392	326099	2	0.263966	343426	343826
ARS211.45	29.3392	326099	2	0.263966	343898	344298
ARS211.46	29.3392	326099	2	0.263966	344819	345219
ARS211.47	29.3392	326099	2	0.263966	346311	346711
ARS211.48	29.3392	326099	2	0.263966	347165	347565
ARS211.49	29.3392	326099	2	0.263966	347907	348307
ARS211.50	29.3392	326099	2	0.263966	348811	349211
ARS211.51	29.3392	326099	2	0.263966	349797	350197
ARS211.52	29.3392	326099	2	0.263966	351189	351589
ARS211.53	29.3392	326099	2	0.263966	352271	352671
ARS212.0	36.1164	378434	2	0.258158	352922	353322
ARS212.1	36.1164	378434	2	0.258158	354306	354706
ARS212.2	36.1164	378434	2	0.258158	355213	355613
ARS212.3	36.1164	378434	2	0.258158	355889	355957
ARS212.4	36.1164	378434	2	0.258158	356894	357294
ARS212.5	36.1164	378434	2	0.258158	357882	358282
ARS212.6	36.1164	378434	2	0.258158	358516	358916
ARS212.7	36.1164	378434	2	0.258158	359423	359823
ARS212.8	36.1164	378434	2	0.258158	360178	360578
ARS212.9	36.1164	378434	2	0.258158	360911	361311
ARS212.10	36.1164	378434	2	0.258158	362776	363176
ARS212.11	36.1164	378434	2	0.258158	363507	363907
ARS212.12	36.1164	378434	2	0.258158	364283	364683
ARS212.13	36.1164	378434	2	0.258158	365176	365576
ARS212.14	36.1164	378434	2	0.258158	366295	366695
ARS212.15	36.1164	378434	2	0.258158	367557	367957
ARS212.16	36.1164	378434	2	0.258158	368310	368710
ARS212.17	36.1164	378434	2	0.258158	369496	369896
ARS212.18	36.1164	378434	2	0.258158	370085	370485
ARS212.19	36.1164	378434	2	0.258158	371453	371853
ARS212.20	36.1164	378434	2	0.258158	372072	372472
ARS212.21	36.1164	378434	2	0.258158	373672	374072
ARS212.22	36.1164	378434	2	0.258158	374086	374486
ARS212.23	36.1164	378434	2	0.258158	374519	374919
ARS212.24	36.1164	378434	2	0.258158	375262	375662
ARS212.25	36.1164	378434	2	0.258158	375837	376237
ARS212.26	36.1164	378434	2	0.258158	376770	377170
ARS212.27	36.1164	378434	2	0.258158	377486	377886
ARS212.28	36.1164	378434	2	0.258158	378434	378834
ARS212.29	36.1164	378434	2	0.258158	379349	379749
ARS212.30	36.1164	378434	2	0.258158	379785	380185
ARS212.31	36.1164	378434	2	0.258158	380597	380997
ARS212.32	36.1164	378434	2	0.258158	381327	381727
ARS212.33	36.1164	378434	2	0.258158	382086	382486
ARS212.34	36.1164	378434	2	0.258158	382531	382931
ARS212.35	36.1164	378434	2	0.258158	383213	383613
ARS213.0	38.7318	389245	2	0.335928	384597	384997
ARS213.1	38.7318	389245	2	0.335928	385009	385409
ARS213.2	38.7318	389245	2	0.335928	385561	385961
ARS213.3	38.7318	389245	2	0.335928	386364	386764
ARS213.4	38.7318	389245	2	0.335928	386797	387197
ARS213.5	38.7318	389245	2	0.335928	387597	387997
ARS213.6	38.7318	389245	2	0.335928	388668	389068
ARS213.7	38.7318	389245	2	0.335928	389538	389938
ARS213.8	38.7318	389245	2	0.335928	390536	390936
ARS213.9	38.7318	389245	2	0.335928	391349	391749
ARS213.10	38.7318	389245	2	0.335928	391780	392180
ARS213.11	38.7318	389245	2	0.335928	392506	392906
ARS213.12	38.7318	389245	2	0.335928	393532	393932
ARS213.13	38.7318	389245	2	0.335928	394047	394447
ARS213.14	38.7318	389245	2	0.335928	395302	395702
ARS213.15	38.7318	389245	2	0.335928	396052	396452
ARS213.16	38.7318	389245	2	0.335928	396752	397152
ARS213.17	38.7318	389245	2	0.335928	397438	397478
ARS213.18	38.7318	389245	2	0.335928	398057	398457
ARS214.0	33.2079	407831	2	0.393707	398797	399197
ARS214.1	33.2079	407831	2	0.393707	399318	399718
ARS214.2	33.2079	407831	2	0.393707	400040	400440
ARS214.3	33.2079	407831	2	0.393707	401221	401621
ARS214.4	33.2079	407831	2	0.393707	401821	402221
ARS214.5	33.2079	407831	2	0.393707	402401	402801
ARS214.6	33.2079	407831	2	0.393707	403310	403710
ARS214.7	33.2079	407831	2	0.393707	404825	405225
ARS214.8	33.2079	407831	2	0.393707	406032	406432
ARS214.9	33.2079	407831	2	0.393707	406573	406973
ARS214.10	33.2079	407831	2	0.393707	407254	407654
ARS214.11	33.2079	407831	2	0.393707	408209	408609
ARS214.12	33.2079	407831	2	0.393707	409251	409651
ARS214.13	33.2079	407831	2	0.393707	409675	410075
ARS214.14	33.2079	407831	2	0.393707	410235	410434
ARS214.15	33.2079	407831	2	0.393707	410599	410635
ARS214.16	33.2079	407831	2	0.393707	410776	410999
ARS214.17	33.2079	407831	2	0.393707	411255	411655
ARS214.18	33.2079	407831	2	0.393707	412200	412600
ARS215.0	38.7691	417739	2	0.442598	413142	413542
ARS215.1	38.7691	417739	2	0.442598	414351	414751
ARS215.2	38.7691	417739	2	0.442598	415325	415725
ARS215.3	38.7691	417739	2	0.442598	415893	416293
ARS215.4	38.7691	417739	2	0.442598	416589	416989
ARS215.5	38.7691	417739	2	0.442598	417433	417833
ARS215.6	38.7691	417739	2	0.442598	418792	419192
ARS215.7	38.7691	417739	2	0.442598	419866	420266
ARS215.8	38.7691	417739	2	0.442598	420384	420784
ARS215.9	38.7691	417739	2	0.442598	421250	421650
ARS215.10	38.7691	417739	2	0.442598	422206	422606
ARS215.11	38.7691	417739	2	0.442598	422835	423235
ARS215.12	38.7691	417739	2	0.442598	423834	424234
ARS215.13	38.7691	417739	2	0.442598	424977	425377
ARS215.14	38.7691	417739	2	0.442598	425455	425740
ARS215.15	38.7691	417739	2	0.442598	426624	427024
ARS215.16	38.7691	417739	2	0.442598	427060	427460
ARS215.17	38.7691	417739	2	0.442598	427779	428179
ARS215.18	38.7691	417739	2	0.442598	428542	428577
ARS215.19	38.7691	417739	2	0.442598	428861	428942
ARS215.5.0	43.2072	440859	2	0.301065	429487	429887
ARS215.5.1	43.2072	440859	2	0.301065	430141	430541
ARS215.5.2	43.2072	440859	2	0.301065	430704	430821
ARS215.5.3	43.2072	440859	2	0.301065	431419	431819
ARS215.5.4	43.2072	440859	2	0.301065	432386	432786
ARS215.5.5	43.2072	440859	2	0.301065	432817	433217
ARS215.5.6	43.2072	440859	2	0.301065	433809	434209
ARS215.5.7	43.2072	440859	2	0.301065	434821	435221
ARS215.5.8	43.2072	440859	2	0.301065	435373	435773
ARS215.5.9	43.2072	440859	2	0.301065	436417	436817
ARS215.5.10	43.2072	440859	2	0.301065	438497	438897
ARS215.5.11	43.2072	440859	2	0.301065	439584	439984
ARS215.5.12	43.2072	440859	2	0.301065	440636	441036
ARS215.5.13	43.2072	440859	2	0.301065	441554	441954
ARS215.5.14	43.2072	440859	2	0.301065	441973	442373
ARS215.5.15	43.2072	440859	2	0.301065	442410	442810
ARS215.5.16	43.2072	440859	2	0.301065	443141	443541
ARS215.5.17	43.2072	440859	2	0.301065	444186	444586
ARS215.5.18	43.2072	440859	2	0.301065	444898	445298
ARS215.5.19	43.2072	440859	2	0.301065	445977	446377
ARS215.5.20	43.2072	440859	2	0.301065	446710	447110
ARS215.5.21	43.2072	440859	2	0.301065	447649	448049
ARS215.5.22	43.2072	440859	2	0.301065	448487	448887
ARS215.5.23	43.2072	440859	2	0.301065	448988	449388
ARS215.5.24	43.2072	440859	2	0.301065	449799	450199
ARS215.5.25	43.2072	440859	2	0.301065	450404	450804
ARS215.5.26	43.2072	440859	2	0.301065	451093	451493
ARS215.5.27	43.2072	440859	2	0.301065	451674	451810
ARS215.5.28	43.2072	440859	2	0.301065	452786	453186
ARS215.5.29	43.2072	440859	2	0.301065	453683	454083
ARS215.5.30	43.2072	440859	2	0.301065	454428	454828
ARS215.5.31	43.2072	440859	2	0.301065	454872	455272
ARS215.5.32	43.2072	440859	2	0.301065	455675	456075
ARS215.5.33	43.2072	440859	2	0.301065	456830	457230
ARS215.5.34	43.2072	440859	2	0.301065	457457	457571
ARS215.5.35	43.2072	440859	2	0.301065	457772	457857
ARS215.5.36	43.2072	440859	2	0.301065	458531	458931
ARS215.5.37	43.2072	440859	2	0.301065	459827	460227
ARS215.5.38	43.2072	440859	2	0.301065	460332	460732
ARS215.5.39	43.2072	440859	2	0.301065	461112	461512
ARS215.5.40	43.2072	440859	2	0.301065	461775	461834
ARS215.5.41	43.2072	440859	2	0.301065	463138	463538
ARS215.5.42	43.2072	440859	2	0.301065	463629	464029
ARS216.0	25.7518	486661	2	0.333508	464071	464471
ARS216.1	25.7518	486661	2	0.333508	464518	464918
ARS216.2	25.7518	486661	2	0.333508	464953	465353
ARS216.3	25.7518	486661	2	0.333508	465463	465863
ARS216.4	25.7518	486661	2	0.333508	467104	467504
ARS216.5	25.7518	486661	2	0.333508	467907	468307
ARS216.6	25.7518	486661	2	0.333508	468898	469298
ARS216.7	25.7518	486661	2	0.333508	469643	470043
ARS216.8	25.7518	486661	2	0.333508	470293	470693
ARS216.9	25.7518	486661	2	0.333508	470807	471207
ARS216.10	25.7518	486661	2	0.333508	471466	471866
ARS216.11	25.7518	486661	2	0.333508	472237	472637
ARS216.12	25.7518	486661	2	0.333508	472807	472935
ARS216.13	25.7518	486661	2	0.333508	473075	473207
ARS216.14	25.7518	486661	2	0.333508	473717	474117
ARS216.15	25.7518	486661	2	0.333508	474888	475288
ARS216.16	25.7518	486661	2	0.333508	475534	475550
ARS216.17	25.7518	486661	2	0.333508	475792	475934
ARS216.18	25.7518	486661	2	0.333508	476150	476192
ARS216.19	25.7518	486661	2	0.333508	476748	477148
ARS216.20	25.7518	486661	2	0.333508	479555	479955
ARS216.21	25.7518	486661	2	0.333508	480139	480273
ARS216.22	25.7518	486661	2	0.333508	481305	481705
ARS216.23	25.7518	486661	2	0.333508	482642	483042
ARS216.24	25.7518	486661	2	0.333508	483613	484013
ARS216.25	25.7518	486661	2	0.333508	484102	484502
ARS216.26	25.7518	486661	2	0.333508	484782	485182
ARS216.27	25.7518	486661	2	0.333508	485606	486006
ARS216.28	25.7518	486661	2	0.333508	486256	486656
ARS216.29	25.7518	486661	2	0.333508	487357	487757
ARS216.30	25.7518	486661	2	0.333508	487935	487958
ARS216.31	25.7518	486661	2	0.333508	488407	488807
ARS216.32	25.7518	486661	2	0.333508	489268	489668
ARS216.33	25.7518	486661	2	0.333508	489841	490241
ARS216.34	25.7518	486661	2	0.333508	490336	490545
ARS216.35	25.7518	486661	2	0.333508	490762	490934
ARS216.36	25.7518	486661	2	0.333508	491634	492034
ARS216.37	25.7518	486661	2	0.333508	492114	492212
ARS216.38	25.7518	486661	2	0.333508	492933	493333
ARS216.39	25.7518	486661	2	0.333508	493955	494355
ARS216.40	25.7518	486661	2	0.333508	495077	495477
ARS216.41	25.7518	486661	2	0.333508	495837	496237
ARS216.42	25.7518	486661	2	0.333508	496783	497183
ARS216.43	25.7518	486661	2	0.333508	497978	498378
ARS216.44	25.7518	486661	2	0.333508	498549	498949
ARS216.45	25.7518	486661	2	0.333508	499809	500209
ARS216.46	25.7518	486661	2	0.333508	500764	501164
ARS216.47	25.7518	486661	2	0.333508	501464	501864
ARS217.0	41.8241	516805	2	0.304752	502673	503073
ARS217.1	41.8241	516805	2	0.304752	503491	503891
ARS217.2	41.8241	516805	2	0.304752	504065	504465
ARS217.3	41.8241	516805	2	0.304752	504701	505101
ARS217.4	41.8241	516805	2	0.304752	505587	505987
ARS217.5	41.8241	516805	2	0.304752	506703	507103
ARS217.6	41.8241	516805	2	0.304752	508198	508598
ARS217.7	41.8241	516805	2	0.304752	508777	508968
ARS217.8	41.8241	516805	2	0.304752	509724	510124
ARS217.9	41.8241	516805	2	0.304752	510661	511061
ARS217.10	41.8241	516805	2	0.304752	511546	511946
ARS217.11	41.8241	516805	2	0.304752	512223	512623
ARS217.12	41.8241	516805	2	0.304752	512942	512995
ARS217.13	41.8241	516805	2	0.304752	513300	513342
ARS217.14	41.8241	516805	2	0.304752	513939	514339
ARS217.15	41.8241	516805	2	0.304752	514753	515153
ARS217.16	41.8241	516805	2	0.304752	516045	516445
ARS217.17	41.8241	516805	2	0.304752	516526	516926
ARS217.18	41.8241	516805	2	0.304752	517445	517845
ARS217.19	41.8241	516805	2	0.304752	518052	518215
ARS217.20	41.8241	516805	2	0.304752	519063	519463
ARS217.21	41.8241	516805	2	0.304752	520020	520420
ARS217.22	41.8241	516805	2	0.304752	520891	521291
ARS217.23	41.8241	516805	2	0.304752	521305	521705
ARS217.24	41.8241	516805	2	0.304752	522588	522988
ARS217.25	41.8241	516805	2	0.304752	523757	524157
ARS217.26	41.8241	516805	2	0.304752	524838	525238
ARS217.27	41.8241	516805	2	0.304752	525295	525345
ARS217.28	41.8241	516805	2	0.304752	525716	526116
ARS217.29	41.8241	516805	2	0.304752	527031	527431
ARS218.0	44.308	539137	2	0.283662	528507	528907
ARS218.1	44.308	539137	2	0.283662	529346	529746
ARS218.2	44.308	539137	2	0.283662	529756	530156
ARS218.3	44.308	539137	2	0.283662	530414	530488
ARS218.4	44.308	539137	2	0.283662	531226	531626
ARS218.5	44.308	539137	2	0.283662	532584	532984
ARS218.6	44.308	539137	2	0.283662	533496	533896
ARS218.7	44.308	539137	2	0.283662	534138	534538
ARS218.8	44.308	539137	2	0.283662	535147	535547
ARS218.9	44.308	539137	2	0.283662	535845	536245
ARS218.10	44.308	539137	2	0.283662	537024	537424
ARS218.11	44.308	539137	2	0.283662	537744	538144
ARS218.12	44.308	539137	2	0.283662	538666	539066
ARS218.13	44.308	539137	2	0.283662	539484	539884
ARS218.14	44.308	539137	2	0.283662	540036	540436
ARS218.15	44.308	539137	2	0.283662	540472	540475
ARS218.16	44.308	539137	2	0.283662	540664	540872
ARS218.17	44.308	539137	2	0.283662	541990	542390
ARS218.18	44.308	539137	2	0.283662	542880	543280
ARS218.19	44.308	539137	2	0.283662	543752	544152
ARS218.20	44.308	539137	2	0.283662	544211	544230
ARS218.21	44.308	539137	2	0.283662	544967	545367
ARS218.22	44.308	539137	2	0.283662	545770	546170
ARS218.23	44.308	539137	2	0.283662	546409	546809
ARS218.24	44.308	539137	2	0.283662	547577	547977
ARS218.25	44.308	539137	2	0.283662	548000	548400
ARS218.26	44.308	539137	2	0.283662	548716	549116
ARS218.27	44.308	539137	2	0.283662	549231	549631
ARS218.28	44.308	539137	2	0.283662	549980	550380
ARS218.29	44.308	539137	2	0.283662	550619	551019
ARS218.30	44.308	539137	2	0.283662	551080	551480
ARS218.31	44.308	539137	2	0.283662	552587	552987
ARS218.32	44.308	539137	2	0.283662	553725	554125
ARS218.33	44.308	539137	2	0.283662	555462	555862
ARS218.34	44.308	539137	2	0.283662	556749	557149
ARS218.35	44.308	539137	2	0.283662	557678	558078
ARS218.36	44.308	539137	2	0.283662	558764	559164
ARS218.37	44.308	539137	2	0.283662	559470	559870
ARS218.38	44.308	539137	2	0.283662	560369	560769
ARS218.39	44.308	539137	2	0.283662	561201	561601
ARS218.40	44.308	539137	2	0.283662	562042	562442
ARS218.41	44.308	539137	2	0.283662	562609	563009
ARS218.42	44.308	539137	2	0.283662	563164	563564
ARS218.43	44.308	539137	2	0.283662	563839	564239
ARS218.44	44.308	539137	2	0.283662	564272	564672
ARS219.0	36.2972	591424	2	0.281591	565822	566222
ARS219.1	36.2972	591424	2	0.281591	566427	566827
ARS219.2	36.2972	591424	2	0.281591	567147	567547
ARS219.3	36.2972	591424	2	0.281591	568056	568456
ARS219.4	36.2972	591424	2	0.281591	568881	569281
ARS219.5	36.2972	591424	2	0.281591	570080	570480
ARS219.6	36.2972	591424	2	0.281591	570687	571087
ARS219.7	36.2972	591424	2	0.281591	571598	571998
ARS219.8	36.2972	591424	2	0.281591	572170	572570
ARS219.9	36.2972	591424	2	0.281591	572708	573108
ARS219.10	36.2972	591424	2	0.281591	573486	573886
ARS219.11	36.2972	591424	2	0.281591	574483	574883
ARS219.12	36.2972	591424	2	0.281591	575768	576168
ARS219.13	36.2972	591424	2	0.281591	576568	576968
ARS219.14	36.2972	591424	2	0.281591	577309	577709
ARS219.15	36.2972	591424	2	0.281591	577820	578220
ARS219.16	36.2972	591424	2	0.281591	578595	578995
ARS219.17	36.2972	591424	2	0.281591	579412	579812
ARS219.18	36.2972	591424	2	0.281591	580654	581054
ARS219.19	36.2972	591424	2	0.281591	581259	581659
ARS219.20	36.2972	591424	2	0.281591	582493	582893
ARS219.21	36.2972	591424	2	0.281591	583533	583933
ARS219.22	36.2972	591424	2	0.281591	584200	584600
ARS219.23	36.2972	591424	2	0.281591	584823	585223
ARS219.24	36.2972	591424	2	0.281591	585538	585619
ARS219.25	36.2972	591424	2	0.281591	585903	585938
ARS219.26	36.2972	591424	2	0.281591	586652	587052
ARS219.27	36.2972	591424	2	0.281591	587312	587712
ARS219.28	36.2972	591424	2	0.281591	587725	588125
ARS219.29	36.2972	591424	2	0.281591	588318	588718
ARS219.30	36.2972	591424	2	0.281591	589115	589515
ARS219.31	36.2972	591424	2	0.281591	589771	590171
ARS219.32	36.2972	591424	2	0.281591	590828	591228
ARS219.33	36.2972	591424	2	0.281591	592594	592994
ARS219.34	36.2972	591424	2	0.281591	593286	593686
ARS219.35	36.2972	591424	2	0.281591	593760	594160
ARS219.36	36.2972	591424	2	0.281591	594269	594409
ARS219.37	36.2972	591424	2	0.281591	595141	595541
ARS219.38	36.2972	591424	2	0.281591	596498	596898
ARS219.39	36.2972	591424	2	0.281591	597520	597920
ARS219.40	36.2972	591424	2	0.281591	597929	598329
ARS219.41	36.2972	591424	2	0.281591	598626	599026
ARS219.42	36.2972	591424	2	0.281591	599330	599730
ARS219.43	36.2972	591424	2	0.281591	599840	600240
ARS219.44	36.2972	591424	2	0.281591	601035	601435
ARS219.45	36.2972	591424	2	0.281591	601453	601853
ARS219.5.0	35.798	611269	2	0.336689	602172	602572
ARS219.5.1	35.798	611269	2	0.336689	602762	603162
ARS219.5.2	35.798	611269	2	0.336689	603293	603693
ARS219.5.3	35.798	611269	2	0.336689	604002	604402
ARS219.5.4	35.798	611269	2	0.336689	605243	605643
ARS219.5.5	35.798	611269	2	0.336689	605892	606292
ARS219.5.6	35.798	611269	2	0.336689	606637	607037
ARS219.5.7	35.798	611269	2	0.336689	607692	608092
ARS219.5.8	35.798	611269	2	0.336689	608405	608492
ARS219.5.9	35.798	611269	2	0.336689	609069	609469
ARS219.5.10	35.798	611269	2	0.336689	609575	609975
ARS219.5.11	35.798	611269	2	0.336689	610174	610574
ARS219.5.12	35.798	611269	2	0.336689	611177	611577
ARS219.5.13	35.798	611269	2	0.336689	612364	612764
ARS219.5.14	35.798	611269	2	0.336689	612791	613191
ARS219.5.15	35.798	611269	2	0.336689	613360	613760
ARS219.5.16	35.798	611269	2	0.336689	614328	614728
ARS219.5.17	35.798	611269	2	0.336689	615406	615806
ARS219.5.18	35.798	611269	2	0.336689	616486	616886
ARS219.5.19	35.798	611269	2	0.336689	616898	617038
ARS219.5.20	35.798	611269	2	0.336689	617050	617298
ARS220.0	35.0305	622625	2	0.515438	617398	617798
ARS220.1	35.0305	622625	2	0.515438	618199	618599
ARS220.2	35.0305	622625	2	0.515438	618771	619171
ARS220.3	35.0305	622625	2	0.515438	619418	619818
ARS220.4	35.0305	622625	2	0.515438	620059	620459
ARS220.5	35.0305	622625	2	0.515438	621540	621940
ARS220.6	35.0305	622625	2	0.515438	622091	622491
ARS220.7	35.0305	622625	2	0.515438	622965	623365
ARS220.8	35.0305	622625	2	0.515438	623459	623859
ARS220.9	35.0305	622625	2	0.515438	624539	624939
ARS220.10	35.0305	622625	2	0.515438	625223	625623
ARS220.11	35.0305	622625	2	0.515438	625893	626293
ARS220.12	35.0305	622625	2	0.515438	626428	626505
ARS220.13	35.0305	622625	2	0.515438	626863	627263
ARS221.0	38.7598	631934	2	0.334862	627560	627960
ARS221.1	38.7598	631934	2	0.334862	628343	628743
ARS221.2	38.7598	631934	2	0.334862	629274	629674
ARS221.3	38.7598	631934	2	0.334862	629838	630238
ARS221.4	38.7598	631934	2	0.334862	630281	630339
ARS221.5	38.7598	631934	2	0.334862	630976	631376
ARS221.6	38.7598	631934	2	0.334862	631758	632158
ARS221.7	38.7598	631934	2	0.334862	632599	632999
ARS221.8	38.7598	631934	2	0.334862	633249	633264
ARS221.9	38.7598	631934	2	0.334862	633518	633649
ARS221.10	38.7598	631934	2	0.334862	634005	634405
ARS221.11	38.7598	631934	2	0.334862	634658	635058
ARS221.12	38.7598	631934	2	0.334862	635340	635740
ARS221.13	38.7598	631934	2	0.334862	635964	636364
ARS221.14	38.7598	631934	2	0.334862	637113	637513
ARS221.15	38.7598	631934	2	0.334862	637776	638176
ARS221.16	38.7598	631934	2	0.334862	638465	638865
ARS221.17	38.7598	631934	2	0.334862	639604	640004
ARS221.18	38.7598	631934	2	0.334862	640541	640941
ARS221.19	38.7598	631934	2	0.334862	641556	641956
ARS221.20	38.7598	631934	2	0.334862	643293	643693
ARS221.21	38.7598	631934	2	0.334862	643998	644398
ARS221.22	38.7598	631934	2	0.334862	644685	645085
ARS221.23	38.7598	631934	2	0.334862	646187	646587
ARS221.24	38.7598	631934	2	0.334862	646926	647326
ARS221.25	38.7598	631934	2	0.334862	647847	648247
ARS221.26	38.7598	631934	2	0.334862	648481	648881
ARS221.27	38.7598	631934	2	0.334862	649010	649410
ARS221.28	38.7598	631934	2	0.334862	649560	649960
ARS221.29	38.7598	631934	2	0.334862	650452	650852
ARS221.30	38.7598	631934	2	0.334862	650912	651312
ARS221.31	38.7598	631934	2	0.334862	651896	652296
ARS221.32	38.7598	631934	2	0.334862	652638	653038
ARS221.33	38.7598	631934	2	0.334862	653421	653821
ARS221.5.0	46.2671	675947	2	0.297908	654370	654770
ARS221.5.1	46.2671	675947	2	0.297908	655023	655423
ARS221.5.2	46.2671	675947	2	0.297908	655880	656280
ARS221.5.3	46.2671	675947	2	0.297908	656486	656886
ARS221.5.4	46.2671	675947	2	0.297908	657426	657826
ARS221.5.5	46.2671	675947	2	0.297908	657879	658114
ARS221.5.6	46.2671	675947	2	0.297908	658203	658279
ARS221.5.7	46.2671	675947	2	0.297908	659026	659426
ARS221.5.8	46.2671	675947	2	0.297908	659560	659772
ARS221.5.9	46.2671	675947	2	0.297908	659802	659960
ARS221.5.10	46.2671	675947	2	0.297908	660291	660691
ARS221.5.11	46.2671	675947	2	0.297908	660880	661280
ARS221.5.12	46.2671	675947	2	0.297908	661700	662100
ARS221.5.13	46.2671	675947	2	0.297908	662790	663190
ARS221.5.14	46.2671	675947	2	0.297908	663341	663741
ARS221.5.15	46.2671	675947	2	0.297908	664261	664661
ARS221.5.16	46.2671	675947	2	0.297908	665135	665535
ARS221.5.17	46.2671	675947	2	0.297908	665636	666036
ARS221.5.18	46.2671	675947	2	0.297908	666600	667000
ARS221.5.19	46.2671	675947	2	0.297908	667375	667775
ARS221.5.20	46.2671	675947	2	0.297908	668033	668433
ARS221.5.21	46.2671	675947	2	0.297908	668507	668571
ARS221.5.22	46.2671	675947	2	0.297908	669136	669536
ARS221.5.23	46.2671	675947	2	0.297908	669978	670378
ARS221.5.24	46.2671	675947	2	0.297908	671070	671470
ARS221.5.25	46.2671	675947	2	0.297908	671737	672137
ARS221.5.26	46.2671	675947	2	0.297908	672490	672890
ARS221.5.27	46.2671	675947	2	0.297908	672909	673309
ARS221.5.28	46.2671	675947	2	0.297908	673670	674070
ARS221.5.29	46.2671	675947	2	0.297908	674614	675014
ARS221.5.30	46.2671	675947	2	0.297908	675452	675852
ARS221.5.31	46.2671	675947	2	0.297908	675969	676369
ARS221.5.32	46.2671	675947	2	0.297908	677084	677484
ARS221.5.33	46.2671	675947	2	0.297908	678232	678632
ARS221.5.34	46.2671	675947	2	0.297908	679084	679484
ARS221.5.35	46.2671	675947	2	0.297908	679525	679793
ARS221.5.36	46.2671	675947	2	0.297908	680262	680662
ARS221.5.37	46.2671	675947	2	0.297908	681267	681667
ARS221.5.38	46.2671	675947	2	0.297908	682157	682557
ARS221.5.39	46.2671	675947	2	0.297908	683400	683800
ARS221.5.40	46.2671	675947	2	0.297908	684275	684675
ARS221.5.41	46.2671	675947	2	0.297908	684882	685282
ARS221.5.42	46.2671	675947	2	0.297908	685794	686194
ARS221.5.43	46.2671	675947	2	0.297908	687170	687570
ARS221.5.44	46.2671	675947	2	0.297908	687811	688211
ARS221.5.45	46.2671	675947	2	0.297908	688750	689150
ARS221.5.46	46.2671	675947	2	0.297908	689513	689913
ARS221.5.47	46.2671	675947	2	0.297908	690023	690068
ARS222.0	34.3813	704250	2	0.345413	690917	691317
ARS222.1	34.3813	704250	2	0.345413	691413	691813
ARS222.2	34.3813	704250	2	0.345413	692609	693009
ARS222.3	34.3813	704250	2	0.345413	693990	694390
ARS222.4	34.3813	704250	2	0.345413	695153	695553
ARS222.5	34.3813	704250	2	0.345413	695950	696350
ARS222.6	34.3813	704250	2	0.345413	697047	697447
ARS222.7	34.3813	704250	2	0.345413	697792	698192
ARS222.8	34.3813	704250	2	0.345413	698790	699190
ARS222.9	34.3813	704250	2	0.345413	699537	699937
ARS222.10	34.3813	704250	2	0.345413	700498	700898
ARS222.11	34.3813	704250	2	0.345413	701034	701116
ARS222.12	34.3813	704250	2	0.345413	701151	701434
ARS222.13	34.3813	704250	2	0.345413	701671	702071
ARS222.14	34.3813	704250	2	0.345413	702198	702421
ARS222.15	34.3813	704250	2	0.345413	702695	703095
ARS222.16	34.3813	704250	2	0.345413	703146	703202
ARS222.17	34.3813	704250	2	0.345413	703507	703546
ARS222.18	34.3813	704250	2	0.345413	704608	705008
ARS222.5.0	46.6478	707158	2	0.337544	705961	706361
ARS222.5.1	46.6478	707158	2	0.337544	706457	706857
ARS222.5.2	46.6478	707158	2	0.337544	707239	707639
ARS222.5.3	46.6478	707158	2	0.337544	708252	708652
ARS222.5.4	46.6478	707158	2	0.337544	708800	709200
ARS222.5.5	46.6478	707158	2	0.337544	709295	709695
ARS222.5.6	46.6478	707158	2	0.337544	710201	710601
ARS222.5.7	46.6478	707158	2	0.337544	710757	711157
ARS222.5.8	46.6478	707158	2	0.337544	711523	711923
ARS222.5.9	46.6478	707158	2	0.337544	712278	712678
ARS222.5.10	46.6478	707158	2	0.337544	713091	713491
ARS222.5.11	46.6478	707158	2	0.337544	713648	714048
ARS223.0	50.9345	720601	2	0.387245	714664	715064
ARS223.1	50.9345	720601	2	0.387245	715290	715690
ARS223.2	50.9345	720601	2	0.387245	716963	717363
ARS223.3	50.9345	720601	2	0.387245	717498	717898
ARS223.4	50.9345	720601	2	0.387245	718308	718708
ARS223.5	50.9345	720601	2	0.387245	719128	719528
ARS223.6	50.9345	720601	2	0.387245	720061	720461
ARS223.7	50.9345	720601	2	0.387245	720861	721261
ARS223.8	50.9345	720601	2	0.387245	721283	721683
ARS223.9	50.9345	720601	2	0.387245	722527	722927
ARS223.10	50.9345	720601	2	0.387245	723288	723688
ARS223.11	50.9345	720601	2	0.387245	724329	724729
ARS223.12	50.9345	720601	2	0.387245	724949	725349
ARS223.13	50.9345	720601	2	0.387245	725621	726021
ARS223.14	50.9345	720601	2	0.387245	726722	727122
ARS223.15	50.9345	720601	2	0.387245	727692	728092
ARS223.16	50.9345	720601	2	0.387245	728772	729172
ARS223.17	50.9345	720601	2	0.387245	729751	730151
ARS223.18	50.9345	720601	2	0.387245	730611	731011
ARS224.0	44.7795	741512	2	0.418325	731306	731706
ARS224.1	44.7795	741512	2	0.418325	731987	732387
ARS224.2	44.7795	741512	2	0.418325	732636	733036
ARS224.3	44.7795	741512	2	0.418325	733081	733481
ARS224.4	44.7795	741512	2	0.418325	733924	734324
ARS224.5	44.7795	741512	2	0.418325	734747	735147
ARS224.6	44.7795	741512	2	0.418325	735360	735424
ARS224.7	44.7795	741512	2	0.418325	735903	736303
ARS224.8	44.7795	741512	2	0.418325	736497	736897
ARS224.9	44.7795	741512	2	0.418325	737124	737524
ARS224.10	44.7795	741512	2	0.418325	737870	737923
ARS224.11	44.7795	741512	2	0.418325	738778	739178
ARS224.12	44.7795	741512	2	0.418325	739723	740123
ARS224.13	44.7795	741512	2	0.418325	740565	740965
ARS224.14	44.7795	741512	2	0.418325	741244	741644
ARS224.15	44.7795	741512	2	0.418325	741794	741796
ARS224.16	44.7795	741512	2	0.418325	742323	742723
ARS224.17	44.7795	741512	2	0.418325	742744	743144
ARS224.18	44.7795	741512	2	0.418325	743400	743800
ARS224.19	44.7795	741512	2	0.418325	744095	744495
ARS224.20	44.7795	741512	2	0.418325	745023	745423
ARS224.21	44.7795	741512	2	0.418325	745751	746151
ARS224.22	44.7795	741512	2	0.418325	746430	746830
ARS224.23	44.7795	741512	2	0.418325	747402	747802
ARS224.24	44.7795	741512	2	0.418325	748384	748784
ARS224.25	44.7795	741512	2	0.418325	749232	749632
ARS225.0	49.3645	757390	2	0.331893	749916	750316
ARS225.1	49.3645	757390	2	0.331893	750557	750957
ARS225.2	49.3645	757390	2	0.331893	751396	751796
ARS225.3	49.3645	757390	2	0.331893	752109	752509
ARS225.4	49.3645	757390	2	0.331893	752783	752814
ARS225.5	49.3645	757390	2	0.331893	753024	753183
ARS225.6	49.3645	757390	2	0.331893	753929	754329
ARS225.7	49.3645	757390	2	0.331893	754700	755100
ARS225.8	49.3645	757390	2	0.331893	755225	755422
ARS225.9	49.3645	757390	2	0.331893	756362	756762
ARS225.10	49.3645	757390	2	0.331893	757699	758099
ARS225.11	49.3645	757390	2	0.331893	758305	758705
ARS225.12	49.3645	757390	2	0.331893	759325	759725
ARS225.13	49.3645	757390	2	0.331893	759807	759916
ARS225.14	49.3645	757390	2	0.331893	760209	760609
ARS225.15	49.3645	757390	2	0.331893	761261	761661
ARS225.16	49.3645	757390	2	0.331893	762020	762420
ARS225.17	49.3645	757390	2	0.331893	762683	763083
ARS225.18	49.3645	757390	2	0.331893	763406	763806
ARS225.19	49.3645	757390	2	0.331893	763970	764370
ARS225.20	49.3645	757390	2	0.331893	765185	765585
ARS227.0	47.5911	773918	2	0.380195	765766	766166
ARS227.1	47.5911	773918	2	0.380195	766693	767093
ARS227.2	47.5911	773918	2	0.380195	767338	767738
ARS227.3	47.5911	773918	2	0.380195	768311	768711
ARS227.4	47.5911	773918	2	0.380195	769080	769480
ARS227.5	47.5911	773918	2	0.380195	769585	769788
ARS227.6	47.5911	773918	2	0.380195	770274	770674
ARS227.7	47.5911	773918	2	0.380195	771256	771656
ARS227.8	47.5911	773918	2	0.380195	772313	772713
ARS227.9	47.5911	773918	2	0.380195	772876	773276
ARS227.10	47.5911	773918	2	0.380195	773419	773480
ARS227.11	47.5911	773918	2	0.380195	774162	774562
ARS227.12	47.5911	773918	2	0.380195	774887	775287
ARS227.13	47.5911	773918	2	0.380195	775765	776165
ARS227.14	47.5911	773918	2	0.380195	776900	777300
ARS227.15	47.5911	773918	2	0.380195	777487	777887
ARS227.16	47.5911	773918	2	0.380195	778473	778873
ARS227.17	47.5911	773918	2	0.380195	779749	780149
ARS227.18	47.5911	773918	2	0.380195	780213	780322
ARS227.19	47.5911	773918	2	0.380195	780928	781328
ARS227.20	47.5911	773918	2	0.380195	781357	781757
ARS227.21	47.5911	773918	2	0.380195	781978	782378
ARS227.22	47.5911	773918	2	0.380195	782525	782925
ARS228.0	38.4127	792116	2	0.358362	783756	784156
ARS228.1	38.4127	792116	2	0.358362	784964	785364
ARS228.2	38.4127	792116	2	0.358362	786378	786778
ARS228.3	38.4127	792116	2	0.358362	787602	788002
ARS228.4	38.4127	792116	2	0.358362	788175	788575
ARS228.5	38.4127	792116	2	0.358362	789190	789590
ARS228.6	38.4127	792116	2	0.358362	789731	790131
ARS228.7	38.4127	792116	2	0.358362	790342	790742
ARS228.8	38.4127	792116	2	0.358362	790988	791388
ARS228.9	38.4127	792116	2	0.358362	791599	791724
ARS228.10	38.4127	792116	2	0.358362	792440	792840
ARS228.11	38.4127	792116	2	0.358362	793001	793401
ARS228.12	38.4127	792116	2	0.358362	793800	794200
ARS228.13	38.4127	792116	2	0.358362	794323	794723
ARS228.5.0	38.4644	796259	2	0.441379	794700	795100
ARS228.5.1	38.4644	796259	2	0.441379	795623	796023
ARS228.5.2	38.4644	796259	2	0.441379	796034	796434
ARS228.5.3	38.4644	796259	2	0.441379	797047	797447
ARS228.5.4	38.4644	796259	2	0.441379	798092	798492
ARS229.0	51.4969	801930	2	0.266303	799550	799950
ARS229.1	51.4969	801930	2	0.266303	800459	800859
ARS229.2	51.4969	801930	2	0.266303	800953	801353
ARS229.3	51.4969	801930	2	0.266303	801445	801845
ARS229.4	51.4969	801930	2	0.266303	801850	801980
ARS229.5	51.4969	801930	2	0.266303	802686	803086
ARS229.6	51.4969	801930	2	0.266303	803277	803409
ARS229.7	51.4969	801930	2	0.266303	803754	804154
ARS229.8	51.4969	801930	2	0.266303	804204	804553
ARS229.9	51.4969	801930	2	0.266303	805528	805928
ARS229.10	51.4969	801930	2	0.266303	807803	808203
ARS229.11	51.4969	801930	2	0.266303	808350	808750
ARS300.0	44.5196	837	3	0.115857	837	1237
ARS301.0	0	11145	3	0.066	6192	6592
ARS301.1	0	11145	3	0.066	6635	7035
ARS301.2	0	11145	3	0.066	7423	7823
ARS301.3	0	11145	3	0.066	8759	9159
ARS301.4	0	11145	3	0.066	9283	9360
ARS302.0	52.8857	11303	3	0.048	14163	14563
ARS302.0	ND	14574	3	ND
ARS303.0	51.3208	14870	3	0.112	15143	15543
ARS320.0	42.2159	15213	3	0.0834762	15436	15836
ARS320.1	42.2159	15213	3	0.0834762	15872	16272
ARS320.2	42.2159	15213	3	0.0834762	16552	16952
ARS320.3	42.2159	15213	3	0.0834762	17278	17678
ARS320.4	42.2159	15213	3	0.0834762	17920	18320
ARS320.5	42.2159	15213	3	0.0834762	18402	18802
ARS320.6	42.2159	15213	3	0.0834762	18998	19398
ARS320.7	42.2159	15213	3	0.0834762	19573	19973
ARS320.8	42.2159	15213	3	0.0834762	20056	20179
ARS320.9	42.2159	15213	3	0.0834762	20814	21214
ARS320.10	42.2159	15213	3	0.0834762	21224	21624
ARS320.11	42.2159	15213	3	0.0834762	21649	21937
ARS320.12	42.2159	15213	3	0.0834762	21949	22049
ARS320.13	42.2159	15213	3	0.0834762	22262	22349
ARS320.14	42.2159	15213	3	0.0834762	22636	22662
ARS304.0	35.6934	30199	3	0.0907222	23102	23502
ARS304.1	35.6934	30199	3	0.0907222	23717	24117
ARS304.2	35.6934	30199	3	0.0907222	24724	25124
ARS304.3	35.6934	30199	3	0.0907222	25552	25952
ARS304.4	35.6934	30199	3	0.0907222	25967	26367
ARS304.5	35.6934	30199	3	0.0907222	26551	26589
ARS304.6	35.6934	30199	3	0.0907222	27487	27887
ARS304.7	35.6934	30199	3	0.0907222	27953	28353
ARS304.8	35.6934	30199	3	0.0907222	28475	28541
ARS304.9	35.6934	30199	3	0.0907222	29108	29508
ARS304.10	35.6934	30199	3	0.0907222	29553	29953
ARS304.11	35.6934	30199	3	0.0907222	30409	30809
ARS304.12	35.6934	30199	3	0.0907222	31007	31407
ARS304.13	35.6934	30199	3	0.0907222	31635	32035
ARS304.14	35.6934	30199	3	0.0907222	32078	32478
ARS304.15	35.6934	30199	3	0.0907222	32782	32787
ARS304.16	35.6934	30199	3	0.0907222	33294	33694
ARS304.17	35.6934	30199	3	0.0907222	33837	34070
ARS304.18	35.6934	30199	3	0.0907222	34097	34237
ARS304.19	35.6934	30199	3	0.0907222	34452	34497
ARS304.20	35.6934	30199	3	0.0907222	34710	34852
ARS305.0	26.6125	39158	3	0.11387	35305	35705
ARS305.1	26.6125	39158	3	0.11387	35893	35963
ARS305.2	26.6125	39158	3	0.11387	36504	36904
ARS305.3	26.6125	39158	3	0.11387	37395	37795
ARS305.4	26.6125	39158	3	0.11387	38089	38489
ARS305.5	26.6125	39158	3	0.11387	38593	38817
ARS305.6	26.6125	39158	3	0.11387	38990	38993
ARS305.7	26.6125	39158	3	0.11387	39932	40332
ARS305.8	26.6125	39158	3	0.11387	40629	40680
ARS305.9	26.6125	39158	3	0.11387	40899	41029
ARS305.10	26.6125	39158	3	0.11387	41084	41299
ARS305.11	26.6125	39158	3	0.11387	41455	41484
ARS305.12	26.6125	39158	3	0.11387	41582	41855
ARS305.13	26.6125	39158	3	0.11387	42033	42433
ARS305.14	26.6125	39158	3	0.11387	43113	43513
ARS305.15	26.6125	39158	3	0.11387	43788	44188
ARS305.16	26.6125	39158	3	0.11387	44337	44362
ARS305.17	26.6125	39158	3	0.11387	44740	45140
ARS305.18	26.6125	39158	3	0.11387	45170	45570
ARS305.19	26.6125	39158	3	0.11387	45614	46014
ARS305.20	26.6125	39158	3	0.11387	46137	46537
ARS305.21	26.6125	39158	3	0.11387	46673	46813
ARS305.22	26.6125	39158	3	0.11387	47122	47522
ARS305.23	26.6125	39158	3	0.11387	47587	47987
ARS305.24	26.6125	39158	3	0.11387	47996	48207
ARS305.25	26.6125	39158	3	0.11387	48319	48396
ARS305.26	26.6125	39158	3	0.11387	48753	49153
ARS305.27	26.6125	39158	3	0.11387	49702	50102
ARS305.28	26.6125	39158	3	0.11387	50589	50989
ARS305.29	26.6125	39158	3	0.11387	51239	51351
ARS305.30	26.6125	39158	3	0.11387	51613	51639
ARS305.31	26.6125	39158	3	0.11387	51796	52013
ARS305.32	26.6125	39158	3	0.11387	52587	52987
ARS305.33	26.6125	39158	3	0.11387	53080	53122
ARS305.34	26.6125	39158	3	0.11387	53549	53949
ARS305.35	26.6125	39158	3	0.11387	54043	54127
ARS305.36	26.6125	39158	3	0.11387	54199	54443
ARS305.37	26.6125	39158	3	0.11387	54685	54719
ARS305.38	26.6125	39158	3	0.11387	55298	55698
ARS305.39	26.6125	39158	3	0.11387	56228	56628
ARS306.0	26.0604	74457	3	0.51778	57082	57482
ARS306.1	26.0604	74457	3	0.51778	62080	62480
ARS306.2	26.0604	74457	3	0.51778	70452	70852
ARS306.3	26.0604	74457	3	0.51778	73524	73924
ARS306.4	26.0604	74457	3	0.51778	73950	74350
ARS306.5	26.0604	74457	3	0.51778	74858	75258
ARS306.6	26.0604	74457	3	0.51778	78302	78702
ARS306.7	26.0604	74457	3	0.51778	79187	79587
ARS307.0	26.3099	108775	3	0.129278	92512	92912
ARS307.1	26.3099	108775	3	0.129278	93114	93514
ARS307.2	26.3099	108775	3	0.129278	93597	94398
ARS307.3	26.3099	108775	3	0.129278	94860	95260
ARS307.4	26.3099	108775	3	0.129278	95673	96073
ARS307.5	26.3099	108775	3	0.129278	96330	96730
ARS307.6	26.3099	108775	3	0.129278	96958	97358
ARS307.7	26.3099	108775	3	0.129278	97856	98256
ARS307.8	26.3099	108775	3	0.129278	98513	98913
ARS307.9	26.3099	108775	3	0.129278	99031	99431
ARS307.10	26.3099	108775	3	0.129278	99939	100339
ARS307.11	26.3099	108775	3	0.129278	100792	101192
ARS307.12	26.3099	108775	3	0.129278	102287	102687
ARS307.13	26.3099	108775	3	0.129278	103018	103418
ARS307.14	26.3099	108775	3	0.129278	103494	103666
ARS307.15	26.3099	108775	3	0.129278	103731	103894
ARS307.16	26.3099	108775	3	0.129278	104554	104954
ARS307.17	26.3099	108775	3	0.129278	105355	105755
ARS307.18	26.3099	108775	3	0.129278	106225	106625
ARS307.19	26.3099	108775	3	0.129278	107682	108082
ARS307.20	26.3099	108775	3	0.129278	108132	108349
ARS307.21	26.3099	108775	3	0.129278	108627	109027
ARS307.22	26.3099	108775	3	0.129278	109493	109893
ARS307.23	26.3099	108775	3	0.129278	110251	110651
ARS307.24	26.3099	108775	3	0.129278	110949	111349
ARS308.0	38.6238	114314	3	0.0899631	112173	112573
ARS308.1	38.6238	114314	3	0.0899631	112726	113126
ARS308.2	38.6238	114314	3	0.0899631	113232	113632
ARS308.3	38.6238	114314	3	0.0899631	113736	114136
ARS308.4	38.6238	114314	3	0.0899631	114883	115283
ARS308.5	38.6238	114314	3	0.0899631	115713	116113
ARS308.6	38.6238	114314	3	0.0899631	116275	116496
ARS308.7	38.6238	114314	3	0.0899631	116567	116675
ARS308.8	38.6238	114314	3	0.0899631	116772	116967
ARS308.9	38.6238	114314	3	0.0899631	117166	117172
ARS308.10	38.6238	114314	3	0.0899631	117304	117566
ARS308.11	38.6238	114314	3	0.0899631	117959	118359
ARS308.12	38.6238	114314	3	0.0899631	118703	119103
ARS308.13	38.6238	114314	3	0.0899631	119564	119964
ARS308.14	38.6238	114314	3	0.0899631	120062	120121
ARS308.15	38.6238	114314	3	0.0899631	120149	120152
ARS308.16	38.6238	114314	3	0.0899631	120437	120462
ARS308.17	38.6238	114314	3	0.0899631	121304	121704
ARS308.18	38.6238	114314	3	0.0899631	121728	122128
ARS308.19	38.6238	114314	3	0.0899631	122642	123042
ARS308.20	38.6238	114314	3	0.0899631	123106	123506
ARS309.0	32.2809	131978	3	0.0992925	123531	123931
ARS309.1	32.2809	131978	3	0.0992925	124045	124445
ARS309.2	32.2809	131978	3	0.0992925	124683	125083
ARS309.3	32.2809	131978	3	0.0992925	125514	125914
ARS309.4	32.2809	131978	3	0.0992925	126069	126469
ARS309.5	32.2809	131978	3	0.0992925	126928	127328
ARS309.6	32.2809	131978	3	0.0992925	128477	128877
ARS309.7	32.2809	131978	3	0.0992925	129096	129496
ARS309.8	32.2809	131978	3	0.0992925	129592	129992
ARS309.9	32.2809	131978	3	0.0992925	130193	130285
ARS309.10	32.2809	131978	3	0.0992925	130779	131179
ARS309.11	32.2809	131978	3	0.0992925	131306	131355
ARS309.12	32.2809	131978	3	0.0992925	131576	131706
ARS309.13	32.2809	131978	3	0.0992925	132309	132709
ARS309.14	32.2809	131978	3	0.0992925	132767	132886
ARS309.15	32.2809	131978	3	0.0992925	132996	133167
ARS309.16	32.2809	131978	3	0.0992925	133334	133396
ARS309.17	32.2809	131978	3	0.0992925	133479	133734
ARS309.18	32.2809	131978	3	0.0992925	133839	133879
ARS309.19	32.2809	131978	3	0.0992925	134275	134675
ARS309.20	32.2809	131978	3	0.0992925	134703	135103
ARS309.21	32.2809	131978	3	0.0992925	135647	136047
ARS309.22	32.2809	131978	3	0.0992925	136058	136458
ARS309.23	32.2809	131978	3	0.0992925	137757	138157
ARS309.24	32.2809	131978	3	0.0992925	138707	139107
ARS309.25	32.2809	131978	3	0.0992925	139909	140309
ARS309.26	32.2809	131978	3	0.0992925	141149	141549
ARS309.27	32.2809	131978	3	0.0992925	142061	142461
ARS309.28	32.2809	131978	3	0.0992925	143761	144161
ARS309.29	32.2809	131978	3	0.0992925	144369	144769
ARS309.30	32.2809	131978	3	0.0992925	144823	145223
ARS309.31	32.2809	131978	3	0.0992925	145546	145563
ARS309.32	32.2809	131978	3	0.0992925	145925	145946
ARS309.33	32.2809	131978	3	0.0992925	146376	146776
ARS309.34	32.2809	131978	3	0.0992925	147036	147436
ARS309.35	32.2809	131978	3	0.0992925	147571	147627
ARS310.0	36.5517	166494	3	0.0824014	152485	152885
ARS310.1	36.5517	166494	3	0.0824014	153012	153412
ARS310.2	36.5517	166494	3	0.0824014	153561	153961
ARS310.3	36.5517	166494	3	0.0824014	154020	154420
ARS310.4	36.5517	166494	3	0.0824014	154838	155238
ARS310.5	36.5517	166494	3	0.0824014	155270	155399
ARS310.6	36.5517	166494	3	0.0824014	155459	155670
ARS310.7	36.5517	166494	3	0.0824014	156067	156467
ARS310.8	36.5517	166494	3	0.0824014	156814	157214
ARS310.9	36.5517	166494	3	0.0824014	157352	157752
ARS310.10	36.5517	166494	3	0.0824014	157846	158246
ARS310.11	36.5517	166494	3	0.0824014	158261	158661
ARS310.12	36.5517	166494	3	0.0824014	158717	159117
ARS310.13	36.5517	166494	3	0.0824014	159232	159455
ARS310.14	36.5517	166494	3	0.0824014	159675	160075
ARS310.15	36.5517	166494	3	0.0824014	160936	161336
ARS310.16	36.5517	166494	3	0.0824014	161396	161796
ARS310.17	36.5517	166494	3	0.0824014	161864	162264
ARS310.18	36.5517	166494	3	0.0824014	162721	163121
ARS310.19	36.5517	166494	3	0.0824014	163604	164004
ARS310.20	36.5517	166494	3	0.0824014	164101	164501
ARS310.21	36.5517	166494	3	0.0824014	165077	165477
ARS310.22	36.5517	166494	3	0.0824014	165753	165833
ARS310.23	36.5517	166494	3	0.0824014	166025	166153
ARS310.24	36.5517	166494	3	0.0824014	166225	166425
ARS310.25	36.5517	166494	3	0.0824014	166505	166625
ARS310.26	36.5517	166494	3	0.0824014	167415	167815
ARS310.27	36.5517	166494	3	0.0824014	167909	168309
ARS310.28	36.5517	166494	3	0.0824014	169784	170184
ARS310.29	36.5517	166494	3	0.0824014	170266	170342
ARS310.30	36.5517	166494	3	0.0824014	170663	170666
ARS310.31	36.5517	166494	3	0.0824014	170943	171063
ARS310.32	36.5517	166494	3	0.0824014	171186	171343
ARS310.33	36.5517	166494	3	0.0824014	171813	172213
ARS310.34	36.5517	166494	3	0.0824014	172947	173347
ARS310.35	36.5517	166494	3	0.0824014	173819	174219
ARS310.36	36.5517	166494	3	0.0824014	174480	174880
ARS310.37	36.5517	166494	3	0.0824014	175436	175836
ARS310.38	36.5517	166494	3	0.0824014	176008	176408
ARS310.39	36.5517	166494	3	0.0824014	176754	177154
ARS310.40	36.5517	166494	3	0.0824014	177158	177558
ARS310.41	36.5517	166494	3	0.0824014	177753	177930
ARS310.42	36.5517	166494	3	0.0824014	178562	178962
ARS310.43	36.5517	166494	3	0.0824014	178986	179386
ARS310.44	36.5517	166494	3	0.0824014	179544	179944
ARS313.0	45.122	194256	3	0.0724091	180616	181016
ARS313.1	45.122	194256	3	0.0724091	181577	181977
ARS313.2	45.122	194256	3	0.0724091	182116	182311
ARS313.3	45.122	194256	3	0.0724091	182413	182516
ARS313.4	45.122	194256	3	0.0724091	182623	182813
ARS313.5	45.122	194256	3	0.0724091	183068	183468
ARS313.6	45.122	194256	3	0.0724091	183789	184189
ARS313.7	45.122	194256	3	0.0724091	184330	184730
ARS313.8	45.122	194256	3	0.0724091	184810	185101
ARS313.9	45.122	194256	3	0.0724091	185315	185715
ARS313.10	45.122	194256	3	0.0724091	185922	186105
ARS313.11	45.122	194256	3	0.0724091	186263	186322
ARS313.12	45.122	194256	3	0.0724091	186609	186663
ARS313.13	45.122	194256	3	0.0724091	187545	187945
ARS313.14	45.122	194256	3	0.0724091	188129	188529
ARS313.15	45.122	194256	3	0.0724091	188646	189046
ARS313.16	45.122	194256	3	0.0724091	189247	189277
ARS313.17	45.122	194256	3	0.0724091	189577	189647
ARS313.18	45.122	194256	3	0.0724091	189830	189977
ARS313.19	45.122	194256	3	0.0724091	190538	190938
ARS313.20	45.122	194256	3	0.0724091	191124	191524
ARS313.21	45.122	194256	3	0.0724091	191855	192255
ARS313.22	45.122	194256	3	0.0724091	193278	193678
ARS313.23	45.122	194256	3	0.0724091	193789	194189
ARS313.24	45.122	194256	3	0.0724091	194256	194656
ARS313.25	45.122	194256	3	0.0724091	194723	194932
ARS313.26	45.122	194256	3	0.0724091	195109	195123
ARS314.0	62.0901	197369	3	0.0786071	195945	196345
ARS314.1	62.0901	197369	3	0.0786071	196902	197302
ARS314.2	62.0901	197369	3	0.0786071	197735	198135
ARS314.3	62.0901	197369	3	0.0786071	198278	198312
ARS314.4	62.0901	197369	3	0.0786071	198565	198678
ARS314.5	62.0901	197369	3	0.0786071	201257	201657
ARS314.5.0	41.3193	203876	3	0.135593	201511	201911
ARS314.5.1	41.3193	203876	3	0.135593	202109	202217
ARS314.5.2	41.3193	203876	3	0.135593	203022	203422
ARS314.5.3	41.3193	203876	3	0.135593	203523	203923
ARS314.5.4	41.3193	203876	3	0.135593	204305	204705
ARS314.5.5	41.3193	203876	3	0.135593	205302	205702
ARS314.5.6	41.3193	203876	3	0.135593	206156	206556
ARS314.5.7	41.3193	203876	3	0.135593	206865	206955
ARS314.5.8	41.3193	203876	3	0.135593	207176	207265
ARS314.5.9	41.3193	203876	3	0.135593	207317	207576
ARS314.5.10	41.3193	203876	3	0.135593	207856	207959
ARS314.5.11	41.3193	203876	3	0.135593	208231	208256
ARS314.5.12	41.3193	203876	3	0.135593	208368	208631
ARS314.5.13	41.3193	203876	3	0.135593	209377	209777
ARS314.5.14	41.3193	203876	3	0.135593	210004	210404
ARS314.5.15	41.3193	203876	3	0.135593	211124	211524
ARS314.5.16	41.3193	203876	3	0.135593	211809	212209
ARS314.5.17	41.3193	203876	3	0.135593	212456	212856
ARS314.5.18	41.3193	203876	3	0.135593	213167	213567
ARS314.5.19	41.3193	203876	3	0.135593	213599	213737
ARS314.5.20	41.3193	203876	3	0.135593	214028	214428
ARS314.5.21	41.3193	203876	3	0.135593	214510	214695
ARS314.5.22	41.3193	203876	3	0.135593	214913	215313
ARS315.0	29.9349	224807	3	0.127645	215428	215828
ARS315.1	29.9349	224807	3	0.127645	216313	216713
ARS315.2	29.9349	224807	3	0.127645	216892	217292
ARS315.3	29.9349	224807	3	0.127645	217536	217936
ARS315.4	29.9349	224807	3	0.127645	219006	219406
ARS315.5	29.9349	224807	3	0.127645	219835	220235
ARS315.6	29.9349	224807	3	0.127645	220629	221029
ARS315.7	29.9349	224807	3	0.127645	221119	221519
ARS315.8	29.9349	224807	3	0.127645	221685	222085
ARS315.9	29.9349	224807	3	0.127645	222196	222294
ARS315.10	29.9349	224807	3	0.127645	222693	223093
ARS315.11	29.9349	224807	3	0.127645	223442	223480
ARS315.12	29.9349	224807	3	0.127645	223604	223842
ARS315.13	29.9349	224807	3	0.127645	223953	224004
ARS315.14	29.9349	224807	3	0.127645	224131	224353
ARS315.15	29.9349	224807	3	0.127645	224539	224939
ARS315.16	29.9349	224807	3	0.127645	225094	225494
ARS315.17	29.9349	224807	3	0.127645	225501	225867
ARS315.18	29.9349	224807	3	0.127645	225986	225992
ARS315.19	29.9349	224807	3	0.127645	226303	226386
ARS315.20	29.9349	224807	3	0.127645	226412	226703
ARS315.21	29.9349	224807	3	0.127645	226809	226812
ARS315.22	29.9349	224807	3	0.127645	226941	226994
ARS315.23	29.9349	224807	3	0.127645	228054	228454
ARS315.24	29.9349	224807	3	0.127645	228605	228622
ARS315.25	29.9349	224807	3	0.127645	228635	229005
ARS315.26	29.9349	224807	3	0.127645	229924	230324
ARS315.27	29.9349	224807	3	0.127645	230804	231204
ARS315.28	29.9349	224807	3	0.127645	231420	231820
ARS315.29	29.9349	224807	3	0.127645	232227	232627
ARS315.30	29.9349	224807	3	0.127645	232713	233113
ARS315.31	29.9349	224807	3	0.127645	233484	233884
ARS315.32	29.9349	224807	3	0.127645	234160	234560
ARS315.33	29.9349	224807	3	0.127645	234966	235366
ARS315.34	29.9349	224807	3	0.127645	235397	235797
ARS315.35	29.9349	224807	3	0.127645	235997	236397
ARS315.36	29.9349	224807	3	0.127645	237172	237572
ARS315.37	29.9349	224807	3	0.127645	237665	237925
ARS315.38	29.9349	224807	3	0.127645	238403	238803
ARS315.39	29.9349	224807	3	0.127645	238877	239277
ARS315.40	29.9349	224807	3	0.127645	239437	239589
ARS315.41	29.9349	224807	3	0.127645	239851	240251
ARS315.42	29.9349	224807	3	0.127645	240281	240681
ARS315.43	29.9349	224807	3	0.127645	240906	241306
ARS315.44	29.9349	224807	3	0.127645	241528	241928
ARS315.45	29.9349	224807	3	0.127645	242095	242495
ARS315.46	29.9349	224807	3	0.127645	242704	243104
ARS315.47	29.9349	224807	3	0.127645	243115	243515
ARS315.48	29.9349	224807	3	0.127645	244186	244586
ARS315.49	29.9349	224807	3	0.127645	244809	244861
ARS315.50	29.9349	224807	3	0.127645	245227	245627
ARS315.51	29.9349	224807	3	0.127645	245967	246367
ARS315.52	29.9349	224807	3	0.127645	247091	247491
ARS315.53	29.9349	224807	3	0.127645	247580	247632
ARS315.54	29.9349	224807	3	0.127645	248295	248695
ARS316.0	38.4064	272844	3	0.0750503	248956	249356
ARS316.1	38.4064	272844	3	0.0750503	249434	249671
ARS316.2	38.4064	272844	3	0.0750503	249913	250011
ARS316.3	38.4064	272844	3	0.0750503	250400	250800
ARS316.4	38.4064	272844	3	0.0750503	251009	251409
ARS316.5	38.4064	272844	3	0.0750503	251557	251624
ARS316.6	38.4064	272844	3	0.0750503	252363	252763
ARS316.7	38.4064	272844	3	0.0750503	252810	253210
ARS316.8	38.4064	272844	3	0.0750503	253262	253351
ARS316.9	38.4064	272844	3	0.0750503	253493	253662
ARS316.10	38.4064	272844	3	0.0750503	253768	253893
ARS316.11	38.4064	272844	3	0.0750503	253900	254168
ARS316.12	38.4064	272844	3	0.0750503	254309	254402
ARS316.13	38.4064	272844	3	0.0750503	254685	254709
ARS316.14	38.4064	272844	3	0.0750503	255202	255602
ARS316.15	38.4064	272844	3	0.0750503	256761	257161
ARS316.16	38.4064	272844	3	0.0750503	257438	257838
ARS316.17	38.4064	272844	3	0.0750503	258211	258611
ARS316.18	38.4064	272844	3	0.0750503	258818	259218
ARS316.19	38.4064	272844	3	0.0750503	259499	259519
ARS316.20	38.4064	272844	3	0.0750503	260070	260470
ARS316.21	38.4064	272844	3	0.0750503	260735	261135
ARS316.22	38.4064	272844	3	0.0750503	261746	262146
ARS316.23	38.4064	272844	3	0.0750503	262452	262852
ARS316.24	38.4064	272844	3	0.0750503	263474	263874
ARS316.25	38.4064	272844	3	0.0750503	264310	264710
ARS316.26	38.4064	272844	3	0.0750503	265022	265422
ARS316.27	38.4064	272844	3	0.0750503	265609	266009
ARS316.28	38.4064	272844	3	0.0750503	266519	266919
ARS316.29	38.4064	272844	3	0.0750503	267092	267492
ARS316.30	38.4064	272844	3	0.0750503	267672	267848
ARS316.31	38.4064	272844	3	0.0750503	268247	268647
ARS316.32	38.4064	272844	3	0.0750503	268860	268909
ARS316.33	38.4064	272844	3	0.0750503	269625	270025
ARS316.34	38.4064	272844	3	0.0750503	270119	270519
ARS316.35	38.4064	272844	3	0.0750503	270913	271313
ARS316.36	38.4064	272844	3	0.0750503	271326	271726
ARS316.37	38.4064	272844	3	0.0750503	272585	272985
ARS316.38	38.4064	272844	3	0.0750503	273060	273460
ARS316.39	38.4064	272844	3	0.0750503	273812	274212
ARS316.40	38.4064	272844	3	0.0750503	274344	274429
ARS316.41	38.4064	272844	3	0.0750503	274584	274744
ARS316.42	38.4064	272844	3	0.0750503	275091	275491
ARS316.43	38.4064	272844	3	0.0750503	275619	275805
ARS316.44	38.4064	272844	3	0.0750503	276115	276515
ARS316.45	38.4064	272844	3	0.0750503	277027	277427
ARS316.46	38.4064	272844	3	0.0750503	277552	277644
ARS316.47	38.4064	272844	3	0.0750503	278334	278734
ARS316.48	38.4064	272844	3	0.0750503	278946	279346
ARS316.49	38.4064	272844	3	0.0750503	279581	279981
ARS316.50	38.4064	272844	3	0.0750503	280066	280466
ARS316.51	38.4064	272844	3	0.0750503	280734	281134
ARS316.52	38.4064	272844	3	0.0750503	281465	281865
ARS316.53	38.4064	272844	3	0.0750503	282272	282672
ARS317.0	74.1163	292524	3	0.0887273	282830	283230
ARS317.1	74.1163	292524	3	0.0887273	283404	283804
ARS317.2	74.1163	292524	3	0.0887273	284006	284117
ARS317.3	74.1163	292524	3	0.0887273	284292	284406
ARS317.4	74.1163	292524	3	0.0887273	284613	284692
ARS317.5	74.1163	292524	3	0.0887273	285168	285568
ARS317.6	74.1163	292524	3	0.0887273	285633	286033
ARS317.7	74.1163	292524	3	0.0887273	286806	287206
ARS317.8	74.1163	292524	3	0.0887273	287440	287840
ARS317.9	74.1163	292524	3	0.0887273	288008	288408
ARS317.10	74.1163	292524	3	0.0887273	288776	289176
ARS317.11	74.1163	292524	3	0.0887273	289773	290173
ARS317.12	74.1163	292524	3	0.0887273	290577	290977
ARS317.13	74.1163	292524	3	0.0887273	291318	291718
ARS317.14	74.1163	292524	3	0.0887273	291971	292371
ARS318.0	68.2802	294396	3	0.0793043	293766	294166
ARS318.1	68.2802	294396	3	0.0793043	295035	295435
ARS318.2	68.2802	294396	3	0.0793043	295854	296254
ARS318.3	68.2802	294396	3	0.0793043	296477	296877
ARS318.4	68.2802	294396	3	0.0793043	296888	297288
ARS318.5	68.2802	294396	3	0.0793043	297553	297634
ARS318.6	68.2802	294396	3	0.0793043	298073	298473
ARS318.7	68.2802	294396	3	0.0793043	298655	299055
ARS318.8	68.2802	294396	3	0.0793043	299215	299615
ARS318.9	68.2802	294396	3	0.0793043	300036	300436
ARS318.10	68.2802	294396	3	0.0793043	300641	300781
ARS318.11	68.2802	294396	3	0.0793043	301342	301742
ARS318.12	68.2802	294396	3	0.0793043	302112	302512
ARS318.13	68.2802	294396	3	0.0793043	302880	303280
ARS318.14	68.2802	294396	3	0.0793043	303319	303719
ARS318.15	68.2802	294396	3	0.0793043	303795	304195
ARS318.16	68.2802	294396	3	0.0793043	304366	304766
ARS318.17	68.2802	294396	3	0.0793043	304976	305376
ARS319.0	58.1319	315346	3	0.068521	305385	305785
ARS319.1	58.1319	315346	3	0.068521	306820	307220
ARS319.2	58.1319	315346	3	0.068521	308033	308433
ARS319.3	58.1319	315346	3	0.068521	309066	309466
ARS319.4	58.1319	315346	3	0.068521	310457	310857
ARS319.5	58.1319	315346	3	0.068521	310870	311270
ARS319.6	58.1319	315346	3	0.068521	311531	311931
ARS319.7	58.1319	315346	3	0.068521	312210	312610
ARS319.8	58.1319	315346	3	0.068521	312873	312907
ARS319.9	58.1319	315346	3	0.068521	313481	313881
ARS319.10	58.1319	315346	3	0.068521	314124	314260
ARS400.0	0	137	4	0.2	137	537
ARS403.0	45.537	15492	4	0.373333	12535	12935
ARS403.1	45.537	15492	4	0.373333	16701	17101
ARS403.2	45.537	15492	4	0.373333	17719	18119
ARS403.3	45.537	15492	4	0.373333	18509	18909
ARS402.5.0	49.4852	21265	4	0.371795	19098	19498
ARS402.5.1	49.4852	21265	4	0.371795	19553	19953
ARS402.5.2	49.4852	21265	4	0.371795	20882	21282
ARS402.5.3	49.4852	21265	4	0.371795	21583	21983
ARS402.5.4	49.4852	21265	4	0.371795	22186	22338
ARS402.5.5	49.4852	21265	4	0.371795	22641	22734
ARS402.5.6	49.4852	21265	4	0.371795	22765	23041
ARS402.5.7	49.4852	21265	4	0.371795	23340	23740
ARS402.5.8	49.4852	21265	4	0.371795	23997	24397
ARS402.5.9	49.4852	21265	4	0.371795	24462	24862
ARS402.5.10	49.4852	21265	4	0.371795	24869	25269
ARS402.5.11	49.4852	21265	4	0.371795	25498	25557
ARS402.5.12	49.4852	21265	4	0.371795	26904	27304
ARS402.5.13	49.4852	21265	4	0.371795	28094	28494
ARS402.5.14	49.4852	21265	4	0.371795	28633	28686
ARS402.5.15	49.4852	21265	4	0.371795	29341	29741
ARS402.5.16	49.4852	21265	4	0.371795	29878	30278
ARS402.5.17	49.4852	21265	4	0.371795	30593	30634
ARS402.5.18	49.4852	21265	4	0.371795	30948	30993
ARS402.5.19	49.4852	21265	4	0.371795	31197	31348
ARS402.5.20	49.4852	21265	4	0.371795	31558	31597
ARS402.5.21	49.4852	21265	4	0.371795	31958	31959
ARS402.5.22	49.4852	21265	4	0.371795	31959	32358
ARS402.5.23	49.4852	21265	4	0.371795	32518	32654
ARS402.5.24	49.4852	21265	4	0.371795	33038	33438
ARS402.5.25	49.4852	21265	4	0.371795	33602	34002
ARS404.0	36.7832	46181	4	0.285554	34226	34626
ARS404.1	36.7832	46181	4	0.285554	34888	34975
ARS404.2	36.7832	46181	4	0.285554	35632	36032
ARS404.3	36.7832	46181	4	0.285554	36350	36379
ARS404.4	36.7832	46181	4	0.285554	36713	36750
ARS404.5	36.7832	46181	4	0.285554	36865	37113
ARS404.6	36.7832	46181	4	0.285554	37382	37467
ARS404.7	36.7832	46181	4	0.285554	37978	38378
ARS404.8	36.7832	46181	4	0.285554	38442	38576
ARS404.9	36.7832	46181	4	0.285554	38925	39325
ARS404.10	36.7832	46181	4	0.285554	39499	39899
ARS404.11	36.7832	46181	4	0.285554	40432	40832
ARS404.12	36.7832	46181	4	0.285554	41030	41430
ARS404.13	36.7832	46181	4	0.285554	41437	41682
ARS404.14	36.7832	46181	4	0.285554	42045	42445
ARS404.15	36.7832	46181	4	0.285554	42662	43062
ARS404.16	36.7832	46181	4	0.285554	43315	43426
ARS404.17	36.7832	46181	4	0.285554	44163	44563
ARS404.18	36.7832	46181	4	0.285554	45304	45704
ARS404.19	36.7832	46181	4	0.285554	46265	46665
ARS404.20	36.7832	46181	4	0.285554	46811	46925
ARS404.21	36.7832	46181	4	0.285554	47248	47648
ARS404.22	36.7832	46181	4	0.285554	47740	47957
ARS404.23	36.7832	46181	4	0.285554	47990	48140
ARS404.24	36.7832	46181	4	0.285554	48481	48881
ARS404.25	36.7832	46181	4	0.285554	49015	49042
ARS404.26	36.7832	46181	4	0.285554	49159	49228
ARS404.27	36.7832	46181	4	0.285554	49464	49559
ARS404.28	36.7832	46181	4	0.285554	49859	49864
ARS404.29	36.7832	46181	4	0.285554	50189	50259
ARS404.30	36.7832	46181	4	0.285554	50718	51118
ARS404.31	36.7832	46181	4	0.285554	51151	51551
ARS404.32	36.7832	46181	4	0.285554	51645	51683
ARS404.33	36.7832	46181	4	0.285554	51919	52045
ARS404.34	36.7832	46181	4	0.285554	52876	53276
ARS404.35	36.7832	46181	4	0.285554	53972	54372
ARS404.36	36.7832	46181	4	0.285554	54415	54815
ARS404.37	36.7832	46181	4	0.285554	55190	55590
ARS404.38	36.7832	46181	4	0.285554	55688	56088
ARS404.39	36.7832	46181	4	0.285554	56613	57013
ARS404.40	36.7832	46181	4	0.285554	57310	57710
ARS404.41	36.7832	46181	4	0.285554	57843	58016
ARS404.42	36.7832	46181	4	0.285554	58539	58939
ARS404.43	36.7832	46181	4	0.285554	59260	59660
ARS404.44	36.7832	46181	4	0.285554	59738	60138
ARS404.45	36.7832	46181	4	0.285554	60868	61268
ARS404.46	36.7832	46181	4	0.285554	61316	61501
ARS404.47	36.7832	46181	4	0.285554	62377	62777
ARS404.48	36.7832	46181	4	0.285554	62945	63025
ARS404.49	36.7832	46181	4	0.285554	63478	63878
ARS404.50	36.7832	46181	4	0.285554	63887	63894
ARS404.51	36.7832	46181	4	0.285554	64766	65166
ARS404.52	36.7832	46181	4	0.285554	65235	65635
ARS404.53	36.7832	46181	4	0.285554	65669	66069
ARS405.0	35.1699	85945	4	0.261948	66089	66489
ARS405.1	35.1699	85945	4	0.261948	66585	66669
ARS405.2	35.1699	85945	4	0.261948	67064	67464
ARS405.3	35.1699	85945	4	0.261948	68004	68404
ARS405.4	35.1699	85945	4	0.261948	68893	69293
ARS405.5	35.1699	85945	4	0.261948	69750	70150
ARS405.6	35.1699	85945	4	0.261948	70424	70824
ARS405.7	35.1699	85945	4	0.261948	71032	71432
ARS405.8	35.1699	85945	4	0.261948	71755	72155
ARS405.9	35.1699	85945	4	0.261948	72695	73095
ARS405.10	35.1699	85945	4	0.261948	73696	74096
ARS405.11	35.1699	85945	4	0.261948	74357	74428
ARS405.12	35.1699	85945	4	0.261948	74476	74757
ARS405.13	35.1699	85945	4	0.261948	74948	75036
ARS405.14	35.1699	85945	4	0.261948	75702	76102
ARS405.15	35.1699	85945	4	0.261948	76255	76655
ARS405.16	35.1699	85945	4	0.261948	77656	78056
ARS405.17	35.1699	85945	4	0.261948	78084	78484
ARS405.18	35.1699	85945	4	0.261948	78535	78935
ARS405.19	35.1699	85945	4	0.261948	79379	79779
ARS405.20	35.1699	85945	4	0.261948	79873	80273
ARS405.21	35.1699	85945	4	0.261948	80809	81209
ARS405.22	35.1699	85945	4	0.261948	81898	82298
ARS405.23	35.1699	85945	4	0.261948	82691	83091
ARS405.24	35.1699	85945	4	0.261948	83340	83740
ARS405.25	35.1699	85945	4	0.261948	83897	83952
ARS405.26	35.1699	85945	4	0.261948	84241	84297
ARS405.27	35.1699	85945	4	0.261948	84669	85069
ARS405.28	35.1699	85945	4	0.261948	85515	85915
ARS405.29	35.1699	85945	4	0.261948	86335	86735
ARS405.30	35.1699	85945	4	0.261948	86831	86896
ARS405.31	35.1699	85945	4	0.261948	86978	87231
ARS405.32	35.1699	85945	4	0.261948	87478	87554
ARS405.33	35.1699	85945	4	0.261948	88375	88775
ARS405.34	35.1699	85945	4	0.261948	88953	89353
ARS405.35	35.1699	85945	4	0.261948	89621	90021
ARS405.36	35.1699	85945	4	0.261948	90362	90762
ARS405.37	35.1699	85945	4	0.261948	90843	91243
ARS405.38	35.1699	85945	4	0.261948	91513	91558
ARS405.39	35.1699	85945	4	0.261948	91840	91913
ARS405.40	35.1699	85945	4	0.261948	92711	93111
ARS405.41	35.1699	85945	4	0.261948	93139	93539
ARS405.5.0	43.4674	100380	4	0.389721	94117	94517
ARS405.5.1	43.4674	100380	4	0.389721	94624	94844
ARS405.5.2	43.4674	100380	4	0.389721	95065	95465
ARS405.5.3	43.4674	100380	4	0.389721	95573	95973
ARS405.5.4	43.4674	100380	4	0.389721	96198	96598
ARS405.5.5	43.4674	100380	4	0.389721	96685	96833
ARS405.5.6	43.4674	100380	4	0.389721	97164	97564
ARS405.5.7	43.4674	100380	4	0.389721	97684	98084
ARS405.5.8	43.4674	100380	4	0.389721	98413	98813
ARS405.5.9	43.4674	100380	4	0.389721	98995	99178
ARS405.5.10	43.4674	100380	4	0.389721	99473	99873
ARS405.5.11	43.4674	100380	4	0.389721	100121	100521
ARS405.5.12	43.4674	100380	4	0.389721	100576	100976
ARS405.5.13	43.4674	100380	4	0.389721	101253	101653
ARS405.5.14	43.4674	100380	4	0.389721	101758	101982
ARS405.5.15	43.4674	100380	4	0.389721	102424	102824
ARS405.5.16	43.4674	100380	4	0.389721	103127	103527
ARS405.5.17	43.4674	100380	4	0.389721	103899	104299
ARS405.5.18	43.4674	100380	4	0.389721	104842	105242
ARS405.5.19	43.4674	100380	4	0.389721	105709	106109
ARS405.5.20	43.4674	100380	4	0.389721	106428	106828
ARS405.5.21	43.4674	100380	4	0.389721	107040	107085
ARS405.5.22	43.4674	100380	4	0.389721	107402	107440
ARS405.5.23	43.4674	100380	4	0.389721	107816	108216
ARS405.5.24	43.4674	100380	4	0.389721	108335	108456
ARS405.5.25	43.4674	100380	4	0.389721	109001	109401
ARS405.5.26	43.4674	100380	4	0.389721	109600	110000
ARS405.5.27	43.4674	100380	4	0.389721	110307	110391
ARS405.5.28	43.4674	100380	4	0.389721	110503	110707
ARS405.5.29	43.4674	100380	4	0.389721	110832	110903
ARS405.5.30	43.4674	100380	4	0.389721	111331	111731
ARS405.5.31	43.4674	100380	4	0.389721	111841	112073
ARS406.0	35.7881	123617	4	0.37884	112327	112727
ARS406.1	35.7881	123617	4	0.37884	112959	113359
ARS406.2	35.7881	123617	4	0.37884	113581	113981
ARS406.3	35.7881	123617	4	0.37884	114270	114280
ARS406.4	35.7881	123617	4	0.37884	114729	115129
ARS406.5	35.7881	123617	4	0.37884	115495	115895
ARS406.6	35.7881	123617	4	0.37884	116344	116744
ARS406.7	35.7881	123617	4	0.37884	117089	117489
ARS406.8	35.7881	123617	4	0.37884	118812	119212
ARS406.9	35.7881	123617	4	0.37884	119274	119674
ARS406.10	35.7881	123617	4	0.37884	119871	120271
ARS406.11	35.7881	123617	4	0.37884	120630	121030
ARS406.12	35.7881	123617	4	0.37884	121063	121463
ARS406.13	35.7881	123617	4	0.37884	122148	122548
ARS406.14	35.7881	123617	4	0.37884	122765	122851
ARS406.15	35.7881	123617	4	0.37884	123064	123165
ARS406.16	35.7881	123617	4	0.37884	123247	123464
ARS406.17	35.7881	123617	4	0.37884	123897	124297
ARS406.18	35.7881	123617	4	0.37884	125051	125451
ARS406.19	35.7881	123617	4	0.37884	125572	125697
ARS406.20	35.7881	123617	4	0.37884	126183	126583
ARS406.21	35.7881	123617	4	0.37884	126757	127157
ARS406.22	35.7881	123617	4	0.37884	127201	127380
ARS406.23	35.7881	123617	4	0.37884	127708	128108
ARS406.24	35.7881	123617	4	0.37884	128572	128972
ARS406.25	35.7881	123617	4	0.37884	129081	129173
ARS406.26	35.7881	123617	4	0.37884	129714	130114
ARS407.0	49.5376	137445	4	0.416947	130857	131257
ARS407.1	49.5376	137445	4	0.416947	131582	131982
ARS407.2	49.5376	137445	4	0.416947	132455	132855
ARS407.3	49.5376	137445	4	0.416947	133490	133890
ARS407.4	49.5376	137445	4	0.416947	134609	135009
ARS407.5	49.5376	137445	4	0.416947	135161	135364
ARS407.6	49.5376	137445	4	0.416947	135429	135561
ARS407.7	49.5376	137445	4	0.416947	135703	135829
ARS407.8	49.5376	137445	4	0.416947	135894	136103
ARS407.9	49.5376	137445	4	0.416947	136198	136294
ARS407.10	49.5376	137445	4	0.416947	136526	136598
ARS407.11	49.5376	137445	4	0.416947	137201	137601
ARS407.12	49.5376	137445	4	0.416947	137713	138113
ARS407.13	49.5376	137445	4	0.416947	138212	138421
ARS407.14	49.5376	137445	4	0.416947	138501	138612
ARS407.15	49.5376	137445	4	0.416947	138891	138901
ARS407.16	49.5376	137445	4	0.416947	139065	139291
ARS407.17	49.5376	137445	4	0.416947	139777	140177
ARS407.18	49.5376	137445	4	0.416947	140575	140975
ARS407.19	49.5376	137445	4	0.416947	141285	141685
ARS407.20	49.5376	137445	4	0.416947	141947	142347
ARS407.21	49.5376	137445	4	0.416947	142875	143275
ARS407.22	49.5376	137445	4	0.416947	143652	144052
ARS407.23	49.5376	137445	4	0.416947	144705	145105
ARS407.24	49.5376	137445	4	0.416947	145354	145754
ARS407.25	49.5376	137445	4	0.416947	146037	146437
ARS407.26	49.5376	137445	4	0.416947	146795	147195
ARS407.27	49.5376	137445	4	0.416947	147335	147735
ARS408.0	46.469	157744	4	0.278515	147868	148268
ARS408.1	46.469	157744	4	0.278515	148321	148526
ARS408.2	46.469	157744	4	0.278515	148683	148721
ARS408.3	46.469	157744	4	0.278515	149635	150035
ARS408.4	46.469	157744	4	0.278515	150169	150569
ARS408.5	46.469	157744	4	0.278515	151225	151625
ARS408.6	46.469	157744	4	0.278515	151962	152362
ARS408.7	46.469	157744	4	0.278515	152467	152867
ARS408.8	46.469	157744	4	0.278515	152960	153360
ARS408.9	46.469	157744	4	0.278515	153481	153881
ARS408.10	46.469	157744	4	0.278515	154380	154780
ARS408.11	46.469	157744	4	0.278515	154821	155221
ARS408.12	46.469	157744	4	0.278515	155355	155755
ARS408.13	46.469	157744	4	0.278515	155767	156167
ARS408.14	46.469	157744	4	0.278515	156264	156664
ARS408.15	46.469	157744	4	0.278515	156988	157388
ARS408.16	46.469	157744	4	0.278515	158101	158501
ARS408.17	46.469	157744	4	0.278515	159062	159462
ARS408.18	46.469	157744	4	0.278515	159817	160217
ARS408.19	46.469	157744	4	0.278515	160654	161054
ARS408.20	46.469	157744	4	0.278515	161188	161588
ARS408.21	46.469	157744	4	0.278515	162316	162716
ARS408.22	46.469	157744	4	0.278515	162764	163164
ARS408.23	46.469	157744	4	0.278515	163684	164084
ARS408.24	46.469	157744	4	0.278515	164684	165084
ARS408.25	46.469	157744	4	0.278515	165196	165334
ARS408.26	46.469	157744	4	0.278515	165671	166071
ARS408.27	46.469	157744	4	0.278515	166156	166556
ARS408.28	46.469	157744	4	0.278515	166783	167183
ARS408.29	46.469	157744	4	0.278515	167393	167583
ARS408.30	46.469	157744	4	0.278515	167634	167793
ARS408.31	46.469	157744	4	0.278515	168009	168034
ARS408.32	46.469	157744	4	0.278515	168532	168932
ARS408.33	46.469	157744	4	0.278515	169173	169573
ARS408.34	46.469	157744	4	0.278515	169920	170320
ARS408.35	46.469	157744	4	0.278515	170375	170775
ARS408.36	46.469	157744	4	0.278515	171296	171696
ARS408.37	46.469	157744	4	0.278515	171946	172346
ARS408.38	46.469	157744	4	0.278515	172422	172822
ARS408.39	46.469	157744	4	0.278515	173064	173464
ARS408.40	46.469	157744	4	0.278515	173587	173770
ARS408.41	46.469	157744	4	0.278515	173886	173987
ARS408.42	46.469	157744	4	0.278515	174488	174888
ARS408.43	46.469	157744	4	0.278515	175113	175234
ARS408.44	46.469	157744	4	0.278515	176078	176478
ARS408.45	46.469	157744	4	0.278515	176774	177174
ARS408.46	46.469	157744	4	0.278515	177469	177869
ARS408.47	46.469	157744	4	0.278515	178723	179123
ARS408.48	46.469	157744	4	0.278515	179261	179661
ARS408.49	46.469	157744	4	0.278515	179765	180165
ARS408.50	46.469	157744	4	0.278515	180490	180561
ARS408.51	46.469	157744	4	0.278515	180811	180890
ARS408.52	46.469	157744	4	0.278515	181173	181211
ARS408.53	46.469	157744	4	0.278515	181654	182054
ARS408.54	46.469	157744	4	0.278515	182260	182660
ARS408.55	46.469	157744	4	0.278515	183385	183785
ARS408.56	46.469	157744	4	0.278515	183849	183949
ARS408.57	46.469	157744	4	0.278515	184459	184859
ARS408.58	46.469	157744	4	0.278515	185104	185504
ARS409.0	30.1602	212420	4	0.281016	185495	185895
ARS409.1	30.1602	212420	4	0.281016	186153	186553
ARS409.2	30.1602	212420	4	0.281016	187238	187638
ARS409.3	30.1602	212420	4	0.281016	187747	188147
ARS409.4	30.1602	212420	4	0.281016	188549	188949
ARS409.5	30.1602	212420	4	0.281016	189024	189424
ARS409.6	30.1602	212420	4	0.281016	190523	190923
ARS409.7	30.1602	212420	4	0.281016	191018	191418
ARS409.8	30.1602	212420	4	0.281016	191920	192320
ARS409.9	30.1602	212420	4	0.281016	193904	194304
ARS409.10	30.1602	212420	4	0.281016	194510	194910
ARS409.11	30.1602	212420	4	0.281016	195515	195915
ARS409.12	30.1602	212420	4	0.281016	196492	196892
ARS409.13	30.1602	212420	4	0.281016	197493	197893
ARS409.14	30.1602	212420	4	0.281016	198011	198100
ARS409.15	30.1602	212420	4	0.281016	198356	198411
ARS409.16	30.1602	212420	4	0.281016	198766	199166
ARS409.17	30.1602	212420	4	0.281016	199212	199322
ARS409.18	30.1602	212420	4	0.281016	199651	200051
ARS409.19	30.1602	212420	4	0.281016	200235	200635
ARS409.20	30.1602	212420	4	0.281016	200795	200890
ARS409.21	30.1602	212420	4	0.281016	201069	201195
ARS409.22	30.1602	212420	4	0.281016	202031	202431
ARS409.23	30.1602	212420	4	0.281016	202520	202741
ARS409.24	30.1602	212420	4	0.281016	203087	203487
ARS409.25	30.1602	212420	4	0.281016	203576	203976
ARS409.26	30.1602	212420	4	0.281016	204411	204811
ARS409.27	30.1602	212420	4	0.281016	205101	205501
ARS409.28	30.1602	212420	4	0.281016	205640	205841
ARS409.29	30.1602	212420	4	0.281016	205949	206040
ARS409.30	30.1602	212420	4	0.281016	206347	206349
ARS409.31	30.1602	212420	4	0.281016	207064	207464
ARS409.32	30.1602	212420	4	0.281016	208160	208560
ARS409.33	30.1602	212420	4	0.281016	209082	209482
ARS409.34	30.1602	212420	4	0.281016	209682	210082
ARS409.35	30.1602	212420	4	0.281016	210154	210554
ARS409.36	30.1602	212420	4	0.281016	211020	211420
ARS409.37	30.1602	212420	4	0.281016	211571	211817
ARS409.38	30.1602	212420	4	0.281016	212226	212626
ARS409.39	30.1602	212420	4	0.281016	212654	213054
ARS409.40	30.1602	212420	4	0.281016	213372	213414
ARS409.41	30.1602	212420	4	0.281016	213534	213772
ARS409.42	30.1602	212420	4	0.281016	213851	213934
ARS409.43	30.1602	212420	4	0.281016	213967	214251
ARS409.44	30.1602	212420	4	0.281016	214428	214828
ARS409.45	30.1602	212420	4	0.281016	215316	215716
ARS409.46	30.1602	212420	4	0.281016	215868	215869
ARS409.47	30.1602	212420	4	0.281016	215869	216268
ARS409.48	30.1602	212420	4	0.281016	216546	216946
ARS409.49	30.1602	212420	4	0.281016	217754	218154
ARS409.50	30.1602	212420	4	0.281016	218681	219081
ARS409.51	30.1602	212420	4	0.281016	219658	220058
ARS409.52	30.1602	212420	4	0.281016	220142	220304
ARS409.53	30.1602	212420	4	0.281016	221063	221463
ARS409.54	30.1602	212420	4	0.281016	222242	222642
ARS409.3.0	46.4829	232140	4	0.391535	222422	222822
ARS409.3.1	46.4829	232140	4	0.391535	223024	223080
ARS409.3.2	46.4829	232140	4	0.391535	223289	223424
ARS409.3.3	46.4829	232140	4	0.391535	223543	223689
ARS409.3.4	46.4829	232140	4	0.391535	224398	224798
ARS409.3.5	46.4829	232140	4	0.391535	225022	225422
ARS409.3.6	46.4829	232140	4	0.391535	225574	225974
ARS409.3.7	46.4829	232140	4	0.391535	226051	226451
ARS409.3.8	46.4829	232140	4	0.391535	227402	227802
ARS409.3.9	46.4829	232140	4	0.391535	228429	228829
ARS409.3.10	46.4829	232140	4	0.391535	229155	229555
ARS409.3.11	46.4829	232140	4	0.391535	229991	230391
ARS409.3.12	46.4829	232140	4	0.391535	230856	231256
ARS409.3.13	46.4829	232140	4	0.391535	231482	231641
ARS409.3.14	46.4829	232140	4	0.391535	231704	231882
ARS409.3.15	46.4829	232140	4	0.391535	232556	232956
[truncated: 12,557 more rows]
