# Supplementary material for: The asymmetric distribution of RNA polymerase II and nucleosomes on replicated daughter genomes is caused by differences in replication timing between the lagging and the leading strand
Source: HighWire-hosted journal article supplement (doi:10.1101/gr.275387.121), 2022-01-18
Supplement: Supplemental_Table_S2.xlsx [file Supplemental_Table_S2.xlsx]

## Sheet: Table_S2_ACS_in_Replication_Ori
Supplemental Table S2: ACS locations within new ARS from Supplemental Table S1 (ARS). "NChAP peak" is the normalized read count of the NChAP fraction from the 54% unreplicated early-S-phase dataset from Figures 1B and 2. Only the ARS that have at least one ACS are shown in this table.
ARS sequence centered around NChAP peak	ARS	Chr	ARS start (bp)	ARS end (bp)	ARS replication timing (min) (Vasseur et al, 2016, W strand)	NChAP peak avg normalized to 1 per chromosome (ARS midpoint)	number of ACS per ARS	ACS sequence closest to NChAP peak	ACS strand, W-0 and C-1	ACS start coordinate (bp)
GTTGAAGACAAATTGCCTCTAATCAGTTCCATTAAGAAATCTTCTTAACTCCTCCAAATATTCTGCCCATACGATACCTATTTGTTTACTTTGTCATTTTGCCATAAGATTGGTATCCACTTCTTGTCTGTAAAATAATTAGAAAGTAGCACAATTTTTACAGTAATGTAGCACGCGTAACTCCTAAACTTTGTCATAATGGTTGAAATGAATGTATGATATAAAAACTCGGACCCTGTTTTACTTCTTTTATAGAACCTTATTTTTGACGCAGGGAGGCGACATTTATCCAAATTAAGTTTTGACATGGCGCATCAGGGAATAAAAAAAACTTTATTATGTGGCCGAATCAACATTAATCAAATGCACTAATATTGTAACGTTCTTACAAAGGGCAGA…	ARS102.5.0	1	5200	5600	59.3	0.01	2	AATTAAGTTTT	0	5593
ATGTTCGATATATTAGCAAATAGCGTATTAATATACAGCTGTTGCGCTCATGGTAAAATTTAGCGATATACTTTGCATCTTGGCTGCAAAGAAGAATGAATCGGATATACTATTTTTGATCATAATGACGGACATCATGATATAATAACGTTATACGGATAACTTTATTTCAAAAGCACCATCATGTTATCTCTTGTAAAAAGAAGTATTCTTCATTCAATACCAATTACTCGTCACATTCTTCCAATCCAATTAATATTGGTTAAAATGAACCATGTGCAAATCAGAAACATAAAATTATATCACTTTATTTCATATGGTTTCATGCTTACAAAGCTTACTGTCTTTCTCTTTAACTTATTTTTCTACAGGCTACGAATTCTTTGCAGGCTTACTTTA…	ARS103.0	1	10000	10400	64.94	0.02	1	TAAAATTATAT	1	10199
CTATCTGTGTATGTAGTAGTGTAATCTACTTTTAATTTACTATGCAAATAGGGTTCAGCATTACGGAAGAAACTGAAATCCCTTCCGCGGAAGTTTCTTAGTAGTGGCCGTGCGGGGTGAGGAGATTACATGTCGGTAATTAGATGATTAACCTAGGCAATTTGAAGGGGGATAGTGGCATTGGTTAGCTCAGATATGATAAGGAGAACTAAGCAAGGGGGTTAACCACCACGGCTGTAGCACAAGACCGGCAGATGCGATTATTAGCAACACATTAGTTAATGCTTTTGATAAAATGTATATAAAGGCTGTCGTAATGTGCAGTAGTAAGGACCTGACTGTGTTTGTGGTTCTCTTCATTCTTGAACCTTGTCATTGGTAAAAGACCATCGTCAAGAT…	ARS104.0	1	32800	33200	37.5	0.22	1	AAAATGTATAT	1	33262
GACATGAGACTATTGAACAACTTAAAAAACCATTTTGTTTTAAAACCGTCATATATATCACAGGATCGCGTTGTTAGTCCTAAACCGGTTTTCCCCATGATGGTTCATGGCACGCATCAAGATCTTTTCAATAGTGGCTCTGCGGCACAAGAATCGCCCAAAGCTGGTGCCTCGGCCAGCAGCGCAAGTGCTGCGAGCTTTGATCCCGATATGGACGATAATTTGGAAAATTATATAATCAATCCAGGGAGAAAATCGTCATCTATTCCAATGACTGCGATAGGGAGACAGAGATTAATTTTAAGCCAAGAGAAGCCAGTAGGTAAAACTGTTGTATTGCATGGTGGGTCTAACGGTCTCAACGTTCTTGATGATATGTGGTTGATGGACTTAGAGTGT…	ARS105.0	1	41200	41600	39.05	0.19	1	GATTAATTTTA	0	41293
TGCAGAGGAGTTAAACCGAATGAGGAAATGCAATGGATACGTTAAATTGGAGATGTGAGATTGCGACTGGGACTCGGATGGATGCTTGCTTTTGGATGCTAGTACAGAGAAAAAAGAGGGAGAAAAGAAAAGAGAAATAGAAAAAGGTTGGTTTAAGTCGGCAGAGGAGACTACTCGGGCAATTCGTTTCCTAATGGGTATAGTCCTCTTTCCTCAGAAATCCATTTGACTGGCAGACTCAGTAGTAGAAGAAAAAATCAAGAAAGAAATTGTGTGAAAGTATACTACACAAGAAAATGTTTAAGAAGAAGATTAAAAGCTCGAGGAAAGTACAGATATACAAATTATAAATAGGTAGGAGGAAGAAAAAAAAAAGATGAGGGCAAAAACCCAAGGCCA…	ARS106.1	1	67600	68000	38.12	0.36	2	GAAAATGTTTA	0	67902
GCTCAATAACGAGATTAGCGACCTCGAAGGCCTGCGCAAATATTTCCACTCCTTCCCGGGTGCTCCTGAGTTGAACCCGCTTAGAGACTCCGAAATCAACGACGACTTCCACCAGTGGGCCCAGTGTGACCGCCACACTGGACCCCATACCACTTCTTTTTGTTATTCTTAAATATGTTGTAACGCTATGTAATTCCACCCTTCATTACTAATAATTAGCCATTCACGTGATCTCAGCCAGTTGTGGCGCCACACTTTTTTTTCCATAAAAATCCTCGAGGAAAAGAAAAGAAAAAAATATTTCAGTTATTTAAAGCATAAGATGCCAGGTAGATGGAACTTGTGCCGTGCCAGATTGAATTTTGAAAGTACAATTGAGGCCTATACACATAGACATTT…	ARS107.4	1	130400	130800	27.08	0.18	1	AAAAAATATTT	1	130652
AACGCTAAGAAGGCTGCTAAGCCAGCTAAGCCAGCTGCTAAGTCCATTGTCACTCTAGATGTCAAGCCATGGGATGATGAAACCAATTTGGAAGAAATGGTTGCTAACGTCAAGGCCATCGAAATGGAAGGTTTGACCTGGGGTGCTCACCAATTTATCCCAATTGGTTTCGGTATCAAGAAGTTGCAAATTAACTGTGTTGTCGAAGATGACAAGGTTTCCTTGGATGACTTGCAACAAAGCATTGAAGAAGACGAAGACCACGTCCAATCTACCGATATTGCTGCTATGCAAAAATTATAAAAGGCTTTTTTATAAACTTTTTATAATTAACATTAAAGCAAAAACAACATTGTAAAGATTAACAAATAAATGAAAAAAACAACGAAATAACTTAGG…	ARS108.0	1	142800	143200	31.92	0.15	3	AAAAATTATAA	1	143150
CATATGTTCCGATGGTACTCATGTAGCTGCCTCATACGAGACCGGAAATATATGCATTTGGAACTTGAACGTAGGGTATAGAGTGAAACCCACTTCTGAACCAACAAATGGTATGACCCCAACGCCTGCCTTACCGGCAGTCTTACACATCGATGACCATGTGAACAAGGAAATCACAGGGTTAGACTTTTTTGGTGCTCGGCATACAGCCCTGATTGTTAGTGATAGGACAGGTAAAGTATCACTCTATAACGGTTACAGAAGAGGCTTTTGGCAGTTGGTGTATAATTCAAAAAAAATTTTAGATGTGAACTCTTCCAAGGAGAAATTAATAAGGTCAAAGTTGTCTCCACTAATATCACGGGAGAAAATTTCCACTAATTTGTTGAGTGTACTCAC…	ARS108.1	1	144000	144400	31.92	0.15	3	AAAAAAATTTT	0	144418
TCAACAGTATAGAAAATTTCTGAGTGAAGGGTGGTCTATACACACCGACGACTGCGAAATCTGCGGGAAAAAAATATGGGGAGCTGGTCTGGACCCATTACTTTTTCTAGCTTGGGAAAATGTACAGCGCCACCAAGATATGATTAGTGTAGATCTCAAAACTCCCCTTGTCATATTCAAATGTCACCATGGCTTTCACCAGACTTGCCTCGAAAACTTGGCCCAGAAACCCGATGAATATTCTTGTTTAATTTGCCAGACGGAATCTAACCCAAAAATAGTATAACATTTCTAAATATTTAATACAACTTTGGTTACATAAAAGTAAAATTTATACACCTCATTTCATTATGTAGATTCATATATAGAATACCAATTATGATTGACCCAATAGCCATC…	ARS108.2	1	147200	147600	31.92	0.15	4	TAAATATTTAA	1	147538
GCCCAGTTACCTGCGCCAAATCCATAGTATTGATCCCTTTTTCTCCTGATTTGGCAACTTCGAGAAGTAGTTCAAATGCAGAATTTCCAATAGTTGACTCCTTTTTTGTGTATCCCGTTAATAATGTCCATAGGCTGTCCTCAGTAATCCCAACCGAGTATGAATGATTAGCGTCGCCTATAATATCAGTCACATTTTTAGTTGTTATAGCACCATCACAATACACCTCAATGTCCTTTTTCAATATCACGCATGAAAGCACGAACTGTTTAACTTTTTTATCAGACAAATCAAAATATTTACCAGATATATCCCACAGCTGATTCAAAGTGATTTCTTCAATGTGTCGTTAGTAAATAATCTTTCACAATATAGTACGTTTATCACCTAAACGGAGCC…	ARS108.4	1	150800	151200	31.92	0.15	2	AAAATATTTAC	1	150963
TGGGTGAAGCCAGAAACGACATTGAGAATAAAGAAGAGGAGTATGATGAAACACATGAAACTAACATCTCCAATGCAAAGCTTGCAAACTTTTTTAGTAAAAAAGGTAATGAGCCTTTATCAGAAATTGAAATAGAGGGTGTGATGTCATTGTTACAAAAATCAAGCAAATCCATGATAACTTCGGAAGGAGAACAAAAATCAGCCGAAGGTAATAATATCGACCAGTCGCTTATCTTGAAGGAGTCAGGAAGTACACCAATCAGCATATCTAATGCGCCGACCTTCAACCCAAAATATGATACTTCAAATGCGTCAATGAATACGACTTTGGGAAGCATTGGTTCAAGAAAATACAGTTTCAATTATTCTAGCCTGCCCTCACCATACAAAACAACCG…	ARS108.5	1	152800	153200	31.92	0.15	1	AAAATATGATA	1	152832
CTAATTTTTACGCGTGACATTTTTCCAAGCAGAGATATTTTATTGAGCAGCGAAGAAGAGTTAGAGAATAAGAAAGTGATGCGATAAGAAATCCACCCAATTAGCATAGATCCTTTCGTATATGGCTGAAGAAGGTGGTACGCGCATAGCTATTAACATATATCAAAAAGAACGGCAAAAGGCGAGGAGGTTTTTATGCCACCGCTAGTATTTGACATAGATCACATCAAACTTCTAAGGAAATGGGGTATTTGTGGTGTGTTATCTGGAACTTTGCCTACTGCAGCACAGCAAAATGTATTTTTGTCGGTACCTTTGAGGCTTATGTTAGAAGATGTGCTGTGGCTGCATTTGAACAATCTTGCCGATGTGAAATTAATAAGACAAGAGGGAGATGAG…	ARS109.4	1	158800	159200	34.53	0.08	1	AAAATGTATTT	1	159062
CGCTGGAGTTCACAATAGTGGAAACGCCAAAATCAGCAAGTTTGACAGTGTTATCAGCACTCAGCAGGATGTTAGCCGCCTTGATGTCCCTGTGGATGACTCCTTCACCGTGTAAATATTTCAGCCCCAATAGTGTCTGTGTCACATAGGTTTTCGATTCATTTTCACTTAATCCGGTAGAGCTCCTTGAAATGAGCCTCCTCAAAGAACCATTAGCGCAGTATTCGAGGAGGATATACAATTCATAGCTTTTTCGTATGAAGCCGTGGTATTTAACAATATTGTTATGGTTTAAATTTTTTAACAAGCTAATTTCTGCCATAATGTCATTAAGTTCCTCATCATTTTCGTACACGACCTCCTTTATTGCCACGACTTGGTCAGTATGTTTATTAATGG…	ARS110.0	1	174800	175200	24.61	0.55	4	TAAATTTTTTA	1	174901
AACTCCACTACCCTGATCTGCAATCTTGTTCTTAGAAGTGACGCATACTCTATATGGCCCGACGCGACGCGCCAAAAAATGAAAAAAGAAGCAGCGACTCATTTTTATGGAAGGACAAAGTGCTGCGAAGTCATACGCTTCCAATTTCATTATTGTTTATTGGACATACTCTGTTAGCTTTATTACCGTCCACGCTTTTTCTACAATAGTGTAAAAGTTTCTTTCTTATGTTCATCGTATTCATAAAATGCTTCACGAACACCGTCATTGATCAAATAGGTTTATAATATTAATATACATTTATATAATCGGCGGTATTTATATCATCAAAAAAAGTAGTTTTTTATTTTATTTTTTCATTACTTTTCACTGTCTATGGATTTTCATTCGTAAAGGCAT…	ARS201.1	2	7200	7600	43.02	0.02	3	ATATACATTTA	0	7490
GATTGATAATGTAACAGGATACTGAATGACAAAGTATAAATGAAAAAAAAAAAAAAAAAAAAGTAGTAATACTATTATGTGGAAATACCGATTCCATTTTGAGGATTCCAATTGTTGGAATAAAAATCAACTATCATCTACTAACTAGTATTTACGTTACTAGTATATTATCATATACGGTGTTAGAAGATGACGCAAATGATGAGAAATAGTCATCTAAATTAGTGGAAGCTGAAACGCAAGGATTGATAATGTAATAGGATCAATGAATATTAACATATAAAACGATGATAATAATATTTATAGAATTGTGTAGAATTGCAGATTCCCTTTTATGGATTCCTAAATCCTGGAGGAGAACTTCTAGTATATCTACATACCTAATATTATAGCCTTAAT…	ARS201.2	2	8800	10000	43.02	0.02	2	AATAATATTTA	0	9271
GGTAACAAGCAAAAGTAAACTACAATATGGAATAGTGTAAAACTTCACTTATCAACAACAAAATCGCTTCAAGCCTCCTATCTTAGAGTCTAGAGCCTGATAAAATTCTTATGCGAGCAAGGGCAACCTGATCGAATTTTATAAAAACTATTTATGGACTAAAAACCTACAGCGCTCTTCATCATATCCCTTCCCGTTTCTTCCATTGCGTCATTCATGGTTTGTCCCATTGTGGTTGCATAGTCATTAATAGTGGTTTCTACCGTGTCTAAACGAGTTTCAATTGCCCTAGAAACACTTTTAAGGACACCATATCCATTACTTCTTCCAGAGCTTCTTACAGGTCTGGCATACCTGTGATCTTTCGTACCGGGAGGTAACTTTCTGGCTGCATTACTA…	ARS201.3	2	10800	12800	43.02	0.02	5	AAACACTTTTA	0	10979
CTTGCTCTTTTAAAATTTCTGGAGCCATAAATTCTGGTGTGCCACAAAATGTAGAAGTTCTATTACCATACCACATTTCATCTTTACACAAACCATAATCGGCAATTTTTATATGACCTTCTGGAGTTAATAGAATGTTTTCCAACTTCAAATCACGGTATATTACACCATTATCATGAAAATATTTCAGAGCCAGTAAGACCTCGGCGGCATAAAATTTGGCCCTTCTTACAGATAGTCTTTGGTTTTGAACATGCCACATTAAGTCACCGCCCCCAATAAACTCCATAGCAAAATATATACGGTTTTCAGTTTGAAAAGAGCAGTATAGATTGGTTAAGAATGGGTGTTTAGTTTTTGTGGCTAACAAAAATACTTTCTTTTCTGCTCTTGCACTCT…	ARS201.4	2	14800	16000	43.02	0.02	6	AAAATATATAC	1	14989
CGAAATCTAAATAATACGGATTATAAGGGTCTTTAGCAACGGGATCTGTTTGATCATACTCATATTCATAACCTTTACTAACAAATGTGACTCTTTCAGTAATACTGACATGAATACGTTTAACACAAACGTTTTTGCATATCGGTGCCAATTTTATCTTGATTGGGACTTCACTGTTTAGTGAAACGTATTTCTGAGCAAAGGAAATCTCGTATGACAAAGAATCTGTCCAAACCCTATTAATATAGATTGGTTTATTCGCAGTGGATACGGCAACGGGCGGTGGAGTTCTAATAACTTTTATTGGATACTCTGCGAAAATGTCCTCTTCTCCTGATTCTTCATTTTTCAGTTGATGTGAGCTCATGTGTAGATGATTTTTAACTTTACTAAACAAAG…	ARS201.5.1	2	26400	26800	42.5	0.07	2	AATAACTTTTA	0	26606
CGTTGTGTTGTTCAAGACGGCAGGTGAGTGAACATTAGCGCCACCAAGTAAAGATGATAGCGCGTGCCTAATGGTGGAGGATCTTCTTCGTTGTTGCATGGACCCTAATTTCTTGGTGGGAGAGGGTTGAAACGGCTGTCCTTTAGACTGGTTTAAATCTGTTTCTGATAAAGAGTGGGATGAATTTTTCGCCACCGGTCTTGATGTTATAAACGGCATGCCCAATAGGGGTAGGGAAAAATCTTGCTTGTTCTTCTCTATTTAAAAGAGTCACCTTTCCGATGGACCTTCAAAAATATAAACGTGGCTTATCTCAGAGCTAAGACAGACCTTCCGAGCAATAATAATGAGTCGTTCTATTTTTTTTTTCTCGTCCCTTTTTTTGTCCCCTCTTAACAA…	ARS201.5.2	2	28000	28400	42.5	0.07	1	AAAATATAAAC	1	28371
ACAACGGGTCGAAATTTGCCGTCACATTCAGAGCGAAGAGCGACAGGGGAATTGGTGGGCTAACCACCTGTTGAGCCCAGCTAGCAGCTGTCGGTAAACCGTCGTTGGGCGGGGCGCGACAATGCAGCCAGCGGAGGCATTGTATGGTTTCCGTCTGGAGAGTGGGCTTAGCCGGCCTGGCACTCCTTCTCTAAGCAGAGTGAGAAGGGAATCTTTTTACTGGAGAAGAGTGTTTGATTCCAGCAGAAGGTAATACGCACCTTTCTCATCTATTTGCAGAATCGTTTTATTAAAATACTTTTAAAGAATTTAGATTTTGATAATTAGTTCATTCTCTTTTACAAAGATAATCACCAAACAGGGACAATACACTGAACGATAAAAGTATGTGACATATAG…	ARS201.7.3	2	44800	46000	30.15	0.03	2	AAATACTTTTA	0	45548
TGAATAAGAACAACCCTGCAGAATCATTTAAGAGATTAAACAGGATCATGTTTGAGAACAATATTCCCGGAGATAAAAGAAGTCAACGGTTTTACATGAAGCCGGGGAAAGTGGCTGAATTGAAGAGATCTCAAAGGCATAGGAAGGAATTCATGATGGGCTTCAAGAGGTTGATTGAAATTGTTAAAGATGCCAAGAGGAAAGGATACTAATCGTACCATCAACTCTTGAATATTGTGAAATTTTCGCCATTGATTTCCGTCTTTGTAAATAGGTAATGCGTAACTATTTAGTTAAATTTTTGTATATTTTTTATTCTATGACTTCACTTATCCATTATTTCCATCGTCAAAAAAAGGAAATAAATACTGTTGCTCGAACGAACAGCAAGATAAAGTG…	ARS201.7.5	2	49200	51200	30.15	0.03	5	GTTAAATTTTT	0	49434
TGTGCTCGTGACATATGACTCCAATTCTGCTTTTTCTCCAAATACTCTCTTTTGCCCATTGTGCTGTAGCCGTCATCGCTTGGATTTGGAGGCCAACTACTTGCCTTGTTCCCAAGGTTATTGCCATAATTTGGATTGTAGTACTCTTCTTCCATTTCGTTCAATCTCAATGCCTGTAAATCGATTAAATTTATGCCCTTCTCGTTCTTAGCCCAACCGTTTCCGCCTTGTAAAATATCTTCCACGCATTCTCTTGGCGTAAATTCACCTGGTCGAGGATCCCACGGTAATTTAAACGTTTTCTGGTACAAGCTCTCAATCAGTGGGCTCATAGAGGAAGATATTGTTGTTGACAGCCCTGGCTTTGTTGTCATTTCGCTACTCTTGTGGTTGGTAGAA…	ARS202.0	2	61600	62000	27.98	0.16	3	TAAACGTTTTC	1	61655
GCGTCCCTGTCATTAGTTCATATGCCACACCAACGATACCTCTAAGCAAGGCACAGACGCTATTGGAAGAAGCTAGGTTACAAACCCAGTTAAGAGATGCTGAAGAGGAAGAGGGAAGAGATCAATTTGGATGGGATGACACCCAAAATAAAAGAAATTCTAATTATCCAATCGAACAAGATCAATTTGAGACCAGCGATTACCTGGAAAGTTCAGCATTTGAATACCCTGGTGGCAGACTTTGAGAACTGCAATCATTAGTTACTTCTTGACCAACTTAAACACCTTAATAATTAATATTTAATAGAACATAATATAGTGATATAAAGTATATAAAAATAAAAAGTTTACGAATTAATACAATCAAATTAGACACTGATACTATCAAGAAGTACATCG…	ARS202.2	2	66400	66800	27.98	0.16	1	ATTAATATTTA	0	66861
AAGCAAATGGCAAGTGTAATTTCCTATAACTTTAAGATAGGCCTGTAAATAACGTATATGAAACAGTTCCATCCCGTAACACCATGAACACTGCGTAAGAGAAAGCCCTCAAGCTTTCCCAGCGATGCTCGTGTGTAGGACCGAACATGGAGGGGGGAACTAGGCCCAGCACGGGTTTGGCGAGGCCGCTCTGCTCGCAGCTCAGGATTCTAAAAGGTTATTCCGCTGAGAAAATCAGAAAATAGGAACTTCTCACGCAATAATTTTAAAGTTGATGAAAAAGGAAAATTTGTAAAAGTGTAAGGGTGTTAAAGAGGGTGTATGGATGTAAAGTCACAAAAGTTAGAGCAGATGAAAAAGAAATGGGTGGAGACAAATCCGAAAAAGGACCTATATTAT…	ARS203.1	2	89600	90000	49.3	0.03	2	TAAAAGTGTAA	1	89773
ATACCCAATTTTCCATATGCAAGACAAGACAAGAAAGATAAATCCCGGGCGCCCATTACCGCAAAGTTGGTTGCCAATTTATTGCAAACTGCTGGTGCTGATCATGTCATCACAATGGATCTCCATGCCTCCCAAATTCAAGGGTTTTTCCATATCCCGGTTGACAACCTATATGCAGAACCAAGTGTTTTAAATTATATTAGAGCCCGGAAAACAGATTTCGACAATGCTATTTTGGTGTCGCCTGATGCAGGTGGTGCTAAGAGAGTAGCTGCTTTGGCTGACAAGTTAGATTTAAATTTTGCTTTGATTCACAAAGAGAGGCAAAAAGCTAACGAGGTTTCAAAAATGGTGCTTGTTGGTGATGTTACCAATAAATCATGTTTATTAGTTGATGAT…	ARS203.3	2	92800	93200	49.3	0.03	2	ATTTAAATTTT	0	93002
AACAACCAGCCAAACTTTTCATGTTTACATAGGGAAACATAATGGCCGTGTTGTGGCCCACCGCCCATATGAACGACAATCCCAGCCAATTCATACTTTTGACAAACCTTAGAATTTATTGAAGAGCAAACATTTAGCGTCAGAGGATAGTGAATGTTATTAAAAAGCTTAATATTACAGTTTTGTTTCTCAGAATACTTGAATCTTTTCAAGTGTAATGTTAAAGTATCAGGCAATTGCTTCAAACCAACTAATCTCTCTGCCTCCTGTAAACCGCAACATTCGTCACAATAAAACTTGTTTGAGCCATTTAGCATTTCTCGCTGGTGATAACTTTTCAAAATTTCCTGTATATCTGTTTCCTCATCTCCCTGAACTTCTATGGGGAAATCCAAAAAT…	ARS203.4	2	94000	94400	49.3	0.03	2	AAAACTTGTTT	1	94277
ATAAGCTGCTATTACTTTCTCCTTTCAAGTCCAGGTTATTACTATTACTGCTACCTCTTGAAGGATTTTCATAATTGAGAACTCTGCCAACAATTATTTTACGCGGAACATCCGGAGGTCTATCTGTGACGTTCTCGAAACTCAATCTGCTCGGAGCACCAGGCTCATTAGGTGTTTCGACTATCAATGGAGGTGCGTCTTGAGGACGAGAAGAGGGTTTTCCAGTGGTTAATATAGCAGGACTTCCTTCCTTTTTATTATTGTCTTGTACATGTTTCGCGCTAAAACTTTTAAAAAATTTACTCTTCTTCTCTGAAGGCCCAGCTGTATTTGAATTTACAGAATTTACAGGGGTAGGCTTTCCATCATCAACAGATTGAGGTTTAGGGTTAGGCAAAT…	ARS203.5	2	95200	95600	49.3	0.03	4	AAAAAATTTAC	1	95151
GCTGCAAATGGTGGTTGATTTGTTGTCGTTGTAACGGTGGTCGACGTAGTATGAGGGGAATATGTTTTTTGAATTGGAGAGAAGGGGCCGTTCGGAGTGTTACCTGCAGAGTTGTTCTTATAAAAAGCCATTTGCAAAGCAGGAGGTAAAGATTCTTTTGAATTATTAGGCAATGCTGAGTCATTTAGCAGCGGGGGCAGCTTATTTGGCTCTGTTGCAACCAAGCCTTTCGAATCTTGCGCTAAAGAAGATGCGCGCAACGTCATGTGAGAAGATGCTTCATTATTTGCTTTAAATTTATTCGTATTGCTGCCCTGATTTGCTTGTAAGAGTTGGGGTTCCCTGGACAAATAAGTTTGAACTGAAACCTTAGAATCTCGTTGAGCCGCGGAAGAAGTT…	ARS203.6	2	99200	99600	49.3	0.03	2	TAAATTTATTC	1	99512
CCCTTGTTTCGGCATTAGAAGAGGCATTTCGCACGTTTTACCGGGTCAGAAACTTCGAGGAAGCTGTGACAATTGGAAAAAAAGGCAAAACTAAATGCAATGTATCCGGTTGCCCATGCATTATTTGTGATGTTTTCGGATGTAGTTCGCTGCGCTCCGCGGCGATATATCCTCTAGCGAGAGGCATATGTATAAATATATATATATATATCTAACAAAAGCATTCAAGTTTCTTTCTCTGGTGTTACGTCTTTGTTCGACTTTCTCTGCTTACAGCCCTGTATGACCAAAGAAAAAATAAAAAGACAGCTACATACCAGCAGAAATTTTTTATAGTATTACACTATACATCCAAGTTTTTTCACAATTATTTATTGTTTTTCTCACATAGAAAATTCC…	ARS206.3	2	136400	136800	41.82	0.02	2	AAAAAATAAAA	1	136566
CCACTGGGAGGGAGTGGCAATACCGTCTAACCTCTCGCCTACGTTCTCATCGCTATGGGAATTGGGCAGGCCTGGTGGGACTGGCCCTTCTTTCTACACATTCCACATCGGTAGCTTGTTATACTCCTCGGGAGATTACTGTATCTACATCGGGATACTAATAGTACATTTATACGCTAGTGCTACTTGATAGATCTTTTCACCAAATCGAATAAAAAGTCACCAATAAATTAGAGGAAAATGTATGTTTAACAGTGATACTAAATTTTGAACCTTTCACAAGATTTATCTTTAAATATGTTATGAATGTCATCCTTTGGAGAGAAATAGATAAGGAAAAAAATTGAGGATACAGCATCCGGTGGTCGCATAGTTGGTAGCAACATCCATAGAAGAACC…	ARS207.2	2	168400	168800	39.64	0.05	3	TAAATATGTTA	1	168476
CTAAGGCTGATGCTCAACGTGAAAAGGCTTTGAACGAAGAAGCTGAAGCTAGAAGATTGAAGAACAGAGCTGCTCGTGACAGAAGAGCTCAAAGAGTTGCTGAAAAGAGAGACGCTTTGCTAAAGGAAGACGCTTAATTGATTACAAATAATTAGCTAAGAAATTACGTACCTTCTCATTGTTCTATATATGTTTTATTTTCTCTAAAATGTACCAAATACAATAATAGTTTCAAAGGAGCAGAGAAAGAAACTAAGGTGAAGGAGACTGTTCGTAGAATAAATGAATATTGATTAAAATTTTCTGAAAAAAAGAGTAATGAAGTCGTAGTCATCGCTAATGTACCGTAAGTGAGTTCTGAAAGGAGGCGGGTTCTTGTTTCAACGTAGCTTGTCTAGT…	ARS207.3	2	169600	170000	39.64	0.05	1	ATTAAAATTTT	0	169533
GCGCCTTTATTGATGTGTCAAGAAATGACCCTGCCAAAGAAAACTTATTCTTGCCTGTGTGGAAAGGCAACAAGTGTATCAATTTGATGGTTTGTAAAGAAGATACTCATGAGCTATTATATAGGATCTTTGGTATTGATGCGAATGCCAAGGCTACTCCAAGCGCTGAAGAAAAAGAAAAAGAAAAAGAAACGACTGAATCTCCCGCAGAAACTACTACCGGAACCTCTACTGAAGCTCCTAGCGCTGCTAATTGATAGTTATCATGTTTCTTATCCCCTCCACTGTAAAGTAAATGTATATTATTAAAAGGCAAAAATAAGAATATAATACTTCAGTAATGAGCCTTTTTTATTCGGTCTTGTTACTTCTTTTTTACTTCATTTTTTTTTTTTTTTT…	ARS207.1.0	2	174400	174800	39.49	0.03	4	TAAATGTATAT	1	174625
TAGATTTACCTATGGACGTTTTACCAACACCTGGGGGTCCTACGAAACATATGATTTTACCATCGACTTTACCCAATAGTTTACCGACGGCAATAAACTCCAAGATACGATCCTTGACATCTACCATACCATAATGATCTTCATCTAAAATTTTCTTTGCTCTCGGAATGGAATACTGTTCTTTGGAATGTTTTCCCCATGGGATCGATGTTAACCAATCCAAATAGTTTCTGATAACGCCAAATTCGGACATAGAAGTCTCCAAGGTACTTAATTTAGTTATCTCATCATCGAAAATTTTTTGAACGCTATCAGGCAATTTTAATGACTTGATTCTTTCTTTATAAGTGTCAATCAATTTGTCACGGCCGTCGTCAATACCTAATTCTCTTTTGATGC…	ARS207.1.2	2	179600	179600	39.49	0.03	1	GAAAATTTTTT	0	179636
CAACATCAAAAACAAATCGCTCGACTCATTTTTCCAGAAGGTAAATGGAGAAAAAGATGACAGGATTAAAGAATCCTCTGAAATTCCACAGCAAGCTAAAAAAAGAATCTCCACGCCAAAGTTGAATTTCAAGGATGTCTTTGGAAAGCCTCCCCTGTGCAGGCATGGGGAGGAATCCATGCTGAAAACATCGAAAACTTCGGCCAATCCAGGTAGAAAGTTCTGGATTTGCAAGAGATCTCGGGGTGATTCAAATAATACAGAATCATCTTGTGGGTTTTTTCAGTGGGTTTAAATATGAAAACGTCAGCTGATATTTTGGGAGAATAAAACACTTTCTTCTATGCCCAAGTTTTTTTAAATAATAAACTGATATTCTATATACATTTACAGTCTTGT…	ARS207.1.6	2	185600	186000	39.49	0.03	2	TAAATATGAAA	1	185914
GAAGAAGAGGAAGAAGAAGAAGAGGAAGAAGAAGAAGAAGGGAAAGAAGGAGATGCGTAGATGCCATTTACTGACGGTGAAGATACTAGAAACTAAATCTTTCGCCGTTCTATTTATGTAATAAACCCATTATTGCTCATTGGGAGTTGTAAATATTAATGCTCAATGTTTATGTATATCCCTCGCACAGGGGCTTTTTATTTCTTGAGGGGGGGACTAATTGTATAATTGTATGTTTTATAAAAAAGTATATTGCTCTTTTACGACTTTTGGTCTGGTCCCCTATGCTACTAATAACATTTTATTCTCTTCAAACTTCAACGTTCAACCTGCTTTGCCGAGACGGCGATTAGTATCCTACCCAACTGAACCTTTTCTTTTTGTTTCGCTTTTTGTTAT…	ARS207.8.0	2	206000	206400	40.06	0.04	3	AATAACATTTT	0	206051
ATCATCTGTGGTTGTTGCATAGCACCACCAGTATTGAAAGTAGTCATCATTTGGAGCTCTTGCATAACACCACCAGTATTGAAGGTATTCATCGTTTGTGGTTGCTGTTGTTGAAGAACGCCCCCTGTACTTAAAGTATTCATGGCTCCACCAGTGAACTGGTTCTGGTTTAATGGCGCAATACCTCCGGTTTTTTGTAAAGTCAAACCGAATTGGGATTGCGGCCGGAACCCGCCAGTGTTTTGAGCTTGAGAGCTGAACGAAGTCTGGGGAATCATGGCGCCTCCAGTATTAAATGTATTCAAAGCACCACCAGTTCTCTGCAAAGGCATCATTGCTCCCCCTGTAACTTGTGGTAAAGCATTGAAGGACGTTTGAGGCATCATTGCTCCTCCAGTA…	ARS207.8.3	2	213200	213600	40.06	0.04	1	TAAATGTATTC	1	213121
ACACCGTGCTCTGCTGCTTTCAGGTAAAGCCATTATTTCCACGACAACTGCATTTCACTTTTCATTTTCTTCCAGAACAACAGGCGCTGCCCTTGTTTCCGCGGAGCTGCCTCCTCTGCCGCTCGGACTTTCCGCGGAATAATAAATGAACTATCACAGTGAGTCTTAGAATGCAAATATGTAGATACTGTTATAGAATCTCATTAATGTATTTATGTATTTCCTGTGTTTGTGTCTTCAGGAGCCTTCCAAAGCAACCATAGGTCTTAGGCGACAACTGCATCAGCAGTTTTATTAATTTTTTCTTATTGCGTGACCGCAATGAAAGTGAAGAAATCAACTAGATCAAAAGTTTCGACAGCATGTGTCAATTGCAGAAAAAGGAAAATCAAATGCACA…	ARS207.8.5	2	217200	217600	40.06	0.04	4	TATTAATTTTT	0	217442
CCACCGCTTCGCCTAATAAAGCGGTGTTCTCAAAATTTCTCCCCGTTTTCAGGATCACGAGCGCCATCTAGTTCTGGTAAAATCGCGCTTACAAGAACAAAGAAAAGAAACATCGCGTAATGCAACAGTGAGACACTTGCCGTCATATATAAGGTTTTGGATCAGTAACCGTTATTTGAGCATAACACAGGTTTTTAAATATATTATTATATATCATGGTATATGTGTAAAATTTTTTTGCTGACTGGTTTTGTTTATTTATTTAGCTTTTTAAAAATTTTACTTTCTTCTTGTTAATTTTTTCTGATTGCTCTATACTCAAACCAACAACAACTTACTCTACAACTAATGTCCTCTGCCGCCGAAAAGAAACCAGCTTCCAAAGCTCCAGCTGAAAAG…	ARS208.1	2	236400	236800	29.43	0.13	10	GTTAATTTTTT	0	236437
TCTGTTATTGGTCCATAATAGACCTCTGCGTTGGAAAACGGGTCAAAATACTCATGCATAGAGGACAACCGCCGGTGATGTCTTCTACCACCTTGTTGCCCCTCTTCTTTCAACGGCCGCTGCTCTGAACCACTTGAAAGTGGCTTTATGTTATCTTCACCATCATTACCTTCGGATGGAGGATTTATTTCCGTTACTTTTGGTAAAAAATCTACCATTATTTGAGTATATGCAGGTCTCCTTATATACCAAATGTCTGATCCGAACCTGCGTCAAATATATTTGCAAAGGGAAAATATAAATAAATAAATAAAATTGAGAAATAAAGGATATTAGTTTTAATGGAAAACAGTTCCTACAAGCGCTATAACATATGAAATATACATTAGTCGAATATTA…	ARS208.3	2	241200	242400	29.43	0.13	2	AAAATATAAAT	1	241358
CGCCATTGGTACAAGAATGTTCATCAGAATCTGTTAATTCTTTAGAAAGACCTCCCGCTGCTGTAGTTCACCAAGCTAACTCTTTAGATACGGATTACGGTTTAACAAGGCCTAGCAATGGGCGCGTTCCAGCTGTAAGTGATACGGTGGAGCAATTGGAAAGGCTTCCGGGCGGGACTACAACGCAGGAAATTAACCCACCGGAGAGGGCAAAGGTAAATGCAAGGTCATGAACTGAATCTTTTTTTCCGGCTGTCCTCTTACAGTTGAGTTACAATATTTTGCCAGAAATATTTACATTTTTTTACCCAATCTCTATAATAATTATTTTAATTCCTAATCCGCTTCAGGCCCGCGGTCGTTGAAGTGCTATAGTTTATATTCAGTACATTGTCTTTA…	ARS208.5	2	246400	246800	29.43	0.13	2	ATTTACATTTT	0	246607
AAAAAAGAGTTGCTAAAGAAGAACTATTTTTGAATGTCCGTGGTAATACAATGGAAGACTACTAGAACACGATGGCAGATAAGGTGATTTGATAATCAAATTCAACGACGGTTGCACCGTTGTTCTTTCTGCCGCTCTTCGTCCGGAGCCTTCTGTGATAATTGTTTTAACGCGCAGAAACACACGCAGGCTGCGTAAAGGAATGGTGGGGCTCGAAGAAGTGACAGTGGGTGTCCACGGAATGTTCTGAGCGCAGGGATCCGGTGTTGCCATCGCACACGATATGAGACGCGTTCATTTTTTCCAGCAGTCACCTAAAAGTTCAAGAAACGCTATGTTGTAATGCAGCTGTATTGTACACTGGCTGGTATTGCCGTTCTGATCTATGACTTACTTGTT…	ARS209.1	2	251200	251600	34.1	0.36	1	GTTCATTTTTT	0	251439
GTCACCATGTACAGATTTAGACGGCCATAGCGTGCAGTTTCTGATAGCGGTGAAAAAATGATGGGACCTAGACCATAACCAAGAACATATAAAGAAAGATTTAATGTTGCCACTACATGACCAACGTGGAACTCTTCTTGAATATATTCCTGGCCAGGTGTGTAAATGGAGGATCCCATGTACGTGACGCAAGTAAGTAACATTATTTGGAATACTACCAATGATTTTTTCAGTAGGGGCCAGTTTTGTGGGTTCTCAGGATCACTGGGGCCGTTCCAATCCACCCTGAAAGGATCATTTTTTTCGATCTGTGAACCACTAGAGTCTGAATCGGTAGAGGATTCAGAGCACGATCTATTAGGACCGCATTCTATATCATAGTCGGGTTTACATTCTTTT…	ARS209.2	2	253600	254000	34.1	0.36	1	GATCATTTTTT	0	253971
GATGATTCTTCTATATTTTTTTTTTCTTCATTGTTATTTTTTCACTATCTTTTTCATCCCTCCGCAAAAGGACGCGATCCTTTTTTAGCACGTGAACGGTAATAACGGGTCCTGGACGATGTATTAGAGTCACCTAATCACCAAGCGAGCCAATGGCGACTCACTTGACTTGCATGTTTGCATAACCTATTTAGCGAACCCTCCAACTTCTGAGCGCACCAGCTTAACTTGTGCGCTAAGCTGCCTTGCCCGACATAGTGCCATCGCTCATTCCACCTCACACCTGATTAACTAAAAGTTTTAAAACTACGGGACTGCGAAAAAGTAGAGCTACGTTACTGCAGACCTACAATAATTGCACACATCGGCCTGATAACGAATGCTTCTAAAATTCTACTG…	ARS210.5.0	2	270000	270400	22.82	0.16	1	TAAAAGTTTTA	1	269936
CTGCTCCGAACAATAAAGATTCTACAATACTAGCTTTTATGGTTATGAAGAGGAAAAATTGGCAGTAACCTGGCCCCACAAACCTTCAAATTAACGAATCAAATTAACAACCATAGGATGATAATGCGATTAGTTTTTTAGCCTTATTTCTGGGGTAATTAATCAGCGAAGCGATGATTTTTGATCTATTAACAGATATATAAATGGAAAAGCTGCATAACCACTTTAACTAATACTTTCAACATTTTCAGTTTGTATTACTTCTTATTCAAATGTCATAAAAGTATCAACAAAAAATTGTTAATATACCTCTATACTTTAACGTCAAGGAGAAAAAACTATAATGACTAAATCTCATTCAGAAGAAGTGATTGTACCTGAGTTCAATTCTAGCGCAAA…	ARS210.5.1	2	278800	279200	22.82	0.16	1	AAAAATTGTTA	1	278968
ATGAAACTATATTACCTAAGTTACTGGGTAGGATATGGCTTGAGTTTTTCTTCTTATACTGCTCTGTGTTACTTCTTCCCTGTACCTGGGTGCCCTGTTAACAACATTATAAAGGACAAGGGCTGGTTCCAAAGATGGGCCAATGTCGATGATTTTGAAGAAGAGTGGAAAGACACAATTGAGAGGGATGACCTGGTAGATGACAATATTAGTGTCTACGAACACGAACACGAAAAGACTTTCATTTAAGCTCTCCATATCTACATCACTTTCTGCATTAATCTGAAATATTTTTCAAATTTTCATGTGTAATGATATTAATCCTTATCTATACTACTTACTTCTATTTACGTTCTCTTTAGCATTTACTTTGTGCATTTGGCCTTCAATGAGCATTAA…	ARS210.5.2	2	283200	283600	22.82	0.16	1	TTTCAAATTTT	0	283386
GAATGAGGCAGTAGCACATTCTTGAATGGCTTTTTGCCTATTTTGGCAGCATATTTAGCACTTTTTTGCCTAGTATCAGCACTGAGATTTGTACCTTCAGGGAATAGGATAAGATTGTATGGCCAATGGATTTGTTTTGGATCAATAACCTCCGGATTCCATATGCTCTCTCCTTCCTCAGTTATGCGCTCAGGTGACTTTCCAGCAAGTGAGCCGGCGCCCCTTGCATTCGAATCAAGGCCAGCAAGGCTGTTGCTTAGGGTTATTTTGTCTTGTGCCCACTTTCTACTCATAAAAATGAAATTATAGTTTCTCATACCGAAACCGAGGATAGGAATGGAAGCCAACGATTTTTTTAAAATAATGAAGACATTAGCCCCTAAGTTCGATGTGTAAGCC…	ARS211.1	2	321200	321600	33.28	0.06	1	TAAAAATGAAA	1	321130
GGTCCTAGCATAGACGTTAACAAGTTAGAAAGATGTGAATACATATGCCTTCAACCCTGTTTTCTTTTAAGGATACAAGGACACAGCTATTACAACAAATTTTGTTGGTTTCTATCTTATCTAATCGATAATCTTTTAATATTTTAATCTAATCGCAGTTATCCAAAACTGGAATGAGATGGTTCAAATCCCCAAAGGTAGATGGAGTTACTGCTGAGGCGTGGAAAAACCCGAGTTTTTCCGAAGCCGCATATGAGAAATTGAGCAGGAATAATAGATATTTACGAAGAGGTAAAAGTGATAAAAGGCAGCGCCGTGGCAATATCTATTTACAATGACTCATTCTGACTATTTAAAAGTATGTAAGGGCTTTATCTAGGCTTTGTGCCGTTCAGGCTT…	ARS211.2	2	324000	324400	33.28	0.06	2	TAAAAGTGATA	1	324256
AATGTCCATTCACTGGTTTAGTTTCCATCCGTGGTAAGATCTTGACCGGTACCGTCGTCTCCACCAAGATGCACCGTACCATTGTCATCAGAAGAGCTTACTTGCATTACATTCCAAAGTACAACAGATACGAAAAGAGACACAAGAACGTCCCAGTCCACGTCTCCCCAGCTTTCCGTGTCCAAGTTGGTGACATTGTTACCGTTGGTCAATGTAGACCAATCTCCAAGACTGTTAGATTCAACGTCGTCAAGGTCTCTGCTGCTGCCGGTAAGGCCAACAAGCAATTTGCTAAATTTTAAAGAAATAAAATTAACAAGATGATATAATAATAAGTGGAGGATAAAACGTAGGACTTCTGGTGAATTATTTGAACCAAAGTGTCGTATATTAGGCTCT…	ARS211.4	2	333600	334000	33.28	0.06	2	TAAATTTTAAA	1	333799
TTGCAGTAAATGCTGTTCTTCTTCCAATAAGTTTGGATGCAATTGAGACTGTTGTTGCTGGGCTTCTTCCAACATATCGCTGATAACCTTTTTCAGAAGCTCTTCTTCTTCAACGGACCATCTATTTGATGCTCTATTGGTACCACATTTTACGTAGTTTCTCCAACGATCCCTACAATCTTCTGGCATTCTGCCTAAAGTTTTACCTATTTCTGCCCATTGACCTTCTTTTTCTGCACATAATTTAGCTAGCTCTTGTTCCTCCTCCGCGGTCCATTTACCACGTTGTTCAAAAATGTGATATTTTCTTCTCATGTGTTTGTAGATAGAGGAGCTAGATCTATAGGGTAAGACTTTGTAAATATTATTCCAAAAGTTGTCCTTTGGCCTGTCGGAACT…	ARS211.5	2	335200	335600	33.28	0.06	2	AAAATGTGATA	1	335400
TCTATGGTTTTAGAGGTTGCTATTAAGGCATTTTCTAAACTTGAGGGTTGTTTGATCTTATGTTGGTTGGTTGTAAGCCAGCCGGTGTAGCCACGTGTTAAATCTTGACTTTTTTTCCCGAAGAGGGTCTGGTCCTGTCTATTTTGTTTCATGCATATTTTTTCTCAAGGAGAAAGACTCTTCGCTGCGCCTTGGCATAATAACGTCTTCGGTAGGGTCCATTTTTTTAACGTTGGCGATGCCCATATTTAGCTCGTTTGGTCGTTCCTTCGAAAGATAATCGTTCGTAAATTAAAAATAAAAGAGAGTAGTTTTCGAGCAACGAGTAGCCAGCTGGTGCCAATTGTCAAGAAAGGAAACATTTCTTACGGATTGGGAAGAAGCACTAATCTCGAAAAA…	ARS212.0	2	371600	372000	44.41	0.03	3	TAAAAATAAAA	1	371860
AAGTGCCGAGAAAGTAATTATCAATGTGGATCGCAAGCCAAGACAATAAATTTGTTGTTTCTGTGACTATTTCATGATGGCCTCCTAGTCAAAATACCAAGAAGAAGAAAGGTTTTTTTTTCTTTTTTTCCCTACCTGGCCATTCAAAGGTGAAATATCCTTTCCATTACCCAAAGAGGTAGTACTGTTTAGGCGGGGTTTGACAGGCGCTGGAAGGGATAGGCAAGAATAGGAACGGTTTCCAAAGCCATAGAAATTCCTCCTTCACGTTCTGTTGAAGGGAGGATAAAGCAAAATTTGAAACAATAACGACATTGTGCGGGTATGTATGCTACGGATGATTAATGAATGTATGTAAAAAAAATATAAAATTACAGAAACGAATAAGGTCATTAAGGG…	ARS212.1	2	373200	373600	44.41	0.03	1	AAAATTTGAAA	1	373630
ATACTCCTAGATCGAAAAAAGGGCTTTTCTTTTTGCGGCACCCCAAAGACAGCATTTCTTTTCTGTCAATTACGCGCCGTGTCGCCGTTTCTTTTCTTGGCACATTTACACACTTAGTCCGTTTCTTTTTTTGCGCGTTATATTCTGCTATGTTTTTTCGTTGGTTTATATGATGAGTAATCAAACTCATCCATCAGTCTGCAACATTAGTAGGTGCAAGGTGGAAGCTTTGTGCGCACAACATGTTTGATTGCAAAGATTTTTAGTAGAAATAAAACTACTCTTAACAGACTTAAAAATTTAATTTAATTATGCAGATTTGTCCTTTCTCGACTTGCATTAATGCTAAAAAACAAATATATATTTTGTTATCCTGAAGAGTGGCAACGAAAGCCCGAT…	ARS212.2	2	376000	376400	44.41	0.03	5	TTAAAAATTTA	0	376431
GGTTGCCGGCCCTGACTGACCTTTTTTGTATTTTTGGCCGTCCCGGCGCGGCGAAGAGTGAGACGACACCAAATAGCCGTACGGCAATAATCCTCGTGCAAAAATCTCTAAGACCGGTGTCGCATTATCCTTTACACACCAAATTTGGTGCCGTAATGCATTATGCATACACTGTGCAATTATGCAGACATGAAATGTGATTGTTTGCTTTGTATACGTAGTAATTGTAAGTAAGTGATTTACTGATTTACTTTCTGGTTAGCAGTGGTAGTTTTAATGCGTTGGCCGGATTGTTTATATTTTGTGAAGCAATCCTGGAAATTTTAAGCATCAAAGAAGGTGCGGTGCCACCATAAGACTTCAAAAATAGTTGGAAGTTTTACTATCCTACATAAATGG…	ARS212.3	2	378800	379200	44.41	0.03	1	GTTTATATTTT	0	379104
GATATTGAAGAGATGGATAAAACAGACGCTTTCAAAATTAACAACACAATAGCAATCGATGATTCTAAAGCTCTCTTTGTCTTCTGTTCAAACGACTCCTCCTCAAGGACAGCGTCTATCGAAACATTGCACGAATCAAATTTGGACAACCTGGATATGGGTTCCAGTAGAAGGACATCGTTGGACTTTTTTTAATATAACCTACCATAGGACACACTTTGTTGTTGATGTTGGACAATTCGTTAATTAAGAGTCCCTAAACGGCTCTACTAGTTCCAACCTCACTTTGTTTTTTCATTTTTTTATGTTTTTTCTAGAACCTTCTTTACGTGATTCTCGCTCGGAATCCGTCAATAGAATGTTTTCAGTCTCCGTTTCAATATTCTGCGCACATCAATC…	ARS212.4	2	380800	381200	44.41	0.03	2	TTTCATTTTTT	0	381139
TTGTATTTAATTTCTCGTGATAGAATGACTTGGAAATCTTATTCATGGCTATCGTGGACACGCTTTCCTCTTTCATTAGCCGCTGGTATTATTGTCCAAAAGCTTTTCTCTAACGACATAATTCGTTCCAATCCTTTGACGTTCTCAAGGAACTACTTTTGGCCTATCTCGGCTTTTTTCACTCAAGTAATTTTTACCAGTTATGTTCTGATTAATTGCTCCAATTTTTTTTTCCCCTGTGCCGATATGAAAAGCCTATCAATTATCGAATTGTTCATTATTTTATGGACCATTTTACTTTTTACGTCGAAGTTATTGTATAGTTCCGACTATAGGTATACCGGGCTTTATCCTCTCTCGATTTTCTTTCTTCTGAGCACAATAGCTGCTATATTGAGA…	ARS213.0	2	387600	388000	38.66	0.05	1	TTTTACTTTTT	0	387699
GGTAGCGTGCTTGAGCCGGTATAAATATTCAATGTCAAACACCTACGACTTTCGCAATCAACGGACCTCTCTTGCATTTTTGTATTTAATATGTGAAGATCTTTCCTCTGCATTTTCTTTCCTTCTTTATCTTTCTTGGCTTTTCACCCTTTCTCTTCTTTTTAGAACATCATCTTTGAGTACTTCGGCCACTTTTAGAAAAGAAATTAAATAAAAGAGTTAATCGTTCATTCGCTTCTACACAGTTTAATCTTTTCCATTTTTCTTTCAACAAGTCCCTTTGAGCTATCAAGAATACGTTTATTTGACTTTTAAAGATCTAGTTTTAATTTTACTATTATTCCGCAATGCAATTCAAGAACGCTTTGACTGCTACTGCTATTCTAAGTGCCTCCGCTC…	ARS213.2	2	392800	393200	38.66	0.05	2	GAATACGTTTA	0	393061
TGCGATGTATTGGCTGAAGTAGGTTTTAGAAGACAATTTGACTAATAAATTTTCCAGCTGTTGTTTCACTGTGTCGACATCAAAGTTAACTTCAATGATATCGTACAATTCTTTCAATTCCTCGTCAACTTTACCATAAATGGATTCGTCTTCAATAATGGATTGCAACATTTCCTTTCTAGTTGGCTTGGCGTCCAAGTTTAATAAACGGTACATACGTAAATGAGGATCGTAGCCAATAGATGGAATTTCGTCTAGTTGGGTAGAAATAGCGGATAGGAAAATTGTAGAAGAATATGTTTTGAATTCTTCTTCCGTGGCTCTTGGATTGGTAGAATATAACTTATAAAACTTCTTCCAGGCAGTAGTGTGCAACAATGGATCACCGGAAACAAAGAA…	ARS213.4	2	397200	397600	38.66	0.05	1	GAATATGTTTT	0	397296
TTCTTTTTTGCCTTTTTATTCTTAATGTTCAAGAAAACTTTCTTTCCATGGAATGTATGAGGACCCTTTATTTTGAGGAATGGGTTCGAATTTATCATGCAAATTGGCAAGAATTTACTAAGTGGACTATATTTAAAGAGTTGAATTTTACGGTGAAAGTAAATTAACGCTACTTCTGTTGTTTTGGAAAAGCCAAGTTCAAGTTTCTTTTCTTGATTATTTATTCTCGTAACGATTTCGCTTTTCCTCTCTATATATTTTCCTACTCCATTCTGTAAAGAGCTTCCAGAACAAAATATAAATAAATAAAAAAAACTTCTCTTCAGGCAAGAGTACGTTCTTCGCTGGTTTCCTACAGAATCAAAAGAGTACTGCAGCTTATTGTACACACTTACAATA…	ARS214.0	2	407600	408000	31.19	0.14	1	AAAATATAAAT	1	408027
CCGTAGTCCGGTTTAATCAGCCTCATTGGAATTCCCCGGCACCGCTCGCATTCCGCGTACGACTCAAAGAATTTCCCATTGAATTCGGGAATGTGCGTGTTTCAGATTGCGTTTGCTTATTATTCTGGGAAACTCTCCGGAAACAAGCTGAGCTGGACTCCACGAATGGTCCCTCACAAGGCTCTTGGCTCATGCACAGTTAAAAAGCACCTGTAGCTACCATCAGCAATCCATGGTGCTGGAGTTTCTCTCGATGGTACGGCCCATAGCTGGAGAAAATAGCTTATTACCAAAAAAGTAATTCCCCCGCAGAGGTATATATTAAGTTTGAAACAAAAGGCTTGCTTAATTTTTTACATATGACAACCCTTTTCTTACTTTTATAAATGTTTATGAAAC…	ARS214.1	2	408800	409200	31.19	0.14	3	AAAAAGTAATT	1	408966
AAATTTCTTCCCATATTCAAGTCTGGAAGAAGACCATACAAAACAAAATCAAGGACTCGCTGACCCTATCATCAAAGGAGAAGGAGCTTCTACACCTTATCGAACATGGCGCTGAACAAACTACTGAAAACTCAAACCTGTTTTATGACATATTTGAAGAAATTATCGACTCTCTACCTTCAGTCAGTGATTCTGGAAGTTTAACCCCTAAAAACCTCTATGTAAGTAATAATAGCAGTGGATTGTCAGTACATTCAAAACTGCTTACGCCAATCACTGCTTCCAACGAGAAAAAAATTGAAAATTTCATAAAAACTAATGCTGCATCTCAAGCCAAAACCCCCCTCATTTACGCTAAGCACATTTATGAAAACATAGACGGCTACAAGTGCGTTCCGT…	ARS214.2	2	410000	410400	31.19	0.14	1	AAAAATTGAAA	1	410003
CCATGCCAGCTGCTACCCAGGGATTGCCACGGCCCCGGCCAGCGTATAGTACACTGTCAGGAGCAATTCGAAGAGGCAACCAAAATTATGCTAAGCATCGCACTCTCTCTCAGTCTGGTGCTAAGCGGAAGACATGCTTCCAATGGCCTCCTCACCGAGAACGGATATTAAACGAAACGAAGAAAAAAAATCTTCACGGAAAATGCGTAATGTCTGGATGACAAAATGCATGGGTGTAAAAAAGGAAATGAGACGAACTTGTAATAAACCTTAGTGGGTTGACGAATTTTGAAATAAAGTTTTTCCTTTTTTTTTTTTTTTTTCTTTTTCATTGTTTGGTTGCCTTCAAATTACATATAAGATTTCTCGAGAAGGGTTTTCCATTGTCCTTTTCATTAG…	ARS215.0	2	415600	416000	36.7	0.27	1	AATAAAGTTTT	0	415743
GAACATATGTAGAGATACAAGCGATTATTAGAAGGAGCGGACCTACAACAAAGTTGGGTCACGTTTCTCGCAATTATTACTTGGATGCCCTCCTAGCTAATGCCAATGTGCAGTAGTAACTTATCAGTCCGATGTGTAAAAAATAGAACTAATTTTTTGCGAAAAGATGGACAAAAACCATCTCTGGTCAATTTTCTCACTAAAGAGGGACGGAGTCTCTTGTTTTCTTCTATTAGTGCACAGGGAATGTTTTGATTTTCCCTTTTTTTTTCTTTCGCTTCTTCAACAGTGGTAAAAATAAAAATTATTGGCGATGGGATAACCAAGGAACATTGTATTTAGCAATTGAAAATTACGGTAAAGGCAGCCGCTCTGACTTGATCTCTGACATTAAAAATT…	ARS215.5.0	2	431600	432000	54.75	0.02	2	TAAAAATAAAA	1	431895
ACTCTTCCAAGAGAGACAGTACCACCATTATCGTTTATACGTATCAATTCTCCTATGTGTTGTGGCTTATGATCGAAAGACATCGTCTTTATGCCATTCGATTTGGAGGAAAGAATACATCGCGAATCACCACAGTTAGCCACATACAGTGATTCCTCGTTTATGATGCATGCTACTACTGCTGTAGATCCACACGAACTGTTGGCAAAATGTCGATATAACTCTTCATCTTGCAATATGAAAGCGTCTTTAAAAATTTGAGAAACAAGTCCTTCCAACGTATTGAAGGATCTTTTAAATTTTGATGAGTCGTTATTAGTTGTAGATGTGTAATGGTGGTTTTCGAAACTATACGCAATCCATTTGATCAGGCCAGCGTTGGGTTCACCATTACCGTTG…	ARS216.0	2	488000	488400	30.96	0.43	1	TTTTAAATTTT	0	487946
AACAACAGCATCAACCACAGAACGGACCGCTCGACTATGCTCACATATGCAAGTGTATTGCAATGTTCTTTGTCGTTGCGGGCGTGGTGCTGATGTTCTTCGAGACCGGGTTGGACCCAGAACAAAAAGAGCAAATCAAGCGTCTCCACCAGTTGGACGGCATTCCTCACGCTTGATGTGCCCAGGGTGATGTGTTCCTTGATCTTTTTCTTTTTTTTTTTTCAATTACGGATTATGCATATATAGGTGGGTATACGTACGTAAAAAAACAAAAACACACATGTAGACATCTATATACGTTTAAAAAAGCTTTAGATTCAGATCTTTGGGTTTTACAAAAAAAAAACGGACAAAATAAAAAAAGCCTTTTTCTTCAGCAACCGTCCTCTTAGATTAGAG…	ARS216.1	2	490800	491200	30.96	0.43	1	ATATACGTTTA	0	491165
ACATTTTCTAGGAAACGTGACTTTTTGCTGTGCTGTTTATGATTAAAGCCTGGTTTGACACCAACAAATACGTTGCTATGCATATGCAAACTGAACCCTTTGTATATATAAAAATTATATGTATAAAAGAAGAGGAACGTCCGCACAATTCCACACACACACACACACACACGCTTTCACACACGCAATTTGAAATAGCTCCTATAGGGCTTGGGAATAGGATCACAAGTCACTCGAAATATACCATTTTTTCTATCACACATACACATTGTATAAAGCCATTTGTTTCAAAAAAATATAAAAACACTGCGCAGCGTGCTGTTTCGGGTTCCATTTGTGATTGTTTATTTTTCTTTTGGTTTAGCTCAGTGCAAAACGAGGGCTCGAAGAATTTTCAGA…	ARS217.1	2	504400	505600	35.82	0.01	8	AAAATATAAAA	1	504489
TGAAAGAATTCAGGAATGAAAATAACTTACTATTGCCCGTTGAACTTTCTTCTGATGATGAGAATGAGTCTCATTTCACTGATGCTAACTCACATGTTATGCAATCAAAAAGTCCCGAGAAAATACCTTCCAAGGATCAATGCTTGACTAAAGGCGCTAAGAATAAAGGTCTGAAAAAGGAATATGAAAAAAGTTTTGAAGAGTATAGCGACGACAGTGACGATGAATTTTCTCCTGCTACTCCACCGGAGAATGTTCTTGAAGGTCCTTACAAATTTGTGTTTCAGACACCAAACACATTTACATCTCAGCCTAATATAACAGTAGAAAATGATTTTCACAAAGGTGGGAGACATGTGATTGACTATCTGAACAAAAAATTGGCTACTATGAACATTG…	ARS218.1	2	538400	538800	45.47	0.01	2	AAACACATTTA	0	538587
AATTTCGGAATGCTTGAAAATTGCAAGAAGTTCAAATCCTGGATTGTTATTTCATTGAAAATATTGAAGGACACTTCCATTTTTTCTTGGTCCTCTGTAACGAAACTACCAAATGCAGCCATCTTCTCTTTATTTATGAACGAAGTTTTCAAGAGCTCGACCATATCATCTTTTGATTCTCTCGTATGCTTAACTAACCTATTGAGAACACCCTCATAATAATTTGAATCAAAGGCATAGAATTTTGCGTATTTACTTGTCAGATTGAACTTTTCCATCGTACTCCGTAGAAAAAAAGTGTAAAAAAAAAGAGATGTTTGCCACTTCAGATTGTGTACTGAAAGACAGCGTTCTTCAGATCCAAGCATACGGGTATGTGTATCCCTCAATAATCCAATT…	ARS218.3	2	542000	542400	45.47	0.01	1	AAAAAGTGTAA	1	542022
GGAGCAATTACCTGCATAGGCACTCATAGGCCACAAGGGTTTGATGGCGGAAGGATGTTATACCTACGATACTACCATACATGTGATATGTCACTTTCTAGTCCGAAGCGTGGAACATATTATCTTGTTTGACGTTGTGGGTGTTAACCGTAATTGTCTGGGTACGCCGAAGGCACGGAGACCATGTTAAAATATGTTTCTCTTTTTTGCTCATTTTTTTCTATTTTTTGCTGCGCATTGCCCGAAGCTTTTCTTAGTGGTAGTCTGCTCTCGCGCTCTTTGTTACACTCGCAAAATTTTTTTGCTGGGCAAAATAAAGCACTCTCCGGCCATTACTGGCTGTCGTCCGCCAGGATTTTCATTAACTTGCAGAAGTAAACAAACAAAACACAATTATGA…	ARS218.6	2	555600	556000	45.47	0.01	2	AAAATTTTTTT	1	555828
TTACCAGTAAATCTGTCTTTTGCTTGGCAAATAATTCACTTGATCCTATTGACTCATCAATCTGATTTGCTATGAACGCTTCTGTTGAAAATATGAAGTCATAAATTTGACCGAGGCCCTGATATTTCGGATATTCGTGTAGCGGAACATCCAACGCATTGAGAAGTGCTTCTTTAGTATTGTTATAAGTCATTGTAATTGTTTGCTCGGCCATTTGATCAACGGAAGTTGTTAAATCATTGCACTTTGCTCTAGCGCTCAAAATTTCAGGTCTCAATGTTTCCAGTTGTTCGTTAATTTTTATTTCTTCTTCACTATACATTTTCATATTAGATTTGGAGATCATTATTATATCGCTTAATAATTTCGATAGATAAGTCTTGGCAGGTAACAATTTAG…	ARS219.2	2	587600	588000	46.67	0.02	3	GTTAATTTTTA	0	587614
GGTACTATTGTGGCGGCATCATCGTCCTGATCTGTGGAGTCCTTGTGCGGTTTATTGCTGTCTTTGAATTGTTGTTTTCCTTCAGACATCGTTAAATGAGCCTACCGTTTTGCCTCTATCCGTGATATCAGATAATGTTGCTATGTTCGGATGTACTTTGCTTTATTTATTAAGGGCTACTGTAACCTGCGTTATCCTGTTTCAATAATGCATCGTCCGTCTTAATTAATATTAGCCCGGCCATATTCTTCAGCATGAAAAGCTGTATTTACCCGGACTGCGCACCAACTTTTAAATATTAATCTCCGTTCGGTCTTTGCGCGAGTTATTATACTAGCGCCACGTATTAGTAATACTATAGCTATCTTGCCAGATAAGGGATCACAAGGAATTATATAC…	ARS219.3	2	589200	589600	46.67	0.02	1	TAAATATTAAT	1	589311
ACATAGGATTTTCGCCTGCCCTTGGCCCATACCGAAAGAGTTTCCTAGGATGATGGGCCGGCATGAAGATAAGCGGCCTGTATGCCCGAGACACTGAAAAAAAACAGCAAAAAAATAAGATGTATGGAGTTCAAAGATGTATGGATGCAAGAAAAGAGGTTAATGGTGCAAACTGTAGAAAAAAAAGTAAGGAAATAATTTATTTTTAATAAAATTAACTGAAAAGATACATGTATATTTTTCTCAAATTAATCAATGCAATATGTGATATATTTGCTATCTGGCTTAATGAGATAATTTTTTACATAATTATGTTGAGAAGTTAACAGGGCAGTCTCTATTGTTTTGATCGATTGAGTGCACAAAAATTGGAAGGGGGCCGTGGAGCACTACCTGCAA…	ARS219.4	2	593200	594400	46.67	0.02	2	GATAATTTTTT	0	593235
ACTAACTGTCTTTGTCAAACATAAATATGCGATCAATATAGACCGTTGATATCAGTGGTAGAACAATAAGGAAATTGCCCTTGATGTGTCTGTCTGAATACTTCCGGACATTTCCTGTAGACGACGATGAGTTTGTTCTGGCATTAGCTATGTCAGCGCGGAAGCTGAGCGCAGCGCGGAAGTGACGGAGGAGCTTTTTCCTTTTTTTCGCTTCTTTCTTTTGTCTCATACTCATGTAGCATACTTTCGCGAACCCTATTCCAACGTTTTGTTGTTGCTCGCTTTCATGCTTAAAATTTTTATTATGTATTTTACGATCAAGGTGTATCGTGAACCACACGTTTATGAAATCCTTATTTTAGAATCAAAAAGTCCTACAATCTTGTTTGTGGAGTCTAT…	ARS219.5.0	2	602400	602800	35.03	0.06	4	AAAATTTTTAT	1	602461
TGTACAAACAAGAGGGTTTTAGAAGCTTGTTTAAGGGTTTGGGCCCCAATTTAGTCGGGGTTATTCCAGCAAGAAGTATTAATTTTTTTACCTATGGAACTACTAAAGATATGTATGCTAAAGCGTTCAATAATGGCCAAGAAACACCTATGATTCATCTGATGGCTGCTGCAACCGCAGGTTGGGCAACGGCGACGGCAACCAATCCTATTTGGTTGATTAAAACAAGAGTACAGCTTGATAAAGCTGGGAAAACATCGGTCCGACAGTACAAGAACTCTTGGGATTGCTTAAAAAGTGTTATAAGAAATGAGGGTTTCACTGGCTTGTACAAAGGGTTGAGTGCCTCTTATTTGGGTTCTGTTGAAGGTATACTTCAATGGCTATTATATGAACAAA…	ARS219.5.2	2	608400	608800	35.03	0.06	1	AAAAAGTGTTA	1	608313
TACCGTTAGATTCCATTGACAATTGTTGCAAGTAGGCTGGGAATCTGTGCAAGTATTGGTCGAATGGAGCAACCAAATGGGTTTGAGCACCAAAGAAGTTGTTGTACCAGACAGACAACAAACCACCCAACAATGGAATGTTGTCTTCCAATGGGGTTTGGGTGAAGTGGTTGTCGACGGCTTCAGCACCCTTCAAGAAAGCCTCAAAGTTGTCATAGCCAATGTACAAGGCAACAGACAAACCAATAGCCGACCAGACAGAGTAACGACCACCGACCCAACTTTCGAAACCAAACATGTTTTTGGTGTCAATACCGAACTTGGCAACTTCGGTTTCGTTAGTGGACAAAGCAGCGAAATGCTTAGCAATGTGAGATGGATCATTACCTGTCTTCGACA…	ARS219.5.3	2	612800	614800	35.03	0.06	4	AAACATGTTTT	0	613075
GAGGGTAACACTTTGAAATTCGTGGATGACGGTACCATGGACACAGACCAGGAAGACTCACTAGTGAGCACGCCTAAACTCGCACCACAAACGACCGCTTCCGCTAATGTGAGCGCCCAAGATTCTGATATCGATCTACAAGACGCTTGAAAGTTCTAAAAAAAAAAGCAACAGGGCCTTCATTCTTTATTCTTTTTCCCCCTTTTTTTCATTTCCATATAGCTGCACATTCAAATTTACCTTCTGTAACTTACTTCCAAGGCCCAGTTTTCAAGATATGTATTCTGTATTATTATAATTTTACTAATATTATTCATCGCTTTTGCCAGCCACAGACCCCACACATTTCGGACTTAACATTATGACTGCGCATGTCCGTGCACCGCGGCCCAATTCTTG…	ARS221.0	2	628400	628800	39.94	0.05	6	TTATAATTTTA	0	628445
CCTTTTTATTTTTCATGAGTGGCTCAAGGTCCCCAGAGGTACCAATAGCTCAGGGCACCAGTGTCAGTCGTGTAGCCAGTAAGGATTATTTGATGCCGTTTACTGACAAGTCACAAGGAGTAATCCATCCCGTGGACGATGGAAAGAAGGAAAAGGGTGTTATGGTCACATTGGCCAGGAATTCAGATTTATGGAACTTGGTAAAATCTATTAGACATGTTGAAGACAGGTTCAATAACAGATATCACTACGATTGGGTGTTCTTGAATGACCAACCATTTAGTGATGAGTTTAAACGTGTTACCAGTGCATTGGTTTCAGGCAAGGCAAAATATGGGACAATCCCAAAGGACCATTGGTCCATTCCATCTTGGATCGATACTGAAAAATTCGATGAGA…	ARS221.3	2	633600	634400	39.94	0.05	3	TAAACGTGTTA	1	634013
ATTACAAATAAATAAACTGCAGCAGGGATAGCACCTATTGTTTCTGGAAGCACCGGACGGCCAGGTTTACTCAAGTCCTTACCGAATAGGCCTATTTTGATGAAGGATTTGCCCACACGTGGAATCAACATATCTGTAGCTAAATAGCCTGCTATACCAAATCCCACGGCCGCAACAAGAGCAGATGGGCCCTGATTTTTGGAATAGTAGATTAAGCATGTGATAAGTGCCAGTGAAAAAAGTCGCAACATATAGTCTACTTTTTGTTACCGTTCTCCGCCTTGCTCTACTTGATAAAGTTTTTATTTACATATTTCACAGTTATATACACATGTTAACAATTTAATTTTCGCGCTGTTTAGTAAAGCATTTTTCGAGATTGAGGCAATATAAAAGGAA…	ARS222.5.0	2	706800	707200	43.99	0.01	3	GATAAAGTTTT	0	706828
CACCAATGTCTACAGCGTACTTCACGTTGTTCTCCTGAGGCAGCATCCTCGACTTCAGTTTACGCAGGAAGTTATTGGATCCCAGGACATCCATTGTGGGTACTACTGTACCTTCTCCGTATCCACCTAGAACACCATCCACAGTGGCGTCCACATCCGTCCAATAGTCGATGGCATCTTCGTATTTGATATGGGAATCTGCAGGCACGTCCATCGTTGTTGTTTATGTATTCTTTCTTGGAGATGCTCTTGACACCGATGCACATTACCAGAGTGAAAAGTACTGATTAATAATTAAATTTTTCTTTTGATATTTTTTCTGAATATAAAGTTCTACACAGAGTCGTTACAATAGGTTATATACATGAGGATGTTCGTTACAGTAGGAGAAATAGAAAG…	ARS224.0	2	735200	735600	45.05	0.02	2	AATTAAATTTT	0	735602
GCCGGGGATCCTTTCAGTAGTTATTTTTCGGGTGGCCATATTAAATGGTCGTCCACGTAGTAGATTTAAGGCTCCCGTGCGAGGATACCGATAACCTGTGCTTTTGATGGCGCACAACATTAGTTCTTCTTTTTATTATTTGGTTCTTTCTGACTCTTTAGCAAGTTAATATGATCTGCACTTTCCCCATTGGCCCCTTTATAGGGCGGAAAAGAGCATCTGTTTTTCCGGATTCTTGGAACAAGAAAAAGGAAATACACCTATCTATATGCCACTATTGTATATTACTAAATAAAATATTTAATTATATACTCATGCGTATGCCCTCAAGAAGTTCACCAATAATTCTTTGGTTTCTGCTGTTACCTTTTATGGTATTCAGGATCCCAAAACACTGCA…	ARS224.3	2	742400	742800	45.05	0.02	2	TAAAATATTTA	0	742742
GTCCCACTAAATACGAAGTTCGATATGCAGATGGAGATGGGTTCACCCATGGCGATGCCGGCAGAAACGCCACCTCCTGTCGAACCTTTAAAAACAAAAGATCTAGCATATTCATCCTTGGCTCACCTTCCTAGCTATTTCTTTGAGCAAACACATTTCCGCATAGACCGCAAATGCCTGTTGGAAATGTCTAAGTTAAGGCGAAATTATCTAACTATAAGTAAACAAGATGCTTTGTCATGTCCGCAGCTTCATTCAAGAGTGGCTGGGGGTTATCTTAAACCTGTAAAAGAAAAATTATTTGGAATACGTCACTTTCTTGATCTAGAGGAAAGTAATACTGTAAACCTCCTCCAGGATGGTAATTATATGACGGAATTGTTCAACAGTCAGATTAAT…	ARS227.1	2	771600	772000	46.11	0.02	1	AAAAATTATTT	1	771762
AATAGCTTACAAGCGTTAGCCGAGTTCCCAGACAGCAGAGTTTCTACCCTGTGCTCTTTGTTGGCGGCTTTATTGATGAGGAATATAAAAATGTAATTAGGCAAACCTACGCGCGAAAATATAAGAAGCAAAGATATAAAGTGTAGTATATTTGAATATTTACATGAACGAAACGGCGACGTATAATGGTAATCGGCTGGGAACTTCATTAAAAAGTCAAGATGTAAGTTACCTCTTAGTAAGAAGAGTTATTGCAGCAAGCTTAGTATCAATAGGGAGACTCTGTCATGTAAAAAAATAAATGAACACAATCATAACCTCTTCGACTGGGCTATTCGTTGTATAGTATATGTGGTGGAGTGTAATGAATGAAGTTCTCAGAAGCTTGAAAGCATATCA…	ARS228.0	2	785200	785600	38.52	0.02	1	AAAAAATAAAT	1	785151
GAATTTGAGTCACAGATCCCAGAAAAACTCCACACCTTCCCCACGCAGCAAGCGATAACGAACAAGTTGTCAAATTAGACCCATAATAATTTTGAACACTTCTACCTGTTCATGTCTTTTCTCGAACACTGTCATTTGAAATTATGCACTGTGAAAAAAAGAAACAAAGACCAAAAGAATAATATAAATAGTGAAGTAAAATGTGTTGTAATGCACATGGATCTTGTACTGCTCAAACTTAATATTTCTATTGTAGAAAAATTTTCGATTTAAAATTGTGAAACCGATTATATAAAAGTATATTAGCTGACATTAACGTCTCAAAACCAGGTCAATAGCTTTAAAAATAAAAATAAATCCCTGCAGAATACTCGGAAAGAATATGTCACGTAAGAGCTC…	ARS228.1	2	788800	790400	38.52	0.02	3	TAAAAGTATAT	1	789138
CACGTTGCAAAAGTTTTGAAGGATGATGTGGATTATACTGATGAAGACAGCCGTATAAGCACATCTTACAGTAACTATGAAACATTATGTGCTGCAACTGGGACAAATTTACCGTTTTTTCATATCGATATACCCGATTTTTCTAAATGGGACGTTTAGTGTAGTAGATAGTAAGTACTTTAATTACCCCCCCTGTTTTTAGTTATACATGAAAAGATAATTGTGTTATTAATGTAGATTACCATCAAATAGCTGGAATATTTATTATTTTGAGTATGTTGAATGGCGAAAGTAAAAATAAATTTTATAATTTCCTGAAAGCATTAGTACACGAAAAGGGCCGTTTTCAGTAGTTTAAGGCGCTGAAAAGACATGGTCTAGAAGTTAACTTGAGCTTGA…	ARS228.2	2	791600	794400	38.52	0.02	9	TAAAAATAAAT	1	791941
GTTATGTCGTTACTGGTGTGAGTCGATATTACGAAACCACTGGCAGGTAGATGGATAGAATGGGACTGATTGGAACAGCGCAAGTTTTTTTCCGTGGTCGGAATTCTCGTAGTAATATTGGAAAATAGTTGGAAGAAAAATTGTGTGAAAAAATACATGCTGAAATAGTCAAACGAAGAGAGGTGAAGAATAGATAAAGCTGTTGAGAGGCAAGACAATGTTTTCAAGATGATCAGAAAAGGATACGGTCCAATATCTATTTATATTCATTGCCCTACCGTGGTATGTTAAAAAAATATGTTACATTTATTGCTCCCATTGGATTTTGCACAGGTGTGAAAGAGCTCAGTTGTCAAGATTTAGTCATTAAGAAGGGCCGCAGCAGCTTTTTGTATAATA…	ARS229.0	2	799600	800000	44.61	0.03	6	AAAATATGTTA	1	799948
AGTTCCTAGCGTACCTAACGTAGGTAACATGATTTGGATCGTGGGATGATACAAACAACGTAAGATGAGTAGTTCCTTCCTCAATTCTTCTTTCAGCATCATTTTCTTGAGGCGCTCTGGGCAAGGTATAAAAAGTTCCATTAATACGTCTCTAAAAAATTAAACCATCTATCTCTTAAGCAGTTTTTTTGATAATCTCAAATGTACATCAGTCAAGCGTAACTAAAATACATAAATGACTATTTCTGATCATCCAGAAACAGAACCAAAGTGGTGGAAAGAGGCCACAATCTATCAAATTTACCCAGCAAGTTTTAAAGACTCCAATAACGATGGCTGGGGTGATTTAAAAGGTATCACTTCCAAGTTGCAGTATATTAAAGATCTTGGCGTTGATGC…	ARS229.4	2	805200	805600	44.61	0.03	3	TATCAAATTTA	0	805400
CATGCTGTTGCAGCAGCAAAACCGGCATTACCGCCAGAACTAGCGAAAACCTGAGGAGATCTTTTACCGTCCTTTTGAATTCGAATGGCACTTTTCATGATGAGATTACCGATTCCTCTACTTTTGAAGGAGCCACTTGGTTGAAGGCATTCATATTTCAAGAAAAATTGTGCAGAAGCCTTTCCGGGGAAGAATTGACGTAATAATGGTGTTTTATTGTAGACTATCGACATCTCGCTGGTTAATTTTCCTGTCTCTTGTCTATCCAGCACTTAAAAAAGAGAAAACTGTATAAACATTTTCCTTTTATTTGGCGATATTTATATACCTGTGTTCCTCCTCATATTGTCCCTTTTATCTTATCTCATCGCAAACAATTTGATAAAGCTTTGGCACTAT…	ARS320.0	3	16800	17200	41.4	0.03	3	TAAACATTTTC	1	16938
CGTCTTCAAGTAACTTTCTCTGTATTTAGGAAACAAAGTCATAAAACTGGACTCTTCAGCAAAAGGTTGACCGGATGCGTTATCCTCTTCCTTAAACTCCTCTATCTTCCATTTATCAATATCATCCGTATCCCAAGGTTTATCTCTGTTATGTGTAGACACCATCGTTTGCCAATTTGGATATTTGTGTGACCCTTTTGTTTGCTGTCTACTTTACAATAGTTAACCTCATCATCTCTTTTTTTTGAAAATTTTCATATCTCATCGCTAAAAGAATTAGAAATATAAGGAAAAAAAAATTTTCGTTTTCAGATGTGCAAGCCTGCTATAATAAGGTACAATAACTCAAGGGCATTTAGCAAGGAAAAAATGGGCAAGTGTAGCATGAAAAAGAAAGGT…	ARS320.1	3	23200	23600	41.4	0.03	2	AAAAAAATTTT	0	23505
CAAGTGGAAAAGTTAAACAAAAGTAGTGAAACAATGATACCGACGCTGCTGCGGGAGGCAAGTACACAAGAGCCAGCTAAACTGAAAGCTGAGACTACTTTGAAAGCCGAGGAGCTGATCAAGGACCAGGAAAAGGACTCCAAGGTACGAGAGCAAATTCGGACAGAAAAATCAAAAACAAACGACAGCATGCTGAAGCAGATCGAAATGATATCCGGCTTTTCCTTATAGGGAATAGTGGTGAAAGTTACGTAAATATATACATATAGAGCGGAATGGTACTGCATATTTTTATTATTTTTTTTTTTGAATATATATAAAGCATCGTCGCTTAAGACTAAACCTTCGAGGATCTGAGGCCAGCGCTGGATCTAAAGATGGCGTCGCCCTCGGCGTAGC…	ARS304.0	3	24000	24400	36.09	0.07	2	TATTATTTTTT	0	23985
ACCAATTAACTTTCTTACAGCATGTGTCGTCTGATAAAGAAATTAGGGACGCATCTGTGAACTCCTCAATGAAACTGGATGAGTTGAACATCGATCTATCTCTGCGTCACGACATCTTTTTGCAATTCGCCCGCGTCTGGCAGGATGTTCAATCGAAGGCAGATTCTGTGGAAAGAGAAACTTTCAAATACGTTGAGAAGTCTTACAAGGACTACATTCATTCTGGTTTGGAACTTGACGAGGGAAACCGATTGAAAATCAAAGAGATCAAAAAGAAGATCTCCGTTAACTCTATTAATTTTTCGAAGAATCTGGGAGAACAAAAGGAATACATCACTTTCACCAAAGAACAATTGGAAGGTGTGCCGGATTCTATTTTGACGCAGTTCGAGACAATAA…	ARS304.1	3	25200	26400	36.09	0.07	1	TATTAATTTTT	0	25341
AGAAATTATTTCAGGCGAAAGCTAAACAAATAAATCAATTTGCCACTACGCCATTTGGGTGTAAAATCGGAATAGATTCCATTGTTCCAACGTTGAATCACTGGATACAGAACGAAAATTTGACTTTCGACGTGGTGATGATTGGCTGCTTAACAGAAAATCAGTTTATTTACCCAATTTTAACCCAATTGCCATTGGATAGATTGATCTCCAAACCAGGTTTCCTGTTCATCTGGGCCAATTCTCAAAAAATCAATGAACTTACTAAACTTTTGAATAATGAAATATGGGCTAAAAAGTTTAGAAGAAGTGAAGAATTGGTTTTTGTTCCTATTGACAAGAAATCACCGTTTTATCCAGGTTTAGATCAGGACGATGAAACGTTGATGGAAAAAATGC…	ARS304.2	3	28400	28800	36.09	0.07	1	TAAAAAGTTTA	0	28451
CCAAGAGATATAAAGAAGAGATAGCTAATTTAGGTTCGAATATCCCATTAAAAAATGAGATTGAGCTGTTAAGACCAAGAAGTCCAGTACAAAAAGCACAATAAAGCATCAACACATAAATCCTTGCTTAGCTCAATTAAATATACTAGTAAATAAGTATATAAACAATAATTTTGCATTTTATTTTACTGGAAACTCTTCTCAAAACCAAATTGCGCAAGGATTGATTCAGTACAATTATGCAAACTCGAAAAGTAAATAAACAAAAAGATACAGTTGAGTGAAAGGTAAATAAACATTATTCTACTTGATTTTCCTCTGTTTTTTCCATTTTTCTTTTTTGTCTTTTCGTGTTCTAGCGTGTTCACTTTTTCAGCCATGTAATTACTTAAATAGGAA…	ARS304.3	3	28800	29600	36.09	0.07	5	TAAACATTATT	1	29123
AGAAAGTTGAAGCCACAAAACCACCCGCATCAAGAAATGTTTCTGCAGAAATTTTTGTAGTGTGTAAAGGTTTCAAGGCACCAAAGAGGCTGGACCCAAGATTACTGGATCCAAAAGAAGTTTTTGAAGAATTGCCAGATGGGCAACAGAATATGGAGTCCAAGATTTATAATCCCGAAAAAAAAGTTAGAAAAAGACAAGGTTATGAGGAAGGTGATAATTTACTGTATCATGAAACCTCAATTTTGGATTTTGTCAGGACGGAAGACCCAATAAGCATGCTTGGAGAAATGAATAAGTTTACAATTGATGAGAATGACCATGAATGGAAGATCTTGAAGAAATTGAAACAAACCACAGACGAGTTCCGTTCCTGTATTGAAGATTTAAAAGTCTTGG…	ARS304.5	3	32000	32800	36.09	0.07	1	GAATAAGTTTA	0	32271
GTTGATGGTGTCATGAAGAATGAACAAAGAGCCCTAAGACGTATCGCAAAGAAGCATCACAAGAAAAAGTAGTAACAAAGAGCATTATTTTTCCATTCCCTTGTATAATATTGAAAATAAAGGAAAAGAAAGCAATAGATATATTATGTATACATAGAATTAATCAAATTATCATCAAAAAACTTATAGGAAACCTATCGTTTTGAATTCAGAAAATACGAGTGCACAGTAGAACAATTTTTATTCCCGTTTTACTGATCTTTTCTTCTTGTTGTTACCAAATACCTTGGAGAAAATGTATATGATGGAGATGAGTAAGCATAGTAACGTACCATTTTTGATCTTGGAATAATCCTTTGTGTCAGGCCTTGGAATTGGTACTAGAAGAGTTGTCGAGTT…	ARS304.6	3	34000	34400	36.09	0.07	2	AAAATGTATAT	1	34193
GATTACGGAGCTGTTTACGATAGCAGGAGCAATGGATTTGACGAATGACACTTGATAAAAGTCTTTGGTCGAAAATACAGTATCAACGCCGTCGTGGGACTCGACCCCTGGTAGAAGAAGCAGAGCATCTAGATCAACGGTAGATGCTGCAGAGGTCAAAGCCACAAAGAGGGAAGATGCAGTTACGAGGTATTTACTAAACATTGGTTCGAAGTGATTACAGATTTTTCTCTCTTGAACCCTGGAATTGCAATAGCTTGGTTCCTATTGGGACCGGACCCTCTTGCGTAAAGTATATATTTAGAAGCAGCTATTTAAATCTGAATGCAAGACGAAAAAAAGCTCGTTTATAGGAGAAAAATACCAAAAAAAGGAAAACCATACACATTCGGGTATCCC…	ARS305.0	3	40400	40800	26.42	0.39	1	GTATATATTTA	0	40811
ACTCCAAATGCTACGCAGCCAAATGCTACGCAGCCAAATACTACTCTTCCTACCGCTTCGGTGACTACGACAGTTTCGATTGGCGAAGCCGTAGTTAATACCATGGCGGCGGGTGCCTTTGGAGCAGCAATCGCTGCCGGTGTTGCCTTCTTATTCTAGGAACATTTTTATTTCCTTTATTTTTTTCTTTCTTTCTAATTCCATAACCGTTGTTCAAAATTGGGGAGCTTTTTAACTTTCGTTCCATTAAGCTTTTTCTTTGTTCTTTACGTTTGATTCTATTTCAACCATAATTTATTTTTTCGTTATTTAATAATTACTAATATTTAATACTAGATGTATATACGTTGTGTGTATGCGCTACTATAGTATAGCTTAACTGTTTTATTATACCCTTTT…	ARS305.1	3	41600	42000	26.42	0.39	4	ATTTATTTTTT	0	41859
GTCAGCCTTTAGCTTTTCAGTTACCTTGTCGTCGGTGAAGAAGATTACAGAACCAAAGGCCTCATCCCTTGCTGAAGCAGGCCTCTTTTGACCGGCAGGGCTTTCTATAGCCTTAGTCACTTCGTCCCAAACTTTTTTGTGAGTTTCACCAGTCAAGATAACAGCGCGATTTGGCTGGGAGTTGAAAGCGGTGGGTGTTTCTTTAATGATGGTTTGGACGACGGATTGGATGTCGTTGATAGTAATTTCACCAGGTAACTCCGGTTTCAAAGCGTAAATAGTACGACGAGCAGTTAAAGTTTTCAAATAAGTTGCAACAGCAGACATGATATTGGATTGTTTTTTTGTATATATGTTGATATAGGATACTTCAGTCTACGAAAAAAGTACAAATTATGT…	ARS306.2	3	74000	74000	25.42	0.65	1	GTTAAAGTTTT	0	73950
GTAGATGGTACGACGGTTTGTAATAGCGTTTAAGTAGTTTCCAGTTGGGGACATTTCTTTGGCTTGGAGGTCTGGTGTTCTTGATTTTGATGGTGTATATAGCTTTAAAAAACCAAAAATGATCAACCTTTATATCTCTCTTCGATCACAACATGGGTGGAGACAAACACAAAGTAGTGATGACCCACTCAGGTGTTAAAGTGTGTCATATCTGCAAATGACACTGTATTTTTTTTTCCTTTGCCATTTATTGTCGCAGTAAGGAAAAGCGCAGAGCAAAGCTGACAAATTGAAAAATTATTCGGAAGAGCATTGACAAATATTGATTAATAATCAAGTAACACTCGCAGACATTGTTATTTCAGAAGTAAAAATATCGCAGAACAAGTTGGTTAAACT…	ARS306.3	3	75200	75600	25.42	0.65	1	AAAAATTATTC	1	75522
GCGCTTTTTTTTTTCTTCTATTATGCCGGTCAAGGAAAAAAAGAAACCAAAAAAAAATGCCGTGGGAGGCACGGATGCAAGATTTCTCCAAAGTCCCTTTTTAGCCGCCGAGGAAATGAGGAAATAAGGGGTTAGCCGCCGAGTGAAGCCGCCGAGGTATAAAAGGGAGAATGCACACCTTCGTAAGAAGATTCTATTTGAAAGAGTGCTAGGTAAAGTCATCAAAAGGCTTATTGATATAATAATTGCTTTGCAAAATGGAAAACAAATGACTTTGAAAATGGGAGAAAACAAAAATTATATAGGTAATGTTGAGTTCTTGATTTTTTTTTTGTTTCTGTCCTTGCCACAGCTCTTTTCATGGAACATTGGGCTCTAGGATAATTTTTTTATGTTTTC…	ARS306.4	3	78400	78800	25.42	0.65	3	AAAAATTATAT	1	78767
CGGCTGCCACCATAACTCTGATCGTACCGATCATTGAAACGGGAGCCTCGGTCGCGTCTCTGACGACGACTGCCATTACCATTATTACTGCTACTATCGTTATAATCATCGTACCTGTCTCTGTCGTCGCTCAAACGACGACGTACAGGTGATCTTGATCTACTCCTATCATTTCCATACATCCCTAGCTCTCTCTCCATCTTGGCGAAAAAATCCAGCTGATGTTTGTTTCCTTTTCGCCCATAGCTTATTTCTAATGGGAAATCCTCAATATAATTGATTTCATCCAAGCTTTCATTTTTTTTCAATTTTTTTCACCTTCAAGTGAATACATCACTTCCGACGATACCAAAATAATGACAAAATGCCATGAGAAGATCTTATGATATGTAGTAAATG…	ARS307.0	3	103200	103600	28.29	0.73	3	TTTCATTTTTT	0	103449
TGGATGAAACGGCACTGTTGGCATTCCAGGAAGGAGTGTCTAGTGTGGGCAAGGGAGGTCTTGTTGCGTGTCTGTGCATCTGCTTGTACGCCAACGCGGAGGTCGACGAGGAACTGCAACGCACCATGGTAGCACATGAAGAAGCAACCACCCTGCGGTGGCCGCTTTGCAATAACGATCTCAGCATTAGAAAGACTGGGTTAGTGAGCTCAGATGTTCTAAAGATTCTGTATATACGAACTATGTACTTCCATATATACCATTCCCCGTTCTTGTTAGGTAAAGGTTAAAAAAATATTTTTTATGGCACTTCGGCGATGCGAAAGAAAGTGAGTCACGATAACGGTGAGGTGATTCGTTGGATGTGCCATCGCACAAGGAATTGCTGGCGTGCTAATT…	ARS307.1	3	105600	106800	28.29	0.73	4	AAATATTTTTT	0	105652
GCAAGTTGTGAGTTTGAAATGTTCACACGTTTATAATGTCCATACTCCGTGGCGTGCATGTGTTTTAGTGTATTAGTTTTCCAAGTTATTAAAGAACTTAGTAAATTTATCATCGAACGCATTTTGATTAAGTGGCACAATAGACTTCAATGGAAAATGAAAATCATATCTGTAGCAAAAACGACAGCGAAGATAACGGTTACACAATTATCACGTTGATTCGTCAACTTAAAGATGACCTTTTTACAATTTATCAATAATAATAGACAAGAAGGACAAGGTTATATTTCAGAAAAATTATTCAAAACTAAGAAGAATGAGATGATAAGAAAAACAGTTACCAATTTAGTAGCTGTAAGATTAAAAAACTTATCCCACGAATTTGATGTAATAGAGAAT…	ARS308.0	3	113200	113600	38.75	0.07	1	AAAAATTATTC	1	113134
CTTCAAAATTGATTTCTTCAGTTTCCCACCCGGGATCCACTTGTCATGCGGTGAGAATCGTATATTGCGTATAATCCGTGTTTCATCACCCACATTATAGTACAAACCTACTGGTGTAACCATTATCATATTCATGACTTGTAGTTAAAAATCTTTCACGATAAATTGAGGAAAAAATCACGTTAAATAGTTTCATATCATTCTTTAGTTAAAGTCTGTGCATAAAAAGAGGATCGGGTGTTGTACTCGTTCTATCAAAATATTGTTATTGTTGCATTATCACACGAATTACAATCAATTTTTTTATCTACAGGCCAGAGTACCTGAAATAATGGAATTAGATTCAAAAAGGATAGCTTAATCGGTCTTTATACTAATTATTTTACGCCCAGAACGAAA…	ARS308.1	3	114800	115200	38.75	0.07	1	AATCAATTTTT	0	115195
TCTGAAGAAATTGAAACATATTGATTCTTATGGTGAGAGCAATTTATCAATGTTTTATCTTAAGTTCTACTGCCCTTGGAAATTATGTCCTTTGCTTCCCATTTTATATGGAAGAAACAAATCAGTACAAAATGCTTGGTCATGTCATAAGCTTCATCGATTTATTGACTTCCCAACTCCTTCGGCTAATATGAATTTTTTTTTCTTTATAAGAGTTTGCTATGGAACTGTCTCGCTGTTTATTTCAACGTTTCTAAAGAAAATATCCTTTTTTATTTATGTGAACTTCACTGTATACTTTTAGTACCTTTCGGTGGATTTCTTCTATTTTACTCGATCACTTTTCTTGACTGTGCACTGTCGGTACAATCCTTATTGTATTAACTTGCGAAGAATATT…	ARS308.2	3	116000	116400	38.75	0.07	1	GTATACTTTTA	0	115984
AGGGCAGAAATATCATCACCAGTAGCAGAATCAATCAAATGTGAGGCAAATAACGTATTTATTAGAGTACTTTTACCCAATCCGGATTGGCCAACAACCATTATATTAAATTGAAAACCTTTCTTCAACAGACGATGTTCGATCTGATTCGTGATGGTATCAAAACCAACATAAGAAGCAGGCTGTACTGAGCTGAGAGGATCCATTAATATATTTATAGAGTGCTTGTAGTAACCGTGGGGCTTGGCCTTGTATTTTCTTGTCTTTGCCTGAAAAAAGTTAAGTATTACTGATACATGTTTACATATATTCTATTCAGCGATTCTGATCTATTTGTGGTCTCTCGAGGAAATCTCATCGTATCATACGATTATTTCCGCAAGCATTCAGAAAGCAAAT…	ARS308.3	3	118400	118800	38.75	0.07	2	ATACATGTTTA	0	118431
TTCTGAGGAGCGTTCATCTTGGTGAGGACTTCATCAGGTAAAGTTTCCTCGACCCTGTATATATCAGCTTTACCACCAGCTGCCTCCACACCTTTCTTAACAGCTTGGGCTAAAACGTCTATGTGCCCGTAGGTAGAGTAAGTAATTATCGCAATCTTTACCATTCTTATAGTGCTTCAATTGAGTCTGTATTGTTTTGTTTACTCTCTTTTTTTTTATTGATACTAACCTGACCCCTCTTTTCCTTTTTCCTCTTCTTGTTTTCTTTCTGATAAAGTTTACAAACTTCAAATAAAAATGAACGTAAAACAAGTAAAAATGTAGGATGTTATAGTATCAACTAGCTGCCGGAATAGTGCAAATTGTATGAATCGAAATAAGTACGCTAGCCAAGGCAGT…	ARS308.4	3	120400	120400	38.75	0.07	2	TAAAAATGAAC	1	120443
AACAGCCAGTTATTGAAAGTTTGCGAACGTGAAGTAAAACTGCAAAATGGTCGTTTTAAGTCAAAAGTAACCCTGCGTCACACATGAGAAACATTATCGCTAAGTTGTTGTTACTACTTCTTGTAATTAACTTACTGTCGCATTCCAAATGGACTGCGAAACAGACACGAAACAATTACGAAAGTGACGACAGAGTAAATATTGTCATTAAAGAGAATGATGACCTCCGGGTAAACTGTGAGAATAAGTCTAGACCATTCGTTAAACTTCATCTTTAATTGAGAAGCATAGTAAAAAATAATTAACAAGTTAACACAACTATCTTGACCCATGCTACCAAGGACATAAGTAATATCCTCCACCACTTTTACTCAAAGTATATCTCATTCTGAGAAATGG…	ARS309.0	3	123600	124000	36.36	0.32	1	AAAAAATAATT	1	124033
GTTTTCTATATCACAGCGTTTCCTTTTCTTCTCTCACGTCTGCCTGTTATTAAATTTGTTTTCCCTTTCTTTTAATTCGGATTCTCATAATTGTTCAAAATCCGCGCATTTGGATCGTCCAGCCCCTGCAGCGCCCAGTTCAGCCAACAAAAATTCATAGGGACGTAAAGGAAACGTTTCATGTCTGTTACAATGAAAAAGACAAGTCGAATCACATTATGAATGGCAAACGATAGACCTTTCGTTGCCTTTCAATTACATGATATTCGTGGCAACATCTTCTCCGCTAACCTAAAAGTTTTATCAGAAACATATATCTTATTTTTTCTGAAGTAAAATCAAAGTGCAGGGAAGACAAGTAAAGGAGTCAGCAAAAAAGTGAAGTAAACTTATATGTTA…	ARS309.1	3	131600	132000	36.36	0.32	5	TAAAAGTTTTA	1	131875
GAAAAAAAGCTGTAAGAAAATGCAGTCTTCCCCAACGTTTGTTACCCCAACAATACCGAAATAGCCGCCCAACCGCAAATCTGGCAAAAAATCTTTTCGTATCTCGCTGCAGATGACCTTCCAACCCGCCCCTTTTTGTAGTCACGCCTTTAAGGGCCCTTGTTTGGCTTGCTCACATGGGGCTACACGTAAAAACCGTAGCTTGGAGAACCACTCAGCCGCTCGCCTATTCCACGGAGCTCCGGATCAACGGGCAGTGGACCCTCTCGAAAATAAGGAAAGTTGCGGGGCCAAAAATTATTATTTCTTATGTAAAAGAAGAGACTATATACGACGCCTATCTACTTTTGTTCCACAACTATCCACTTAAGGGCTAGATACCCCATTATTAAAAACACC…	ARS309.2	3	133600	134000	36.36	0.32	1	AAAAATTATTA	1	133671
TTCTAGGGGAAGTGCGCGCGGATACCGAATCGGCCATCGAACCGGCCACCCGGATTGAGTTTGGTATGTTGCCTCTTTGCGCAATTTTATTGAATGCAAAGTTTCTCCTTCTAGTAAAGGACAACAGCTGAAAAATGCTCGATGTCCAAATGACGACATAAACCTCCTCGTTTAGGAAAGAGTTAACACGCCTAGTTTCAGCTTGTTTCTTTTTATTGTGTAATTAGTTTTCTTACTTAGTACATCTTATTGACCCCACTGTCATCGGATGTGAGAGAGTGGTTCACTTCTGAATTAAGTTTAGAGATATACTAAATCTAAATAAAAGTCTCTTTCTGCGTGCATATGTTTTCTTGCGCGGGACTCACAAGGATGCGTCTTTTATTTCATAACGCGGTT…	ARS310.0	3	163600	164000	36.93	0.46	1	AATTAAGTTTA	0	163984
CAAGATCAGAATACGTCACCCAAAACAATAAAAAGTGCCTTATTTTATTTAGAAAAGACAACACATCCTTAGATTTTAAAATCAAAAAGTCCATATCAAGATACACTTACAACCTCAAAACGGATAGAGAAGAAAATGCAGTTTTCTATCGAAATAATTTAAATCTTTTGATTTTTCATCTGAAACATACACTGGAGATACAATCAAATCCAAATTCGTCCTGCAAGTGGTCATCGGACTTTGCAGAAGATTTTGATGGGATGAAACGGAGGCTTTTGCCTGCTTGGGAACCAAAATATGAACCACTCATTAACGAGGAAGATGCTAATCAAGATACTATAACAGGTGGTAACAGACAAAGGAGAGAAAGTGGAAGCATTTTATCCTACGAATTTATCG…	ARS313.0	3	183200	183600	43.43	0.01	1	AAAATATGAAC	1	183437
TGAATAATTCGGATCGAAGCATGAAATCTTCTTTCCAAAGCGCTTCAAGACACGAAGCACAGCTCGAAGACACTCCCAGCATGAACAATATTGTAGTACAAGAAATAAAACCGAATATTACTACGCCAAGATCGAGTTCTATTTCTGCATTACTAAATCCTGTAAATGGGAATGGGCAATCAAACCCAGATGGAAGGCCGTTGCTGCCATTTCAGCATGCTATTTCTCAAGGCACTCCTACTTTCCCTTTACCGGCCCCTCGCACTAGTCCAATAAGTCGTGCGCCTCCAAAGTTCAATTTTTCGAATGATCCGTTGGCAGCTTTGGCTGCGGTTGCCTCCGCGCCAGATGCAATGAGCAGTTTTTTATCTAAAAAGGAAAATAATAATTGAACAAACG…	ARS313.1	3	190000	190400	43.43	0.01	1	GTTCAATTTTT	0	190064
TTTCTGTTCGCACGAAAGCCCTGAAGTACAATTCCTTCCGGCTATTCAAAATGTTTCGGTTGTTGATACTACAGGAGCTGGAGATACTTTCCTGGGCGGTTTGGTTACTCAATTGTATCAAGGAGAGACCTTGTCTACGGCTATAAAGTTCTCTACATTAGCTAGTTCATTGACCATTCAAAGAAAAGGTGCTGCTGAAAGCATGCCACTGTATAAAGATGTTCAGAAAGATGCATAAAATCTACTGCAATTTTTTACTTTTAGTTTGTTAAATTTTAGTTTTCGTCATATATATAAAGTTTAAAAAGGTACAAAGAATGCAGTAATAAGAAATGTAATTACATGAGGGCAGTTTAAGTGCTACCTTTTAAGACGGAAGAACTAATACCATAACCGAGA…	ARS313.3	3	194400	194800	43.43	0.01	3	TATAAAGTTTA	0	194347
GCAAAGTTGTCTCAAGAACGTAGGACGATAACTGGTTGGAAAGCGTAAACACGGAGTCAATTGTTGTATCGTTGTGTTTGAAATGTCTTGTGAATTCTATTGTTTCAATATCCAAGTAAAGAGAAGATTCTAAGAGAGTCAATGTCTTTGCAAGTGACCATGGAGATACGTTTAGAGCGAAGGCTTCGACTTCTAGAAGTTCACCCTGTTTCCATTGGAAAAGTAAATCACTGAGGTCAGTTGCACCGCACAATTCATCATTTGCGTTCGTTTTGTCTATCTCGTATTGGAGAAATAAGTTTTCGTAGTCCAGGGGCGGTTTATTTTCTTCGATTTCCTTATCAGTTAGACCAATGTAATGAATCTTCAATTGCCTCGTTCTTTTTTTGTTTATAAACA…	ARS314.0	3	198000	198400	82.5	0.01	3	AAATAAGTTTT	0	198437
ACTGCACGGCTGCAGATTCAAAAGCTCCAACGCCCTCAGCGTCATCTTCGCCTGGATATGCTGCACTCTGGTCGAACCCGTGTACTTGTGTGCTTCGCTATCATTATAGAAAATCTCCGGTGGTGCCAACTCCTCAGGACGTGACATTATTTCTTCTCTGATATATTTCCTGTGTTTCCGTACCGCACCTTTTTAGCACTACTTTTTTACTATGCTCTTCTTCTTCTGCTTCTTCTGCTTTTTTCCTCTTTATCACACTATGTATGTGCTGCTCATCTCTTCTTTTTATCGATAAAATTGAAAAATGTGAGATGGTGTAGAGTGAAAAAAAAAAAAAAATCTGGCTTGGCCATCAAATACCCGGCCGTGGTTGGACTCGTTTAGCGAACAATAGCACCC…	ARS314.5.0	3	211200	211600	36.67	0.21	1	TAAAATTGAAA	1	211685
TCGGCGGCTGGATCCCCGCCACGCAAGAGTGGTTCCACCTGCTCTTCGACATGATTCCGGGCTTCACTGTTCTGTACATGCTCACGTTTTACATGATATGGGACGCTTTATTGAATTGCGTGGCGGAGTTGACCAGGTTTGCGGACAGATATTTCTACGGCGACTGGTGGAATTGCGTTTCGTTTGAAGAGTTTAGCAGAATCTGGAACGTCCCCGTTCACAAATTTTTACTAAGACACGTGTACCACAGCTCCATGGGCGCATTGCATTTGAGCAAGAGCCAAGCTACATTATTTACTTTTTTCTTGAGTGCCGTGTTCCACGAAATGGCCATGTTCGCCATTTTCAGAAGGGTTAGAGGATATCTGTTCATGTTCCAACTGTCGCAGTTTGTGTGGA…	ARS314.5.2	3	213200	213600	36.67	0.21	1	ATTTACTTTTT	0	213533
GTATGCAAGACTATTTGTGGAATCGAAATGGCCCTGCTGCTTCAAGATATACGATTCCGATTGCCATTCGTAAACTAGTAATTGGCCCAGTTTGCTGGAACCAAACGCCAGCCATTCGCCGGTTTGGTTGACGCTAACGGTGTTGACTGGGTTTTGCCCCATAGAAAGCTGTTGAATCAAAGTGAAATCAGGCAAATCGTAAAGACGGAATTCCCCACTAGTAAATCCGACAGCTAAAAGCCTTGTTGCTGGATGGAAGGTGACACACTTTACTTTGGCTTGGTTTGCGTAAAAAAAATGTTTCTTTGTGATTCTCCAGCTGTATTTCGAAATATCTACTTCTTCTTGCTTGTCGTCGTCTTCACTTTCATTGTCGTCGTCATCGGATGGCCTCTTGGT…	ARS315.0	3	222400	222800	35.13	0.54	1	AAAAAATGTTT	1	222456
CTAACAACGGTAGCACTTGCATCTGCAGGGTGCCTCGTGCACAGTTAGAGGAAGAAGCACGCAAAAAGGGCACACAGGTGTCCTTCCATCAGTGCGTCCACTGCGGCTGCCGTGGATGTGCAAGCACAGACTAACGACTATATGCACGTTGCAGTATTGTTCTGGCCATGTAATTATCTCTCTCCCAACGTTTTAGAAGAGGTTTTCGTCTCCTTCGTCAAAGACGACCACTTTCCCATTTTGGTCATTGGAACGCGAAAAAACAAAACAGACGCGAGAACGCGACGCGAAAAAATATATTTTTCCGTTTTTTTTTTTTTTCGGAACAAAGATAACGCGTTAAAACCTGTGGATGTAATAAGGATCTGAAACACTGACTAAAACGCGTCCTCATTTAAA…	ARS315.3	3	228800	229200	35.13	0.54	3	AAATATATTTT	0	228944
TCATCATTGGCTTGTAGAGTTTATAAATAAGATGGAAAACTTCGAATTTTTGCCATTATCTTTACATATTTTGATGATTTTTTGGAACGACATCTGCCAAATTGATACAAATGCTCCTGTTGCGGCTACAATAACATCAAGTCAAAAAGAGCCCTTCTTTCTGGTAACAAAAATCACTGATATGCTATTGCACAAATATTATATTGTTTCCAGCAGCAAATCAATGATAAATGACGAGAACTACATCATCAATGATATAAAGAAAAACAACAAGATAAAGTTGAATATTCTCAAAATATTATCCAGTTTAATTTTGAAAATTTTTCAAGAACAATCTTTAGAGGTGTTTATATTTCCCACATCTAACTGGGAAATTTACAAGCCCTTACTTTTTGAAAT…	ARS316.0	3	255200	255600	40.78	0.04	2	AAAATATTATC	1	255440
GTTCTTCAGGAGATTTAATATTGAGTTCAACTATTCAAGCTACTACCAATGACCAAACTTCAAAAACTATTCCAACTCTTGTTGACGCCACATCGTCATTACCACCAACATTGAGGTCATCCAGTATGGCACCAACAAGTGGTTCTGATTCAATCTCACACAACTTTACGAGCCCCCCCTCTAAAACAAGTGGTAACTACGATGTTTTGACTTCAAACTCAATAGATCCTTCTCTATTTACAACTACGAGTGAATATTCATCTACACAATTGTCGAGTTTAAATCGGGCCTCAAAAAGTGAAACAGTTAATTTCACTGCTTCTATTGCTTCCACACCATTTGGTACAGATTCGGCTACTTCTCTAATAGACCCCATTAGTTCAGTGGGTTCTACAGCAT…	ARS316.2	3	268000	268400	40.78	0.04	1	AAAAAGTGAAA	1	268451
TCGAACCTCAATCCTTCGAAAAAATTAGACTACTTGGCCAAGGTGACGTAGGTAAAGTGTATTTAATGAGGGAACGCGATACCAACCAGATATTCGCCCTGAAAGTTTTGAATAAACATGAGATGATCAAGAGGAAGAAAATTAAACGAGTACTCACTGAACAGGAAATTCTCGCGACAAGTGATCATCCATTTATTGTGACACTGTATCATTCCTTTCAAACCAAAGACTATTTGTATCTCTGTATGGAATACTGCATGGGAGGGGAATTCTTTAGAGCCTTACAAACAAGAAAAAGTAAATGCATTGCAGAAGAAGATGCGAAGTTTTACGCCAGTGAAGTAGTAGCAGCTTTGGAATATTTACACCTACTGGGCTTCATATACAGAGATTTGAAAC…	ARS316.5	3	275200	275600	40.78	0.04	1	AAAAAGTAAAT	1	275646
TACTGCAGTTGCACCGCCCCATAATAAGATGGGGCCGTTTCTTTGTGGGGTTGATGGCTCCCACTTCAGGTTCAAGCCCAAGTTATAGGTCAACACCAAGCCAGCTGTGGTCAGTGACACTGGGATAGTGGCTGCCCCTTCCAAAGACCTGACAGGGCCGGCAGGTAGAACATCTTCACCCAAAAATTTGAGTTCATTGGGTGATTTGTAGGCAACCACAGTTGAAATAGCAGAATATTCAGCAAAAGCACCATTGGAAGGAAACCTTACGGAAGATCCGTGAATGAACCCATAAATATAATCACCAATAGAAAAGTCTTTAGGATCGACGGCTGGGCCCAATTTGACAATTTGGCCGGCAGCGTCACATCCCAGAATAGATCCTTGAGGCCCGACCTT…	ARS318.1	3	305200	305600	33.37	0.01	1	TAAATATAATC	1	305218
ATCCCTTCTATCCTTTTATGGACATTTCACTCTTTGAGAGCGATCTCACTAGTTTGCTTTTACAAGACGACAATAATCGTTGGAAAATTAGTACTGAAGTTAAAAATGTGCGCAAAAAAATAGAAACTTTGTCATTACTTACAATAGTAATGGCCATGGCCTTGATGCATTCAAAATTGGATGCAAATCTTCTTTCAATGGTAAAAGAAAATGCCTCCGAAAGTGCCAGGAAACTTTCTCTTTTATGTCATAAACTATTATGCCTCCTGGATGTATTTCGCTATCCAAATGAGAACACTTTTACTTGCCTTTTATATTTCTACGTTTCAGAGCATTTAGATCCCGAGAGTCCCGATTGTGTACTGAGCCCCACTAACTTGCTTACTCTGCACCATCTTT…	ARS319.2	3	312000	313200	48.52	0.02	5	GAACACTTTTA	0	311951
CGAACAAACAGATGCAGAAATCAAGATTAGTGAAGCATTGGCCAAGATTGCTGAGGAACATGGCACTGAGTCTGTTACTGCTATTGCTATTGCCTATGTTCGCTCTAAGGCGAAAAATTTTTTTCCGTCGGTTGAAGGAGGAAAAATTGAGGATCTCAAAGAGAACATTAAGGCTCTCAGTATCGATCTAACGCCAGACAATATAAAATACTTAGAAAGTATAGTTCCTTTTGACATCGGATTTCCTAATAATTTTATCGTGTTAAATTCCTTGACTCAAAAATATGGTACGAATAATGTTTAGATAATTTTTCAGTAATCAACTACGCAAGTAAAGCAGTAAATACGTTACTGCTGGTATTAATGTCATGTATTGAGGCAATGATGCTATGCTCTTAA…	ARS319.3	3	314800	315200	48.52	0.02	7	AATAATGTTTA	0	314965
AGTTGCCTGCGAAGACCCTTCTGCCCGCTGCGCATTTTCTTAGAAAATCAAAAAAATTGCCTTTTCATCTTTTACCTTCCGAGTTGAATATGTTGACTATTTGCAAACAGGCGTATGATTGTCGTATATAACAGGGCACTTTCGGCAGTGAATCAATAGGAGGCGTATAAGAAAAGCCAATTAGTACCTATATATATATATATATATATATATATATATATATATTCCTTTATTATAATTCCTATCAGCGATTTTTGCATCACACCCAAGAAAAATCTATAATAGAGACACAAAAAAATGAACGTAACTGAAAATGCTCTATTGTTTAAGTGCGGTAGCAAGGGCTATATTAATCAAACCTATACGCCGACAGAAATTTATAATTGTGGGGTAGCTGAA…	ARS402.5.0	4	20400	20800	59.08	0.01	2	AAAAAATGAAC	1	20628
AATACGGCAATGGGTAAGATTGGCCTGCTTTCATTCTGGACAGAATTAATATCAGATATTTTTACACCTGATGCAGTTATAAGGTATAGTAAAAAGTCTATGACAGATTATAGAGAATTCGAATTTATCATCCCAGTGTTCCCAGTTATTTGCTCTACATTAGGCAGATTTGGCATCGTTAGAATGGAAGTTAAGGTTTTACAATTGAAAACACAAGTTCTAAGTAATTCTACGATTTTTTTCAACTGTCCTCGTGTCACATTTGTCTATTATTATCCTGATGGTTCATATATTACACATTTTTCCCAAATGAAAGGTGCTTTCGATTTGGACTTGAAAATTAATTGGCTGGACGTATCTATGCATAGTTTTGTCCCTGATATTGAATGGAATGCAGTG…	ARS404.0	4	37200	37600	43.65	0.04	1	TTACACATTTT	0	37565
AAAGTCCTCTACTTCCTCCCAGTGTTTGTCCTTAACCAAATTTTCCAGCCGCATTTGCGATAAGGATGCCACGGATTGTTGTGGGCTTCCTGCAAAGCTAAGCCCGCTTATACCGGCAGGATTCTTATAGTTAAGTTCATGTAGTGACCTGAGTGATGTTTGAGAGTATGAACCTTTCACAATATCAGGATCAGGAGTGGGACTTCGATCTCGCTCATATCTTTTCATGAGGACCTGTTACAATTCCAGCACTATACTGTACATGCTTTCCTTAGTGGAGCACAAAGCAAGTTAAAAATGAACTTTAAATTGATTAAAGTGTTAGTGACGCTTAAACTCGTTTTCCTGCGCGTATTTCACGCAATCTATACATAATCATCTTTGATAATGTTATATCGC…	ARS404.1	4	42000	42400	43.65	0.04	1	TAAAAATGAAC	1	42308
AGACAGCTATATAAAAGTTCCTAATTGTGCATTTTTTCAATAACAATACTTATTCATCCTTATAATTATATTCTAGCTTCGTTGTCATGGGAACATAGCCCATACACCGCAGTTATTTATGATCATTTCGAACGGGAAGTATGGATGAATCTTTTTTTTTTTTTTTTTATAGCACGCAACTGAAAAAAAAAAAAAGAAAAATTTTTCATCTTCGCTCGACGTTTCTTTTGTAGTACTCATCTCTTTTTATATAAAGATTAATTAGTTATTGTCGCTTTGCTTTTCCTTCTTTAAAAAATGTTTCTTGCTTTTGGATTTTCAGATGTCCCAAGATCATTACAGTATTTTAATTGAACAAAATGGCTGAAGGTGTTTTCCAAGGTGCTATCGGTATCGATT…	ARS404.2	4	44000	44000	43.65	0.04	3	AAAAAATGTTT	1	43997
TTACAGTCGTATGTAAATTGACATTGGACTTTTCTTCCTTCAATGATTTCCTCCCTAGCTGACCTGGTCGTCACAGTAGCTGACATACCAAGAGATCTTGAAATATGGACAATTCCGTCCATAATGGATGAATAAACAGTTTGAATTGCTATTTTATAAGATTCAGGGCCTTCGCCCTTTTTCACAACGTACCCATCTGAGTCGATCAAGCCGGCTAAGAATGCTTCACGAACTTCTATATGCTCGCCGTACATAAATTCAGGGATTTGCTTCTCTCCATCAAGATCCCTTTTAAACTTTAAAATTGTGACAGCTTTCCAGAATGGATTATTTTTCCTCAAATTCCTTGTCTTCCTGTTTTCATCTGGACCATCTCCATAATGAAGCCTTACATGTTTG…	ARS404.3	4	46800	47200	43.65	0.04	1	TAAACTTTAAA	1	47130
TTACAGTCGTATGTAAATTGACATTGGACTTTTCTTCCTTCAATGATTTCCTCCCTAGCTGACCTGGTCGTCACAGTAGCTGACATACCAAGAGATCTTGAAATATGGACAATTCCGTCCATAATGGATGAATAAACAGTTTGAATTGCTATTTTATAAGATTCAGGGCCTTCGCCCTTTTTCACAACGTACCCATCTGAGTCGATCAAGCCGGCTAAGAATGCTTCACGAACTTCTATATGCTCGCCGTACATAAATTCAGGGATTTGCTTCTCTCCATCAAGATCCCTTTTAAACTTTAAAATTGTGACAGCTTTCCAGAATGGATTATTTTTCCTCAAATTCCTTGTCTTCCTGTTTTCATCTGGACCATCTCCATAATGAAGCCTTACATGTTTG…	ARS404.4	4	47200	48000	43.65	0.04	1	TAAACTTTAAA	1	47130
AATGATCTGGTCTAGATTGGTTCTTCTTGCCCAGCTCAGCAAAATAAGCTTCGTTCTTCTCCTTTTGAAAATTGGCACCATTACTAGAGTTTGCTGGTGTTGCAGATCGACGGTTCTCCAGTGGTGTCCCTTCTCGACTTTGAGCAACACCAGGCGTAGCGGATGCAGCGGTTTGAGAGGTTGCTGATAACTTGGAAGCATCAAAATCCAAATGCTCACGCTCTTCAAATACTCTATCTTCGCAAAGACATGTTAACTTTTCTTTATAATCCTCTGCGACGGGGTTATCGTATTTCACTTTTTGTGGTAAACTCAGGTCAATATTATGCGACTTGAACCATTCAGTCAAAGGTTCGTTACCACCTTTTTCCATACGAAGAAGTTCCTCCGGTTTAAACT…	ARS404.6	4	51600	52000	43.65	0.04	1	TTTCACTTTTT	0	51858
ATTGCGCAGGCACCTGCACCTGCGCCTGCGCCTGCGTGTCGGTGCTAATGTTCTTCAAACTCCATACTGCCATACCTGGGCTGGCGGTCTTGTCATTGTCCCACAGGATCCTTTCAACTTCGACGGAAATTCGATCAGGCTTTTCCAGTAGTAAAATATCCGATATCTTGTCGCTTTGACAGTTTAAAACACCGAAGAGCTCACAGATTCGCTCTCTCGTCGGGATAACGATCTCAATGCAATTGACGCCTGGCACCAGGACCTTGTCTGGGACATTTGGTAAGAGCTGCGTAAAATATAATTTCAATGTGCAATATTTGAACTCATTTATACTGGCGAATTGAGGTGGATTCATGCCAACAATTTTGCCCTCTAACCTTTCAACTGAGCCTACACTAG…	ARS404.7	4	63600	64000	43.65	0.04	1	AAAATATAATT	1	63851
TACATAAATCTAAACATATAAACACCTGTGTAACTCGTTAACGTCTGGGCTTCCATGCTTCTACCATTTAGAATGATGTAGACCATTTATTCCAAGAGGATAAGCACCCTCTGTGATTCAAAATGATAATAAGTGTTGACGACAAGTTACTCTCGCAGAATTGTTGTCAACAGTCTTGTATTAGTTGTTATCCAACGCTCCCGTTTTCAAGTTCACTTAGCGCAAGTGGTTTAGTGGTAAAATCCAACGTTGCCATCGTTGGGCCCCCGGTTCGATTCCGGGCTTGCGCAAGTTTAATTTTTTTTCTTTTTCCACATTGTTTTCCACTTTGCACTCATTTCCAGTGTTTATTGTGAATGACAATTTCTTCAATCATTGAAATGATTGATTTTTTGGGAT…	ARS405.1	4	83600	84800	40.83	0.02	3	TTTAATTTTTT	0	83620
TTCCCCGCAAACCCTTGGGACCATTTATTATACCATATATTAAACGTCAATCCAGTCTGCGCCGGTATAGAGGAGGGCAGTTCTGACTCCTTCACTTGCACTTTCGCGGATTTATCCCTCCAAGATGTCATCCAAATTTCTATCAATGCGTATACTGTCTTACTAACGTCGTTACTACCTTAAGGCCCATCGCCAGTAGTCTTTATTATGATCCAGCCTTCAATACATAATGGAAAATTTCATCATTACCCGCATATGTACGTATGTAACGATGGAATGCTCAAAAACTGAAAAAAATTTTTCTGAAAAAAAGTGATGAGGAATAAAGAAAAGTAAAAAACGAATGCATGATATAGTAGTAGTAAATGGTCAATGGATCATTGGGTAGCAGAGAAACGG…	ARS405.3	4	87200	87600	40.83	0.02	4	AAAAATTTTTC	1	87387
AAATTATTGCAGCAGAAGGATAAATTGGGTAAAGCAGTTACAAACTTTGATAAAATCTCCAAAATGTTTTGGCATTATAAAGACAAAATTGCTCAAATAAAGCAAGACATAGTTCTGCCTATAAAAAAAGCTGATGTGAATGTAAGGAATTTGCTCTCACGTCATAAAAGGAAAATTAACCCGAAATTCGGACAATTAACTAATAGCAACCAGCAACTTTTTAAAATACAGAATGAACTAACTCAATTGATAAATGATACTAAAGGCGACTCTCTAGCATATCATTGGATTTTAAACTTTATTGCCAAAGCCGTAGTACATCAGGCGGAAACAGAAGTCAGGGTAAAACCAGAGTCTGCTCTGCCCCTAGGGAAATTGACTTTATATTTGTTAGTCCAA…	ARS405.4	4	88800	90000	40.83	0.02	2	TAAACTTTATT	1	89229
TCTGGTGAATAGGAAGACAGTTTGTCCTCACCACCTGAGGACCCATTATCGTCTGTCTTCGCGCTCCCAGTGGGTGGTTGGTTGATTTTTTGTGGTGGAACAGGATTATTATTCAAAGGTCGTATTGGAGCTTTTTCCTCGGTTCTGTAAACTTTTTCCTGCAGTATCCTAGATTCAGATTCCTCATAGGGTGGTGGCGCTGAGTTGTCCCTTACAGACTCTGATATTCGATTTCCACTGCTTATTGATGCATCTTGTACAGCTGGTGAACCCAAACTCTCTTTTGTAGAACTAAAATTGAAAGGAAGTTCATACCTACTACCAGTACTGTTGGTGCCATTATTGGCATATCCTATTTCACCTGTTGGCTTGGAATTAAAAATGTCCATGCCGTTATTA…	ARS405.5.0	4	97600	98000	31.93	0.01	1	TAAAATTGAAA	1	97541
TGGAGGAATCACATTATTGATTGTGGGAAGGGTCATTTCAGGTATCGGTATAGGCGCAATTTCAGCGGTTGTTCCATTATACCAAGCAGAAGCTACACATAAATCATTAAGAGGTGCTATTATTTCTACTTACCAATGGGCCATTACCTGGGGCTTGCTCGTGTCAAGTGCAGTGTCGCAAGGGACACACGCAAGAAACGACGCATCTTCGTATCGGATTCCCATAGGGTTGCAATATGTCTGGTCGTCATTTCTCGCTATCGGGATGTTCTTTCTCCCTGAGAGTCCACGCTATTACGTTTTGAAAGACAAGCTAGATGAAGCAGCTAAATCTTTATCGTTTTTAAGAGGTGTACCAGTCCATGATTCTGGGTTACTGGAAGAACTAGTTGAAATAAA…	ARS405.5.3	4	111600	112800	31.93	0.01	1	TATTACGTTTT	0	112446
TGGCACCCCAATCCCTATGTATCCCCCATACCAATATCAATATCAATACCAATATAACACTCAGTATCACAGCGGGCCATATAGCAATACACCAAGCTATAATTCTAACAATTACACAAGATCCTCAGCAAATAAGTACCACCATTTTCAAGGAAAAAATTCATATTCTGGTGCGATTCCGAAACGTAGTGATGACAGTAACAGTAATAAGAATGAGGGAATTCGTAGGGCTAGTGTTGAGGGTTCGCCGTCATCTAGGGATACTGATTCGGTAGAGATGAAATTTGATAAATTAAACATTTAGCGTGAGGAGTGAACTATACATAGCGAAAAAATTACGTAACGGTTTATAGAAATTCTAGTATGAGAACAGTAATATATGAGAAAAAGTTGTTTTCA…	ARS406.1	4	123200	123600	37.35	0.12	1	TTAAACATTTA	0	123577
AAAAGGTAATTGGTGTCAGGACAAGGACCACCAATCTTGAAAAGTTCTAACAAGTCATGGAATTGACCGTGTACGTCACCACAAATGGTAACAGGCACGTTAATTGGTTTAACATTCTCCTCGAACTGCAACACGTCCACCGCCATTTTACATAGTCGTGCTACATCGTCTTCTGATAGTGGCTCGCATTTACTCAAATGCTCAATCCATTGGTCAAGCTGATTTATATTTGTATTGGTCAGTTTTAGTGGTTTGGAGGATTTATGATCTGCTATACCCGAGGACCCCGGTTTAAAATTAAAATCTTCCAACTCTTCATCTGTGTCTTCGTCATTAGAACGCGCCTTCGTATTATTTTTGCCGTCATCACTATTCATGTCTTCGTCGAGAGTCGGTGAT…	ARS406.2	4	124400	124800	37.35	0.12	3	TAAAATTAAAA	1	124841
TTTCGTGACGAGGAAGAAGGTGTACGAACCGAACACAGTGCGAGTCAAGATGACCAAGAGTTGCAGCTTTTCGAAGAAGATCTCTTCTCATTTCACCTAAGCCCAAATGATATGTCAACCAGGAACAGCGAACATCAAGTGCAAACACCGGTGCTTTTCCCGTACGAAGCTCCTACTCGAACAAAACAAAACCCAGCAGAAAGAAAAGTCATTGAAATTGGGGACGGCGAAGAACTCTCTATCTATCGAGATGTTTATTCCAATCCTATTCCTGTCAGCTACCTAGATACCTTAAACTTGAACCACTCCATGTCTGTACGGCAAACACAACAGCAACAACAACAGCGGCAACAGCAGCAGTATGTAGACTCTTCATCGGCATTTCAATGCTGTACAGAC…	ARS406.3	4	126000	126400	37.35	0.12	3	TAAACTTGAAC	1	126303
AGTTACAAGAATTGAAGGAAGACGATTATTATGGGATTACTTTATCTGATGATTCTGATCATCAGTTTTTGCTTGCCAACCAGGTTGTCGTCCATAATTGCGGAGAAAGAGGTAATGAAATGGCAGAAGTCTTGATGGAATTCCCAGAGTTATATACTGAAATGAGCGGTACTAAAGAACCAATTATGAAGCGTACTACTTTGGTCGCTAATACATCTAACATGCCGGTTGCAGCCAGAGAAGCTTCTATTTACACTGGTATCACTCTTGCAGAATACTTCAGAGATCAAGGTAAAAATGTTTCTATGATTGCAGACTCTTCTTCAAGATGGGCTGAAGCTTTGAGAGAAATTTCTGGTCGTTTGGGTGAGATGCCTGCTGATCAAGGTTTCCCAGCTT…	ARS406.4	4	128800	129200	37.35	0.12	1	TAAAAATGTTT	1	129191
GAGCGTTGAAGTAAGAAAAACAAACGAAGAACTGAATAAACACAGCCTGCTTCAAATTATGGAAGGAGCTGTTACACATGGTAATTTTCTTATTTTTTTTGATAGATGGTGGAAAGTGGTAGCGTGGAAGTTGCGGATTATCACGACGTTTTATGGGCTCTAAATCGGTATAAGCTCAACAAATGGTTGAGGGCCGAATTAACGAAAAATTATTAGACCATAATTGCTACCAGCTGAAAGATTATCTCATTATAATACGCTTGAAACCCTCTAAAATGTCATTCGTAGTTAAGTACACTTTTTTGATCTCTCCAAGGTTAGCCGCCCATATAAAAAACTCTAGGAACCAAATTTGGTATACTGCGTGCGCTTGAGATTCAGTTTTTGTGTAAATCGGTT…	ARS407.0	4	132400	132800	45.49	0.08	1	GTACACTTTTT	0	132383
ATTTTCTTGCCAATGGCCCACGAGAATGATGGTATATTGTTTGCTATTCTTGCTTGGTCAGCTAATCATTTGTCTATATCATCATCAAATGAGCTGCGAAAGGATGAAATATTTGTCAACTTGGCGAACAAGTATACATACATGTCGTTATCGCATCTAAAGACAAACGAGGGCTCAAGTGCCTGTGCTAAACTGGGGTTTCTATATTCACTAGCACAAATCCTAATCTTATGTGGTTCAGAGATATGTCAGGGTGATGTGAAATTTTGGAAGATATTATTGAATATAGGAAAAAATTTGATCGAAAACCATGTGGGCAAGGATGTCTCACGGATACTAACCACTACTACAGAAGAACCCTCCCTAGAGGAGAGGATAATCTTCCCCAATTTCAATTCC…	ARS408.2	4	156800	157200	49.01	0.01	1	AAAATTTGATC	1	157044
ATCATGTCGAAACAATTTGTTAGATCTGCGAAGAATTTGGTGAAAGGGTACTCTTCTACCCAGGTCCTGGTAAGAAATGCAACGTCAAACGACAATCATCAAGTGTCCAAGGACTCGTTAATTGAGCTGGCTGAAAAATCATATGATAGCGCAGATTTCTTCGAAATCATGGATATGCTGGACAAAAGACTTAACGACAAGGGCAAATACTGGAGGCATATCGCAAAGGCATTGACAGTAATAGATTACTTGATCAGGTTTGGTAGTGAGAATTGTGTTCTTTGGTGTAGAGAAAATTTATACATCATCAAGACATTGAAGGAGTTCAGGCACGAGGACGATGAGGGCATAGATCAAGGTCAAATCGTTAGGGTCAAAGCAAAAGAATTGACTGCATTA…	ARS408.5	4	168000	168400	49.01	0.01	1	AAAATTTATAC	1	168002
ATCCCTGAAAGCACTTTACTTCACGTGGGTACTATTCAGGTTTCTGGGCGTGGGAGAGGTGGTAACACTTGGATTAATCCTAAAGGTGTTTGCGCATCAACGGCCGTCGTAACAATGCCGCTTCAATCGCCTGTGACTAATCGAAATATATCAGTTGTTTTTGTCCAGTATCTTTCTATGCTTGCTTACTGTAAGGCGATACTTTCGTACGCTCCTGGATTTTCAGATATTCCTGTTAGGATCAAATGGCCCAATGACCTTTATGCTTTGAGCCCCACCTACTATAAGCGTAAAAACTTGAAATTGGTTAACACCGGTTTTGAGCATACAAAGTTGCCCTTAGGTGATATCGAGCCCGCTTATCTTAAGATCTCTGGTTTATTAGTTAATACCCACTTC…	ARS409.1	4	204400	204800	36.04	0.04	1	AAAACTTGAAA	1	204548
GCAATATCATTATCCATATAAGTGGCAACATGAAATTGTAATAAACTCTCTGCTTCTTCAATAGCATGATGTGGAGCACCGTTATGCTCTAGTGTTTCCAAACTAATATTAGCTTTTAAAATATCAGCAAGTTTAAAGGTTAAATCATCCTCACCTCTTTGAGATTCATTGAAGGAAATGGATGGACGCACCGGTGGTGGTGGGACAGGAAGGCATGTTAAAATCATCCATTCTGGACGAGAAAAAACTTCGTTGAAACCCAAACTAGTGAAGTCTTTTACTGAGATATGCTTAAAAATATTCAAGATTTCCTCCGTACTTAAAACTCTTAGTTCTGGTTCATCCGCATCCCCCGTGGCTCTATCTTTTTTCCAACTACCAACTAATTTCAACCCATCC…	ARS409.4	4	209600	210800	36.04	0.04	8	TAAAAATATTC	1	209927
GAAAAGATGACAGTTACTTAAAGTAAAGCTTCACAGCTTCAGACAAAAAAAGTATGAAACTTGTGAAGATGTTTTTATGCTGATCCGGCAGACGGCCATTCCATTATTTAGTTCTGATTTTAGTGGAAAAACTTTCGAAACTTAAAATAATAATAGCCCATTCTTGGACTGAGGTACATTTTCTTCTTATTGGATTTCGTTTATTAGCTGTTTAACATATTTCTGTAGGGTTTTTTTTTTTTTTTTTGTACAGATTAGAAACCATACAGTGTAAACCATTATATAGGTCAATTAATATATTTATAGATCATCCTGTCAATTTTTTTTTATTTTTTTTTGCAAAGCTCCCTTTTTCCTGAAACCAACAACAAAATATAAAAAAAAAATGATAAGCAGGAT…	ARS409.6	4	212000	212800	36.04	0.04	4	TAATATATTTA	0	212502
GAGCTATAGAAACCACGTCCATTCTACTATCGCAACCGCTGCCGCTGCGATCGAATGTGATGTCTGTCTTGGTAGGCATATTTGTTGCCGTGGGGGGCTTCTTGTTTGGGTATGACACTGGACTTATAAACAGTATCACGGATATGCCGTATGTTAAAACCTACATTGCTCCGAACCATTCATATTTCACCACTAGCCAAATAGCCATACTCGTATCATTCCTCTCCCTAGGAACATTTTTCGGTGCGTTAATCGCTCCCTATATTTCAGATTCATATGGTAGGAAGCCAACAATTATGTTTAGTACCGCTGTTATCTTTTCCATCGGAAACTCATTACAGGTGGCATCCGGTGGCTTGGTGCTATTAATCGTCGGAAGAGTGATCTCAGGTATCGGGA…	ARS409.7	4	213600	214000	36.04	0.04	1	AATTATGTTTA	0	213874
TTCCTATGGAGCTTGTTATATGTATCATTGAATTAGGTCTGGGCTGATGTTTACGCTAAGGCTTTGGAAGGTAAGGACTTGAAGGAAATCCTATCTGGTTTCCATAACGCTGGCCCTGTTGCTGGTGCTGGTGCTGCTTCTGGCGCTGCCGCTGCTGGTGGTGACGCTGCTGCTGAAGAAGAAAAAGAAGAAGAAGCTGCTGAAGAATCTGACGACGACATGGGTTTCGGTTTATTCGACTAAACATACAAGGAAAGTCATTTTTTCTGCAACGTTTTTTTACCCTTTATGTATATATATTTACATATAAAATAAACCTCTAATCAATCAGTATTTAAAAATCGGAAGTAATGTCCATACGAAAGGGCTACGAGAATTTAACCATCTCGTTCTTTGCTA…	ARS409.3.0	4	230400	230800	45.63	0.04	6	ATATATATTTA	0	230575
AAGACCACTTCATCGATGGAAAAATATTGGAGTTATCCAGAGGCACCTCTATTGTTATTCTCATCGTTTACGTTTTGTTCTTATATTTCCAGCTAGGGAGCCATCACGCCTTGTTTGAGCAACAAGAAGAAGAGACCGATGAAGTTATGAGCACCATTTCCAGGAATCCACATCACTCTTTGAGTGTCAAGTCATCATTGGTGATACTTCTAGGTACAACTGTGATCATCTCTTTTTGTGCGGATTTTCTAGTCGGTACGATAGACAACGTTGTTGAATCTACCGGGCTATCTAAAACATTTATAGGTTTGATTGTCATTCCTATTGTGGGTAATGCCGCAGAGCATGTCACTTCAGTCTTGGTGGCCATGAAGGATAAGATGGATCTGGCGCTAGGTG…	ARS409.3.1	4	233200	233600	45.63	0.04	3	TAAAACATTTA	0	233504
TCACTTCCTTTTCAGCTTCGTGTTGTCTGTGAGCTTCGATAGAATCCTTGATAGCGTATTTAGCAGCCCTCTGCACAATATAGAGTAAATCAGCACCAGAGAAACCTTGAGTGGCCTTGGCAATCGCAGTTAACTCTAGCCCTGGTTCTAGTGGTGTTTTCCTTAATTGAGCATTTAGAATAGATAATCTAGCGTTTTCATCTGGCAATGGAACATAAATTAATTGATCCAATCTGCCAGGTCTTAAAATAGCAGGATCAATTTGATCTGGCCTATTGGTGGCACCAATCACGAACACATTTTTCTTAGCATTCATACCATCCATTTCTGTTAATAGTTGGTTGACGACTCTATCCGAAGCACCACCAGCATCACCCAAGGAACCACCTCTTGCCTTGG…	ARS409.5.0	4	236800	237200	48.46	0.02	1	GAACACATTTT	0	236779
GAGGTTTGCCAGTCAAAGTAAAAGAGCTGCCATTAAGAAATGTATTTCATTTTGACAGCTTCTTCGATCAATACCGCCAGCTCCCTCGAGCCTATAACTATTTTGCGGATCTGTAAGCCGTAATGTTTTTCCCATAAACGTCACTGAATGTCCATATATCATACTACCAGTAAGCGCCTGTTGGAAACCTTCCTACCTTCATACGTGTATTCTGCTATATCCCTTCTTTTCCTCTTTACGTACAGAATGACATCTATGTAGGCAAGTTTCTTTTTCCATCATTGGAAAACGAAAATACATTTTTCACTAGCACCACAAAATTTTCAAGATGGCCAGGCTAGTTAAATCTATTATACAATAATTATTGGTTATATATTTAAAAAACAGAAACATTTTTTG…	ARS409.5.2	4	242000	242400	48.46	0.02	8	AAATACATTTT	0	242216
AAAAATCACTTCCATTATTATACAAATCCTTCGTAAGCTTCATTTTTCTTACCATTGTACTTCTTCAACTTTTTCTCTTCTTCTCTCCGTTCATCTAGTTCATCTTCGTTAATTAGGTCATCAATATCGAAATCGAAATCATTTGGATCTTTGTTGTACTGTCCAATTACACGTCTTTTAAGGCCTGTCTTTGAGTCTATTTCAAATTTTCTGGAAGCGGAAGAGGCACTTGCACTGTCATGGCCAAGGCTTTCCTCCGTGTCCTTCAGATCAAACTTTAATACATTGGTATGATCAAGTTTTTTTTTCAAATATTCCCTCTTACCAAGCTTACCAGTCGCTGACTGTGCTGTTGCAGACGATTTCGGTTTTGTTAGTTTGAATGTACCGATGCCAGAA…	ARS409.5.3	4	245200	245600	48.46	0.02	2	GATCAAGTTTT	0	245406
CTATTTCATAGTTAGAGTCTCTCTTCCTTGTTATTGATATGATTTTTCTTTTGTACCGTGTGTGTATGTATGTATGTATGAACGTACTACTAAGCTTCAACGTCACTCTATAAAGAAACTAAAAAGACACGTATTTATACCTTTTTTGAAGAATGCGAGATTGCAATGAAATATGTGTCTATTTTTTACATGAATCTTTTGACCAACTCCTCATATATACCCCACGCAATACCTGCACTGAAGGCCTTTCTTGCCAGCCTCATGCTTAACCCGCTAAATAACTTCAGCACATTTTCATTTTTAACTATAGATGTAAATGTATTGAAGGAGTTGGTAAATTTTGATGGTTCCAATTGCATTCTCGTTTTTATGGTGTCGAACGGTGCCGTTACTGTGGTG…	ARS410.0	4	246800	247200	41.2	0.02	1	TTTCATTTTTA	0	246794
CCTGGAAAGGAAGCATTAAAATCAAAGAGCCCGGCGTCTGGAGCGCTTTAGTGATCGCTGACTCTGGTATTGGGTGGTCCGTTTTTGCTGAATGGTTGTGCGTATAAACGTTTTTCACAAATTTTTTTACAGCGCTATAATCTGTATCATTCAACATACATTCTACTCAGGAAGGTGAATTTCATAACTCATATATGGCTATATAGTACTTATTATTTAATGATTTATCCATTGCATTCATAAAAGCTATGCTGGTCCAACTTTTTCGTATTTAGTGATGTTTTCGGTGAAGAAAATATGAAAAATTAGACCAAATGCTCAAATACATACGACATTTGAATTGTTTAGGCAAGTCCGAAAACGAGGTATATCAGCTAATTCAACCTGAAAACCAATTGA…	ARS410.2	4	251200	251600	41.2	0.02	3	AAAATATGAAA	1	251422
CAAATTTTACAAACTGAAATTGAAAATTATCTTTTGGAAAACAATCAAGTAGGTACTGATGAACTGATTTTACCATTACCTTCACACGCGCTAACTGTACAAGAGGTGCTTAATAGAGTGGCTTCAAGGCATCCCTCAGAAAGTGAACATCCAATCAGAGTTTTAATGGCATCTGTCATACTAGATTCTTTGCCATCAGTTATTCATTCATCCGTGGAAATGTTGCTTGATGTCGTCAAGGGAACCGAAGCTAGTAACGATATTATAGATAAGCCTTATCTTCTGAGGATAGTTACACATTTAGCCATTTGCCTTGATATAATTAATCCAGGTTCTGTTGAAGAGGTTGATAAGTCCAAGCTCATTACTACGTATATCAGTCTTCTGAAATTGCAAGGC…	ARS410.3	4	252400	252800	41.2	0.02	2	TTACACATTTA	0	252729
GGAAAACCTGCTCTTATTAACCCCTATAACAATCTCTTCACCCAATGCAGCTATATCCTCTCCTTCGCTACCAAATAGAATAGATCTATCATCATCTTCATCCTCCGGATAATCATTTTGGTAATAGTTTTCGTCATTAGAATCCTCATCGTCTGAACGGGCTTCATTGGGATCACTTTCTTCATCAAGAGCCAAATCTATATGCTCAATAATTTTCACAAACCCTATATTTTTCTCGTTGTTATATCTAGCAACCTCATCGTCATGAATTTTCTCCAAATGGTAGATGTCAAAAACGTAATCTAAACTGGGTAGTGATGCAATTTTTGCAGAATCCCCAGTAAAATATTTCCTACTTGGTTTTTTTCTTTCTGTCTTTTCTACACCTTTATTCAACTT…	ARS410.5	4	254400	255200	41.2	0.02	2	AAAACGTAATC	1	254591
CAATGCATCCCCTTGTGCCAGCGGCGTGCTATGATTTCCTCCATCTCTTTTCTCGTCTTCCTCGTTTCGCCTTCCTTGGCTGCTGTTCCTTCATAAAGTGTTGGTGATGGAGGCGGTAAATTCTTTTCTGTGTAGATCTTATCATGTATGATTGTTGCGACCCTTGCATCGGGATCTGAGAAGAACTTTGCGTCGGGGCATGGTGATAGAAGCACAGACTTCATAGATTTGATGACGGAAGCATTCATCAAGCGTTTAGATTTCTTGTCGCAGTTATTTTCCTTGCTCTTCCAAAACGTGTTCCATGACGATGCATTGATTCCATCATCATCATTAGCAACATCGCTATGATTTGGAAGTTCCCCAATAGGACTTACTTCAGGCTGGAAGAGAGGATCA…	ARS410.7	4	265600	266800	41.2	0.02	3	AAAACGTGTTC	1	265873
GCTGGGGCAGCAGCACCAGCGCTGAAGTTGACCAATAAGTCCTTCAAGTTTTGGCCGTCCAAAGCCTTAGCAAAAATATCAGCCCAGATATTTTCAACTGGGACATTGGCAGCGTTAGTCAAAGTCAACAACTTTTCAGAAGAGATTTCGATTTCAGAGTCAGCCAAAATCAAGGCGGCGTAAGACAAAGCGGATTCAGTAGACATTTCTTCTTGTTATTTTAGAGATAATCGGTTTAAGCTGTTGTATTGGACAAAGCGGACTATTTCTTTATTCTTTTGATTTCTTTTACTAAAAATTATTCAGAACAGAAGAGATCGCAAACTTTATAAAGATATTTTTTTCAAATACCATGTAAAGGCATTCTTTAAAAAATGAAAAAAAAAAAATCATTACAAA…	ARS412.0	4	310000	310400	35.28	0.14	3	TAAAAATTATT	1	310207
GAATCAACTCTATTTTCCCCACCCCCCCGCTTTTTTTTTTTCATGTTCCTTTACCAATCTTTGAAAAATCACGAGATGGTGCATATTTGACAAGGAACGCTTAAAACATCGTGGAGTGAGTGTGGTAAAGGTAAACTGGTCATAGCGGAATTGGTCATAGCGGCGTAGTGCAGCGCAGCCACTAGGAGGATATGGTTTCCTTTCCTTCAATTTACTTGAGTATAAAATATCATAGTAAGCGAAACATTATACAACGATATGAGTCAAGATACAAAGGAGTATAGAGTTAAGAAAAATATAAAAATTGAAGTAGCTCATAGCTTGGAAGAGTCTAGGATGAAACTCTTGCCTTTTTCAATATTCTTGCGTAGCTCTTTGACCGCAGTATTAACGAGTTGT…	ARS412.1	4	314800	316000	35.28	0.14	1	AAAATATAAAA	1	315333
TGGACAATCTGCCTTCGTGGACAGTTTTGAAACGCTAGGCGACAGTTTTGCAACGGAAGGAAGTGGGAGAGCCCAGAAAGGCTTTCTCTCGATGGTGGATCATTCTTGCGCAGGCGGAGGATGGGAAAGCTCCGTTCAGGTTTGCGGCTTTTCTTTCTGGCATTTTCGTTCTCCCAACTGCGCAGGCAGACATAGCTTGACTTTACTCATGCTCGCATTAGGCGGGTTGAATCTCATAGCTTGAAAGATAGTATTGAATTATATTGAAGATTTTATAACTAGTGATAATTTCATTCAAGTTTTAAAGAAAGAATTAATAAGCAAACAGAACTCAATCAAAGGAAAAATGGCCGGTTTGAAAGACGTTGTCACTCGTGAATACACCATTAACTTGCACAA…	ARS412.2	4	322000	322400	35.28	0.14	2	ATTCAAGTTTT	0	322170
TCCAATTTTTAGAACACAGGGAACAATAAACAAGTGTACGGAAATTTGCTAGTTCTTCTACGAGTGCTTCATCGCTCGAGCCCTTATTTTTGTTGTTACCACGGAACAATGTATCATGTAGTTTTTCACACTTGGATTCTAGATGAGATGCCTTCTGCTTGAAGTGCTTCAATTCTATTTCTGTATCATTTAATTTAGTTTCTAGATGCGTCATATCTGCAATGCTTTTGTTACTTTCTTCTTGTAGCTTTTCTAATGACCTTTTCAGTTTAGTGGATGTATTATTTAAATCAATTATTTTTAGTGTCTCTGTTTTACTGGAATCAATTAACCTGCGTTCATTATTTTGAGAAAGATCCAGTTGTTTATGTAAATTTCCTATTTTTTGCTGTAGCAATC…	ARS413.0	4	324000	324400	37.25	0.21	1	AATTATTTTTA	0	324474
AAGTAACTCAAAAAAGGTTAATGATTACGATGTTACAATCGCTCTTGACTTATCTGTACTTGTGGAAACCAATGTCGTTAGCCTTTTCTCTGAAACATTGACGACAGATGTTTAAGTCGTACTTTCTGACCAAACCAGTGTGGGAGGAGCAGACACGACATTGACGGGAACCTTTACCGAATCTTCTTGGGTGGGAGAACCAAACGTTTTCGTGAGCCATTTTGTATATATTCTATAACCAATAAGTTTTCAAAATTGAATAGAAAAATGTTAGTATTATAATTTTTGCAGTTTTTATGTTTTCCAGGAGTTCCATGGACGTGTACAATAGAATTTTTCGACTATCGAAGTTAAAAGGAAATAAATATAAGCTTATGCTATGGCTCATTGTATTTGACA…	ARS413.5.0	4	340800	341200	36.91	0.01	2	TTTTATGTTTT	0	340869
GTCATTGACGCAAATGAGGAAGAAGAGGCAGAACAGACCAATGGAAAGGATGAGACAATGATGGAAATTGATGATGAAATGATGGTGGAGCAAGACAATGAAGAGGTAGCAGGCGACGAAGAATATGACATAGAGGATAATGAAGGATTTGAAGAGCTTTCACCCGAAGAAGAAGAACGTCAACTGAGGGAATTTAGAGATATGGAAAAGGAGGACAGAGAGTTCCCCGATGAGATCGAACTAGAGCCCAGTGAATCTGCCATCGAACGTTTGAAAAGGTATAGAGGTTTGAAAAACTTATACAACTGTGATTGGCAAGTTGATGAAAAGGACCCATCATCACCAGCGGAATGGAAACGTCTATTAAGGATTGGCAATTACAAAAACACTAAAAACAGA…	ARS413.5.1	4	342800	343200	36.91	0.01	1	AAAACTTATAC	1	343130
GGAACTTGGTATGATGGTAGTAATGCTTTATTAGTCATTCCCCTACCCCCTTGCGCAACCTATCATTTTACTTGCCAGATGTGCTCTCCACTGTTAGAGCCTCTTCGCTGACAAAGAATGGACGAGTACGCGAGCGGTGAAACGAGCACTGCAGGCAAGAGAAAGAAAAATCATGCATGATTTGGAAAGCGAATAAGAAATGACGCAGTTGAGTGTTTGAGTTGGAGCCAGCTGTGTTATTCACAGGTTCATTTCGAGAAAATAAACGCCTTTGGTGGAAGCGGACACTATATTTCACATTTTAGCTGTAGAAGTAAAAAATTTATTTCAAGTTTACTTAATCCATTCAAGCAGTGCTTTCCCGGAGTTTCGAATAAAAGACACTGAGGACTTTTCAGT…	ARS414.0	4	407600	408000	34.9	0.19	6	TTTCACATTTT	0	407884
TGATGTAACCATTCACACAGGTTATTTAGCTTTTGATCCTTGAACCATTAATTAACCCAGAAATAGAAATTACCCAAGTGGGGCTCTCCAACACAATGAGAGGAAAGGTGACTTTTTAAGGGGGCCAGACCCTGTTAAAAACCTTTGATGGCTATGTAATAATAGTAAATTAAGTGCAAACATGTAAGAAAGATTCTCGGTAACGACCATACAAATATTGGGCGTGTGGCGTAGTCGGTAGCGCGCTCCCTTAGCATGGGAGAGGTCTCCGGTTCGATTCCGGACTCGTCCAAATTATTTTTTACTTTCCGCGGTGCCGAGATGCAGACGTGGCCAACTGTGTCTGCCGTCGCAAAATGATTTGAATTTTGCGTCGCGCACGTTTCTCACGTACATAAT…	ARS414.1	4	410400	410800	34.9	0.19	1	AATTATTTTTT	0	410447
CGAATGGTTGGAAACATGTGGCTCTGTCGAAGACTTCCCATTATTTGAAGCCGTATACCAAATCGTTTACAACAACTACCCAATGAAGAACCTGCCGGACATGATTGAAGAATTAGATCTACATGAAGATTAGATTTATTGGAGAAAGATAACATATCATACTTTCCCCCACTTTTTTCGAGGCTCTTCTATATCATATTCATAAATTAGCATTATGTCATTTCTCATAACTACTTTATCACGTTAGAAATTACTTATTATTATTAAATTAATACAAAATTTAGTAACCAAATAAATATAAATAAATATGTATATTTAAATTTTAAAAAAAAAATCCTATAGAGCAAAAGGATTTTCCATTATAATATTAGCTGTACACCTCTTCCGCATTTTTTGAGG…	ARS414.3	4	412800	413200	34.9	0.19	5	TAAATATAAAT	1	413155
AGAGGTGGCGCTGCTGGTGGTGCCCGTGGTGGTGCCAAGGTCGTTATTGAACCACATAGACATGCCGGTGTTTACATTGCTAGAGGTAAAGAAGATTTGCTAGTTACCAAGAACATGGCCCCAGGTGAATCAGTTTATGGTGAAAAGAGAATCTCCGTTGAAGAACCATCTAAGGAAGATGGTGTCCCACCAACCAAGGTCGAATACCGTGTATGGAACCCATTCAGATCTAAGTTGGCTGCCGGTATTATGGGTGGTCTAGATGAATTATTTATTGCCCCAGGCAAGAAAGTTTTATATTTAGGTGCTGCTTCCGGTACTTCTGTTTCTCACGTTTCAGATGTTGTTGGTCCAGAAGGTGTTGTCTACGCCGTAGAATTTTCTCACAGACCAGGCAGA…	ARS415.0	4	427600	428000	35.84	0.86	1	TTTTATATTTA	0	427867
TCTTGACGGTAGAGATAAAAGAGGAAACTTCTAAAGCATTTAGTACTAATATGGACAATATGGCTGGAGGATCTTCCAGGGAATATGCTGCTATGCCGACTTCTACCACGAATAAGGGGAGCTCTGAAGTAGACGAAGAAATTAATGAAATAAAACAGAAGGTGGGACTCCAACAGCCCATAGCATCGGTTGATGATAGTTTGTCGGCCATTAAAAACGATAAAGGGTCGCGAATAACCAAAGCTTTTAATGTTCAAAAAGAATACTCCCTCATACTAGACTTGTCTCCGATTATAATATTTAGTAAAAGCACCTGTTCATATAGCAAGGGCATGAAGGAACTGCTTGAAAATGAGTATCAGTTTATCCCAAACTACTATATTATAGAACTTGACAAAC…	ARS415.1	4	432400	432800	35.84	0.86	2	TATAATATTTA	0	432708
ACTAATCGAAAAATTCTACAATGTAAGATATCCGGATCTCACAGATGAAGAACTAAAAGACGCAATTATAGTTTCGAAGCCTGCCTTGGGTACTTGTTTGTACGAACAATAACACTAAACACCTTCTTGGAACAACCTTTAAATATTAAAAGTTTACTCATACCTCTTACACTCTATAAAGAAACAAGTTGGTGAGTCCAATAGAACCCATTCCAGCATCCGATGCAACCATAGCCCGGTTGATGCGAGTCAGAGTGGCTCCGCACACAGAGGTTATGTGACCATGGTAACCGTACACATTTTTCCACGGCAAGGAAGTGGCGCGAAAGAAGCACCGCCCTCCACGGATCACCCCATTTGGAAAAGAACGGAGACATAAAAAAAAATTACCTTCACGCC…	ARS416.1	4	465200	465600	26.43	0.61	1	GTACACATTTT	0	465172
ATGAAGAAAAGCCCTCCAAGGAAGAAGAAGAGCCTAAAGGACTTGATATATGAAACGAACAAGACATTCTATCAGGTGGATTCTAACAAGGTTAAATATAAGGTAGGTCTATCCAAGAAACAGCTATTACCATCCAAAACGGTAGACAACTAAGTTCAAAGAGGAGAACGTTTGAAAAAGAGTTCGGTGGCCCTCCACTTTTTTCAACGTGCAAAAGTTGTCCACAACTTACTTATCATTAGGCTAAAATTACAATTTATATCTTACGTATCCTTTATCTAATTTGCGACTGTAAACATAAATTTAGGATAATATTAGGAGAGACAGAGGGAACCGCAACTTTACTTCGTTTTCGATTGAGATAAAGTAGGTTGCTCGTCGATGGGCGCTTCGTCTGAT…	ARS417.0	4	478000	478400	34.64	0.08	1	TAAACATAAAT	1	478420
TTGCGATATCCTCACCAGAGCCTTGACCTGTCTCAGTAATATTATTTCTATGCGCCACGTGTTTATTGGGCTTAATTGCCGGCTCCTCGTGGTTAGATAAAATGAAACTTGACAATGAAGAGGACAAAGTATCTGGGTTATTCTTTTTTTCAGAAACTTGTAGTCCTTCTGGTACCGATTTGGGAGTTGCTTCTGACCTTGTTATTTTGTCCGCGCATGTCACGGACCCGCCATTATTGCTATCTACACCATTGTTGTTATCGGCTAAACATTCATCATCTCTAAAAATTCTTAAATATGTACTCGCCTTTCTGCCATGTAAGACGGAGGAAAGTTTCTTCGTCTCAGGTACATTAAGATCTTTCAATGTTGTTATGCACCCTTCCGACTCTTTTTGGC…	ARS417.1	4	481600	482800	34.64	0.08	4	TAAATATGTAC	1	482089
CGAAATCCCATAAACGTGGGCGTATTTTGTTGTTCGTATTGTTGCCTTCTATTTGGCTTTTGGTATCTTCGATTGCTTTAACTATACCGTCCACGAGGACTGCGCGCCCTAGATTTTCATTTGTAGAAGGAATGATCAAATCTGCAAAAGTTCTAGTGGGCTCTATATATTGTTGCATCTCCGGGCGCAGATGGTCCATATACTCAGTGATCAACTGGGCTAGTTGTTCATTGCTCCCTACGTTCTTCTTCTTGATTAGACTAATTAATCTTTTATCTGCATCACTATCCAAGAATACTTTTAATTGAGATATTTCGTTGATGCGTTTATCGTATAGCGCATAACAGCCACATACTATTATCAAATCTATCGGGTCCTCGTAATCATGTTGAATCATGT…	ARS417.3	4	485600	486000	34.64	0.08	1	GAATACTTTTA	0	486083
GCCAAGCGCCTTAACAACTTCTGGAGACAACGTTTCCTCGACTTGATAAATGTCTGCAGAGCCTCCAGCGGCTTCAATTCCCTTCTTTTCTGCCTCTGCGGTGGCAGCAACGTGACCATATAGTGTGTAAATGATGATAGCTACTCTTGGCATTGTATATAATTGGATTCTTTTAACTAGAGAGTGGTGATGATTTATTGAATATATTATTCGACGATATTTAATTATATGAGAAAAACAGTAAAAAGAATAAGGCCAAATGCATTGATCGTTTTGCCGCTCGTTGACGTTTATATATATTTTATTGTTGTCCAGAGAGTAACTGTACTCAATTGTGGGAAAGGGGTTGCTAACGAAGCCAAGGCTTGCCAATACACTGCGCAGGTGCAGCCCCGCAGA…	ARS417.5.0	4	504400	504800	39.15	0.28	1	ATATATATTTT	0	504830
CGGTGCGGCCTTTTCACTGCTAAACAGTAAAAAGCATTTCTTGGCTTTCCCTGAGGGTGTTGACCGCAACCAAGCCAATACTTCATTTTGCTTTTTCCTCTTTTAGAAAACAGAGTTTTCCCTGTCTCAAACGTTTCAAAGACAAATATGCGGAAAATCAACTTATAAGTAGAAAAATACTAGCGATTTTTCTAGTTAGAATATTTAGGGGAACTATGCGAAGACAAACGGTGAAGTCAAAAGAAACACACTGCCTCGATTAGAAAGGCTTATCTGCCACAGTTTAATTTTTTTTTAATTTTATTTCTTTTTTTTTTATTTAACTAGAATCTGGCTAAAAATAAGCAACGGTCCGTGTAGATTACTGTTTCGAACGAGGAACAACTGAAGGAAAAGTTT…	ARS418.0	4	544000	544400	27.82	0.19	3	TTTTAATTTTA	0	544144
AGCTCTCTTCGAGAAAAGGAAGAACAAAAAAAAAAAAAATAAAGCAAAGAACAGGTTATAACGCTATGGGTAACTTTCCAGCTCCAAAAAACGATTTGATATTGAGAGCCGCAAAGGGTGAAAAAGTCGAGAGACCGCCATGCTGGATAATGCGCCAGGCAGGTCGTTACCTGCCGGAATATCACGAGGTGAAAAACAATCGTGATTTCTTTCAAACTTGCAGGGATGCGGAAATTGCTTCTGAGATTACTATCCAGCCGGTAAGACGCTATAGAGGCCTCATTGATGCTGCTATTATTTTTAGTGATATCTTAGTTATTCCGCAAGCCATGGGTATGAGGGTCGAGATGCTCGAAGGTAAAGGTCCACATTTCCCAGAACCTTTAAGAAATCCGGAAG…	ARS418.3	4	551200	552400	27.82	0.19	1	TATTATTTTTA	0	552083
GCTGACTTGGACAGCGCCTTCAATAGACCTGGCCCTTTCTATTCTGGCCCTTTTCTTTTCATGCAAATGCTGCTGCTGTTGGAGCTCGAGGCGCTCAAGAGATCTTTTCTTCGGAAAGGATTCAGTGGTATTGTTATTGTTGCAATTATTGTCGTTAGAAAACACATTCAAGTGGCCCGCTGCTGTTGTTGATGCGGCAATTCCATTATTATGTTTCAAGTTGGTATCTGTTTCCTTTAACGGAGACCTTATTATCATTTTCGTTGGAGAAACCATTTTCTTCTTTCTTTTCTAAATATGAACCAAAAGCAGAATTCCAAATGCCTTTCAGATTCAAACCTTGAATTCTGAAGATAACTAGCCCTGCAAGCGAATTCAGATCTAAAGGAATCTACACCT…	ARS418.6	4	560400	560800	27.82	0.19	1	TAAATATGAAC	1	560638
AAGACTGGTGCTTTGGCTAATGTTAAAGAAATCAACGGGTCTCTAACTATATTTAACGCTACAAATCTAACCTCATTCGCTGCTGATTCCTTGGAGTCCATCACAGATTCTTTGAACCTACAGAGTTTGACAATCTTGACTTCTGCTTCATTTGGGTCTTTACAGAGCGTTGATAGTATAAAACTGATTACTCTACCCGCCATCTCCAGTTTTACTTCAAATATCAAATCTGCTAACAACATTTATATTTCCGACACTTCGTTACAATCTGTCGATGGATTCTCAGCCTTGAAAAAAGTTAACGTGTTCAACGTCAATAACAATAAGAAATTAACCTCGATCAAATCTCCAGTTGAAACAGTCAGCGATTCTTTACAATTTTCGTTCAACGGTAACCAG…	ARS419.1	4	564000	565200	35.61	0.07	11	AAAAAGTTAAC	1	564007
AAACGAAATCGTAAGTCCACATGAAATGGAAGTAATATTTGAAAACATGAGAAATCAACCGAATAATGATTTTGAACTGGCGTTGATGAACAAGTTGAAATCCTCATTAAATGATGATAACAAAGTTGAGCAGATAAACAACGCAAGGATGGATGATGATGAAAGCACTAGTCATACAACCAGAGACATCGGGGAAGCTGGATCACAAACGACAGGGAATACTGAATCGGAGGTAACAAACGTAGCAGCTGGTGTTTTCATCGAACATGATGAGCTTTAAACAAGGAGGAGTATAAACTTTTAATTTTTTTTTTTCACGTTTTGCCTTTTATATACCGATTAAATATTTATATTTCTGACTTTTTCTTTACCGACACCAACAGGTGTAGGCTCAAAACA…	ARS419.3	4	567200	567600	35.61	0.07	8	ATAAACTTTTA	0	567564
CAGTACATCCCTTAGATTGAAGAAATTTTTTAACGCCAATCCAATATTCAATCTCCAACAAATTTGTGTACTTGTTATCACTCTTATCTTCGTCATCCTGCATGAAATTTTCTGCCATATTATGTACTATTGAATTGGAAATTAGGTTTGTCAGATGGAATACAGAAGGGATTAGAATTAATTTGTCAAATCCTGATAAACCATGGCAAAATACAATAGGATTTTTTGGGGGCTTGTACGAATCAGGAACTTTGACGGAGTCTATTATTATATCATTAGCTTTATTATCATTTTTCATTTTTTTTATGCTTTTCCTCCTTTAAAACAAGACGCTTTATTCTCTATATTCTTCCTTGTACATATTTTCAATAGCGGTTCATATTAGGCTCATTATGAGAA…	ARS419.4	4	568400	569200	35.61	0.07	2	TTTCATTTTTT	0	568694
GGACTTTCTGTGTAAGTAAACCAAGACATAATTTAATATATTTGAGAAATCTATCCTTATCCAATTGGTTGTTGCAGATGATTTCATATAAGCAAAAATGTTGGTATAACTTTCACCACATGCAATAGCAGATCTTTTGTATAACGCGTATTGCCCAACATAATCTAAGATCAGATCATTAATAAGAAAATCTCATTTCCAAAACCGATTGGACATATACTGTTTAGTAATAACCGCCGATATGATGTTCTTCCGTTCTCTTGCCTCTGTATTCCGTTACCCGTTGCAGAATGAAAAATTTTTTCTTTTGGCGATGAGGTAAAAAATTATCAGAGATGCCAAAGTAATGGAGTTGCGAATAAGAAAGCATTATGTCGTACACATCGGAAGCGAAATTCT…	ARS419.5	4	570000	570400	35.61	0.07	4	GAAAAATTTTT	0	570469
TCGTGCTCCGTGACTAGGATATTGGAAATTCAAATGATATAACTTAACCATATAAATCTTTTAAGTGGTTCCGTTGTTCCTCAGATTGCTTTGTACCATCTACTTTCCTAGCTTCCAGATCTCCAATGCTGACAATCTTGGGCTGCTTGGTTTCTTCTTGTTCCCGTTTTTTCTTCAGATATTCATATTTAGTAGGATTGGCGACTAAAACATGTTGTACTTTTTCCTTATCCTCAATTTCATCACGTATACCCATTTCCTTAGCGTGAGATCTAGCAAACTGGTTCAATTCGTTTAATTTTAGGCCTTCACCTGTCAAATGTCTGCGGAACATTTTTGATTTTTCATCAACTGCGCCCAGTGTTTCAGTTTTGTACAATCTTGATTTAGGATCATAAT…	ARS420.1	4	618800	619200	38.05	0.02	1	GTTTAATTTTA	0	618741
AACATACCTTATCCCTATCTAAACAGAAGAACATATTACCCTCTGCTGTACAATCCAATGAGAAGTACGTTTCTATTAGTATACTAGATACTGTCGGGAACGAAGGCAGTCCTTTACTACTTACTGATGATAATATAAATCAGCACCCAAACATGATAGTCAGCTCTACTGCTGAGGATACTTGTATAGTAATGTGCCACGTGGGCGGCTTAAGAAATCATGTTGTCACAAATGATCTGCTTCTAAGGGATGTAAAGAATATTCTTTCGGCCATGAGGAGTGGCAACGACACAAAAAATATTAGCGCTCTCATAAACTCACTGGATCCATCGCCAATCAGTAAGATCGCTTTGGAGTGGATTCAGTCCCATCGATTAAAAACCATTGAACCAAAGCTAG…	ARS420.3	4	622800	624000	38.05	0.02	3	AAAAAATATTA	1	623393
GACGACTCGTTTACAAGGTAAATTCGATTACGAAGAAGGTGCGGACAAAATAACGATTAATTAAAATACAATAGGTATATAAAATAAATAGAGAATAAATATAGTGTAGTTGCTTTACAGAAAAATGAAATAAACTGGAGTACGGATCACCGAAGAGGAGGTTGTTCACTTTCAGGTTATGATGTAATGAAGGTGGGAAGTTAGAAATGTATTAGTTGGCGTATATCTAGAAATAAACAACCCGATGCTTGGGAAGGAACTCAATGTAATATAATACTCATTTTGTTTTGCAAAAACATTATAACTCTTAATTATTTCTCCACATTTCTAAACCCAAAAATAAAACAATCGTCCTCTTGGTTCTCCGAATCCCAAGATGCTTAAATACCGGTGTTATCC…	ARS420.4	4	626400	626800	38.05	0.02	1	AAAACATTATA	1	626615
TTCTCTGACAGAGGCTGGTAATGTAACAACACCGTAAACAGATGGAACACCATATATGATACAAACGAAATCGGAAAGATAATCCAAAACTGACAAATCGTGCTCAACACAAATAACGTATTTAGTTGGAGCTAGTAAAGATCTAATAATTTGAGCGGCATTCAAACGTTGCTTAACATCCAAATAAGATGAAGGTTCATCGAACATATAAACATCAGCCTCTTGAACACATGACATACCAATGGCAAATCTTTGCAGTTCACCACCAGATAACTTTTCAATATCTCTTTTCAAAACGTTTTCCAACTGTAAAATTTTGATGTAGCGTTTCACATCTTCAGGACTTTTTTCCATTCTCAATTTCAAAAGTTCGCCAACTTTTTGAACCGGACCTTTAAT…	ARS420.5	4	627600	629200	38.05	0.02	7	AAAACGTTTTC	1	627886
CGCTGAAGATTGGATAAAGAATGAGCAAGGTGCCAAAGCTAAGGCTCGCGAATGGACGAAATTGTATGCAAAGAAGAAACCCGAGTGATCATTTCTGTATAAGTTTTCTCAACTGAATATATAAATATATATCATTACTATGCTGCTGCTGCTGCAAAAAAAAAAAAATTTACGATAAATGCAAAAACCATAGATGGTCATCTAAAGAGGCGCATTTCTCAAAAATGTAGCGTCGCTAAAATGGTTTTCTCTACCTTTAGTTTTACGCCAGATTTTTACTAGACGCGTTTTAGTTTACTTTTTCCTACCCTGTTCGTTTTTTTTTTTTTTTTCGCACCAAATTTTTCAACCGTTCCATGGAAGCCGGGATCGACCGTCCTACACTAATGTAAGCATTAG…	ARS420.6	4	630800	631200	38.05	0.02	1	GTTTACTTTTT	0	630805
AAAATTTTTGAGTATTTTTCAGAAAACCTCACTGCTGCTGGTAGAGAAAAGAAGTTACAGAAAAAAAGGGAAGAATTACGAAGGAAGAGGAACTCGAGAAGCTTTGGGCCACGTGGGTCTCTGGATTCAATTGGTAGTTACAGAATGTCTGCCGACTTTGGTCGTCCCTCTTTGGATTATGAGAACCTGAATCAAACAATGTCACAGGCTAACAGGTATAACGATGGTGAAAATTTAGTTGATCGAACGCTACAGCCAAACCCTGAATGTAGGTTTGCCAAGGATTACTGGAAAAATGTTAAAGTTGGTGATATTGTTCGTGTTCACAATAACGATGAAATTCCTGCTGATATGATCTTATTATCGACATCAGATGTTGATGGCGCTTGTTATGTGGAA…	ARS420.7	4	632400	632800	38.05	0.02	3	AAAATGTTAAA	1	632607
TAGGAAGGGGCTGGGTTCTCCCCTTCCTGCCGGGGTCCGCCCGGCGCCAAGAGTAAGAGAGCGAAGCCGGAGACGTAATATGAAAAAAATTTTGAGGGGAAAGGGCGTCCGCAAGGGCAAGGGCAAGGGGAAGGGGTGGCGTTTTGTGCTTCAAGGAATTATATTTCGTTGTTTTCCGCACTATGGCGGCATTGTGGCAAGTAACTACTTTACGGAGAAAGACTAGAAAATGGTTACAACTGCCACTATTACCGCTTCGCATTCTCTTGTCTTACAGGTCCCTTGAATTGGCATTTACGTTTACATCCGATCCGGTTTTTCACCAAAGAGAAAGGAAAGGAAAGGTAAAAATAGCAAACCGAAAAAGAAAACAGTATTTTCTCTCTGTTTAGGATTATT…	ARS421.0	4	636400	636800	38.9	0.2	4	ATTTACGTTTA	0	636553
AACGATCCACCCAGTCTTTCAAAATCATTCTTCGTAAGCTCTGAAAGCCCAATTGAATTTAAGAATTCTTTGGACCAGCCTATATCGGAACCTTCGACACCCACTGGTAGAAATCCCTGCTTACAAACAGCAGAACAAAATGACCTATTCTCTTTTCCCGTGGCTTTGAAAGTCAAGTAATCCGGAAGGTCAAAAAACTTACAATCCTGAAAAATTCCAGCTTCTAAGTTGTTCTTCAACCACTTAATCTTCGGAATTTCCATTTCAACAGACATTTGCCCTCCCACATATTTTAAACATTTATCACCAGATGAGTTGATTTCTTCAGTCTCCTTCATCGCCCTATGGTCCATCCATAATATGATATTCTGGTCATTATTGGTAAAATCCGGTCCAACT…	ARS422.0	4	674800	675200	37.35	0.02	2	TTAAACATTTA	0	675164
GAAAAAGAGCCCATCAAATTCGAAATTCATATCGTCAAGGTTCGTATTGTTGGTTTAGCCGGTGTGCATTTTAAGAAAATTTCTGGGAACACTTGGTTGTATAAAGAGCTGGCTTCTAGTATATTAAAAGAACTAAAGTTGTAAGTAACACGTTCCCTGAGAAACCACAGCTTACATTTTTGATATTCGAAAACAAGAATATCCGTTCGATAGAAATTTATATATATATATAGATTCTTTTTATTCTCTTTTGGAAAGAAGAAATAGAATGGACCTAAGCAGACACTCAGCAGTTAATATTTTCGTCCCTTAATTGGTATTATTTATAAATAAATGGCACGTACTTTATGTGTAAAGCAGTTCATCATCGATTGATGGAGAGAATTTGTATACGTAGAG…	ARS422.3	4	696800	698000	37.35	0.02	1	GTTAATATTTT	0	698038
GCGGTGCCTGCGAAGTCTTAGTGAAGAGTTTAAGATTAGAAGTATATAGCATCGAAGGGATGGCCCAACTGAAGCAGGTTCCTCTGCTTGTTTCTCAGCTTATATAAAGGATGGATTGCGTATGTATACATGTGCATTTGTGCGTACGTCATTTTTCGATAGAGTCAGCTTAAGTACATGCGTATAGGTATGGAAGAGCTTAGAAGGGCGCTGGCGCTGCTAAATGGTCAAGGATATGAGTTTATGGTGTTCATAAAGGAAAAAGACCATTTAATAAGTGAGTCAATTCCAAAAAACTTGTTCTCAGAGAGTTTTATATCATCTTCAATTGAAAAAAACCCTCCACTCACGTTCGATCCATTGGTAAATAGGAAAAGAATAACTGTTTATGAAGAAAAT…	ARS422.4	4	700000	700400	37.35	0.02	1	AAAACTTGTTC	1	700425
TACCAGCCGACAAACCATTAGATGACGAACTTTTAAGTAAGCTGGAGAGATTCCTTGTGAAAGGTGCCCATGCTGCTTTTGTACCAACCTTATTGGAAGCCGCATACAAACCAAGCGTTACTCCCGTTATGACAATTTCACAAGACAAATATCAATGGCACGTTGTCCCTGGATCACAAATGTTAGTACACCAAGGTGTAGCTCAGTTTGAAAAGTGGACAGGATTCAAGGGCCCTTTCAAGGCCATTTTTGATGCCGTTACGAAAGAGTAGACAATAATATATCTATCCTTTTTTATATTTTACAATGCTTCTATGATATCTTTACTAAGTATGAGTTGCCAAATAGTCAGTGTGACTGCTTACATACGTTGAATTTCTGTATATTTTTACTAAGTTG…	ARS422.7	4	708800	709200	37.35	0.02	1	TTTTATATTTT	0	709266
TGGCAATGGACACCAGGTGGTGTATTAAGTGATAACGTCATTTACGGTGACGGTAGCAGTGGAAACCAAAGCTGGGGAAACTGTTTCAGAACAAACGTGGTCCTCACAAGAAGTGATAGTGACCAAAGTGGTAGATTCTTCTGTGACAGTAGCAGTGGTAATGTTAGAAGCGGCGGAGGCAACAGCGGCAATAGCAGCGATAGAAGCGACGGTAGAGAATTGCATTTTTAATTTGTAGTTATTTTGAAGCGAACGAAAGAAGATGTTTGTTATCCTTGGTTTTTTATTCTATGAAAAAATTTTAAAAAAGAGAGTCTAGCAGAGAGAAGTCGATGAAGAACAACCACGATCCAGCAACGGTTTATATACTTCGAGAGATGACTAAACCATCCTATATGT…	ARS422.9	4	721200	722400	37.35	0.02	8	GAAAAAATTTT	0	721544
TTGAATTATTATTATTTTCAGCATTATTTGGTGATGTATTTGTGCCTCTGTTTTGTTCTTGACCACTTTCACTCATAATGAACAAAAGCTGAGGTTACAAGACTATGAGAGAAAACAAAGGGGAAAAAAGGGAGAAACGAACTATCCTGAAATGCTAAATAATTTCTATCTATAGTAGCTTCACTAGAGGATATATATGATAAACTATATTTCCTTCAATATATAGTTTTTAGCTATTATTTCATTATTGATTTGGTGATACTAATGCAATGTAGTTATATGTAAAAAATTCTTTCATATTTTTTGACAATGGCAGATAGAATGTTTTACCCGGCTTTTTGCGTCGAAGTATATAATTGTTGATTAAGAAGCCAGTAACAATAAAAAAGAACAGTATTA…	ARS422.5.2	4	743600	744000	42.6	0.02	1	TTTCATATTTT	0	744086
TCATTACTTGGTAAGGATGGAAAATCTGTAACACCGGCATCTACTATTGAGCTGCAGACAAGTAATGCATCTACGACAAATGTGAGGACAGATAATTTCATAGAGCTCTTTCTTTTTCGTTTATTTTTGACGTATTTGCTCAAGCGAATAACGACAAAAGCTTGTTCTCTCGTTGATACTTTTAGCCAATTACAATTTCTTAGCAAGAACGAGTGACGCCAACCAAATTTCTCCCAAAAGTGATTATCTGAATAATGAAAGATGGTAGGAAATAAGGTATTGAAACAGGTTCAAAACTTTAAAAGAAAACTGCCAAATAAACTTTCTCGATGCGTAGCTGAAATTTCAACTTCAAAAAAAAAAAAACGCGTGTAACTTTCTACGTGCAAAACGATGTGT…	ARS422.5.3	4	746000	746400	42.6	0.02	1	AAAACTTTAAA	1	746288
AAGTAGAAACCTTGACAGATTTTTCATCAGAAAGTGGTCCCAGCGGAAGGTTTAAGTCATTTATTTCATTCATTATAACTTCGTTGGTTTCACCATAGTTTAGGTTCAATATATTGCCTAAATCATCTGTTGCTAGTGTTTTATATTCGCCTTCTATTGCATAACTCGAAGGGTCACTGCCTCTAGCATTTGAGTAATAAGAGTTGGTTTGTAGGTCAAAATTTAGGCTTTGTACTTTTGAGGCATCAAACCAAGAGTTTGATGTATCCATCTTTTTCGAAAAAACAATGACGTTAATATTTTATTTGATTGCGCTTTAATTATATCGCAGATGTTAAACACGTTCTCAGGATCTATTTACCTAGCTCCAAGAACGAGTTATATGGTGGTATCTATATT…	ARS422.5.6	4	750800	751200	42.6	0.02	1	GTTAATATTTT	0	750759
CGCAATGCCCCGAACTTACTTGGTCGGCACAGCCTCACCAGAAATGTCTAAGAAAAAGCGCCAGTCTGCAAATTGTGACAAGCCAACGAGGAGGGTGATCCACATCATCGATACTAATGAGCACTCAGAAGTCGACTTGAAAAATGAACTGCCAATAACATGCACGAATGAAGACGGTGAGATGACATCAAGCTCATGGACTTCACAAACCGCTAATGATTTTCTCAAACTGGCATACGTAAACGCGAAATTAGACCCGTCTTTGCCATCTCAATATTTCAAACAAGATATCATAAATGTTTTACAAAGCTTGGAGATTCCTGGATGGTCTGTGCCCGGCTCTAAAGAATCCTCGTTGAATAAGAATTTATTAACTTTGACACAAATCAAGGGGGCCCT…	ARS423.0	4	751600	752000	54.06	0.04	2	ATAAATGTTTT	0	751950
GATGAAACGCACCTTATGGAGCACAAAAATAAAGAGAATGGAAAATACGATTGTTCTGAAGATGATTCGTTCAACTATTTAGGATTTTGTAAAGAAAAAATGTCTGTCTTTTGGGGCGATTTAATTACATTGGGAGTTATCGACAAAGACTGCCCAGATATTGGAAAAACAGATTACTTAGACACTAAACTTATTTTTTAAGCTGTATACACAATCAAGTATTTTTCTATTCACTGCGATAAAATTGTGTTTTTCAACATGTTAGGTCAATGGAAAGTCATTATTTTGAAGCAAAATGTAAAAAAAGAATATTATTAAGAGAATAAATTCTTTCAAAAATGTAGAGCAAGTTATGTGGAAATCAAAAGAATATTAGTTGATTCTATTATATAATAAATA…	ARS423.1	4	753200	753600	54.06	0.04	4	AAAATGTAAAA	1	753322
GTCTTCTTTGGTTGATCAGCCTTTTTTGGTTCTGTAACTTCTTTCTTTGGAGCGGCTTCTTTCTTTGGAGCAGCTTCTTTCTTTGAAGCCGTTTCCTCACTTGAGTTTTCCCTTGCGGCGACACCTTGCGATGGCTCCGCTTGTTCGGTAGGCTCTGGCTTAGATTCTCCAGAACCCTCAGCAGGTGCTTCACCAGGCTCGACCTGAGCTAACTCCTCACCAACAGTGACAGTGTCCTCTGGTTTGAAATTTAGCTTCGTAACAGTACCTGATACTGGCGAATTGACCTCAATATCAATTTTATCGGTCTCAATAGTGGCCAACAGCTCGTCCTCCTTAATAAAATCACCAACGTTTTTAGTATATTCCTTTAAAGAGCCTTCAGTCAGGGACTCTGCC…	ARS423.2	4	754800	755200	54.06	0.04	1	TATCAATTTTA	0	754713
GCAACGTGATCAGCGAGTTGGTTTCATGCGAAAAGGACAAGAAACTTGTTTTCCACTGGAAACTCAAGGATTGGTCTGCCCCTTTCAACTCTACTATCGAAATGACTTTCCATGAGTCGCAAGAATTCCATGAAACCAAATTACAGGTGAAGTGGACTGGCATACCCGTTGGCGAGGAAGATCGCGTGCGCGCTAATTTTGAAGAATACTACGTGCGTTCTATTAAATTGACATTCGGCTTTGGTGCCGTATTATAAGATATATTGTTCTCATGTTTCAATAAAAGTATGCGTAAATATTTACATACCACTATTGGCATAGATAGAATGCAATACATCATGTAGTTCTGTACGGCATCCGCGCGGCTCCGATCGCCCGTCCTACTTTTGCGGCCCGGCG…	ARS427.5.0	4	894000	894400	24.82	0.16	3	TAAATATTTAC	1	893958
ACCCCTCTATAAGTAAGGCCTCGGATTTTGAGAGTAGCTATATTAGTGCTAAACGATTAAAACCAGAAAGTAGTAATAGACAGAAAAAAAAAAATTCTTATAAATATTCTAGGGAGGAAAACACCAACGAGGTAGAGGAAAAGACGTCTCTTGGCAGCAGCTCTAAGACAGAAGCAGATAATATATTTAATGACCAGCTCACGTCAGCTGGCAATACTACATATGTCAGTAATAAGCGCGATGTAAACTTCGGGGCGAATTCGGCTGTAGTACTGCTCGGTTTGCCAACAAGTAAAAGTGAATCTCACCGACAATACCACAGTCCTTCGGCTTCAACAACTAATGAAGATGAAGAGGACATTGGTGTTGATATTTTAGTAGACAACCACATCGATAGTT…	ARS428.1	4	912400	912800	33.94	0.19	2	TAAAAGTGAAT	1	912545
CGCGTTTTCTTCAAATTTGAACTCGCCGAGCTCACAAATAATTCATTAGCGCTGTTCCAAAATTTTCGCCTCACTGTGCGAAGCTATTGGAATGGAGTGTATTTGGTGGCTCAAAAAAAGAGCACAATAGTTAACTCGTCGTTGTTGAAGAAACGCCCGTAGAGATATGTGGTTTCTCATGCTGTTATTTGTTATTGCCCACTTTGTTGATTTCAAAATCTTTTCTCACCCCCTTCCCCGTTCACGAAGCCAGCCAGTGGATCGTAAATACTAGCAATAAGTCTTGACCTAAAAAATATATAAATAAGACTCCTAATCAGCTTGTAGATTTTCTGGTCTTGTTGAACCATCATCTATTTACTTCCAATCTGTACTTCTCTTCTTGATACTACATCATCA…	ARS428.2	4	915200	915600	33.94	0.19	3	AAAATATATAA	1	915346
CTCTTACATTGAATGTCTCGAGATACCCTAAAAGTTTGGCATATTGGGAGAAGTTACTGAACTATATAGTAAAGGCTTCGGCACCAATATGCAAGTCCACTGAGCCTCAATTATTAAAGTTAATACGATGTACTTATTCTTCTATGCTGAATGAGTTTCCCTATCTAGAAAACTACTATATCGACTTCGCGCTACTGGAATACAAACTAGGGAATGTTTCTATGTCTCATAAGATATTTCAGCGCGGATTGCAAGCCTTTAACCAAAGATCTTTACTATTATGGACTTCATATTTAAAGTTTTGTAATAACGTTATCTCACACCAGAAGCAGTTGTTTAAAAAATATGAAACAGCTGAAGAATATGTTGGTTTGCATTTTTTCAGTGGGGAATTCTGGG…	ARS429.5.0	4	933600	934000	43.33	0.01	2	TTTAAAGTTTT	0	933833
TACATTAGAGGAAATGTTTACTGAAGAACCTTAGCCAAAAGGCATTGTCATTTATTAAAAGGTATAAATATGTAAATGTATACTTAATGACCGTTAAGAAAAACTACTAGCCTCATCACTCCCGCAGATCTCTATAATTGTTGTTTGAATACTTGATACGGTGGAGTGGCAAGGACAGTCTGCGCAGTCCTAATATCGATATTGATGTCTTCGATCAGAGCTTCCTTAGTAGTGTAGTTCAATTCGGGTCTGATATGACCTAAAATATTGAACTTGACCCTGGCCCCATAAAAATCATTTTTAAAATCATGTATAATATGTAATTCCATGGTTTTGAAATCATTTCCGTAGAATGGATTTTTCCCAACTGAAAGTACCATAGGAAGTACGGACAAATCA…	ARS429.5.1	4	935200	936400	43.33	0.01	3	AATCATTTTTA	0	935391
CGGCCGCACGTTGGAACGTTTTCGCCGATTTATTTATTATTATTTATACATGTTGACGTTGGTGCCCTTTTGTTTATACTGGAGCCTAAAACGTACCTCAATTAAATTTAGTGTGCCATATTATAGTGCTATTAAACCTTTATTTTTATTTTTAATTTTAAAACTGCTTTGGTTCTCTCCCTCCCTTACCGTTGCCACCTTAAGACTCACTGATATTTATTCATACTTACAAGTGCTATAAGAAAAGACTTGATTTATTAGCTTTACAGCGTTTTTACATTTGTGTCACTGCTATTATATTTTTGTTTACCTCTTTTTGTTGCTGGTGTTGGCGCTACCATTGTTTTTTTGTTTTATGAGTTACGTTTACAAAAGTTCTTAACATTTACTGTACGATAA…	ARS429.5.3	4	955600	956000	43.33	0.01	4	TATTATATTTT	0	955831
GTAAATAATGATTTGTCGAGTCCTATTGACCACAAAACCCGCGGAAACCTAGTTAGCCCAAAAGGAAATGGATAGCATATGAAAAACGAAACGAAACGTCCTTTTGCACGGCAGAAAGAGCTTAGTAGGACCCGGGACAAATGCAAGTTAGATTCCTTGATTCCCGAATGCTCGGTCTTGCGTTTCGCCGTGGCTGCATGGAAGGTCATCGTACGGGTACGGGCAGTCTGGCTGAGTGGTGCCGCCAAAGTGCAATAGCTGTCAGTAGGGCGTGAGGAATGTAAAAGGCAAGAAAACATGTACGAGGGAAGAGAAGGGGGCAAAAGAAAGATAATAGGAACGGTGTAGATGAACTAGAAAAGGTTCAAGAGATGATAAACGTGAAGGGAGTGTCATATC…	ARS430.0	4	1012000	1012400	35.09	0.14	1	AAAACATGTAC	1	1011948
TGGACGTCGTTGTAAAACTTGGTTTTTCGAAGTTGCTGGTGGTGGTGAAACAAACATTCCTTTGAGTGTGTGTACTCTATGCGTTCGAATAAAATTCTCTTTGTATTGCTGCTTGTGGTTTCGCTATTGAGAACTTTCAATATACGTTAAAAAATACTTGGAGTGAAATGAACAAATCTTTTTGTATGTTTCCTTAAGTTATTAAAAAACTCCATGCTGTTTTTTAATAAAAAAAGAAGCAGTTACAGGCGCATTACAAAGTTTGAGAAGAAAGGAAAAATGTCATTTGGTTATATAAATTTTTTTTCTTAATGGAGATTGAGGCAGCAATAAAATGTGGGATGAAAAAAAAAAAAAAAGGCACTTGAATAAGGGGTAGAATGGCAGATATTCCATGTC…	ARS430.2	4	1015600	1016800	35.09	0.14	8	ATATAAATTTT	0	1015932
CTCTGAGGAAGATTTTGAAATTATGTCGAAGTCAATCTCACCAAACTTTCTAGGTTCCAAACTTGACCTTGAATGATCAGGAGGTCGGTAAACGTGCTGCATCCTATATTGCTTAGAAATCAGACTTGGATTTTTAGATAGATACCTAGCCATAGGATAAGTTAAATCATATTGTAACTGCAAGACGGTACCGCCCTTGTCAAGCACTTCATATACATTCTGCGTACCGTATATGGGGGCCTTTGGAAAAATCCTCGGAGGAGCATTATTTTCAATTCCTCCATGTTTCCTGAAAATTTTAACTACCTCTTCTGTCATTTGGGACCTGAGAATGTTTGCGAAAGGAGTGGATGTTGGAACTGAGTTATCAAATAGAATATCATTTGTTAGACTGTAAGA…	ARS430.5.0	4	1026800	1027200	36.9	0.02	2	AAAATTTTAAC	1	1026892
GTCCTGTTAGAAGCCTTCACAAACACTCAAAGAATATGTTCAAATTTAAAGCAAGAGCTACAAAAGCAGCAACAGGATAATGCAAAGTTGAAAGTTCGACTACAGTCGTATGCTTCCAATTCTGATAAGATCAATGAAAAAGTCGGAAAATATAAATCTTGTTTAGAAACTCTTCAAGAAAGGATTGCAACGTTGACGAGCCATAAGAATAATCAAGAAACTAAATTGAAAGATTTAAGACAAAACCACCAACTATATCAGAGAAGGATAAGCGGATTTAAGACAAGTATTGAAAACTTGAACAAAACAATAAATGATTTAGGGAAGAACAAAAAGGAGGCGGATGCAGAATTAATGAAAAAAGGTAAAGAGATTGAATACCTGAAAAGAGAACTAGAT…	ARS430.5.3	4	1033200	1033600	36.9	0.02	2	AAAACTTGAAC	1	1033256
CCATCCAAATTCTTGTGAGTCTCCACGATGGCATCAATGACAGAATTTCTGTCCTTCAATGACAATGCAGGATTCAGTAATAAGTGACCTAATTTTGGATTCTTTTTGACTGTGCTTTCAACTTTTTGCAAAGATTGAAAGGCAGCATCAATAGAGGAGTTCTTTGCAGCGGCCTGATATAAAGCTGTTGCGTAAGTGCCCTCAACACCGAACAATCTCACCGGTGGGGGAGCAGCAGCTTTGGAAGCAGCAGCTCTTAAGCTTGATGCAAATGACCTGGTAAAGACTCTATTAAACATGATTGTCCACGGTTTAAAAATAATGCGGTAACTTGCTAATCGGTTCTTACTCTGCGGAAAAATATCTCAATGCCACAGTAGCCTGCTTAAATTTCCAAGT…	ARS431.1	4	1058800	1059200	37.91	0.12	2	TAAACATGATT	1	1058802
GCAAGGTCCTAACATGTTAGAGATTGACCGAAAGGAACTAAGTAGAGATGATTTTGATATCAGGCAATTTACGAAGAAATACAATCTAACCGCTATTGGGGCACATATCTGGAGAAGCGAATGGGATGCCAAAGTCGCCGCCGTCAGAGAAAAATATGGCCTACCACCTGGAAGGGTTTTTAGCAGAGTTAGAAGGTGATCCTAAATAGTATGACATTATAGTATCCTGTACATATAAAATAACGTGTCATTGTTAATAAAGCTTGATGCAAATAATATAAAGTAAGAATCTGAAAAATTTTTGGAATGTGAATTTTGTTTACAATACGATACGTATGATATTAGTATGTTCTAGAATATATACATTTCATTTTTTTCCTTATTGTTTGTGCACTAACG…	ARS431.5.2	4	1111600	1112000	49.98	0.02	2	GAAAAATTTTT	0	1111781
GGCATTGTTCCTTGGTCACCAATTTCTATTTACCGGGTGATGGCGGCGCGCCACAGCGGAGGGCATTGCCACATTGCTGCGCGATCAAGGTTGGTTTTTCCAAAGAGACTTCAAGAGTACTAAGCTTTTGATGTAGTAATATTTGTCAAAGAGTTTTAAGAGCAAGATTCCATTGAACAGAGGTGCTGGAGTGACGAGCGTGTGTGTTTTTAGCCTATCTTTATTCGTTGAGCCTGTAGAAGAGCCGTTCTTTTAAGTACACCCTGATTAGATCCCCCTATTTGTTGCAACCGTTCAAGTTTTGTAGATCGGAAGAAGAGCAAAACAGAAAAATAAACAAGGCGAGAACGTAAGGTGTCATTGCATTAGCCATTAAAAACCATATTCACTCTTTACATT…	ARS431.7.0	4	1140800	1141200	26.75	0.03	2	GTTCAAGTTTT	0	1140924
TAAAAGGTTGTCCAAAAGATTGTCTGGGGAAATTCATGCCCGCATTTTTGCCTAAATTATTTGAAATCCTGGACCTGCTGCTATGTCAGAAATGGTCCTCGCATATGAATGATATGGACATGAACCCAGTTCCAACTGACGATGATCAAATGACTGAAGAAATTTTGGAAGAGAATTTGTTGAGACAACTAACCACAGTTGTTGTTAGAATAGTAATTGATTGTGTTGGTCAAGGCAATGCCAATCCAAACAGTGCTAAAAGCAGGCTAAATAACCATCAAATGGAGATGAGAAAAATTATATTTAATGATTTAAACACCCTTGCTCCATTTTTGAAACTTTTGAACCATTTAATTTCCTTCAAGGATACAAAATGTTCATTTAACTCCATCCTAGTAA…	ARS431.7.1	4	1144000	1144400	26.75	0.03	2	AAAAATTATAT	1	1144231
TGCGGCGTTCAACGGTGCTGCTTTTTCACTTTTACAGTATGATATGTCTTTCACATTGGGTTTTAGCTATAATTAGATAAAAATATTTTAAGTTGCTTTTGAAGTGTTTAGTAGGGCGTGTTTAGCAGGGCATGCTTAACAACCCCAAATGATCTTAGCGATGAGAGTACTATTTTCTAGGGTTGTTTTGTGCAGCCTGTTAATGTAGACATCAAGAAATTAAATGCGATCTTAATTCATTCGGAATTTCTTTTCACCGTGTGAATGAAATTTTTCGAGATGCTAAGTATAATAAAAATAAAAAAATAAAATCGCTTTTCTTCTAGAGAATTTTTCCGTGAGAAAGTAAAAACACATAATACTAGCTTAATAAACTTTTCTTTCCACCACCCATAGGAT…	ARS432.0	4	1156800	1157200	46.73	0.14	8	TAAAAATAAAA	1	1157039
CGGGCCGGCGCACTCCAATTACCCCTACATTAATTTCCAAGTAGTAGCAGGGGGATGAACATGTGAACATGTTGCAACAACTGCGGTGTCTTCTTAGGCTTGTGTTCGGAATTTCTTCCTCCTGTTTCGGTGTGTGTTGCTTATTTTTTCCTTGCCCCTTTGCGGCATCACAGCAGCCGTTGTTCCGTATTCCGGCTGATAAGCATGGAAAGATTTTCCAACAATACTCATGAAAAAATGTGTTGGTGTCTGAGTAAGCTAAATTTTCCCAAATTTGATGCCATTCAACCCGAAAACTTAAAATGTAAAAGGGGTTGAGATAGTGCAGCTGTGTGGCAAAAGTCAAAAAAAATCTGTTCCTTTCAAGGAAATGAAAAAAGGAAGGAAAAAATGTCCAGG…	ARS432.2	4	1162000	1162400	46.73	0.14	2	AAAACTTAAAA	1	1162322
TGGAAGAATATAGCTAAGAAAATGCGCACGGAAAAAAAACACTCCCGAATTTCTCCGTGAAAAGAGCCTACTAGGGGATAATAGTAGGTATCCGTTAATATTACCGAACTATTGAAAACCTACCAAATGCAAGAAGATGCAAACGAGCTAGAATGTTCCGCGAATAGCTCATCTTACAATTTTTTTCTTTTTTCAAGAAAAAGAAAGTATTTTTTTTTCCTTTCATTTCATTGCTCCTCCTCCAGGTGTTATCTCGAGAAGATGAAGGCTGTCTGCGATGACGAATAGGAAAGAAAAAATTTTCCTTAATTTTGCTTGCTTAATTCTTATACGAATAATTCTTCTTAATCAACATCGGGCTTCATATTTACCAACACGCATTATTGATTAACAATACTT…	ARS432.5.1	4	1165200	1165600	31.79	0.15	3	GAAAAAATTTT	0	1165426
TCAGAACATTATTAATAAATTCAAATCTTGCTATATCAGGCGACGGGTTTACGTGGTTAGTCGCAAGACGGCAGCTCGACAAACGTGCTATGCGCAACGACATGCCAAACAGGGATATTGAATATGATAAGCTGTTTATATTGAATACGTACAATGCGGGAACTCCCTTCAACTTCTCTACATCTGGGGTAATGAATGAGCTCAATAACCAATATACCAACATGGAAAAACAACGAGCCAAAGAAGCCGGTAATCTTGAAGATTCTGAGATGACTGCCAAGCAAGCCAAGACAAAATTTATTTATGAAACCCAACAGAAAGGTTTTTCTGGGAAAGAGGTTTCATATATCCCGCTTTTAGCCATTGATGCGTCACCAAAAACATGGTTAACTGATTATG…	ARS432.5.2	4	1169600	1170000	31.79	0.15	1	AAAATTTATTT	1	1169916
GAATTGTTGTCCTCTTTGGAAGGTAAGGGCTCTTTGGAAGAAATCATCGCTGAAGGTCAAAAGAAGTTCGCTACTGTTCCAACTGGTGGTGCTTCTTCTGCTGCTGCCGGTGCTGCCGGTGCTGCTGCCGGTGGTGATGCTGCTGAAGAAGAAAAGGAAGAAGAAGCTAAGGAAGAATCTGATGATGACATGGGTTTTGGTTTATTCGATTAAGGAATTTAATTAATAAACAATTTTCTTGTTTTCCTTCATTTTACAAAATCTGGTGTAAATCCTCGATTCCATTGTGATTTAAAAATAATTAATTACTGTATAAGATTCTATATAGACAATTAATTGAAAATAGTATTACTTCTTTAACTCGCTTAGGATTTTTTTTATTTTTTCTCTCTTTTCCGG…	ARS433.0	4	1239600	1240000	57.5	0.13	2	TAAAAATAATT	1	1239894
TCACTTCTTCTCTCCAATTCTTACTAAATTAGCGATAAATTCTACCCTTTCCATAACTGGCCGTTCTTCTGCAAGAGAATTTTTCCTACTTGAATAGGCATACTTGAATCTGAAAAGTAGTCATAGATAGTGAAGTCTGCTTTATTAATAAAATTCCAGGATGTACTCTTGGAGATCGAATCAAGTTCCTAGAAATCCTTTGAGAAAGAAGCGGTGAATACCCGTAGGTAGGATTTTTTCACGTAATTAAACCGCCTTATCTTATTTGTTGCCAGAAAACTAGAGGATGGAATAAACATATTCCCTAATGGTGTGGCATTTACCTGTCTGTCTAGTTTCTGTTAGTGCATTCCAATGTCAGCTGCTTCGCTACATTGTTTCCAATGAAAGCTTGTATTT…	ARS437.0	4	1341600	1342000	38.62	0.05	1	TAAACATATTC	1	1341974
TACGGAGTATGATACCATTCTTGACATCATCAACACACCATCGCAGACCCACGTGGCCGCTTCGTGTGCCTTGAAAATACAGCCTTAAACGCAATCTCATTCGCGTTCTGTGGAAATTGTCTCGGACTACACGCTGGGCGTGCATCACCAGTGAAAATGCCGTACCGCCCCGCTTCCGGTTTTGTTTTTATAAATCCGACTGGAGAAATAGACTTCTGGGTTTACACCCCGGAATAATACTAAAACCAAAACTGGTAAATAGGGCTACAGATGAGCAGGAAAACGTTGCCGGAAAAAGTTTATTTATCCGAGAGAATAATTGATGAAGAAGTAGCGGTATGCACAGTAGCGGCGGAAGTATTAGCAATTTTTACTCTGGTGTGCACAAGAGTGTTCATC…	ARS437.1	4	1345600	1346000	38.62	0.05	2	AAAAAGTTTAT	1	1345659
CCATTGATCGTTTTGGGCTTTAGAAATGTACTGATGATAGTTGATCTTTTTGATTTTCTCCACTCTATAGAAGCTGGATAAAACATCCTCAAGTCTGTACGTGGAAGCGTCAGAACTCATACTACCTCCTCAGATCTTGATATCCAGCTTAAACGTTCTTAAAATATAGTTACACCTTACTTCAACAAAGTAATTTCCGATTTCACACCATTCGTCTTAAAGGGTTGTTGTAAGAGTGTACTACAATAAATACTACACTACTTGATCCGGCACTACCCGGTCCCTCCACCTGAAAAAATGTTTCAATTCTTCGCTTTGTTAAGCGCGAATATATCGATGCTATTTTCTAAGGATTGTTTATTCAGTATGATAAAACAATGAACAGCAGGAAATGCGGAG…	ARS437.3	4	1350000	1350400	38.62	0.05	1	AAAAAATGTTT	1	1350101
GCGGACCGGTCGAATGAGTATAACGAGGGGGAAATATCAAAGGGCGCGGAGAATGCCACATGAGTTTGATGATTTATAATGTATACGTAAAAAAAAATATCATAGATGAAATAAAAGTTTCTTAAGAATATCACAATGACCACAATAAAGTGTGGATGTTGTTTAAAAAAAAGATAGCCCTGTAGGGGGCTCGAACCCCTAACCTTATGATTAAGAGTCATACGCGCTACCGATTGCGCCAACAAGGCTATTTCGTTGGAAAAACTAATTAATTTTGGAAGTAATAGGACATTAAACATGTTTGTTGCAATGAAACTTTAAAATATCATCTGTTTAGTTTTATTCATGTTACTTGTTGGAATAAAAATCAACTATCATCTACTAACTAGTATTTACGTT…	ARS437.4	4	1352400	1352800	38.62	0.05	2	TAAACATGTTT	1	1352573
TAACAAGGGCCAGGAAATTATTGACCAACAGTTCCAGCTCTACCAAGAAATAATCAAGAAACGAATAGAACTAAGCTACAAATTTAAGGGTATTATTTCTGTAATCAATGATAGGGCAGATGCCCTAGAAGAACAGGGTCAACAACTAGAAGGAAAAATTAAGAAAGTTAAAACTTTGGCTAATGAAATTCTCAATATTATATAAACGCTTCATAAAGTTGATCAAAGGTGCTATATTCAGTAACAAAATGCTTATAATTAAGAGAATACATCCCTAATAATGAATCATATCTTTCATATTTTAGATGATATTGAAATTATTTAACTATACATAAGGAGAGTCCTCAATGAAATGGAGTAAAACAGACGACATGATAATAACTATATCAATTCATGCTT…	ARS437.5	4	1354400	1354800	38.62	0.05	1	TTTCATATTTT	0	1354711
CTCCGGTAGACCTCGATGCCTGAACCTTCTCCCTCATCTCGAAACGGTACGACCTCTGAGAAAACGATATCAATCAATGCGCGTCTTCCAGATGAAATTCTTCGGAATGCCCATAATACGAAAAACTAACGATGGAAAAAATACTATAAATGTATGGGTGTAATTTTAACCGAATGTATGGATGTTACAGGGAGCTTTATATATGTAGAAAATTCCAGACGTTCCAAACAAATAAGTGAAAATCAACACGATTGGGAAAGTACATGCCAGAGTTCGATGTTTAGGTTAATGATAAAAATAATTTTTCTCTAATCACCCTCCATTTTCGATAAAATATCAGCGTAGTCTGAAAATATATACATTAAGCAAAAAGAATGTCAAACAAGTTTCACTGTGACG…	ARS437.6	4	1355600	1356800	38.62	0.05	4	TAAAAATAATT	1	1355973
AAAGATGCCTTTCCCAGTCCCATATGCCCATCCCAAGATCATGCCCGGGAGAGCAAATGTCGCCCCAGCCAGGTCGGACACATCTGTCATTCGACCACTAAGTATTGTCAAAGCTAGGGTTAATTGAAGATAGCTCTACATGTTATTAGTAGAGTTTTTAAACGTTGAGATACTAGTGAACGTATACACAAGAGCGGATAAAAGATGTCTTTAGTTGTCCAAGAACAAGGTTCCTTCCAACACATTTTACGGTATGTTTATTATTACTAGTGAGCTATGACAAAATCGGCTAAAAACTTAAAAATATGACAGACAAGAAAGGAAATTCATTCACCTCTTTAATCGTGGCGATTATTCGCTAACGACGTGATTAAATATAATAATGATGTTCCCGGGCTG…	ARS437.7	4	1359600	1360000	38.62	0.05	2	AAAACTTAAAA	1	1360001
TGTTCTGAAACCATATTTGAACCGATTTTTCGGACATATTACATTGCTCGGATAACTCTATCCTTTTAGCCTTATTGGGCGTGGGACATTCGTCAAATGCTGTTTGCAATATCCCAAGCTCATATGATGAAGTTCTTCTTCTTTTCCGACGAGCTAACCGAGCATTGTCTATCTTAGGCTCCTTCTTTGGAAAAGTTTCCTGTGAGTGTGTAATAAAGGCAAATGACCTTTTCTTTTCTTTTCTTGTGGTTGGTGTGAGAACAGCCTTTGCAGCAGATAGAGGAGTAAGAATATTAACTTTTTTATAAGAGTGCATACTCTGAGGTGGCTGCTCTTTAGAACAGACTCTGACCGTTGGCGTGAATGGTGAATGAGAGCTCAGCTTCTTGGGCTTGGATA…	ARS437.8	4	1361600	1362000	38.62	0.05	3	ATTAACTTTTT	0	1361794
GGTGAATACTTTTCCACCATTGAAAATTTCGTTGAGAATCACATTGAGTCTGGGGACTGTAAAGCTTTACCGCAGGGGTATACCAAGAAAAATGAAAAAAGATCTGGAAAATTAAGGAAGATCAAGACATCTAATGGTCATTCTAGATTCATATCCACTTCGCAAAGTGTTGTAGAACCTAAAGTACTTTTCAACAAGGATGCCGTAGAGGCTATGACCATAGTGGCTAATAACAGTTCGGGCAATGATATTATATCCAAGTACGGAAACAACAAATTAATGTTAAACTCGGAAAACTTTAAAGTCGACATACCCAAGAGAAAGAGAAAATATATCAAGAAAAAGCAGCAACAGGTATCTGGATCGACGGTAACCACACCAGAGGTAGCTACACAAAAC…	ARS439.5.2	4	1387600	1388000	48.03	0.03	1	AAAACTTTAAA	1	1387833
CGCAACTTCAGAGCATCAAGTTGCTGTTTTATATTTTTAACTTGTGCTTCCCTACCACTCACGTCTTCGTTTTCATCCCTTTTCATTACGATTATGCTTCTGTCCAAATCAACTATTGTTTCCTCAACATCCTTTAAAATATCTTGTATTTCCTCCTCTTGATCGTCATCACCAGCAGTATTGTGACGAGTTATGTAATTGTTTATGCGGTTCAATTGCTCCTTGGTGTCCTTAACAACTTGTTGAAACGGATCTTCACTGTTGTTCATTTGTTAAAGAAAGGATCTTAGCAATACAATTTTACAGTTAAACGTCTTTCACGTTTACTTCAGTTACAGGGAAAACGTAGAAATTAAAATGTTCACAAACCTTGTCAGAAAGACAGCAAATATAATTTTA…	ARS440.0	4	1398400	1398800	47.73	0.02	5	ATACAATTTTA	0	1398714
AAGACATCAAGCTGGTAAAAACCAATGGTTCTTCTCCAAGTTGAGATTCTAAGAAGCTTTTTTCCGAAACCTAACTTTTTTCTGTGTACTATTATTATTTTCATAATGCAGTTTATCCTTCACATAATTAAAAATTCATATTGTATAAACTAAAACAAACACTACCACTAAATATTTGGCCATCTATCTGCCATATTGGTCGTAACACAAAATGCCCAATGGAGCCTGGTAAGTTCCTTATTATTTAACCCTAAGAACTTTATTTTGATCATTGCGTGCAAAATGATATTGTTTACAAGTTTTTTTTTTCCAGCTTCTTTACATATAAAAGGGAAGGATTTTGAAATTATAAATGGCATCTCAAATCGTCTCTATATCTTTTGTTAATTGGATTTTTTA…	ARS440.1	4	1402800	1402800	47.73	0.02	1	TTACAAGTTTT	0	1402795
GATCTCGACGCACTCGCACTTGAGTTTATATCGGTAGCAGTAGGAGAGCTTGGTTTTGATTTGTCTCTTATCCTTGACTTAGAGCTTGATCTTGACTTGGATTTGGATCTAGATGAACTTGGATTGTCCAAAACATCAAGCATGGACCTCTGCGGGGTAGCCACATGCCTTGGAGGAGCACCACCTGTGATGACTCTTTTCAGTTCTTCAAAGCCCGACTCCATAGAGTGTGCTCTCTTTTCGTCTACATCCCCATTTTCAATACTATCAGTGATGCTATCGATTTCTAATGAAAACTTTAATGAAGATTCCAAAATAATATTCAGTTTTTTCAAATGCCTCTGTCCCGGTGGTATTGATGAATCATGATCGGCGTCATTTAACTGCTGAGCCATACTC…	ARS440.2	4	1408000	1408400	47.73	0.02	1	AAAACTTTAAT	1	1408206
GCGGAGACCTGTAAGATTGCGCCAATGACAAACATCAGATTCGAACCCATTAAACAACGTTTCCTACCAAATATGTCAGCTGCAGTACCGGCGAAAATACTGGTAATCAAAGCTCCCAGAGAGGTAGCCGCAGTGACAATTTCCTTCTCCCCATAAGTAAGTACCTTGTGGTCCAGATCTGTGCCGATCGAGATCAGCGCACTGGATATATAACCAGTGTCGTAACCAAACATGAAACCGGATATGGATGCGACAAAAGTCAGAGTGATGATGAAGGGCGAAAGAGATTGGTTAAAAGTGATCATGACCGACGTGTCATCCTCGTCGTTCACGGGTTTAATTTGAATCCTATCTTCATCATCGCTAGCGGGAGCCCTCTGTATTTCATGTGACTCAAGT…	ARS441.0	4	1445200	1446800	39.99	0.03	5	TAAAAGTGATC	1	1445223
CAGAATATATCGAAGAAGAATTGAAGATGCAATTGAATAAAAGAACGGGGAGAATAATGCAAGTAAAGTACGATGAGAAATTTCAAGAAATGGCAAGAACTATTCTTGAGTCAAAATCATTCGATCTAACCACACTAGAGGAGGCCGATTCATTATATATCTCAATGGGACTGTAAGGCAACAATCAAAAGGGGAAAATGTCAACGCTTTATAGAAACCTTGTAATGCTTAATATTAACTATATATAATTTATATTATTTTCGTTTTAGGAAAGAACAAAACTTATAGATAATATCAAATTTAAGCAGAAGTAGCCTTAGCAGAACCGGTTTGGAAACCGTTCTTAAATCTTCTGGAGACATGCTTCAAATATCTCATTCTACCGGTACCAGTAGTGTG…	ARS441.1	4	1450000	1450400	39.99	0.03	3	TATCAAATTTA	0	1450180
ATTCCTGTACATACTACCCATCTTTACTTATATATTCGTTTACCTCTTTGTTCTTTATCTACACATAGTAGTGCTTTTTGTTACCGCTTTCTATAGTAACCTATGCTTACTATTCCAGCCATGTTTCCAATCTCATCCTTCCCGCAAGTGGCAGGAAGATTCTCAGTGATAATATTAGTGGTGTACGGAGTGCTTGAAGAAAAAAAAAACTGATATAGAACCCAAAAATGTTCGGCTTTTAAAATACAAATATGTACAGGTGTTAATGTCTAAATAATGATAATCCAAACGCGATAATTTTTTTTTCGCGTTTGTTTTTGTTTCAGAAGAATAAGTAAACACTTCTGCCTCTCCCAAGAAAGTTTAATTTCTCTCCTTATTTGCCGTTTCTATCGTTAC…	ARS441.2	4	1451200	1451600	39.99	0.03	1	GATAATTTTTT	0	1451115
TATGGAGATAACTCTTCTCTTATCAAGCGTGTATTCACTGCTCGCATTGAATTCTAAGACATGTATTTTGCCTTCCTTAGCGGCCATAATAAATTTTAATAGTATTAAGAGTAGCATTGGCAACTGAACCGGCTTAAGGAGAATGACCTTCATTCTAAACAAGTTGTCCACGGAGTTTTGCAATAATTACTTAATAACTTTGTTTAACCGCCCAGTATGTGCCACTTTATTAGCTTTGGCCTTAATGTGGACAGCTGAGATGAAGGTGGATCCTCTATGACTATCCCCGAAAAAAATGTAAACTAAAAAATATTGGTTGCTAAGAGATTCGAACTCTTGCATCTTACGATACCTGAGTATTCCCACAGTTCACTGCGGTCAAGATTTTTTCTTGAATCA…	ARS442.2	4	1461600	1462000	35.91	0.05	3	AAAATGTAAAC	1	1461684
AAATAAGCAAAAATAATATGAGCGAAATATTATGGCAGAACAAAACGAAGGAGACAAAACATGATTGCATTACATTAGCACTATTTTTGTAGAACGCCTTCCTTATTCAGGACGTTCTCAACTTCATTGACCAACTTTTTGACAGCTTTGAATGAACCAGAAACTTTCTTGAACTGCACAACGCTCATCTTACCTCTCGGATAAATATTAACCTCAAAGAGTGTTGAACGTAGTGAGAATATATTATCACTCGATAGTTTACCCGTTAAGGTCAGATTGTTGGGGTGCGATTTTATATTTTTTAAACCATACTGAGTCCAACCACGCAACAGCTTCTCTAAACCATTAAACAATTGTTTTGCAGAAATCTTGGCATACAATTCCATTGTTTTGTCCGAA…	ARS442.3	4	1462400	1462800	35.91	0.05	4	TTATATTTTTT	0	1462560
CTGGGATTTGAAATAATATGCTAATTGAATTGTTTCTTCAAGTTTTTTTTTTTTTTTTTGAATCGTGATTTCTGCTTTAACACCAGAAATCAAGAACTCTTTTCCAGTATGGTCCGTTTCTTAATCTCTCTTTATATTCTTCATCTTCTTGTTTTAATAATTCTTCATCAAAGATGTTTCTATGAGAAACTAAGTCTACTTTATCAGCGGGAATGAATAAACTCCAATCTTTTTTCCAAACTTTGTAAAAGATGTATAAAGCAATCCAGATTGGCATAGCCAAATAATTCTCAAAAAATGATTGGGCACTTAACTTACCTCCTCCACCAATTGGGGCAATGGCAACCCAAAATTGGGCGATTAAAGCTAACACCATCATAAGGACAGCGTAAGCCGACC…	ARS442.5	4	1465600	1467600	35.91	0.05	1	AAAAAATGATT	1	1466659
CCGCTTTCTTTTCATGCGGCGTTATTCTTTTTTCCTATTTTTGATGGTCCCTGTGCCGTTTCTTTTTCATGTTCACCGGTTTTTGGCGCCGCATACCGTACGGCGGGGCACTTTTGAAACGTTTTTGTGCATCCTGATGCCGTTTTCAAGGATCGCAAGCACGTCGCATAATACGGTAATGCCGAATTAAGGCTACGTCGTCATAGTAGGTTAGTCATGCGCGTTGGAAAAAGAAATGACCAACGCGTTGATTACGTAGTCCCCAAGGAATAATGCTTTTGAAAGTGAAAAAAAAAAATAAAACTGAAAAAAGCCATGCTGTTTCCATCACGTGCATGTCACGTTTTTGCCGCCGAACTCTTTGATCATGTGATATGAATATGTTGGGTTACCCAGCTT…	ARS442.6	4	1468800	1469200	35.91	0.05	1	AAAAAATAAAA	1	1469087
CAGCAGCAGGGGCAAGATGACAACCCTGTTCCTGTTCCTGTTCCAGTAGAATCTGAGACGGCTTTTGTGCCATCAGCATTCACAGCACCACCGGTGCCAACAAAGAAGAAATCAAAAAATAAAAAGGGTACCCAGCCATTGGCAATGGATGACTATTTTAATGAAGGCAGAGATAAGTCATCTACCGCTGCGAAGTCAGCAGAATCTGACATCCTCGCCCCACCACCACAAAAACAGTCATCCTCTGATTAACTTTCCTGGTTAGTCTTTTGGTTTTGTTTCATAGCAAAATTAAATATATATATATAAGCTTGCTTTCCCTTCAAAACACGTAAACGATAGTTGGCAATGTACGAAAAGTACCGAGACTTTTTTTCAAAGGCACGCGTGTCCTTTTTT…	ARS446.1	4	1478400	1478800	34.96	0.03	1	TAAATATATAT	1	1478388
TCCCTTTTATTACTGCTCTATGAAAGTAAATTGTCAGGCCCCCCGCCGGGGTGACCCGATAAAAAGCGCGTCGCTCCTGATTGGTCAAAACAAGATCACAGCGCAGTTACACATCTATAGACAATGTACATATGGCTAATAGACCTTAATAGTGATACTCTGTTGGTTTTTGGCCTGCTGTGTTGGGGAAACCGCATTGCAGTAACGACTTGTCCACAAGATGAGGATCTTCAGTGAGGTTCTCTAGTTTTTCTCTGTCTTTAACGAGGATCATACCACAGTACCCCGTGGAGTTAATGTTTAACATCAATGGCGGTCCACTCTTGGCATGCGATCTTGGAACTACACAGATCCATTTCTTGGTCAGTAGCACATTGTATGACTTGGTCAACTCCGGAG…	ARS447.0	4	1496800	1497200	43.37	0.11	3	GTTAATGTTTA	0	1496928
GTAGCATCTTGAGTGACAGTCTTGGTGTAAACATGCCCATTTTTGGTAGCAGTTATCGTAGTAGTAATACTTTCGCCTAAAGCGGCAACGGTGATAGCAGATAATACAAAAGCGGAAGACAATTTCATTTTCGGGTATTGTATTGTTATTACTATTATTATTCAGGCGAACAAAAGGACTTTCTGAAAATAAACACGGCATTAGGAATATAGAAAAGTTAGATAATCATTAGTTTAAATAGTGCAAAAACTTCACTTCAAAAATGGTATACGAGTGTCATATTATATTAGATATTCATTTTTTTGCACCCTTTCCTAGAACTCGCGTATTGAGCCCTGAGGTGTCTGTCATTACATTATGCCAAATGTGCGACAGCGCGGTTTGGAACAAACAGGGTGC…	ARS447.2	4	1504800	1505200	43.37	0.11	1	ATTCATTTTTT	0	1505054
AGCTCACTCACAAAATATTCTTACTCCGAGTACGACCATAAAGCAATGCCGACGAATAGTCATACTAAGGTACTATAAAATCTTTCCGTGCGCTTAAGCGGACACCATGCCATAATGTTAAATGTAATAATTTAAAAGCATCATAAGAGTAATTTTCCAGTATTGCTTCAGTAATGCAAGGCCTAAAGAAGAACGCATTTTGGTATGGTAAACCTCCAACCTACTAGTAATTAAAAAGCTTTAGTTTAACCTGCAGTTCGGGACACACTTCGGGCATAACGTACGTTTATTATAAATTTTTTATATCTCTTGCGTACCCATGTATATTCCAGAACAGTCAATGCACTTTTGTGAGCCATTTATGCTACTTTCATATTCCCCATTAAAACAGGTACTACT…	ARS503.0	5	7200	7600	49.46	0.02	4	TAAATTTTTTA	1	7161
CGTGTTAGTAGATGATCTGTTATTTCGTTAATAGATAACTTTACAGAAGCACCATCTCGCTACCATTTATACGCTTTGGAATAAAAATCAGCCCTTGTAAATTTCACATGCTCGACCGTTTAGGAGATTATGCATTTTAAGTCGTTCATTAATATTACTGTAGCGAGGAAGATGATTATTGATTTCGAGGGGTATAATCATATGCGGCGTGAAAAATAATGACTTGGGTTGGAAGCCGTTAGGATAGTATTTATACTGTCACGAAATTTACAGGAAGTTGTAAATATGTTGCATAAAATTTTTGATAGCAAAGCCACCGACTCTTCATTATGGAGTTTTTTTTCTCTTATTCTCCTGTTGCCTTCGTACTGTAAACCCCAGTCATGTAAAATGCCATAT…	ARS503.1	5	7600	8400	49.46	0.02	5	ATAAAATTTTT	0	7844
TATTATACTTGTTCTTTAATCAAGAGGGGATTGTACTTTTATTTGATTTGAGGCCGGGTATCTTGATTTCACTTATGTTATACTGTCTCTTAGTTGATAAATTCAATGTTACATTTGCTATCTCATTTTCAGGTCAGCAGCTATATTGACCTTGCTTACATTCAGCGCGTGTGAGGCACTACCTTTAAAACTCTTGTGCTCCTTATTCACCATAGTCTGTTATCCGTTTGTTCTTACGGAGGAAACTGCAATTGATCATTTATGAATCTTTTAGTGAAATTTAGACACTATTAAAATTTAATAATAGGCAAAGTACGTCAATTATCATTCTTGGTTCCTGAAAAGTTGAATCTGTTATGAAGTCTGATATTTGGGGTTAGCATTGTATACTTCCCTTGA…	ARS504.2.0	5	12400	12800	59.09	0.02	3	AAAATTTAATA	1	12344
GTGTAGTTTCAACAAATGCAGGTGGTTTGAACTTTTTAAGATATGGGTCTCTACACGGTAATGTTTTGGGTTTGGAAGTGGTGCTACCCAACGGTGAGATTATCAGCAATATCAATGCCCTAAGGAAGGACAATACTGGTTATGACTTGAAACAATTATTCATCGGTGCAGAGGGTACTATCGGTGTCGTTACTGGTGTATCCATAGTTGCAGCAGCAAAGCCAAAAGCCTTGAATGCCGTATTTTTTGGTATTGAGAATTTCGATACCGTTCAGAAATTATTTGTCAAGGCTAAAAGTGAATTATCTGAGATTTTATCTGCTTTTGAATTCATGGACCGTGGCTCCATTGAATGTACGATAGAATACTTGAAGGACTTGCCTTTCCCTCTGGAGAACC…	ARS504.2.1	5	16400	17600	59.09	0.02	1	TAAAAGTGAAT	1	17153
TTTACCAGCTTACAACAATAACGCCGTTGTAGGCGGCTTGTAGGTACAATCGCAACGATATCTGGAGTAGATGGCATTGAAATTGAGCTGATACTGTTATAGTTTACAAGCAGTACATTGTCTCATTACATTGTCTCTTTGTTTGACACCCACACATATTTGGTGTTCGGATGTTAAACAGGGTATTTATCTTGTTTTAGACTGGTACGAATGGGATAATGGCATAAGGTGGCTTCATTTGTTTGAGTATAAAGGTCTCCTTTATAATAATTAAATAGCGGGTATATAATGCTAAATATATTTTGTACAGTTAGGGTAAATTCCAGATTATTTATAGCGGTCTTGCTTTATTCTCAATGTTTGTATGGGGAAATAGTTCCATCCTTCTGTTGTATGAAC…	ARS507.0	5	53600	54000	36.95	0.27	2	TAAATATATTT	1	53864
TATCAGCGTGGTATCATCTCTTCCTTAGGGGATTTGTATGATTCACTGGTTAAATATGTACCTCCGGTTGTCAAGACACCCAATGCTGTCGACCAAGTTGGCGGTTGGTTGAATGGTCTTAAATCCGTATTTAGCCGTGGCAAACCTAAGAACATTGGGGCGTATGTGGATGTATCCAAAATTGGTAACTCGATACCTCGAGGAGTTTACCTATATGGAGATGTTGGCTGCGGAAAGACAATGTTGATGGACCTTTTTTATACTACAATTCCCAATCATTTAACAAAAAAGAGAATACATTTTCACCAGTTTATGCAATATGTTCACAAAAGGTCGCATGAAATTGTTAGAGAGCAAAATTTGAAAGAACTAGGTGATGCAAAAGGAAAAGAGATCGAT…	ARS507.1	5	56800	58000	36.95	0.27	5	GAATACATTTT	0	57020
CAACTTGATTCACAAAATATTATTCGTCGTATATCATGGCATATAGAATCTTGCTGGAATAAGAAGCAAGTTTCATCTTTGATCTTATGTATATAGTATTAATATGTATTATTGTTGGAATAAAGATCAACTATCATCTACTAACTAGTATTTACGTTACTAGTATATTATCATATACGGTGTTAGAAGATGACGCAAATGATGAGAAATAGTCATCTAAATTAGTGGAAGCTGAAACGCAAGGATTGATAATGTAATAGGATCAATGAATATTAACATATAAAATGATGATAATAATATTTATAGAATTGTGTAGAATTGCAGATTCCCTTTTATGGATTCCTAAATCCTCGAGGAGAACTTCTAGTACATTCTACATACCTAATATTATTGCCTTAT…	ARS507.3	5	62000	62400	36.95	0.27	2	AATAATATTTA	0	62320
TGACTTGAGCCTTGACATTGATTCTAGCACCACCCATGGTGAAATGGACAACCGGTGTTACTTCACCAATAAAAACCACAGTTTCTGGAGTAACGTCAGAGCCAAATTCGTTGAGAATAACGGTACGTCCCAACGGATCAGCCTTGGTAGTGAAGGAAGAGTATGTTTGCAATTCCTCGCATAATTGGGCGACAGTGATTGGTAAATTATATTCAGAAACAACTTGAGATAATGTCAATTTCTGTACAAGTTTCTTGAACATGTAAAAATCTAAATTATTCTTCAAATCTGTGTACATTTTTTCGCCCATAACCAATAGTGCTCTGTTATCCTCTTGAGGACAAACCTTTTGAATAGCTGCAGTGACTACATCTCTTGTGGTCAATTCGTTGACAAATC…	ARS507.5	5	65600	66000	36.95	0.27	1	GTACATTTTTT	0	65833
CACTGGAGGCCTTGATAGAGTTCCCACCGATCGAGGAAGCCTTTTCGAGGATGGTTACAGGGATGTTATACTTGTTAACCAATTCATTGGCAGCAGCCAGCCCGGCCAAACCGGTTCCAATAACAACAACGGGAGAGAGAGACATTTACAATTACGGATGAGGGGTTGTTGAAGTGAAGATAAGAAAAAAAAATGGGGTGCTATGTCAGCGTATTGTTCTCAGCTTTTATACGTGCAATAGATTAAGCTGTTCAGGAACGCGACGCGTTGCCCCCGTTACCGTTTGAAAAGAAAAAAATTTTCTTTTTCATACCTGTCTCTATTGTTTCAGTCATTCACTGCATGATGACAAATGAAAGAAGAAAGACAATAGTAGTAAAAGCAAAAAAGGAATTAAAG…	ARS507.6	5	66800	67200	36.95	0.27	4	AAAAAATTTTC	1	66943
AAAAAGGTCTGCTTCTATTGCTTCTCACAACGATGCCTTGTTTGCTGCTGTCAAAGGTGCACCTGAAACGATTCGTGAAAGGCTTTCTGACATTCCCAAGAATTATGACGAAATCTATAAATCCTTTACACGCTCTGGTTCAAGAGTTTTGGCTTTGGCTTCTAAGTCGTTGCCAAAAATGTCTCAGTCTAAAATTGATGATCTAAACCGTGATGATGTTGAATCTGAATTAACCTTTAATGGGTTTTTGATTTTCCATTGTCCTCTGAAGGATGACGCTATTGAAACCATTAAAATGTTAAATGAATCCTCCCATCGTTCTATTATGATTACTGGTGATAATCCATTAACTGCTGTTCATGTGGCTAAAGAAGTTGGCATAGTTTTTGGCGAAACTTT…	ARS508.5	5	92400	92400	27.46	0.23	1	AAAATGTTAAA	1	92305
AAACCGCTAACAAAGCTGACCAGCTAGCTAATGACACAGAAAATTCCATTAAGGAATTCGAAGGTAAGCTAGATAAAACTGATTCTCAAAGACTAAAAGATCAAATTTCATCCTTAAGGGAATTGGTTTCTCGGAGTCAAGCTGGAGATGAGGTTAATGATGACGATGTTGGAACAAAAATTGACAATTTGCGAACTTCATCGATGAAACTTTTTGAACAGTTATACAAGAACAGTGACAATCCTGAAACTAAGAACGGGAGAGAAAATAAATAACACAAGATAATAAAAAAGATAATATTTTCGTTTAAAATTTCAGAAATATTGCTTACATCAAACGAAATAGTAAGCGTAAACCATATATCCTTTCAACGATATGTATCATTTTTATAGTCTTTTG…	ARS508.7	5	96400	96800	27.46	0.23	3	GATAATATTTT	0	96594
GTTTATCAAAGATAATGTCATGTAGCGTGGCAAGTCGACACAGCAACGTGTGGATAATGGATGAGACGATAGCGCCACTGGTTGGTTGTTTGTAAGCTTCGATTGGTAACAGTGGGCTAAAATAGATTGTAGTTATACCCCCACGTTTGCTGGGTCTCACGATCCATATCAGACTGCCCGCGTGGGGTTAATTCTGAGGTGTTGAGCCAGCCAACTCAGACGTTTTGATGACGAAGAACAGAAGATGCAAGTCTTCTACGTATGCAATGATCTGTCCAACTCACCGAAACAAGAAAAAATTTTGCGTTTTTTTTTCCTACAAATCCCCCATTTATTCGGAAGGTGTGGGTGGAGGCGTAGTTTTTTGTTTATTTTTTCCCAATTTACGTAGTCCCGCAG…	ARS510.1	5	140800	141200	34.53	0.21	3	GAAAAAATTTT	0	141088
AAATTTACATATTGTCTCTTATTATTCTGTAAAAGATATAAAACAAAATTGTCTAGTGACTCCTAAAGCTTCTCCTTTTTTGAAAGATGTTAGACCTTCACAGGAACTAATTGTCGCGATGGGAAATACAACCTTAGGCAACGTGAAAAACAATTCCACTACCACCGGTAATGGTCCTAATAATATAAACAATAAAAGCAACTCTTCCACTCCCCTGAATACTGTTATTTCCACGAATAACAATAGTGCTAATATAAATGCTGCTGGCAGTAATCAATTTACTAGTGCAAACAAAAATTATTATTATAAAAATGATGAAAGCTCTGGATACCCAATCACTCAATTTGCTCCCGCATTACCATCAACAACTTTGATGTATACGGCGAATCCACCTTATAT…	ARS510.2	5	142400	143600	34.53	0.21	2	AAAAATTATTA	1	142732
AGAATCGACTGACGTATCGACAGATGTGACGAGCTCAAACTTTCAAAAATTAATATTGGCCTCTATGCTATCTAAAATGGTAGCATCTACCGTGACTTATCCTCACGAAATACTTCGAACTCGAATGCAACTGAAATCCGATCTTCCAAATACTGTTCAACGCCATCTCCTTCCATTGATTAAAATTACGTATAGGCAAGAGGGCTTCGCCGGCTTTTACTCTGGGTTTGCAACTAATTTGGTAAGGACAGTACCTGCTGCTGTGGTAACACTAGTATCGTTTGAATATTCTAAAAAGTATTTAACTACTTTTTTTCAATAAAGTGAAACAGAAAAATGTACATGACACAAGCTGAGGGTCGTAAAAAGCATCTTTCGCAATTGTTTCAACCTCATGAC…	ARS510.3	5	145200	145600	34.53	0.21	2	AAAAAGTATTT	1	145302
ATGAACGTACGTATCAAAAATATGGAAAGCATTGGAAGGAGAATATCTTTTACAGTCATTTTTTATCATTACCTCTCTTTCTATTTAGTCGAAAGCAGTTAATTCACGAATATCGAGTGATGAGAAAGTCTGAAAGAATATTGTGTTCAAATTTTGGAGGGAAGATTCTAGTCCCGCGAGAAGAAACTCTCCTTCTTTTCAATGTGTTAACACAATATTTTTGCGTCAAGGGTGTTAATATCCTCGCCAGTAAAACAAACGCTCTGACACTTTCCATAACATTACTTGTAAGAAAATTTATAAGTCTTTTACTGAGCGTCCGACTTTTCGATAATAACTTGTCATATACTGGCTACATCGGGGTCTACCTAGTCTTTTTTGGTGCCTTTATATACTCGC…	ARS510.4	5	147600	148000	34.53	0.21	2	AAAATTTATAA	1	147814
TTTAACCTAAATAGGATACAAACTATCGGCTTATCTTTAGACACGCTCTCGCAGAACGATGAGCTACTGACATTTTGAGTTGATATTCAACCTTTTAAGGTATCTCAGAATGAGGCTCCGGCGCCACCGCAAAGTCTACCTTTTCTTCTTTAAGCCTTGAGTTTCTTCTTTTGCGAAAACGTTGCAATGTATTAGGCAAGATTATATTAAGGAGGTATTATAAAAAGGACTCATAAGTGAAATAAATAATATTCGTAATGCTAAATGTCCTGGTCTTGCTTCGTACTCTCGAAAAACGTAATCTTGCGGTATTTAACGCTAGTTTAAGAAAGTGTTACTGTGTATTAAATGTTGGCACTCCGGAGATTTATATTAAACCAAAGGTCTTTGAGATCGTGT…	ARS510.5	5	153200	153600	34.53	0.21	1	AAAACGTAATC	1	153461
AATGGCGATGTCTTAGTCATGATCACTGGTGATCTGTTGATTGACGAAGAACAAAATCCACAGCGTTTCTCTCAAGTGTTCCATTTGATTCCTGATGGAAACTCTTACTACGTGTTTAACGATATCTTCCGTTTGAATTACTCTGCTTAAGGATTTTTTAAGTCACCACAGAAACATGTATTTTCATTTTCGAATATTGTTTAGCATAATTGAAGATGCTTAGCTAACGATGTATAAGGCGATAGCGATAAAGAAGATATATATATATATATATGTATGAAGATAGCGTTTTTAAATGTATTTCTTTAATACTGATCTTCGATCATTTTGAGCTTGTTTGGCGGGAATACCATTCTTAATATCTTCAGAGACAAGTAAATCCACTTCAATTGACTTTTC…	ARS511.4	5	171600	173200	30.83	0.14	1	TAAATGTATTT	1	172632
GCCACCGAGAGCGCCGCCTTTGCCTCTTTCTTTACCGATAGCGTCAATTTCATCTATAAAGATAATCGAGGGGGCCATAGACCTTGCTTGAGTAAACAAGTCTCTTACACGTGAAGCACCCACCCCAACGAACATTTCGACGAACTCAGAACCTGATACTGACAAGAAGGGCACGTTCGCCTCACCTGCGGTGGCCTTGGCCAAGAGAGTCTTACCGGTACCTGGGGGTCCAGAAAGAATAGCGCCTCGTGGAATCTTGGCACCCAATTTAGTGTACTTACCTGGGTTCTTCAAAAAGTGAACAAATTCCATGATTTCCTGTTTAGCTTCATCACAACCGGCAACATTTTTAAATGAAATTTTAATGTCTGTTTCCTTATTGAAGAGCTTTGCTCTGGA…	ARS511.5.2	5	190800	191200	50.55	0.14	1	AAAAAGTGAAC	1	190866
TGTAGGCACAGGTAATTTTGTAACCATAGTCAGATGTGGTGATCATGAGAGCGAATTATAATTTTATACCAGCTGGCAAGAATTGAGTAATATTTAGACCAGCATATAAAAGTAGAATAAAAAGTTATATGTACAAATTTTTTTTGACGCCAGGCATGAACAAAAACTACTATGGCTTTGGAATTTTCAAGCTCTTCGAAATCATTCCACACCCATGGATAAAAAATACTAGAATAATTGGATGAAATTCCAATATTTGGTCTTCTCTAAAAATGCCGAATGGGATGTTATCAAAAATTAAACCCTTTCTGACACAATATGCCATACCCAACACCAAAGCTAGAGTGGTTGGCATAGGCAATCCCTCAAAATATTTAGATTTACCTGTGCTAGAATCTT…	ARS512.1	5	207600	208000	45.54	0.03	4	AAAAATTAAAC	1	207764
AAGCCTTGATTTTGAAGTGAGTCAGGCTGCTGAGATGGTTGATAATCCATTTTTTGCAAGGTATTTCCTGTCATATCTGCATCGTGGATATCGCCTTCGTTGCTGTCGATACTACTCGAGCTGCTAGCATCGATATCATCATCAGAATCAAAGGTCTCCCCAGAACCATTTTCCGCATGGTTTGAATATGGAGGTATTTCATCGTCATCATCGTCGTTAAAAATTAAACTCGATTTATGTCTTAAAGGATGCTGAGGCTCTAATTCATTAGGATTATCTACGTTCATTTGAGAAAAAGTGTACGCCAGGGAAGCCTCATTAGTTGAATCGGCGCTATGTTTACCATTAATCGTAGTGTTGCTAGCTGCGTCACTGACATCTAACATGGAAGCATCCTTG…	ARS512.2	5	210000	211200	45.54	0.03	5	AAAAAGTGTAC	1	210100
TCTTTTTAGTTCATCGCTTCGGCTGAAGCTTTTCGGACAGCCCTGAACGGTACATTTGTGAGGCTTCTCGCCAGTGTGCGTTCTTCCGTGCCTTTTTTTATGTTCAAGTCTGTGGAAACCTCGTGAACAAATTTCACATCTAAAGGGTCTTTGGTCATTATCCGGAGGAAATCTATCTCGCAGGTAATTCATATATGGAATTTAAGAAAAGGATCGCCGATGTGCACCTACTAAGAGCAAAAGGAAATACTATGAAGCACACCGACTCATGGCAAGAAAGGGTCTCTGTTTTTAAACTTTATCTACTAGGATTAAGGAAAAAAAGAAGAAAAATAATGAAGCAACAAAAAAAAACTGGAACTGCTTTGCCTTCCAAGTATTACTGATTGAAGAACAGTA…	ARS512.3	5	212000	212400	45.54	0.03	3	TAAACTTTATC	1	211974
CGGTCTTAATTTATCTAGTTGAGTTTTGGGTACCCTCTCTTCTATACACTCATTCAACACTAAATTCATATGTTTATCAAATGCCATCAATTGCCCGATGTAAACGCGGCCATCTTGAGTGAGAACCCTCAGCTTATAATCAATAAGGTTGGCTAGTCGGCTGCTATGTGCCACCTGTATTTTGCTCATTAGTTATTTACTTTACTGGAAACCTGTTATACGGATGGTTCTGTTACCCCTTCTACTTTTTTCCCTGTCTTGTTCATTTCTAACTAGCATAGGCTTCTTTAAATTTCATTTTTTATTTTCATAATTTTTATTTTGAATTTTTTCCCACATTATCGTGAGAAAAACAAGAACATGGAGAAATAAGGAAGCTCGGTGGGTGGTTAATTGGGG…	ARS512.4	5	213200	213600	45.54	0.03	1	TTTCATTTTTT	0	213278
GCATTTTCTCTTAATTCTGATAACCAATGATTACAATTTTCATATGAGCTTGATTTACTGATATCGTAAACGATCAAGGCACCTACAGCTCCTCTATAATAAGCAGAAGTAATGGCTCTGTAACGTTCCTGGCCCGCAGTATCCCAAATCTGCGCCTTGATCCTCTTGCCATCAATTTCCAAAGTTCTGGTGGCAAACTCAACCCCAATTGTAGACTTTGAATCCATATTGAATTCGTTCTTCGTAAATCTTGACAATAGATTGGATTTCCCTACCCCGGAATCACCGATCAGTACAATTTTAAATAGTAGGTCGTAATCATACCCGTAGTCCTCGCTGCTCATTGTTGAAATCCCCAGACGCCGTCAGAATCCCTTTGCTGGCCTAAACAAAGTGCCT…	ARS512.5	5	214400	214800	45.54	0.03	1	GTACAATTTTA	0	214693
CCTCAATTCCTGTTGAACATTCTAACCCATGTACTTCCATTGAAATACCTAAGAGATCACCCTTACGGTTCACGTCATCTCCAAAAACATCTGATATTCCTCCTGAAGCTCAATCACCTAAAAATGGGTCCTTCCTCCAAGAAATCTCGGTACCTTCGATTCAAATTATACCAGATGAAAGTATCTCTCATACAAGAGAACCATCACCATCACTTATTGAATGCCCAGAGGATGAAAACGAAGCTTTTTCTACTGAAGTTGCTGACCATTCTATTGCAATAATTAGTGAAACAAAAAGTGTTCCATCGATAGAGCCATTCAAACCGCTATCTTCATTCAATTCATTTGGTCAAGAAATTCAAAACAAGGAACCAACTCCTTTGAACCAAACTCCTACAG…	ARS512.6	5	216800	217200	45.54	0.03	2	AAAAAGTGTTC	1	216877
AAAACAGCGGCGAGAACCTAGGGAACGCACCTCGAAGACGGGACACGAGGACGATAAGGCAACGATGGTCACTGTTAACATAGATGCCTTCCTACATGATAAGGCCCCTAAAAAAAAATCGTGCAAATACAAGAAGAAGAAAACGAGACAGTACCAGGATAGGGCGGCGGCGTCGATCGATTCGAAACCGCACGTAGCTGGTCATACGGCCTTTGCCGGTGCTTCGTTCACAACAGATATCCCACATGAGGCAGCGCTACCCAAACCTAGTTTTGTTTGAGTAGCTGTGATTGTAAATTTTTTTATTTCTACTTGAGCGGGCGGGCTCTCATTTTTTTTTTTGGGGTTTTATTTAGGTCGGATTATTCATAAAGATGGCATTTATATACATTTTTACGC…	ARS512.9	5	222800	223200	45.54	0.03	4	GTAAATTTTTT	0	223086
ATTCGTAGGATACATAGCGTCACAGTGCACACCAGTGATTGTACAAACAACATCACAAAGTTCATGTTAAAGTTGTCCAGGTTAACCACGAATTTGTTCGTTACTGTCATCAAAATCGAGGACGCGCAGTAAGATAAGATTGAAGCCGGCCCAGAGTTGGCCACTGATTCCGTCCATTCATGCTTATGCTTGCTCATAATTACCACACCTTCTTGATCTCTTTACAGCTTTTCAACCTTCCATTCTTGTACTCTATCTCTACCTGGCCCTTTAAACATTCTTAATATGATATATTCACATTTTTTGCTCTATTACCCGGCGGACAGGTTCCCGAAAGAAAGTGACATGGCAATGCTGAGAGAGTGGAAAGAGTCATCTTGCAAGACAGAGAAAGATGTT…	ARS512.11	5	229200	229600	45.54	0.03	1	ATTCACATTTT	0	229574
CACGTTAATACCGTTTAACACTAAGCGTAATTAATCTATAATATTTCAATTCCTTCTAGATAATATCCTCTGCGCCTAGGCTCACGAAATTACACGGAGGAAGCGTCGACCAGGCGACTCGTTGGTAGGGGACCAAGCGCGAGTAACTACCAGAATCGCCTTGGCTCAGTAGAAAATGACGGCCTAAAGGGAACCTAGCGGGGGAGCGTAGTCGTAAGCGGGAACAGCGAAAGTCAAGCTTCTTTTTTTTTTCACAATATATGGAAAAAAATTTATCACCCATACATACCACTAAATGTGTTATATATTTGAGAACACCTTTACATCCTAATGTTTAATGGAAAAAACAGTCCTCGAAGAGCATCGTATTTGTAGAAGGAACCAAGTAAATTAGTATAC…	ARS513.5.3	5	270400	270800	36.61	0.02	6	TAAATGTGTTA	1	270500
TGCTCAGTATCGGTTGAAACCACTAGTTTTGGCGCTTGACTCCACTCGTGAGTCATGTTTGGACTATATATGTGCCTTGAATATATATAAATATATATATTGCTATATGATCCCGCTGTTTCCAAGAGTAGTAATTACTAGACGGCTGTTGGCATATGTCAATGAGAGATTAGTGTACTCTTCGTACCATCAATCCGCCCATAATCTTCTAAGTGATCTTCCGATCGTATCCATCGAACTTTACTAAAGGCTCTTTTCGGGGTTACCCCTAAATTTTCAGTATTTGATTTGTATTAATGTTTAGCATTCAGGTAGTCGTAGTAAACGGACACATTTGACATTCAACGACGGTACACACGGTAGGAGACGTCAATTTCGGCTGAGATGAGTAGGGCTAGC…	ARS513.5.4	5	271600	272000	36.61	0.02	1	ATTAATGTTTA	0	271672
ATGGATTTTTCACCGTACTTGACCGGAATTTCAGCTTCTAATTTGTTAACATACTCTTCATTGGCAAAGTCTGGAGCGAACTTAGCAATGGCATCAAACGTTCTCCAACCATGCGAGACTTGGATAACGTGTTCAGCATCGAAATAAGGTTTGTCCTTACCGAAATCCCTCCAGAATGCAGCAATGGCTGGTTGAGAGATGATAATGGTACCGTCGACGTCGAACAAAGCGGCGTTAACTTTCAAAGATAGAGGTTTAGTAGTCAATCCCATTCCGAATATTGTTTTTATTGTTTTATGTTTTTCCACTGATCTGGTAAACACTAGCTGGTTGGCGCTATTAATATGAAAAGAGTTAGACCAAATTGAGTAGAAAAGAAACCTTTGGCAATCCTAACTA…	ARS513.7.1	5	280400	280800	39.16	0.09	1	TTTTATGTTTT	0	280699
ACCCCAAAGGACAGGGCCAAATACGTACGCTACGGTAATATCTAATGGGAGAGGGTATAACATTGACCATTTTCGAAGGAGGCATAGGAATTTAGACGCTGATGGATGTTATCAATATTGAAGTTTTTCACCGTTTCCCTCTTTCTCTGCTCCTTTAAAGAACGCAAAGTCTCCTCTTGAGAGAAAGCAGACGATTGGAATTGGTATCTTTCACGTAGCATTGCTTAACCTACGGCCATATTAATGATATGAAGTCATATGAAAATGGCCGAGGCCAGCGGTTCATTCGAGGATATATATTTTATTACCCGGCGTCTCTAGCCGAAGTAAGAAAACACAATGCAACCAGCGTTGGTGGAAGGGCGTGATAATGCTGAATGGGAGAAGAAAGTTGAATAG…	ARS513.7.2	5	281200	283200	39.16	0.09	3	ATATATATTTT	0	281478
CGTGCGCATACGGTGCCGATGGATCACGAAGAAGAGATGCGTTCTTCTTAAGTAAAGAGCGAACTTGAGTTGGTACAGGTGGAAGAGTGCGGCCATTCGGATAAGGTAACAATTTTTGTGATGTTATAGTATTAAGAGAAGGAAGAGCGTGCTCAGCAGGTTCTTCCTTCACGCTGGCTTCTTCGTCAGAGCTTGATGCATTGGAAGCTGAACAAGACCCCATATTACTTGAGCTGGGGGGAGACAAAGGAATTTTTTGAACTTTACCACGGGCTATTTTCTTCTTAGAGTCTAATAATTTTTTCTTGGAACGTTTCCTGTTTCTTCTCACCGATTGAACAGCAGCGGTAACCAACTTTTCAAATTCTGCCGAAAACGTATCAGGGTACTCAAATTCAC…	ARS514.0	5	283600	284000	41.91	0.11	3	TAATAATTTTT	0	283877
TATTTTCCATGGTGCCTTTTGCCTCGCGTACACTCACGGCACTAATGGGCGATACGATACTATGATTGTGTTCGGGATTAGTTCGATTCAATCATTCGCGCACGAGGCATGGACAGAAATGGCACTGATTTTAGTCACCGAGTCAACAAAAATGAGGCGACTCGATCAAAGATGTTTATTGACTCGTTTTTGCAACTAGAGAAAGGCATTCTTGCACGGAGAGAATGTTGACTTTAGTTGGAGTACCATTAGAGAGATGCCATTAGAGAACATTGTACTGCAGTAACGATGAGTTTAAGTTTTTAAGTACGCATGTTTATATATGAAAAAAATATACATTGAGATTACGAATATATATACTTGTCAGGAAATGCCGGCAGTTCTAATGGTTAATCCTTG…	ARS514.1	5	284800	285200	41.91	0.11	2	GTTTAAGTTTT	0	285128
TTTATGTTTTGTTCCCAGCGGGCATCTTTCAATAAAATGAACTCAAGAAGAAGTAAATAATAACAAGCTATAATGGGTGGCCATTTGTGATCAAATTTGGAGTGAAACACGTATGATTATGTTTGAACTCTCTTTCTTTGATACGAAACCTCAAGCGACGTAGGTGATGGATATATTCACAAGATAACAAAGGCCGTGTTACAACATTAGATATGTAAACAACGTGCTAGAAGTTCTCCTCGAAGATCTCGAAATCTACAAAAGGGAATCGATATTTTATACATAATCCTATTATTATTTTTTCTTCCATTTTATATGCTCACTCATTATCCTTTACATTTCCAAAATCATGCATTTCAGCTTCCATTAAATTTTGATGGCTGTCTCTTAATTTTGTTA…	ARS514.3	5	287600	288000	41.91	0.11	2	TATTATTTTTT	0	287859
AATTATCAAAAACCATCAACATACCAGCCAACATCAGTGTAGGTGGAATAAAACTTTCTTACCATGTACAGTAAATGGACCATGACGCCGTGCACAAGCTTATGCATAATGAGCTAAGCGGGAAGACATTTTCAAACTACGTGATAGTTCCGACTGCCCTTTCAATTGCTAATGTAGCAATATGTTAGGAATGCAATATTCCAAAATGCTGTCTGTGTCAGTGAGAATAACAAAAACATTGAATAAACTTTTCTATGGTAATAACCACGCCAGATAAGGGCGTTGCCATCGTTTTCATTTTTTTTTTTTTTTCAAATGGTGGGGTCACCGTTGTGAAAAGAAACCTTTGATTCTCAACCATATCGGTACTCGGACTAATCACTTAAATCTTTCCAAGGG…	ARS514.4	5	288800	289200	41.91	0.11	1	TTTCATTTTTT	0	289236
TGCTGATAATGTTTGGAACGTTAGTTTTAAGGACAACACACTTGTGGCAGCGGTAGAACGAGACAAGCGAAATCTTTTAGAAATTTTGGACTTTAGTTGAAGATTGATGTGAGAATGATGCAGAACTTACCTTGTCACGTTTGGAACTCAGTTGTACTTTTTCGGTGTAAACAAATATAAAACTTTAGAATTTACATTAATAAGTTATGTGCTATTTATTAGTTTAATATATCAACATTAATTACATGCGAGCTATGTATTATTAGCTCAATCAGCAGGACTAAAATCGAGGAAAAAGTAATTTTGTTTATGCCCAGTTCAGTTATCGTCCATTTGTAGCAAATGTGGTACAAGTTGACCCATATTTTCATGCATTGGGCCATGCAGTAATTATCACAC…	ARS514.5	5	290800	292000	41.91	0.11	2	AAAAAGTAATT	1	290988
AATGTTGCATTCATGCCCCATGTTGGGCAGTGGTTTCAAGGTATCTCTTTGACCGTCTCTATTCCAATAAAAAAAGGTTCCTTGTCTATTGATGAGATCAGGAAATTATACAGAAATTTTTACGAAGACGAAAAGCTAGTACATGTCATCGATGATATCCCACTGGTTAAAGATATTGAGGGCACCCATGGTGTAGTTATTGGTGGTTTCAAGCTGAATGATGCTGAAGATCGTGTAGTTGTTTGCGCAACCATCGATAACTTACTTAAAGGCGCCGCTACTCAATGTCTGCAAAATATTAATCTTGCTATGGGTTATGGAGAGTATGCTGGTATCCCTGAAAATAAAATTATTGGTGTCTGATCACTGTGTATAGTAGATCTGCAGCTCAGTCACATG…	ARS514.5.1	5	297600	298000	32.73	0.03	3	AAAATATTAAT	1	297927
GTCGAAGATCTTTATAGATACGTCAATGCTGCTACTGGTAAGCCCGCTCCCATGATCTCTGATGATGTCTACAATATTGTCATGGAAAACAAGGATAAATTGAACTCCGCAATTGTCTATGACAGAGATTTTCAGTACAGTTATTTTGGTTTTAAAACTTTGGAACGTTCTTATTTACTAAGAATCAACGGTCAAGTGGCCGAACGTCCACAACATTTAATTATGAGAGTCGCACTAGGCATCCACGGTAGAGATATCGAGGCTGCTTTAGAAACGTATAACTTGATGTCTCTAAAATATTTTACTCACGCCTCTCCAACGTTGTTCAATGCCGGTACTCCAAAACCTCAAATGTCCTCTTGTTTCTTGGTTGCCATGAAGGAGGACTCTATCGAGGGG…	ARS514.5.2	5	299200	299600	32.73	0.03	2	TAAAATATTTT	0	299529
AAGGTAGAAGTTCCTGAAGTACCTGCCCCAACTAAGAATGAAGAAAAAGCTGCCCCCATCGTTGATGATGAGGAAACCGAGTTCGACATTTACAACTCTAAGGTTATAGCATGTGCTATTGATAACCCAGAAGCTTGTGAAATGTGTTCGGGTTAATGAGGGCTAAGTTTTTATTTCTTCAATTCTATTTATCAAAATTTGGGTGTTTACTTCGAGGTGTAATTTATATTTTCTTTTGTTTTCTCTGATAAAAAAATTGGTTTCCATTCTAATGCCAAGCTAAAAGGTACCTATATATGTTTACTAATTATTTTTCTACTTTGCATATATACATAAAAAAAGTCGAATAATTTAACATGAACATTTTAAGCTGTCCTTGTAAGAAGGCCATGATACAGA…	ARS514.5.3	5	301600	302000	32.73	0.03	2	ATATATGTTTA	0	301749
CTATCCGTTGGCTTTTCTAAAATCATGACCGAATTAGGTTCATTCCAACCACTAAGATAAAACAGGTCATTTTCCTGTTGGAACGGATAAAATACTGCTCCAGATGCAAATTGGATATCGTTACCAGCTAAAATCACACAACTTTTGGGAGGCAATGTTTCCGCCAACCTAATTCTTCTTTCATAGTATTCCAAGGCTGAAATGCCTGGTGTCAACTCGCCCGACTTTATAAGGAACGGCCTTGTCTCATGCAGTGGTTGGCCTGCCTCAATGGGGATTCTGACTCTATTAGTAAAAGTATTACTTTTATGCTGTTCCAATGGCGATACCAACTTCGAGAAGTATCTTTGGCAAGATTGCATAGAAAACCGTACTGGGTTTATCCTATGTAACATATCA…	ARS514.5.7	5	317600	318800	32.73	0.03	6	TAAAAGTATTA	1	318234
AATTACCCACTCTCCGACCATTCCCCCTCCCTAAACTCTATGGATAATACTACAAAGCATAGCAGCAATGTGCACACTTGAATCACGTGAACCACAGTAACCTAATTGCTCAAATTTTGAGAGTTAAAGGAAAGAATAAAATATATAAATGATACGTTTATACCCGCTAAAAAAAAAAAATATAAAACAAAAAAAGGATCTCATAAGACGATTTGTTGGGATATGTCCACATCTTTCGGCTATATACTACATTTAGCTGTTTCCCGTTTCTTTGTATTATTCCCTTCTTATGTATAACTTTTACTAGTAATAATTATAATAAATATTCGTTTTGAAACATGGTAATTTCAAATGTTCAATGTATTTTCGGGCCGATTGCTGACCAGCGACACTTTAAGC…	ARS514.5.8	5	319600	320800	32.73	0.03	5	TATAACTTTTA	0	319758
TTACTTATTGATGAATCACTATTGCAATTGAAGGAAGTTTGGGACATCTTTGCCCAGAATGAGTTAGTGAATCAGAAAAAGTTTCCTCTAAACTATAGTAAAGAAGATATTGAAAGACATGTTGAGGATTTGCAAAAATTACACGAAAAGCTAATCTCTACACCATTTGCTGCCACTCAAGGGTGGATTCCTCAAGATATGTTTGATCAACTATTAAATTCCGGCAGTATTGTTAAGCAAGAGAACGGAGACTACACCGTGAAGCAACCTGAAGCTACCAAATAATCTATACTAAAAATGAAATATTTTTTTGTTTTCTTTACCTCATTCAACTGTATAGAACGTTATAACAAAATAATCAAGTTAAAACCCTTTTTTGTACACAATGGAATCTCTTCC…	ARS514.5.9	5	321600	322000	32.73	0.03	4	TAAAAATGAAA	1	321848
CTGAAACTAATACGGTGCTGTCCCGGCTTGCGCCTCTGAGACTTACTGGAAGGAAGCCCACGGTTTCTTTTCAGTTGGATGGAGAGTTATAATCAAGAAGTATATAGATTTTGAATATTGATTAAGCGAGTAATATTGCTATTTCGAAATAATCGAGAAATCACGATAATAATACAGCAAAAATGTCAGGTAACGGTGCTCAAGGTACAAAATTCAGAATTTCTGTATGTTAAAACCGAAACAAGTGGAAATACCCATTTAAATCACACAAGATGTCGTCAATCAACAAATAAAAAAGTATATTCCCGAGACTGAATGTTACAATTGAGACAAGCAATGTTCAAGAAATGTGGGAGTCTATCAATGAATATAGTGGATAGCCAAAATGGAAGATGCCAA…	ARS517.0	5	396800	397200	39.62	0.06	2	AAAAAGTATAT	1	396873
GTGCCTGCTGTGGTAAACGAAAAGGAGGTCCCTGCTGAACCGGAAACTCAACCTCCCGTCCAAGTAAAGAAAGAAGAGGTCCCACCTGTCGTTCAGAAAACCGTTCCTCATGAAAATGAGAAGCAAACGTCCAACAGCACTCCGGCCCCACAGAACCAGATAAAGGAAGCCGCAACCGTACCTGCAGAAAATGAATCATCCAGCATGGGTATATTCATATTGGTTGCACTCCTTATCTTGGTTTTAGGATGGTTCTACAGATAATAGGGAGATTGAGGATATAGCTGTATTCTAAATATATATTTATATATGTGTGTGTTTTGCCCTTTCCTTCCTTTCAGTCTTTATTTTACTTTGTTTTTCTACAATCTTTTTTTATTGTTTCCTTCTGTAGCCTTT…	ARS517.2	5	400800	402000	39.62	0.06	4	TAAATATATAT	1	401892
AGTCGCAATTAAATTCGAACCGCGACATTCGGACGCACCCCAGTTGCGTGACGAATTTAGAGCCTATAGGATATTGAATGGCTGCGTTGGAATTCCCCATGCTTATTATTTTGGTCAAGAAGGTATGCACAACATCTTGATTATCGATTTACTAGGGCCATCATTGGAAGATCTCTTTGAGTGGTGTGGTAGAAAATTTTCAGTGAAAACAACCTGTATGGTTGCCAAGCAAATGATTGATAGAGTTAGAGCAATTCATGATCACGACTTAATCTATCGCGATATTAAACCCGATAACTTTTTAATTTCTCAATATCAAAGAATTTCACCTGAAGGAAAAGTCATTAAATCATGTGCCTCCTCTTCTAATAATGATCCCAATTTAATATACATGGTTGA…	ARS517.3	5	405200	405600	39.62	0.06	1	GATAACTTTTT	0	405266
GAAGAACAATCCCAATTACCAGAATTTGAGAACATATCATCAGATGTTTCTGTCATACTATGGTCACTCTCATTGGATAATGATAACATAGAAGAATCAGATATTCCACTCTTCCCAGTACCATTACCATCGATTATTTTACCGGTATCGACATTGAATTGAACTTGACAAATTTGATGTAATCCCAGTTCACAAAAATTGTCAAGAGTTACTAAACTTCCATCGTTTGCCATATCAAGGAATAAAAATCCACATCCTTTTCCATTGGCCTTAGTGTCATTGCTCTTCAAGCAAATATTTTTATCACTCATACCACTCACAATAATGTTTCCACATTGGAAGACTTGCTTGGTTAATAGTAGTTCACTTTCACTATCTAGGCTAATTGAGTTAAATCCA…	ARS517.4	5	407600	408000	39.62	0.06	3	AAATATTTTTA	0	407752
ACTCACTTTCATCAACACCGTACAGTTTCCAATAATCTGATTTTAATTTTTTAGTTGTATAATAGTCATTGAAGTTGTCTGATGCTTTTCGCAAAATCGGTGAATTCATTTTCGAAGTATTGTTTTGCCACGTTTTTTTGTATGTGGATAAAGTCATCATCGATTGTAAAATCCTCTTTTTATCTGATCTCTTCTTTATATTAATAGCAGGCTGACGAAAAATATTTGTTGGTTCGTAGTATTTGGTATCTTGCATAATATTAATACGTGTCACTCTCACTATCACACCTACAATCAAATTTTTTAGCAAACACAGATTAAAATTTGGAAGTCATGCAAGAAGAAGAAGCCAAAAGATAGTTTGAGGAAAGCTTGGGAGAGATATTTCTACCTTTTTAT…	ARS517.5	5	408800	409200	39.62	0.06	5	AATCAAATTTT	0	409094
GTTTTTTCCACAGTTTTGGACTTGTTACTATAATTCGTGAAGCACATTTTGCAAGTGAGTCAAAATTTCAGTTCAGTCCTTCTTTAGAAGAGTGAGTGCGTAGCAAATAAAACAGCAGGAAATAATTGCTTGTTTTTGTGTGTAAGTACCTTTTAGTTGGAACTACCGAATATAGTGTTATTCGACTTTCACTTTCATAAGCCACAGCTTTTTCTTAGTGCGTTTTTAGTTCGATAAATTTACCAAAAACTATTTTCCCCTTTTCTTATTCCCTTTTCTTTGTTAGCTTGGGTATTATATTTAAAGTAACAGAAAGGAAAGAAAAAAGAAAAAAAATGCCTTCATCCATATCCGTCAAGTTAGTGGCTGCAGAGTCATTATATAAGAGGGACGTATTCC…	ARS517.6	5	410000	411200	39.62	0.06	2	TATTATATTTA	0	410140
GCACCTTTACCGCTAGCCCAAGAGGGCACTACAAAATCTAGAGTTGTACTTCAAACGTACATGTAATCACCTTGTATATACTCGAAAGAAAACATCAAGTTTCTGTATAAATATGAGTGAAAGCATAATCATACATTATCTTTTCAAAGATGAAGAGTGGGTGAATTTTGAGATAATTGTTGGGATTCCATTTTTAATAAGGCAATAATATTAGGTATGTAGAAAGTACTAGAAGTTCTCCTCGAGGATTTAGGAATCCATAAAAGGGAATCTGCAATTCTACACAATTCTATAAATATTATTATCATCATTTTATATGTTAATATTCATTGATCCTATTACATTATCAATCCTTGCGTTTCAGCTTCCACTAATTTAGATGACTATTTCTCATCATTT…	ARS518.1	5	431200	431600	40.53	0.06	2	TAAATATTATT	1	431626
TCCCGACGTTGGCTTATTATGTGACTTATTGTGGTCAGATCCAGATAAAGATATCGTAGGTTGGAGTGAAAATGATAGAGGTGTTTCTTTCACTTTTGGTCCTGATGTAGTGAACAGATTTTTACAGAAACAAGATATGGAGTTGATTTGCAGGGCCCATCAAGTTGTGGAAGATGGTTATGAATTCTTTAGTAAAAGACAATTGGTGACACTTTTCAGTGCTCCGAATTATTGTGGTGAATTTGATAACGCTGGTGCAATGATGAGTGTTGATGAAAGTTTATTATGTTCTTTTCAAATTTTAAAGCCAGCCCAAAAAAGTCTACCAAGGCAAGCTGGGGGTAGAAAGAAAAAATAAATAGATTCACGTCCTAAATCAAAGTTTAAAAAGGAAAATAC…	ARS518.2	5	433600	434000	40.53	0.06	3	TTTCAAATTTT	0	433887
AGTTGGGTTTTATTTAACAAATAGGTTCCCGAGAAAAAGTTCTAATATTTTCTATTTACCCAATAGTACTACCCCATCAAATAATAGAATCATAGTAATTATCAGTAACAAAATATACAGCCCTCATCAGCAATGTAGTCTCAACAACTGCCCCCAGAATTCACCGCTTTTCTTCGATCGTCAATATGGAAGTGAGGAAACTCGGGCTCACTTAAAACGAACTGCATGTTTTAAAATCATTATCCATGCAAGTGTGGCATAAAAGCCGTAGTTAGATATATCTCAAACGCGCAAAAAGTTAAAAAGAAAGCCCTGTAGGGGGCTCGAACCCCTAACCTTATGATTAAGAGTCATACGCGCTACCGATTGCGCCAACAAGGCTCTTATTGTTGTTTTTCT…	ARS518.3	5	435600	436000	40.53	0.06	2	AAAAAGTTAAA	1	435730
TGGTTAACGTAGTTAAACTACTCTGTTAAAAATAATGGGTTAAGGTTCATGTTCGTCACATAATGTTTCGTACACTTAAAATTCAAACGCTATCAGTAGCATTACAACGTGTATGAAGATCATTGGAGAAAAGCAGATGGTTAAGAGCTTCTTGCACTGAAATTTGAAAATATTTGTCTGAACTTAGTAGTGAAAAGTGGTGAATGAACCAGGTTTTTATACATAGATATATGGTTAAGTTATGAAAACTCTTTTTGGAAGAACAAATTAGTACAAAGGCTGAGGCGGATTGGTTAAAGTTTTTAAATTAAAAGTGAGCTTCTATTTTGATAAATCACAAATATATAATTTTTAACAGTGATGTATCATCTTCCCATAAATGTAATGACTTCTTCTTAT…	ARS518.4	5	436800	437200	40.53	0.06	4	GTTAAAGTTTT	0	437117
ACTCAATCCCTTAGTATTCTTTGTAAACAATACACTTTAAAGAAATATGAATGCTTATCTGCTTTTCAACAATCATTTTAGAGTTCTTATTCACTGAGGTGCGAATGGGTACGAAATTTGTTTCAGGAGAATTTAGCTTGTTGCACACAAATTTCTGCCATTTATATCTGCAAGATCTGTTTCCCTCTTTCCAACTAGCGAGGCATATTAGAAAAAGAGTGAATAGTAACTTGTGTAAGTTTTGATGTAACGGTAGTATAGAGTACCTATAATATTCGCCGATTATATTCTCAAAACTTGTAAATAACGCCATGTCACCGTATGGAGAAAGTGCTAACCAAATTGTAATATCGACCAAGACCTTTTTCTGTGAATTATGTAAGTTTCTTAAAGTCCATG…	ARS518.5	5	438000	438400	40.53	0.06	1	AAAACTTGTAA	1	438228
CATAGTCTTTTTTCAAGGAAGGATATTTTTCAAAGCAGGACTGCAATTAGTCTTTTCCTTTTCTTTACTCCCCTTCCATCATAACTGTTAGTGAATAACCACTTATATAGCATAACACAATGGATCAAGAAACAATAGACACTGACTACGACGTGATTGTCTTAGGTACCGGTATTACCGAATGTATCTTATCTGGTTTACTCTCTGTAGATGGAAAAAAGGTATTACATATTGACAAGCAAGACCATTATGGTGGCGAAGCTGCTTCTGTGACCTTATCTCAATTGTATGAAAAATTTAAACAAAATCCGATCAGTAAAGAGGAACGGGAGTCCAAGTTTGGTAAAGATAGAGATTGGAATGTCGACTTAATTCCTAAATTCCTGATGGCCAATGGTG…	ARS518.6	5	439600	440000	40.53	0.06	2	AAAATTTAAAC	1	439783
ATGATGACTACTTACAACAACCTGCTAGGCCATCGTTTGAGAGGATTTTGTTATATTGCCAAAGTGTTGCCCGTTACGGTAAATCACCTTATTTGTATCCTATGTATGGGTTAGGCGAACTTCCACAAGGATTTGCTCGTTTGTCGGCTATTTACGGTGGTACTTACATGCTAGACACTCCAATTGATGAAGTATTGTATAAAAAAGACACAGGAAAATTTGAAGGGGTCAAGACTAAGCTGGGAACTTTCAAGGCCCCATTGGTTATTGCTGATCCAACTTATTTTCCCGAAAAATGTAAATCTACTGGTCAAAGAGTTATTAGAGCCATCTGTATTCTTAACCATCCAGTTCCGAACACCAGTAACGCGGATTCTTTACAAATTATTATCCCACAAA…	ARS518.7	5	440000	440800	40.53	0.06	2	AAAATGTAAAT	1	440506
AATCGATCTTTGCGGGCAGCCCGTTGGCAGGAGGCGTGAGGAATCCGTCTCTCTGTCTGGTGCGGCAAGGTAGTTCTGGGTCCTTAGGGGCTCCACCTTCACCGCTGTTAGGGGAGTTTTATCCAGCGTCAGCAAAGGTGACCCGTGATGGAGGCGGCCGGGATAGCACATATCAGTCGGATAATTGTGCAAGTTGATCGCTTCGGCGGTTTAATTTGGCGGTGCCATCAGGATTTACTCGCACATTGTGGCCGTTCCCTCGGGGATGGAGTGTGTCCTGAACCATATTTTTTAACATTTTTTTGAACTAATTAACCGTCCCAATGAGGGATGTTGGAAGAGTAAGTTGATTTAATGTCCTATTCTTGTTCTTTTCGAATATAAATGACGATTGGAAGG…	ARS519.0	5	442400	442800	0	0.68	2	TAACATTTTTT	0	442503
ACTCCTTCCTCCGTTGCTGCAAGAATCCTCGAGCTAGCCCTTCGTCCGCTTCCTTTGGCACTTGAAAGAAAAAATTAGCTTTTCTTTTTCCTCCTTTCTTTTTGTCTTTCTGGTGTAGGCACAGTTGGAAGGATGGGACACCTAAAAATCTTATTTAAGAAGTCACAGACGGTAACGCAGCGCCTCGTTTCTAAATCGTATAGCAGGCTGAGCGCCCGCACACCCACCTGCGGGAGTTACTCCGGGGATCGTATGGGGTGATGCATGCTCTTTCGTAAACCTTAAGAATAGCGTTAATTTTTTCCTAAATAGGAATACACATACTCATGCTATGTAACTGTAGAGAAAGGTACAGATTACATGAGGCGCCGGTTGTCGTTGATACATATGTGATTACGT…	ARS520.0	5	491200	491600	32.66	0.08	2	GTTAATTTTTT	0	491294
ACTTCACACCAAAAAATCGGATACTTGACCATATCTTTGTACGCATTGTTTCCATTCAAAGAAGTGTCAATCTTCATATTGGTAAAATCTGGCGGTTGACATGACATGATAAGTCGTGCGTTAACATTACAAGCCCTGAGCATCGCAACGAAACCTTGCACTGAAATATCAGGATCTCCGTGACCTTTACTGACGGCCCTTAAAAAGTCAGATCTTTTCAACGTCTTGAATTTTCTTTTGTTATTGGCGCTCATTTCAATTTCTTTCCAGGTTCTCATATAAAGTCCCTCATTATCATATTTTTTAGTGATCTTCCAGTGTTTTTGCCATAACTCCATGCATTTCTTCAACCCATCTAATAATTTCCTAGTACTCCTAAGTGGGAGTTCCTCATCTTTC…	ARS520.3	5	502000	502400	32.66	0.08	1	TATCATATTTT	0	502224
CAATATTTTGAAAATGAAACACGCTAAAGTTGAAAACTTAATTATCAACCGTCCAGAAGGTGTAGGCAATTTCATCTAAGAGAATAAATTTAACATCCCACGATCCTTATCACATCCCATCCCTACACTAGGACATATGTTCCCAAACATTACAAAGTTCTTTCCTGATATCATTACTGATATAAGATTATGTCAATTATTGATACCATTAAAGACATGTAATATGCAACACTTGTCGAACAGATCATAGTTCAGTAGTCGATTATCATACTGTTACCCTCTCGTTATATAATTTTACTTTTTTTCCTTTCCTTCTTTTCAATTTCGAAACTGTACCACGAGAAACATTGTGTAGAAGAATCTTGTCCTCATTATATCTGGTTAGTACTATCGTATTCT…	ARS520.5	5	504800	505200	32.66	0.08	3	TTTTACTTTTT	0	504953
AAAATCCACTGTTTATGTATTGATTGCGCAATGCAGAGATAGATAGATATAGATAGATAATGGACGTAGTTATAGAACAGAAAATCGGTAGATCGAAAACACAGGGGAAAAAGGGGGGGGGGGGGGGGAGACAGCGCAGCCACGTGACGGGCTTCCTCTTTGGAAAGTGGAGCGAAGTTTTGCGGAAGCTACTTTATTCCGGCCTGGAGTCAAAAGAGGAAGCTCGGTGGCAAATAGCTTCCTCTTTGTGGCCGGGGCGCGGGGGGACGAGGCAAAAAGCAAAGAAAAGCAAAAAAAATAAAAAAAAAAACAAAAAAACAGGGGTATGAGAAAAAGACACGCTTTTCCACGCGCAGCAAAAAGGAAAAAGGAAAAGGAAACTCTTTATTATTGGACCTT…	ARS522.1	5	544400	545600	44.44	0.05	1	AAAAAATAAAA	1	545360
AGGACATCGAGGGCTCGGACACAGTGCAAATTGAGTTGCCTGAATCTTCCTTCGAGTCGTATATGCTAGAGCCTCCAGACTTGTCTTATGAGACTTCGAAAGCCACCTTGTTACAGATGTATAAAGATATGGTCATCATCAGAAGAATGGAGATGGCTTGTGACGCCTTGTACAAGGCCAAGAAAATCAGAGGTTTTTGCCATCTATCTGTTGGTCAGGAGGCCATTGCTGTCGGTATCGAGAATGCCATCACAAAATTGGATTCCATCATCACATCTTACAGATGTCACGGTTTCACTTTTATGAGAGGTGCCTCAGTGAAAGCCGTTCTGGCTGAATTGATGGGTAGAAGAGCCGGTGTCTCTTATGGTAAGGGTGGTTCCATGCACCTTTACGCTC…	ARS522.2	5	546400	547600	44.44	0.05	2	TTTCACTTTTA	0	547235
ATCAACATCTTTTCAAATTGAATAGATTGGCAGAGGAATTTAATGTTGCAGTATTTCTGACAAACCAAGTTCAATCAGACCCAGGTGCTTCTGCATTATTTGCCTCGGCAGATGGTAGGAAACCAATTGGAGGGCACGTTCTGGCACATGCGTCAGCAACAAGGATTTTGTTGAGAAAAGGGCGTGGTGACGAAAGAGTTGCCAAGTTACAAGATTCCCCAGATATGCCTGAAAAAGAATGTGTCTACGTAATTGGTGAAAAAGGTATTACCGATTCAAGTGACTAGTTTTTGTATACTTTTTTAATGAAGATGACATTGCTCCTTTATTAAACTTTTCTTTTACTTTGTGTTACTAATATTATTAATATCTTGTTATGATTCTTTGTTTTAGCAGCTC…	ARS522.3	5	549200	550400	44.44	0.05	3	GTATACTTTTT	0	549516
TTTTCTTGCTTTAGTTGCTCACACACCTCTTGCTGCTCTAAGGTTTTATTCCACAACAAGTCTAATGTATCCTTCAGAAGTTTGGTTTGGCGCATCATCCTCTCATTTTTTGTTCCAGCTTCTCTTTCGCCAAGATTAACTTCAGAGGATGGCTGCTTGCCCGTCGGCGAGCCAGTACTAATGTTCTCCGCTGACATTGTCCTATTTGTTTGTTTGCTATTATAATTTATCTAGTCAACAACTTCGCAGATCTACAAACTGGTCCTTAAGATGTTTTATTGAAGACATCATTTTTTATTTTTTTAAGCAGAACGTGCTGTGCTCTCCCTTTTGGGCCTTTTTACGATTTTCAAAAAAATTGGTCTCTAGCGGGATCGAACCGCTGATCCCCGCGTTATT…	ARS522.4	5	551200	551600	44.44	0.05	1	TTTTATTTTTT	0	551211
CAATCTGTTCTTTTATTAGTCGCTCCAGCACTAATAGCTGCGACGATTTATATGATTTTTGGAAGGTTATTACATGTTATGAGGTGCCAATCTTTAATTTTGATTTCTGCACGCTTTGGTACGACTTTCTTTGTTGTGGGAGATGTGTTTAGTTTCTTTTTACAAGCTGCAGGTGGCGGACTAATGTCTAAGGCAGGATCAACGAAGACTGGTTCAGGACTCATAACTGCGGGTCTTTTTGTACAGGTAATTTTTTTTGGATTTTTCATTATCAATGAGATAAGATTCACAGTAAATGTTAAAAGGAGATGCTTATTTTACGAAGATATTTCCAGAAAGTGGATCTTTGTGAATGCTACCCTATTATTAAGCAGTATGTTGATCCTACTACGTTCAATT…	ARS522.6	5	559600	560000	44.44	0.05	1	TAAATGTTAAA	1	560078
TGGCTTAAAATAGGAGAATTCATCCTCTTAGTTATTTTCTTGGTGGACCACGTGCCTTGCTTAAAGCAGGGCGCTGCCGTTGTTGCAACAGCATTTTCAGACTTTCCTTTAGGTAAAAAAGGTCAACCAATAATTTTATTTTATTTCTGATGATGGTTGCGCGTTCCAAGAAAATCAAAACCTTGGGCCTCATCCTCTTCTAAGACGTATAATGCAATCAAGAAACCCTTCCCAAAACCTAATAAAGGCTTGTTATTAGTTTCAAATTCAGGCAGAACTCGACTTGGATCTTTTAAACTTTTAAAGTCGTAGAAAATAGGTGCATAATTAGCTAAAACAGAAGAGACTCACCATTTGAATTATATAACTTTATTAATTCGAGTAAAACATCCATCAGGT…	ARS523.0	5	562800	563200	67.49	0.1	3	TTAAACTTTTA	0	563015
CTGCTGAGGACACGAAAAACGGTGAGCCACTTGATTACGATGACATACCTGGTGACGGTGCAGGCACGGGTTCGGCATTCAAGTCTGAGATATATTTTAACACTTACGGTGGTATAGATAATTATTGTAATGACGAGCATATCGGTGCTCAGAACACTGGAGATGGTCGATAAAGCTTTACGCCTGTCGCTGAATTGACTGACCCGAAATTAAGAACTGTTGACGTAGTGAATTACGATCTAGTTTATATGTCATAATGTAGTAAGTTTATTGGACCCTTCTATATGTTATGTAAATGTAATAATTACATAGTTACTGCTTTTGTACATAGAAACTATAGTTTCTTAAGTACTACCGGATTAGAGGTTTGCTACTATATGTTTTCCTTGTCTCAAGCAT…	ARS523.1	5	566400	566800	67.49	0.1	1	TAAATGTAATA	1	566768
CTAACCACTCAATTTATATACACTTATGCCAATATTACAAAAAAATCACCACTAAAATCACCTAAACATAAAAATATTCTATCCTTCAACAATAATACATAAACACACTCAATTGCGTATCAATACCACCATGAGGTCATTAACTTAAATGTTCCTTAATACCGTCATACCACTATGCTCTATTCCATATATTGTAATATAACTGTACTCTATAGTCATACAGACGCTTTTACTTCACCCTATCTTCTCATACTATTGTCATAGAATCGCACACTGACGCATGATTAAAACGAATAATTTTTACTATAAGGCCTCCCATCCGTGCTCTATCCTTTTGTTTGAAACATTTATATACAGAATCTCAAAGCAAGCGGGAGAAGTAGTAATTACCCAGAGGTC…	ARS600.1.0	6	5600	6000	0	0.06	3	AATAATTTTTA	0	5710
CCGCCCAAGCTGCTTATGATGGTGCCGAAAAGACAAGGAAGATGGATGCCCTTGTTGGGCGTGCTTCTTACGTGGCTAAGGAGGAGCTGAGAAAACTCGACAGCGAAGGTGGATTACCAGATCCAGGAGCAGTTGGTCTTGCTGCACTACTCGATGGATTTGTTACAGCTGCTGGGTACTAGAATTGCTCGTACACACTAGAAGCCAAACATAACAGCTTTAAAGGCTTTCATTTTTGAACTTTTTAAAAAATTGAATACTCCAACTGAAGGTGAACTAGTTGTGTCTCTGAATATATTTTTATAGATATACGAATTGATGAAGTACCGCAAATTAAGCTAAAAAGTAATGCTTCTTGCAGCTTTTAATTGTTCTTTCTGCAATCTACAATTACTTTTC…	ARS600.4.3	6	25200	25600	52.59	0.13	3	ATATATTTTTA	0	25307
GACAAAGTGTCAGTGTGCGCTTATCACGCTTCCTCTTTCTAATCCGCTTGAATCGACAGATGGTTCTAAAGAAGATGTAGATGCGCTTCCTTAAGTAAACACATTGCTACTTGCATTTTACCTTTCAAGATGTAGTGATTACGGACAGTTGAAGAGGCTAATAGCATCTATTTCTTCTTTAGTATATGGTTCCTGCAGGGCAAACAATTATTTCCTTTGCAATTTTGCGGCAGTGGGGAAGAATGATAGCACTAATAGTGAACTTGTGGACAATTATGCTATTATAGCAAGAAAAAAAATTTATTTTTTTTTCAAGGGGGGTGATTGTGATGTGAATTAAATCAAGGATATACGCTTTTATCGTCATGATAGTCGTGCGATTTGTACTTGGTTATAGAT…	ARS601.1	6	29600	30400	57.97	0.05	7	AAAAAAATTTA	0	29826
TTTGACGGGTGATGCCCTTCCAGATAAATCTCGTGGAGATTGGCTAGCGTCAAACGTCACCGATCTCTATTTCTTTTTTAGGTTATTAAATTTCGATTACATCGCGTGTTCTTAGATAAGTTACCAAGGGTGCTCAAAGGAAAATTATATTTCTTTTTTTCTTTTGAGTAATTGCAGGTGAAGAGATACAGAGCAAGGAACGTGATGTAATGCATTTTTTTTTTTGTTCCTTGGAACCACATGATTTACTCAACAAATTAATCTAGTTTGTGCTTCAAGCATGCACCATTGTGAATATTTTTTTAGTTTCAAGGTGACAGGTTATGAAGATATGGTGCAAAAGACAAATGTATGGTGGCAGGCATAGTAAAATGATGGTGTGGAAGACATAGATTGTAT…	ARS601.2	6	31600	32000	57.97	0.05	9	GAATATTTTTT	0	31609
CGTTATCACAGCAAAAACTCATTTCAACAAGCTCTGCAAATGAAGGCAATGGACATACCAATCGGAAGACATGAAGAATTACTTGCGCAATATGAAAGTCAAGCTCCTGATGGTTCCGCTTCAATTTCACTTCCTAACCATATTCCATCTGTCAATCCTAGCAATAAACCAATCAAACGAATGCTAAGTAGCATTCTTGATATTAACGTTTCCTCATCAAAAAACAAGAAGTCTGAGGAGAACGAAATGATAAAACCCATGAACAAGGGCCAACACAAAAATAATACATCGTTAAACATAAACGGCTGGAAATTTGAATCTTTGCCATTAAAATCCGCCGAGAATTCAGGTAAACAGCAATATTATAGAGGATTGCCGTTATATGAAAAAAACACGCTG…	ARS602.1	6	38000	38000	47.76	0.03	1	TAAACATAAAC	1	38056
TTGTCTTAGTTGAGAAACTACCACCACTGGGCACGTTCGGAGTGCGTATGCTACTGATAACCTCATAGTAAGTATCAGGATCTTTTCTCTTTATTACCTCAGCAACATAACATGTCGTGGACTTGGGCCCCGCAGGAAAGTGCAATGCTTTCTCGTATGAATACTCACGCTTCAAAGTCATGGAAGATCCGTCAATGCTCGTGAAATTTGGAATAGTGGTAATTTGTGAACCTTCTTGACCCCGTAAAAAATCTAGAAGAAATTCGTTTTGCTCTGAGTTGAACATGATCTCAAAAAGTATACCAGGTGCACAATCGAATGGTAACTCCTTGAGAACAAACTCGTTATTGGCCATAGGTTCAGCCGGAAAGCTTGTTGAATGATGATATATTGGACCAT…	ARS602.4	6	46000	46400	47.76	0.03	1	AAAAAGTATAC	1	46465
TACACCTGTAAATAATATTGAAAATGAGGAGGGTTTGAACAAAGTGGAAGCTGAGAACGATTCAAAATTGCATAAAGCATCAAATGCAAGCTCTGATTCTATAAAAAAACCTTCCTTGGATCCTCTTCGGGAAGTTTCATTCCACGGTTCAACAGAAGTCTTGTCAAAAGACGCTGAAAAGCTTATAGCTGTAGACACTATTGGAATGAGAGTAATCCGGCATACTTTGCTGGGATTATCATTAACGCCGGAACAGAAAGAGCAAATTTCTAAATTCAAATTTGATGCCAATGATAATGTTTTGAAAATGAAACCTACGAAAAACGACGATAATAATAATTCTATAAATTTTTTTGAAATTTACAATTCACTGCCAACATTAGAGGAAAAGAAGGCATT…	ARS603.0	6	59600	60000	49.02	0.09	6	GATAATGTTTT	0	59883
CGCTGAGCAGCAAGCCCAACGATCCTATCGAACAAATAAAAAAACAGATTTCCTTTTTGACCACAAAGTACTGAAAAAGAAAATTAACAGTTCGCAAACTTCCGTAAATTTGACTTCTTCCCCTTCGACTACATCCTTGAACAATGAAAAAAATAATGATGACGATGATGATGATTCTTATGACGAATATGAGGACGACGTGGAACCAGTGAACGACTTGAATCGGGACTCGCAGTTAAACATAACGAAAAATCTGCTATCTGATATGGAGAAGTTTGCCTACGTAGGTGCAATAAACATTTTGGCAAATCAAATGTGCACGAATTTGGCTACGCTGTGTCTTTGTATTGACATTAAATCCCACAAGAACCTAGCACATAGATTACAGTTTACCCAGAA…	ARS603.2	6	66000	66400	49.02	0.09	1	ATAAACATTTT	0	66364
TTAAAAGAACCAAATTCCGTTTGTGAATCATTCAATTTACTTGATCTGCGATCCCTCATATGTGGAGGTATAGCCAGTGACAAATTCTTCAGATTGGGTGAGTTTTTGGCACTTGTAGTAGTTGTACCGGTCCCGTTAGGTGTAATATATCCTGTTTCTTGAGGTACTGACTCTAATACAGAAGCAATACTTAATTTATTAACCGGTGTATGTGCACCAAAGTCATGCACGCTACTGTTGGAATTATTTGAGCTCCTATTAGTGGTGTTACTCATCGATAGTTTACGGGATAAAATATTTTTATGATTCAATGGTGGAGAGAGATTAGCTGCAGATAATTCAGAAACATCGGTGTTAATGCCATGTTTACCAAACAAAATATTGGCATTATCGTTTTCG…	ARS603.4	6	70400	70400	49.02	0.09	3	AAATATTTTTA	0	70430
ATATCAAGGAGGGAAAATGATAATTGAGATTCACTTCTTCTAAGGGACGCTGGGAGATCGATGTTCGAACTTCCGTGTGATCTGTCCTTCCCACGGTAATATGAAGGATAAACAACAGTGTTCGTACTGGGCGTTGGCGTCATTGAGTGGGAATTGGAAGTACTTGAGTATTCTGAGTGTTCGTATTGCTGACCTAGTGATGACTTCTTGCTTCTATTATACTGCTTATGATCTGATGTGAAGCTATCTGGGGTTGATAATTGAGAATGATTACTATTGTTGTTGTTCATGGTAAAATTATTTGCTGGGTTATCGATTGGTAAAGTGGAACTGATACTTAGCGACGACTTATGTGGGACAAACTTGTGACGGCGAATCAGACCAGCTCTTGATAAACCG…	ARS603.5	6	71200	71600	49.02	0.09	1	TAAAATTATTT	1	71507
GAAATATGGAAGAAGACCTTAAATTCATTGGGTGAGTTAGGATTGCATGCTTATTTATTTCAATTTGCTCGCGGATCAGTTGTACCACATAGTTGTTGACCTCGTTTTTAATCTTTAAAGAATAGGTCATTGCGTTATCCAACCTCAACACGGCATCCACTTTTTTCCTTGCCAAGTCCAGAGTATCGTGAATCAAAAGAGCTAGTCCAGGATCCTGATCATCATTGAGAAAAAATCTTGATTGCCACGACGTGACGTTTTGAATGTTGTGGTTAGTCCTTGGGGAAAACTGAAAATATGAATTCAAGCTAACTGTATCTTTTTGGATAGGGAATTGATCTAACAAAGCATTGTTATTATTATTATTATTATTATTATTATTGTTATTATTACCATTAT…	ARS603.6	6	73200	73600	49.02	0.09	1	AAAATATGAAT	1	73293
TACATTTGTTGCCCAGTTTGTTTAATATCGATACTTCGAATTTGGCGTTATGTGGCGGGATATCGAAATCTAGTGCTAGACATTTAATGGCATATGTATCCGACCTATAAATCCTAGCAGTTCTAGTAGATTTGACCAACTGACAGTGTGTAATGTCTATACTATCCAGTTTCATTAAGATGGGCGTGAATTTTGTTGCCTCTCTTCTTCATCTGGCCTCTTTGCTTCTATGAGACTTCTGTCGTTTTCCTTTTTTTAGGATCACAAACTACTTCTATAACTTAAATAGTCAAATCACATTTTCCACTAAGATACATATTTTCTATACAGGGGGTCTTTGCAGTTATATATACTCAGTTATATACCAATCTCTTTGTCAGGAATTTGATTATCACGTTT…	ARS603.10	6	78800	79200	49.02	0.09	1	AATCACATTTT	0	79275
ACGCATAAAGAATCAAAGAAAGGCAAAAATTACGCTGTACGATGGGGTCGTTTCCCTTAGCTGAGTTTCCATTACGTGATATCCCTGTTCCTTATAGCTACCGTGTGTCTGGCGGTATAGCTTCCTCAGGTAGTGTTACTGCGCTTGTTACTGCCGCTGGCACTCATCGAAACTCGTCCACGGCTAAGACAGTTGAGACAGAAGACGGCGAAGAAGATATCGATGAGTATCAGAGGAAAAGAGCAGCTGGTTCTGGCGAATCCACTCCTGAACGCAGTGATTTCAAAAGGGTAAAACATGATAATCACAAAACCCTCCATCCAGTTAACTTACAGAACACCGGTGCAGCGTCTGTGGATAATGACGGTCTGCACAATTTAACAGATATATCCAACGATG…	ARS603.5.1	6	116400	116800	41.38	0.81	3	AAAACATGATA	1	116388
GAAGTACACGATATTTGCAAAGTCTGTCATCAGGGCTTGATAATAAAGCTGCATTAGATCTTAGCAAAAACTACGAGAAGAACATTGAATATTGTAGCTGTATTTGCATACATAAACTTTATCATTGTTCGTTAGCTAGCTTTGCACATTAATTTTTCGATTTGTTACCGCCAATGACCGCTAACAATGACGATGATATCAAATCACCCATTCCCATTACTAACAAGACCTTATCCCAATTGAAGCGCTTTGAGAGAAGTCCAGGAAGGCCCAGTTCTTCTCAGGGCGAGATAAAACGTAAAAAGTCTAGGCTATATGCCGCAGACGGAAGACCACATTCTCCGCTAAGAGCAAGGTCTGCTACCCCAACGCTACAGGACCAAAAACTGTTCAATGGCA…	ARS604.0	6	123600	124000	35.56	0.14	1	AAAACGTAAAA	1	123591
ATAGCATCTGGAGCTCAGTCAGCGCAAACGTGGCCATCGACACTCACATGTATGATTTTGTTGGGTCAATTTCCAAAGACGTTCATAATAAGATTTTGAGTAGCGAGCATGAAAAGGATGTAGTTGGAGTGGAGTTTGGAGAATTCGGGATTTTTACTGATGATCAAATGACTTTTATGTTCAATAGGTTACAAGGCCATCTTAGAACAGACGGTCAAATACATTCGTATTCCCGCACAGTGAAGCCTTTTGTTTATGCTATAAACGGATCAAAAAAAGATAGGTTTTTTGAAAAACTTGTAAGTTTAGCCAAAGCAATCGAAACATTTATCCATCCCTCTAATAATGGGTTTTGGACCAAGCCAAATGCTAAATTCGTTCATGCATTTATAAAGTCTT…	ARS604.1	6	124800	125200	35.56	0.14	2	AAAACTTGTAA	1	124998
TAATCCTTTTGATATCATCTGGTTTCTGCGAACTGAATATGTCGGATCTCTTTGAGCTATGTGAATCCTACTATAACAAAGACGATAAGGCTTCGATGATCATGTCTGTCGAGATAGTGGCTGGCTTAGTTTGCGGGAGTAAGTTTATGTCAGTCTCTGACTTGGACAAACGTGACACTTTTATCGAAAACTTCCTAGCCAAATGTTTAGATTATGAGTTGAACCATGACGCATTTGAAATTTGGAGCACCTTGGCATGGTGGTTGCCTGCAGTCGTTGATTTAAGAAGGTCTAAAACTTTTTTTTGCCATTTTATCAACGCCGATGGCATGTTTGACCGTGAATCTGATGCAGCCACACATCAAACCTCCAAAATTTACATGCTAAGAAGTATCTTGA…	ARS604.3	6	128400	128800	35.56	0.14	2	TAAAACTTTTT	0	128679
TTTTTCTCAATATTCGCAGGTTATTTTTCCTTTATATATATACATTGTTTGTATCTTTTTTTGATTACCATACTTACTATTTTTATATTAGTCATATTAGATGTCACTTTTATATTATCTAAACAATTCAAACTTCTCACACTAACTTTTTCAGCATACTTCTACTGTTGTTCTCTGCTCTGGAAGGTATTTTCATCAGGCGATTGGTAAAAAATCAAGAAAGAATCTAAAAAATAGTGCAACAGGAAAACGAGGTTCCCAGTTTCCCTGGGAATTCTTATCCAAGTATATATTTTACTTTTAAGATTCAGCACTTTTATTTCGTTCTAATGTTTTTACCGGTAGTAAAGTTTTGCTTCTTGAATCCACTATTCAACTACTTGCGCTTATGTAAGGTTC…	ARS604.5	6	131200	131600	35.56	0.14	2	TTTTACTTTTA	0	131346
TATAACGACAAGTTATTAAAGTTAAATTCAGCACCTACTTTAAGATTAAGGTGGACTGGCCAGTTATCTGATAAGCCGGATATTTTCTTGGAAAAGAAAACTCTTATTGAAGACGAAGCCACTGGGAAGTCTGAATTTGATCTAACTAAATTGCAATTGAAACAAAAATTCATTAACGGGTTTATTTTCGAAGGTGATAAGAAATTTAAAGAACAAACTTTGAAAAAGTTAAAAGAAAGTGGTACGGCAGGGAGAGACCTGGAAAGGTTAGAAGAAGATTTCTCTGAGATTCAAAACTTTATTATCAAGAATGAATTGCAACCAGTTTTTAGAACTGTTTACACCAGAACTGCTTTCCAGATTCCCGGCGATGACAAGATAAGAGTAACCATTGACTCT…	ARS605.0	6	132800	133200	30.51	0.12	2	AAAACTTTATT	1	132965
AAAATTGATGGAATGAGAAGGCTTTCCAACTTAAAAGAGCCTCAACATCAAGCAGCAGTACCGGTATCTCAAGAGGAAAATGAGCGTATTACCTCTCAAGGTGATTTGGAGGCAGACGGTTCATCCGATGAGGAAACTGAGCAAGAACCTCATTCGAAAAGATCAAAGAAAGTTCGGAGAAGAAAACCCAAGGCCACTTTCTTGAGAATTTTGGCCGGTAGAGATCCAAAGTTAATGGGGGTGGATTCTGAAGAAGAAGAAATTGAATTGCCACCTGGTGTGAAAAAACCATTAAATTTGTTAAAAAATGCTGGTCCTGTAAACGTGGAGGCAAAGGTTTGGCTTGCCAACGAACGTACATTTAACAGATGGTTAAGTGTCACCAGTTTATTGAGTGTT…	ARS605.1	6	133200	134000	30.51	0.12	1	TAAATTTGTTA	1	133817
CATCTAAAATTAACAGTGTTTCTGTATTTATGTCATCTAAAAAGTAAGCCATTTCTTTCATTTCAAAACCAAAATTTGATGAGGTTAATTCCATACTGTCATTGCAGACTCTTGCATGTAGACGTTTAAAGACAGGAAAAGACCCATAAAGTGCCGGTATACCTGATCCCATTTGGGCCATTATGCAAATAAGGGCAACTTGTTTTAAATAAACAGATTTTCCACTCATGTTGCATCCGGTTATGATTTGTAAGCTGGAGCTATGTTTTGTACTTGATATGGTGTTAGGGACAAAATTTTTTAGTACCTTTTCAAGTAGTGGGTGTCTTGAATCTCGAATTAGTAGATTGTTTGTAAAAATCGGTATTGTGTAATTATTTTCTTTCAAATTATATGTGA…	ARS605.2	6	135200	135600	30.51	0.12	5	AAAATTTTTTA	1	135306
TTATTGTTCTTGAAATGAATACGTCTGGAAGTGTAGCGACGTCATCGGTAAATTCCTGTCTTTTTATTCTGAGATAAAAGCCTCGTGCAGAATCGTAATTATGATCTAAATTGATTTTGTTTTTAGCGGTAAGATCTTCTACCTCACGAAAAAATTCCTCTTTTACCTCTTTGTAGATTTGTCTAGAAACATCCAAAAGCCCATTGGAATCACTTTTCACAGCATATGAACGTTGGTTAAGTAGTTGTATAGCTGAGGATGCCCAGACACAGTCTTCATTTATACAACTATTAATTAATTTTTCAATTTCCATAATTGCGTCATTATTGAATATTTTTTTGGTCTCGCTAATTAAACGGCTTTGAATTAACTGATCATTAAGTGCGTCTTTCAATGACT…	ARS605.3	6	135600	137200	30.51	0.12	9	AATTAATTTTT	0	135894
TAATACCAGGTTCATCGCCTTGAGATTTGCCTATTTGGGATGGAATTACAATGGCTTAGCTGTTCAGAAGGAATACACACCGTTGCCTACAGTAGAGGGTACCATTTTGGAGGCCATGAATAAGTGTAAACTTGTTCCCTCGATGGTTTTACAAGACTATAAATTTAGCAGATGTGGCAGAACAGACAAGGGAGTTAGCGCCATGAACCAAGTTATATCGTTAGAAGTCCGTTCCAATTTAACAGATGAGGAACAGCGGGATCCGACCAACGACAGCAGGGAAATACCCTATGTTCACGTTTTAAATCAATTACTACCCGACGATATTCGTATATCAGCTGTCTGCCTCAGACCGCCACCTAACTTTGACGCAAGATTCAGCTGTGTTCACCGGCACTA…	ARS605.6	6	147600	148000	30.51	0.12	2	GTTCACGTTTT	0	147682
TAAAAAGTTCACTAGATGGTGATCCTTATCGTCTAGCTGTCTACAAGTTGATCGGAAGATGCGACTTGAGTAGAAAGAACATTCCTGCAGTTACTTTAAGCATTGAAGATTGGTTGTGGATGCATCTCATGTTGATCAAAGAAAAGGACGCGGAGAATGATCCTGTTTATGAAAGATATTCCTTAGAAGACTTCCAGAATATAATAATATCGTATGGACCATCTCGCTTCTCAAACTATTACTTACAGACCCTTTTGTTAAGTGGGCTCTATGGATTGGCTATTGACTATACTTATACATTTAGTGAAATGGATGCGGTGCATTTGGCAATAGGGCTAGCAAGCTTGAAGCTATTTAAGATTGATAGCTCAACGCGCTTGACCAAAAAACCCAAAAGGG…	ARS605.7	6	151200	151600	30.51	0.12	1	TTATACATTTA	0	151493
GATAATATCGTCCATATCCGCAACGACTAGAAGGTTAGGCGGAACCTTGTATATATTTTTGTAAAATCGAACTGAATACAGATAATTAAGGCGCGCAAGCAAAAACGGCATTCTTTATGAACTCTGCAGAGGTGCCCTTTATTACGACATATATGGGAAGTAATACATATTGATTCTACAAGAAGTTCAAGCCAAGGTTTAGATATGAGTGACCAAATCAACGTTTTGTCAATGCAACAACAACAACAGCAGCAGCAGCAGCAGCAGCAAGTATATATGTCTCCTCAAGCAGAAAACTTGAATCATATGTACTTGTTAGTTAACAAGCTAGTGAAACAGTTGAGGGAAAATCAAGCAGAAAAGGCGAAAATACTAAGGAACATAGACATATTATCCGGA…	ARS606.0	6	160400	160800	30.98	0.33	2	AAAACTTGAAT	1	160615
AAACATTATTATTGATTTATCCAAGGATAGTTTTCACAAGAAAACAAGCGCAAGTGGTTTAGTGGTAAAATCCAACGTTGCCATCGTTGGGCCCCCGGTTCGATTCCGGGCTTGCGCAGTTTCTTTTTTTTCTGATTTTTATTTTTTTGTTCCTGAAAATTTTTCGTATTATTAGATCTAGTAGAAAATGAAAGACATTTGAAAAGAGAAATATATATTCTGCAGTAAGCTAGCTAAGACTAGTCGTTTTGAAGCGCTAAAACGTTAACTTCGATTCATAGCACAAAAGGTAAATAACTTTTTTGAAATGGCAAGCATCGGTTCGCAAGTGAGAAAAGCTGCTTCTAGTATTGACCCTATCGTCACGGATTACGCAGTGGGCTACTTTAACCACTTGTC…	ARS606.1	6	162400	162800	30.98	0.33	3	AATAACTTTTT	0	162465
GCATTGTGTTTAAATAATCCACACATTTTGGTTCTGGATGAACCTTCTAACCATTTGGATACCACTGGTCTAGACGCTTTGGTAGAAGCCTTGAAAAATTTCAACGGTGGTGTCTTAATGGTTTCCCATGATATCTCTGTTATTGACTCTGTTTGTAAAGAGATTTGGGTTTCAGAGCAAGGTACTGTCAAGAGGTTCGAAGGTACAATTTACGACTATAGAGATTACATCTTGCAGTCTGCTGATGCTGCAGGTGTGGTTAAAAAGCATTGATTATTTAGGAAGCACCTCAGAATATATTTTCCATAGAAGCCTAAATTAAGTATGCATTCATAGCCCCATGATACTTTTTTTTTTGACTACTTGTATTGGAATCTAATTGACCTAACTGGGCATTCT…	ARS606.2	6	163600	164800	30.98	0.33	2	GAATATATTTT	0	164758
AACTTGGAAAAAGGTGAAAACCCATCTTGTGTTTATAACTTGATCGGTGTCATTACACATCAAGGTGCCAATTCTGAGTCTGGACACTATCAAGCTTTCATAAGGGACGAACTGGACGAAAATAAATGGTACAAATTTAATGATGATAAAGTTAGCGTTGTTGAAAAGGAAAAAATTGAATCTTTAGCCGGTGGGGGCGAAAGTGATAGTGCACTGATCTTAATGTATAAAGGATTTGGTCTGTAAGTCCATTTTTCATTTTTTCAAAATTAATAGTTTTTTCGGAATATACATATACATTTTTTTACATACACATAAAAATATTTCTCTCCCTTTTACGTTCATCCGCCAATCGATAAAAATGCATTTTATATACATGAAATGGCGAATTCTTTTTGG…	ARS606.3	6	166400	168800	30.98	0.33	10	ATATACATTTT	0	166604
CACCTTCCACACAGAACTCTAAATCAAATGATAAAGTAGAGAAAAAGAAGACTACCTCAATTGCTAAGGATGGCAAACCTACACTGAAGACTAATGACAAAAAAGTGGCGCCGAAACCTAAACCAGCCCATGAACAAGTAGAACCCGCTTTGATCCCTAGCAATTGGACTTCTGTAATACCCTTGCTTACTTCTGATTTCAAGAACCAGTATAGTGTCATCTCTAGGTTAAAAAATCCGAACATGAAGCCTGTGCCATATGCTGGAGATATCATTAAGCTGATGGCGTTCATAAATAAGTTTAGTTCTTTTTTCCATTCTGACCTACAAAATTTATCATTCCAAGATTTTGAGGTCGGTTTAGATTTGTATCCCGGCGATCCTAATGGAAGCGCAGCTG…	ARS606.4	6	170000	170400	30.98	0.33	1	AAATAAGTTTA	0	170478
CCTTCCTATTCGCATGGGAAGTTGGATTACGATTATTGTTGATATCTTCTATAGTATTAGAACCGTTTTGGCCCTTTCTCGGCTGACCAGGCGAAGTCTGTGGGACGGCTGAGCTCTTGAATGAATTACTTCCATTATTCGCCGTAGAAGGTTGGCTCGAATTTCTGGCACTAAGCGCCCCATGACCGTTGGATGGCGGCGTCATGGTTAAATCTCTTAATTCACCTTCAATGTTATTTTGCGCAACCCTCTTGTCGTCTTTAAGTTTCTTTTTTTGTAAGCGGTATTCTTCTAAACTTATTAAGGGATATAAGCCGCCAATGGCCTCACTAGGCTTCAAAGAAATTCTGGTTGTGTACTTCCATTCTCTAAAATCATTCTGGTGTAAATATAACCAAT…	ARS608.0	6	208800	210000	38.75	0.42	1	TAAACTTATTA	1	208969
TTAGGAAAGGTAGGGTAGATCAGTTTAGTACCTCAATGGGTGCGGAAGGTTAATCTTGAAAAATTTGCGATTAGTAGACAAGTTTATTCTCACAAGAACAAAATATTCAGTTCATTTCAGATATGATCGTGAAGGTGGAAATCTTTTTTTTAAAAATGAGAAGTGTGCCCAACAAAGAAGTAAAAGACAAGTTAGCTTTCTGTCATGCTTGAAAACTTTATGGAAGCCTGTGCATTGGCATTAGAGGCATCTCCGACAATCAGAAGAACACTTCTTGTTATTATAATTACCCATATATTTTTTTTTTTTTCAAATTGACTACTAGGAAAAAGTGACAATTTATAGTAAAACTGGCTAGAAAAACCTACAAGAAAAACAAAACCAGGTTAGGCATACATT…	ARS608.5.0	6	245600	246000	56.61	0.29	1	ATATATTTTTT	0	245942
ACAACTGGCATGGAAGATATTCCGGGGTTGTTTAACAATAAACGTGTAGAGTACAGGTAGAATATAGGCGAAGCCGCGGTGAGCACGGAATCGCGCATGGAAGAAAACACACCAGGTAAGCCTTTGGAACGCCATGTGTAAGGTGCAATGCACATGAGTGATTGTTAAAAACAGAAAAGTAAAAATTCCGATCTTGTCTGGAGGATCAATCGTCCTCTCAGTGCGTTTTCTTGGCGAGACAATTCAATTCGCTTTATGCTCTTTTTTTTTGTGAATTTAGCCAATTCCGGAAAAAACATAAAAAAATGGTTATGCATTCTTTATTTTGAAGAATGAACTAGATATACAGTAATATACTAAATTGTCAGCTCTCGGCATAATTCAATGGCCGGAAAGTAG…	ARS609.0	6	256000	256400	51.12	0.07	1	AAAACATAAAA	1	256360
TTACCAAAATATCTCCGAATAAAAAGAAGAGGAACATCTTTTAATGAATTATAGAGTACAAAAGAATCATTTAAAAGAGAGGGCGAGTGAAAACATGAAAAGAAACGTTACTAACTTAATTGACCTTAAAGTAGCCTCACCAGTTAAGTGCATTATTGATCATTCCATGAATAACCATTTTTAAAGACTAAGATGCTGAGTTGTGTTATATAGAGAGAAAAAAACGTACTTTCAGTTTCCATATGAGGTGGAGCGCAGGTCATAGGTATGCCGGCTCATTGTTTTCTATTTTAAAAAGTAAAAAATATGCTGCTAAAGGAACACGTGAGAAATTACATTCTCCCTAGGTCTGCGATAACGCGGTAATATTACACTGCCGCCGCCTTCCATGCCTTTGGA…	ARS610.0	6	263200	263600	77.05	0.03	1	AAAAAGTAAAA	1	263222
CCATGTATGCAACTGCTCTACCATCATTACCATCTGTAACAGCCGCTAGCATCAAAGACGGGTGTTGGAATTTGACAATTTGCTTCAATGTATCCAAGGAAGTTTTAGGTAATGGCAGGCTAAATCTTCCAATCAAACAGCAAAATACACCTCAAGACGCCCCAAGAATTTTGAATGAAGGCGAGCTGAATCCCGAACTTTGTTCTTTAATGTACAATTTAATACCAAAATGATTATCCAACTTGATTAGCTTCGATGACTCATACAGATCCATACCAATATCAACTTCACGGATAACTTTTTCAACTCTTTTAAATTCTTCAACATCATTTTTCGATCAAACTGCGTCAGGTTTTACATATAGATCAAGCGTTGTCGGTTTATACTACGATGTCATTT…	ARS610.1	6	267200	267600	77.05	0.03	1	GATAACTTTTT	0	267409
GCGAAAGTTTTAATTAAAATTTACTGATAGTTTTTTAATGATGAACTTCTATAACTAAACCATAATAATGAAAATTACAGGTAATATTTATATCACAAGAAACGGCCCCTCTTTTCTGTTTTTATATAGTAACCATTAAGAATAGTTGGCTAATCTACTATGAAAGTTCCTAATTAAAAAAAATTCATGAAGAGTTAATCAACGTTCCAGTACCAAATTTATTCTATGTTCTCCTTGGAAGATGAACTTGCCGCAGTAGATCATAGAACCTCATTTTCAACGTTTTCCAAAGAAATACTTTTTTTATTTAACTGACAAATATTAATACAGTCTTTATATCATCGATATGACTAAAGTACATCGGAATTGCCCAGCAGTAGAGCTCGTGATCGAATAGAA…	ARS700.5.0	7	18000	18400	45.44	0.05	5	AAATACTTTTT	0	18144
TCCTTTCACACAAAGTCTAAGTTTACACTTTTTGCAGGATTACTTTTTGAAAATTCTCGGCTTCTTATTATATGATATTAATTTGAATAAAGCTACAGAATTTATCCTCGTTGATAATAACTATAATTCTACAAATGAATTTTGGGATGGACTCATGGACAGGTTGTCACCATATTTGAGTTATTTCATAGATGAGAAGCTGAAAACAGAAGAAGACATGATTAAATTGAAAGATTTTCTTTGTATTTATGTTGCCATTTTAGAAAATTTCAAACTGAACATCGAACCTTTATATAAAATTTTGGTTTCAATTTTCGAGAAATTCTGCTCTGTTTCCTTGAGAGCTTTTGACGATGAATTTCAAATCTTGTTAAACGATGATGATTTTATGCCTTTATC…	ARS702.3	7	60400	60800	41.41	0.07	4	TATAAAATTTT	0	60554
TATTCAAGAATTAGACAGGAAGATGCGGCTCTTTTGTTGAGCAAGATTCAGCACTTCGTCTCATCTGTAGAAGGAGCTAACGGCGATGACACTAGCGTAATGGATAGTAGCAGCATATTCAACTCTGAATCAGCGAGTGTCATTGACTCTAATACGAGTAGGATAGCCAAATTTTTTAATAGACGTTAAAAAATTAGATATTATCTCAGTATAATCATTTGTACGTTCATAAGAAAGAATTTCGGACAGTCTTGAGTTTTTTGGTTTTAGCATCGAAAAAGTTCACTTCAAATAAATTTTTTTTTTATCATTGAATAACTCTTTATTTTTCACGTCAACCAAATACATCTCAAAAGTCTACTATATATTGAAAAGTATCATACAATTAGTGTAAATAAG…	ARS702.4	7	62000	62400	41.41	0.07	4	TAAATTTTTTT	1	61956
AAACAGGCAAAGATTTATCTTCAGGGGAGACAAAGAAGAAAGACCCCTTAGCCTTCATCGACTTGAACTGTGAGTGCGTGACATTTTGTAAAACAAGAAAGCCAATTGTTCCCGAAGAATTTGTGCTAAGTATCATGAAAGACTTAGCGGATCCCAAAAATATGGTTAAACGTACTAGATATGTTCAGAAATTAACACCTATTACGTACTCTTGTAATGCAAAAATGGAGCAATTAATCAAGTTGGCCAATTTGGTTATTGGGCCACACTTTCATGACCCTTCGAATGTTAAAAAAAATTATAAATTTGCTGTAGAAGTGACAAGAAGAAATTTCAATACGATTGAAAGAATGGACATCATTAATCAAGTTGTGAAGCTGGTCAATAAAGAGGGTTCTG…	ARS702.5	7	62400	63200	41.41	0.07	2	AAAAAATTATA	1	62712
TTATAAGAAAAATCCATTCGACCATTGAATATCTGCTGAATAATATCAAATACAATGTTGTGCCAAAAGTTATTCCAAGGATATCTTAAGAATAATTGTAGAAACTTTGGAAAAAACCCAAGGTCATGAAGTTTAATTTTGAATAAATCTCCAATGGTAGGGTTTTTACGTATTTTCAAATTTTGCGTTTCACTGACGTAAGGAATTTCAAAACTCATATCATCATCATCATCAATATTGTCATCAGATGTATCAAAAGTAGAATACAATTCATTATCATGAAACTTTTTTTTAATATTTTTTTTTTGTTTTTGGTTGTCATTACTGTCATTACTATCATTATTATTACATTTATCTTCTAATGTATTGGAAGTAATAGTATTATCATTTATATTTAAA…	ARS702.6	7	65200	65600	41.41	0.07	7	TAATATTTTTT	0	65382
TCAAGTATCGAATCAATTCCGGAATGACTCAGCGTCTCTCCAAAGGGCCATAGTGACATATTTTTATTTTATTTTAGCTTTATCGAAAAGCAAGAGAGCAGTAAACTGGACGGTATAGAAGAAAAGAGAACTTAATAACAAAAGACCAGATTGTCTATAACTTTATCTCACACCAAATACCAGGTTGTCCTTTTCCCGCTGGGTGAAGCAACCGTTTCACTTATTCGCACAATCCAATTAGTAGAACACAACACAACACAACACAACACAACACAGCACAACACGCTTACCAAATTATATTTACTACGGCAACCAAAAACCGACAGAATAAAAAACAGCCATCATACGTGGATGAACTCTTGGTTTATTGTCTGTTATTATCCTCGAGAGTTCTTATTT…	ARS702.7	7	67200	67600	41.41	0.07	1	AATTATATTTA	0	67191
AAATTGGTTGAGGAGGCCAACCATTTTAAAGCCAAGTTTCAATCTTTAGATGATAAATCTAAGAAGTTCTTCTCCAAGATTTCGCTAGCCATTAACGATATTGAATGTGTGGAAGGCATTGATAGTGAAACTGGCAAGAAAATTTTCTTCGATAAATCTGGAAGTACTGAGATTTCTCAGTACATAACGAGAGAGTTAGTTCGTGAGTACTTCAACGAGACGCGCTCGACGTTAGACGAACTGACAAATGCTATGGAGAAAGATTTGAGCGAAATCACTGATGAAATTGAAAAAAAAGTTAATGCAATTAGAGAGGAAAACGTCGAGGTATTTGAAGAATGGGGTGATATCATTGTAAATGAATGGTCCAAAAGAATGGCTTATGTGGATGTTATCAAC…	ARS702.8	7	68400	69600	41.41	0.07	2	AAAAAGTTAAT	1	68809
GAGTGAGGAAGGTGAAGACTGGGATGAATTAGAGAAAAAGGCTGCTAGGGCTGATAGGGGTGCAAACTTTAGAGATTAGACTTTATAACACTTACTGGGTTTCACCAGCAAGACCTTGATCTGACAGAAAATTACTCTTATGTATCTGAAAAATAATGATGGTATTTAGGCATAGTATTTATCAATGCTAAGAAATGTAAATGGACTGAATGTACACTCAATGCTAACGGTCAAGGTCATAGGACGTTTGCGTAATAAAAGAAACTCTACTAGAGTTGAACATAATTTGATATAAAAGTATATAAATTGAAAAGGCAGTTTCAATCATTTTAGTTTCTGCAATTTATTTATTCCTGTAATCTACAATTTTATAGTTGGGAAATTCTCTCGAAAATATTA…	ARS704.0	7	102000	102400	43.29	0.07	1	TAAAAGTATAT	1	102292
AAGGACATCAGATCGACCAATTCGGTAAATTCAATGGGTAGGTCACTCATTGGTTAGAACTTTCGTGATAATTTATTTTTATAGTTGAATATCTTCTTTCTCTCTCAACTCTGATCCGGATTGTCGAGGTTTCAATAAGTTACTCTGAACAACTAATCAAAATATCTCCTTATTTCTGTAGATTCCTTCAGTTCCACTTTTTACTTTTCTTAATTCTCTTTGTATTTATTCCTAGCGACGAAAAATGCGAGATCTCGACCAAAAAAAGGGGGTAGGGTAATAAAATTAACCCTATTATTTTTTAACTTTAAAACCTATAATGTGCTAATATTTTATTATAAACCTCCTTTTTTTGCGTTCAAACCCTGACACATTTTAAGCCCTATATTTACGGTATTA…	ARS704.1	7	107600	108000	43.29	0.07	4	TATTATTTTTT	0	107749
AAAATAAAAGAACGCTACCATAAAAATGTTAAAAACTGGTTAAAAATGTCAAAAAATGGTCCGAAAACTGAAAAAATATTCGTGATACAGTTTGCATAAAAAAAAACTATTGTGCGCGATTAATATAACCTACTAGACTTAAATGACGACACTTTAATATGAAGTTCAGTAGTGTGAATTAAATAAAACAGTCAGTTCTTGATGGATTGTACCCTTTAAAGAATTTATCTTTATGTCGCTGTTACTACGAAAAGCGTGTGCGAGGTATTATAACTATTTTTCTGTATTTTTTATATATTTTTATTTGCCAAGTTAAAAATCAGTCATCTCAAAAGATTCATCGATTTCAGTGTTCGGAAGGCTAGTATACTTCTTCTTTTTCTTAGTTTTCAATTTAGA…	ARS704.4	7	112400	112800	43.29	0.07	2	ATATATTTTTA	0	112457
GACGGAAGGGATACTGAGATCCTTATTAAAGCAGACATGGCTAGCCACGTTCCGAGCCACCTATTGTAAAACATCTATTCAGGTCTTTATCTCTACGGTATTCTATAGCCAAGGTACTCTTTAACCAAAGTATGCTTCAGCAAGCTTTTTCAAATAGATGGGAGTTGAAGACAATGATAAGAAATCGCTTTTCTTAATGTTTCCTATATTATCAAAATATTCCACTTTTTTTTCTTTTTCCACATTGTTTTTCGGTTCCGGGCTGCAGTAAGCAAATATAAATGTTGGTGACAAAACTTGAAAGTTATAGCCAAAAAGCTCGCAATTCCTCACCTAACAAAATGATCCTGTTGGAATAAAAATCAACTATCGTCTATAAACTAGTAGTCACACTACCAG…	ARS704.5	7	114400	114800	43.29	0.07	1	AAAACTTGAAA	1	114885
CAATAGCTTCTGATAATCTAATCATACTTTCAAGTTGCCTAACTGTGATTCTATAACTCGATCTACTAAATCCCTGGGCATCATCCTTTCTCAGTTCCTTATACTTCTCGACTAAATAGGAACGGGCTTCTTTCGTTAATATTGGTTTAAAAGTACGTGCATATTTGATATAACGACGTAGTTGTTCTGCACTAAATGGCGGCTCAATGGCTTCGTCTCTTTTCATGTGTAAGTCAACGATATGAGATGCCAATTCGGTATCAATTTTTTCGTTACAGTCATCAAGAATAACAAAAAATAAATCAAATCTGGACATGATCGGTGCGGTCATATTTAAATTACCCCTCAGTGATAGTTTCCTATTGTATCTTCCACCTACCGGGTTGGCAGCCGCTAGAA…	ARS706.2	7	118800	119200	45.45	0.03	2	AAAAAATAAAT	1	118771
ATCCAGAATCTCTTGGTAGACTCGACCCATTCATATCATCGTCCTGTTGCTCATCTTCATCCGCTTGACCTTCGTCACCTTCGGATCTCTTCAATGAGTCACTTGTGTTTAACAATTCAGGTGCATACTTTCTTACTACTCTTCTTAAACCCTTTTGTAAAAAAGGCAAAAATCTGTAATATTGTTCTGAGATAGCCATAGCTAGAGCACCATTTTCTCTCATGGATAAATGCTGATAATCTATATAAATGGTGTTTAGGTCATATATTTTCATAAATTCAATTTGAGCTCTATAAACTTTTTCAACTTCACCAGTATCAGTGGATTGAACGGAAAAGTCTTCCAAAAACTGCTCGAACGCTTCACGGACTTTTTCACCAGTAACGTCATCAACTTTCT…	ARS706.3	7	120000	121200	45.45	0.03	2	ATAAACTTTTT	0	120502
AGCTATTAGCACCGACAGGTGACTATTTTGGATTCAATATCATAATCGGTGGGTTTCATCCAAATTACCAATCCTCTAACTTTCATTGTTTTATATACGATATTAACTCCGGAAAGTGGTCACGAGTCCGTACCGCCTGCCCTGACTGCGATATCAATAAACATCGATTCTGGAGGGTATTTGTTTGGAAATCGCATCATCAGACGATTTTGTTGGGTACCAAGACTGATGATTATTATTCACCCAGTGTACAAAGATTCGACCATCTTTCCACTTTTGGATTACCGCTGGTAAATATTTTTAACAAGACGATCCAATTACCCCATCACAAGATCTCAGCTTCGTCTTTACCAATACCCATAGAAAATTTTGCGAAGCATAAGGATACTCCATTAAAAA…	ARS706.5	7	126000	126400	45.45	0.03	4	AAATATTTTTA	0	126071
AATTGCAGAATGTTCTGATTACTTTTCATCACCCAAAGAGTCCATACTACCACTACCACCAACCATTGCCGGTGAGCGGTTTCTTGCTCATTAACATGACGTACAAGGGAACGGAATGTCCCTTGTACGTTGTAATGTCTTTTGCTCTCGTAAAGAAGCCTATACACGCCCCTTCCTTCCGCCCTTCGGCATCCGCTGCCAACTGGGTGGGGGCTCAATGGATCTCTTTACTCTGGCCCTTAGAAGCCTTCTGAAATTCTCGGCTTAGGCATCGAACGATGAAGAAACTAACTAAAAATATACGCCATTTTTTTGGGGAGGGGGGGCCGCACTGAAACGCGAAATGCCAAAAAAACGCGAAACGCCGCAGTAAAAGGTCAGTACCGCGCAAAAAATACA…	ARS707.1	7	166000	166400	38.97	0.72	2	TAAAAATATAC	1	166178
ATAGGCCTAGGTACCAGTCTCGGCCGTTCACCGGCTCCTATTCCATTTGGTGGTCTGTCTGGTAATCTGCGTCTTGCCATCAGTTATAAGGAAATATATATGGTACCTTGAAATAGAGCTAAGTTCTGAGCGTTTGATTTTTCTATACTTTCGTAGCAGCTTTAGTGAAGAAAGAGAAAAGTTGCTGCTCTAGATTTTGTATCGGCTATTACGTCAAGTGAGAAGAGTTTTGGCCTTCGCTTCAGTTAGATCTTCTATTATTTCCTTTTTTTTCTTTTTGTTTGTAATTGTTTTTTATTTTTTTTTTTGCGCGAAACTTTGCTATATTGGGTAACGCGTAAAATACTTTTTATTATTGCAGTAAGGCGGAAGGGTCTTCCCCTTTGCATGTTAAATAGC…	ARS710.0	7	196400	196800	36.49	0.36	3	TTTTATTTTTT	0	196620
AAAAAATGGGCCGATTTTAAACCATTATAGGTCACAGAAAAACTTTCTTACGACGGTGGTTTTTCAACAATACGTTTCTTGAGCAGGAGAGGAGCTTTGTTCTTTTGCCTTAGTTTTTTTTGTCTTTTTTTGTGAGCCATCCTGCTGTCGTTGCCATACATGACAGATCCACATTTGCCTTGTTGTTTTTAGTTTTTGTTCCTTGCACCATATAAAAGCGTCACTTGTATTTTCCTTACTCATCTAAACTTCAAGCTTTTTCGTCATAGTAGGTTTGTGATCTCGGCAAAGAAAAAAAATTTTTTTGCCGATCTTTCTGGTTATTGTTTCAGGTATCTTTATGAAAGTATTAGTGTACGCACTGGATTTTTGGTAGGTCTATAAAAGTGCAACACATAA…	ARS710.1	7	197600	198800	36.49	0.36	7	AAAAAAATTTT	0	198000
TCTACCTAATGTCTCAGATAAGTACTATTTGGAAGAATCAAATGTGAATGATTCAGATATGCTAACAAAGTCTCATAATACCGTTCAAAGCTGGCTTTGTGATCTTTTTGTTAATGGGTCCATAACAGATCAATTGATCCAAAATATTGAAACAAGGCAATTGGCTAATCTCATACCATTTATTGTTAAACAGGTTTTGCTATCTGTTGAAATAGGCGTTTTAACGGATATTTCAAGTCTGATAGGTGGCTTCGAATATTTCTTACAACCTTTACTATTAGTTGGGCTAATCAAAACTTTTTATTGGCTAGAACAATTTCTTTCTTGCGTCAAGAACGACACAATATCTGAAGATATTTTACAAGGGATATTCAATTTATTGAATACACTTTTCAACCC…	ARS711.0	7	219200	220400	39.11	0.01	1	AAAACTTTTTA	1	219810
TGCGTATTCTGAGCCATCTCTCCTGATATATAAGACAGATATTAATAAAGGTGATATGATATAGATATATAAAAACACTAAAAAATTAGGCAGTATGATAACGAATATCTAATATGAAAAAAAGATGAAGATAGCAGATTAAAGATAGACATTAACTCCGCTTAATGTAAATAACACAATATGAATACCTTTTTCATGCCAATGCACTTGCCGCTTCCTTAATTCCATCTTGACTTATGCTTTTGCTACCTTCACGAGTGACTTCGGAATCATTTTCACCCACTTCAATGGTTTTAATGTTTTTTTCCTGAGTCTTACCTTCCATGACGACTTGTTGAACTTGCTCTTTTTGCTTTGCTCTATCCCTCATTCTTTCTTCGATGGTACCACGAACAAGTA…	ARS711.1	7	221200	221600	39.11	0.01	1	TTTAATGTTTT	0	221206
AAGACATGAAGAAGACGCCGGCTGTGACGCTGGCGCGCGATCCAAAAAGAAGTGTCTTTGATGACTATACAGACCATTCAGCTTCAGAACAGACGTAACTCAGCATCATTCTCTTGCGTTCTTTTACCATTTCTCTTGCCCTTTTGTCGTATTTTTCTCTTCTATAGTATGAGTACTTCCTGTTTTTCACCTTCCACGTGGATATTTTCACGTTTGCGCGCTGCGTCTTTCTTTTTCTTTTCTGGTGACTAATCGGTGGTCCATCGCTGGCCAATGAAGCATATAACTGATGTTTAACATTTAAATCTTGGTTTAGACGGCATCATCTAAGCGTTATTCTCATCGTATAGTATCGAAAAAAGAAAATAGTATCATAGCACAGAGGCATGTCAACGTTTG…	ARS711.2	7	226400	226800	39.11	0.01	1	TTTAACATTTA	0	226308
ATGCTACCAATTATAAATGTATGAGTTTACACGAACTAGTAAAAATATTAAAGCTAAAGTATGATCCAAACAATCAGCAGTTTTTAAACCCAGAATACATTAAAACAGGTAATTTCACATCATTGAAAGAAGCTTATTCCATTAAGTACTTGAAGGACACGAAGATTCAAGATGCACTCTATAGGATTATATATGGTAACATATTATAGCTCGTAAAAAAAAGAGAAGGAAAAAAATCAACAAGACGAGTATTATTCCAAATGTAACTCCAGACCATTCTATAAACCGTAAATAAATATATAAAGCTCTATCATTGTACCAAATCACTATTCATTTCTTCAAACCGAAGGACCTCATCATTCGGATCTTCCGAGGCATTTCTCCTGTCGATTACGGCGC…	ARS711.4	7	232400	232800	39.11	0.01	1	TAAATATATAA	1	232435
TGTCACTTTTCTTATACTTCCAATCTGTTGTCGTGGTTGCCATGCAACATGTTCATCGAGTTCCGCCTATTGCAGCCGCCTGGGCGGAAAACTTGGTTTGGTCAATGGGGTTAATTAGAATCTCATTCATGCAAAGGATTTTCCGGTGGTATGTGCAATCCACTGGTGGTACGCCTAGCTTATATCTGACTTCAACATCTATGTCTGTTTTGGCTCAAAGAAGTTGGCAATATTTGATGGAGCTCCCATTAATCAAAAGAGCTACCAATGTTTTGTATGGTAATGCAAATACATTAATTTTTAGAGGAATCAAAAGGCTAGGCTATAAAATGGGAATCGAAAATACGTCCATCGTTTGTACCGGTTTTACTTTCTTCGTCTTATGTGGATATGTGTTGG…	ARS712.3	7	246400	246800	57.16	0.02	1	ATTAATTTTTA	0	246630
TAACAGAAAGCTGCAATAAATGGTAGCTTGTAATGGTGAATTAAGACACCCAATCGAAACAATTATACGGACACGATGAAGTTGGATATAAAGGTATGTTACCAGAGCGCGTTTTGCCAATGCAATTGCGAACAAGCTCCGACAACTCCTATGATTAGGAAATGATCTCGTTCGCGAAGAATACAAAGCCTGCAAAAAGCAAACATTAAGATTAGTTACTAACAGGAAGATTTTTGAAATAAATGCATTTGCTCTTGGCATTTCCTTTATTTGACACTGTACATTTATGATAGAAAACTTTTAGTAATAGATCCGATCGAGTTAAAGGTATCGATTTCCATCCTACTGAGCCATGGGTTTTGACTACCTTGTACTCTGGTCGTGTTGAGCTTTGGAATT…	ARS712.4	7	249600	250000	57.16	0.02	1	GAAAACTTTTA	0	250089
AGGTTCAATTTTAAACTTGCTGTTGAAGCTTTCACAAATGCACATGATCTAGAATCTTTATTTCTATTGCACTCATCTTTTAATAACAAGGAGGGGTTGGTCACTTTAGCTAAAGATGCTGAAAGGGCCGGTAAATTCAATTTGGCTTTTAATGCATATTGGATCGCTGGCGATATACAAGGCGCTAAAGATCTTTTAATCAAGTCTCAAAGGTTTTCCGAAGCCGCTTTCCTTGGATCAACATACGGTTTAGGAGATGATGCAGTCAACGATATTGTTACAAAATGGAAGGAAAATTTGATACTCAACGGTAAGAATACTGTATCAGAAAGAGTTTGTGGGGCCGAAGGTTTACCAGGCTCTTCGAGTTCAGGAGATGCCCAACCACTCATTGACTTA…	ARS712.5	7	252400	252800	57.16	0.02	4	AAAATTTGATA	1	252443
TGGATTTATTTTTCCATCTTCAAGTTTTTGGGCCTCTTCTGCTGAAGTATGGTGACGTTGCAAGCCCTTGAATTCACCAGCATCATGATGGACAAGTGGCTCTTCGGATGGAAGAGGATGCTGTTTGGATAATTCTTCCGCAATCTCGGCGGCCTGCTCAGGAATAGAGGTCTCAACTGGATCCGGGTGTTCGGACGAGAATCTTCTTTTGGAACCCATTATTATTCTTGCAGTCCTAATCTTTCTATGCGCGTTTATAAGGTTATACTATCGTTACTCAATCGCATCCCCGTAAACGTGTTAAATATTACAATTGAATAAGTTTCTTTTCACCTCATCTCGCATTTGAAAATTTTTCAGAGGCACCGAAAAAAAAGAAAAAGAAATAAAAAAGGACTT…	ARS714.3	7	284000	285200	30.08	0.23	1	TAAACGTGTTA	1	284015
TATTCTCGGTATTCGAGCACTTGGAGAGACCGATCTGAATCCTGTGAGCGGCATTGGTAAGATCTCTCAATTGATTTTTGCCTTTATCATACCAAGGGATAGACCTGGATCAGTGTTAATGAACGTGGTATCGGGAGGTATTGCAGAAGCCTCTGCCCAACAGGCGGGCGATTTAATGCAGGATTTGAAAACGGGGCACCTCCTCGGCGCCTCCCCAAGAGCTCAGTTCTGTGCCCAATTGATAGGGGCCTGTTGGTCAATTATTTTGTCTAGCTTCATGTATTTGTGCTACAATAAAGTTTATTCAATTCCGAGTGAGCAATTCAGGATACCGACAGCAGTAGTGTGGATAGATTGTGCAAGACTAGTAACTGGTAAAGGGCTCCCTGATAAGGCCTT…	ARS714.4	7	295200	295600	30.08	0.23	3	AATAAAGTTTA	0	295216
TGAGGCTACTATAATTGCATAACATAACGCCTTTGTAATTTTATGCTTGTTTTGCCTTGGCATGCTAACATTGGATAGCAACGATGCACTAGATAGAATCCTATTCATACTATGCTACGTACCTGTTTAACTCTTCTCATTTTATCCGTTTTCTTTCTTCACCGTTCCTCTTAAGTTCTTTATTTTTTTCATAACAGAATGATCACCCCTTTCACTTTGCCGCCAATATAATATTAACACACAAGAAATAAGTATGAGGTAGTTTGCTCTCGAAAAAACCAAGTAATAGTTCAAAAAATGAAAAAAAGAAAACAAATACCAAATTATGCCACCGTTACCTTACGTTTCATGGTTAATCATCGTTTACTGCCGCCTATGAGCGTAAGCTAATGTTATAAA…	ARS715.1	7	310400	310800	61.02	0.02	1	AAAAAATGAAA	1	310359
CTGGTAAGAGACATAACAAAAAAAACAAAAGTAAAAATGCGAAAAGCAAAGTTTTTAGCATTGAAAATAATTAGCGGTAACTAACATATATCTTCTCAAAAAAACTGTGTACTATTATCTTTTCATCTCGCCAATTAATGACAGCGTTATTTGAGAATAGACCTAAGATAATAAAACTATGTTCGTTACCCGGACAAATTTTCTTGGAAGAATTTTTGAGTCCTAGAGATATTATAAAACGGCCCTCTATTAATTTGCTCTTTCTTTCCTCAGTTTAATTCTTCTTTCGAATAAAAAATAAAAATATCATGGCTCTTCAACACATTTCAACATGTTCAAGTAATTTGTGTTAGTGGATGACCATTTAGGGGCTGCTGGCCTGGTTACCGGGAGTTTTTC…	ARS715.2	7	316400	316800	61.02	0.02	1	AAAAAATAAAA	1	316773
TTCTTATACCTCAGGTAATAATAAACTAGCAACCTGAATAATATCAAATAGACGATATGTTAAAGTTTCATTCTAACAATTACCACCCATTCCAAAATATCTATTGTTAGAGAGGCGTTAATAGAACAACACAACACAAAAATACTGAAGGTCAAAGTTTGTTGTATTACGGGCTCGAGTAATACCGGAGTGTCTTGACAATCCTAATATAAACGGTCTTAGGGAAGTAACCAGTTGTCAAAACAGTTTATCAGATTAATTCACGGAATGTTACTTATCTTATATATTATATAAAATATGAATCATATTAAGTGGTGGAAGCGCGGAATCTCGGATCTAAACTAATTGTTCAGGCATTTATACTTTTGGTAGTTCAGCTAGGGAAGGACGGGTTTTATC…	ARS715.4	7	319200	320000	61.02	0.02	3	AAAATATGAAT	1	319557
CCTGGGGTTGCAATGACGTGGGTGCGTTGGGCAGAGATACTTCCAACGCCAAGGAACAACTCAAGGACATGGACGCCGATGACTCAAGTGATGACGAAGATGGTGATTTGAACGAATTGGAATCTACGCCCGCTAAAATCCCAAGAGAGTCATTTCCTCCCTTAGCGGAGGGACACAAGGTCGTGCAATTGGCAGCTACAGACAATATGAGTTGCGCCCTGTTCAGCAATGGCGAGGTATACGCATGGGGTACTTTCCGTTGCAATGAAGGTATCCTAGGGTTTTACCAAGATAAAATTAAAATTCAAAAAACTCCATGGAAAGTGCCTACATTCTCTAAGTACAATATTGTCCAATTAGCTCCCGGTAAGGATCACATACTTTTCTTAGATGAAGAGG…	ARS715.5	7	322000	322400	61.02	0.02	1	TAAAATTAAAA	1	322394
TTCTCTGAAGATTAGCTTTGCTAATATAAACAAATCCGTTAAGTTCTTGGGAATTTCTTTGAAGGGGGGGAGGCGGAAATGTAGTGAGTTGTTTTTACTGTGATTTGCTTTTTCTTTCGCTCATGGCTTATTTTCCTTTCCTTTTCTTCCCACATTCAATAATGCAGCGTAAATATAGAACAAGATTACTTGTTTATACGAGATATACGGGCAGTGAATAAAGTGGTACTAGAACTAATTATCAAAAAGAGTAACTGTCATTCAACATTTCTGGCTCTAGACCCAATAGGACATAAACTTTTAGATTTTTGAAAAATGGCTTGGCGCAGCACGGTAATACTAGTTGGTTTTTTAAGCCTACTTTCGCCAATAAAAAAAACTACGAAACAGTTCTTACTT…	ARS715.6	7	324400	324800	61.02	0.02	1	ATAAACTTTTA	0	324387
AACAGTAGGAAGCAAAGGATGTAATTGAACAAAATCTGCGCCTCCAGATCCCATAGTTGTTCCTTTAGAAAAGGAAACAGGAGGGAGTTGACGCATTGTTCTCAAGTCGTAAACATTCACAAATGGGTCAGCGTATAAGTTATAAAATCTTTTGGACTTCCCTACTGTAACCAAGGTGTTATCCCGTAAATCCATAGCGGATATGGATGCAGAGTGTGCATTAAATGATTTGATAGTACGATTCGATGTTGGATCTAGCAAATCCACAGTCCCTGTTTGTCTTCCGATAGACAAAACTTTATTATTAGAGCACATTAACTTCACTTTAGATGAGTAATTCAAGAGGGAATCTAAGCAACCTCTGTTCAAGTCAATGGACGCAATTCCCCAATTTGTGTT…	ARS715.8	7	333600	334000	61.02	0.02	1	AAAACTTTATT	1	333952
GGTAACCTTGTTGAATGAGAAGAAGAAGAAAATAAGAGAGCTTCATGAGATTCTGCGACAAAATAATATCAAATTGTCTGACGATGATGTTTTAGATTCTGCGCTTATTAATACGGAAGTGCAAAAGCCAATTTCTGAGTTAAACTCTCCAGGAAAAAGAATGAAACGAAGAAAGACGGTAGTAGAGCCTCAAAATTTACAAAAGAAGTTGAAAGACACAAGTCGGAGGAGAGCTAATAGAAAAATATCTAATCAATCCGTGATCAAAATGGAAGACGACGATTTTGATGACTTTCAATTTTTCGGACTTTCTAAAAGGCCAATTATTACTGCTAAAGATAAACTCAGTGAAAAGTACGATGATATTACCTCTTTTGGAGATGACACACAATCAATAAG…	ARS716.0	7	344000	345200	43.9	0.04	2	TTTCAATTTTT	0	344247
AACAACAATGATAATAATAATAATAATAAAAATGATAATAATAATGATAATAATAATGATACAAGTAATAACAACAATATTAATAATAACAACAGAACCAAAAATAACATAAGAAATAACCCTGAAGAGATTATCCGGGACTGGAAACTTACCAAAAAGGAATGTTTAATTTTGACAGATATGAATGATAAGTTAAGATTGGACAATAACAATTTAAAGCTACTGAATGATGAAATGGCTTTAGAGAGAAACCAAATACTAGATTTGAACAAGAATTATGAAAACAACATAGTAAATTTGAAAAGATTAAATCACGAGTTAGAACAACAGAAGAGTTTATCTTTCGAAGAATGTCGATTACTGCGCGAACAATTAGATGGCCTATATTCCGCACAAAAT…	ARS716.2	7	348400	348800	43.9	0.04	1	TAAATTTGAAA	1	348408
ACCCAGCTCAACCGTTTGGTAATGAAGCTTTAATTTGGTTACAAAACCGAATTTTGGGAAAGAAAGTATGGGTCAAGCCTTTATCTATAGATCAGTACAACCGTTGTGTAGCTCGAGTGTCATACTGGGACTGGTTTGGTGGGTGGAAAGACTTAAGCTTAGAAATGCTCAAGGATGGATTAGCGGTTGTTTATGAGGGTAAAGTAAACACAGAATTTGATGATAGAGAAGATAAGTATCGATATTATGAATTTTTGGCAAGATCTAGAAAAAAGGGACTGTGGATCCAGAATAAATTTGAAACGCCTGGTGAATATAAAAAACGTATTTGAGTTTTCGAGAGGATTTTTATCCATCATACTGCAGATTTTCATATTATATGTTCATTAGCTTTTCACG…	ARS716.3	7	350000	350400	43.9	0.04	2	TAAATTTGAAA	1	350402
TATATATCGAAAGCAATATGCTAAGTTATTATTCTTACCCTTTCAGTGTCCTTTTTGGCACACCCACTAAACATAAAGAGAAATACGTGAACACCTATACACCCTATATTATTTTGATTGTTCAACATTGCTTGATTCATCATCCATTCTCCAGCTCTCGAATCTTGTTTCTGGCTTTTCCAAGATTATGTGAAAATTAACTTACTCTTTTTGGTCGATAAATAATTACAAGTTCAAGTGCATGTCTAATTGGAAACTTATTTTTATGTCCGATTGAGCTGATGTTCAGCTAGTTTATGTTTATACAAGAAAAATGCTCACCCGTACATATGCTCCTTCTTCACTCATTTTCTTGTCCTGTTGTTGAGACATTCAACTTTGATCCTGCTCTTGTACTTT…	ARS716.5	7	352000	353200	43.9	0.04	2	GTTTATGTTTA	0	352658
TTTGTGCTGAGAAGGTCGTAAGTGATAAATGTGTGGGTAAAAGTTTGGATTTGATAATCAAGATAGGGTCCACTTTATCTCAGTTGTCCTTTCAAGAGAAGGTTTATCCAGTTTTATTGAGTGATGCGAACTTTCCAGTATTATTAAAAAAAGCCACCATCTGCCTGATCGATAATTTAGACACATTGAAGCAAAAAGTTAAACGCTCTGATTTCTTGGAAAATATACTCAAGCCGCTATTTAATTATGTTTTACATGACTCCGAAAGTGACATTACCGTGGTTTGTCAAGAAAAACTTTTATCACAAATTCCGTTAGCTTTAGAGGTACTTGATTTTCCTACCGTGAAACAATTCTTATTACCATTACTATCCAATCTATTTACAAAGACAACAAGTT…	ARS716.6	7	354400	355600	43.9	0.04	5	AAAACTTTTAT	1	354489
TTTTGCTCTGGACGTGGCCTGTAAAGTTCTCTTTTGCGACGGCCCCCCGCTTTAACCGAGGCGAAATGACAAGTGCTTTCTGGCAAAGAAGGAATAGCCACTACAACCTGCGGTCTCCACCTTTCTCCACCGATAATCTATTTAAACACTCACTTGCCAATCAGCAAACGTCAATACATCTACATATATACGTATAGATTTTATTGCACTGTGATCAAAAAGAATGTCTCAACCGGTTCAACGCGCTGCAGCACGCTCATTCCTTCAAAAATACATCAATAAAGAAACTTTGAAATATATTTTCACAACACACTTCTGGGGTCCCGTATCAAATTTCGGTATCCCAATTGCTGCTATATATGATCTGAAAAAAGACCCTACACTAATCTCTGGCCCAAT…	ARS716.7	7	358400	358800	43.9	0.04	3	AAATATATTTT	0	358706
AAACATTCCAATTTCGCTTCCTTTGTAAGACAATTGAACATGTATGGATGGCATAAAGTTCAAGATGTCAAGTCAGGATCAATTCAAAGTAGTTCAGATGATAAGTGGCAATTTGAAAATGAAAACTTCATTAGAGGTAGAGAAGATTTGCTGGAAAAAATAATCAGGCAGAAAGGTTCCTCCAATAACCATAATAGCCCTAGTGGTAACGGTAATCCAGCGAATGGTAGCAACATCCCTCTGGACAATGCCGCAGGAAGTAATAATAGCAATAATAACATCAGTAGTAGTAATTCATTTTTTAACAATGGTCATTTATTGCAGGGTAAAACACTAAGATTAATGAACGAAGCGAATCTTGGAGATAAGAATGATGTCACCGCGATTTTGGGGGAATTA…	ARS716.9	7	369600	370000	43.9	0.04	3	ATTCATTTTTT	0	369700
GGTGGTAATGGTGTTAGACTGGATGGTGGTAACGCCTATGCAGGAACAATAATCTCACCTCATTACGACTCAATGCTGGTCAAATGCTCATGCTCCGGTTCCACCTACGAAATCGTTCGTAGAAAAATGATTCGTGCATTAATCGAGTTCAGAATTAGAGGTGTCAAGACCAACATTCCCTTCCTATTGACTCTTTTGACCAATCCAGTATTTATTGAGGGTACATACTGGACGACTTTTATTGACGACACCCCACAACTGTTCCAAATGGTTTCATCACAAAACAGAGCCCAAAAACTTTTACATTACCTCGCCGACGTGGCAGTCAATGGTTCATCTATCAAGGGTCAAATTGGCTTGCCAAAATTAAAATCAAATCCAAGTGTCCCCCATTTGCAC…	ARS717.1	7	386400	386800	42.42	0.31	2	AAAAACTTTTA	0	386641
AAAGCACTCTACGACGTTTTGGCCAAGGAAAGTGAGCATCCACCTCAATCTATTTTGCATACTGCAAAGGCCATAGAAAGTGAAATGAATAAAGTTAACAACTGTGACACCAACGAAGCCGCTTACAAAGCCAGGTATCGTATAATTTATTCAAACGTCATATCAAAGAATAACCCAGATCTCAAACATAAAATTGCCAACGGTGATATAACACCTGAATTCTTAGCTACATGCGATGCCAAGGATCTGGCACCAGCGCCCTTAAAGCAAAAGATAGAAGAAATTGCCAAGCAAAACTTATACAACGCACAGGGTGCCACCATAGAAAGGTCAGTCACCGATAGATTTACATGTGGTAAATGTAAAGAGAAGAAGGTATCTTACTATCAATTGCAAACA…	ARS718.2	7	418000	418400	32.15	0.32	1	AAAACTTATAC	1	418236
TCCTGAGAAGCCATTATAATGGCAACTACATTCATCAACACTCCATAAAATCCTATCGAGTTACACTGCTAGTGTCGCAATTGCGCTTTTCTGCTGCTTAATTGTGGGCCCCAAGCTCTTATCACTTGCTACCATCCTATAAACTGTATGGAATGCCATCACAACTTTCGGAAAAATAAAGCGCTTTTTTACGCTATCAGTGGAGATATTACGAATTAGGCACAGGGAAGAAATAGATAAAAAATTCATGGGGCCAACCCCAGACGTCAATCTTCTACACGTCAAGTTTTGAAAAAAATTAAATAAAAAATAAAAAAAAAAACCGGCGCGAAGGAAACGTGCTGGCTCGCTAACTTCTAGTCTTACTGTACTGACTACCTTCCAGTCCTACTGGTTATA…	ARS718.6	7	433600	434000	32.15	0.32	3	AAAAAATTAAA	1	433840
CTTAGGGCCGCATTTCTTGCATCCGGTATTGGTCCGTTCACTACCATACCAATTGTTCTTGAAATACAAAAAATATACGAAACAGTAGTTGGATCCAACAGTTTATCAGGGACCTTTTTCTGACTTATCACCACTGTACAATCTTTACCTCTGACCGCTAGTGAGTTTATGTTAGTTTGATTAGTCGCTTTAAAGGCATATTCTACTTGATATAAACGACCCTCGGGGGAAAAGATAGTGATGTGCCTGTCATAACCAGCAGCAGATGCAGCAGCAGCACCCGACATGATTGTAATATGTTTTTTTCGCTTTGCTTCGTCTCTGCCCTTATATGATTTAGCATGAAGATTATAATGAGTTAGCCATTTAACTTACTCTATCCTTACGGTGGCAAATTGG…	ARS719.0	7	475200	475600	30.96	0.19	2	TAATATGTTTT	0	475256
CAACCAGCTTCTCTCCATTCAAAACCAGCTTCTTGGAAAATCTTGTCCAAACCTTCTGCTTCGGCTTGTTTTTTGACCAAACCAGATCCCGGAACAACCATAGCTAATTTGATGTTACTAGCCAATTTTTGACCCCTAACTACAGCTGCAGCACTTCTTAAATCTTCAATACGGCCATTGGTACAAGATCCAATAAAGACTTTATCTACTTTGATGCTCTTTAGCGGTGTGTTAGGTTCCAAACCCATATAGGCTAAGGCTCTTTCCATACCAGATTTCTTTATTGGGTCTGTAACATTTTTTGGATCTGGTACGGAACCAGTAATTGGTAAGGCATCTTGAGGAGAAGTACCCCATGTAATAGTTGGAATCACGTCGACAGCTTCAATGTTGATTTCG…	ARS719.1	7	477200	477600	30.96	0.19	1	TAACATTTTTT	0	477686
CTTCAATCATCGAATACTACGTCTTAATATGATGTACTGTGGTTCATATTTTCAAGTAGTGTTAGTAAATTTGTATACGTTCATGTAAGTGTGTATCTTGAGTGTCTGTATGGGCGCATAAACGTAAGCGAGACTTCCAAATGGAGCAAACGAGAAGAGATCTTTAAAGTATTATAGAAGAGCTGGGCAGGAACTATTATGACGTAAAGCCTTGACCATAATAAAGACGATTCTTTGTCCCTCTATACAAACATCTTGCAAAGATACCAAATATTTTCAAATCCTACTCAATAAAAAATTAATGAATAAATTAGTGTGTGTGCATTATATATATTAAAAATTAAGAATTAGACTAAATAAAGTGTTTCTAAAAAAATATTAAAGTTGAAATGTGCGTGT…	ARS719.2	7	479200	479600	30.96	0.19	9	AAAAAATTAAT	1	479398
GTCTAGCTTCACCGGCGGCAACTGGACCATCGTTATCACTGTCTTCGTCGTCGACACCGTGATTAGATTGTAGTTCTTCGATTAAAGCATCGATATCGTCATCGTCAGAAGATTCAGATGCAGCGTCATCGTAAGTCTTAGCAGGCTTTTCTTGAGTTGGCTGATGAGCTGAAACAGAAGATGCTGAAGAGGATGATGAAGAGGATGATGTATCAGTCATATTGATATTGTTTGATAATTAAATCTTTCTTATCTTCTTATTCTTTTCAATGATTTTCTTTAACTAGCTGGGGTATATTTTTTTTCTTTCTTTTGAATGTGTGTATAAAAGAGAGAAAAAATGGTTATTTTCCAATTAATTAATTATTAACGATTGTTAAAGAAAAAATTTATCAACGA…	ARS719.5	7	482400	482800	30.96	0.19	6	GTATATTTTTT	0	482742
TGTTTTTTCCCCGTCAGCGATGGTGACGTAAACGACTTTTTGCACTTTAGCAAAGCTGAGTTAATCTCGGAAAATCTCTGTGTCCTTCCTTTTTCTTCTAGCTTCCGTTCCGAGTCTCATCTTCTTTCCCGTGCCGTCGGGTTTAGTAAAGAAATGTAAAGAAAAAATGTCGTATCGTACCCGAGAAATATTTCAATTCTCTTACGTATGCGATAGCAGTTGGAAAGATCTGATTCGTTACGATGACTTGATAAGCGCGGGCTTTTTCGCCCTATACGGCTTGGGCCTGACTAAAATGTGATTCTGTGTTTTACGTATATGCGCGTATATAGAGCAATTGATTGACTTATTACGCAGTTTATCAAGATAAATTCTTTGTTCTTGCTTACGGGAGTGTGG…	ARS719.6	7	483600	484000	30.96	0.19	1	AAAATGTGATT	1	483902
TTCTAGCAATTATTACCAAAATAAATTGCAGGCTTAACGAAAAATTAAATAATCTCTTCAGATTTTTTCACTTCCCCAAACTACATTTTAGTCAGGTTGGCACGATTCAATTGAGAAGGCTTAGGTTAAGAATAAACATTTTTTCATAAATTTGAGGAAGAAGGGGCTTTTCTGGTAATTTTCATTCAATAGAAAGGCTTAAGAAAACGTCAAAAAACTCATGCGCCTCCAGTAAAAACTAAGTGTATTAAGAGAATTGTATCACATATATACGACATTGAATTAAAGAAATAAAACTTGAACAAATAAAGTTTAGAAAAGTGGTTCTAAAAAAAAAAAACTGTGTGCGTAACAAAAAAAATAATGTCTAGACAAGACGAAAATTCTGCTTTACTAGCG…	ARS719.7	7	485600	486000	30.96	0.19	6	AAAACTTGAAC	1	485852
ATACAAATATCTGATGTTTCAATGTCTCCTTCTCTATAATGAGTGCATGCCCCATATGGACAACAACGTTCACACTGGTCGGTGCAAGGGCACACAGCAATCTCAGAGTTTCTTTCATTGGCTGCATGGAGCACAAATTCAATCTTGTGCTTTAAAGTATCTGCGCGGTTATGGCAAGTTCTCCATCAGTCTCTTATTCCAGCAAGCATTCTTTTACGGAACTTCAATGCATCTAAATACATATGTACAGATAGCCAAAACTAATAGAGACATAATAAATTAAACAAAACTGTAAATTTTAAAAAGAGTATATATAGGGCTCAAGAAACTGCGTAAATATAAAATTAATGAAGAAAATCTGATTGTCAACTAAACGACATCTTCCATTTCTATTTCATC…	ARS720.1	7	504000	505200	33.21	0.32	2	TAAATTTTAAA	1	504582
ATGTTTGATCGTGGAAAGGACTGGTTCTGATGTTAGGTCCTTCTTGCTTTCCCATGATATCATGTATGAACACAGAAGAAATATCCTTATTATCAAACAACTTATTTACAATGATATTTCCTCTACGAAAGTGCGGCTTTTCATCAGACGTGGAATGTCAGTTCAATATCTTCTTCCAAACTCTGTCATCCGTTACATCCAAGAGTATAATCTATACATTAATCAAAGTGAACCGGTCAAGCAGGTCTTGGATAGCAAAGAGTGAGTTTATTACAACTCTGATACTGCAGCAGTTCAAATTTACCACTTTCCTCTTCAAGGTGCATAGAAAAAAAGTTCCTGGATGCACGATTTAAAATGTTTACAGCAGAGCAACAATCATGTGAACAATGTCAAACA…	ARS720.5	7	512400	512800	33.21	0.32	3	GTTCAAATTTA	0	512762
GAACCAGAGCAAACAGGCCCTTTTAAATGAGCTAAGGGAGACTTTCGACGAGGACGGGGAAACGATAGCTGATAGACTGTGGAGTCGTAAAGAATTTCGCTTGGGGACCTGAAACAGAAGGGCCTTGGCGCGCGTCCCAAAAGGGAAAGGCTCGCTCTGAAACAGGCGAAGACACGAAAACAAATTACCGTTTCGGGGCGTTTTGCAGCAAGTGGCTAGACACGTCGGGCGTTGCCAGATCAAAATAGCACCAGTGGGTGTTTTTTTACTATCTCATCTTCGTGCTGATATATATAACTTTTATACATTTCCATAGTACCAAGTTCTTTATTTCCTGCATTTTTACATTTATAATAGATTACCAAAACTATTCGACCTCACCAAGGGACCCCATAATAT…	ARS720.6	7	516400	516800	33.21	0.32	3	TATAACTTTTA	0	516599
TTTAGAGTTTTAGTCTTCCTTCTTTTGCTTCACACAGTGAAATGATGTACATAACGTACTTGCTTCCGAGACAGACCAATTGATCCAAGCTAGCTATATATATGGCGGTCATTGGGGAGTTGGCCTGGAGCTGTTGAGTTTGCGGACGTGTCAGAGAGCGCGTAGGGCCGCCAGCGCCACCTGTCTTCAGGCACCAAGGCCGTAATCTCTTCCGACGGTCATTTTTTAATGGAATGTTTCAATACGAGAGTTTGTGGCATGTAGTTTAGGAACGGATTATAGAGAATAGTCGAAATATGTTTAGTCCCTACACAAATTGCTAGACTACCTGTTTCGAGTTTCCTCTATTCCTTTGCTAACGGAGCTGCGGTATATAAACCATCGTAGACTCAAAGCCGT…	ARS721.1	7	560400	560800	14.28	0.1	1	AAATATGTTTA	0	560316
ATTTTTTTTTCTTTTCCTCTTTTCCACTGGATCAGATCAAAAGCCGACTAAAAATTTGGCAATTTAAAGAAAGCATCTTTTAAAGATAGAAAAGGTTATTTCAACAAAAAAGTATCTTTTCTTCACTTTTCTTTCAACAATTCAAAGATGGCTAGAACCATAACTTTTGATATCCCTTCCCAATATAAACTCGTAGATTTAATAGGTGAGGGAGCGTACGGAACAGTATGTTCAGCAATTCATAAGCCTTCCGGCATAAAGGTAGCTATCAAGAAAATACAACCGTTTAGCAAAAAATTGTTTGTTACAAGAACTATACGTGAGATCAAGCTTTTACGGTATTTCCATGAACACGAAAACATAATAAGTATATTGGATAAAGTAAGGCCAGTATCCATA…	ARS722.0	7	575200	575600	36.98	0.15	2	AAAAATTGTTT	1	575545
CAAAGAGGCGATATCAACACCTTTTATCCAGCACTATTCAACAGTGAATGGGCTCCCAAGTAAGTCTTGGCATTGTGCTTTCTATTCTTAAGTATTAAGTAGAAGTTTTGTTTACTGGGTTTGTTTATTCCTGGCTAGATGTTCGCATTCGTTTTCTAGTTGACCATATTTACCAAATATTCACAACTAATACCCAGCCAAGGTAGTCTAAAAGCTAATTTCTCTAAAAGGGAGAAAGTTGGTGATTTTTTATCTCGCATTATTATATATGCAAGAATAGTTAAGGTATAGTTATAAAGTTTTATCTTAATTGCCACATACGTACATTGACACGTAGAAGGACTCCATTATTTTTTTCATTCTAGCATACTATTATTCCTTGTAACGTCCCAGAGTATT…	ARS722.1	7	576800	577200	36.98	0.15	1	TATAAAGTTTT	0	577095
CTTATATGCATGTTATTTGCTCTTATAATTGGTCTCTATTTAGGGAAAAAAGTCGGTTTGAGAGCTTCTCGCGATGTGAAATCTCAATTTGAACTGCACGCCAAAGCTAGCCCATTTCACGAACACCAGAAAGAAGAAATCCCCAAGGATCGCATGACAGAGTATGCTCTCTCATATCGTTGAGTATGAATGCCAATACACTGATCAGCTTTACAAGAAACGTAAAATCTGGCACGATGGTAGACTGAAATACTTTCAGTTAAACAACAGATTCATGCTTTATACGGAAAAGGATAACGTTTTGTTAGCTAGTGAATTTAAAATAAATTCAAAAGAGCTGAAAGCAATTCTAAATCCAGAAGGTTTTGATATTGAAGAACATAGGATTTTTAGTCAGTT…	ARS722.3	7	579600	580800	36.98	0.15	3	GATAACGTTTT	0	579607
TAGTAAACAGTCCTCAGTGCTGGAAGGCAGGCTGGAAGGCAGGCTGGAATCCCCCTCTAAGGGTGATGCCGAATATTCTTTCATGTTTTGCCCGAAATCGTGCCAATGATAAATCGGTTGCACCTCTTGTAAAACCTCTCTGTTCCAAGACCCCTTGGCGATGGCACTGTTTTGTCCATAACACGGTGACATAAGTGCTGAAAATCCCAACTTCTAGTAAAGAATTAACAAATTCAACTGTATGACTTATAGGATAAGAACAATGTCAGTTCCAATGCGTTGACACAGTAGAAAATATATTTACTAAGAAGCAGCTTCGTCGTTGGTATAGTTTCGGTTGATCTAGATATAAATATAACTACAAATAAATGGCAGGAAAAATTGAAGCAAATGACACAG…	ARS722.4	7	584000	584400	36.98	0.15	2	AAATATATTTA	0	583995
GAAAGACCAAACTACCTTTTGTGCGGACTTGGTGTCGCCCCATTATCTGCAGCCTACCTATACTTAGTATCACTGTTCAATCACAAGCTAGCCCCAAAATGCACACGTGACCAAAATGATTTAGAAAAGCAAAAGGATGAAAAATTACCCCAACATCACCCGGAAGTCAAAGATGGGGAAGCTGCATGCCCATTCTCAAAGATGAACAACGCCAAAACATTAAAACCTGAATCCGAAAGAAGCGTAAAATGTCACTCATACATGTCATTGCACATGAGCATTGTAACCGGTATAACAATTTTTACCTTTGGTAAGTGTATCCTAGATGGATTCAAAGCATGAACGACGAAGCACGTGACACGTTCCCTTCAAACATCACAATTATTTAAGCGAGACTAA…	ARS724.5.0	7	591600	592000	34.25	0.03	4	TAACAATTTTT	0	591830
TCTTCAAAATTGATTTTAGCTGCTGACTTCTTCGATATTGTGTTTGGCGGCCAAGCCAAGAGAGCAGCAGCCGCACTGGTCGGGTTGAGTGCCTTAGGAAATGTTCTTTCTGTCATTTTTTCTCAGGGTAGAATTATTCAACAACTAGGACGTGAAGGTGTGTTGCCCTTTTCTAATTTCTTTGCCTCTTCTAAGCCATTCAACTCCCCAATGGTTGGTTTGTTTCAACATTTTATTGTTTGTACAGTAACCATTTTAGCCCCACCTCCAGGTGATGCATATTTGCTAGTCCAAAATTTAATTTCCTACCCAATGAATATTATTAATTTTGCCATTAGCGCGGGTTTGCTTTGGATATACTGGCAACGTAGACAAGGTAAAATTGAATGGAACCCACCA…	ARS724.5.3	7	600400	600800	34.25	0.03	2	AAAATTTAATT	1	600668
TTGGGTTGGGATAATCAACGCATTGTACCCAAACGACGGGAAACAAGGAAGGATGCAGAATGAGCACTTGTTATTTATAAAAAGACACGGGAGGGGGAATCCCGTCTTTCGTCCGTCGGAGCCAAAGAGATGAGCCAAAGCAGAAAAACAGGGGACGCCGCCCTTCTTCCGTCCCGTGCGTGAGGGGGGCGCGGCCATTCGGTTTTTGCAATATGACCTGTGGGCCAAAAATCGAAAAAAAAAAAAATAAGAGGCGGCTGCGGAATTTTATAAGACAAGCGCAGGGCCAAAGAAAAAATAATAATTGACGTGGCTGAACAACAGTCTCTCCCCACCCCTTTCCAAAAAGGGGAATGAAATACGAGTTCTTTTTCCCAATTGGTAAATATTCAACAAGAG…	ARS726.0	7	650800	651200	37.01	0.2	1	AAAAAATAATA	1	651018
GAAAAAGTATAGTTCACTTCACCCTCTGGCTGCAGGCTAGCCTAGCCGATAATGCCCCCGACTCCCTCAACAGGTAGAATTTGTAAGGATTCGACGTAGCCTGGACACATTGTGCATTTATCGTATCCCCTACTGCTACACGTATAAGAAGTCGTTGCTTTACCTCTATTCCAGAACTCAATCTTGTCGTTACTTGCCCTTATTAAAAAAATCCTTCTCTTGTCTCATGCCAATAAGATCAATCAGCTCAGCTTCACAAATGAACGTGTTCGGTAAAAAAGAAGAAAAGCAAGAAAAAGTTTACTCTCTACAAAACGGTTTTCCGTACTCTCATCACCCATACGCTTCTCAATACTCAAGACCAGACGGCCCTATCTTACTGCAAGACTTCCATCTGCT…	ARS726.3	7	654400	654800	37.01	0.2	2	GAAAAAGTTTA	0	654669
TTATCTTGTTGGATCTACTATTCACGACGAGTTCTTGAAAAAATATCAATCGAGAAGATTTTTAAAGGCTTCCATAATTTCTATCGAATGGGCATTGAAGGTAAGGAAAAATGGATATGATATTATGACATTGCATGAGTGAAGGTGCTAGCCTACACAGAAAACCAAAATCTCACTTCCTTACTTTATCATCTATTTTATAGAAAAATCAGGCATTCATTATTCATATAACGGTTATCTCATATATATTATCACACGGTATCAGTTTTGTAGGCTGTAATAATTAATTCATTTATAAATTTTTTCTCCCATAATTGGAAAATTATCTTTAAAGTGAGGAATAATGCATTTTCTTTCTTTTTTTGAATACATAAAAGAAATAAAGAAGTATGTCTATCG…	ARS728.1	7	704800	705200	30.21	0.04	4	TTATAAATTTT	0	705204
TATTCAATTTAACAACATTTTGTGATAAAAATCGATCTAGCAGGTTGATCGCTAAAAATAATGTTTCAGGTAAGCAGTGAAATTTCTCATGAACTTCAACCAACCAGTCAATTAACAGCGCCCTCATGGAGCTTTTCAAATGATAGGGAGATTGCGTGTCCATTAAATAGTTATGTGTCGGTAGCATTTGGATTTCCTTCTCGTAAAGATGAGAAAATATAGAATCTGTATATTCTGCTACCATGAATGGATCATCCATCTCTATCGAATCCAAATTTTTCCATTGATGACATTTTATTTTTTTCACAGTTTTTGGCTCTATAGGATCGGTTGAATCATTTGATAATTGTCTCTTTCTTGTTTTTTCCAAATGGGTGGAATCTCTTTGCAATTTACCTC…	ARS728.2	7	706000	706400	30.21	0.04	1	TTTTATTTTTT	0	706207
AAGCATTTTCCTTGCCTATACAATCTTCATTATTAATTTGGATTTTCCTTTCACTAATTGGACTAGGGATACAATTCATTTTAAAAATTTAAAAGGAGGGAGAGAATATCAGAGAATAATAATTTTCAACACACTGATTTGTATGTTGTATGAACGCTAGATTAGTGAAGCTTGTTATTATTTAATAAAAGATAAAAGTCACTTGTATGAAATGAAGCAGTTATATATATGTTAATAAGAAAAAGGCAAAAACTTAACCCTAGCAAAAAAGGTAATCAATGTGCTAAAACGGTAAATATTTAAACGCAGGTTGCGAATTGCCAATTGCCAATTGTAGGATACACAGGGAGAGTAGAAACAACCAAGTCCTGTGTCCTGTGGTAGACCCACTTGTTTTAC…	ARS728.3	7	706800	707200	30.21	0.04	2	TAAATATTTAA	1	706717
GGTCACGTGACTAAAACCACGCGTTTGAATAATAATACCAACAGTAAACTGAGAAGAAAGTCCATCTTACATACAATCAGAAATAGCATTGCTTCCGGCGCTGATTTACCCATCGAAAACGACAATGTTGTTAATTTGGGAGATCTGCATCCAAATAATCGAATATCACTCGGAAGTGGTGCTGCAAGAGTGGTCAATGGGCCCGTTACGAAGAACAGAAATTCAATGTTCTCAGGACGTGCTGAAAGGAAACCCACAGAAAGCAGACATTCTGTTGCAAAGAAAACTGAAAAAAAAATAAATACAAGGCCCCCCTTCAGATGACTACGCCCAACCCAACCAAAGAATTATCCTCCTCACAAAATATATCGCTAGCATGCGTGAGTTATGGATAAGAAG…	ARS728.7	7	719600	720000	30.21	0.04	1	AAAAAATAAAT	1	719895
TCGATGAAGAAACTGGTGCTATAAAAAGCACCAAGAAAAAGATATCTCTACAAGACATTTATGATTTAGAGGATTTGAAAAAAAACTTGATGACTGAAGGAGACATGAAAATTAGAAAGACAGATATTCCAGAAAGATATCAAGAATTAAGAGCAGGTATTACTGACTACGGAAATATGTCATCGGAGGATCAAGAATTAGAAAGAAACTGGATAGCAGAAAAAATTTCTGTGGATAAGAACTTCGATGCCAATTATGATCTCACTGAATTTAAAGAAGCAATTGGGAACGCAATCAAATTTATCACCAAAGAAAACTTGGAAGTCCCTTTTATATATGCTTACCGTCGTAACTATATTTCCTCAAGAGAAAAAGATGGGTTTCTTTTGACTGAAGATG…	ARS728.8	7	721200	721600	30.21	0.04	1	AATCAAATTTA	0	721541
ACTGTTCGCCATAAGTTTATGACAAAATTAGACCAGGCTCCATTCATTCCTAATGTCAGGGATCCAAAAATTCCAAAAATCTTATCTTTAACCTGTGGACAGGGTAGATTCGGAGCCGACGCTATAATTGCTGTCTACGTCAACAGAAAGGGTGATTTTATAAGAGATTACAAGATTGTCGACAATCCATTTGATAAGACGAATCCTGAAAAATTTGAAGACACCTTGGATAATATCATTCAAAGCTGTCAACCGAATGCCATCGGAATCAATGGCCCTAACCCAAAGACTCAAAAATTTTACAAAAGATTACAAGAAGTTCTACATAAGAAGCAAATCGTCGACAGTAGAGGACATACTATTCCAATCATTTACGTTGAGGACGAAGTCGCTATCCGT…	ARS728.9	7	722400	722800	30.21	0.04	1	AAAAATTTTAC	1	722872
GTGGTCAAGTTTATTGAAGACTACTCTAGAGTGAATCCAAATAAGTCTGTGTACTATTTCAGTTTGAACCACGATAACCCTGGTTGGTTTTACTTGATGTTCAAGATTAACGCAAATAGCAAATTATACACATGGAATGTGAAATTAACGAACACTGGTTATTTCCTGGTAAACTACAATTATCCAAGTGTTATCCAGCTTTGTAATGGTTTTAAGACGCTTCTAAAATCTAACAGTAGTAAGAATAGAATGAACAACTACCGTTAGATGCGTATGTAGTGTCCATTGTTATTATTAATTTTATTATTACTTTGACCATTGTTTAGGTAAGGTATGTAAACTAGAACGCTTCAACTGTATTTTTTACGTAATTATTTGCTGCATGTTTAGTTTCGCAAA…	ARS728.10	7	724400	724800	30.21	0.04	1	TATTAATTTTA	0	724792
GGCACCAAGACATTATGTCCCTCGGGAGGAGAAGGGCGCACGCGTCAGGCTTCCACGACGTCCGCCGTGCATGCGCTCTCGCATTTTTAAGGTTTAGTGCGGCAGGCGACTGCGCTGCGGCCAGCCCGTGAGACCACCCGAGGGAATTTGAGTAAGCGCGCCCATTGCGGGGTTTTTGCGGTTTGCGCTGTTTTCCGCACGAGGTTTCTCCGGACACAGTTAAGCAGTATATTTCACTCGGAAGCGCCGGAAAATTTTTTTAAGCGCAAATATATTCAGGTAAGCAGCAAAAAAATACTTTTTCCGGTGGCCCGTGATGTGTTTGTAACAGCTTCTGCGGTACTTTGGGCGGCTAAATGGCAAATAGATCAGGGGAAGGGTTTTTGCATAGGTACAAAA…	ARS729.0	7	766400	766800	32.37	0.1	4	AAATACTTTTT	0	766510
CTTTCGCACCGTCTGTGGTTGTAAAGTTACTGACACTTTTTTTTCTAGAAAGTTCCGGAAAATTGCGACACTCGGTGGAGCTCGAGAGTTGTATCCAGTTTTCTTGTTCGGCGATATTCCGAACCAGGTCGGGTTGGGCTAACAGCCGCCCAGGATGGAAGAATTAAGAATTTCATAGAAGCCTTCAGTTCTTGGCGAAGTAAAGTGGCAAAACAAATGGAAGATCTATTGCATTACATATATAAAAGCATTAGAACAATCTTTTCTCATTGACAGGTATTCTCATTGCTCTATATATATTTTCTTCTTCTTGAAAGAAATATCAGTATTACAATCATAACAACAACCAAAAGAAAATAACTAATAGACCCCATTACAATATAGAAATGTTTTCCATAT…	ARS729.2	7	772400	772800	32.37	0.1	1	ATATATATTTT	0	772363
AATTATCTCAAAATTCACCAATATCTCAATTCCATCTTTAGAAAAATTAAGTTCAAATTAACGGAAACAGTAATCAAGTAAAAGAGCTTTTTTTTTCTTCTCCCCTTCCTGCCCTGAAGATAATTGAGTAAATGTTACGTTGAGAATGGCTTTTTGATATTTCATTAGATTTACTTCATTATTCTTCTCTATTCTCCCCTTTCATCAATTAATTGGGCGTGTGGCGTAGTCGGTAGCGCGCTCCCTTAGCATGGGAGAGGTCTCCGGTTCGATTCCGGACTCGTCCAAATTTTTTTACTTTTAATGAGGTATACTGGAATATTACGGCTCTTTTTTTTTAGAAACATATTCCTCAAATGGGTAAACGGACCCTGGTGCAAGGTGTGGGTGCTGAGACAA…	ARS729.3	7	774400	774800	32.37	0.1	1	TTTTACTTTTA	0	774430
GTATCTGATAGCAATTTGTCGACAAGGTGGAGAGTTTTTGAAGTTTTTTTTTGTAACAGTTATGTTACACTATTTACCAGAGAAACACCAAGACAGGAGCCCTCAGAAGCTTTCGTGTTGTCAGAACATAAATATCTTCTATATGTTTTAATCTTTTATATTAATCAATATTTTATGTTAAATCATATTATTATTCGTTAATGGTTAACTTGCGCTATTTCAAAATTGGAAGGATAGTGTGGTTACAAGCGGTGTTTTTGATGTATGTTTACTGCTAAGAGTATACCGTCCTGTTTACTTTTTTACCTTTTGTTCCGTTATTGATTTTTCGCAGCAAGGTTGAAGCTTCAAATTTGAAAATGAAATTAAGACGTAGAGATGAAAAACAGCGATGAAATT…	ARS729.5	7	777600	778000	32.37	0.1	1	GTTTACTTTTT	0	778011
CCATTTGGTGCTTTCTGCGCCAAGAGAATCGTCGACATTGATCAAAACCAAAAATTGGGCGGTATGAAGGGTCTGGACATGAACCATGCCGAACACGATGTCGTTATTCACTCTGGTGCATACGCCGGTGTTGACAACATGTACTTTGCTGGTATGGAAGTTGCTGAACTGGATGGATTAAACCGTATGGGTCCAACTTTTGGAGCTATGGCTTTGAGTGGTGTTCATGCTGCTGAGCAAATTTTGAAACACTTTGCTGCTTAGGCTTTTAATGAGGTATGCTTTTAAAGATTTATATATTTTTTATACACGCTATATACACAATTTTCGCTGATGATTTTGTTTTATTATTGATTTTTAAATTAACCGTAGAAAATACTAAGTGGAAAGATCCGATAG…	ARS729.6	7	781200	781600	32.37	0.1	5	TTATATATTTT	0	781411
CAGGCGTCATGATAATTCATCGGATGAAGAAGGTATTGAAGAAAATGGTAATAAGAAGGACAATGGTAGGTCGAAGCCCAGATTCGAAAATAGAAGAAGAGCTAGCAAAAATGCGTTCCGTGGTATGTAGTTATATTAGAAATTGATATTTTAATTATCCTTTCACCTTAAACTAAAAATATTATATGTATGAAGACGAAGACAGCAAAAAGTATGCGTGATACAGTTTACATTATAGAATTCTTTCCCCAAATATTGAGGGTTTTGTTTTTTTTTTTTAATGCAGATGTACGTACATATTTTCTTTATCAAAAGGATGTGTAGAGAACTATGTATATATGTATATGTGTAGGTTTTTTTTTTTTAGGATGACTAGAAAAGGAAATCGAAAAAGAAAAA…	ARS729.7	7	784000	784000	32.37	0.1	3	GTACATATTTT	0	784056
TTTTGTTGACCACCCAAAAATTTAAACGCCTATAATTTAGTTAATCAATATAGGTTACCTGTAAATATTGGTAATATCAACTCCCACTACTACTGTTTCTGGCTAGATGTCAACTGCGCAAGAGCAATCAGGCCAAACGGGAACTCCCGTCAACCCATGGCTGGAGTTCCCTCAACGGGAACCTCTACATTCTCCTACAGAGGCGCAGGCTCACGGTAAGGAACCCCCGGTAGTGTTGCGCGCTCAACGACGCGAAAGCCTTAATTGCCGCAGTACAGAGTATAAAGTTTTTAAAAATTGAAAATTAGTGATTGGGTTTAGAGTATGCACGGATGTTGTAAGGAATATTGTTTGGCAAAGTTTCACATAACGAGATATATGCTATTTTCAAACAAATAA…	ARS729.9	7	788400	788800	32.37	0.1	2	AAAAATTGAAA	1	788501
ACGAGACTTTATATAGAATGTTTCCCGTCTTCGACTCAGATGCCTCTTTTAAACGGGAGAATTTAAGCGAAATTCCTGTTCCGCAAAAGACTTTGGCGTCAAGATTCCTCACCATTGCAGAGTCAGAACCTTTTGGGCCTGTTGATGCAGCCCATGTTTTAGAATTAGAGCCTGCTGTAGAGACCTTAAGGAATTTGTCTACTGTGGGGGAACATTCTAGTGGCCATCAACAATCCACTAATAAGAATACGAAGGTTATATATGGTGAGCTTGTCGAAGGTGAAAGATCACAATATAAATTTACTAACGCAAAGGTTGGAAAAGTGGGATACCGTTACGGTAGCGGAAATAGGGATAACAAGAAAGACAGAAGAATTGGCTTTAATAAACTGGGCCAAA…	ARS731.3	7	829600	830000	32.15	0.08	1	ATATAAATTTA	0	830036
ATATGGGCCAATCATTATGGTTCTTGACCCCAAGGTATTGAGAAAAGTTCCTGACTTCGTGGCCGCCGACATTCTTATTTGATTTCGTCCCTGAAGTAAAAAAGAATTTTAATGTTCTGTGATATACTGCCAAAACTGTGAAAATGGCATTGATTGTGAAGAAATCTATTAAAAATGGCCTATGGTCAAAAAGCACACGGAATGGTAACGAACTCCTGTCCAGTTTGGCAAATAATACAATAATCGCTAAACACACAAGAATTTGCTGGAATTTTATTAATGTACCCTGGGAAAAATTTTTTTTTTTCAACCATTGTGTTAATTTTGCGATCTTTAATTTGGAGGCTATAGCTTCCACAAGAAAGTGTGCGATAATCCACGAAGGTACCTCACCCTTGG…	ARS731.4	7	834000	834400	32.15	0.08	4	AAAATTTTTTT	1	834033
GATTATGGTAGTCATGAGATGATCTGGTACCAGCGGCACACCATCTCGGATCAACCTATATGTGCCTTTCCTTATTTGGTCCAAATAATAAGCTCTTGGGCGAAGTTTAAATTCACTAACGAGAACGTCTATTAGTAACTTACCCAACCAGCGCCCCTTCACGAACGCTGATCTTCTGTTATAATAGGGCCGTACCTTTCTCAGTCCATTCTGTGTATATACCTCAATAACTTTGATAGTTGACATACTTGACAATCATCCTTTTGCCCACTGATTGTCTCGAGCAATCGTCAATAAAGTTTTCACAAGAAACATTTATTTGCCTTTTAATGAAAGAAAAAAAGTAAATTTTTCATTAACTTTTATCATTGTTATCAATCTTCTTGTATGACAGCAAGC…	ARS731.5	7	835600	836800	32.15	0.08	13	AATAAAGTTTT	0	835953
CAGATCATCCAAATGTGCCAGACATAAATGTGCATGACATCGACGAAGATACCCGTATCAGTCTATCTTCAATGATAACAGCTTTAGATGAATATGATATCGTAGAACCAGAAGATGTTGCAAAATTACCTGCAGTGTCGGAAAATGACATAACATCAGTGGATGACGAAGAATCTGAAAACCAACAGGAAAGTGATGAGGAGTTTGATATATATAATGAGGATGAGCGTGAAGATTCTGATTTTCAATCAAAAGAATACATTGGGAGTCGGCTTTTACACCTGCAAAGGGGTAAACATAATAAATCATATGCAAATTACTTATACAGAAGAGCAAAAAGTAACTTTTTTATATCGAAAAAGGAACATGCGATGGGGGTAGTATTTATGCATATTGGGG…	ARS731.6	7	837600	838800	32.15	0.08	1	TAAACATAATA	1	838542
ACATTTTCATTCCATTGCAGAGCCAGTGTCCATGAACAACAATTTGTCTTGGTAAAGGCAGTCCAGCAGCCAGTAAAAAAGAAGGCCAATATACGGTATGGAATTTCGCGATATCCTTTCCTATCACGTGAATGGTGTTTCGCTGCACTTCTTTTGGGTATGGTATTAACAATTGGCCTTTTACGTTTGATTTGTCGCTATAATGTCTTGAAACTACTTCAGTAGCATTACTCAAGATGGACGGTATGCCACCGATGGAGGAGAGGTAGTTACACAAGGCATCAAACCACACATAAACTTTTTGGGACGGATCATTAGGAGTCGGTATACCCCATTTAAGTCTCGCAGAGGGTCTCGATATCGATAAATCTGGCAATGTCCCACCGGTTTCTAGTTCTT…	ARS731.7	7	841600	842000	32.15	0.08	1	ATAAACTTTTT	0	841820
GGATCAGCAAGCTTAACGTCCAGCTTCAAGGAACGCACTAAACCTCTTGGCACAATGGTCCTAATCAACTTTCTCTCCTTCAAATCAGTAAACAGTGTTCCGTCAGACATTTGTAGTTTTCTACACAAAGATGCCGAAATCAATGATGAGCAAGTATCGAGTTCGCTTCGCACTGCTACATCTAGGCTTTTATAAGGGGTGGTATCGTTTAAAGGTGCGGCTATTAAAAGGGATGAATACGTGGGAAACGGTTGCATTACAGGAAAAACAGCTTTTTATCTTATTATATCTTTAAATATGTACATACGCTTGTTTATACGTGGAGGCGACAAAAAGGGTTGGTTGAAGGGAGAGAGAAAGAGACGCACAGAGATTGGAGGAGGGGCTCAGTTCGCTGAT…	ARS732.0	7	903200	903600	27.21	0.06	1	TAAATATGTAC	1	903383
TTCTTACACTGTTCCAGTTGCTTCATGTGGCCAAGATGGAAAAGATCAAAAACACCATCTGCATATATCCTGATGGGTCTATCCGTTGGAGGCAAATTGAATCTGAAACCTTTAGGACGATACTTGCGCAGTTCCTTGGGCAACTCGTTGGTGTAACGAGCCTCCTTCTCTTCAAACTCCTTCGTCAACCGGCGACGCTTGCGGGGAGTGAGCTGTGTGTCCTTATTTTCATCCTGGTTCTTACTCTCATCCTTATCCTCATTGTCCTGCTCTTCCGTTTCCTCACGCTGTCTTTTATTTTTATTTTTTTTAAATAGGTTTGATAGCGATGAGTTAGAAAGCTTAGCCCTAATCGAGGACTTCCCTGTTGTTGGGTTTGCCATTTTTCTTTGTGTCTGC…	ARS732.1	7	904400	904800	27.21	0.06	2	TTTTATTTTTA	0	904661
TCGTAGACGGACAGTGCAAGAGTGAAACCCTTCTGCAACTATGTAATGACTACAATGTTCCAGTTGAAGCAAGTTGTATGGTGGGTGACGGTGGTAACGACCTGCCAGCCATGGCTACCGCCGGGTTTGGGATCGCATGGAACGCCAAGCCAAAGGTGCAGAAAGCTGCACCTTGTAAGTTGAATACCAAGAGCATGACTGACATTTTATACATTCTTGGTTACACCGATGATGAAATATACAATAGACAATGAAGAAAATAATGATAGATAGATGTAATAGAGTTTCTTTTTAAAATTGTTTATTTAAACTGGTAAACATGATGTACTTTACGTAGCGTTAATATACCGGCAACTATACGTTGGAAGCAATAGCTTGCTTGATAGCAGCTGGGTTGGC…	ARS732.4	7	912800	913200	27.21	0.06	1	TAAAATTGTTT	1	912854
ATAGATAGCGCAGTCTTGAAGATTTACCTATATTTTTAAACTTTTGTATAATAGTTGAAATAGATAATACAGCATTTTTTGGCTCCTGCTTCATATCTTTTTTTTTAGGTTTTTGCTTTATATTCTTTCTTTTAACTCAACTTGTGCGGAGCAGAGGTAAAGAGGACAACTATAAATGCTGTCAAAACGAACAATCTACAGATATTTTTACGAAAAGGAAAAAGCGCAAGAATGAATCTTAAACTTTCTGCTATTGAAAGTTACTTTTTCCATAGAAGCAGACTAAATTTGCATTCATGTTTTTATGTCGGAATCAAACTCAACGAATTGCCCAAAAAAAGTCAACTGATAGCGGCTCTTAAGTATACTGTAATCCAACATGAACGTTTGACTTGTAAT…	ARS732.6	7	916800	917200	27.21	0.06	1	ATTCATGTTTT	0	917104
GTTCAAATCAGTAGAGAAATAAGTGATTGTGGCGGTTTCGTTGGTGTCGAAAGTTTCATCGATTGGAGCAGACATCACTAAACGAATCTTTAATAGAGCACCTTGACTTTGAGCCTTGTTAGTAGCTTCTTGTTGTGGTATACGGAACCCAGAAGCATCAACCTCACTCAACTTGAAAGATTCTAACCAAACTTCTCTCAAGGAATCTTGGGAAGTCCCTGAAGATAGTAAGCTATTTTCACCATGTTTGAATTTGTTGAAATCTTTCACAGTTGCAAATCCTAGAGTGTGATAAAAGTGAATGGTCTTCTTGAATAAAGCTTCATCATTTGTGATGATAGATCTGAATGCAACACCGTAGCATGAATCTTGAGATTGCATCTTTGATATGATTTTGTT…	ARS733.0	7	973200	973600	41.35	0.11	1	TAAAAGTGAAT	1	973649
CTTCCTTGCCAATTGTTAATTACCCAATGCCGTATCATCCTGGAGCTTTTGCCCAGCAGCAGCAGCAGCAGCAGCAACCGCTCCCTACAGTCCCGCCATATAGCAGTTACTCCACTCCATTTCCCTCAATGATGAACTCTCTTTCGAACTCTGCTTCTAACTCACCTGCTTTAGGAGTTTGTAATAATAATGTAACACTACCCAAAAAAAGCAATATAAGTGAAAGGCAAGCTTTGGATAACCATATACAAACTTTAAAGAACTCTCTATCAACAATCACTGATTTGATAGAAAAACATATTAACAGCGCATCGCAAGATGAAAATAAAACTCTAACTAATGATGCCATGAACAAAGACCTTCGAACAAGCTTATCCCTATTACAGAATTCCAAGGAGG…	ARS734.0	7	988800	989200	34.93	0.06	1	AAAACATATTA	1	989137
CTCGAAACTTCTGATGCGGTTTGTCTTTCACGTATAATGTTTTTAGTAAAATAAAACTTATGGTTTATTTTTGGATTTTTAATCAGGGTGCCTTGTAATTTGGGATGTGTGCTATGCTTTACTTGTTCACACTTTTTTTGAGACCGTTGAACGAACTAAAATTAAGAACACTCTAATCCTTCGAACAAAAGGCACTTTTCAACTATTATTTACTTATTCAATATTTAAGGGAAGTTTCTTTATTGTGCTTGACATATATATATGTATTTATTTATATAGCGCAGTGGCCAAGAAAATGTTAACGTGAAATAACGACTAACGGGCAGGCGTTATGCACGGAAAGAGATCTACTAAATTCCGCCCAATAGGGAATCTCCGACTGAATTTTTTTGCCCTTTG…	ARS734.1	7	993600	994000	34.93	0.06	2	AAAATGTTAAC	1	993818
AAGAGGAGGTCCCCGACTATTATGATTTTATCAAAGAGCCAATGGACTTGAGCACCATGGAAATAAAATTAGAGAGCAACAAATATCAGAAGATGGAAGACTTCATATATGATGCCAGATTGGTGTTTAACAATTGCCGAATGTACAATGGCGAGAATACGTCGTATTACAAGTATGCTAATAGGCTAGAGAAATTCTTCAATAATAAAGTAAAAGAAATACCTGAATATTCTCACCTTATTGATTAATGCGTAGAAGAAGCTTTTCCGCTACTATTCCTTTCGAAGAAGAAATAAATGTTTAGTACGGCGAGACGATGTGATCAATTGAGGTTATTTTACTACTTTTCCTTTCATTTTTGTAAGGTTTTCTTTCTTTGTTAGTGTGACGTTGGTATTT…	ARS734.2	7	998000	998400	34.93	0.06	1	ATAAATGTTTA	0	998236
GGTACCTTGTCTGAATCCATCAAGGCTGCTCAAGACTCTTTCGCTGCCGGTTGGGGTGTTATGGTTTCCCACAGATCTGGTGAAACTGAAGACACTTTCATTGCTGACTTGGTCGTCGGTTTGAGAACTGGTCAAATCAAGACTGGTGCTCCAGCTAGATCCGAAAGATTGGCTAAATTGAACCAATTGTTGAGAATCGAAGAAGAATTAGGTGACAACGCTGTTTTCGCTGGTGAAAACTTCCACCACGGTGACAAATTATAAAGCTTTTGATTAAGCCTTCTAGTCCAAAAAACACGTTTTTTTGTCATTTATTTCATTTTCTTAGAATAGTTTAGTTTATTCATTTTATAGTCACGAATGTTTTATGATTCTATATAGGGTTGCAAACAAGCATTT…	ARS735.0	7	1002000	1002400	43.84	0.07	1	AAACACGTTTT	0	1002272
TAAAAGTCCGATAATTTATCTTTTAAGTCCACCATATCGACTAAAGTTGTCTTTAGATCTTTTAATTGCGGAGAATTCTTAATCGATGCAGCTAAAGTCAAACCTGCAGGACCCCCACCTACGATTAATACATCTGTTAACTTTGGAGCTGAAGATTTGGCTGTTGCCAAACCCCTCACCAAAATACGCCGAGTAAGCATAACTTTTGAAAAGAACATGCCTCTGTGTCAATCGATACAAGGTTCACTGAAAGACCAATTTGAGTTACTGAATGAAGAAAATTATCCGCCACAATTATATTTATTCCTTTTTAATGTCGTATCACAATTCCAGAAGGGATATTTCTCAGAAACAGTTTAAGATCTGCGTGTTCCTTCTGCAAGAAGAAGGGAAAAAAAG…	ARS735.1	7	1004000	1004400	43.84	0.07	3	AATTATATTTA	0	1004040
ACCAATTCTAAAGGTGCAATACTTGTTGCTGCAAATACCCTCGCAATTGCACCACAAAAGAGGGGGTTTAATGTTGGGTACGTCGAGGCTATAGGAGAAACGTCTCTTATATATTCATAACCACTAAAATAAACCATGTTGGCAGGAATAGCCATTAATAGGGTCAAAGAAATACCCCTCCACAAACTTGTAATACCTTCGACGCTGGCAATTTTCGTGAATGCTTCTAAAGTACCGTTGAACTTCAACGATGAATTTTTACAGTGCAGTTCTTGAAAACAAGCACTCTCCCAAAATATTTTTGCGTTGTTCAAGTTCTGTCCTCCGACGTTGGTGAATGTCTTCATTTTGGAGCCTGAGCTAACGGCGTTGGGCACTTCGGCAGCCCCATCACATGAA…	ARS735.3	7	1006400	1007600	43.84	0.07	1	AAAATATTTTT	1	1007057
GTAAATTCCTCGAAGAAAAACACATGACCAGAATGATAGACATATTGAAACAGTGAATAAAAGGGAGAAAAAGGCTTAAAGGATTTCTGTATTAGTAACACTAAGCCCTCTATCAATTTCATCCAAACAGAAAGACTGCAGGTACATCCATAGGATAGAAGTTCTGTATGTAATCCGCCACTTTTTGTCTCCTTCATGTACCATATAATGAATAGAAAAACGTAGACCTAGGCGGCAACCGTTGCCTACCATACGAAGCGCTGATGCTGTTCTCCGATTATTAGTATTACAAAAAAAATTATACAATACTTATTAAGATGTTAACTTATCAATTTCCGGTATAGTTTCCGCTATGGTCAGCTTTGTCCAGTGGAAGTTCCGCTGTTTCAGAACTAGAGC…	ARS131a.0	7	1079200	1079600	27.15	0.03	2	AAAAAATTATA	1	1079590
TCGGTAGTGAGATGGCAGTTCGAGGGGTTTTTTATTCAAAATAATAACTTCTGGCTTTTCGCTTTTATATAGCAGAAAAAAAAGCCGTCGAGGCGCGCGCGTTCATGCAATGGCTCAGTAACCTCGGGATAGAAAAAGGGCAACAATGTTGAGCTATTTTAGGCACAGAAACTTTACTATTCGAAAAGGGCATCCATTTCATTTCCGATTTTCTATCTAGCTCACTCGATAATCGTAATAGTACTTTTATAAAACTTTAGTGCGGGTACTGTGAGAGTGTGCCGTAACTTTGGTTTACATTTAAGGTGCGACCAGCAATGTCACTACTTTTACAACAACCGCCATATGGCTCGAGAATTTCATTATCACATGGAATGCCTGTGACAAAACTGTGTAAAT…	ARS131a.2	7	1082800	1083200	27.15	0.03	1	GTTTACATTTA	0	1083029
CTTACCCTACTTTCACATTCTACTCCACTCCATGACCCATCTCTCACTAAATCAGTACTAAATGCACCCACATCATTATGCACGGCACTTGCCTCAGCGGTCTATACCCTGTGCCATTTACCCATAACGCCCACGATTATCCACATTTTAATATCTATATCTCATTCGGCGGCCCCAAATATTGTATAACTGCTCTTAATACATACGTTATACCTCTTTTTCACCGTATACTAACCACTCAATTTATATACACTTATGCCAATATTACAAAAAAATCACCACTAAAATCACCTAAACATAAAAATATTCTATCCTTCAACCATAGTACATAAACACACTCAATTGCGTATCAATACCACCATGACGTCATTAACTTAAATGTTCCTTAATACCGTCATA…	ARS131n.0	8	5200	5600	57.46	0.08	4	TAAACATAAAA	1	5454
CTACTGAGACCCCAAATAACCATACCAGCAATTATACCTCCATCGGCGTCTTGACCTGACCTGTAGCGGTAAAATAGTCCCATAGTAATGAAATAAAGTGAGCCACCAAAAATAATATACGACTTCAATCTAGATGATCTCGTAACGATGAGCCCCAGAAATGGAGCAACAACAGCAGTCACAAAAGAGTATAAGTTTATTATTCTTGTAGCTGAGGAAGCGCTCTCATCTACCGCAACTACTAGAATGGTGTAGAGATACCCAGCAGCCATTTGATATACAAAGCAGATAAAAAACATAATTCCCAATGGGGCCCACACGCCACGATCTTTTAGCAGCTTGAATGGAGCGAAAGGAACCAAAGCAAGTCGACTTTCCCAATATATGAAGCCTGGAACC…	ARS802.1	8	9200	9600	45.18	0.04	1	AAAACATAATT	1	9120
AGGCATGCATCTTTATAGATTCCGTATGCGAAGGTATTGTTTTCTGGGGCCTTTGTCTATTCGTATGCGCAGAATGTGGGAATGCCTATTATAGGGGTGCCAGAGTGCCTTATAAAACCCTTTTCCGTGCCTTTGAAGTTTCCGTTTTCGGTCAAAAAGAATATCCGAATTTTAGATTTGGACCCTCGTACAGATTCTTATGTTTAAGCCCATATTCAATTTGCTGTAAACAGCCTCCAATGGAAGAGGTAATACTATATTATCCCTCTCCTGATAGTTTAATTAAAAATAGAAAACGTGTATTGGGAGTCGCTTATTTGTAGAGTTTGTAGTTTTTAAGCGTTCTCAGGAAATTCATTGACGCAATTACGTAATTGTAGGCCGCTGAGAAGCAGCTAG…	ARS802.3	8	12400	12800	45.18	0.04	1	AAAACGTGTAT	1	12815
TCCCCATTATGGTGGCTCTGGCATCTGGGTCCCAATAGGGAGCGAATAGGCCACTAAATGCGGGGACGAAAACTACGCCACCAGAATCAGGAACCGTAGATGCAATCGGTCCGACATCCTCTGATTTATCGATCAATCGTAAATTATCACGTAGCCATTGGACCACAGCACCAGCCACAGCGACGGAACCCTCTAATGCAAAATGTGGCTTGCTCAATTCTGGTTTTTGGCCACCGTACTCTTGCAAATGTGGGAACCAAAATGCTAGAGTCGTCAGTGCGCCATGTTGGGAGATCAATTTTTTGGTCCCCGTATTGTACAGTAAAAAGCAACCGGTACCATAAGTACATTTTGCAGCACCGGGTTTGTAAGCGAGTTGCCCCACCATGGATGCGCTTT…	ARS804.0	8	37200	37600	34.56	0.12	1	GATCAATTTTT	0	37239
GTTGGGAAAGCTTTGAGGCGGAGATTGCCGGGTTAGAATCGCAGATTTGTGTTAATGAATCGATTACATCCTGTCTCTGGCCTAAGATTCCCTCCAACTGCTTGTCTATCTTCTTTTCTTGGCCAGTTTGTTCTGAACTAGTTGTCTGCGCGAATGTGGAGTACTTGGAAAGAAGTGACTCCGTTTGTGTTTCTAGAGAAATGGCCTTGCCCCTTATGGTGACGAAAGACGGTTGTGAGCTCATGTGGTGTGGTTGCTTGTCTGGAATTGGGCTTTTCCCTGTGTCTAGTTAGTTTATTTTTTCCTTGTCTTTTTATCTCTTTTTTTTTGTTTTTCGTTCTCTTTATTTTCAACAACGCCTAGAAAATTTGGTTACCAACCACACTATTGAACAAAGAT…	ARS804.1	8	39200	39600	34.56	0.12	2	GTTTATTTTTT	0	39531
TGTTCTTGCTAAAAAGGCCAATGAGTCATGGTCATTGCACTTTACTAGATGGATAGTCGTTTCGATAAGGTTCTTGTTGCGAAACTGCTGTTTTAGATTTTTCAAGTAGTGGGAATTCGCCATGGGCGACTTCTTGTCGTGCATATTTGCTAGCGAGCCCTTTACCCTGTAACGTCTCTAAGAAATTTCGAATAGTGATCTACAGGTACGTCTGAGCTATTATCAATTTCTACCAGGAATTTGAAGCTCCCACAGAATAGCTTCCAAGAAACCTGAAAAAAAAAAAAAATGAAAAATATGTATCATTCCTCACGAATGAGTCCATTGCTTTCCCGTCTCAAATGATTGAGAATATATCGTATGATAACGTAAGAGTATTCAGTATCAACGGCAACAACA…	ARS804.3	8	48000	48400	34.56	0.12	2	AAAATATGTAT	1	48113
ACGACGTCGTCAACTTCCACTTCAACAAGTACAACATCGCCAACTTCTTCTTCAGCACCTACAAGCTCGTCTAATACAACACCAACGAGCACAACGTTCACTACGACATCACCCAGTACAGCCCCTTCAAGCACTACGGTTACTTACACCAGTACCACAGCATCTCCAATAACGTCCACTATAACTTCTGTAAACCTGCAGACCTCCTTAAAGTATTCTGTGATAACAGTGACTTCAGTGCACACCATGGACACTAACATTTCGGAAATCACCTCGAGATATCTCACCATGAAAAAAGTAATAACGCAGATTTACTCTTCCACCCTCGGGGCTACTCCTACTTCTGCAGTGGCTACTACGTCTGCCAGCGTAGGTGGTAGAATAACAAACAATAACAAT…	ARS804.4	8	49600	50000	34.56	0.12	1	AAAAAGTAATA	1	49813
TATATGTGAAGAGCGTCTATTTTCAAGGGTGTTGATGCATATATATCCGTATATATGTGTGCCGGTGGAAGGTTATAACATCTTGAAGAAAGAAAGAGGAGAAATTGGTTTTAGATCAAGGACAGATAAACTATATCTTTCAAAAGCCGATGCAAATCGTATACAGCAAATATCAATGAAGGAATGCGATGGAGGTGATGCTAGTGTGGACTGCACTATTTTTTTTTCCTGTTTTTTTCCACTTTTGTGTAGGAAGAGTATTGAATCAGGAAAGCGGGAAAAACCGCAAAGAAAAAAGTAAACTTATCCGTGAAAATCAATTACATTACCGAAAATGGCAAGATCCAAACAAGAAAAGTAAGTAAACGAATGCGAATACTGGAACAAGCAGGGCATAAA…	ARS804.7	8	54000	54400	34.56	0.12	1	AAAAAGTAAAC	1	54454
AGGAAGTAACTGCAGGTGAAGCACAGGACGAAGCCAGCTTGCAGCAGCAACAGCAGCAAGATTTGCAGCAACAGCAACAAGTAGTGACTACAGTTGCCTCGCAAAGTCCTCATGCAACTGCAACGGAAAAGGAGCCAGTACCCGCCGTGGTTGACGACCCACTGGAGAACATGTTCGGAGATTATTCCAATGAGCCGTTCAACACCAATTTCGACGATGAATTTGGAGATCTTGATGCTGTATTTTTTTAATAGCCATGGGCGGCTACTTCTTGGAAATATATACTTTCCTTTTACATATTTAGTATAGTTATACATGTGGATGTGTATGGAGGTAAGATCAGATAGACCCTTCACTGTTTTCTGTGTATTCCTTGTGACATAGTGGATTTGTGCAGCT…	ARS805.0	8	55600	56000	30.52	0.52	1	TTACATATTTA	0	55887
TCAATTAGACAAAGAAACCACCAGAGAGGAATTGAATAGAAGATTTTCCACTCATGGTAAAATCCAAGATATTAATTTAATCTTCAAGCCAACAAACATATTTGCGTTTATTAAATATGAAACCGAAGAAGCTGCTGCTGCTGCTTTGGAAAGTGAAAACCATGCAATTTTTTTGAATAAGACAATGCATGTTCAATATAAAGAGGTAGGTGGTCGTCACAACAGGAAGTTCTCTGGTAAGAACGGTGGCAGCAACTTTAACCATCATCAGTTTTTTAGCACCAGATCGGGCAAAACATTTACAGGGCCAGAACTGAACTTAGCACCACCACCAATCAACATGTACAGGAAAATGAGCGGCGGATCCCAGCAGGAAAGCGAAACTATGATGCCATACAT…	ARS805.1	8	58000	58400	30.52	0.52	1	AAAACATTTAC	1	57989
ATTTTCCGTCCTCAGAAATTTGAATGTCCTGAGGAGCGGTCAATTTCTCGTTATGATACAGTTCTCCCGTGGTCACCAGCTTGGCACTATGGGAGGCATCTCTAAGAAAAACGTTGTTAAAGCAAACGGAAACCGGCTTGCTGGACTCCTCCATGGAGAACGTAATTGTCGTAGAATCTCTATTGAAGTATGTTTTGATGATATGTCCCCGATTCGCAGCCGCAGCTGTCGCCGCAGATGTGTATGTCCTTGGTGTAGTGGTCAGTCTTGCAAGGATTCGAGATCCTCTGCATAAATTTGATCTTAGCATCTTGTGTTGGTAATTGGTTTCTAATAATTATTTTTTCTTTTTAACTTGGAATATGTTCCTGGCCAGTTGTGAAGAGTTACCCCTGATAT…	ARS805.2	8	65600	66000	30.52	0.52	2	TAAATTTGATC	1	65837
GCAGGCGGTCATATTCTTCCTGGTTGAAGAGGGGGAACTCTGCCACCATGGATGCACACGTATTTGGATCATCTTCGTCGCTGTTGTACTGTGAGCTCTTGTTTGTGCTATGTTCTCGGTGCCCCTTCATGGTTTGTATCTCCCAGAGGAGAAAATCGTCACTCAAGTTAAACACGACCTTGCCGATGTTTGCCTTGAATCTAATTTGCTTGCTGAGGTCTATTTTATATTCCTGGAAGACTTTTGTCAGGGGAATTCTCACGTTTAGCTTCGACGTTGAGTTGGTGGGTTTAAAATTTGTTTGAATTTTGGTTACAATTTGGATTTTAAACTTCTTCAGTTTAGGTTTGATTTCAAAATCTTTCAACCTCACCATCGGCGCATCCTTTACATGTCTCT…	ARS805.4	8	68000	68400	30.52	0.52	1	AAAATTTGTTT	1	68287
AAAACTACGGATACCCGCTCCCGGCTTGCCACGTGACCTGCCACAGTGTTCGTAGTCACGTGCTCCTTCAGTCCTCCTAACTCTACGTACTTCCTGGCAGTGTCTCCAAGGACTATCACCAGTACGTTTGGGCTTGACTGATCCAGGCTCCAATCGCTTTCTACTAGCTGTTGCAACCGCTCTTCAAACTGCATATTGTATCCTGCTGCTGCTGTTGTTGCACCCGTTATTGCACCTGAGCATTAATATATGCGTATATGTATCTATCTATGTATATGTGTATGTGTAATATGTATACGTTTATGTTAATGCATAAACTGTAATGAAACGAATACTCACCCGCTTGCTCTCTCTCACGTATAACACACGCATACTGCCCTATTTTCCTGTTTATCTCGG…	ARS805.5.0	8	98800	99200	39.37	0.06	1	GTATACGTTTA	0	98888
GACTTGCTGGTCGTATTAAATCCCACAGAAAATAGAAACGCTTTGTTAGAAGCAATTAAATCAAGGGTCCCAACTATCGCAATCATCGATACTGACTCCGAACCTTCTTTGGTGACCTACCCTATCCCAGGTAACGATGATTCATTGAGATCTGTCAATTTCTTACTAGGAGTCTTGGCGAGAGCTGGCCAAAGAGGCTTGCAAAATCGCTTGGCCAGAAATAACGAAAAATGAACACTTTTATTTTCTTTTGGCTTGTTAACCTAAACTTGTACATATGCCCATATATCCTTAAATATATATATATAGCCAACCCGAAGACGCTAAATAAACGCATTTTTTTTTTTTTTTACAGAATTATTACTTTCGTACTTGGGTTTATGCTTCTTATAACAACAA…	ARS805.5.1	8	100400	100800	39.37	0.06	3	TAAATATATAT	1	100456
CGTCGCACGGTGCACAGCAATTGCCGTTTTCGGAGATCTCCCTGAGTAAGCAGTCGTTTACGACCTTAATGGCTTTACAATTATCGGTTGGAACAATAACAAGAACAATTGGTTCTCTGCCTGGTGGTGAGTTAATCTGGTGGGAATGTAGTGCACAGGCGCGAGTAACGTAGGAAGCGAGAGAGAACAAGGAAAAAGAAAAAGTGGAGGAAGGTTGGTTGTATTGTCTTTTTCGGTTCTTTTCTTTTCTTTTTTTCTTTTTTTACGATGCATGTATATGTATTTTAATAGTAAAATATATTATTAAATAGGGGAGTGTGGTTGTGTGATTTAGTAGAGTAGTTAGAATAAAAACGACACAGTGGAAAAAAAAAGGTATTTTCTTTCTTTCTTTCTTCA…	ARS805.7.1	8	122400	122800	25.14	0.46	1	AAAATATATTA	1	122778
TATTTGATAAAATATTTCGGCTTCTTTTATGTGTATGCGATTGCGTATTACTAAATATAAATTTATATTTCCTGCGACCATTTGTCCGTCAGAAAAGGCTCTCAAAAAAACAACACTACCCTTTTACCGGAAATCACAAACTAAATGTTAAAATAAGAATTTAACATCATCCATTGATTATGAATATTGAGTGAATGATTTAATGATTGTTGCGATTTCCTTGTTGGTGAAGGCTATGATATCAGCTATGCAGAATATACTAGTAGTTATCCACCAGAACATAAGAATCCTCAAAATGTAATTAAAAATCCACTATCGTCTATCAACCAATAATTATACTATCAATATATTATCATATACGGTGTTAGATGATGAAATAAGTTATGAGAAGCTGTCATC…	ARS807.1	8	133600	134000	17.8	0.5	2	AAAATGTAATT	1	133668
GCTGATTCCGCATTGTTTGTTAAAATTTTGGTCATTGAAATTTTCGGGTCCATTTTAGGTTTATTAGGTTTGATTGTTGGTTTATTGATGGCCGGTAAAGCTTCTGAATTTCAGTAAGCGCTCAAACCAGGCTTTTCTTTTCCGTTTTTACGAGCTAGATAAGCGCATCCATATTTACTAATAGATATAATGAGATATCTGAGATACATGTGTATGTATATATGCACGTTTTCTTTTATTATCTAAAAATCATATTATATTAAGTAAGAGAAAAAAATGTACAACTATATAAATATATATTTATTTAAAATGGTTTTGAATTTTTCCTATTCTGGTTGATATTGCCCAAAAGCTATTCAGTTTACTCCTCTTCACGATAGTCAGGGTTCTTCTTTAAAA…	ARS809.1	8	161600	162000	37.39	0.1	3	ATATATATTTA	0	161652
TACTGGCGCAACTGACATCCCGTATTTGAAATGTCTTCCGCCATCTTTCTCCAAAGTTTTTAGTGTCAGGTACCCCCCGTATGACCAACCAAATAAGGAAATCTTTTGCGGATCAACAAAAGTTAAAGAACCATATAAGGAAGCCGCAGATATTTGGTCGCGGGCCTCGTAATCACCGAGCCTATCGCGAACAAGGGATCTAAAGTCTTGACCTTTGAAGCCAGTACCACGACCGTCAACAACAACTACAATTGCGTTTAATTGTGAAGCTACCACTTCATTAAATCCTACGGAAAACGTTTTGACAACTTGTTGAGAATTCGGTCCCCCATATGCAAAGAAAAATACAGGATAGTGGTCACTTAACGTTTCATCGAAATCATTTGGTAGGATTTCATA…	ARS809.2	8	165600	166000	37.39	0.1	1	GAAAACGTTTT	0	165600
CTCACAAACAGCCTGAAATCTTGCACTTCTTGTATAACCATTTGTTTTAAGTCCTCCATATCATTAACCGATTCAAAACTAAATTCGAATTTTTCACTACACACAGGTTCGTCAGCTGGATCATGCCATATAGACAAGTAAGGATGCTCCAGGGCCTCATCCACGGTAATTCTCTTTTGAGGGTCAAACGCGAGCATTTGCTCCAATAAGTCTAATGCTTGTGAATTGGCATTTGGGTATAAATTGACAAAAGGTACTTTTGGAATGAAACCTAATTGATGTATGTAGTCCTGAACATTTTTAGAACCAATCCTTCTTAAAGTTTCGTCTGGGGGTGTCCCTAAAACTTGTAATATTTGATTCAATTGATTAACGTAATCCTTTCCTTTGAAGATTGGC…	ARS809.4	8	169200	169600	37.39	0.1	2	GAACATTTTTA	0	169540
ACTTTTTTTTTCGATATATTCCTGGCTAGATCTCCTTTTTCAGTTTCTATTTTTAACACTGAAACTTTCCATTCTGCCAACATTTCGCAGTCTTCTATAAAAAAAAAAAAAGATAATATAAAAATCGCCGCATACGTAGGCTTAGCTAAATAGATGGCTTCTAGATGAATATTTCGGGATTCTGTTAAATTATACAGATAGGCTCACAAGTATTCGAACCTGTATAGAACAAGAAAAGAAAACTTCAACTAGAGTATATGCATTTATTCGTTGCAAGTCATTTCAAAGTTTCTAAACGTTTATAGAAATCTTTTACTCTTTCATTGGTGCGAATCTTTCCTGGATCAAAGTTTAGGACCTGTAAGGTGTCCATAGTTACCGCTCTTGACAGTGCAACAT…	ARS809.5	8	170800	171200	37.39	0.1	1	TAAACGTTTAT	1	170805
TACGTCTGTGGTGATGCAAAGGGTATGGCCAAGGGTGTGTCAACCGCATTGGTTGGCATCTTATCCCGTGGTAAATCCATTACCACTGATGAAGCAACAGAGCTAATCAAGATGCTCAAGACTTCAGGTAGATACCAAGAAGATGTCTGGTAATCAGCCCACTGATCAAGCCTTCGGCGCGGTTGTTCAACCACACGATCTGTATCAAAGAAAAATAAGTTAGATAACCAAAAAAAAAAAAAATTTCATACTCACTATAAGAAATCATACGCAGTTCAACTTTTGCTTTTACATACAATTTTATCTATATATTCGTGCTTCTGCGATGTCCTTATTTATTTAATCTCTCGTCAAAGGGTTGTTTACCTGGATAACGATACCGTTCTCATTGTTCTTAAC…	ARS810.0	8	192400	192800	49.31	0.04	3	ATACAATTTTA	0	192749
GGATACTTTCGAAAATAACTGGAACAACCTTTTCCAATGGGATTCTAAGATATTGAAGGAAAAAGGCGTGAATATTCAACAAAGGAAATATATACTGAAACAAGTTCATAACTATCGTAACAATAGGCCAATTCATGAAATTAAACTGGGCAAGAAGTCATTTTTTGGTGGTGAGAGGAAGAGAAAGGCATTTACTGCTAAATGGAAAGCTGAAAACAAGCAATAGACGCTTTCGCAAGATCTCAATATATACATGTATACGTATATGTTCACATTATACTCCATATTCTTGTAAATATATAATAAACTCAGAAATTGTTGTCCTTCATTCATGTTGATATTTATATGAAACGCTGACTGGGCCTTTCAAATCTTCATCGGTTTGAAATTTGAATTGTA…	ARS810.3	8	220400	220800	49.31	0.04	3	TAAATATATAA	1	220567
CGTTGCATTTGGTGCGCAAAGTTGCACCCACCAAACCGATGTATTGCGCGAGTTTCCAACTTCCAGCTAACGTATGAAGCGATCTGCTCTTGCAGTTTGCCGTGGGAGGAAAAAGGCAAAAAGGCGACCATTAGAAAAAGAAACGAGATGACTAACACCTTTATCTTCGAGAAGGCGCGGGGCTGACAGGGCACTGCGCGATGCGTCATACTACTTGAATACAACACAACCCGTCTTCTGTTATATAAAGAAGAAGAATAAATTAGGAAGTAGGGGGAAAAGGCTTATAGTGTAAAAGTATTTTAGTTTGTTGTTGTAATTTCGTCTTTTCTCTCACTACCGTAACAACGTGGTAGTTGGCAGAATATATATATTCTTGGCAACCTAGTTGTTACTCAA…	ARS813.0	8	236400	236800	35.79	0.09	3	TAAAAGTATTT	1	236596
CTGGGTAAGCTGAATTATGAGCTGGCCATTCCATATGACGAGTTTTTGCTATGGGAAACGAACACTTTAATGAAAGCGAAATTGCGCGTCGGAACTCCCGCCAACGCTCCGGTGAAGAGACCCAGAGAATCAGACAATGATTATGATGCAAATTCTTGGAAACAGATTAAATCTTGTTAATTTCGAAAATGTTATATATCTTTCATTCATCAATAAATTAACTTTTTTTTTTTTTTTTCCTTGCTGAGCTTTTGATCTATTCAGCTATGTGCCCTGTCATGTTAGGAAATACAAATATTTTTTAAAAAAAAAAAATAGTGTGTGTTTACAAAAATGCGAATTCTGTGGATCGAACACAGGACCTCCAGATAACTTGACCGAAGTTTTTTCTTCAGTCTG…	ARS813.1	8	237600	238000	35.79	0.09	3	AAATATTTTTT	0	237806
ATGACAATCGGTTACGTAGCCGTAAACTATATCGCCGGTATTGAAATTCCTGAGCATGAGAGAATAGAATTAATTAGATACATCGTCAATACAGCACATCCGGTTGATGGTGGCTGGGGTCTACATTCTGTTGACAAATCCACCGTGTTTGGTACAGTATTGAACTATGTAATCTTACGTTTATTGGGTCTACCCAAGGACCACCCGGTTTGCGCCAAGGCAAGAAGCACATTGTTAAGGTTAGGCGGTGCTATTGGATCCCCTCACTGGGGAAAAATTTGGCTAAGTGCACTAAACTTGTATAAATGGGAAGGTGTGAACCCTGCCCCTCCTGAAACTTGGTTACTTCCATATTCACTGCCCATGCATCCGGGGAGATGGTGGGTTCATACTAGAGGT…	ARS813.2	8	239600	240000	35.79	0.09	1	TAAACTTGTAT	1	239702
ATCACATAGACAGCATACTCAGAAAGACATGGATGACATATATGTCCCATTGCCCAGCGAATCTTACGCTACTTTCTCCATGAATCTACGTTTGATTCAACAACGACTGGAGCAGTGTAAAAAAGACTCGTTATCTTATAAACCAACTACTTTACATCAAAGATCGGAGGGGCTAAATGGAACACATTCGTCATCTTCCGTCTTTACCAATAATAGAGTGTCTTCATTCAATCATTCTTCTTCTGGTATGACGTCATCTGATTCTTTAGCCTCTGAAGAGGTTCCTTCCAACAAAACATATATTGAGCATGCTTTATATAACCAATTGGCAGATCTTGAAGTATTTGTTAGCCGGTTCGTTACACAGGGAGAGGTTTTATTCAAGGACCACCAGATCCT…	ARS813.4	8	243200	244400	35.79	0.09	1	AAAACATATAT	1	243956
TATGGAAGGGAAATATAAGATTATCAACTGGTTACCTCAAAATAGACTATATGCTCACATCATCAATTGATATTGCTTGTAAAAATACCCCCAAATACCCTGGCATTCTTTTTTTGACTCCCTGCCAGTAATGTCACATCTTATCACTTTAGCTACATGCAACTTGAATCAATGGGCCCTAGATTTTGAAGGTAATAGAGACCGTATCCTACAGTCCATTAAGATTGCCAAAGAGAGGGGTGCCAGGTTACGTGTCGGCCCAGAACTGGAAATAACTGGCTACGGATGTTTAGATCATTTTTTAGAAAATGACGTTTGCCTTCATTCATGGGAAATGTATGCTCAAATCATTAAGAATAAAGAAACCCATGGATTAATACTTGACATTGGTATGCCCGT…	ARS813.6	8	246400	249200	35.79	0.09	3	GATCATTTTTT	0	246355
GGTCTATACATCTGATGACGAAATCGCGGCGGTAACTGTATAGACCGCCTAGAACTTTTGTTAATAAGGGAATATTTTGATAGCTAATCTTATGTGGTTTTGAAAACAGAGAAAACAGCACTTTCTGAATAGCTACATCGTCCCAGTGAGCTTTCCGAACCAACTTGACAATGTGTTTGAAGTCTAGGCTACTTAGTTCACTTCTAATTAATATGCGATAAAACTGTTGTTCAGGCGTTATTGTTTTTACCGTAACATTTAATGATTTTACAGAAGGGGGATAAAGTAAAGTAATTATGTTTTCTAAGGCGCTTTTCATGTTCATGTTCAATTGCCTATCATTTTTTTTATCCTTGATTAGTTGGACCATTTTTTCCATTAATTCCTTATATTCTGGCT…	ARS813.9	8	253600	254000	35.79	0.09	2	AATTATGTTTT	0	253979
TAACGAAATTGGATTATACTCTTTCTGTAATTTCAGGTTTTCATCTGATACATTCTTAGACTCCACCAAATCTTGAAGGTTCAAATTGCAGAGCTCTAAAGCAATATACAAAAATCTGTCTGTTGTTTCTGAACAGTAGTATCGTATGACGTTAGGGTGATCATCGCTTTCAGTCAAAAGTTTTATTTCCATTAAAGCTATGTCACAAAAATCAATTAACATTCTCTTTACCGCAACAGGTCTTCCTTGAAAACTTCCCTGAAAAACTACTGTTCCTGATGAACCGTAACCTAAAATTTTTTCGGATACTACCAAATTTTTTAAAGATTGCTCAAAGTTTGGTATATTTGCAATGCGTGATTTTCGGCCCTTTTTGCCTCCTCTCGAACCTCTTTTCCT…	ARS813.10	8	259600	260000	35.79	0.09	3	AAAATTTTTTC	1	259553
GCAGTGACCGGAACAGAAGTTCTATTATCGTCTACGTCCTTTTGCTCCAAGTGTCCACTATGTGTTTTCACTAGCTTTAAATTGTTGTTGTTCACTTGTAGATGTCTTCTTGAGGGGAGAGACTTTTTTCTTGCTATGCTGTTTTTCCTACGAGATTCTTGTGCGTGGTTGATAACATCTTGCTCTATGGCAGCGGAAGACGCTGGTGCGCCATCCAGGAACGTCGTTGAGCCTAGACCCATCGTAATGGGCCCATGGACTAGTTCAGTTTTCATTTTGGAATCGAACTGGGTAATATTTTTTGAATTCGGTTTAATCGCATCCAAAGTCGTAGTACTGGAATTGGCCTTATTGAATAAATATGCTCTATCTTGTAGTTGGTTCAGCGTCTCAGAATCG…	ARS815.1	8	297600	298000	29.3	0.41	1	TAATATTTTTT	0	297778
TCGTGATCAAAATAACACCAACAATTACCCATTGTTCTCTGGCAACGTTGATTGGTCTGGGGATACGGGTCAGGTTAGAAAGGTCTCTTCCCCCAAGATTTAGAATTACTATTTTGTTGAAGAAAGGTACTCATGATAGTGAGAACCAGGTAAATAAACAACTAAATGATAAGGAACGTGTAGCAGCTGCATGTGAGAATGAACAACTGTTGGGTGTAGTCTCTAAGATGTTAGTGACTTGTAAGTAAACGGGGATTCTTCTTTTTGCTTCCCTTACTCACGAAGCTATCAAAAAACATGTAAATTTAACAATGTGCTCTCACTGTATAACACAGCTATAGCTACATTTTATTATATAGTATTTTCTCCAATCGATTAAATAACGGTTTTTACAATGGT…	ARS816.1	8	354400	354800	35.98	0.1	1	AAAACATGTAA	1	354366
CCACATCATATACAGCTGCATTAGATATCTTTTTCTGCTGAGCTGCTAAGGACCAAGATGCGCTGCTGTTGAAGGCTTCATCAGTCGAATTAAATTTTCCTTCTATGTACGAGTTCGTACTATTCGCAAATTGTACGTCCAACGTGTCTGAGGAGTTGCTTACTTGTGCATGTGCAACTAGAATATTGGTGATGGCAAACAATGTGGAAACTAAAGTGCACTTCATGGTAGATTAATTATGATGTTCGTTTGATTCTGTTCTATATTTTTTATATGCTGACTGAACAGATTATAAAAATTAAATTACATGAAGTATTGAAGTTAATGTTGGCTATTTTTGAGGAGGAGGTTCACCTTTATATAGTATTCCTCGAGCTACAAAAACATGGATATTTTTAC…	ARS816.3	8	360000	360400	35.98	0.1	3	TAAAAATTAAA	1	360249
TCTGATGAATCGTCCCACTTGTCGTATTAGAGTTTGTCAACGACACTCACAAGGTATTTAATCAGCAAAATCCCCGCCACAAACTATTTTTTTGAAGACATGCTTTCTCATGACTGCCTAATAACAATACCTCATTCTACTAGTAATCGACCTATGTAATTATTTCATAAACTATAAAGCAGGTCATTGCAATAACAGAAAGGCCGGTTTTTCTATAAGCTTATCTCATCGCATAAAAAATCGACAGTTGTAATTATCTCCGGCGGACTTTTCCCTTTCCGTCTTTTTTTTCAAAATTTTTTTTTTTTTCACTTCTTCTTTCAAAGCTGCCTCAAAAGAGATATATATATTGGTAAGAATCCTCTTCCAATACTAGCTTCATTTCTTCTTGAACCATGA…	ARS816.4	8	361600	362000	35.98	0.1	1	AAAATTTTTTT	1	361908
CCGCCAGAAGTAACGTTCTGCCTCTTGTAAAGTGGTGTTGCAGAAGCTGTTAAAGTTGCAAGAAAAAATGCTAGCACTGATGTGAATTTCATAATAGCTGATTGGGTTCTTAGATGTGAAAACTGATCGAAATCAAATACTAGAGCATGATTGATAGGAACAAGAGAAACCAAAAGTGTTTTTAGCTTTCCTCCCAATTTTTATAGTATTCTAATGAGTAACGTCTTAGGGGAATTTTCAACAAGGCATTTCTAAAAGGGGATGCTAGTTGCACATTCTGAGAGAATCATTTGTACACGTTTTTCCCTATTTTCTGCTCATAAACCGAGGATCATCAGCGTTAAATGTAATTGCTAAGCCAAGAACTTTTGCTACTCTAACATTACATATTTGAAGGGT…	ARS818.0	8	379200	379600	35.29	0.08	2	GTACACGTTTT	0	379401
ATAAAAATAGCATATTGCATAACTTAACTAAAAAGATTAAAAAAAGTCAAAGCTACACTGGCATACTTTGAACTGTTTTTTCAAAGCTGTCTCCACGTGGAAAGTTTATTTCATCAAAACTATTATCAAAAATTGTGGTTTTGTTAATACAAAAGCTGATATATATATAATATGGCATTTAGTGATTTTGCTGCCATATGCTCAAAGACCCCGTTGCCATTATGTTCGGTAATAAAGTCTAAAACCCATCTAATACTTTCGAACTCAACAATTATACATGATTTTGATCCTTTAAATTTGAATGTCGGTGTACTGCCACGCTGTTATGCTCGGTCGATTGATCTTGCCAATACAGTCATCTTTGATGTCGGGAACGCATTCATAAATATTGGTGCTCTA…	ARS818.1	8	383200	383600	35.29	0.08	1	TAAATTTGAAT	1	383660
AAACTATGTAGGCATAAAAAGAGACGGGAGCATCTTAAAGATGCAACTGGATGGAGAATGGCAAAATATGAAGAAGAAGGAAGGAAAAGAAATATTATTATGCGTAACTGTTGATTCCTTTTTGTGGATTTCTTGAGGAGAATGTCTTTTTGAAGAGTGGGTGAATTTTGAGATAATTGTTGGGATTCCATTTTTAATAAGGCAATAATATTAGGTATGTAGAATGTACTAGAAGTTCTCCTCGAGGATTTAGGAATCCATAAAAGGGAATCTGCAATTCTACACAATTCTATAAATATTATTATCATCATTTTATATGTTAATATTCATTGATCCTATTACATTATCAATCCTTGCGTTTCAGCTTCCACTAATTTAGATGACTATTTCTCATCATTT…	ARS818.3	8	389200	391200	35.29	0.08	3	TAAATATTATT	1	389320
AAAGGGTTACAGAAAAAAAAAAGCAGGTCTGAAATGCAGTTCGCCATGGTTAATATCTTTTCCTAATTTGGAAATATGTAAACAGGGCATCTTTCCTTTTTTTCTCCTAATGAAAATTGTAAGCAAAAGCATGAAACAATACTGCCACAAGAGGAGAATTCCTCCTTTTGAAGTCTAAAGCGCCATTTCAAACTAGTTTTTAGGAGGTCAGCCAAACGTTCATTCAGATTAGTTACTATCTTGGAATACTTCTAGTAGGAAAACAAAATAACATATACAGTAAGAACAATAGAAAACGTATTTATGTCCAACAAGGCAAGTGACCAATCAGCACGCACGGCTTCCATCCTCAAGACTGATATTACCAGAGAAAACACAATCACCAGAAGCAGCAGCAGC…	ARS818.5.1	8	400800	402000	45.63	0.02	2	AAAACGTATTT	1	401424
TCTTTTTCACTCATCTAATGTTGTTTTTCGCGTCACATTTTTTGCCAATAAATAAATACATCACAATGTTCTATATTGTATATTCAATGGAAGTCATTAGGTTATTGGGCAAGATTTCAAGGAGGTAGCATACTGGTAAATATACGATCCATGAGCACATCACTTCTGTTTGAGCAGCTAAATTTTTTAATTTTAGTGGCAGCAGAGGCTGAGCTTCCCATCGCTCACTCTACTAGAAAGCTTTTGATGGATAATTCATGCAATAACTGTCAAATATACGAGCTTTATAACGAAAATTTGAAAGATGTCAAGACGGATAAAGATTGGTTCATGAACAAATTCGGCCCGCAAACAGTACATTTTGTCATTAGTAATACAATCAACTTTCCTTTTTATAAG…	ARS818.5.2	8	403200	403600	45.63	0.02	1	AAAATTTGAAA	1	403109
CGGGCGTCGCCAGGTCAAGATTACCATTTCTCGGAGTTGGCGTATCAGTTGGAACATCCATTACGCCTGGACAAAGGTCCTTTATGCGGGCCAAGTCTAGCGTATAAACAATTGTACCTCTTTGCATATCAATATCAGAGGTATGCAAGTCGTACTCCTCGACTCTAGCGTAATCAAATTTATCTCCTCCCATAATCAAAATTTTATCATTTTTTAATAATGTTAAAGAATGCCCAGAACGGCCTTGCGGAATTCCAGCCGTAAATACAGGTAATTTAAACCATTTACGCGATTTCAAGTTTAGGAAATACACGGAGTTCAAATAAGCATCATGCTCATCTTTCCCGCCTACAACACACATCAGATCGTTGTAGACTACAGTAGCATGTTCTTGAACTG…	ARS818.5.5	8	416000	416400	45.63	0.02	4	TTTCAAGTTTA	0	416038
TTATCCAAAGTTAGTGCTCGACGGAAATACATGATAGATTTTTCATGTTCCTGTCGGGCACTGTAATAGTTCGCTATGATACAACATGTTTCCGGTCTAAATCTATCTATTTGGGAGACGAATTGCGCCAAATAGGCTAATTTTGAATTCTTCTGCATGACGTATAGAATATTGGAGTAGGTTTCCAAATCGTTGAGACGGTACGGATCTTGTTTAACGATGTCATCAAATCGGCTTTCTGCGGTAACATAATCCAAATTGTTGTAACTAATAGTAGCATTGTAAGCCTTTAAAAAAGTGAAATTGGGGAAAACTTGTAACAAAAACTCTAAATCTTCAAAGTAGTCCTCTAACTGGCCATTAAGCTCCTCAAACACTTTTAGCTTGAAAAATTTGATC…	ARS820.0	8	436800	438000	30.75	0.13	2	AAAAAGTGAAA	1	438060
CTCTTAATTTGATGTGAGTACCGCAGTACTTGGTCTGCTATTATGAAGTGTTTGTTTTACCCGAAGTGCTTTTTATGTACGCGCATTGAAAAATAATAGAAACTTGGTAAGTAGAATACTTAAGAAGCTGCAGAAGTGCAGTATCTTACAGTAAGAAACAACAGCGACTAGTTTATCAGGTTTACACTGCTCAAGTTATCAAGTTCATAGCATGACAAAGGAAGAAGGTCGTACGTATTTTGAATCTCTCTGCGAGGAGGAACAAAGTTTGCAGGAAAGCCAAACCCACTTATTAAATATTTTAGATATATTATCAGTATTGGCAGACCCTAGATCATCTGATGATCTGCTTACTGAATCCCTCAAGAAGTTGCCTGATTTACACAGGGAGCTGATAAA…	ARS820.1	8	439200	439600	30.75	0.13	2	TTAAATATTTT	0	439423
CGAAGAGGGAATCGCTGATGGCAATGCAAAAGGAAAACTTCGGTGAGAGAAAAAGACAGCAAAAGAAGAAGCAAAATGACGGGAAAAGTTTGCGCTCTTGAAAAATTCTAAATAAGATTTAAAGACGTACATATCGTACAATCTGGATACTGTTTTCCAGGACAACTGATAGATACAATTTTGGCACATATGAAGTATGTTTCTATATAACGGGTGAGAAAATCGCTGTAAATTCAATTACGTACAATCACCGACGGGTAACTTATTTTTTTTTCTTTTTCTCTTGTAGTTGGAAAATTTTTTGAAGCTCATCGCATTGGAAAAGAAAAATTACTAGCAGTTGTGATGATTTAACTATGTTTTGAGGAACCTTGGCTTTATCTTTTATTTGTCGCCTGG…	ARS820.3	8	443200	443600	30.75	0.13	1	GAAAATTTTTT	0	443667
CACTAGGTTGTTATGTTTCACGCGCATTGATAGCATGGGGGGTTAGAAAAATAACATTTGTGGATAACGGTACAGTTTCATATTCAAATCCAGTGAGGCAAGCGTTATATAATTTTGAGGACTGTGGAAAGCCAAAGGCAGAACTTGCGGCTGCGTCTTTGAAAAGAATATTTCCTTTAATGGACGCTACTGGTGTGAAATTAAGTATTCCTATGATCGGTCATAAATTAGTAAACGAGGAGGCTCAGCATAAGGATTTTGATAGATTAAGAGCATTAATAAAAGAGCATGATATCATTTTTTTATTGGTGGATTCTCGAGAAAGCAGATGGCTTCCGTCGTTATTGAGCAACATCGAAAACAAAACCGTTATTAATGCTGCTCTGGGGTTTGATAGCT…	ARS820.5	8	446400	447600	30.75	0.13	1	TATCATTTTTT	0	447003
TATAGAAAGGGTTCTTTACTCTATAGTACCTCCTCGCTCAGCATCTGCTTCTTCCCAAAGATGAACGCGGCGTTATGTCACTAACGACGTGCACCAACTTGCGGAAAGTGGAATCCCGTTCCAAAACTGGCATCCACTAATTGATACATCTACACACCGCACGCCTTTTTTCTGAAGCCCACTTTCGTGGACTTTGCCATATGCAAAATTCATGAAGTGTGATACCAAGTCAGCATACACCTCACTAGGGTAGTTTCTTTGGTTGTATTGATCATTTGGTTCATCGTGGTTCATTAATTTTTTTTCTCCATTGCTTTCTGGCTTTGATCTTACTATCATTTGGATTTTTGTCGAAGGTTGTAGAATTGTATGTGACAAGTGGCACCAAGCATATATAAA…	ARS820.8	8	450800	452000	30.75	0.13	3	ATTAATTTTTT	0	451033
GTGGGATTCTCATTCATGCTCATGCTTGTATTCATGACTTATAATGGTTGGTTAATGTTAGCTGTCGTGTGTGGGGCAATATGGGGTAATTACAGCTGGTGTACTTCGTATAGTCCTGAGATAGATGACAGCTCCCTCGCCTGCCATTAAGATGGTGACAAATATTACAAATTTGATACTATTTGTATCTATTTTGTTTTTATCCGGGATTTTTCGTATTTCTTCCTCATTCATACCCTTCCCTTTATTTGTTCCCACTGAGTATAATGATAAACTACGTTAACATTACATGTATAATATTTAGCACTCGTACGTTACTAGTCTTTGACACAAGTTTATATATCCCCCCCTTTATGTTATCGTTTATTGGCTACAGCCTCAGTAATCAAAATAGTCCAC…	ARS820.9	8	453600	456400	30.75	0.13	4	TATAATATTTA	0	453582
TACTCTCCCGCAACAACCTACTGCAGCACCTTATGAACGGCGTGGCGTGTCGCCTTCAGTGATATACTCCTCCAATACATTGAGCCCAATACCATACCAAAATATCGATCCATACTCTTCGAGGTCGGGTCCTGAATGCAATCACTCTAAGGCGCCTATCGCCCCAACAATGATGCCCCCAGTACACCATATACTTGTGCATGATTACCGACAACCAAAACCAGTCACAGATTCTATTAATCCTCCAAATGTAAACATAACCACCTCCACAACCAACAAGAACCTAGATGGCATTTATATTTTGCCAGCTCCTCGTATGAATCCCCCGGCTCAAACACAATACCAAATGATTCATGCGCCAGACAGCATGCAACATCCACCAACATTTAGTAAAAACAA…	ARS820.10	8	457600	458000	30.75	0.13	1	ATTTATATTTT	0	457804
TGCTTCGTCCTGGTGGTCCACGCGGCCTTGCGCTTTGGCCTTGGTGGGCTTCGAGGCTGTATTATATAAATGGGCCTGATGTTCGTTAAAAGCTGCAGTATTGTTCCTGAGCTTGTTTCTTTTTCAAAGGTTTCCTTTTTTCTTAGTGGGGTCCTTTCTTACATAATAAAGTAAATAGCCTGATACATATAAACCTGTATTGTTGCCATTACAGAAAAAAGCCACTTTCTATACAAAAACTACAATAAAATGTCTGCTGATTTCGGTTTGATTGGTTTGGCCGTCATGGGTCAAAATTTGATCTTGAACGCTGCTGACCACGGTTTCACTGTTTGTGCTTACAACAGAACTCAATCCAAGGTCGACCATTTCTTGGCCAATGAAGCTAAGGGCAAATCT…	ARS821.1	8	470800	471200	37.59	0.08	1	AAAATTTGATC	1	471001
TTTCACCAAAACTTTACTGATTAAACGCATGTTTCCATATACCTGGCCTTCTGCTAAGTAGACATGTATTCAACAAGGGGATGTAACCACACGCTGCTTTAATACCAACAAATCGGCCGCTGATTAGTAATAGGTGCATCATTGCGAATACCGAGAAAGGGTCCATTATACGAACTAATCATTCTATACGGCGTCCTTCCTGTTCAAGCACCTCTCTGATTAGTTCCTTTGATTGAGGCGCTGATGTTGCATCAGGCTGCTGGAGCAGATTTAGTTTCTTTAACGTCTCCTCTTTAATATTTTCGATCAGTTTTTCTGTTGTTTCCACTGAGGTTGTGTTAGTAATTAGTGCGGGTGAAGGTTGGGGGTAGAGTGTTGCGGTGAGGTGACATACGTTCC…	ARS822.0	8	498400	498800	41.44	0.1	1	TTTAATATTTT	0	498683
ATCTTAATTAAAATCTATGTGTTCAGAAGTTGAATATTGGTAAAAAGAAACAAAATGTATAAACGAACGAAAAAGGAAGTGATCAAAATAGAGTAAGGAACCAAGGCATTAGGTTCACCCGAACGTTATCATATATACGCTCATATTATTCCAAGAAAGACACATTTGTCTAGATAGGTTTCGGTAAAGGCGTCCGTAGTTAGAGAGTAGATGGCACTAACTTGAAAGCAGGAAAACAAACAATTGTGTTCCAGAGCAAACTCGAACTTTCTATCTGAACCATTGCATGACGTAAAATTATTATTACAACCATAATGAAACATTTCTACAGTATATCTTTAATATTATTTTTTACTTTAGTGTCCTTATCGATCAGTCGCTCTTTCGCCAACTAGCCGC…	ARS822.2	8	502000	502400	41.44	0.1	3	TAAAATTATTA	1	502176
TCGAATTTTGACCCAGAGTTCACAACAGCTTCAACTTCATACATGAACAAGCACCAGCCGATGATGACTGCTACCCCGCTATCTCCAGCCATGCAAGCAAAGTTTGCTGGTTTCACCTTTGTTGATGAGTCCGCCATCGATGAACACGTTAATAACAACAGAAAATTCCTACAAAACTCGTACTTTATGGAACCTGGTTCCTTTATCCCGGGAAATCCAAACTTACCTCCAGACGAAGATGTCATCGATGATGACGGGGACGAGGACATCAATGATGGATTCAACCAAGAGAAAAATATGAACAACAGCCATTCGCAGATGGACTTCGACGGCGACCAACACATGGATGACGAATTTGTCAGTGGAAGATTCGAAATATGATTTCTCAATCGCTCCTCT…	ARS823.0	8	511600	512000	49.05	0.03	3	AAAATATGAAC	1	511747
TTGTTGCAGAGCGGGCCTCGACTGATGAACACGATGCAGCCAAACAACTCTTCTGACATGCTGCACATTAACAACAAGACTAATAACGTTCAACAACCAGCTGGAAACACAAATATCAGCAGTGCTAATGCGGGAGCAAAGGCTCCAGCAAATGAGTTCGTAAGAAAACTGTTCAGGATACTGGAAAACAATGAATATCCTGACATTGTAACTTGGACTGAGAACGGCAAAAGTTTCGTCGTTTTGGACACAGGAAAGTTCACTACGCATATATTGCCTAATCACTTCAAACATTCAAATTTTGCATCTTTTGTAAGGCAACTAAACAAGTATGACTTTCACAAGGTTAAGAGAAGTCCCGAGGAAAGACAGAGATGTAAATATGGCGAACAAAGTTGG…	ARS823.1	8	513200	513600	49.05	0.03	1	ATTCAAATTTT	0	513124
ATCTGTCATTGTGAAGATTTGAATGTACCTTTAAAAATAGAGTGGTCAACGTTTTATTACTTATGTAGGAAAAGAGAATGAGGTTTACTAAATTAAAAGAAATATATAAAAAGCTGATTTTTTTCTTTTTTTAAATATTTCCCAAATGCTAATAAATATTAAAATATGGCAAAAAGAAAATAAGGTGTTGTTGCGCAGTTGGGAGTAATTTAAAACCGTCAACATATGCTCTAAAAATTTTATTGGCTCTAAATTCCGACCTCTGAATGTAATTATGTTTTAAAGCGATACGTAAACTTGTTACTGTTAACATTAAAAGATAATGCAATCATGGTAACATAATAAAGTCTCAAAAAATTCTTAATATTAACTATAACATATGCACTTCAGAAAGCTGTT…	ARS823.3	8	520400	521600	49.05	0.03	7	TAAACTTGTTA	1	520522
CAAGTTGACAAGCCGCCTTTATTGATAGATCCCCACTAAAAATACCAGGAAATGATGAGCTCGAGTCTTTGTGCCTTTCTCATCATGGACCATTCGCACATGCAGTGCTGCACAACAAAAGATAAATCACCAGTATTAGGTGACTTTCAAAACACTAGAATTTAGGCACTTTCAACCCAGCCCAGCGCGTAGTAAGAATAAAGTAGGGGAAAACCTTACGAAAAGCCTCTTTCTTTTTTGTAAAAAATTCTGTTTTTAATAGCCAGTTCTTTAGTGATTACAGGTAAGAGGGTTTCATATTTTAGAAGTGCAGCCATGATGAAGCACTTTTGCTCATTTATTGCGAGAAGTTTAATAAGTAGTATGGTTCCATTTTCAAGAATCGAGGCACTGTTCCTT…	ARS823.5	8	524000	524400	49.05	0.03	1	TTTCATATTTT	0	524457
TTGAGCGCGATATTATATAAGAACATCCATATGAGTATATATCCTACCGTGTCTGTTCTCTACAGTGCTTCTTTTATTCAAAATTATTGGTTTTCGTAACCGCCGCGCAGGCACGCCGCGCATCTCTTTTTCTCGAAGAAAGCGGAAAAATAAAAACGAAAAAATAAAAAAAAAAAAAAGTATAAATAGTGAAGACTTTTTCCATTTGATATTTGGTAAAAATTTCGGCTGGAAGTTTTTTGCTGAACATTTAACCGGAGAATCTTGGTGGCTTTTTCTCAGTTTCGTGGGCTTATACATTTTACCTAGTATGCTGGGAACCTTTTTTTCCGTATTCTATTCTATTCCTTGCCTTACTTTTCTTATTATTTTCTATATAACCAATTTCAATAATACTTT…	ARS824.0	8	554000	554400	50.98	0.04	5	TTATACATTTT	0	554198
CACCGGATTAAACAAAAAAACTGTGTTAATCGGATCCGGGAGAAAATGCTAATATCTCCTTCTTGTTTGTGAAATGATGATAACTGGGCTGTTGAACGAAAATGAAACTTCTCAAATACACCTATTTATTAATAAATGTTAATTTATATTTTAAAAAAAGGTAAAAATTAAATGATCAGGTTTGCGATCCTGATTTCAAAATCATGGCTTGGATTATATCTTAGAGACGTATGGATTTCAAACAAATGCCTATTTGATTGAATATTACAGATCTACATTATCTCTTGTACATAAAACATTATATAACAGACATATTGATATTAACGAATATTTTCGAGCCACCATTCATGAAAGCCTAGTTAATGGATTTATGCGGTATTCATTTCGTAAACTTGACAT…	ARS905.0	9	33600	34000	47.16	0.11	2	AAAACATTATA	1	33629
TTTTTCATCAAAGACTATACCATCAAGGGGAGAATCGAAAAAAAGATGGTCTTGAACGCCAGGAATTTCCATTACATCGCACTTCTTGATAGCGTCAAACCACAATGTTCCCCAACATTTCCAAATCTCCGGAAGATTTTCATTTTCGTTATAATATTCGATCAAATCATCCAGTTCCAATGAATAAAACTTTTCCAATTCTTTTTTCAAAAAAGGGTGTAAATTATCCAGCATGTAACAAACTAATACATTACCTAAGGTCACTATTGAATTCCAAGGCATTGTCCTTCTTAAAAAATGTATCCAGAATGCTACTACTTGCTTTGAATTTACCATTTCTAATTTTTTCAAAATAGCAACTATAAAATGTAACCACGTCAAAAAGTGCGGTAAGGCAAC…	ARS907.0	9	58800	59200	33.31	0.22	1	AAAAAATGTAT	1	58708
AGGGTGAGATGGTTTCCGGCCTCAGGACGGCCTTCTCCAGTTTCTAGCGAGGCATACATTCCAACCAAAGGTGTATCAAGAATATCTGAAATTAAAGGTAGTTGAATCTCTATTTGTTGTTGTTATTACCGCTTATTATCCCATAGTTGAGACGACCAAGATTCAAACATGCAAATGTATGCACCATATCCATTCTAAACATAGTTTTTCGAACGTTCAGAGCTTAAAGGGACAATTATTTTAGAAACTGAATTTTTACCCAGTGGAATAACATCGTATCTGTAAAGTCTACAAAATTTTTTATCCATCAAAAATTAAAACAAAGAAAACTGCCAAACTGAATATGAGGAACTTTCCTCTCTAGGAATGACTTAGTGAATGTACAGTGACTTGTGGAAA…	ARS907.1	9	68400	68800	33.31	0.22	2	AAAATTTTTTA	1	68830
ATTAATTCAGTTGCCTTTTGTAGACGTACAATTGGTTGCACTGCCCAGTGTGCTAGAGGAAGGGTTAACAAAATGACAAAGACACCAATAGCGATGACAGTGCCGGTGATGATTTTTGCTAGTTTCGTTGCTGGAGAAAGGAAAACCGACTCAGGCTGTGAAACTATCGCGACCCAATTAACTAGGTTAAACGAACATGGTGAATAGCCTAAAGCAGTATTCCGTGTAGAAAGGATATTGGTTTGTTTCAAAGACCCTCCCTTCCCGTTTCTAAATGCGCTACTAATGAATGTATCATTTTTTATAGAAAAAACTTTTTGCGGGAGGTCTGATCGTGATCCATACGGTGGAAAGACAAAATGATACCCTGAAGCTTTGCCTTGACTATTATATACTGCA…	ARS907.2	9	72400	72800	33.31	0.22	2	TATCATTTTTT	0	72632
TTGGTATTGATTGATAAAAGCTGGAACCAGTCCTTCCCAGTATTAGAAGGCGAAAAACTGGATTCTTTTGTGTTAGTGATAGTTTGGGCATAACAAAAGAGTTTGTCGAAGAAGTCAAGCTTTTTGTTATCGTCACACTATCTTCCTCAAAAGCCTCATCTTCATCACCATCATCATCTTGCTCGTTAAAAGGAGTTTTTTCCTTACCAGGCAAGGGCAGCGATATTATCTTCTGTAACTGTTTAAAGGGATGAGACGGTGAAACGACATTTGCTCCTTCTTGTCCTTGTTTAATAATATTTATTATATCAGCAGCAGGCGCTTGAAGCAGCTCTTGTTCTTCTTCAGAAGTATCACTAGATGATAGAATACTTCCATTAGTCGTTTGAGAAGAGCACC…	ARS907.3	9	75200	75600	33.31	0.22	1	AATAATATTTA	0	75361
ACTCTGAAAACGAATTAGGAAACGTCATTGAAGAGTTACGAAATTTGGAGTTTGAAACTGAACATAACGTAACAAATTAATAAAATAAATGATATATAATACCCGAGCAATCTACAGCAAAGCTCAGCCCCACCTTTCCGCATTTTAATAACCTGCATTTTGTTCAATTCCACCCTCACTCCCCTTCTCAAGTATTCCAAACCAATTTAAGTAAGTATTGATATGTAGTTATTTTTAAAATAAATATATGTAAGTATATTTGGATGCTTTAATTAGGAATGTTCTATTTTTTTTTTATTTTTTATATTATGGAAGAAAATGGACGTGACGAATCAATAAAAGAAAGAACAGCGACGAAAGAATAAGAAGACGGTGGGAACAAAAAGGTATTATGACTGA…	ARS908.0	9	80000	80400	39.02	0.15	3	TTTTATTTTTT	0	80360
GGAGGCTTTTGCCCGTGCTCTGAGACAACTGCCAACCATTTTGGCAGATAATGCTGGTTTTGACAGCAGCGAACTTGTGTCCAAACTAAGATCCTCCATATACAACGGTATCTCCACCTCAGGTTTAGATCTCAACAACGGAACCATTGCCGACATGAGACAGTTAGGTATCGTCGAGAGTTACAAGCTAAAACGAGCAGTAGTCAGCTCTGCATCTGAAGCCGCTGAAGTTCTACTAAGGGTGGATAACATCATCCGTGCAAGACCAAGAACCGCCAATAGACAACATATGTAACATATTTAGGATATACCTCGAAAATAATAAACCGCCACACTGTCATTATTATAATTAGAAACAGAACGCAAAAATTATCCACTATATAATTCAAAGACGCGAAA…	ARS908.2	9	82800	84800	39.02	0.15	1	TAACATATTTA	0	84881
CAACTGTTACGAACTGATGGCTTCCAGGGCCTATGGAAGGGCCTTGTACCCGCACTGTTTGGTGTTTCGCAAGGTGCCTTATATTTTGCAGTTTACGATACCTTAAAGCAAAGAAAATTGCGACGGAAGAGGGAAAATGGGCTTGACATCCATTTAACAAATCTTGAAACCATTGAAATCACATCGTTGGGAAAAATGGTCTCCGTCACTTTGGTTTACCCTTTTCAATTATTGAAATCAAACTTACAAAGTTTCAGGGCCAATGAGCAAAAATTTAGGCTCTTTCCTTTGATAAAATTAATCATTGCTAATGATGGTTTTGTTGGACTTTATAAGGGCCTATCTGCAAACTTAGTACGGGCCATTCCATCCACTTGCATTACCTTTTGTGTATACGAG…	ARS909.2	9	98000	100000	29.74	0.12	6	TAAAATTAATC	1	98201
CTCGGGTCAATTGATGAAGATTCAGGAGCAGGTATTTCTCCAAATTTGGACATGTGCAATTGCAGCTGTCTTGTCACAGAGGCGCCTCGTCTAATCTTACTCAATTTACCAGCATTCCACTTGTTCAAAAAATCACGCCTGACTTCATCGCTAATTTTCCAATTCATCCCTTTACCTTGTTGACCAGCTCTTTTGGGCACCTTCTCGAAGGCTTTATTTAGGGACAGATTATGCCTCACGGAGTTCTGCCACGCCATTTGAGAAAACCTGTAAAATGCGTAGTTGTCAGAGATAAATTTGTAAATATCCGCTAATGAAATACTACCTTCGGGTGTTGAAAGAATGGCTTGGGTGATCATCGATGCATACGACTGTGGTGGTTTGATATATCTGTTTTCA…	ARS909.3	9	101200	101600	29.74	0.12	1	TAAATTTGTAA	1	101237
GAGGTCTTCCCGCAGTTACCTGATATAGACAATCTGGATATTCCTGTGTTCTTGCAGATCTTTCACAATTTTAAGAGGGACTCGCAGTCGTTTTTAGATGACACTGTGAAAGAATATACTTTAATCGTAAATGACAGTTCTTCTCCGATCCAACCAGTACTTTCTTCAAATTCAAAAAACTCCACTCCAGACGAATTTTTACCTAACATGAAAAGTGACTCGAATAGCGCCTCCAGCAACAGGGAACAAGACAGTGTAGATACCTACTCCAATATCCCCGTTGGTAGAGAAATAAAAATAATTCTACCACCAAAAGCGATCGCTTTACAATTCGTGAAAAGTACTTGGGAACATTGCTGTGTTCTTCTCCGATTTTATCACAGACCATCGTTCATTAGA…	ARS909.4	9	103200	104400	29.74	0.12	1	TAAAAATAATT	1	103486
CAGATGACGTCTTTATCAGGAATGACGGCGACATCCCTACTAACAGTGCATTCGATTTTAGCAGCAGTAAGAGCAATGCATCAAATAACTCCAACCCAGATACCATTAACAACAACTACAATAATGTTAGTGGCAAAAACAATAATAACAATAATATTACTAACAATAGTAATAATAATCACAACAACAACAACAACGACAACAACAACAACAATAATAATAATAATAATAATAATAATAACAATAACAATAGTGGTAATAGTAGTAATAATAATAACAATAATAACAATAATAAAAATAATAATGACTTCGGCATTAAGATTGATAACAATTCACCGTCTTATGAAGGGTTTCCCCAGTTACAAATACCGCTTTCACAAGACAATTTGAACATAGAAG…	ARS909.5	9	105200	105600	29.74	0.12	2	TAAAAATAATA	1	105428
CCAGAAACATTTGGTACGCAATCTAAAACTTCCAAGGCCTTTGCTTCGTATTCAGTAAATAGTAACCTGAGTAACGGAGAAATCAAATCAGCACCGACACCAATAAATTCTGGCCTTCTTAAGTCAATTAAAGGAAAAACATATTTTAAAATTTCCAGAGTTTGAACTCTGATCCATCCTATTTTATTGAACAGAAGACCCAGAAGGAACACTAACGTTTGAGCGGAGTACGAGGGGAAGTAGTTTCTAGATATGAAACTCACTACTTGGCTCATGAAATCTTTCTTTGATCTAAACTTGTTCTTTGCTAGAGAATCTATCAAACGGGAAAGAGAAGGTTGTTTGTACGCATTTGCAAGTTCAATTAACGAATCTGCAGCAACCTGAATGCCCGTAAAA…	ARS909.6	9	106800	107200	29.74	0.12	3	TAAACTTGTTC	1	107070
TTCGGTTCTAAATTATTCAATAGAGTGTCAAGTAGTCCAATGCCACCAGGAATATTTGCCAAATACAATACAATATCTCTAGCATACTGAACAAACAATGGATTGCAGTGATTCATTGAAGAATTTATGATGTACTCCAGCGATACGTGTATATTTTGGAAAGAATTACCCTTGCCAAGAGAAATCCATAGCTGCTCTACTTCGTTCGGTAAAGAGTCGTTAAGATCAATAGTGATGTAAAATAGGTTATTCAATACCATAAACGTGTCCAACTCTTCTAAAGATTTCAATGTAAATTTGTTTACCCAAGGTACCATAAGCACCAACAAATCTCTTTTTATTTCGAAAGGAAACAAATCAAGTATTCTAACCAAACTGGAAAATATTCTCAAACACAAA…	ARS909.7	9	108400	108800	29.74	0.12	1	TAAATTTGTTT	1	108525
CAGTTGATTTGTAAACCGTCTTTGAAGAATTTGCAAGTCTCTCCTTAAATACCTTGGTATAAGAAGAATTATGTAATTTCGTTTCAACAGCTGAAAGTAGATCAACAGCAAATGTCCTTGTATCTTCCTTATCTGCCACTAAACCATACAAACCCAAGGAGACTAATTCATCTTCATCTAAAACCAAATTATCCAATTTCAAAACGGATTTACAAAGTGTAGTGTAATATAAAACAGCTACCGAAGGATGTGAGTGGTGTGAAACACATTGGAAAGCAACATCTCTAAATAGTTTAAAATTTTCCCTATTTTTGTCCAGGAGATTCTCCAAAGCACGCACACCAAGATTTTTTACAGTAGTATTGTCCGAGTCAAATAGTGCTTCAATCCAAGCAAGTA…	ARS909.8	9	108800	109600	29.74	0.12	2	TTTAAAATTTT	0	108967
TGCATTTTGACTGCTAGAAGAAATAATTACCTCCGAATGAACAGCGTTCCTTGATAAAATCTCAATTGTAGATTTATATGGGATAGTGCGTGAAATAGAAAGGCAACATGGTATAGCTTCAATGATGGTGCCGAACAATATAACATAAAGCGACTTATTTTTACTTGAGTCATTGTCATTAGAAAAGCTAAAGCCAAATGGGCTGAATGCGTTTGATGATTGCTTTTGGTGCTGATTTTCAGGAGACCAAACTTCAGAACCGATGCTAGAATCCAATAAAAGGAATAATTTATAAAAGTAATCTGATATTTCTGTATGGTTTATGGAAGAGGCTTCTTGAACCTGATTCACTGTAATATTGTTTAAATTTAGTTCATAAAGCCTGTTATCATCCTCAGG…	ARS909.9	9	110800	112000	29.74	0.12	2	TAAAAGTAATC	1	111038
CCTATTATGAAGACCTAAATCCACATTTGCTTTCTCTCTTCATTTGCCTAATCCTTTATCCCAATTTCTACAGTTCTATATGTATTTTCCTGTGTGGCTGTCGTTTCGTGGTTAGTGATACAACCATAACGATTCAACCAACTCCCAATGTATGTGATGTTGATACCGCTAATTTGGAAGGGATGGTATACTCTAGGTGACCTCAATGAGTCAAAGAGAGCTAGGACATACTTCGAGATAGGTAATACCACTTTGCAGCTTCTTTTTAGGCCTTCATGAGTGAGTAGCCAAGAAAAAGTTAAAAGCGGGTAATAGGTATGAATTTTTCAAATACTGAAATTTGGTTTAGTTATTTAAGTGAATTGTAGATTATGTACATTTTACGTGCAATGAAGGAGT…	ARS909.10	9	113200	113600	29.74	0.12	1	AAAAAGTTAAA	1	113612
TTTTCATCTTCAGCTTTCCGGCCTCCTTTTACTGTAGCCTGTTCCTAGACAGCTAAAAATAGTACATATGCAGCTCTGCAATAGTCTCAAAGGGGATATTGTGTAGGTTTACGAAATCATCACATTTCCGAATCAGGACATGAAGGCACAACTTTCCGCACGTAGTGTTTTCAGCCCCCAGCGCCTGTCGGCGCGAAGAGGATCTGCGGAGATGAGCTTTGCCCCGCCATTACCCGTAAAATATTACTGTTTTGGGCAATTGTGGATCAAAAAGGGAAAATGCGGATGGTGAAAAAAATTTTTGGAAATTTACTGCTTCAGATGGGGGAACTTTGTAAGTTCTTCCTTTTTTTTCGTAGAGGTTGGAAAATTCAGAGTGCTAAGAAATTAAAAGGTATG…	ARS911.1	9	130000	130400	44.7	0.11	3	AAAAAATTTTT	0	130195
TACGGGCAGCAGCACCAGCTGCAACCTGGTCAGGAACGAGACCAGTCAAGAAAAAGTTTTAGTCATAGAAGGTCACAAAGTGCCAATATTTCCATGGCAAATTTTAGGTCGCCCATGCGAAATCCCCAGCCGGCTTCGTCCCAAAGGCCCGTCAATTTTCTCATTCATACACCAAAACATCCTCCTCCCACATGACGTGCAGTAATTTTCATTTTTATCACCTAATTTCTAAAACTATATCCCTTCCTAACCTTCATTCGATGCATCCGTCCACCTTACTTCAGTTCAAAAAAAAATATATATCCATATATATGCTACAGTGTTATTATTACGATTTCTTTGCCTTTACTCCTTATCTCATTTCAATCATGAATAAACAGGATATTGATAATATATGCT…	ARS911.2	9	131600	132000	44.7	0.11	6	AAAATATATAT	1	131758
CTGATGGAGAAATATAAAGGTGATAAAAACAAGGTAGCAGAACTTATTCACTCTAATTCTCATTATGCATTCAATTTAGTGGAGGCAAGGTTGCATCCAGCATTTGTGACACTTCTTCTCAGTAGCATTGGCTTTACTGCCTTTGGATGGTGTATTTCGGTGAAAACACCGCTTGCTGCTGTATTATGCACAAGTGCATTTGCAAGTTTATTTTCAAACTGTATTTTGACCTTCTCTACTACTTTGATAGTAGATCTCTTTCCGTCTAAGGCTTCTACCGCAACAGGTTGCTTAAATTTATTTAGATGTCTCCTATCCGCAATTTTCATTGCAGCACTGACCAAGATGGTCGAGAAGATGAGATATGGAGGTGTTTTTACGTTTTTGAGTGCTATAACT…	ARS911.4	9	135600	136000	44.7	0.11	2	TAAATTTATTT	1	135868
CCAGAACCAGTCGTCGGCCAACTTTTTTCTTGGAACAGCGTTACCGCACCTACGCGAGAAATAGTAGATTATAGATAAGAAATACAAGGAGAGGGGTGTGGATGAGCTTTTTTACAAAATAGTGTAAGGCGTCCGGGAAACCCCAAGAACGTTTTTTGACATCCACTAACAGGATTACCCGTCATAGATATACTGGTGCCATTACCCGTTAATGGCATCTTGTATATTTCTTTTATCTTTCTTAACATTCCTGAAAATTGGTAAACAGTAAAAAGAAAAGAAAAAGAAAGAAAAAACATGTATTATTTTGAATTTACTGGAAAATAGGCAACCATTGATTTTCGTTTTTTTATCGTTCTCATCTCTAGCTCTGGTCAGCATTTTTTACTTTATAACAAC…	ARS911.6	9	139200	139600	44.7	0.11	2	AAAACATGTAT	1	139592
GCGATGCCGCTTAAGCTTTGATTAAGAATTTTTTTCTCTTCTTTAAGTATGCCGTGCACTTTTCGCTTCTCCAAAATATGACCCAATACTCATTTGGTTATTTTTACCAAGTAATCGATCAGATAGCATTAATAGCGTGAATATTTGATGGAATAACATATTAGAAAAGCTTTAGCTGGCAATTCTTGTACTGTCTTTCGCCGAAACCTGTTTGATGACTACTTCATCAATTTTTTTTTTTTCTGCCGCATTCCAAAGGTCATAACTTTGCAAAAATAAAGGGTAAATGGTTAAAAATTGTTATCATAAATAAGGTGACCGGTTATATTGAGACCTTTCCTGGACAGTAACTAATACAGAAGCCATTGGTAATGCAATAATTTATTTGATCATGTGACT…	ARS911.7	9	142000	142400	44.7	0.11	1	AAAAATTGTTA	1	142431
GACTAGCGGTACGTTGTGCAGATGCATATCGTTCATGGAAGTGGTGGCCTGATCAATTTGCTGGTGTAACTGTTCTTGAGCAGGGGTTAGGAATTGTTGCTGCCCCATGGAAGGGACTGCACCCTGTGGCGGCATTCCCATCTGACCATAGCTCATTCCAGCTGCAGCAGGATCCTGCGGAGGCATGAATTGTGCTGGCTGTTGTAGAGGGGTGGCATTTTGTCCATACTGGAGCTGAGCTTGTGGGTAAACACGTTTCTTGTGATGAGACATTTTGCAGATGGTCTCAGACTTATATATTTATGTCTGTTTCAATGCGGCAAAAATGGACCTGAGTGCCAGATAAAACCTTTTTGTAGTGCTATTTTTGGCCTGTTTCCTGATGTACCATCCTCCTTA…	ARS911.5.1	9	160000	160400	40.58	0.06	1	TTATATATTTA	0	160180
ATTTGCATAATTCTTTGGGAAAAAGGAAAACAGTTATAGAAAAATATAAACAAAAAACCGCAACACTTCATGATTGCGTCGAACAATATACCTTAAAGAAGAAAAAAAAAGGTTGGTTTTATCACTTCATTAGTCTATTTGAATAATTCATAAAATATTTCTGATTTTTTTTTTTTTTTTTTTTTTTCATATTATTTTAAACGTGACTTTGGCTGCGATTCATGGTTTTTGCCCTTATATCTTCGTTGTCATTATTATCAGCATTATTAGGATAATCCTTTCCATGTAATAGAAAACTTTTATTTTTCAACATGGATAACTTTTCGTCCACTTTATCTATTTCAAAAATTTGCCTTGGTGTAGCCGCTGACTTCTTTACATTAGGTACATTAGAAGCCG…	ARS911.5.3	9	163200	163600	40.58	0.06	3	AAAACTTTTAT	1	163369
TCGTTATCCAAATTTGTCTGTCAGCCAAATTGAAATTTAACAAATAATATACCGTCTGCGAAGCTAAAAACCCTTGAATATTGTATGCGATGACTTTCTTTCCCACATCTATCATTTTGATGTACTGCAAATTTTCGTCATCCTCAATTGGTTCATAGGCTTTCAAGTAGTTTGCCAGGCGACTTTTAAAATCTTTTAAAGAGCTTTCAGGATCTTTACCTTTGTAATCTGGACCAAATAATTTGAGTCTAATATTTTTCTGTACCAGTGCATGATCCGAACAAACAGATTCTAAAAATAAAACCTTCAAATGAGGACTTCTCTTTCTGATTCTAGCCAGAACGTTTTTTCTTCTTTCACGAGAGGTATTTGTAGCATCAAAAATTCCCACAGATCCTG…	ARS911.5.4	9	164400	165600	40.58	0.06	1	TAAAAATAAAA	1	164842
CATATGCATGTCACATATTAGCCCTAATTGTCTAGTGGAATTTTCGCAGTAAGAATCAAATGTGTTTAAAAGTCATAGCATTGATGAACAGCTTACTCGTATCTCTCTATTTGATTTGGACAATAGCTTGAGCAAACGTTGGCAAAACAGCTGCTCTGAATAATGGTCAGCAATTAAATTTGCTTTTTTTGCGTACGGCTGTTCAGATATACTATTGTTGGAATAATAATCAATCGTCTATTGACTAATGTTTTCATACGTATTATTACTGCCTTCATGAAATAAGTAACCCTAAATTTTTATCACAACATTCTAATGTTCTTCATTTTCTGTAAAGAAAGAGCAGGACTGTGGCAGAATAGTACCATTTTCATCAGCAAATGTGAGGCTATGCCATTA…	ARS912.0	9	174000	174400	33.69	0.59	1	TAAATTTTTAT	1	174452
CCGTTAAGTGTACCGTGTCACTGTTAATGCTAAAAGCGGGATATTTCATGTTGGAGAAGGTGTCTATGATAAGGTATTTTGAGCTTGCCGTTGTGTGGGGAGAAGAACTGGATGCGTACCGAGAACGAGCAAGTTAAAACACTAGTACACGAATAATAGATATATATATGTATGTATATATATGTTGAAGTGTGTACACACGTACACGCACAAGCTACAGACGCCACGCGGCCCGGCATTCATATATGTACATACATTTATGCACATATATATATATATATATATGTATATGTAAATGTATATATACAGCTTGTGATTTCGCGCGCCGAATGGGCTGAAAAGCACAGTATAGTGGAGAAGAAGAGAGAGGAGAAGGGGAGAGGGGCAATAGCAATGGAT…	ARS912.2	9	177200	177600	33.69	0.59	1	TAAATGTATAT	1	177489
CACGCTAGATTTGCATAGTGGTTACCACCAGATCCCGATGGAACCCAAAGACCGCTACAAAACCGCCTTTGTCACCCCATCCGGTAAGTATGAATATACCGTCATGCCATTTGGCTTAGTCAATGCACCTAGTACATTCGCAAGATACATGGCTGATACATTTAGAGACCTGAGATTCGTCAATGTTTACCTTGATGATATATTAATCTTCTCCGAATCTCCAGAAGAACATTGGAAACATTTAGACACGGTACTAGAAAGATTAAAGAACGAGAACCTCATTGTTAAGAAGAAAAAATGTAAATTTGCATCTGAAGAAACTGAGTTTTTAGGCTATAGTATTGGAATCCAGAAAATAGCTCCACTACAGCACAAATGTGCAGCAATCCGAGACTTTCC…	ARS913.0	9	207600	208000	33.34	0.14	2	AAAAAATGTAA	1	208049
GTTGGACCTTTCCCACTCATCGCATCGCTAATTTTTAGTAATTTTTCATTTTTTCATGGACCAAGAAATTGAAAAGCCTGTCAATGAGCTTTAACAGTAGCAAGAAACAAAGACAAAGGACAAGCGCCTATGGAAGTCACTTTAGAAATATTGAAGTCACATTTTCATATAATATATAAATGAATTTACAGATGTGCCATTGTATATGCTGACGCAAACGCTTTCTTTTTACTGTTTAAATGACTCTTACCTTGTGATATGTATAAATCATCATATACGGCTATCTTGCTAAAAAATTTTTTTCGAGGAATTTTCACTTGAAAAAAATACTTGCGATGGCAACAAAAGAAAGTTAGATAAATCGTGCATTAAATGATGTGTCATCTGAAAGATTACAGG…	ARS913.2	9	212400	212800	33.34	0.14	6	AAAATTTTTTT	1	212342
TTTACGGTATCTCTTTTCCAGACAAAAAATTAATGGATGCTCATTTGAAGTTCTTGGCGGAAGCCTCTATGAGAGATCACAGAAAGATTGGTAAAGAACAAGAATTATTCTTATTCAATGAAATGTCCCCAGGTTCTTGCTTTTGGTTACCTCATGGTACTAGAATTTACAACACTTTGGTTGACTTGTTGAGAACCGAATACCGTAAGAGAGGTTACGAAGAAGTCATCACTCCAAACATGTACAACTCCAAATTGTGGGAAACCTCAGGTCACTGGGCCAATTACAAGGAAAACATGTTTACTTTCGAAGTAGAGAAGGAAACTTTCGGTCTAAAACCAATGAACTGTCCAGGTCATTGTTTGATGTTCAAGTCTAGAGAACGTTCTTATAGAGAAT…	ARS913.3	9	213600	214000	33.34	0.14	4	AAACATGTTTA	0	213696
ATCTTCTTTAGCGTAACAATTCATTTGAAATTTGGGTATAGCTTGATCGCTACCACGAATACCAATGACAGTTGTTGGTGTAAAAGAAAGGGATAAAAAGTGAGCCAGTGGGAACCAGTACCAGAATTGTGAGAACATGACCAAACCAACTACGGACTTGGTATCCAATGTGCCTGTATCCGCATTTTCCAGCTGAATTGTAACATTACGCCCACCGGCATTCATTATACCTTGGGCCACACATGCACCGAATTTGGCTAAACCTTCTTGGTGTTTGTTTGTAATCACGCTCAAAAAATTTTTGTTAATATCAGCAACTTGAGGGTTTAGTTTTTCTGTTTGTTGAATCAAAATCATGGATAAAGCTATCATGGCAGCCTGACGAACAAAATCTACTGG…	ARS913.6	9	218400	218800	33.34	0.14	2	AAAAAATTTTT	0	218648
TTATCAGTGCTAAACCAACGGCTAGACCACGAGTAATATTGCCATGCTGCGTTTCTTGGGAATATGTAAACATATCGTGAATCGCTTCAGGCTTACCTGTTCCGAGCATACAGAGACCCATACCTAATGCAGCTGCTTCTCCAGATGTGGCAGAATCGTTGTACAGAACTTCCTTTAAGGCTTCATAAACTTCAATATTAGCAGAACCCATAGCAGCAAGACCGATACCCAGTGAAGCACCATGTAACAATACATCTACGTCTTCATCGCCTGAAGTTCCGCTATTCTCAACTATTATGTTTTTCAGATAGTCAGTTGTATCACGACCAAAGCCAGCATAAATTAAACCCAAACCATACAATGAACCACCTTTGATAAACCTAGAAGAAGCTCGACTGC…	ARS913.7	9	218800	219600	33.34	0.14	1	TATTATGTTTT	0	219415
TTTTTTTTCCCTTGGATTCAAAGCATTATACTTTTATGTATCCAGTTTTGCCACCGAAAATAAATGAAATGCGCCCTTCTCCTATTGAAAAGCAATATGCTATTACCCGCACTAAACCCTCGAAATAATGGCAATAAGAGGCAGATCGAAAAAGCTCGACAGATTATCGTCCATGAATCGTGAGACAGCACTTTGTGGAGTTTAATGGGCAATCAAAGGCTATTTTTTTACTCGATTCCGTTTCAACATATCTTACATACTATGAAGATAGGGGAGGATTTTAAATCTATACATATATTTTTATTTATCTGAGTAATTAGTATAATAACCTGATGGAAACTTTGGCAGAAGTTTGGTTCAACTTTTCATATATATCCTTGATTTCACTTTGATTAACAG…	ARS913.8	9	220800	221200	33.34	0.14	2	ATATATTTTTA	0	221052
GAATTAAGGGTCAGCCAGTATAAACGACAGTAAATGGAATAAAAAAGGTTTATTTAGCAATACTATTGATATCGATATTTGCCGAACTTGCTAAAGACTCCCATAAAGAGTACAATTGCTCCTGCAAGCCTTCATTAACCATGTTTGCGAACCCCATTGAATGTTTACACCAAACAATTCCATTGCTTTTGTTGTCTTTGATTATGTAATTGACGCCGATATTCCAACAGTAAGTGGCTATAGTTTCTAACTCTGTTTGAAGGACACCATCTGTGTCTTGAAGACTTGATTGATTTATATTTAGGATCTTAAGAACCCTATCCAATATGCGTAGTTCGACCTCATGGTTAAGATTAATTGCATTTTCCAGTAAAATTCGCAGCCAGCTACAGAGTTCCC…	ARS913.9	9	223200	223600	33.34	0.14	1	ATTTATATTTA	0	223175
TTTCTTTATACAATAATAATGAATAATAAAGTGACGTTACTTCCCCCCAGAGTTTTTTTCTGCCTGTCATGGTCTGTCATGGTGAATATTGATCGAAGGAAGAGTGATCGCTCCGTAAATCTAGATGATCAGCATTCAAACAAACCTCCCTCTGAATCACTAATATCACTTCTATCGTTAACTTCATCTATGTCCATATCGTCACTGCTTTCATTATTGATAATAGTCGCTGTATTGTTTCCACCGCTATACATTAGTGGATTACCTTGGATAATGTCTTTCAAATCCGTGTTTTCATTTTTTAGTTTATCTATAACCTCGTTTATCATGGTGCCATTTCTGCTAATTTCGTTAACAATACTTTGTAAAATAGAACTATCCTCAAAGTGTATCACGTCC…	ARS913.10	9	228400	228800	33.34	0.14	1	TTTCATTTTTT	0	228819
TAAGTCTTCTAGCTCTGCCAAGTCTTCTGGCTCTTCTGCTGCTTCATCTGCTGCTTCATCTGCTTCTTCCAAGGCCTCTTCTGCAGCTTCCTCTTCTGCAAAGGCCTCCTCTTCTGCAGAAAAATCTACTAATAGCTCCTCCTCTGCTACCTCCAAGAACGCTGGTGCAGCTATGGACATGGGCTTCTTCTCCGCTGGTGTTGGTGCCGCTATTGCCGGTGCCGCTGCTATGCTCTTATGATTGTCACTTATTAATGATAAATTATAAAATGTTATATGTAAAAAAACAAATATACACTTTTTGAATATTAGTATCCTATTTTAATATACTGTCTCCTAGATAATACAAACTTAATTTGCTTTCTCTTCACACTTTTTTCTTTACTCTTGTAATGTACA…	ARS919.1	9	334400	334800	34.08	0.25	2	ATACACTTTTT	0	334583
AAAAACTGAGTCTGTTGGCTTTGAATGAGACTCCAGAATTACTTTCGGCATTGTTTACTTGTTATCCCGATTTGTACCCAGGATTTACAGCTTTTAATTCATTATCTATGGTCAACTTTTGCTGTCTAGTTTCATATTTACTCGCTACCGTTTCACCAACTGTAGTCATCAGTTATGGTAAAAAAATCTCCGCGACGGGGAATTGAACCCCGATCTGGCACGCGACAAGCGCCCATTCTGACCATTAAACTATCACGGATTTGTTTCTATGAAAATTTCGTTTATTTGTATAGTATATGTTTTTTTAAAATATAATGAGAATCTGGTAGAAAAGTGTTGATAACTAGCAGTTTAAAACGTATCATTTGTTGAAATAAGTACCAACTATCATCCGTCGAC…	ARS919.2	9	336400	336800	34.08	0.25	2	GTATATGTTTT	0	336449
CCCCGTTTGGAAACTGGAATGCTATGACCACTTTTATCACTACAGCTAACCACTTGTCGGAATGAAGATACGAAAGAGAAATCTTTATTGGACCACTTTTTCTTTCGCTAGAGGTCCTACCTAGCGTATTGCACCCAAGTGATTATTGCGACCTCTGAGTGTCAGAAACTTACGAAGTAAAATTCATAGTTGTGCCTTTCGTCAAGAATCGGAAAGCGTAAAAATAGGCTACGGTCTTTGTCAAGGCGAAATTTTGGAGATTTCAGACGCATGATACCAGCAGTTTTTGGTAATATACTTTTTCAGGTAAAAGCTTTCTACGGCCACTGAAAGTAATGCAGAAGCTTAAGGCTACAGATGAAATGGCCGACCCAAACTAACCAAGCACAACATCAATTA…	ARS919.3	9	338400	338800	34.08	0.25	1	ATATACTTTTT	0	338880
TAAATGGATGAAGATTTTCCTTGGTTGCATATCCCAGGGTATCCCCGTAGTAACCGCGTATGATACTTTGGGTGAGAGCGGTTTGATTCACTCCATGGTTGAAACCGAGTCTGCTGCTATTTTCACTGATAATCAATTATTGGCTAAAATGATAGTGCCTTTGCAATCTGCTAAAGATATCAAATTTCTTATCCATAACGAACCTATCGACCCCAATGACAGAAGACAAAACGGCAAACTTTACAAGGCTGCTAAGGATGCCATTAATAAGATCAGAGAAGTTAGGCCAGACATAAAAATTTATAGTTTTGAAGAAGTTGTCAAGATAGGTAAAAAAAGTAAAGATGAGGTCAAACTTCATCCACCTGAGCCAAAAGATTTGGCTTGTATCATGTACAC…	ARS919.4	9	339600	340800	34.08	0.25	3	ATAAAAATTTA	0	340041
CGACATCCGAACGAGGATACCCGTCTGGCGTCACCAACGCAGAGTCCATGCCGATGCCTTGCTGCTCAAGCACACTGAAATACGCCTCTAGTTGTGTCTCAATATCTGTCTTTAGAACCATCAATTCCGACAGTTTGAAGCTGTCTATTTGACTAATTCTTGATGTTAGGCTCGGATCTATCTTAACATTGGCCAACAATTTACTTAATTCTTCTTCCTCCATTGTAGTTCGTTCTTATTCTAATTCTTGCTCCTTTTTACTCTGGTGATAACTTTTCTATCTCTCAATGCTGAACATTTTTTTTCCCTTTATTATCCAATATTCCAACCGTTATAAAGTAAGCCTTATCGAACACAATCCACGGCGCACGCAAGGGACAGCAAATTTCGAGAATTAAT…	ARS919.5	9	343600	344000	34.08	0.25	1	GAACATTTTTT	0	343721
ACTACAGTCACTCTAGCCCTAAATATGGCATATACGGGCCGATGATCGGAAAATAGTATATCTTCACAGCATTTATATTCTAACTGTTCTAGTACTTCTCCCCTACTTAAAATCCTATCAGTCCATGCTGGTATTCTCATTTTTTCGCTCGTGTCGTAGTTTTTAGTTCCTGGGTCGAATTTATAGGTAGGTGGGAAATCAATCGCCATTTCATGGAAATATGGAAAAGACTCACCTGCGATCATTTGTTGATTAAGTTGATCCTTTTCAAATAGGCTGGCATATTCTTTAGAAACAATTTTTCGTCTAACATCTTCGTTTGACATCAATATTCTGTAATTGAAATCGCCCATCCAAATAATTGCATCGTGATCCTTTATTCGTAATCCTTTAGAAAAT…	ARS920.0	9	350800	351200	33.51	0.12	1	AAACAATTTTT	0	351239
ATTCTGAATTCCTAAAACACCCATCCCTTTTAAGTAAAATAATAATACGTGGACTACGTAGATGTGGACACTCAATTTACTTACTATTCTCTATGGTCATATTGACAATAAACAAAAATACAAGAAAAAAAAAACTACAGGAAAGATTTGTCATAAATTGTACACTACCACTTGAAAACGACCTTTGGCATATTTATGGCAGATAAATTAATGGACAAAAATTTTGAAGAACTGTGCTATTCATGCCGCACTGGTGATATGGACAATGTTGATAGATTGATTTCCACGGGAGTAAATGTGAATAGTGTTGACAAGTTTGACAATTCGCCACTTTTTCTGGCTAGCCTTTGCGGGCATGAAGCAGTCGTGAAACTTCTTCTACAGAGAGGAGCCGTCTGT…	ARS920.1	9	353600	354800	33.51	0.12	3	TAAATGTGAAT	1	354032
AAAAAAAAAATCCTTGAATAAAGGAATGAAAATATTGTAACAAGCGATGACATTTCTTTTTTTGATTGTAGTTGTGGCATTTTATATTTGCTTTTGCATTTACCCTATTCTTGAAGGTTTGGATAGACAAGCGAGATAACACCAGTTGTCCTTCAACTTATTCAAAGCAGCAGCTCACTTAATTATTATTAAGTATACACATGAAAGCCTTGTGTTTATTTCGAATCTTTTTCTTGGGTAGAACTTTTAACGTTGTCAGACGGCATGACAACAGGTTTTTGGGAAGTAGATCTAATATTTTTTGTAGAGTCTTTGGCACTGTTGAAGTGTTTTTTTTGGAAGGTTCTATTCTTGTTATTGTAAGGACTCCTATAATAATTGTTCTTATTATATCCGAAA…	ARS920.2	9	356000	357200	33.51	0.12	5	TAATATTTTTT	0	356215
GGAAACACCTTCTGGGATATAGCGGTTTCTGAAAAAATTCCAATCGTCCAAACTCAATACCATGTTATTCTTGTCAACAGTACAGCTCTTTTCTTTTTCAAGGTTGTGTTGATTTCCTCGGATGTCTTTCACATTTTTCTCGATTTTAGTTGGAAGACCACAATCATTCACAAATAAAGCCATATTAGGGCGTTCAAAATTATGAAGTGGCTTGAGTGTGGTAAGACTTTCGCCAGTGCGAATAATGGCAGTTTCCAAATCTTTTTGGCATCCATTCTGCCCTTCCGCAATGAAAACATTATTATCATCACTGACTTCTTCATCTTCAGTTTCTAATGAGGAGGAAGCTTCCTCGGTTGAATCATTCTCCAGATTATCCAAAGCTTTAAAAATCTTCCG…	ARS920.3	9	358000	359200	33.51	0.12	5	AAAACATTATT	1	358002
CTGGGCTACCAAAGGTCTTGTTGGAGCAGTAAAGATTATTTTGGCTTTTTTGGTCCAACGAAAATAATTTAACATTACTGTACTGGCAATGAACGTTTTACCCATACCCGTTGGGATGGCGCATAACGTATTTTGAAACAGTGATTTGTGAACAATTGTATACTGATAATCCCTTACCTCGTAATTTGTAGGGTACACGTAGAACGACAAAGCATCGTAATCAAGCTCATGATGAGTGGGTCCAAAACTGACATCTCTTTGAATTTCTTCGTACACAGTTTTCTGCCCAGGTAAAACGTTATCATGAAGGTCTTTTTGAACTGGTACAGCACGTCTCGTTATAGTTTCCTTCACAGATTTATTGATAGCCTTTTCATACAGTTTATCCAGCTCGTCATC…	ARS920.4	9	360000	360400	33.51	0.12	1	AAAACGTTATC	1	360249
TAACAAGTCTAATAATGAAGTGACAGAGCATAGTGACTCCGAAGACCTTACTGAAAAGCAAAAGGTACATGCTGCCCTAGATAATGAGGCAGGGGATAGAAGCCATTTTGAAGAAAAGCTCATTCCTGGAGATATGAAAGTACAGGTAGATGTTAGTAAGGACGTAGAAGAAGGCAGCCTCAATGCTCTGCCTCCATCTGGAATCACAGAATCAGACGACAAAGCTGAAAAGTTCACTAAACATCCTGAATCTAGTTTAGAAGAGCTACAGAAGCATCAAGAACAACAGGAAGAAAAAATTTTCCAAAATCCAACCGATGAAGAAAGTACTACCTCTTTGAATGAGAAACAAGAAGGCAAGGACAACATGGAAGTGAATTCTCAGCCGCAAGGACCTTC…	ARS920.5	9	361200	361600	33.51	0.12	2	GAAAAAATTTT	0	361687
CTATTGATGGGCAAAGTATTGTCGGCTGCTTGGCATGGTTCTAAATATGAAATAACATCCACTTTACGTGGCGTTTGTAAAAAAGTACTAGAAGATGACTCGGTAAGTAAGAAAACGCTTATCAGAAGAGCTGAAGCAATGAAACTATTGGGTGAAGTCTTTAAGAAAACTTTCAGAACCAAAGTCGAACAAGAAGAGGCACAGATCTTTGAAGAACTTGTAGCAGAAGCTACAAAAAAGAAGAGACATACATGAAGTTAGCAATCATCTCTTGTATATTAAAAATTCAAAAATTCACTTTTTTTTATTATCTGTATTCAATATAATATAATGTATATAAGATCACACTAATACTGATAATTCTATTCTTGAAAGAAAGACAATAGAACAATAAAGAAG…	ARS920.7	9	364400	364800	33.51	0.12	2	ATTCACTTTTT	0	364552
CCCTCGTCATCAAATGATGTGAAAAACCATCAGATAGCATTTGGTAACTTGCCCATATTTAACATAAACCCCACTTTAGAAGATTTCAAGAATGGAACGCTTATGTTTCAACAAATGGTTTCCTTGAGTATAATTCTTGGGGAAATCATGGACACATTTTACACTCAGGGATCCATGACAATAAACAAAAGCATTGAACAGGTATTGAAACTGGCAAAGCCGTTGCAACTGAAATTAAGAGAATGGTACCATTCCCTACCCAAGAATTTGTCAATGAGTTATGCCACGCCACAAAAATTGAACTCAAATTCAACTTTAACTCTAGCTTATTTTGCCACGGAAATTACGTTACATAGGAAAATTATCTGTGCCTTGAATCCTCAAACTCCAAAGGAACTG…	ARS922.0	9	401200	401600	25.73	0.2	2	AAAAATTGAAC	1	401600
ATAGCAGCTTGAGTTCCAGTTTCGAATCCTTCCCAGCTAGTCCTACCGGGCTCGTTCAAGTGAACATGAGAGTCCACAAGTCCAGGCAGAATTGTACATGGAGATACGTTCTCCAGCGTATGTATTTCATATTTGGTTATCTCAGTTTTCTCCATAACCACGGAGCCTTCTAAAACATCCAGAATCGTGCCTGATTCGGTCGAATACACAATAGTCGCAGGTTTATTTGCACCATTGATAATGACATGGTCGGAAGTGATGGCATTGATAGGCATCTTTGTTCTTCGCAGTATTTCACTTTTTTTTTGCCTATACGTTTTTGCGAAATATACACTTTTCTAACCTAATTAAAGATAGCTAAAAGAAAAAGGGGTACCTTCAATTACAAGATACCAGTAG…	ARS922.2	9	407200	407600	25.73	0.2	1	TTTCACTTTTT	0	407655
GTTAAAAGTTTTTGTTTTGATAATTGAATGTTTTCATTTCGCTATCCCCACGCTACTTTATTTACTTCTTCTTCTTCACGACAAAACATTAAAATTTACACTCTATAAAAAACAATCATATTTCTATTTATTTTTGTGAGTTGACAAATCTTATCATAGTGATTAGAATCTGTAAACCGATCTCAATCGTGTCCAGAAACAGCGTGCCATCCCTTTGGAATGTTTTCGCCAGTTTATTTTGCAAACCCGAGAATCCTGCACAACCTAATATTACAATGTCTGAATCAAGCTTTTTAATATTTTCGCGATATATAATTTCTGCTATCTGCTGGAAATTTTCTGGACTATGTAGGTCGAGGACCTGTAAATCAGTAGATACCGTACCTTTCCATAAATTTT…	ARS922.4	9	412000	412400	25.73	0.2	5	TTTAATATTTT	0	412196
GGTATCGAAGTTACATTACTGGGTTGTAACTTCAAAGATGGTCTTTCTGTAAAGTTCGGCTCTAATCTTGCCCTTTCTACGCAATGCTGGAGTGAGACCACGATCGTCACTTATCTCCCTCCCGCTGCCTACGCGGGTCAAGTTTTCGTCTCTATTACTGATACGAATAATGAAAATAATAACGATGACCTTCCCCAAGAAATTGAGATCAATGACAATAAAAAGGCCATATTTACCTATGTTGATGATACTGATAGGCAACTGATTGAATTGGCTTTGCAAATTGTGGGATTAAAAATGAATGGTAAGTTAGAAGATGCAAGAAATATCGCGAAGAGGATTGTTGGCAATGATTCTCCTGATAGCGGTACAAATGGCAACAGCTGTTCAAAAAGCACA…	ARS922.7	9	417200	418400	25.73	0.2	3	TAAAAATGAAT	1	418043
AAAGAACATCCACGATGGACTTACCGATACCTCTGGAAACACCTGTAACTAAAATAACTTTACCCATGTTTTTTTAACCTGTTACACGCTGTAGTTAGACCCTTTTTTTTAGGTACAATATTCTTCCATTGCACTTGATCTTTTTCGTTTACGTATATATATGCAAAAGTTAATGTTCATACTGTCTTCTCTTCATTTCTTTGAAAACACCGCGGAATTCCTTCGGTGATACATTCAATCCGGTTCTTGGCACAGAAATGGCCGCACAAAACTGTCGCTCATCGCAAACCCAATAAAAGTTTAGTAGCTAAAAACTATAACTATACCCTTTTACATAATATAGTTTAGTACTAGCCCTGCACCGGCCCCAGTCGCTCATCGTTGTAGCGGAGATATTGA…	ARS922.9	9	421600	422000	25.73	0.2	1	ATAAAAGTTTA	0	422011
AGAGGCCTTTTAACAAAATTGAACGGGTTGTAATGAGGATTAAGAACTTTTTTAGTTTTGTTTTGATGTACGCCCGGATTTGCTCACCTCTTCATTCTGGCTACGTCTCCTATTTACTTTTCAGGGCTAGTGCAGTATCATTGAGTCCATTGAAGAAGAAAAAGCCTCAATAATACCAAGAGTACTTTCGATCAAGCGGATTCTCAAAAAAATTTCCACTGTTACTATTTTTTTATTTTGGAGAGTGAAAATGAAATAATAATGAATGCAAATCCTCCATAGTTCGTCAAAATATCATATTTTCAAAACCTTCCATCTTTTTCTCAAACCTCTATGATTGAGTATGAGTTATCCAGTACCAGCGCCCATCACGATACCTTAAATAGTAAGAGACAACGG…	ARS922.5.2	9	428800	429200	52.68	0.06	2	TATCATATTTT	0	428869
TGGGTGCCACCAGAAAGAAGAACCGCAGATTACGATGCTGACGCCATAGACCATGACGATAGACCAATCTACAAGAGGTTCTTTTCCAGCTAATCTTCCGGTTTTTAGTAACTGGAAAAAAATACATGAACTTAATTATTTATTATATACAATATTTACTTTTTTACGCCTTAATCCTTAACGGACTATTTGTTATGCCTTATAGAACTAGAAATTATATGATAAACATGAGCTACACGAGTTGACAGGGTGAACAGATTACTATAGCATCTTTCTCTCATGAATAATTTTTAAAATGTATAAATTTTGTAACGTTCCGAAGGGTGGAGTGAAATTCCATTCAAGAAACCAAGCATTGAGACAGAACAGTACAGAGTTCAGTTGTTGCGGACCGAGAAT…	ARS1004.0	10	21200	22400	49.26	0.03	8	AAAATGTATAA	1	21398
TCAAGATCAATGAACTGAAAGTTATGTCCATAAACAAGGATATCTTTGTGCTCCTTTCTAACTTGTAAGGCCTTTTTCCAGAAAAAGAAGACTGAGTTTTTATCTTTTAACTCAGCTTCTGCGTTGATTCCGTCTCTAAATGATTCATTCATGTCAATCCATGGTTTGGCATCCTTCGAGAAACCTGCAGAAGGCTCATCAGCACTCCATGGGAATGGTGTTCTCCCATGATCTCTAGAGATCAAAGCTAATGCTTCAAAAAACTTTTTCATCTTTTCAGAATCTTCACCATAATCACGTTTAATGGCGGCATATGTACCAGTACCTTCAACGCATTTGATTTGCTCAATTTTTCTGTTTTTGAAGTTGGGCATACCCAATTCTTGTCCTTGGTAGATA…	ARS1004.2	10	24800	25200	49.26	0.03	3	AATCACGTTTA	0	24833
AACAGACTAATATCTGTGGGAGAGATTTTTATTTCATTATCATCTTCTTCGCTGGTAAGCACGTTATACTTAATAAATGGCAACCTCTCAGAAATAATTGTCATCAGTAGTCGCAGTAGCTCATATAGTTTGTCAATATCTTGTAGAAATGTTTCAGGAGTAGCATTACACTTCGAATACCCAATGATCAAGTCACTGATGATATCAACAAGCAAAAATTCTTCTTTACTGTCGCCTGTAGAAATCAGTCTGTCCATAATCTCAACAACTTCAGTAATAATATCATCCTCAAATATACTTTTTATGCACAGATTGCTCTTCAAAACATTGTGTAAAGCCGGTAAAACTTGCATCTTGACTGAATGATCATCAATATTTTTGACGATAGCCTCCAAACAT…	ARS1004.6	10	42400	42800	49.26	0.03	1	ATATACTTTTT	0	42508
GATATGTATGTTGGTCTTGTTTTATAAAAAATACTAGAACTGAAAGGCCATTAAAAAACCTTACAATTTAAGAATTGAATAGTCGATTAAGATTATTTAGATTGAAATTGACTAACTGCAAACCCATATTCAAGAATTATTTCACATCTTCCAGCGAGTAAACATGCCGCTGGTAATCGCGCGTCCTCAATATTTGAGTTTTTCAAATAGTGAGGTGTGGATGTATAGAGGAATTACACACTTTTAAGTATGTGATGTATGGGCGCACAGTACCAATTTAACTTTTTTTTTTTTTCATTTTTTAGCTTGATTTTCAAAAAACTTATGGGCGTTTTAGGCTCCGGCTCAAACTACCACCACCACGCGGCAGGCCGAGGCAAACAGTACGCCTTGGCGGGG…	ARS1005.3	10	75600	76000	37.85	0.44	2	TTTCATTTTTT	0	75596
TACTTGTGTTACTGGTAGACGATGTTCTACAAGAATGGTGAAGGGTGTGTTATATTGCTCTTTATTTAAACACGAACGAAAAAAATATCGCGTATTGCCACATTTGGCGCGTCAATATTAAAGAACGAAGGCATTATATAGGGCGACTTGTCATGATTCCAACCATGGCATGGGCGGTGGATGCTTCTCAGCAGTGGCCCATTACGTTAGTCAACGACTGTTGGCTGTCATCTGTTCTTGTTGGGTGCTTGCAGCTGCATCGACAAACATGGATGGATGCCTCTACATATATATATATATTTATGTAATGGACCTCTGAATATTTTACTATGTAACTGACTATAGGAGATACCACTGGTGCTGTAGTACAATTTAGCACTTGCAAGCGTTGACACAGTT…	ARS1006.1	10	96800	97200	34.14	0.28	1	ATATATATTTA	0	96821
GCGTAGGACAAAGCATTTCCTAAACAAGGGGAAGCTTCACCTCCATGATTTAGAAAGGTAACGTTATCAGCGGTTTTGGAACTGGACTCATAGTAGGCAAGACGGTTCCAATCAGAAGAACTTCTGCTGTTGTTGACGGTAAATCCAGGGGATGTGTAAAAAGCAAATTGTTTCAACTTCAATGGTCCACGGAAATGAACGGATAAATAGTCTGCTAGTGGAGCGTTCTTACCACTAAACCATACTCTGTCACCCACTTCGCAAGTACACGATTCATTGTTGGTGATATCTTTAAACTTATTCACATCTACGTAGGAGCCTGTAAAACCAACATTAGTGAAATCCAACTTTTGGTACGACTGAGGTCCACTGGCAGCGACTGTGTGCAACATAAACATG…	ARS1006.3	10	100800	101600	34.14	0.28	2	TAAACTTATTC	1	100751
TGTTCTGCATTATAATACAATGGGCGACCGTTTTCGTGAATGATCTCCCAGCCTGGAGGTAATCTCACCCTTCTCAAATCTATCATTTTGCTGGCTGCGACGTTTATGTCTTTCTTCGTTATCCTTTTATATGTTTCAAATTTCGACCATTTCTCCAATAACTCATCGCAGTTTGGCTTTAAAAATGGAAACTTTGCAGGGAGAGTTTTTACTACATTATCAATTTGTGACGACTCAATACCGTTTCGAGTTGTCTTTGGTAATTCCAACAAAAAATCTAAAATTCCCTTTATAAACTTTATATCATCTTCTTCAGTCTCGTTTCCTTTTCCATCTACCTGAGGTTGTTCCGTGATAAACAATTTAAGCATTTTGCTAAAACAGGTGTAACCGTGTAGT…	ARS1006.4	10	103200	103600	34.14	0.28	1	TAAACTTTATA	1	103223
GCAGTCTTGCACCTTGCGCAAATTTTGACCACCCCGTATGCACCTGCACCGACGACCCCAATAGATTTTCCGTATTTTTGTGAACAAGGTTTATGAGATGTATCGTCATTGGTTGTTCCTGCCTTGCCCTCTGTGTCATCAGAATCCTCCTGTTTATTGCTATTGCTTCTGCCTTCGCCATTGTTGCCTTTTGTATTTTCACTTTTAAGGCCCTTTCGTATTTTTTCCGATAATGCATTGATTAGCTTCAACTCTTCAACACCTACAGCAGCGTTAGGATTCACGATTTGCGGAATATTTTTACCATCGTTTTTCATCAATTCATCATTATTGCCATTTTTAAGGTTACTCGTTCTCGATTTCTTTAAAGTCTGCGATTTGATGAATCTCTGGGATGGT…	ARS1007.0	10	108000	108400	42.56	0.08	2	GAATATTTTTA	0	108169
AGCCACCAATTGCCCTTTATTTGGTTTATACCAAGGGGCTCACGTAAAAAAAAAATCGATATGCAAAATCCTTCATTTCATGATGCAAGCTTTCGAAAGTGGCGCGGCGAGCAAAGTAGAAAATCAAAGACAGAAGCGTAGAATAAAAGCCCTTTTAATGGTAGGAATACGCCTCGATAACATCATGTATGCAATCTACAAGAACAGTGAACGCCGTTCCATCTCCGTAGTAACTATACAGGGGTTGAAATTTCGTTTTCGAAGGATAGTTGTTATGTAGAAAAGAGGGAAAAAAATATGAAAAAAAAAAAATATAGATACGAGAGGAAAATACAACAAAACATTAGTCATTAGAAGTCCCGGAAAAGATCAGCATATGGGTCTTCACCTTGAACACCG…	ARS1007.1	10	109600	110000	42.56	0.08	2	AAAATATGAAA	1	109900
TAAAAATTCTCACGTTTTTCTGGCCAGAGATAGTAGATGAATATTTTTCAAGTTTTCAAGTAAAGGGATACGATATCCCCCTTGATTATTATGTCAAACTTTTACCAGATCCCGCCTTCCCTCCCCCCTAATAGCGCGAAAAAAAAGATCATCATGATTACGTAGAAAAAACCACAACAACACTATGTTGAATCATGTCATAAGCAAAGTCGTTAGGACACTGGCTTTGCAAGAACGAATAGCAGCACAGCTTCGAACAAGTAACTAAAAATATGTGGTGTATACCGGTATGTAAATGTTTTTAAGGCCCGTCCAGCGGAGGGTTCTTGTAAATTCTTAGGAAGAATGTCAACAAGATGGCAACAATACTTGTTGAGAACGGTATATACATAAACAGAC…	ARS1007.3	10	111600	113200	42.56	0.08	2	TAAATGTTTTT	1	111651
TTGCTTATATTGAGTTTTTCAATAATGTCTCTCAAAATGTTCCATCCTTCATTGGCACTAGTTGTTGCAGGTATCTCTTTAATGGGAGAAACTGACTTTCTAAACTGATTCTTGCATTCGAATTTACTTCTTGCGTAATGTCGATACTCATGATTGTAAAAAGGAGATTGCAAATTTGAATCATGGGATCCACTAGAAAAAGTACTGGTCTTGGGCAATTTAAATTGTTTGTGTCCCGTTTCTTCTTCGCCATTTTCCTCTGGAGAGACTCTGCTTTCCCTTTTCGGTTCTTTATTATTTTTTTTTTCTTCATCAGGACTGCTAGACTTCGACGTCATTCCATAATGTTGCTGCTGTTGCTGTTGTTGCTGCTGTTGCTGTTGTTGTTTTCCTGCTTCT…	ARS1007.4	10	114800	115200	42.56	0.08	1	TATTATTTTTT	0	114813
ACCAGAACTCAACCGCACTTCGTTATCCATAAATGTTGCCTTAGCCGAATGCAATACATCCCTTATAAAATCAATACAATGCGAAACTTAACACAATGCTAGTCGCTAACCACGACAAATTTCTTGCACCTCCAAATCTGCCTTTGTCCCTCTCCCACATCTTAACTATACCAGAAATGCCTCTCTGTTCTGCAAAAAACCTGTGTTCCTGCTATTAGATGAGGTAAATTCAAAACATTACATGCCATATCTTCTTCTAGACGACTACACCTCTAATTACATCAACAAATTTTAAACTTATATCGTCTAGAGTGATCCTTTCGCTAGAAATGGTAATAACTACTGCCATTGGAATCATAGTTTACAGAATATTGCGAGTTTGCTCTATATTAGATATTT…	ARS1007.5	10	116400	116800	42.56	0.08	1	TAAACTTATAT	1	116554
GAAAAAAGCTGATTGTCCTCTTTTACGAGCCGTGGATTTGCAGGAAGAAGCAACGCACGCATGGAAAACACGTGACCTGAAAGTCACCGGAACAAATTAGCCACATCGACGTTTCTTTTACTATACAGCTCGAACAAGCTAACTTGAAATGCTACAACCATGTTGGTATAATTGTGTACAGACACGTGCATTTTTGGTACGAAGAGGGTTACCCGGCTGCGAGTTTTTTTCATTATGAACTAATTCAGGGAAATAATCCCGTTCGGGAAATAGATAAACAACGCCAAACGAAAAAAAATATATAGTGCATATATGACGAGATTTAATTATCGCCAATAGGTTCTTTCTTAGGCAAAATTAAAGTTTACTCAATTTCTATTTATACATTAACTGCTATTT…	ARS1007.9	10	123200	123600	42.56	0.08	2	AAAAAATATAT	1	123616
CCACACATGATAAAGTATCAGGTAACACTTGTGCCAATTTAAATGGGTTATTTGCATTTTCTTGAATTTGATGTATTACTAACCAATATGATTATAAACCCATGTTGGTCCCACCCTATTTGTACCACTAATCTTGCACACTTAACTTATTATAATTTTATTTTTCTGTCGATGCTCCCTTGTCTGTCCACGCTTACTCAGTCCTCTTCTTTCTTCCTTTGCGCGCCATCATCTGCTATAATTTACGTACTAATTGACCCTTATCGTTTTCCATTTTGGCTTATTGATATTCTTTTATTTTTTTATCAGATTTTTAACTGAAATTCCCCTTTAAAGTCAAATTCGTTAACAATGTTTATAAAACTTTCAATCCTATAATCCTCAATTACTAGTTCTTAC…	ARS1007.5.0	10	157200	157600	46.61	0.18	2	TTTTATTTTTT	0	157287
AGAAGAATAGGTTAAAGTCATCATCATTAATAAACCAGGAAAGAAAAGAGCATAATTAAGATACGCCTACAACTTTGGCGCGTGAGCCAAGTGTCTTCTGGTAGCTAGTGAGGCACTCAAGGGACCATATGTCTTGGCATTTTCTCTATATTCCTTAAAAGAGTTGAACGAGTTGCCCGGAGATCTCTTGAAAATAGTGCTGGCCATGGCGCTAGCGGCTATCCTTGAGACACCCGCGGAGGCGGCTGAAGAAGAGACGGCGGCGGCTAATCTGGTACTTTGGGCGATCATTTAATACGTTTATTTACTGTCTTATGAATGTAATATTTAAACTTGTGCGTAATCATTAAAACAAAGGTGAAAAATCACATTAAACATCTCCCTACATTACTTTCGGTT…	ARS1007.5.1	10	159600	160000	46.61	0.18	1	TAATACGTTTA	0	159844
ACTCTCAAATATGTACCCAATAATGGAAATCCAGATGGTGGCTGTTCCACTTGCTCTTCCCAGTCCAACTGCACTGGTGCATTATCAGCAGCAGCAACAGCAGCTCCCGCAACATCATCCCTGGTACGACCTCTCGCTTTCTGAAGAAGCCCTCTCGACCTGCTGTTGTAGTTGACCTATAACTGAAAATTCACACCCGCATTACCCAGCGCGCCCGCACGTGCTCTTTATGGAAACTATAATGAATAACGACCAAAGAACATCTTTTTTTCTCTCTCACACAAATAAAGCTTTTCATGTTTATAGATATATAGCACATACTTTTACTAAGTTTTCTAGATTGATTACGACTCTTCCAGTTGCACATTTTTTCATAGCGAAAGTACAAGAGTAGGAAGA…	ARS1008.1	10	192000	192400	28.09	0.23	1	TTTCATGTTTA	0	192413
CGAAATGAATGGATATATTCTTTTTGCTACTGGCAACTGTTGAATATTTAATGTTAAAACAAACTAACTGAGGTATATTCGTATCTGTATGTACACATATACTATATACAGGAAAAGATAAGCAAGAGAGAGGATATCAACTACGAGAGCGATCGATTATATATCAAAAGCTGTCCGCTTTGCCACCCATAATCGGCGCTTAGTTTCGGAGTTCAATCATAATTCTACCACCTTACACTCAACTTACTCTTTAACTCCTATAGTATAATATCGCCACTGACCCCATATTAAAAAAATTTTTTTGCTCGATCTTCTATCCTCTTTAGGTTAATTGTCGCTGTTATTGTCTAGATTTTTTCTCGGAGATGGCGCATCTATTTGCCGTCAAAAGATCCTCTC…	ARS1008.3	10	195200	195600	28.09	0.23	6	AAAATTTTTTT	1	195286
GGCGGAAGAAGCGGCAGAGGAGGAAGAAGAGGAGGAAGAGAAGACTGAAGACAACGAAACGAATCTTGAAGAAGAGGAGGAAGACATAGAAAATAGTGACGGCGATGAGGAAGAAGGAGAAGAAGAGGTGGGGTCTGTAGACAAGAATGAAGATGGTAATGATAAGAAGAGGAGGAAAATAGAAGGGGGGTCCACGGATATTGAATCCACTCCAAAGGATGCGGCACGTTCAACGAATTAAGAATTTATGGGTTATAAGATTAATGGTACCTGCAAGAGAGGTACACTTTATAAAATGTATAAATAAAAAAATAACAGACATAAGATAAAGTCGGGTTAGGGCAACAGCTACGTAAAAAATAAAAGGCAGTAATATTTTCCATTTAAGTTGATTTTCTT…	ARS1008.4	10	196400	197600	28.09	0.23	3	AAAATGTATAA	1	197174
CATTAAACACGCTCACAAAACAACATAAAAATCCGTGATAGTTTAATGGTCAGAATGGGCGCTTGTCGCGTGCCAGATCGGGGTTCAATTCCCCGTCGCGGAGATTTTTTTTGGCCCTTGATGACTGTTCTGGTACAATTTCCACCTTGAATGAGGGTATAAGATACCGATGATATATATTCAGACTATTTCTACGACACAGAAAAACAATCGACCAAGCCGTCCTTGAACATGCTGCAGAACTTCCTTTTTTTTATTTTTTTTGGCTCATCTACGTAATCCTATTATCTTTTATTAAATTTTGAAGCTATGAGTTTCTTTCCAGCGACTTGGAACCAATAGTTGACAGTGAGTGCATACTTGAGTATTTTCCCCCTACATTGTACAGTCCTCCTCAGA…	ARS1008.5	10	204800	205200	28.09	0.23	2	TATTAAATTTT	0	204990
CCGAAGGAGGCGAAAATGAAAATCTCAGGAAGAACGCATCCAAAAAAGAAACATCGCTGTTTCAGGGCTTTAAAAGCTACCTACCAATAGCGGAGCTTGCCATTGAAAACACTGAAAGATTAAACTATGATACAAATGGTACAAGCGGTACGGTTGGTGCGAAAGATGTTATGTCTAAAACAAATGAGCGAGATGAAATTCACACAGAGCTTCCTAACTTCCAAGATTCATTTCTCATACCGCCTGGGGTAGAAACTAAAAAAATAAGCTCCTCTTATTCTCCTAGTGCATTAAAAAGTTTTTCTCAAACTCTTGTAAATAGTTTAGAGTTTTTAAATATTCAGAAAAATTCTACGTTATCCGAAATAAGAGACATTGAAGTTGAAGTTGAGAATCTGA…	ARS1008.6	10	206000	206400	28.09	0.23	2	AAAAAGTTTTT	1	205976
TGGTGAGTGGTTCACAGGATAGAACAATTAGGCAATGGGACTTACGTTCCGGGAAGTGCTTGCAAACCATTGATCTGAGCTTTGCAAATGTCTTAACAACATCCACTAATGTCGATTTATCAAAGAGCACACTTCTTACTCAAAGAAATGAGAGGCCTAGTATAGGTGCACTACAAAGTTTTGATGCAGCGCTAGCAACGGGTACAAAAGATGGTGTTGTAAGGCTATGGGATTTAAGATCCGGAAAGGTGATTCGTACTTTGAAAGGGCATACAGATGCCATAACGTCATTAAAATTTGATTCCGCGTGCCTGGTCACAGGTTCATACGACAGAACAGTTAGAATCTGGGACTTAAGAACTGGGTTGTTGAATAAGTTTCATGCGTACAGTGCGCCAG…	ARS1008.7	10	207200	207600	28.09	0.23	1	AAAATTTGATT	1	207134
CTGATTATGCTACTATGTATTTATATATGCATACATATGATGATATTATATTTGAAAAATGATGCTGATTTTTTTGAAAAAAAGATCTATCCTCCTTTATTCCCTTCTTGTTTTACTGTCCTTTGCAAACGTTCCTCAAGAGCTCGACATTTCCCGTCTAATTCATTGATATGTCTCCTATATAAATCTGTAACAAGTTCTAACTCATTTATTCTAGTTTTGAGCTTTATAATTTCTTCTTCTTTGTGCAATTTAGTGGATAACTGATCACCTAAATCTTTAGCTGGGTGATTTTCAAATTTTCGTCCAGAAACATCAGAACTAGAAACACTATTTGAGATGGATTGTGAATTTGCTTTGGATATACAGGGAGCTTTAGAAGATTGTAGAAACGGTATG…	ARS1008.8	10	209200	210400	28.09	0.23	1	TTTCAAATTTT	0	210122
TAAGCGAAGATAAGAAAATTTTCACTCTGTTCGCCCGCTATTTAGGATCAGTAATTTTAGTAACGTTAATCACTAGGAACGACGAGAAAGATGACAGAATAATATCTCATTGAAACTTGAAGTAGCGTAATTGAAATATTAAGTTCAAACTCAGAAAGGGGCAGCTATCACGAATGAATAACAATATTTTCAATGAAAGATTTCGTTCAACAGCATAGTGTTTTACTTTACAAAAATTTACATAATACTTCACCTTTTTTTTCTAATCTAAATACCTATCAAAAGGTTCCCCTAAAACGTTTTCAACAACCTTGACCAAACCGGTCCTGACTTCACGTTCGATCTCTTCATCATCATCTTCCAATAACTCAGCGATGACGGGAACGAGCTGTGGCAATA…	ARS1008.9	10	211600	212000	28.09	0.23	2	TAAAACGTTTT	0	212024
TCTGAATAAAACTTTCAAAACTTCCTTCAAATCTATATTCTCAATTATCAATGAAATTACTGACAGCCTAATGCTGCTGTCAACTTCACGGGAAAAATAAATAACATGCAAAACATCCAAAATATTTGACATCAAGAAACTTGGTATCCTTTTGATTAGACCGGCGAACAGCAACAGTATAGCAACTTGCAACTGCTCTTTTAATGGGTTACTACTATCTGCCAATGAAGCATCAAATAATTTAATAGAAGGTGGGACTATTTTTGGATAGAACGCAATTGACTTGACTCCTAAAACTTGAACACAGTTAGTTATCAATGCCAACGAAGATATCTTGACCTCTGTCATATCAGAACTAACTTTTTCAGTAGCAAGGGTGAGGGCTTGAGTTAATATGGA…	ARS1008.10	10	213200	213600	28.09	0.23	1	AAAACTTGAAC	1	213219
CAACAGGGAAAAGGCGCGAGACTTCGGCGGCAAAAAGCCACAGACAAGTGCTGGTTGCAAAGAGGTAAAGAAGTAATGTGTGTAATCAAATAGATATATTAAGGTAGCAACTCACCGGTCTGTCCATTTTCTTTTCCTGAATAACTTCTTCTGTCTTCACACATTCATTTCATTTTTATTTTCCAATATCACTCAACGAGAAAGAAGTTACAAGATCTATCTTTCAAAATAGTTTACAGTTACCTTTACTTTACCCTTTCCCTTTTCAGTTTGTTACCCCTTCTCCTAAAAGTTTTATTTTTTGGGTAAAGATATAAAGGACACTCCAGTCGGTTAAGGTGGCTGTCTAGAGAATATAAACCTGTATTTATTTACCAGGCTTATCAGAAAAGTTAATCG…	ARS1009.1	10	221200	221600	38.66	0.23	2	TTTTATTTTTT	0	221196
TTAAAGCTCTCAATGACTTAAAACCTGAAAAATACAACCTTCTGGAACCCATCATGAATCTTGATCTAACAATCCCTCAATCTGATGTTGGTACGGTGTTACAAGATCTAACAGGAGCAAGAAAGGCTCAAATTCTGTCTATTGAAGACGAATCAAGCGTGTCAAATTCTGGCGCATCCACTTGTAATTCTCCAGAGAACAGCAATAGGATATATATTCCCTCTGATGCTGTTACAACCCTACACGCAACCAAAGATAAAAAAAACACTCAAGAGACCAGTTCTAATGTAAAAAAAATTATAAAAGCGAAAGTGCCACTAAGGGAAATTACCACCTACACCAATAAGCTAAGGAGCTTATCGCAAGGGAGGGGTGAGTTCAATATTGAATATTCCGATA…	ARS1009.5	10	233600	234000	38.66	0.23	3	AAAAATTATAA	1	233598
GCACGGAATACGCAGCGTTCTCAAAATCTAATAGTTGCACTTCAAATGGTCTGAATTCCACTCTCCAACCAGGAGAATCCTTTTTGTCCGGGGTTGCTTGTTGTGTGGGGGGTTTAAAACGTAATGTCTGCCAATTTGTACTTTGGATGTTTTCAAAGTGATTTGAAGACGTTTTGTTGTCCTGATTCAACAGTTCTTCGAATGTAGATACTGGATCTCTTATGTAGAGATGCGCAAAATGTTTAGCAAGATCATAGTCCAGTGGCGCCTTATCATTCTCTAGTAGTCGTCCTAATACTTTTTCATTAATAGGTACATTTGTGTCGTTATAAGTCCTATTGAAAAATTTCGACCCACCCAAGAAAAGATCAACCGAACTATATCTTGACTTTGGTATTT…	ARS1009.6	10	235200	235600	38.66	0.23	1	TAATACTTTTT	0	235178
ACAACATTATCGATGAAAACGGTCATATACCGATGGAATCCCGAAAGAAAAGGTTTTGTGAAGGGTGGCTAGATGATTTATTTTTAGATTTATATCAAGACTTGAAATTGAGCAAGATTAGCCTAAGCAATAAAGATGAAAAACACAGCGGATTAGAGTGGGAACTTTTGGGTTTGATCATGCTGCGTACCTGGCATTGGGAAGATGCCGTAGCTTGTCTAAGAACAAGCATAGTAGCTCGATTCGACCCCGTAAGTTGCCAGCAGCTGCTAAAAATATACCTGCAACCTCCAAAAAATATTCAAGAGGTTACATTACTAGACACAGATACCATAATAAGTTTATTAATTAAGAAAATATCATATGATTGCAGGTATTATAATTATTGCCAGATATTTA…	ARS1009.5.0	10	241200	241600	49.67	0.04	4	AAAAAATATTC	1	241387
TCATACGAGTTCATACAGGATGGACTTAACGGTAAAAATAAACCATTGAATCAAGCTAAGACACCTAAAAGAACAAAAACCATAAGAACCATTGCACATGAAGCTAGTTTAGCAAGAAAAAACTCTGTAAAACTAAAAAGACAGAACACCAAAATGTGGGGTACAAGAATGGTCGAAGTGACCGAAAACCATATGGTGTCAATTAATAAAGCCAAAAATTCGAAAGGTGAGTATAAGGAATTCGCCTGGATGAAGGGTGAAATGATAGGGAAGGGATCTTTCGGTGCTGTTTATTTATGTTTAAACGTTACTACAGGTGAGATGATGGCCGTTAAGCAGGTTGAGGTCCCCAAGTATAGCTCACAAAATGAAGCCATTCTAAGTACCGTGGAAGCATTA…	ARS1009.5.2	10	250800	251200	49.67	0.04	1	ATTTATGTTTA	0	250816
GATGCGTCACCATACGATTTTAATAAAATTTTTATGAACAACTTTGAAAACTATGACTACGAAACAGATGAAGGATATGCGGAAGATGATGATGAAGAGGATAGTGACAGTGACAATAGCTTACCACTAGAAATTCCTTTTAAAAAAAGTAAAAATAAATGCAAGAATAGGAATAAAGAGCTTTCACAAAGGTTATCCCTATTTGAAAACAGAGATAGCAATTCGGTAGATTTCAACACAGATACAAATTTAAATTTAAACCCTGATTCGCCATCAGTTACGTCTTCTAAGAAAAAATATTTAGATCATATTATTTTAGATAACCGAGACATCGTTAGCAACCATGACTCCAGTAAACAAAAATTCAAGATCCAGAATATTTTGAACTCGACCTTCTAA…	ARS1009.5.4	10	268400	268800	49.67	0.04	2	AAAAATATTTA	0	268302
ACATCGGAATTGCTGGAAGCAGAGGAAGGAGCGACAGGGGGAGCAACCAAAGCTGTAGCTGTAGAAGTTGGAGTGGCAGTGGAAGCAGGAGCTAGTGTTTCGTAAGTTGTACGTGTTTGGCCGTTTTCGACATAAACTACGCCTTGCACAGTAACGACTGCAGCCTCATGGGCGTGTTCAGTGACAGTAACAACGGCAGGAGCGGCCAATGCAGACGTGGCTAAGGCGGAGGTTAAGATCGATAATTTAGAAAGTTTCATGATTTATCAATTACGGGATATTAAAAACGAAGAAAAAGTAATATCAAAGAGCGGAAGAGTGTGGCGGCCTATAAAAAAAGAATGAATTGAAATAGCTTACGACGTAGCGATAGACCTAACGGTAGCAACTAGGATTGAA…	ARS1010.0	10	290400	290800	44.64	0.07	1	AAAAAGTAATA	1	290800
GTTCTCACCATATGGGCCATCGGAATGCGTTAAGACACCCGAACAATCATATTGGTCGGCGTAGTTCTGCGCATAGGTGGCCAGAGTGTCGGACCAGGTGAGCGGCGCTGTGTCAACATGTAGCGCTCTGAACTTGTTATGCTCGTTCAGCACATCGCTCTCGAAGTTTGGAAACGTGGTTTGTGCCTTGACGGCTACTAGGCATCCTAGCAGAACTGATATTGGAAACTCCAGCATAAGCGTTTTCGTTTTAAGTTGTTTTAAGTTGTTTGGAGTTGCAGGGGTGCAGCAATTATAATTTTATGCCGATATTGGTTTGGCAACTACCGAAAAGCAAGAAGCTAAAAACTTTGAAGTATAGAATATGTTTTAGAGAATTCTTCGACCGAGTTGAAACAT…	ARS1010.1	10	292800	294800	44.64	0.07	3	TTATAATTTTA	0	294030
CAGTCGGTGCAGCCGCAACAACAAATCCCGTCCTCTTCAGGTGTTCTTCGGATTGCCAAGAAGAGGCCACCTACAGGAACCACGACAACAACAACCATTCGTAGTGCCACTAATGGATCCATGAGGGTTTCTACCCCATTGGCTAGGCAAATTTATCCTCCACCTTCTTCGAAGATCGTCTCCAACAACTCAGATGACGAAGACGAAGACATTGGTGAAAGATCCTTTTTGCCGCCTCCAACGCAGCCTCAGTCACCTCCCATAAGAATTAGTTCGGGCATTGACGCAGGTAAAAAAATAAAATCAAGCATCGTCGAGGAAGATATCGTGTCCAGATCAGCAACCGTGGATCCAGATAAAACAAAGCAGCAACGTCTATTGTCCGGAACTCCTATAATG…	ARS1010.2	10	295600	296000	44.64	0.07	2	AAAAAATAAAA	1	296031
AGCTCCATCGCAGATAATAATGGCTCTCCGGTGAAAAATAGTCCTCTCGGTGATGCCATGCCACACAATGTGCATTTAGCAGAACTTCCCAAGGCAAGCAATACCTCGATCACCAAATCTTCAAATGGCGAATCCTGGGGAAAGCAACAAGAACATCAACCACCAAGAAAGAGTTCACTGGAAACTATAGTGGAAAAGAAATCTCAGGCGGAACCTTCCGGTATTGTGGAACCGAAAAGAATGACTAATTTCCTAGATGATAATCAGGTAAGAGAAAAAGAAGATACGAATGATAAACTTTTAGAAAAGGAAATTTTGCCGACAATTCCACATAATGATCAGCCAATACTTGCATCATCTGATAAGTCTAATGGGACGTTGAAATCACTAGCTGGGAAA…	ARS1010.3	10	296800	297200	44.64	0.07	1	ATAAACTTTTA	0	296844
TCAGTTAAATCCAAGACCACCTCAAATCCGTCTAGTATACTTCATGACCTTCCAAGAAAAGTTCGTCCTTCTTTGAGTTCATTATCTGATCTTGTTTCAAGAGGCATCCCAGATGTAAAGGAAAAAACTTCTAAATCGAATGAGAAGTCACAAACAAAAGCCCCTTCAAGTAGTGATGATGAATCTAGCTCTGATTCTGACTCTAACTCCAGTTCGGACTCCGTATCGGATTCCAGTTCAGATTCTAAATCTGAGTCAGATTCTGATGACTCAGGGGATTCATCTGATGATGGAAAAAGTTTTATTAGTGCGAAATCCGCTAGTGCTGCTTTAGGTAAGAAGAAGAAGCCAAGTGGTGGATTTGCATCATTAATAAAAGATTTCAAGAAAAAATGATAC…	ARS1010.4	10	298400	298800	44.64	0.07	5	GAAAAAGTTTT	0	298704
CATAATTTCACTATCTTTACCGTTTTGGCTTTCATTGGATTCTGCATCCATGTCAACATCAATACTTTCATCATGGTCGTTAGCGTTATCATTCTTACGGTGAATAATCAACTTAGCAGTACCTCTGGGAACTAATCTTTCAAAAACAGCTTCAAAGTTTTCAGAAACCTTTTGGAAAGTAGAATCAACCGCGTTAACCTTTTGTTGTTTTAACTTAACAATTAGATCTTGAATTGAGTCTTTAGATTCATCCAGCTCTGAAGCTCTCTCCGCAAGGTCTTTGCGTCTTTCGTTAAACTTTTTGAAGTTTTCAAAAGCTCTCTTGTTTACATTCTTCAAACCAGAAATCTCTGTGTTCATATCATTCAGTCTTTGTAATAGCTGATCACTTGTGATGTC…	ARS1010.5	10	299600	300800	44.64	0.07	3	TTAAACTTTTT	0	299826
TTTCCATTGATATGGACTATGATAAATGTAAAAAACTAAGCCTGACTATTTCCAAATTGAACAAGGTGAATCCATCAAAAAGACAGATCCTGGATCCAGCAACATATGCATTTGAGAACAAAAAGTTTAGAAGTTGGGATAGAATTATTGAATTTTATTTGAAGGATAAGAAGCCATTTATTACACCAATGAAAATTCTTAACAAAGATACAAACTTTAAAAACAACTACTTCTTTTTAGAGGAAATTATCAAACAATTGATAGAAGACGTTCAACTGTCGAGACCTTTGGCAAAAAATTTATTCGAAGATCCCCCAATAACCGATGGTTTTGTCAAACCAAAATCATACTATCATACCGATTATCTAGTATACATTGATTCCATTCTTTGTCAGGCTT…	ARS1010.7	10	304000	304400	44.64	0.07	4	AAAAAATTTAT	1	304214
AAATGCGGAAGTAGCGGCATCAGCAACAGCTGCGGCTGCAGGTGTTGCCGAAGCACTACTGTCGTTCACAGGCGCGCTGTGGTGAAGGTGACCATGGATATAGGTCAGGTTGTTGTAGTTATGGATGTGCCCGTGGACAATGCCTTCTTTACCTATCGTCAGAGCATCAGGCTTGGCAGAAGCAGCAGTGGCCGCACTCGTGGCCATCGAGTCATCGCGCTTGGGGGAGTCCCTGGGAGTCAACGCATCCATTAGTTCCTATCCTTCTTCTATTTAAAAAACCGTAACACATAAAAAGTAAAAGTGTAATGCTTCCGTCTCGCCGCTGGCCTATATTCACAGTGACTGCAGTTGCATCTTATATTGCCAAGCACGTTTCATCATGACCTTTAGGGTAGA…	ARS1011.0	10	332800	333200	44.22	0.15	3	AAAAAGTAAAA	1	333107
CACCGGACAACAAAGAGTCTTCCTCAGCATCCTTAATCTTTGTAAGCAAAAAGGCACAATCTGTAATAATAGTTTGAAGCACATCATCAAAGGATGAGAGGAAAAATTCTTGGGTCTGATCGGATAAAACTATAGTAGTGTAAGAATATTCGTTGACGTTATTGGGCATACTATTTAGTCGAGCGGTACCCGTGGTTGACATCATCCCAGGATAAGACGGATTCCATAAGCCGCGTCCGCTCATATTATCAGTTGCGGATGCTGGGTTGTAGGTAGAATTCGTCGTTTGACTGAAAATTTTTTCATCATCAAGTAACTGTTTAGGAATTAGCCTTGGAATATGCCTTTCTAACAGGGACCTTATATCGTAGAAAAGTTCCATACTCTTGTCTTGTTCCA…	ARS1012.4	10	372400	372800	22.48	0.26	4	GAAAATTTTTT	0	372692
GTATTGCATAAAATGGCCGCACTTATGAGAACTGATACAAGTTGTTTACCGTTGGGGCACCAAGGTGTTATTAGTCAGAAATAAATGTAAATTTCTTATACTGCAAAGCAGAGGTACATATAACACACATCGATTGGTTCATCTTGGCTACGACTAATATTTTTGGGATGCAGGTGAATAATTAGATAATTGTTGTAATTCCATTGTTATTAAAGGCTATAATATTAAAGGTTATTTGGGTCTTTCTCTCTCTCGGCTTTATTTTATTTATAGTTTCTATCTTTCAGCTTTCAAAAAATAATATATATGGCGCTTCATGAAAAGAGAGCTAGCTACAGAAATATAAACAGTCATGGATGAATAGGCGGCGGCAGCTATGCCGGTGCATGCGCACAGTAT…	ARS1012.5	10	374800	375200	22.48	0.26	3	AAAAAATAATA	1	374966
CCACCCTTTGCGTACGATCAAACACCCTATAAAATCTATATGCAATACTGAGATATTGTATTTTTTCTCCTTTAATTGTTTATAGTTCAGAATAACAGTTCAAAAATCTATGCCGCGCTCACAGGGTCCTGCCGGGTATTCGCCCTCCAGCTTGAAAGGGGTGGCAATGCCCAAGAGCGATGTATAGTTTAGTATCAAGGAATTGAGAGAGGTATTACACCAAGGATTTCCGTGAACGAAGTGACGACGCAAGATTAACAGATTAAATTCTGGTAGTAGGCTAAGCCGTTATTAAACTTTATTTACGGTATACCACAATACTGCTCTTTTTGTTGAGGATATGACAGACAAAGGCAAGAACGATTTAACAAGCAAAGCTAAGGACAAAGCCAGAGGCAA…	ARS1013.1	10	378400	378800	32.22	0.61	2	TAAACTTTATT	1	378770
GTCCTCATATGTTTAATATGCTGCATAGTGTGAGTCCTCTAGTTTTTACCGCAGCCACCAGCCGCTTCTCGAGCAAAGTGTAGATCCCATTAGGACTCATCATTCATCTAATTTTGCTATGTTAGCTGCAACTTTCTATTTTAATAGAACCTTCTGGAAATTTCACCCGGCGCGGCACCCGAGGAACTGGACAGCGTGTCGAAAAAGTTGCTTTTTTATATAAAGGACACGAAAAGGGTTCTCTGGAAGATATAAATATGGCTATGTAATTCTAAAGATTAACGTGTTACTGTTTTACTTTTTTAAAGTCCCCAAGAGTAGTCTCAAGGGAAAAAGCGTATCAAACATACCATGTTTTTCAACAGACTAAGCGCTGGCAAGCTGCTGGTACCACTCTCC…	ARS1013.2	10	380800	381200	32.22	0.61	1	TTTTACTTTTT	0	381261
CTGTTTCTTTTTCGGCTCTTCTGATGGTTTATTTCCAACTCCAGAAGCCATACCGAAGGGGTTAAAACCAACAGGAGCACCGAATCTACTAGCGCCAGATAGTTTAGCCATTCTTTCTCTCAATGCGGCCCTACGATTCTCTTCACTATCTTCCTCTTCTTTTTCCTCATCATTATCTCCCTCTCTGTCTTCATGGCCGTAACCTATTTCGCTTTCCTCAGCAACATTTTCTCCTCTTGCCTCGTCTGCTTGTGACTCCTCAACTTTCTGATTTTCCTTTGTGTACTCATCTAAAAATTGTTCTTTCTCTATGTCATTCGTGCCTTCATCTGCTTCGCGTGAGGTTTTAGTAATCTCTTTATGTGCCAATAATTCCATTTGCGGTTCCTCGTTGTGCTC…	ARS1014.0	10	400800	402000	26.48	0.16	1	AAAAATTGTTC	1	401322
AATTGTCTTTCAAGTGGACGAGAACTACGGGAACAAAAAGTTCATATCTCTGAGGAAATTTATCATCAACGGAGTGACACCGCAGGATTTGCAAATAATTGAAAATAACGAGTTCCCTGTTTTACTGGGTGACACCCCAGAATATGGTGTCACTCAGAACACCGACGAAGGCAAGAGGAAAGTTCTCCTATCAAAGCCTCCTTACGCGTCTTCATCTACTAGTACCAAGTTTCATCCCGCTTCTAACGTCCCATCATTTGGCCAAGATGAGCTAGATCAATAAACGACAATAAAAAATTAAACGTTCTAACCCCCTGGCCCCCAGAAAATCGCGCAGATTGACGGCACTCCCTTTAAATCATAGAGTTAATCAGCTACTCACCACTCTCTTTCGGTACT…	ARS1014.2	10	404800	405200	26.48	0.16	2	AAAAATTAAAC	1	404948
CATGAGTGACAAGGATAATTCTGTGAAGGAATTTTCATTGAGTGATAAAAGCAATGTTAGTTCTGAAACGACTAATATGATGAATCAATTGCAAGTAAACGCCCATGAATACAAAAGTTCTATGTGCGAACGTCCTATCGTCGCAAGTACTTCGCCCATTGCATAGTTCTTCGCATATATAGCCACATCTCAAAAACTTACATACAGTGTATATATTTGTGGTACAGTTTCTGTATAGCCAAATATACCCTGATATAATCTTATGTGATATTATATACTTCCATCCTAATACTAAACTTTTTCGTTTAACGTGACGCATGGTGCGAAGAAAAAAAATAGCAAATCGCCACTCAATAAAGTGAGTAGAGAGCATTATATCAAAAAAGCATCGATAATATC…	ARS1014.3	10	407200	407600	26.48	0.16	1	TAAACTTTTTC	1	407393
ACAAACTGTGGAAGGTGAACCTAATTTTGAAATCGATATCAAAAGATATGTCCGTGTGGAGAAGATTCCTGGGGGGGATGTTCTAGATTCTCGCGTCTTAAAGGGTGTCTTATTGAACAAGGATGTTGTTCATCCAAAGATGTCCCGTCACATAGAGAATCCACGTGTTGTTCTTTTGGATTGTCCACTAGAATATAAGAAGGGTGAATCTCAAACCAACATAGAAATTGAAAAGGAGGAAGATTGGAATAGGATTTTACAAATCGAGGAAGAACAAGTTCAGCTAATGTGTGAACAAATTTTAGCCGTTAGGCCAACACTAGTCATCACTGAAAAAGGTGTTTCAGATCTAGCACAGCATTATTTACTAAAGGGTGGATGTAGTGTTTTAAGAAGAGT…	ARS1014.4	10	408400	412000	26.48	0.16	3	GAACAAATTTT	0	408402
TCCACTGACCGTTATTCTTAGATAAGTTATCTTCTAGCTCAGTCTTCAGATCATCATAACTAATATAATAGTAGCTGTACTGTCTAATAAGAGACTTGCTCAAGTGCTCACCAAACTTCATAGCTGTTCCTGCCTTGTTATGCTCTTTTATTGGCCGATTTGATTGTTAGCCTGTAACTTCTTTCTGATTGCCTCAATATATAAAGATAGTATTGCTTCTTTTTCATTCACGTGTGCAGCCACGTGCGGATGAATAATAAAAATGCAACATATATGCATAGTGCGGTGTGTGAAAAAGTGAACCTACAAGTCAGTAGCTCTCCGTCAAAACGCAGACAAACCAATTTTTTGTCGGTGTTTTCCTGTGCAATTCCAGTAAGTAACATATTAATACAATTT…	ARS1014.5	10	413200	413600	26.48	0.16	2	AAAAAGTGAAC	1	413563
CAAATCAATTCAAAGCACTGTACACTCATGCGTACGCAGAGATGATCTCTAGCATTTCCTCAATTGTTTTTTCGTCAAATCTTGCATCACACTCCTCCACTATGGAGTAAAGGTGGACCATATTGGCAGGAAGTTGATTGACAATCTGCAGTTTTTCAGCCTTGAATAATTTAAAAGAATTCAGTTTAGTCATCAACTCAGCAAAGCTTTCATCGCTCATTTTGCTTATACCCGATTTTTCAGCATCTTTTGCACCACTGCTTTCTCGTTCCTCGCCTTCATCTTCCTGGTTGATAAAGTTTTTGTTTATACTGAGATAGTTAACCACATTGCGAGTAATACCTTGCAATTCAGGATGATTGTAGGGCCTATTCTGCTTACCTTTCGAGCGACTTTTCT…	ARS1014.6	10	414400	415600	26.48	0.16	5	GATAAAGTTTT	0	414544
GTCTCACTCTGTTCATAAACGCAACAATACAATTACTTTTGAATATTATCTTTAATAAATACACTTAGTAGTTACCAATAAATAATAAAATCCTTTACTAATACTAATATAAGGATTTCTATGTTCTCGAGGAGAACTCGTAGTATGTTCTGTATCCCTAATATTGTAGCCCTTAACAACAATGGAATACGAACAATTTTCTTAATATTCGGCTATTTCTGAAATATACATATTCACGGGATACTAGGAGGTCAGCATGTTACAAATTTCATGATAGTGCATCAAGAGACCCTAAAATTAATATCCTTTATGTGCGTATTGCTTTCATGGTAGTAAATTATCACTGTTTTCATCTAGACGTGGGACGGTAACATTTTCGATAAATATCAAAAGATGGCA…	ARS1014.7	10	416800	418000	26.48	0.16	4	TAAAATTAATA	1	417089
AACATTATATATATCTTTACTACTATACAGGTACACATGATACAGCCTAGCAAGTTTGAAAACTTGATTGCAATTTATGACATTATATTCTGCTGTTTGCAGGTATATCTACTTTGTAAGTATAAAGATGCAAACAAATCAGTCTTCTTGGTCCCAGTTACCTGGCCTTGGGCCTTGAGGTGCTCTTGGACCACCCGCCTTCTTTGCCATGATAATTTGGTCAATGGAAAGCACAGTAGTTGCAGCTTCTGTAGCGACGTTAATAGCAAACTTTTTCGTTGCAAGCATGTCATAAATATTTTCCTCTCTGATGTCCTTTACACCTTCATCAGATTCGCCATCAATATCCACACCTTTATATAAATGATCTGTCTTAACTGCACCAGGTTCAGTTACGTT…	ARS1014.8	10	420000	420400	26.48	0.16	2	TAAATATTTTC	1	420103
ATTAGGAATGAACCAATCGGCGTGTGTTTTATATCCCCCTTATATAAGTCTAAGAAGATCGATATTCAATCTTCATTAATAAAGCCTTTTTGACCTCTACCTATGAGCAATAAACCATATCCATCAATAGTGGTCAAGCCGTAAGAATGTTTTTACCGAGAATAGAAGTAAACTTTTCTTATTGTATATAAGAAAAGCATATAAACACGCGCCCAGAGAACATATTCAGTATGCCCTAGCTTGGAAACACATCAGTAAAATACTACGGGCTAGTATAATGACTTCTATATCCAAAATTTTTAAGTTAACCTTTCAAGTAAAAGATCTTTGCCTTATACTACTGTCTGAACAACTCGTATAAATTAATGTATGATATGAACATTCCCATTGTTACGATAG…	ARS1014.9	10	422400	422400	26.48	0.16	1	AAAATTTTTAA	1	422472
TAGCTCCCTACCAATTTTTATAACATATTCATCAATATGAACGTAATTGTTGACTCTATAATCGAATGAGCATGACTCTAATATCCGAAGTTCTATTTGAAATACCCTTTTTTTAAAATTTTCCAAAATGTCCGTATTGATTTTAACCACATTCCTCAATCGTAATGACAAAGTACATATATCATTTGTTTTTTTAATTGTCTCAACTTCTTTACAGCCCAAAGTCAGGCAGCTTGTCGCTACAGTGTAGCAAACCTCGGTCTCGAAGCGATTAAAGAGGTGGTATCTTTGGTAAAAGTATACTGCTGTTTCTAAAGTCTTCCGTGGAAATTTCAGCTGAACACACAAGTCACTTAGAAATTTGAACACGGCAAGTTTTTTCTGGTTGTAATTTCGATA…	ARS1014.10	10	424000	424400	26.48	0.16	1	TAAAAGTATAC	1	423902
ATGATAGATCACAATGGGTAGCACCTCAAAGCTGGGATGTGGAAACCAAAAGGAAAAAAACAAAACCTAAAGGGAGATCGAAATCAAGAAGGTCAAGTATAGATGCTGATGAACTTGATCCCATGTCACCGGGGCCACCTTCAAAAAAAGACTCTCGTCATCATCACGATCGAAAGGATAACGAATCAATGGTCACTGCGGGTGACAGTAACTCAAGTTTTGTTGATATATGTAAAGAAAACGTTCCGAATGATAGCAAGACCGCACTCGATACTAAATCTGTGAACCGCTTAAAAAGTAATTTGGCTATGAGTCCCCCAAGTATACGATATGCTCCATCAAATTTAGATGGGGACTACGACACGTCTTCCACTTCCTCATCTTTACCGTCCTCATCTA…	ARS1014.11	10	426400	426800	26.48	0.16	1	AAAAAGTAATT	1	426804
AATGATAGCAAGACCGCACTCGATACTAAATCTGTGAACCGCTTAAAAAGTAATTTGGCTATGAGTCCCCCAAGTATACGATATGCTCCATCAAATTTAGATGGGGACTACGACACGTCTTCCACTTCCTCATCTTTACCGTCCTCATCTATTAGTTCAGAAGATACATCTTCCTGCAGCGATTCCTCTTCGTACACTAACGCGTATATGGAGGCCAACCGAGAGCAGGATAATAAAACACCGATCCTGAATAAAACGAAATCGTATACCAAGAAATTTACATCCTCTTCGGTAAATATGAATTCACCAGATGGTGCCCAGAGTTCTGGATTATTACTACAAGATGAGAAGGACGATGAGGTCGAGTGCCAACTGGAACATTACTATAAAGATTTCAGT…	ARS1014.12	10	426800	427600	26.48	0.16	5	TAAATATGAAT	1	427052
GTATTATAGGAGGACAGGTCATTTTGAGCAGTACATGTGAAAGTAGTATTTTCATACAAGTATGCAGCCTGTTGCGAAACATAGCATTTGAAAGCCTCAGTACCATCCGCTAAGGAAATAGTAGCTGTTTGCGATGAGTTTAATAGCTTAATCCTATAAACATGTGGCATTGATAATGTGAATTCATCGCCCTCCCTAATGGAAGACGCATCTGCAATACTAAAATCAAAAGTGGCAGTCCAACCTTGATCAGGTTGTTTATTTGCAGTCAGTGGAGTAATTTCTAAATTGGAAAATGTGATATCGTTGATATTTATAGCAGAGGCCAATGCCAAGGAAAAAAGCCACAGAATAATTTTGAGAAAAGTGAACATTTTGAAAACTGGCGAATTGTTGTTC…	ARS1015.5	10	444800	445200	31.68	0.1	1	AAAATGTGATA	1	444771
ATCATGATCTCTTTAGTGCCATCAGAACTATTTTCTTAACATCGCGATTCTGTCTTCCGGGTATCGCTCCAAAAATGTGCGAGGAAATAGGAGATCGTTCAAATCATCAACTTTTAGTATTGGGTATCAAAGTATCGCAGCCTGGAAACAGAATTAATCTACTGCACAAGAAGGGAATACAGCAAGAACATTCACTTCATTAATAGGACGTATTTCGCTTATGTCCGATCAAAAAGTTTTTGCCAGATATAAAGCAAATGAAATCGTCACAGATCTGCAACATTTTGGAGTAAAAAAGTTTAAATCGAATATAACAAGAAGGAAAAATGCTCTGAGAAAAATTATCGCCAATTTGGTTCTAGGAAACTATGGCGAAATGTCCGTTCTGTTTTCTGAGCT…	ARS1015.6	10	446000	446400	31.68	0.1	3	AAAAAGTTTAA	1	445986
TTAATAATACGACTACACATTATCCTATATATATATATATATGTACGCAAGTGCTTAGATTGGAAAAAAGGGTGCAACATTCTCGATTGTTCTATTTCAGCCTGTTGATATCAATCTGTCGTTCAATGCTTTGTGGGTGTGCTTTACCCACTCTTATACAGTAGTTAAGTGGCAAAAAGGGTGTCAAAGGGAAAGGAAAACCAGAGGAAAAGCAAAATAGCCGCCAATACTAACTCTAGATTTATATCATGTTATACGATTAATCAGACGCGTCTGATTAATTTCAAAAGTTAAAATATAAACTATTTTTGAAATCCCATTGCAATAAGCGAACTATAGCTGAATCTTTCCTGCAAAAATGGAAGTGAAGGGCAATGGACGCATTGTTAACAAAGTTCA…	ARS1016.0	10	448800	450000	37.34	0.08	3	AAAATATAAAC	1	449111
TTCCAATAGAGCCCAAGAATTATCTCAACAACTGCATACATACTTGATCAAAAGTACCCTTAAAGGCCCAATTCACAACGCCAGAATTATCATATGTCCTCATGCCGGTTACAGGTATTGTGGACCCACTATGGCCTACTCGTACGCATCGTTGGATTTGAACCGTAATGTTAAGAGAATATTTATCTTGGGGCCGTCGCATCACATCTATTTCAAAAACCAAATATTAGTTAGTGCATTCAGTGAGCTAGAGACGCCCTTGGGTAATCTGAAAGTGGATACAGACTTGTGTAAAACATTAATACAGAAGGAGTATCCTGAGAACGGAAAGAAGCTGTTTAAGCCAATGGATCATGACACTGATATGGCTGAACATTCCTTAGAGATGCAGCTCCCCAT…	ARS1016.1	10	452400	452800	37.34	0.08	1	AAAACATTAAT	1	452751
TGCTTTATCGAAAATCCGTGATGCCGGTCCTTCAGGCATCAAATTTCAGTGGCCTAATTATTCACAGAGTTCTCATGTGACAAGTATTGATGATAGTAGTGTCAGTTATGCTTCAGGTTATGTTACTATAGGATAATGATCACGGCTAAAACGGTCGAATGTAAGCATATATCTTTCGATTGTATAATTGTTCCCAAATACTACAGCATCTCAAGGAAAAAAAAACAAAAACTTCCAAAAAAATCGAATCCCTGAGGAATCTTTAATACATTTTCAATCTATTTAAGTTTTATAAACGTGTATATGAGATGTCATGAGCATGAATTATTAATAATAAAAACTAAATCATTAAAGTAACTTAAGGAGTTAAATTTAAGCCTTGGCAACGTGTTCAACCAA…	ARS1016.2	10	453600	454000	37.34	0.08	3	TAAACGTGTAT	1	453594
TTGTGACAGCCATGACATGATTGGATTGAATAGTTCACTTCAGCTGTCACCACCAGTTTTAGGCCCTAACACATCAGTCGAGTTCCACTAGGCTTTGTTAGCCGTAGCTGCGTTGCAACAACTGCGCAAAACGCGCGACTTCCTGTAAATGCCGCAGATCACGTGGTAAAGAAAAGAAACAACAGGCCGACCCAGTTTCGTTGTTTCTTTTCATTATTTCTGGATGCTCTTCACAACGTATTTCATGACATACTTATTGAATTAGTGGAAGCCCAAAACATCATTACCCTGGAAAACTTAATTGACGTAAATTAACTTCAGTTGTCTTATGTTTTTTGCATCCTTAACTTTAGCCGCGCAGGGATAATCATATATGTCGAAAGAGCAACTAAACAATAC…	ARS1016.3	10	454800	456800	37.34	0.08	3	AAAACTTAATT	1	455201
CTAGGACCAAGAGAAAGTTTATCGTCGCTATCTCTGGGCTGGAAGTTTTCGACATCGACATGAAAAAGCTAGCCAAGACATTTGCGTCTAGGTTCGCCACAGGGTGCTCAGTCTCGAAAAATGCAGAGAAAAAAGAAGAAGTTGTCATTCAAGGTGACGTGATGGATGAAGTGGAAACTTACATACATTCCTTGCTGGAAGAAAAAGGCCTAAAGGACGTCAAAGTGGAAACCATCGATGCTAAGAAGAAGAAAAAGCCTGCTGCAGAAGGAGCTGCCAAGTAAGCAATCCATAAATATGTAATAGCACCGTTCTGGGAGAAAAGGACTTTTTACTTGGTAACCAGGCGTGTAGGTTAGATAGTCAAACCCTATATCGTTCTTGAGATCGTCGCTCATA…	ARS1017.0	10	462400	462800	44.65	0.15	1	TAAATATGTAA	1	462425
ACTTGTTGAGCTTCTTTGCAACGCATCTCGTTGTAGAGAATTGTCTAGATGTAGCAACTTTCGTTAACAAGCCCATCTCTACTTTTTTCTTGGCTGTTTACAAAAAAATACAAGAATCCGTTACTAAAGATTACAGGCGCTACAATGCATAATAAAACTTCAGTCTCTTCTTTTGTTACATTATATAATATACTACTATATTACTGAGTCATCTGGAGAGGAAAAGAGAAAATTTTTTTTCAGGCCCGGTTCCGCTCGCAGCGAAGAACAGCGCCATTTAACTATGTGACTAGTTAATTTTTTTTCTTTTCATGGGTTCAGCGAGGACGGAATGGATACAAGAGGGAATAAGAACATAAAAAGGTGAGGTGGAGAAGCAAATGCCAACCTAACCTACCC…	ARS1017.1	10	466400	466800	44.65	0.15	3	GTTAATTTTTT	0	466416
CAAAGGAAGAGGTTATAATATCGCGTAGTAATGTTACAACTTTTAATAAAACAGAGTCGTCCGAAATTTGCTTTGAAGCTTCAAATCTACAATGTGTAAGCGCAACAACGGTTTCCCTAACGGCAATTTGAATATCATTAAATGTTTTGTTTATGATTTTTAGTGTAAAAACTTTCTGCAACGAGTCCAGAGCCAGAGAAGTAGTATAACCCGATACTGAACTAGCGCTGACTATTTCTAAAAATGGTTTCAAAAGTTCCAAGGCGTTTAATGAATCTAAACCCTTCAAGTCGTTAATTTTTAGCCGCAGCTGTACTAAACCAGATATCAGAGGATCATGATAGCTAGAAGTAGGCAAATTGTGGAAGCTGTCAACAAACGAATCACTTTGACTCAAGA…	ARS1017.5.0	10	490400	490800	32.26	0.02	2	GTTAATTTTTA	0	490543
AAGAAAAACCATTCTTTTCTCAACCCTCCCGCATCAATTCCAGGTTCATTAACAAACTCTATTCTCAGCGATTTTAATAAATCGCCTTGATGTTCCTTGATACATCTCAATGAATCATGAGAAATAACGTCACGCCGTACTTTGATTTTGAAATAAACGTCTACGGATTTGCCTTTATCCAGTGAAATTAAAAAAGCCTGTTCAGCTTCATGTTCCATGATTCTGCGAATTTCATACTCCATAATAGAGATTTTGATGCCGAGTGACAATATAAATGGATACTTACAGAATGAAAAACATTTTTTTGTCGTCGAATTTCCCCACTCTTCAATCAGTTGATTCATTTTTGTCTTTTGAGCTACTCCTCTCCAATGATCGAAATCTTGTTTATAATCTATG…	ARS1017.5.1	10	501600	502000	32.26	0.02	3	AAAAACATTTT	0	501963
CTTTTGATCCATTAATTACCGATTGAGTTAACTAAAGCCTATTTCTGGTTGTTAGTTAATGTGAAATATTATTTCGAGCTGATCTGATTGCGATGTAACGAACTTCTGCGTACTTTTCAAAATTAAGAGTTTCGCGTGTTTAACTCATACGCGTTTACTACTTCCGTCGGAAAGTTACACCGTAGTGGAAAATAGACCTATTCGTTAGTATAACCTTATTAAGGTACTTCCATTAATGAAGTGTTCTATATTGAGGCATACTGATCGAGAATTTTCATAAGGTGAAACGATAAAAATATAAAAATTAAGCTTAGCGCCGCTCGGTTTCGATCCGAGGACATCAGGGTTATGAGCCCTGCGCGCTTCCACTGCGCCACGGCGCTTAACTTTTATGAATAT…	ARS1017.5.3	10	517600	518000	32.26	0.02	3	AAAATATAAAA	1	517785
TTATTACCTCTAAAGGTTCTGCTTGATTTCTGACTTTGTTCGCCTCATGTGCATATTTTTCTTGGTTCTTTTGGGACAAAATATGCGTAAAGGACTTTTGTTGTTCCCTCACATTCCAGTTTAGTTGTCGACTGATACTGTTAATAAACTCATCGGGCGAGGCTTCCACGGTTGGAAAAGCATATGGGCTGGCGCATATGGTTATAAAATCACCTTTTTGCAATTCAATTCTATCTTTCCCATCAAAAGCCGCCCATGCTGGAGCCCTTGACTTCATCGAGACTTTCACTTTTAAATTTATACTTTCTGGTAAGATGATGGGTCTGAAACTCAATGCATGTGGACAAATGGGTGTTAAAGCGATTGCATTGACGGTTGGGCATACCAATGACCCACCTG…	ARS1018.0	10	527200	527600	28.19	0.28	3	TAAATTTATAC	1	527316
TTGAAGTGTCACCATTGCCTATCCTTTTACATTATCAATGTCAATGTTCCCTCTTCTAACAAACTGAATGACTTTTCTACACGATTCATATTATCTTCTTGCGCAGTAAATTATGTTAACGTAATAGTAGGGTCTCTTGTGCTTCATTATTTTGTAACTGTACACATAATTGACACGTTTAACAATTAGTGAGCGCAAGTGGTTTAGTGGTAAAATCCAACGTTGCCATCGTTGGGCCCCCGGTTCGATTCCGGGCTTGCGCAGTTTCTTTTCTTTTTTTCTGGAAAATAAGAAAACTTATTTATGGAAGCAAAAATGGAATAAAGGATTGGGACGAAGTTAGTGAAAAAAAACTGAAATAGTCCTAGAGTAACTCCGAAGTGTCTTTGTATAAGCTAT…	ARS1018.1	10	531600	532000	28.19	0.28	1	AAAACTTATTT	1	531919
GCTTTCTTTCCCTTTCTTTCACCGGATTTAAAGATTTATCCTGCGAGTTTGAAAGGATATCATTTCTTCGTTTATAGCACCAAGCCCTTAACTCGTCAGCAGTCACATTTGAGTCCAATGCACATAGTATATCATCCAAACAGGTGAGGTAGCCCTGATGTTTGGTTAAAGAGTTTTTCTCATTAGCCACCCGGTAAAGTCTTGTCACCGCATTGGCGGCTAGCTTGAACTCTTGAGAAAGTTCCAAATTAAGACTCTCAATCGCTTGCTTTGTAGGAGGTTGCTCTGGAGGTAAACTTGATTCCAATGAATGCATTTGCTCCATAATTGAATATATTCTGCTCTTGAATTAGATATGTGTCGTCGGTAAAAAAGGTTTCTTGAAATGTAATTGTATGA…	ARS1018.3	10	542400	542800	28.19	0.28	1	TAAACTTGATT	1	542461
ATAAACAAACATTTTATTATTTATTTTTCCCGTACATCGATGTACGTGATCGGTTTTTCTCATTCCTCTCGGATCCTTCGGGACCACCATGTCTCACCCACCAAGGTCAAAAAAAAAATAAAATCGGACGAGAAAAGTATTGGGCAAACAACAATTATCCACGTGCTTATCACGTTTTTTTATTTAATGTAGAATGTAAACCATTATACCTTAAAGATAAACACTTTGTTAATTAATCATTTTAGTTGGCGGTCATTTTCATTTCTGCTACAAGTACCAACATCAAGTGCTTAAAATATAATACGGTTTTCTACACTTTTATTAACGATGAACTCTCTGGCAAATAATAATAAGCTTTCTACTGAGGATGAGGAAATCCATTCGGCAAGAAAAAGAGGC…	ARS1018.6	10	548800	549200	28.19	0.28	1	AAAATATAATA	1	548715
CTACAACTTTGAACTGTCAGACGAACAGATGAAATTTCTTGATCATCCTGATGCTTATGAGCCTACCGATTGGGAATGCACAGACGCGCCATAAAAAGAAAATGCGAACCGTAGAATAACGTATATAGAACATATAATTAGTTTACGTTTCACAAAGTATTAATATTACATGTAGCTTTTTCAGGACTTTCGATCTAAATCAAAGATTAAAGGAGCTGCTAGAGGTAGAAAAGGAAATCATTGACTTTTCTTGAAGATTTATGAGCGGGTAACTGGAGATGGAAATTTTCAGAAAAATTGTAAATGGATGCGATGACTTCGATGTGACGTTACTAGTCTTACCATTGTAAAAACCACTATCGGTGCCAAAAGATAAGCGCAATCAACTAAGAAATTTAC…	ARS1019.0	10	612000	613200	23.04	0.31	4	AAAAATTGTAA	1	612236
ACATTCAATAACTACTTTTTCCGTATGAGGCGCTTACCTCATCAAAATGAAGAAAAAAAAAAGTATATAAGCAGCGTGATTGTCCGATCGAAATCTTTCATTTCTCACCCTCTCTCTCTTTAAACAGTCGCCCACACGTTCCCTCTTTTTTTTTTTCGATTGTTTTAGTTCCCCCCCTGCCTTTTCTTCTTTATCTTGTCCTTTTTAGTTTATCACATTTTTTTTGTTTTTGAGTATTTATCTTGTATCTAACTGTCTATCTGACTAGGAATCAATTTGTAAAGTTCTAAAAAAAAATTTAAAGGCGGCTATTGAAAATGAAATACGTTGTTGTTTCTGGTGGTGTTATCTCAGGTATTGGTAAGGGTGTTTTAGCGTCCTCTACAGGGATGCTACTGA…	ARS1019.1	10	620800	621200	23.04	0.31	3	AAAAATTTAAA	1	620720
ACACCATTTTCGTCCGTCTTTACGTTACCCATGTCACCGACATGTCTGACTTCGTCAGTTGGAGCACCATGTGTCTTCTTGAAAGGATTGAAGTGAGGACCAGCAGAGACACAACCATTGGTGGCATCTCCAAACTCATGAATGTGGAACCCACGTTCTGCGTTAGGACTGTTACCAGCGATCTCGTAAGAGACAGTGGTTGGCTCGGATTCGGAAGCCTGTTCGAACTTGACAACACCAGAGACACCGGCATCACCCTTTAACACTGCGACTGCTTGAACCATTATAAATTAATTATGTTTTATTTGTTTGCGCGATTGCTTTCTTGCCTGTTTTTCCGCAACATAGTTACAGCTAAACATTTGCCCAAAACCATCTTCTTATATATATATCTGCGAT…	ARS1019.2	10	622000	623200	23.04	0.31	1	AATTATGTTTT	0	623013
AATCCATCCAAAGTAATCAATATTAGATTTAAACTCAAATGGTCTCTCAGGCTCGAATTTCTTACCCCAGTATTCCTCCACTTTTTGCTTGAAGCCTTCGACACCCATATCATCTACAGTATACTTTAAACGAGCATGCTTACGGTCTTTACGGTCACCGTGATCTCTTTGGACAATAACGATACCTTCAAGTGGTGGAATAATGTCTTCAGTTTTAACAAAACCTAAGCATGACCCTAATCTTGGGTAAGTTTTCTTGTTGTTATGAGTGGTACCCATACCACCACCAACAAAAACATTATAACCCTCCACGATTTGAGTTTCTGGGTTAACTATAGCAACTAAACCGACATCGATAGATAATACATCCACATCGTTATATGGAGGAACGGCGATGTT…	ARS1021.1	10	680000	681200	31.67	0.26	2	AAAACATTATA	1	679940
TCATATGGAGAGGTCCAAAAGTTGCTCTCCCAGCCATTAAGGATATTCAAAAACCAAACGTAATACCAGATCTATCAATAAAAACAATAGAGGCCTCTTTTTATGATGATTGTAATACTACAAATGATAAAATTAGCACTCCCACCACTTCTAACAATGACAATCTCGAAATGAATGACTCATTGGTCTCTGTGAGATCTGCTGATAACCAAAACACATCTTTGGCGCTGGATTCGCTCAAAGGACTAAGCAAAAGGAACTCATTGAAAGATTTTACTCAAAGAGTAATTACAAAATTTATTTCGAACATAGACACAAGTAAAAATAAAAAAATAAAGTCAACATTACTCAGAGATGATGTGGATAACTCACCTTTAGGTTCAAATACACCACTACCAT…	ARS1021.3	10	686400	686800	31.67	0.26	3	AAAATTTATTT	1	686691
AAAAGCAAATTCTACTACCACGTTTATCTTTTAAAGGCATCTGGGTTTTTATTAGACAATAGGGCATCCAAATTTTTACAAAATCAAGATATAGAGTTTGACATCATGTATTCATGGGGCAAACCACAGTTCAAATATGTTCAATATATTCATCATACGGGTGCTTACGTCGCGGAATTGAGGGAAAATGGCTGCCTATTTTTAGCTCCTAACAACATTTATATATCCAGAGTGAATCCGGGAAACATAATCGGGAAAATTCATTCTGCTTCAAGCTCTTCATTAGATGCTCAAAAAGTGATCCTAAATTTCAAATCAACTTGCTTGGACTATCAGAAGTTAAGGTCAATTTTCCTTGACGCAAAGGAAATGTGGATTACAGGAAAGATTGTAGAAGAT…	ARS1021.4	10	689200	689600	31.67	0.26	1	AAAAAGTGATC	1	689204
TATAACGTGATTCCGGTTCCGGTAGTGGCTGCAAGAGCCAATGTTCAGCAACTTGTTCACATTTAGGCGCGGCCTTCGTGTACTTCAACGAAGGATCGTCTACGTCCTTAGTGGAAGGTGGTAACTTCCCATGGTTACGTTTTTTGGGCACAGACATCTGTACTTCTGTGGACTGTCAGAAAATATCTTGGTAAAATATGTATCGACAAACTTCTTAGTACAGTTAATATAGAAGTAAGGATTCGAGTGAGTAGTTTTGATAAAGCGCGTTTCATTATGCATATTTTTCATTTTTTATTTTTTTTGTCAAGAAATACACGAATAACATCACGAAATTTATCGACAGAATAATGGAAGAAACTATTTAAAAAGACGGTAGAGACTAAAAAAGGAAAGAAA…	ARS1022.2	10	700800	701200	35.38	0.04	2	TTTTATTTTTT	0	700742
ATTATAGTATAATTTTTAATATACTAGTATTGCCGACAATCTCTGAAATTTCAATACTACCACACAGAACAGGACTTGCCAGGGCCAGTCCGAGCCAGCCTAACTCCAAGACCACGTACTAAGTGAATTGCTACTCCCCCTTACCACGACTACAAAGAGCTACACGGCCTCCCGGCCTAGGCCGCTGCTACTTTCAACTGATGTCACCGAAAAAAATAACGGAAAACGACAGTTCAAGAAAAAAAGAACGCAGGAAGAAAAAGGAAGCAAAATTACAGAATGTACGGCTGTTTAAAAATAAATAGTGGATGCATGGGTGCTTCCACGCGTCTCTGGGAAAAAAAACCAGGATATTTTAATGTTTGTTTATTTGTTTATTTCCTGCTGAACTGAATATTG…	ARS1022.3	10	703200	705200	35.38	0.04	3	TAAAAATAAAT	1	703428
TTAAACCAACTAATATTTCAAGACGTTTCCGTAATGTCGGTGGATAAAAGAGAAGATATGAGCAGATCTTTCCAAAAATGTTTAAACTTGAGATACCCTATCATCCAGGCCCCTATGGCGGGGGTCACGACTATTGAAATGGCCGCTAAGGCTTGTATTGCGGGCGCCATAGCTTCACTACCCCTATCCCACTTAGACTTCAGAAAGGTCAATGATATTGAAAAGCTTAAACTGATGGTTTCACAATTCAGAGATCAAGTAGCCGATGAATCTTTAGAGGGCAATCTCAACCTAAACTTTTTTTGCCATGATATCGTTGATAAACCGACCGATCTTCAAACAGCTAACTGGGCGAAGCTATACAGAAAGTCTATGAATGTGCCGATTGATATGAATGAG…	ARS1022.4	10	707200	707600	35.38	0.04	3	TAAACTTTTTT	1	707453
TTTTAGACATTAATAAACTACTAACGGTTGCTACTACACTACACTATTCTTCTACCAATGTCGATGAGAGCGAACTCTTCAGAAAGCAGTTTACTTGAATAAATTTTTTCAAAGGCCCTCATTTCTAATGCCTTGTGACCTAGAATTTAGCAGCGTCAACTTTATGGAGCGTTATTTCTCAATTCCATCTTTGTGCCGCGTAGTTCTATCTTACATAACTTTATTTTAAGAAGAGCTTTAGTTCATGTTCTTGGAAGAATTCCTTTTTTGACACGATTTTTAACCTAAAGGCTAAATTTTATTTAAACTAACAGTGAACAAAGTATTTAAAGCTTCATATGTGAGTTGTCGAACACGTCAATAAACGGAGGTAATAAAATGAAGGATGAGGGAAAAAAA…	ARS1022.6	10	711600	712000	35.38	0.04	11	TAAATTTTATT	1	711816
CACTGCTATTGCCATAGCTTATGTTCGGTCTAAAGCGAAACATGTTTTCCCATTAGTGGGAGGAAGAAAGATCGAACATCTCAAACAGAACATTGAGGCTTTGAGCATTAAATTAACACCAGAACAAATAAAGTACTTAGAAAGTATTGTTCCTTTTGATGTCGGATTTCCCACTAATTTTATTGGAGATGACCCAGCTGTTACCAAGAAACCTTCATTTCTCACCGAAATGTCTGCCAAGATTAGCTTCGAAGATTAGTCAAATCAATAGTTTTAGTATGTTCATAATGTGAAAAATGTTTATATATACGCTTACACACACAGTTTGATGATTCAAATACTTAGAGAAAACTTTGCCGCTCATGCATTTGCAGGCATCTTTTATTGTGTTGATTTTGC…	ARS1023.0	10	728000	728400	0	0.06	4	AAAAATGTTTA	0	728297
CAATTGGTTAAATTAGTGACTAAGAAAGATATTCCGGCACATGTATCTACAATGATTCTCGAAATTTGCGCAGATGACAAGGAAGGAGAGGATGTTGAAGTTCCTTTCATTACCATTCATCTATGAGTAACTAATTAACCAAAATAAAAAAATAAATTAAATATATACATTAAATATGTATATATATATGTATGACTTTTGACAACTTTTTCTTTGGTAAAAACTTATTATTATTATTATTATTATTATTATTAATGTAGTCTCGAATATTTGAGTATGTTTTAGTTTTTTGTTTTATATTTTCTTTGGGTTTAACTGCTTTGGTTGGAAACAATTTGGAATAATTCCCCGCGATTATTATATAAAGTGTCGAAGTTACCTCGCTCAACCACTTTACCA…	ARS1102.5.0	11	42400	42800	47.2	0.32	2	TTTTATATTTT	0	42403
CAGCAACATCTGTAGCGATATGGAAACCCCGCGGATTCTCGTACGTAGTGGTTTTGATAATAGGTTTCTTACACACATATTTGTCGTTGGCATCAACACAAGTCTCAATTCCTTGGAACCATGGGTCTTCGAAGAGGTCGTCGATGGTGTAGCGGGTGGCGGCTTCTGGGTCAGCGAGCCGCCATGCCACGCGAGATGCATGTCCGTTCTTGAAATTTCTAGCCAAGTGATACTCCATTCCCGGCCCCGGGCGGTAATTGCCGCGATTGCGGAATGCGCGATCGTGAAGACGGATAAAGTTTTCATAAGCGTCACAGTAATCGCGGAAACCAGTGTCGAAGCTGCAGGATTCCAAAAATGGAATGACGTTGTTGACGAGGGTCATGAGGATAATACCCA…	ARS1103.1	11	68800	69200	30.89	0.42	1	GATAAAGTTTT	0	68890
TGTTGAACGATGCATCGATCAATCGGAGTCGTCCTCCTTTAACTTCACGAATTAGTTGCCACTCTCATTCCCCACACATAAACTTGTTTTATGGCATCCTTTTCATTTAGCATGTCTTTATTTCCAAACCTTTCCTCGTTCTTTGCATTCATTTAGCGTTTGCTCGAGAAAGCATCACGTTTTCACACATTATCGTTCGTCGCTATAATAAAAATAGTTATAGAATTTACTCAGATTTACATGTCGTACCTTTTTAATTGTAAAAAAAAAAATTTTATGATACATAATTACCTAAATATAATTCAGAATCAAACATACTTATAGCTATTTGTATGCTATTAGGTGGTCCTGCTATAAAAATATCGTTTATAATACTTTATATTTTATCTTTCAACTTAG…	ARS1105.5.1	11	145600	146000	54.73	0.03	5	TAAATATAATT	1	145668
GAATATAAAAAATATACTAAATAAAAGGATGCAACTTCCTTAAAGAGGGCAAGATAGCGACATAAAGTGGAAAAGTGTTAGCAACATTGCGCAGGCATCGATTAATATATGCATATATACTTTTTACGTAGTCTACGTTAAATTGTCAATAGATCAAGCAGAATCGGTAGCTCTGTTAAGCGATTAAGCCCAGTGGCTTTTTGTCGCACCGTTTAGGTTCGCGTTAGCAAGATGGAAAAAAAAGAACGCGAATCATGTATTGACGTATGACGTATTAGGCAATTTACAAGATTAAACTTAAATTTGCGACGGAGTTTTGAAGTAGAACGAACACCTTACTCATCCGCAACAGGAAATTTTCACGCAGAACGTGCCTAAGAAAAAAAAATCATATGCGTT…	ARS1105.5.2	11	146800	147200	54.73	0.03	3	TAAACTTAAAT	1	147025
ATAATTATACACCTTTTGAGAGGCAATTTCCTGCAATGTTTCCTCAGGTGGTGTTCCAAGTATTTGTAGAATATGATTCAAATGATCTACATAATCCTTCCCTTCAAACATTGGTTTCCTACCAAGTAGTTCGGCCAAGATACAGCCTGTTGACCAAATATCGACAGCTTTTGTGCATTCTTGATAATTCAGCAAAATTTCTGGTGCTTTATACCATATCGAGGTTATATAACCCTTAATGAAGCCGTCGTTAACCTTGTGGTTTTCTGAATAACTACACGATAGCCCAAAATTACAAATTTTTAGTTGGCAATCACTATTAACAAGTAAGTTTTTTGGTTTCAGGTCACAATGTAAAACATTAGCAGAATGTATGTATTTCAGAGCACACAGTATCTG…	ARS1106.0	11	150000	150400	42.71	0.04	1	TTACAAATTTT	0	150179
GGGAAGGCTTATGGCTAAATGAAGGTTTTGCTACTTGGATGTCATGGTATTCATGTAATGAGTTTCAACCAGAATGGAAAGTTTGGGAACAGTATGTTACTGATACCTTACAACATGCATTAAGCCTTGACTCTTTAAGGTCCTCTCATCCGATCGAAGTACCTGTAAAAAAAGCTGACGAAATTAACCAAATCTTTGATGCCATCTCTTACTCAAAGGGTGCTTCTTTATTAAGGATGATTTCGAAATGGTTAGGTGAAGAAACTTTTATTAAAGGTGTATCCCAATACCTGAATAAATTTAAATACGGTAATGCGAAGACTGAAGACCTATGGGATGCTTTAGCGGACGCCTCCGGTAAAGACGTTCGTTCTGTGATGAACATCTGGACTAAAAAAG…	ARS1106.2	11	156400	157600	42.71	0.04	5	GAATAAATTTA	0	156903
AGATGAACGATAGATAGTTTAAAAACAAGCATTTAACATAGCTCTAGATTCCGTACGCAGAGAAAGACATAGTTGCATCATCGACACATGCAATATCAAAAGTAACTCTTTTTGACTGCTGGTGTAAAAAACACTCACGATGGGGGTCGAACCCATAATCTTCTGATTAGAAGTCAGACGCGTTGCCATTACGCCACGCGAGCTAATATTTGTTTGATGTTCCAGCAGTTATATGATCTAATTATGCGGGAAAATAATTGAAGATAAGTAGTTTGATGTATTTTTATTATAGTATTATATTTTCTGATTTGGTTATAGCAAGCAGCGTTTTTTTTCTTCTTTACCATAATCATTGTACCAGGAAATTTTGTTCATAATTATTGTGTTGATTGTCAATGG…	ARS1106.5	11	162400	162800	42.71	0.04	1	TATTATATTTT	0	162651
TAGCGCTAATCTAAAAATCGATGAACTAAAGAAAGAATATACGTACGTTTTATACACAATAAATGGATTTCATAAGAAGTCCTTAATATCCTCATGCTTGTGGATACTGGAAATTAGTAAAGTAATTAACTTCCTTTTAGCATTATTCTTATTTGGCTTAAAAAGGTCACGTGAAGCTCTATTTTTTTCGTTTTTTTTTTTCACTGATGGAAGAGAAAAACCTCTACATAATAAGGTAACTTTACATATTGATTGCCAATGAGATGTTAAAAAATGGACGGTTCAGACAGTAAAATACATTTAGAAAAAAAGAGAAGGTCTTATCAGTGTATTTATTCACTGTGCATATTAGCTTTTTTTGGACTTTTTTTGTTCCATTAGTACTTTTAAAAAACCTAT…	ARS1106.3.1	11	182400	182800	48.38	0.01	1	AAATACATTTA	0	182774
GGGTTCTTGAAAAGTCCGGTTTTATTTTTTTTAAAAAGATATTGTGAGATCTTGCTATTATTAGCATCCTGACCATTAATATTTCTCCAATATGAATTGTCGTCGAAAATCTTCTTAATGCTTCCTGGACTGGTCCTAGAGACTGCGCCGGCTGTGGCGAAGAACCTGAGTAACTTATTTTGGCGGGAAGGTGACGGTATGGAGGCATTGGACCCGGCTTTCAATATTATCGTGCGAAGCATTACTGATATTACTTTCGGCGCCTTCACTTAATGTTCTGATACCTATTCCCTTACACATTTAGTCTTTGCAAGTAAATTCATCATTTGTTTTGATTTTGACGCTATATATGTATTTTTCTCACTTTTGTTCATGAGGCGGTGACGTAAAATTCGCCAT…	ARS1106.3.2	11	191200	191600	48.38	0.01	2	TTACACATTTA	0	191490
ACCTACCAATCAAGACCCTTTGCCGCTGTTGCCCCGGATGCTGCAATATGGATGTCAAAAATTTAGATACTGTCTCCTTACCATTTGTTCCCGCTATATGTAGGATTGACAAACTATCTTGGGGATTTCCCACGTGCTCCAACAAACGGTTTATTCGAGGTAAAGTTTGCCTTCCGCTTATATCATCCATCTGCTTCTTATGTAATCTGTTGCCGGCCAAACGAGCAATATTATTCTATATCAAAATCGTCAGGAAACTGGTCGACTTGACTCAAGTTTCATTAAGACAAGAATATAAATTTAAAAAATCATTATTGACCTAAATTGGGGTCCCTCCCACATCAGAGGAGGCTTCATTTTAGGCTATAGTTCCTCATATTTTTTTTCCTTGGCACACCT…	ARS1106.3.3	11	193600	195600	48.38	0.01	2	ATATAAATTTA	0	194966
GTCGTTTCTACAACGATGTTATCATGAACAAGATTGCCGCAGTAGGTGCTGCAAACGGTGTCAGAAAGTTAGTCATTGGTCAAGGCGGTTTACTTTCAACACCAGCTGCTTCTCATATAATTAGAACATACGAGGAAAAGTGTACCGGTGGTGGTATCATATTAACTGCCTCACACAACCCAGGCGGTCCAGAGAATGATTTAGGTATCAAGTATAATTTACCTAATGGTGGGCCAGCTCCAGAGAGTGTCACTAACGCTATCTGGGAAGCGTCTAAAAAATTAACTCACTATAAAATTATAAAGAACTTCCCCAAGTTGAATTTGAACAAGCTTGGTAAAAACCAAAAATATGGCCCATTGTTAGTGGACATAATTGATCCTGCCAAAGCATACGTTC…	ARS1106.5.1	11	203600	204000	50.88	0.02	2	TAAAATTATAA	1	203662
TCTTCGCGGCAGAGCCGCGCTACAGGAAAACAAGATCAAAACATGCCCCTATTGGAAGGCTTAAAAAATGCTTATCCCGAACGAGCCAACGGTAATCAACACTATCGTCATACCAACAACAGTTGAGTTATTTTTCGCTCCCATACTTTTTAGAATTGGTTTGTTTGTGTTTGGTTAAATTTCAAAGCCTTTATATTCTTTGATATAGATTACTCTACAATTTCTTTGTATACAGCGGGAAATTGACACTTCAAAGTTCCTCTCATATCAACAAACATTAATACAGTTCCTGAAAATGTATTCTTGGAAGTCAAAGTTTAAGTTTGGAAAATCTAAAGAAGAAAAAGAAGCCAAACATAGTGGGTTTTTTCACTCCTCTAAAAAGGAAGAACAGCAGAA…	ARS1106.5.2	11	205200	205600	50.88	0.02	1	AAAATGTATTC	1	205346
TTGGATAATGGCTTGGGTAAGATCAATATTAGTATTGATTATAAACCTTCCAGAAATAAACCTTTGTCCATCGATGATTTCGATCTTTTGAAAGTTATCGGTAAGGGTTCGTTTGGTAAAGTGATGCAAGTCAGAAAGAAAGATACACAAAAAGTATACGCTTTGAAGGCAATCAGAAAATCATACATTGTCTCTAAATCCGAAGTCACGCATACTTTGGCAGAAAGAACCGTTCTAGCACGTGTTGATTGTCCATTTATTGTACCTTTGAAGTTTTCTTTCCAATCACCGGAAAAATTATACTTTGTTTTAGCGTTTATCAATGGTGGTGAGTTGTTTTATCATCTACAAAAGGAAGGAAGGTTTGATTTATCACGTGCCAGATTTTATACCGCAGAA…	ARS1106.5.3	11	206400	206800	50.88	0.02	2	AAAAATTATAC	1	206601
TATTTTATTTCATATTCAATCTCCTAGTATACATGAAATATTTAACGCTTTTTTTTGCCCTTGTTTTTATTTTTTTTCTTTTTTGAAGCTGCAGAGTTACCATTGTTATTTTGCACAGCATTAGCTTTTTGCTTCGGTTCTGTAGCAGTTTTCTTAGCCGCAGGATCGCTCTTTTCGACATCTGTGTTGACAATTAAGGTGGCTAAACCAACAATGTCTTGGATGCTCTTACCTTTTATTTTTTTACTCGATTCTTTTATTTTGTTATTTTTCTTCTTCGACTGTGCTATTTTTTCAATTTTACCTGGAGTTATAGATACGCCTCGTGGGCCTAATGCACTAAGTAATCTTGAAACATCTTTACTCTTATTAGTAGTAAATTTATAGTTCAAGGATAAA…	ARS1106.7.1	11	212400	212400	46.74	0.04	2	TTTCAATTTTA	0	212388
AAAGAGCCAAACGAAACATTTGAACATACCAGGCGACAGGAGCCGACATTCCTCTATTGCAGATTCAAAAAGAAGCTCTTCTAGATATGATGGAGGCTACTCTGCCGATATAATTCCTGCTCAATTAAGGTTCATTGATAATATAGACTACGGCACGAGGCTGAGAAAAACACTTCACAGAAACTCAGTGGTTTCAAATGGGTACAATAAACTCAGTGAGAATGACCGATGGTATTTCGACCTATTCGATAGGAAATATTTCGAAAACTATCTCGAAGAACCCACATATATTAAAATATTTAAAAAAAAGGAAGGATTAGAACAGTTTGATAGAATGTTCTTAGCTCAAGAGTTGAAAATTCCCGACGTTTACAAATCTACAACCTACCAGGGAGAACC…	ARS1106.7.2	11	214000	214400	46.74	0.04	2	AAAATATTTAA	1	214168
TTCAGCCAAATGATGGGAGGTGCTGGTGGCGCTGGTTCTCCAGATATGGCTCAATTGCAGCAATTATTGGCTCAAAGCGGTGGTAATTTGGACATGGGAGATTTCAAAGAAAACGATGAAGAAGATGAAGAAGAGGAAATAGAGCCGGAAGTGAAAGCTTAAAAGGAGGAGCAAATCAACCTGGAGTGCTAGAATGAGTAACTTAGAATAAAAGACGAATATATGCACTTTACACAACTCTTTACCTGTTTGTTATTGGCTGCCTCTATGTAATTAAATATTATGGAATTAATAAAAATATTTTTATTCGTAACTATCTTAGATATATATTGTACATTGTCAAAAAGACAGTAGTAAGCAGATAGAAGCTATATTGGATGCAAAATAGAGAAAAAAGCA…	ARS1106.7.6	11	220400	220800	46.74	0.04	4	TAAAAATATTT	1	220747
CCACTACCCCGGCGTTCAGAGAAACCCCCCGGGGCAGGGGTCCGAAGTCTAAAAGTTTAATCCGGAAGTAGCGACGGGGGGGAAGCCCGCCGCGCACAGATGGCCAGCACAACGGAGCGGGGCCGAGGCGGCAAACGAGGTTAAGCCCGCTGAACCTGAAAAAAAAAACGAAAATTTTCTTTCATCAAGGACTAAAGTTTTCTTATGTTACGGATCTTGCACGCGGTAAGCAATGGCCGTAGCCTTTTCACAGTTGCTTCCAAGTGTCATGTATCGATTTTGCAGATTGTTCTAAAAGTAAATGGATTGCTATTTTCTTTCCGAGACTACTCTAAAAAAATTTATTGAGTATGAGATCGTTTTTAGATAAATTATATATATTGTAAAGCTATTAACTAA…	ARS1106.7.9	11	231200	231600	46.74	0.04	7	TAAAAGTAAAT	1	231389
CAGAAGATTGCTTTTCCCACGCCTGTTTTACGTCTCCAGGGCACTTGAAACAATGCAGCGATCGCCGCCACAACACGCCAAAGAGAAGCGAAAGTGGGCCTGGGCGGCCTCAGTTTCGGCAGAGGTAAACAACACGAACTGAACTGCCTTAGCTCCGAAGGGCAATTCCACAGGCACTCCGCGGGGCCCGGCCAAGGCCCAAAAGGCGTGGAATATGCGCGTTTTGGGGCCATAACACCCAGTACCACGGCCGGAACGGGCCATATAATAAGTTTTTCACTCTCAAGAATGGTAAACGTAAATAGGAACATCCCACTACCCTAGAAATTGCGGAAATTTCGCGCTTATCATTAGAAAATCTGGAACCGTCCTTTTTCCTCTTTCTTGCATTTCCCTTTC…	ARS1107.0	11	258400	258800	43.92	0.59	3	TAAACGTAAAT	1	258537
TACTGATGGACAAATCCAAGCTCCAAACACAGTTTACGAACAAACAGAAAATGCAGGTGCCAAGGCTGCCGTCGGCATGGGTGCTGGTGCTCTAGCGGTCGCAGCTGCTTACTTGTTGTAAGTACGAGAACAAAACCTGCATGTTTTATTTCCTTCAATATAGCTTTCTACATAATGATCACTTACATATAGCGTAATGTAATATGAAATGGCCCATAATATTCTCTTACATTGTCCTCCTACCTACATTCCTTTTCTTGCATGCAGCTCTCACATTCCCCGATTCGCTTGAAAAATTTAAACTTGTAGAAAAGTAGGTGAATGTCCCGCCGGCGGTTTCTCTGCTGCATGTAGAAAGATGGATATACAGAAAAGGAGATAAGAGTAGCTATCTCAAGT…	ARS1107.2	11	261600	262000	43.92	0.59	2	AAAATTTAAAC	1	261665
AAGGCATTTAATGTAATTTATAGAGCATTATAAATCGTAACAACTACTGCAGTATGAGTTTCATGGATTCATTTCTCAATATCTTATGAATATACACAGGTATATATGTATATTCATGTTAAACGCCTTTCGAATTGTTCGTTGGCTTTTTTTGTGAAATTATCTCGGGAAAAGGGCGAAATTATATTATTTTGCCGTTGACATTTTGAAAAGGAATAAAAGATCATGAAAAAAATAAGAAAGGCAATTCGACGCATTTCTCTCAGCAAGCTATTCTTTACTTTTGAAGAACAAAATATTTTAGCAAAAAGGTTAAGACAATATAGTCGGAAGCAGTTCTGCGGGATCTGAAGGAATTGCGGAATAATGAGATTTCACGATAGTATACTTATCTTCTTT…	ARS1107.5.0	11	290800	291200	42.32	0.06	1	AAAATATTTTA	1	291021
TCAGATGAAGATTTCGATCCACTACAATACGGTATTTTATTATACATCACTAAGGGTTCAAAAGTGTTTAAGCCTACTAAGGAGCAACTGGCTTTAGACGATGCAGGTATAACAAATGATCAGTGGTATTATGTTGCATTATCTATCCCTACTGTCGTGGTGGTATTTTTCGTCTTCATGTACTTTTTCTTATATGTCAACGGGAAAAACAGAGATTTCACAGATGTTACTAGAAAAGCTTTAAACAAGAAACGCCGTGTTTTGGGTAAGTTCTCGGAGATGAAGAAATTCAAAAACATGAAAAATCACAAGTACACCGAATTGCCATCTTATAAGAAAACCAGTAAACAAAATTAGATTCCCTTCGAAGTATGCATTCACCCTTCCTCGAGAGGGCTG…	ARS1107.5.1	11	292000	292400	42.32	0.06	1	AAAACATGAAA	1	292209
GCTCTGTAAGAGTTGGGAAAAGGTTTTTATGGCTTTTGACCATTTCATCTCTCAAAGCAGTAGATCCAGCGCTATCTGCTCCTTTAGTAGAATTTTCCAAACTATTATCTGTTGAAGACGCCTCTGAGTTCTTTTCACCATCTGTCTTATCTAGCCAGTATTCCGGACCACCCTTTTCAGACAATGTCACCAATAAAAGGAAGAGTTTTACTTTAACCCACGGGTTTAGCGAGTTTACATAGGCGTCCGTAATTTTGCTAACATCGATATTTATTTTTCTATGGATGCATTTGATAAATTTTTCAATGTAATGTGATTTTTTCAATCCGTATTTTTCATTCAGATATCCAACCGAAGTGATTACGTCGTAATTTGTATTTTCCATGTTCGTATGCTTCA…	ARS1107.5.2	11	293600	294000	42.32	0.06	1	GATAAATTTTT	0	293666
TCTTCTAATCTTTTTTTCTTTTGAAGCACCCAATTTAAGACATCTTTTACAGGTACAGTCCTTTAACGATGGCTCGTTGGCCGCTTGCTTGGGCAATAAATCTTTAGCCATCTTCTTTGGCGCGCTATACTAGGCTTGATTTATAATGTTAGTTATTCCAAAAATGTGAAGGAAATTGATCAAGGCAAGCTCTAATGATGATTATTGACCCATGCAACAAAAAAAGTTTGAATTCTCTTAATTTTCCAGATCGCAAGTTAGTAGTCAATCTGCTAACTTTCGTTATATTTCAAAAAAGTAATTGTACAAAAAAAGTCACCAAAAACGAGGACTTTTTTCACTGCGTTAAAGATTAGATCTACATAATGAATACTCAATTCTTTACTTAATTTCGCTCTA…	ARS1107.5.3	11	294000	295600	42.32	0.06	3	AAAAAGTAATT	1	294132
GGGAAATATATGGGAAACGATACCACGGCATTGATAAGCCGAAGAATGAAACGATCCTTGGTCCGACTACGGTGGCATCACTACTTAGTCTTGTATTGACTTGTTACTTCAAATTAATGGTAGAAGATTGCATGTCAGCAAAAGATCCGTTTGATGAAGAAGAGTTTTATTCTGGTCTTTATGCATTTCAAAAGAAATACGGCCTATCCAAAAACAATAAACAGACCTCCTTAGACGAACTAACAATTGATAAATTATTTGAAGTATCTTCCAAGACTTCAAACAAAGATATTTTCAAGTTTAAAAAGGTTGTGAAGTCAACTGTTCAAGACATGACTGGCAAAGGAAACTTTATGCATCTATCCAATGAGATCCTAACAACTGATTTAGATACCCTGG…	ARS1107.5.5	11	299600	302800	42.32	0.06	7	TTTCAAGTTTA	0	300288
TCCTGTATTCAATAAGCAAGTTCCCCATTTCAATTGATCTACACATCACTGCGCGTTAAAGCGCACCTAATTTATTCGGTAGGAAACAGAAATAGTCTGCAAAGTCATTCAAGCACCTTTCTTTACCAAATGAAAGGATTTAATAGTACCTATGAAACAATAGTTCGAACTTTTGCCATTTCCCGGTTTTTTTGGCCAGCTTGTATAAAAGTGCACCTTACCCTTATATTGGGCTCTTATTGAATGCCTTCCGAAGAACTGACTATTCAAAAAATAGAAACAAGTACGTCAATAAAAAATTTTGCAATTCTACGAATAATTATTCCTGTTTCTTTAACCTGGTAAAAAAAAGTACAAACACTTAAGCTTTTTGAAACAGCTTTATTTTGCTTCATTAAA…	ARS1107.5.6	11	303600	304000	42.32	0.06	1	TAAAAAATTTT	0	303933
AATACAGTTATAACCTCTATTCGTGGATCACCTTCATTACCCAAGAACAAACAAGTGGAAGATTTAGCAAAAATCAGGAAGAATATCCATATTGTCCAACTTGACCTTACAAAGGACGAAAGTATTGGCAATATTGCGGACGAGATCAAGAAAACGCCATTCTTCTTGGGTATTGATATTTTTATCGCATGTTCTGCAGTATCTGATTCTTATTACAAGGTCCTGGAAACTCCCAAATCAGTCTGGCTCAACCATTATAGCACAAACGCTCTGGGTCCGATACTAGCCCTTCAAAAAGTTTATCCACTGCTTCTTTTGAAAAAGACGAGGAAGATATTCTTTATCTCTAGTGTTGCAGGATCTATCAATGCGTTTGTACCACTTTCTGTTTCCGCTTAT…	ARS1107.5.7	11	304800	305200	42.32	0.06	1	AAAAAGTTTAT	1	305141
CTTATTAATATGTTATCAACTTTGACTGACCAAGAAGAAGAGAAAAGACCTGAGGGGGAAAATGTACGAAGTAAAGTGGAGCGTTTCTGATGCCCCAGATTATTATATCAATGCTATGCTTCAAAACATTGTCGGGCTTGAAATCAGTATTACCCATATTCAATCAAAGTTCAAATTCGACCAAAATAAATCACAGATTAATGTTGAAGGCATATGTTGAAAATTCAAAGAATTTGGTGGAGAAAGAGGCCAAGAAATGGCTCGCCTTGTAAAAGATAACTATCCAGGTAGCTTATAAGTTTTGTATTTTCTCTGCGCATTAAATATCAATAATTATTTATTCGTTTTCATTCTTTTCTTATCTTATCTTTTAATATTGACTTAACAGAGGGCAAGGCC…	ARS1107.5.8	11	306400	306800	42.32	0.06	1	TTATAAGTTTT	0	306565
GCCTCCACTACCGGCTCATTATTTGGAAACAACACAGCTTCTACGACAGTACCTTCCACGAATGGATTGTTTGGTAACAACGCTAACAATTCAACTAGCACTACGAATACGGGACTTTTCGGTGCAAAGCCTGATTCTCAGTCCAAACCTGCATTAGGGGGAGGGTTATTCGGCAATTCAAACTCGAATTCTTCCACAATCGGCCAAAACAAACCAGTTTTTGGAGGCACAACCCAAAATACAGGACTCTTTGGCGCCACCGGCACGAACTCTTCAGCAGTTGGTTCAACTGGTAAACTTTTTGGCCAGAATAATAATACGCTTAATGTTGGTACACAAAATGTACCACCTGTGAACAATACCACCCAAAACGCCCTTTTGGGTACAACGGCAGTTCCT…	ARS1107.5.11	11	311200	312000	42.32	0.06	2	GTAAACTTTTT	0	311537
GCAAATGTCAGGCTGCAGGAACCGGCTTTCTCCCACGAGGTTTCACTGCTGGCGGCGTACTGGTCATTTTTAGAACCTGAAAACCCGAGCTAGAACTAGGACTCTTGAGCAATAAGGTTTGCGCATTGCTATTCTCCGGATAAACCAAACCCACCCTTTTAAGAGCGTTTAACAAAGGTCTCTTATCTATCAAAAGTATTATGGCTATTTCTGGGATTCCGCTTGCGGGCCTTTCTACCCTCTTGATGCTACACATGTTTCCCTTAGATGCATGAGCATACCTGTAGGTACTTAAATTTTATTTTTATGCATCTTATTTCTGTCTAAATTTGTATATAACAAGCAACTGCAGTTCTGTGATGTGTTTTTCGCAACTGGTCAACAGGCTTAAGAATTTTT…	ARS1109.0	11	322400	322800	45.96	0.36	5	TAAATTTTATT	1	322627
AGGAAACCTGGACACATATGGATTTTGCGATGATGTTTGGACTTTTATCGTAAAAAATTGTCAGGTTACTGTTGAGGACAGCCACCGCGACGCCTCCCAGAACGGGTCTGGAGATAGCCAAAGTGTAATTTCGGTGGATAAGTTGAGGATTGTGGCATGTAACTCAAAAAAGAGCGAGTAATATCTATGCTATATGCCCGGATGCTTTGTTGACCAATAGTTACATTGAAATTTCTCTATTATCTCCTCTCTTCTACCGCTTTTAATACAAGCTCTAGGAACAGTGTCATGAAATAATGTTTTGTATTCTTTTATATTAGGGAACTTGTGATTCTTCTGTTTTTGTTTTTTATTTTTCCTGTCTGTACATTCATGTAATAATAATTTAGATTTAAAGTT…	ARS1109.2	11	330000	330400	45.96	0.36	2	AATAATGTTTT	0	330288
TGTTGTTGTTACTAGACGCGCCTGTACCCGTGACAGAAGGGTTTGTCTGTTTTTGAGTTAAATGACTTAAAAAGGAGTTGTAAAACTCGGAAAATTGTTGTTGATTGATCGTCGGATAGTTTTGGCCCGATCCGGTTTGTTGCATGTAACCGAAATCCTGAGGTAGCGCGTTAACATTAACATTGTTGTTTGAATTTGAGTTCGAATTAGCATACTGTTGTTGTTGTTGTTGCTGTTGTTGTTGTTGCGACTGCGAAGTAGGTTGCGTCAAAGATTGTGGAGGTAGTGGATAATAAACATTTTGCTGTTGTTGTTGAGGCGACTGCTGGAAGTGACCTTGATAAGGCGCTTGTTGTTGTTGCTGTTGTTGCTGCTGCTGCTGCTGTTGTTGTTGTTGAG…	ARS1112.0	11	380800	381200	46.24	0.11	1	ATAAACATTTT	0	381224
ACGAGTACCAACAATTTGCCTTTGTGTTTACCCTTGCTTTGACTTTTGTTAGCGCGTGGTACGTTTACGTTGGTCTTCGAAGGTGCTGTATTGTGGAAAGTTGGTTTTTTCGAAGAATAAAATCTCAGTATAAACCTGTAGCGTGGATTCATAATATAACTAAGCTAACATAAAAACGGGAGAGGGTGTGTGCGACTAAAGGCAAAGACAGGAATGCATCGCTTTAAAAGATCACCATAACTACTTAAAAGTTTCGTTAACGTGGTGAAAAAGAAAAGAAAAAGAAAAGTGAAAAAAATAAACCTAGGGTTGAAAATATAATCAGTTAGGTGTCATGATATTGATACATTTATTTCTATAGGTCTGAGAGTACTAACTTAGGGTATATGAGGGGTGTTA…	ARS1112.3	11	392800	393200	46.24	0.11	2	AAAAAATAAAC	1	393155
TGGCAACGGTGCCAATGGTCATGAGGATGATGATGAAGATGATGAAGAAATATCAACAAATTTTGCTCAAAGAAGTGGTAGGCTCATAGAATCTCACAATGGATTCCATTATTTTGTTGGATCTTCTTCAATGACATTATTTGGGTTAGAAATTCAATCTTTGGTTACAAAGTATATTTCGGTCAAGAATTTTCGACCTTTGCCAATAAACACCAAAAACAAGATTTTAAATTCAAACCTGAACCCGGCTATAAGTTCTTTTATCAATTCAAACAACTATCTTTTCTCGTCCTATAATTTTTTGAACCCTATATCGACTATTGTCAACTTAAACTCAATCAACGATAATTTATCTCCATTGATGTTTAAGATAATTTTGAAAAGCGATACGGATGGTAG…	ARS1113.0	11	408800	409200	52.1	0.04	2	TATAATTTTTT	0	409046
TGTTTGTCCATGAAGTAGCGGTGTGAGATTCGATAGTTTCTAGAATTTTCAGTATCAACTTGTCGTTACTGGAAATAGTACCGGAGTAAAAAGTCAATAATTTCTCTTGAACTATTGGCGTCGAATTTACGACCGGGTCGATGCTGAATAAAGAGAATAATATCATTGTGCTTAAGAACTTTCGATACGATGAATCTTCATCATTGTCTTTAATCATTATTGATGAGTAACTGTCATTGCTTAATAAAAGTTGAACCATTCTTTGCGATTGAATTGACTTTTTGCTCACACAAAAAATTAATACAATAACGTATTCAAGAACCTTAATTTGTTTGATCCACTCACTGCCTAGAATAGCCTCTAATTGAGAATTAATGATTTTGACATTCAACTTATTTG…	ARS1113.2	11	412800	414000	52.1	0.04	4	AAAAATTAATA	1	412862
ATGGTCGATGATGACCCCTTATGGAAGAAAGAAATGTTTGAGAAATATCTTTCCAATAGATCAGCCGATCAACTTCTTAAGGAACACAATGAAACAAGCAAATTCAAAGAAGCCTTTCAGAAAATGTTGCAAAACAATTCTCATATAAAATATTACACCCGTTGGCCTACCGCAAAGAGACTAATTGCCGACGAACCAATATACAAACACTCCGTGGTCAATGAAAAGACAAAGAGACAGACCTTTCAAGATTATATAGATACCCTCATCGACACTCAGAAAGAATCAAAAAAAAAATTGAAAACACAGGCCCTAAAAGAACTAAGAGAGTATTTAAACGGTATTATAACAACATCATCCTCTGAAACTTTCATAACCTGGCAGCAGCTTTTAAATCAC…	ARS1113.4	11	418400	418800	52.1	0.04	1	AAAAATTGAAA	1	418750
AGTAAGAGATATATGGCGAACCGGCACTTCAAAGTCTTAACCCACGAAGATGTTTTAAACGAGTATCTGAAAATAGTAAATACGATTGAAAACGATCTTCAAAACAAACTAAATGAGCTCCGACTGCGCAATTATACCAGAGACCGTATTGCTAGAGATAACTTTAAAAGCTTATTAAGAGAAGTGCCAATCAAAATCAAAGCAAATACTAGATGGTCAGATATTTATCCTCATATAAAGTCTGATCCGCGCTTTTTACATATGCTTGGAAGGAATGGCTCGTCCTGCCTTGATTTATTTTTAGATTTTGTTGATGAACAAAGGATGTACATCTTTGCACAAAGATCAATAGCCCAACAGACGTTGATAGATCAAAATTTTGAATGGAATGATGCCGAT…	ARS1113.5	11	419200	419600	52.1	0.04	1	ATTTATTTTTA	0	419164
AGGTTCACACCCTTGTTTTTAATATAAGCTAGAGATAGAGTTCTGAAAATGTGTATTGAAATTTTCTTTGGTTTTACTGAATCAGGAATTTCCATATCAGTAAATTCGTAATCATATTCTTCATCACCCTCATCACATTCCTCAATACTGCTATGCAAATCCCCTTCTTCGTCAGAAAGTGAAATATTTTCATTCCCGTCTTCCTTTAAATCAATGTTATTGAAATCCACAGACAAATCCTTAACCAAATCAAAAATGCCCTCTCTTTTGATGGAAGGAAAGAACAGTTCGGAAAACTTTTTACAAATTAAGTCAAGCAACGAGAGACCACCAACCAACAGTGTACCAGCTTCTGATGAGTAAGTACCATTAGCGTTAGACGCTGTTTCTTTTTGGGCC…	ARS1113.6	11	423600	424000	52.1	0.04	2	AAAACTTTTTA	1	423725
TCCTTTCGAATTATGCGTATTCAGTTGAAGCGTATTTGTGACCAGTGTACTTCAAGGCTGATTGTTTCACCCTTGGACACAGAACGTTAAACAATGAGTTTGTTTGAGTGGGTATTTGGAAAGAATGTCACTCCGCAAGAGAGGTTAAAAAAAGTATGTTGTTCTGTATTTGGATCAGTTATTTTAGTGAACATACTAACGTTAATTATTTGAGTTTTTAGAATCAAAGGGCTTTAGAAAGGACTCAGAGGGAGCTTGAAAGAGAAAAGAGAAAATTGGAACTACAAGATAAAAAACTTGTATCAGAAATTAAAAAATCGGCAAAGAATGGGCAAGTTGCAGCTGCGAAAGTTCAAGCAAAAGATTTAGTAAGAACCCGGAATTACATCCAAAAATTTG…	ARS1113.5.0	11	437600	438000	40.22	0.07	1	AAAACTTGTAT	1	437618
CTCACAAAGGCGCTTGCTCTAAACATGCATAGGGAAATTTGAAAATGATTGTTATGAGTAAACCTGTTAATGCTCCTTTAAACGTAATCTTATTTCACCAATTTTAAAAAAAGAAATTGGTAATTAACCTCACCTAACTTCTGTAATCACTTGTCAACGCTATTTACAATTTTGCTTTGATTTATACAGAGGAAGCAGTTTACTCTCCTTTCTATGTGTATTTGATTATTTTAATTACCAAGAAAACAAATTCTCGTAACATTCTTATTTTATACGTTCGGAAATCATGAACATTTATTTTTATGATTATGTAATTAAAAAAATATAATAAATTTATTTTGAAAATTAATTTTTTTAAAATTTTAAATATGTTTTTATCATGTGACTTATGAAAATGAT…	ARS1113.5.1	11	439600	440000	40.22	0.07	14	ATTTATTTTTA	0	439794
TTTGGGGAAGAAATCAATCCATTAGAACATTGGTTTTGGAAACTAGGCCAGTCCAAGCGCACAAGTGGTTTACCCTCGAGCATTTTTCGACTATTAGAGGATTCAAGTATCTATCGAATTCTCTGAAGCTATCATACTATCCTCTGGACGATATTAGAACGATTTTTCAAGTGAAACGTTTTAGCAAAAGTTTAAAGACACTAAACTAGCTAAATAATTTCACTGTGAGCAAGTCTTTAAACGGTCTTTTTTGAATCAAAAGAGGCCTAGAATTAGCAAAATATTTAACGCATAAACTTTTTTTAGACAAATAATGAGCTCTCAAAAGGTTTTTGGTATTACTGGACCTGTTTCCACCGTGGGCGCCACAGCAGCAGAAAATAAATTAAATGATAGTTT…	ARS1113.5.3	11	442800	443200	40.22	0.07	4	TAAACTTTTTT	1	442852
ATGGCGTAGAATTTCATCCAAAGTTGTTTAGAAGATCAAAGCCTGGCGAAGATCTTGACTATTGTATTTATAAAAATATCCCTGTCGACGAGGACCCTGAGAAGCAAATACGAAGCATATTGCAAATAGCACCTATTTTACCTGGTCAACAATTTACCGACAAATTTTTCATCCCCGCATTTGAGAAAATAAAATCACAAAAGAAGATGATTGAAAACGAAAAGCAGAACCCAGCAAAACAATAGTGTATATGTTGGATATGATATTTGTTGTAAATTATAGATTAGTTTTTTTATATGTTTTTCTTTTTTTTGTTCTAACTATCTGATTGTTCTTTCTTATTTTTATCCAAAAACTTATTTAAGAAAAGCTTTTTATAGCCAAAATGTGCAAAATTCA…	ARS1113.5.4	11	445200	446400	40.22	0.07	2	TTATATGTTTT	0	446416
TATGATCTCTAAAAGATACCCGCGACCGGTAAGAAAACCCCAACATCATCAATGTAGTAATTGATACTGTGATGGCAGTGAATATGAAAATCCTTTTGTCTAATTGAGATGCCGCCGATATGAATTCACCAGAATCTAGTTCTGGTAAGTGCGGCACTTGCGAAAAGGTTGTAGAGAACAGTGTGGCCTGCTCATTAGCAGCGCCTGGATCAGAAATCTTATCTCTTCTTACTACTGTTGGTGTACCTCCTTCATCTGGTGAAGCGAGCTCACCATTAGCGCTAAAGAGACCAAAATTTATTCCCGCTTTTTTATTCAATCCATCCGGATTAAGTACTGCTACTAACGACTTCGTTGCGATAGCATTTGTTGTCGTAGTAGTCGTGATACTCAAAAACG…	ARS1114.0	11	448400	448800	39.16	0.2	3	AAAATTTATTC	1	448597
AACTGGAGAGGAAGGGGGAAATCAGTTGTGAATTGTAACCTGGACATAAGTTAGGATCTGCCACAGTTTTGCTTTGAACCGCTGCGAGAACGCTCCCACCACCACCGGCAAAGAGAACCAGCAGAGCGCTTAGACATTCCAACATTATCAGTATATCTCGTGTGTTCCTGCCTCTTGATGATTTTAGCTAGCTGTAATGTGTAACGAATTATTCCCTTACTGCTTCTTGAGTTAGCCGCCAAAGAGGAAATATAGCCACAAAAAGAACTTACAGAAAAGATAAGGTAAAAAAAAAAAGTGATCTATAATGGGAAAGAAAAATCCAAACTTCTTCAAAGAGTATATATATGTACAGGATATTAAAATGTAATGATAGTAGTAATAATAGTATTAACATAA…	ARS1114.1	11	449600	450000	39.16	0.2	1	AAAAAGTGATC	1	449956
AAATGCGGTTGAAGGAACACGAACACGAACAGAAACTGCTGGCCAGGGAACAAGAGTTAAGAGACATTGTTGCAAACACCAACGATAAACTAATAGACATATCGATGATAAACAATAGTGGCATTGTAATTCAAGGGACAGACCTGCAAGAAGCTCTTGATAAAAGACAACAGGAAGAAGGTGGAGATTCCCGGGAAGACGAAAGGAGTGCAGGTGATGACAACCTCAGTGGGCACTCAGTGCCTTCAAGCGGATCCGCACAGGCAACTACTCACCAAACTGCACCAAGGACTAATACGTTTACTCTGCTTACATCACCGGATTCAGCGAAAATATCAAAGGAACAGTTAAAGAAGTTGCACTCTAATATACTAAATGAAATTTTCAGCCAGTCCCAGG…	ARS1114.2	11	450800	452000	39.16	0.2	3	TAATACGTTTA	0	451488
ATATTATAAGAAATGTGGCAAAAGATTGGCGTATTTATTGAATGCTTGTATAATTGGGTAGCTAACCAAAAATGACTTGTTTTCCTTCTTCAGCGAAACTAATAAATAAACAAACAAACAAATTAGGACCATCTTGCATTTGAGATCTGAAGAATATGAAAAAAATTATATAACAGTATCGTATAATGCGACTTTTTTTCGTGATGCCTATGTAACAATAGTAGAGAAAAAACAGGTCACATTTCTATAAATGATTGAATAATTGGTTCTATATACGTACATACTTTTGGAGTTTTACTTTTATTCTCTTGATTTAATGGATGTAGATGCTATAAAAAGACATGTTTTCCCGGAAATAGTTAAAATGATATTTTGCCATTTTTATGCGGATGATGGCTA…	ARS1114.5.2	11	461200	461200	47.98	0.11	1	TTTTACTTTTA	0	461209
TTTTGCCGCTTTTGGGCAAGTAGGTCTTTCTGCACGGCCCGGCCCGGGTCGTGCGGAAAAAGAAAAAAGCAGACAAAACAAAATTTTTCCTTTTTTTCGCCTTTGTTTCTCCTGATTCGGGTATATAAGTGAATACCATCTAATGTGTTTCCTTCTCGAGACCTCGGCGTCTCCCAGATCAAAGCTCAGCAAAGATTTTAAACCGCAATTTACGCTCCTTTCATCGGTAACTAAGAAGAAAAAAAAAAAAGTACGACCACACAATTTCCAGTGTATTCATTCCTTAAACTTCGTTTATTTTTTATTCATTCATTCATTTTTATTTGAATATAACCAACTACTAGTCCTTCCTTTAAACAAAAATTTACCCTCCCTTAATTTTTCAAGAAATTCCAGTAT…	ARS1116.1	11	518800	519200	40.77	0.38	2	GTTTATTTTTT	0	519062
TGCTCCTGTGCCTGGGCCCTAACTGGGTTGCCGTTTTTCAAATAGCTCGGATTCAGAACCGATGCTGGGGTATTGTGAGGCGTAGGGGCGTTGTCGATTTGCATCGACGACTTGGGTTTCGTTCTGATAGGGTCTGACATGATCTTGCGCTTTGCTCTTGGTCCCACTGGGCTCACTAAATCCTCCTAATCTACCATCAAACTGCCATTTTTGATCCCAAACGCTGCTATTTAAAAGGAAAAATTTTCCCAATTACGCGGGTAATACAAAAAAGATATAGCCCATTGTTATAAAAATATGTATGTGTTCAATATAGTGGTATATAGGTGTTATTTGCGCTGAATGATGTACTTGTCAATGTCTGCGGGCTCATTTCCCACCAACTTGTTTTCCCAGTCG…	ARS1117.0	11	524400	526400	46.48	0.12	1	AAAATATGTAT	1	526433
CGAAGAATAGGATGAGATGTGAATTTTCGTTTCTAATCCCCTCGGCCGTGCGGCTGAAAAAGAGAAATGATATTGGAATAACTAGGTTTCAGATGATGAGAAAAGAGGCTATTTTGTACTATTCACCGACGATAAGAGGCTGTAAGAACCACTCATGCCAACAGCTAAGAGGACGTCATCCAGGGCTTCGTTGGCACTGCCCTTCCAGTTACGGTTGGTGCACAAGAAATCATGGGGCCATCGGCTAAGAGACTTCATTTCCGGGTTCTTAAAATCATGCAGACCCATTGCTAAATACGTTTTCCCCAACTTCATCGTGGTGCACTATATCTACCTGATCACGCTGTCGATTATCGGGTCCATTCTGTTATATCCGTGCAAGAACACGGCGTTCATCGA…	ARS1117.1	11	527600	528000	46.48	0.12	1	AAATACGTTTT	0	527593
TAAAAATGAGCACCAATTCGAGTCACTGATGCCTACTGCTCAATCCAACCATCTAGTTCTGCAAAGATACTTACTCCGCATAATTAAAAAAATAAGGTATTTTAAAGTTGTGTAGTGACGAATGTAGTGACGCGGAAACGTTTTACTCGTCAATGGACATTTGCGAATGTGTCCGATAAATAGTTGAGGCTTTTCCTGCATTCTGTCAAGAAGGGTATGTGTATGAACATGCAAATGACACTGTAAAATGATTCATTACCCTGATTATGGAGTGATTTTCTTTCCTTTTTTTTTTTACATTTAGTTTCATTATTATGCAAATTAGAGGGTATACAGTTGAGATTTTAACACTTTGAATTAAAAAGTGTTACAGAGGAAACCGACGCAAAAGGCTTGGTG…	ARS1118.1	11	581200	581600	48.73	0.04	2	TTTTACATTTA	0	581539
TACTTACTCCGCATAATTAAAAAAATAAGGTATTTTAAAGTTGTGTAGTGACGAATGTAGTGACGCGGAAACGTTTTACTCGTCAATGGACATTTGCGAATGTGTCCGATAAATAGTTGAGGCTTTTCCTGCATTCTGTCAAGAAGGGTATGTGTATGAACATGCAAATGACACTGTAAAATGATTCATTACCCTGATTATGGAGTGATTTTCTTTCCTTTTTTTTTTTACATTTAGTTTCATTATTATGCAAATTAGAGGGTATACAGTTGAGATTTTAACACTTTGAATTAAAAAGTGTTACAGAGGAAACCGACGCAAAAGGCTTGGTGACGCAAACTTTTCCATCTTTATTTCACCTCTTCAGACGGTCCTAAGACCTTTTGAACGTATCAATAT…	ARS1118.2	11	581600	582800	48.73	0.04	2	AAAAAGTGTTA	1	581606
CCTTTGATATAAGAAATCGCCTTATCCAGAGCAAATTCCTGGCCACAGTGATTTTGAATAATGGAAACCTTGGGCCACGTAGCTTTTGCACCATTGGTGATTTCCCTTAATAAAAATTCTTTTGTTGGGTTTGACAACAGCTCCTTTATTCTAAAAAGCATACACATGTCGGGCAAAATAGTGATGTCACCAGAATATTGTTGAGATAATACCGATCTCAGTTTTGTAAGCGCGTTTTTGGCAATTCCCATCTCACTTCCAATTTCTAGAATATGAATAGCTTCATTGGCCATAAAATTGTATATACTTGATAAGTTTTGCTTTAATCTTGCACTAAATTCGTCCTCAATTTCCCCGCCAACACAGGATAGTGATAGTTTCAAAAAGGGAAATACGTGA…	ARS1120.0	11	606000	606400	51.41	0.07	1	TAAAATTGTAT	1	606406
AGGCCCGCCCTACTGACATCCTGTTCAGGATCCTCGAAGAACAGGAAAAAGGACAACCGTCCTTTTCACTTCACGTTCGCAGGGCTTTCCTCGATATAATGGCGATTACACAAGCGGTGGCGTCTTGAAAAAAGTTGGGTTTCTTATCTGTACGGCGATCACTCCCCTCATATGATAGCTGTGTAGAGTGACTTGCTCTTTGATTGGCCTTACTTCTTGCATCTATCATCCTTTCTTTTACTCTCTCCAATCACCACAACTCATATCATTCTACATTTCATTTTATTGTTCTGTACAATTTTTAGGTTTGTAAAATATATAAGTGATGTACATATCTTCTATATCCTTTCCGTTTGTGTCTATTTTAGGGTTGGCTTATTACGCATTATTCCTACTTTA…	ARS1120.2	11	614800	615200	51.41	0.07	2	GTACAATTTTT	0	615140
CTACACAAATAGTCAGTAACGCCACGTTTTAGGATAATGTCGGATCATGATACTCCAATGGAAAGCATACAAAATGGTGAAAATTCAGACGAAAGATTGAACGCCATTGCGTCTTTTTTCGGTTGCTCTTTAGAGCAGGTTAAATCATTTGACGGTGATGTGGTAAAACACCTTAACGATAAACTTTTACAGTTTAATGAACTTAAATCGGAGAATCTAAAGGTTACCGTCTCATTCGATGAATTGAAGGCTAGTTCTTTAAAGAAAATTGATGGTTTGAAGACAGAAATGGAAAACGTTATAAGAGAAAATGATAAAATCCGAAAAGAGAGGAATGATACTTTTGTTAAGTTCGAATCTGTAGAAAATGAAAAGATGAAATTATCAAGTGAGCTAGAG…	ARS1120.3	11	619600	620000	51.41	0.07	3	AAAACGTTATA	1	619701
TTATCTGTTATTGCAGACCTGCTATCCTTTACCGAGTGGTCAGCATCCATTCCTTCGTTATCTTTATCAAAAGTGTTTGGTAACTGTGATTGAGCCGCACTTTTGGGTGTTGCAAACACATCCTCTAGGGCATCGCGCTTATTTACCGATGTTATAGAGGAATTCCTTGTATGGAAGGACGCGTTTGAAATGTTACCATTTAAAAACGAGGATGAAGCTCTCCTTGGGTAATACGAACCAAAGTCCTGATTCTGCAAATTTCTTATCAGATTTTCATTACTAGATTGGCGAGTATTATGTTTAAGTTCTATCATCGAAGCTTTGTTTTGGTCATTGCTAGTATTAGTATCACTGGAAGGATCTGCGAAAAAGTTTGGTCCTTCATCAGAAATAACAGGG…	ARS1123.0	11	638800	639200	58.83	0.02	2	TATTATGTTTA	0	638971
CACTCGAACTTATTAAGGAAGACCTTTTGATTACTCTGATAAAACAAATGGAAAATATGTGGGCAGCTGAAAAAAAGTTTAGTACAGAGGAGGAGTATGTTTCGCCGAGGTTTTTAGTAGCAGATGGATTTCTAATCGACCTAGCAGAGGAAAAACCGATTAACCCAAAGGATCCGCGCTTACTGACACTGCTAAAAGATCATCAGCGTGCCATGATTGACCAAATGAATTTAGTTAAGTGGAATGACTTCAAAAAATATCAAGATCCTATCCCGCTGAAAGCCAAAACCTTATTTAAATTTTGTAAACAAATAAAGAAAAAATTCCTACGAGGTGCGGACTTCAAGTTACATACATTACCTACAGAAGCAAATTTAAAGTATGAGCCGGAGCGGATGA…	ARS1123.2	11	641600	642800	58.83	0.02	5	ATTTAAATTTT	0	641765
CCGTGTTGATTAGTGTATCTCAACAGCCTCGTGGCACACCAGCAAGTAGTATGATAGGATCTAGTACAGCCTCTTTAGAGATGTCAAGCTACCTCGGCATTGCAAATCATCTACTAACCAATAGTGGTATTAGTATTTTCATTGCCTCCCTATTACTGGCAATCGTTTAATAGGTGCAGAAATATCCTTTGGATTGATACTTCTGCGTCTACGATTCGTCCTAGTGCCATATTATGTACCTATTTATTTACTATTCATTTCTTTGTTCTTCTACTTCAAATAGCTCAGAATGTATTATTTTTTTATTAAAATCATTTCTATATATAGGATTAACGAGAAACCATTCCGGGAGTGGCATCTCTATGTTTTCTCTATGTAAGCCACACCAGAGAACGTTGC…	ARS1123.6	11	649200	649600	58.83	0.02	1	TATTATTTTTT	0	649624
AACAATTCTTGAAGAAGAAGATTCCATTGAAACTGCTTCGCTAGGTGCGACGACGACTGATTCTATTGGGTTATCCGACACATCATCAGAAGATTCGCATTATGGTAATGCTAAGAAGGTAACATGAGAAAACAGACAAGAAAAAGAAACAAATAATATAGACTGATAGAAAAAAATACTGCTTACTACCGCCGGTATAATATATATATATATATATATTTACATAGATGATTGCATAGTGTTTTAAAAAGCTTTCCTAGGTTAAGCTATGAATCTTCATAACCTAACCAACTAAATATGAAAATACTGACCCATCGTCTTAAGTAAGTTGACATGAACTCAGCCTGGTCACCTACTATACATGATGTATCGCATGGATGGAAAGAATACCAAACGCTA…	ARS1203.0	12	52000	52400	49.35	0.02	2	TAAATATGAAA	1	52110
CTATTTGTCGTGTATAAGTGTGGAACTTGTAAAAAAGCAGTTGTGATAACTGTACTGTAAATTTTGAAGTTATCCATGCCTCAACCGTGTGTTTACTGCTGTTTTTCTTTTTAAACAATTGTGTAGACTTAACCTCTGCGGGCTTGAATAGTGCTTCAAAAGGTTCAGGTAGTCAAGAGGTTAGCTATATAAACAAAGATGACTTTTCATCCTTTATTTCTTTTATTTTGTTTTTGTTTTTTGCCTTTGTGGAAAAAAAACAATCTACAAGCGAAAAGAAAAATTTTGGAGAAAAATATAATTTAGGATTACAAGAAAGTGATAGAAAAATGTACAATCTTAAAAGAATAAAGCTGCAGAAAAGAGATGCTTTTGCTTTCAAATTTTTGCAATATCAAG…	ARS1205.1	12	76800	77200	36.21	0.07	2	AAAATATAATT	1	76960
GCAGTCGCTAACAGGGTACCCCAGAATTGGTCTACAAAACTTGGTTGTTGATAAACGTAAAAAATTCCATGGAAACATAGGTTTGTAACTAAGACCATTATGATAATTCCCGGAACGAATTCTGGAACCATTTGATTCACAACAATAGAAGGAATTAATTTTGTAATGGATATCAACAGGACCAGTGAAGTGGCCAGTAGCGTTATACCGGTGGCAATGGAATAATAATCGAATTTGGCCCATAGTTCTTCGCAGGTCTGCAAGAAGACCTTTTGGTATTTATGACCCAGCTTAACAAATTTTTCTGGATCGCTTGTTGGGGGGGTGTTAGATATATTTTTCGCTAACGGTTCCAATATTTCGTCATTGCCATGGTGGATCTGCATCGTGTCCTTATAT…	ARS1205.2	12	78800	79200	36.21	0.07	1	TAACAAATTTT	0	78927
CATTATTCGCCGCCCGTAGAGAACTCTTCGATGATTGATCCTACCAAGATATATCTTTGCGACTCCGGTTCGCAATTCTTGGAGGGTACAACTGATATAACAAGAACAATTCACTTAACAAAGCCAACCAAAGAAGAAATGGATAATTACACACTGGTACTTAAAGGTGGCTTAGCCCTAGAGAGGTTGATTTTTCCCGAAAACACTCCCGGGTTTAATATCGACGCCATCGCTAGGCAGTTTTTATGGTCCCGCGGGTTAGATTACAAACATGGCACAGGCCATGGTATCGGATCATTTTTAAACGTTCACGAAGGACCCATGGGTGTCGGCTTTAGGCCACATCTGATGAATTTCCCCTTAAGAGCGGGTAACATAATAAGTAACGAACCAGGTTAT…	ARS1205.4	12	83200	83600	36.21	0.07	1	GATCATTTTTA	0	83340
ACAACGGATTATAGGTTCCGCCAGACCCCGTTGCTTTGGTTCCATGGAGCAGGAGCAGGATTTTCCGTGGAAAGAGAAGCACCGAGCGAAAAGCGGATACGGAAGGCGGATGCGGAAACGGATGCGGACGCGGAAGGAAGGAAGGAAGCAAACCCTTCCGTCTATGTCGCTATGAAGCCGTCTCACAGTAGAGCCATTCGAGATTTCCGTCCGTCGGTACACAGAAATCTTCGTATCGGGAGTTTTACTTTAAAAGGAAACGATCGTAGGAATTCCCTAAAGAAAAAGGAAGAAAAATTTAACGTTGAACATTGTCATTTTCTTTTTTTTTTTTATGTGTGCAGAATATACTATCAAGTAATGTGTTCTATATATAAAGGGTACCTCATTTGATCTTGA…	ARS1205.5	12	84400	84800	36.21	0.07	1	AAAAATTTAAC	1	84487
AACTTACCCAGTTGAAATTGCTGAAGCTGTTTTCAACTACGGTGATTTCACCACTATGTTGACCGGTATCCCCGCTGACCAAGTCACTAGAGTCATCACTGGTGTCCCATGGTACTCTACCAGATTGAGACCAGCCATCTCCAGCGCTCTATCTGCAGACGGTATCTACACTGCTGTACCAAACTAGGATTTGACGCCCTTACGAATAGAACTTTACGAGTATTAGAATGTTATGAATAAATGAAATTGGTTTCGACGGTATAGATGAATAAAGGTATTTTGAAAATTATAAAAAAAAGTTTTAATAATATAGATTTGGTAAAATAAATAGGCGTATATACACATTGTATACTGTTGATATTATCAAGTTTTTATTATTAAAGAGCTCTTTTTATTTTT…	ARS1206.5.0	12	94800	95200	42.37	0.26	2	AAAAAAGTTTT	0	95224
ATTTTGCTAATGATTCTATCCAAAATCTCAAAAACAACTCGAGTGTTTTGTAAAAACATGTTTGTCGATTGAGAACAGCGGTAGCAATTTGTAATTTTAAATCACGCTCTGAGTCTGAGTATTGGTTCTCTTTTTTCCCACTTAGATTGAAAAGTCTTCTAAATTGGTCTGAAAGTTTAAATATTGCTTCATAAAGAGGGAAATCGTTCTCGCCAAACAACAATTGTTCAGTGTAAAGTCTCTTGAAAGACCCATTAGGACTGTTTAAGAATGTGAATGTATCATACGCATTTAATAAATTTATACTGGGAAGATCGCCCATTTCCATTTCTAACCCTTTTTGGAATACGGAGTTATCTTTGATGGCTGTAAGAAGATCAGCTTTAAGCGAACAGGAAT…	ARS1208.5	12	135200	135600	27.82	0.02	5	TAATAAATTTA	0	135496
ATTTTCAGAACGACATTGGCCTGATATATAGTCTTGAATCTTGATCTTAAAATAATAAAGAGTGACAGCTGAAATAAAAAGTACAAAAAAGAAAACAATATACCAGATATGAACCCTTTTAGTGAGATTCCAGCATGTCTTTGCGCAGATCCAAATCTTTCTTTGTCTTGAAATTTATTCAGTAAATTAAAAGTCAGTTCTTTAGTAGCATTCATCTTCTTGGTAAGTCTTTTTCTTGTTTTTGAAAAAGAGTTCCTGAAGTTTGTCTACTGTGAATATACTTTGCACATTTGTTTAATTTTTAAACACGCTATAATTTGTGTCATAAAGAATTTTTTGTAGAATAGCTTTTTTTTTAATAGGAAAAAAAAATAAAAAAAGGTGGAAAAGACAATCTTT…	ARS1208.7	12	140400	140800	27.82	0.02	3	GTTTAATTTTT	0	140621
AGGGCAAATAACGGATTCCACCGAATCACTAATTCATGGAGGCGCAGAAAGGTATATTGTTAACGCTTTAAAGCCTATAGAATTAAATAAAACTGAAGGCTTTTTCGAAGACCCGCCGTTCCATCTTCCTTCTCCACCGGTTGATTCGACAAATCTGGAGTATGAAGACGTTACCGATCTTCCTAAGAATGGTTTACGATATGATTTGAATGATATATCCGTTGAGGTAATCGAAGATTTATACCGCCAGATTGAAGCTTTTTTGGTTCATTTCAAACTATCCAGAAGTTTTTTACAAATTTTCAAAAACTATGTCAATATTCTTATTCAAGAAGGCATCAATCCTTTACGCGATGAGTACTTCACAATATTGGAAGATGAACTGAAAGGTTTTTTCAC…	ARS1208.8	12	143200	143600	27.82	0.02	1	TTACAAATTTT	0	143597
CCGGTTGATTCGACAAATCTGGAGTATGAAGACGTTACCGATCTTCCTAAGAATGGTTTACGATATGATTTGAATGATATATCCGTTGAGGTAATCGAAGATTTATACCGCCAGATTGAAGCTTTTTTGGTTCATTTCAAACTATCCAGAAGTTTTTTACAAATTTTCAAAAACTATGTCAATATTCTTATTCAAGAAGGCATCAATCCTTTACGCGATGAGTACTTCACAATATTGGAAGATGAACTGAAAGGTTTTTTCACTTTCAATTCTGTTATAGAAGAGATTTTAGAAATATTTTTAATCCACCCTCGCAACAAATTCATTGCATTGTCCCTTGCAGAATATACCTACGCTAAGAACAAAATCAGAAGACATTTTAATCACTGGAAGACTGTA…	ARS1208.9	12	143600	144400	27.82	0.02	4	AAATATTTTTA	0	143733
TGCCACTCCATCTTTATTTCCATCTAGTGCCGATGTTATTGTACCGAAGTCAAGGAAGCAGTTTAGGGCAATCAAGAAGTACATTACTGGAGAGGAATACGATACAGAGGAAGGCGCAATAGAAGCTTTCACCAATATTCGTGATTTTCTATTGCTCAGAATGGCAACAAATCTTCAATCTTTAACAGGGAAGAGGGAGCATCGGGAGAGAAATCAGCCGGTTCCTGCAAGCAACATCAACACGTTGGCGATAACAATGCTAAAACCGCGTAAAAAAGCTAAAGCCTTGCCTAAAACTTGATACATATTGATATTTATTATTTAGTACACGTATGTAGCATCGATCTTAGAAAATGCATGTTTGTATTTATTGTTAGTACCTTGATCGCCACCTTTCTA…	ARS1208.11	12	147200	147600	27.82	0.02	1	AAAACTTGATA	1	147590
TATGTGTGAAATCACTCGGAGTTTATAAAAAGGCTGCAACCCTTATTAGTAATATTCTGTAATTGCATAATTCATCTCATTTTTGATCTTACTTCAACATTGCGGGCGTGATTATAGGTCAGTGTTTATTCCTTTACTCAGTTGATGATTTCAAATGTGCTCTCCTCTCCATTCTTTTTCTTGTTAATAAAAATCCATAACTAAATAAATAACAAATATTAGCAATCGCAAAAGTATTAACTAAGCTAGAGAACCTTCACTAGAGAAGCTCTACCTAAAGGTATAGAACAGGAAAAAGTGTTTTTATTTTGGCGGACTTCGTGGAAGATTGCCTTCCATCAATAATAAGCGTAGTCCATAGGTACGATCATTTCCTTTTTAACCGTTAAGCAAGCGACA…	ARS1208.13	12	150400	150400	27.82	0.02	1	AAAAAGTGTTT	1	150391
TAAGCGACGGACGAACAGATAAATTGTTGAATAGCTATTTCACTGCTGATATTTCTCTTACTTGGGCTCCCCTATCCCATACTCTTCACCACTACAAATATGCAGTTGCCCTTTCTTCAACAATGCTTTTTTTATAGATCTCGTATACGGATCCGCGCCTTTGTACTACCTATATCTTATTATGATATATACAGGAGCACAGGAATGTTCGGTACAGGGATGATACCTTTAAAGGAAGTTTTGGCATGCCTTGACAACTTCAATTAATCTTTGGCCAAGAAAATGAACCAGAAATCAAATTTTATTCTGTGCCCTCTGAACGAGGGCAATATCCAATGTTTGACACTAAACGGTTGTCAGGAGAAAAATTGAATGTTTCCCAAATCAGAAACATTAAAA…	ARS1210.0	12	223200	223600	36.88	0.1	2	AATCAAATTTT	0	223475
TGGGGCGCTTGTGAAGGATGTGTGCCGATCTCAGGCTGTTGATGAAGGTCTCTTCAAATACTATATTATTATCTTTTAGTAGGTCCCAGGAAGTGCCTTATTCTCAACATGTTCAGCGTTTATCTTTCTCAGCCTGAATGTATTTCAAACGATGACTAGAAGAGATTAGTACCCCTTATATAATCCTCGAAAATGTTGCTATCTCAGTGAATTGAAAGTTCATGCTGACGTCTTTATCAGCGTTATCCATTGCCTTGTTCTTTTCAGTGCAGTGGCAGATGTTACGAGGGTCAAATAATTTTTGAATATATATAGAAATGGCTACTTACTATAATTAAAAATAAATATGAAAAATAAAACTTCAGTACCCCACATCATTCTCATTTTTTTCTGTTTGTT…	ARS1210.1	12	224400	224800	36.88	0.1	4	AAATAATTTTT	0	224612
GGAGGCTTTGTTTAGCAAAGAGGTATACCATGGAAAGGCCGTAATGAATGTTTGGAATTGAGTGAACGGAAAACTCTGAGCAATATCAGATTGTAAATCTGCTGTTGAGGCCAAATCAACCATGTGATAGTAGTAGTCAGCAACAGGTTGAGGTAGGGTTAAATGGTTTTGCATCATGTATGAGGTATACTGTGGAAAAGCGGTGTCGAAATCGTTTAAAAACTCCATGAAGAATGCCATGTCTGCATCTGCAGCTGCGGACCTGGCAAGTGTATCGTCATTGGAACTAGACGTTAAAGTTTTGGCAGCAAAACTGTGGCTGATTAGAAAGCTTACCAGGAGAATATTTTTAATGAGGGAGAAAGAAGGAGCAAATATCATTGATACGCAATATTTTCA…	ARS1211.0	12	229200	229600	33.59	0.12	2	GTTAAAGTTTT	0	229493
TGACCCCTCATACATGCTTGTTCAAACACAAAAGATTGAGGTTGAAAACTTGGCAAGAATTGGGCTAGGAGAAAGTGGCCAGGTGCTTCTTGTTCAGAACCAAGCAGATATGCTAGCACAATGTGCACCGTTCTATTTTTTTCTATAGTGTGTTTACATTTCTTGGCACATTGCGTTCGGTTTCAAATTTGTATAATTATTATTGGAGCGAGACAGGCGTTTCTGTACCGCTGTTATTTTTAACATCCACTGCGTTTTATGTATCTCTAAAATTGTGCGTTGCCTTTCTTTTGTTTATATTTTTGTTCAAAAAATGAGTTAATAATGATTTTTCATCTTCGGCTTACCGGTCTTGAAAATATTTGTTAAGACAACAGTGGATAAAATAAAACTAAACAA…	ARS1211.1	12	231200	231200	33.59	0.12	1	GTTTATATTTT	0	231251
ATGTAAACCCATGCATTCATGACAATTTTACCTATTTCTTAAAGGCCTTTGTCACTTCTTTATGGGAATGGCGCTACTTTAATTTTCCGCCTACTTTGAAAAATTTACCAAGGCGAAATTGAGTGCGCTAGGCGGAAGTTCCAGGGCACGGTCACCGAACCTTTGTGCTGTTTCGAACGAGGGTCCCGCTGGAGGTTGACGGACGCGGGAGGAGCTGGAAAGATGGAATGGAAGGACTGCAACACTCAGTAAGAAGGTTCGTGGTAGGGAACATCACCTTCTCTAGTTCCTGTAAAAATAATATGATCAAGTTTGAATCCTCGTATTGAAAAATCGCGAGTTATTAAGTGTGTAATTTAGAATACCGAAATAGCACAAGAAGAGATAAGATAAGATACT…	ARS1211.5.0	12	242000	242400	38.13	0.23	1	TAAAAATAATA	1	242115
CATGACCTACCGGGGCCAGATAAAGATGCGGAAGGAAGAGAAAAAATGTATAGTGGTTGGTGAACCGCAACAATAATTCGTGCCAACACTTTAATCGAAGCAAAAATTGTCTTGTATGTTATTAATATTATCTATCTAACCATTGATTTACGTATAAAACTGTCGATGCTCATCGCCTAGCAATGAAAAAATTTTTTCTTTTTTTTTTCATTATTTCTCTTTGTTGCGTACTTTTTTTCATTGCGTTTCGCGGCAAAAGCGATTCGAGTTGACTGGAAGTGTGTTATACTATAAAAAGTGTATATGCCTATTTTTGGTTCTGATCTTTACTTTACTGTTAAGTACTGGCTGAGGCAGTAGACTCTGCCTCTGTTACGGCAGCGGTATTCGCCTCGGCAT…	ARS1212.0	12	282000	282400	49.44	0.04	1	AAAAAGTGTAT	1	281910
AGATTAGTTAAGCCCTTCCCATCTCAAGATGGGGAGCAAATGGCATTATACTCCTGCTAGAAAGTTAACTGTGCACATATTCTTAAATTATACAACATTCTGGAGAGCTATTGTTCAAAAAACAAACATTTCGCAGGCTAAAATGTGGAGATAGGATAAGTTTTGTAGACATATATAAACAATCAGTAATTGGATTGAAAATTTGGTGTTGTGAATTGCTCTTCATTATGCACCTTATTCAATTATCATCAAGAATAGTAATAGTTAAGTAAACACAAGATTAACATAATAAAAAAAATAATTCTTTCATAATGGCAGTTGAGGAGAACAATATGCCTGTTGTTTCACAGCAACCCCAAGCTGGTGAAGACGTGATCTCTTCACTCAGTAAAGATTCCC…	ARS1212.2	12	290000	290400	49.44	0.04	1	AAAAAATAATT	1	290192
AGGCAGAGTTAGATCTGATCATGGCCGGTATAGAAGCTGAAAAACTGGCTGGCAATGCGTCCTGGGGGGAATTATTTTCCACCAAGACCAAAGTATTTCAACGTTTGTTGATGGGTGTGTTTGTTCAAATGTTCCAACAATTAACCGGTAACAATTATTTTTTCTACTACGGTACCGTTATTTTCAAGTCAGTTGGCCTGGATGATTCCTTTGAAACATCCATTGTCATTGGTGTAGTCAACTTTGCCTCCACTTTCTTTAGTTTGTGGACTGTCGAAAACTTGGGACATCGTAAATGTTTACTTTTGGGCGCTGCCACTATGATGGCTTGTATGGTCATCTACGCCTCTGTTGGTGTTACTAGATTATATCCTCACGGTAAAAGCCAGCCATCTTCTA…	ARS1212.3	12	291200	291600	49.44	0.04	4	TAAATGTTTAC	1	291389
AGAGGGTGACGAACTGTAATCAGGGAAAACATCAAACTCTGTGCGAGTGCCATACCTCTTTCTATAGCAGCAACAGGGATATCATCACTTGGATTCGATGCAGCGCTTCTCAGCTTGGGTAAAAGGTCAAGGATTTTGAAAAAGAATGCGTCTGACGAATTTAAATATTCATTATTGAAAGGGGCAATGTTTGCCAAAATAGTTGTTGTAGAAGATTGAACTTTTTGAATGTCTTCCCTAAAATTGACTTTTAAACCGATTCTTCTCAATTCTTTCAATGCATCACCTAAAAGTTTACTTTTTTGAGTCTTCAAGTATGCCAACCTCTTTTTGTTCTCCTTTGTATATACATTAGGGGTTTCCTTACGTAACCTTTCAGCTTCAGCATAAAAGTCCGAT…	ARS1212.5.3	12	352800	353200	44.13	0.02	2	GTTTACTTTTT	0	352751
TCTTTTGCGTGTCGGATTTTACATCCGGCGGTAGCGCATGATGCCATGGCTGGCTCCAGATACATCCTCAGGGCACCAGCATCTATAATTAGATTGGCGCAACATGGCTGGCTGCACTGCTGTCTTCACTTCTTTCTTTTTCCGGCAATGAATGATGTATGTTTTGTGGCAAAAGGGTCCGCATTGTACCTGTTTACAGTTGAGATTATCGTTTTTGGTAGCCCTTCATTACGGCATAACGTATTAAGTTTCTTTTATTTTGCTTTGCCCTGGTTTAAAAGACAATGTCGATTAAAAGTTAATTTTAATCGATTGAAGGAAATAAGAGGAATAGCGCAAGTTGTTAGGAAAGCGTTCTTTATCTCCAAGACTTTGCCCTGTATATAATTAAACACCTCA…	ARS1213.0	12	370800	371200	38.1	0.77	1	TAAAAGTTAAT	1	371115
TTGCTGCAGCCACCGCTGCCGCGGCGCAGGCACAGGCTCAGGCTCAGGCTCAAGTTCAGTTAAACATGGCTGCGCATTCGCATAATGGCGCTGGCACTACTGGAAATGATCACTCAGATATAGCTGGTGGAAACAAAGTCAGCGATCATGTAGCTGCAAATGACACCATTACGGACTACGGTAACCAGGCCATACAGTACGCTAATGAGTTCCAACAGTAAACGTGTTTTTTTAATGTCCCTAACCACTCATTCTTACTTCTTTTTGATGTTTCTTTTTTTTATGGTACTCATAAAAGTATTTACGTATATAGTTGTATAGAGGAAACAAAAAAAAAAAGATAAAACTCAATTACAAAGTAAAGTGGACGTATTTCGATCATGATTTTTTTCTGTTTTA…	ARS1213.1	12	372800	373200	38.1	0.77	2	TAAAAGTATTT	1	372998
CAAAAAGACCCACTCTCTGCATCCTGAGTTGTCACTCATAGGTGAAACATGTTCTTCCGTGTACGTTATAGCTATGGATGTCATATACAACGAGTACCTGATAGATCCGTTTCTGAAGACGCTCAAGCAACTCAAACACTGGTTACAAACTACCTACAATTTGCAATTCCATGTCCTCGTGGGGATACACTTGCGGTCACAAGAGGTGACAACACTGTTCTTGGAGAAAGCCATCATAGAATATGACTTCACGGTTTATGATATCGTTGACCAGGTCATACAAGAGTCCCGTTTTAACTTTTATCTTATCACCTAGTCCCATATATAATAATAGAAACAATATAATGCTGATAATCTTATTTTTCTTTGCGATGCGGCAGTGCCTCTTCCCCTCCGTAC…	ARS1215.0	12	417600	418000	24.11	0.25	1	TTTAACTTTTA	0	418085
CGTTATTATTTGCTACGTGAAAATGATAATGCATAATCAACCATTTTATTCCACCCCAATTAAGCTTATACTCCTTCCGCTCAAAATATTCTGCTTGATAACTCTTAACATCCTCATCGGCTTCAGGAAGAAGATGTATAACTAAGTCATTGAGTGGTACAGAAAACAAAGAAGATGTTTCTCCAGGGTTCAGCTTACCAAAAAACTTACGGATATCTAAGGGAACTTTGTATTTATCCTCATGTTTTTCTAATTTATCTTTGTAAAGAAAACAGACCATTGGCTTAACACTTAAAAATGTTCTTGATAAATAGCATGGCATATCCATGACCAAATTGTCTAATTTCATTCCGAACTCCTTATGCAAGACCTCAGGATCATGCGGTAACCCAATCTCCT…	ARS1216.1	12	442000	442400	32.59	0.03	2	TAAAAATGTTC	1	442344
GTATAACCAGTGTGCACATTACCAATACTTGCGTTCCTGCTTCCAACTTCTTCAGTCAAGGATAGTGGTCTTGATAAATCTAATTCACCTTGCCTTATTTTTTCGGCGGCACTGTATTTGGAAATCAACTCATTCATATCCGCTTTCCTTTTTCTTCTATAACTTCTGCCATCGCTATTTTTTGATATACGACTATATGAGAGGGAACTGCCATCTATTCGCGAGAACTCCAATGCGCCTGGGCTTGAATAAGTCGAGGAAACCCTATATATTTCAGCATGCGGAAGGTCACTTTCAAATTTATGGGATGCACCATTTGATTCTTTATAGGGTTTGATGTAGCCAGTAAAACCTTCGTAGAATGCCTGCGGTGTCATTTCATTTGTAGTAATAGAGTTA…	ARS1216.2	12	444000	446000	32.59	0.03	3	TTTCAAATTTA	0	443916
GTCTATACAACCTGGCAGACAATTGTCTAAATAATATTTTGTAGGAATAAGAGTCCACTATCGTCTATCAACTAGTAGTCACACTACCAATATATTATCATATACGGTGTTAAGATGATGGCATAAGGTATGAGAAACTGTCATCGAAGCTGAAATGCAAGGATTGATAGTGTAATAGGATAATGAAACATATAAAACGAAAAGAGAAATAATCATAACATTATTTCCTAGAGTAGCGATTCCCCTTCGCGTATTCTTACATCTTCGAAGAGAACTTCTGGTGTAAGTATAATAAATATTATAGCTCTATCGAATGGTGCAATTATTTACCAAATTCTCAATAGGAATCCATAATACTACATACGATACTAATATTCTAGTATTTTTATACTTATTATT…	ARS1216.5	12	448800	450400	32.59	0.03	3	TAAATATTATA	1	449094
ATACAAGCACTCATGTTTGCCGCTCTGATGGTGCGGAAAAAACTGCTCCATGAAGCAAACTGTCCGGGCAAATCCTTTCACGCTCGGGAAGCTTTGTGAAAGCCCTTCTCTTTCAACCCATCTTTGCAACGAAAAAAAAAAAAAAAATAAAAAATAAAAAGACCAAATAGTAAATAGTAACTTACATACATTAGTAAATGGTACACTCTTACACACTATCATCCTCATCGTATATTATAATAGATATATACAATACATGTTTTTACCCGGATCATAGAATTCTTAAGACAAATAAAATTTATAGAGACTTGTTCAGTCTACTTCTCTCTAAACTAGGCCCCGGCTCCTGCCAGTACCCACTTAGAAAGAAATAAAAAACAAATCAGACAACAAAGGCTT…	ARS1216.5.0	12	460800	461200	0	0.57	3	TAAAATTTATA	1	460837
TTGAAAAATTGTAATCTGAATTACAACCCACAGTCTGACGCATTCATCTCCACTGCTGTTTCAAACGCTTCGTCGACCGGGGCGGCCAAATCCAAGAACAGCACTTCAATGCATTTGCACTATAAGCCATTAGTGTTAGTATCGTTGAAAAATGGTAAGCTCGAACTGTTGTCTAAACCACAAACGGCCACACTTATACTGAAAAGGGGCGATTTGGTCATTATTGATGGTGATCGTGGTAAAGATTTAGTTTTGGTGGTGGAACCGGTTGTAGATATAAATTTGGCACTATTTATAAATTTTTTGAAGAAAAAAATTCACTTTGATTCTCTAATCACCAATAGTCAACAGCATTTCCCCAATGACCAGTTTATCAAGACTCTGGTTGATACAACCAAT…	ARS1217.1	12	512000	512400	30.21	0.2	5	TTATAAATTTT	0	512285
AGGGAGCATCCGGATCGGTCATTACCAGTGTGAACAAATCGTCGTCTTGGGGAACGTACGCATTCGCCTGTGGTACGCTTTTTTGCATTTGCTTATTGAACGTGAACTGGAATTGGGGCTTGGAACGTGCCTTCTCAGTGGGCAGCGTGTTACCCATGGCAACAGGTGCACTTGATGAGTACTCTACGGCAAGTATCCCGGAGGGTTGAAAGCTTGTGTCATGAATTACATCCTCCAGAATGCCGTGCTTCTTGTAGGAGTCAATGCTTGCTTGTGCGAAGTCTATTGCTTGGTTCATGTTTTTTGCTTGTTCTCTTGTTCTTGTATTGATGCACTGGTAGGGAAAAGGAGCACTGCAATTCGTTTCTTGCTGCCCCCTTTTTATATACCAATTGAGAT…	ARS1217.2	12	513600	514800	30.21	0.2	1	GTTCATGTTTT	0	513816
CACAAAAGGTTTTCCAAGACAAAACGTTGTCGAGACTATTCTCTTTCGAAGAAATTCTAAAACACACTTCGGCAGGCCGGCAACAAGAAGGCGGCCCCTTGGGGAAAGGGAAGTCAATCCGTCTGCCCGTTCTCTAGGCTGATGGTAGGCAGGGCGATGCCATACTGGTGAAGTGTGGTCCGTCGGTCTGTCTCCTCCAAACGTTGATGTTCTCCTGGTAGCTTTCTCATCACCGTCAATATTACAAGTGTAAGAATGAGAAATGCTCTATATGAGGGTACTATTAAATTTCAAAAATGTTTACTTTTAAGAGGTATTTGCTAAAGCCTCATACAAATAATATAGACAAAAATGGGTAGTATGTAGTAGGACATTGAGAATAAAACTGTGAACCTGTTA…	ARS1217.4	12	522400	522800	30.21	0.2	3	AAAAATGTTTA	0	522604
TAAAGGGTTTAAGTATTGATTGCTAGCCTGAATGTTTCATATGCATACCGTGTCTATGCAACGAATATATTTCAGAAAAAAGCACGAAAGCCAAATTTTTGATGTTAAGAGGTGTTTTTGCCCGTAAACGGAGAAGACGTGGTAGGACTCGCAAATGTCGCGTTTAGCGTTGAAGAACATGGAAGTATTGAACGTTTGGGGCTTGACGGCTCGACTTTTTTGCACTACTCCGCCTTGAACAGACGGATGATCCTGGCGCAAGAAACAAAGAGAATCAACTCTGAGCAAAGCGAAAAAATGAAATACAACGATAATAAAAGGATAGGAAGGTGTATATATAAGTTAATTTTAGATATAGATTAAGAAAAGATGGGCATATACTAATATGACTACAAAATT…	ARS1218.0	12	604000	604400	42.89	0.17	1	AAAAAATGAAA	1	604115
AAAAGTTTATTCTACTACCGTATTTATAGGCCTTTCAAGTTTGTTTTTAGTCATTCCTGTATCATACTTAGCCACATTGCTAAATTTGAAAACACTTTCGAAATTCTGGCCAAGCGTAGGGCAGCTACTAAAAGATCACCAGTGGGCCGCTAACATTGTAACGGGGCTATTACCAACCTATCTCTTCACATTGCTTAACTTTGGAATCCCCTATTTTTACGAGTATTTGACTTCTTATCAAGGATTGGTATCATACAGCGAAGAGGAAATCTCACTTGTTTCAAAAAATTTCTTTTATATTTTTGTCAACCTTTTCTTAGTTTTCACATTGGCAGGTACAGCATCTAATTACTGGGCGTACCTCAGCGATACCACCAAAATTGCTTATCAACTTGCTAC…	ARS1219.2	12	622000	623200	43.69	0.02	3	TTTTATATTTT	0	622066
AATACAGATATTGCGCTGTGTATTATCATTACGGAAAGTGTGATATAAACAATGCTGTGTTGTATTCGGTCTTTTTTTTCCGCCTGGAGATTGTCGTTTTTGTTTTTTTTTCTCGTGTAGCTGCAGTTATCATCGTTTTGCATGTCTGTTCTGTCGGTGAAGCCGATCTCATGGCACTTCGCTTTGATACCGTAAAGAATCTTCTTCATTAATACGGCACTGCAAGGCGATATCTATCTCTGGGGTTAGGACTGATAAATAGGTACTTATCAGTTATCACTAGAGACGAACTGTTTACGTTTTGAAGCTCGACAGCAGGGGTTCTTAACGGGCGTCGGCCTAGACCTCACCTTGCGAGAAATTTTTAGTTCATATCCAGGGGATGGTGAATGGTTGGAT…	ARS1220.0	12	658400	658800	44.59	0.04	1	GTTTACGTTTT	0	658364
CACTGGACTGCCCCTGGATTAGCGACCCCGCGACCCCGCGACCAGACTCCCTGAAAATGGTAATTGGTGATGATATATGTGACTGAGTTCAGCCTGGGCATACAATGTTTAACCCTTTTGGACATGGAATTAGGCCAGCAAAGGGAGCAGCTTTCCCCGAAAGCGTAGTTTTTCTCCAGGAACGCAATTCACCCCTTTCTTTCTTATGCAAGCTCCTCGTACATATATAAAAATATATGAGTATATATAGTGCTTCTACAGCATAATCAATTTAAGGTTCCTTGCCTTTCCTTAAATATGTTAGCTATCTCTAAAGCATCACTGAGAAGTGGTAGTTTTTTTGATAACTGTGATTGAAGTTTTGACTACCTCAGAGAAAAATTTTGAATGTCCCGTGAC…	ARS1220.1	12	660400	661600	44.59	0.04	3	TAAATATGTTA	1	660621
GAGATCGCGCGGGAAATGGATATTGACAAATATGACACTATTGCTTGCGCTTCGGGAGATGGCATTCCTCATGAGGTGATCAATGGGTTATACCAAAGGCCTGATCATGTCAAAGCATTCAACAATATCGCCATTACAGAAATTCCATGCGGATCAGGTAACGCAATGAGCGTATCCTGCCACTGGACAAACAATCCTTCGTACTCAACTTTATGCTTAATTAAATCGATAGAGACTAGAATTGATTTGATGTGTTGTTCGCAGCCTTCTTATGCAAGAGAGCACCCAAAGTTATCATTTTTAAGTCAAACATATGGTCTCATTGCAGAAACTGACATAAACACTGAATTTATTAGATGGATGGGACCTGCAAGGTTTGAATTGGGTGTAGCCTTCAAT…	ARS1220.4	12	666800	667200	44.59	0.04	1	TATCATTTTTA	0	667081
TTATCTCTGGATGTAAAACAAATAAACGCGTAATAGAGCAGTCAAACTAACAGCAGTAAACTGTCAATATCAAAAACGTAACAATTGATTCAAATCAGTTTATTCTAAGCCGCCTATGCCAGCCTTTAATTTTCTTCTCCTCCTCTTCACTCCCAGGTTAAGCCATTTAGTTTGTTGCTATGCGGTGTGTGGCGTGTTTCCCTTTTAGGAAAAGTGATTACTTGCAGTTTCGCGAAATCTCGAAGAATTTTTTCAACTTATTGAAAGAACATGAATATACTTGTTAACGTGATTAAACGTTTTATCAGAACAACCTAAGAGTATCTCCTTGGTGAATTAGAAGCCAGATAATGTCATTTGATAGACCGGAAATATACAGTGCTCCTGTTTTACAAGGAG…	ARS1220.5.0	12	691200	691600	44.08	0.01	2	TTAAACGTTTT	0	691497
TACCGGTCTTTCCGCCACGAGCAGTTCTACCTACTCTATGCACGTAGGACTTAGCCGTCGTAGGTAAATCGAAATTGAGGACACATGCAACATTTTTGAAATCAACACCACGAGAAACACCATATTCCTTATCTTTCTTCACTTGGACCTTCTTTTTCTTGCTTGGTTTCTTATCGTTCTCAGGCTCGCCTTCCAAGCTTTTTTCTTCTTGATTTTCTGTATTGTGCCCTTCTTCTATTTCGTCATCTTCCTCTTTTATGTACTCGGTGTCATCTGTGGCAATCAATAGTTGGTAAACGTTTTTATTGAATTGGTCAACAATATGTTGCCTCGAATTAACGGGTAGCTCGCTGTTTAAAATACAGGACTTGATACCAAATTGTTCCATAACTAGCTTGA…	ARS1220.5.1	12	695600	696000	44.08	0.01	3	GTAAACGTTTT	0	695859
TTTGGGGCTGTCTGGAGAAACCAGTGAAAAGTGCGCACGCGTATTGCGGCTTAAAAAGATACCCGTCCATTCAAGAATGGCCGATTTAACAGAAAAGAGTAAAGAGATGAGTTTTGCGAGATCAGAAACAAAAACAAAAAGGAAAAAAAAAGGAAATTTTTTTGGGAGAAGGAAAAAAGGGTTAAGTCTGTAGAGAAACTCCGTAGTTCCCTTCTGTATTACTAATTGGTTACCAAGTAATAAATACCTGAGAGTAGTAATATATAAAAGAGAAATCGTATAAGGACCGTGTTAAATTTATATATATTAAGGAAGTCTTTCGGTTGGTAGTGTGAGATAACTAATTCTTTTTGGAGAGCCTTCTTCTTTGCTCTATCGTGGTAATAATCTACATATTCT…	ARS1222.0	12	723600	724000	38.43	0.14	3	TAAATTTATAT	1	723845
ATTAAAAAAATCTGATGGCTTGATACTGCGCGTTTCTTTTTATAGCATTAATACGCACACATACGCGCATTGTTGTTTACTATAAATAAACCGTGGGGACCTGACCCAGTCATCCTCCCTGTGTTTACAGTGCGGTGCACACGAGCCTGAGACAAGCCCGTAACCAGGCGCGTTGCCGCAAATACAGAGGCGCCCCAGACAACACCGCAGTGTGAAGCACTGTCAATTTAAAACCGTGGCTTGCTGGAGATGCCCAGACCAACCCTGTTGGGTTTTTCTCTCGAGCACGCCGTTATAATTTTAGCGTGTTCCGTACCTGTGTGCACATCAATAAGCGGTGTAACAAACTTGAACTTGCCATCTCATATCGTCATATGAGCAGTTGCAGAGAAAGGCACT…	ARS1222.1	12	728400	728800	38.43	0.14	3	TTATAATTTTA	0	728607
TGTTAATTGGCGCTCACGGAGCACCGGGACGGGCGATCCGTCCTCGGAAACAGCTAATAAGTTGTTCATGGAATAAATTGTACTCACAATTGCATCTTCATTTAGAGGGTATAACCCTGTGGTGAATATTTTTGCAACATCATTAACTGTTTCAGTCGTGATATGTGGAGACGCTACCAATAAAGGAAACATACGAATCAGAGTTAATGACAATTTTTCCGTGAAAAAATTCAGTAATGAGGCAGAAGCTACAATTGCTTTTATCAAAGATGGTGTAACGACATCAGATAAGAAAAATTTATCAATAGATTCAGAAACAACGTTTGTAAAACTTTCAAAAAGCTCGCTTTCTGTATCTTCTATAAACGGAATTAAACATAGCGTTTGTAGGTAGTGGGC…	ARS1223.1	12	742400	742800	33.66	0.2	1	AAAAATTTATC	1	742746
AAAGAAAGCAAGCGGAGCTCATGCATCAAAAAGAAGAAAATGAGAAACATTCCAATGCCAATACTGCACCTCCAGTAGTTGGTGGCAACAAAAATGTGAATGGAAACAGAAATAATAGTAAAATGTATAACAGACCGCCTGTGACAGCTCCACCTGCACCAGCATACACGCGCAGTACTAACGGTCGCCCCCAAAGAGGTTACAGGTGAACAAACCGGCCACGGTAAGGCTACATTCTTATCAACAAATATGGGCAATCAAAAACTTATAATGTAAATTTTATTTTTTATCGTAAACATGTATTTAAGAAGTAATATAAAGGATGTTTGACATGATCATTTTATATATGCATACACGTTATTGAAGTTATATGGTCGTTAAATCATTAAAAGGCCCGTT…	ARS1226.0	12	782800	783200	32.93	0.03	6	TAAACATGTAT	1	782978
CACAAGAAAATACGAGATCATAACAGTTCGAGTCCGTTTATTGTGTGCGGTTTTGGTACGCTTTTTCGTGAGGTGTACTACCATTCATGAGAGTCGTTTTAGGAGCTGTCATGAAAGATATGTATCTTGTTGATGAACTGTAAAAATTTGCAGAAATTGCGCTATTCCGTTTATTTCATTGTCGATTCGGTGTTAATATTAGGGGTACAAAATATACTAGAAGTTCTCCCTCGAGGATATAGGAATGCGCAAATGGGCATTTGATGTGACACAAAATTTGGACAATATAACGATTCATTTTTAGATCGTTGTTCAACCGTCCCAGTGGCCGAGTGGTTAAGGCGATGCCTGCTATTTCCTCAGAAAAGCAATTAGGCATTGGGTTTTACCTGCGCAGGT…	ARS1226.1	12	784000	784400	32.93	0.03	1	ATTCATTTTTA	0	784326
GTCTCAATTGGAATTTGAATACCCGATGGTCTTCTCCATGATTTCAAGGCTCCGATTGAAGTGGCAACAAAGTTCGCTCGCTCCGATATCCTACGCCCTAACGAGCAATTCAGTACTTCTTCCAATAATGCTTAACATGATTGCCCAAGACAAATCTTCAACAACCGCGTATCAAATTCTGTGTCGAAGAAGAGGTCCTCCAATTCAGAATTTTCAAATTTTTTCCTTACCGGCTGTAACGTACAATAAGTAGCATGCATAAAATATAATTTAATCAAATACTTTTGGGCAATTAAAATTTTAGTTAACAATAGTTATGCAATGCGCTTTATGTTCATATGATACCGTTTATAAGCTATTGCCATATCCTTATCTTATTGCTTCCAGTAGCCTCGAGTC…	ARS1226.2	12	787200	787600	32.93	0.03	5	TTAAAATTTTA	0	787371
GAAAAAGGTTCAGAGGCAGAAGACGATATCAACAACGTTTCCAAGGAGGCTGCCTCTGGTGAGAGTACTACCCACCAAAAAACTGAGGCCTCTGCTTCTCTTGAAAGCAGTGCCGTCACGGAAGAACAAGAGACAACGGAAGCCGAAGTAAATACAGATGACGTTTTGTCCACTAAAGAAGCTAAAAAAAATACTGGCAACAGCAACAGTAATAAGAAGAAGAATAAGAAGAATAAGAAGAAAGGGAAAAAGAAATGATTAATGGATGCCTTCAATGAGTTCCACGACGCACGTTTATTTTTTCGACTGAGAATCCCTCAGCAAATATAATCTATTTTTTATATATCTGTGTATATGTAAGCATGTATAACTAGTTACAAATATGATAACTGCTTTGGC…	ARS1226.3	12	788800	790000	32.93	0.03	1	GTTTATTTTTT	0	789712
TGCAACGAATTGCGTAAGGGTGGCTAGCCGAGATTTAATGACGACGCAAAAGGGAATAACTGTGACAGGAAGATGAATTCACAAAGTTTATAAAAAGAAAGGGCGATGCACTGCTACATGGTTGAACAAGGCACTACATAATTCACAGCTTGTAGCTTGTAAATAAAAAGAGCATTCACGCGATATACGATTTTCAATGATCACTCTAAGAGGAACGGCGAAAAATAGAATTCAATATGAACTGGAATGGCAATTATGATCAGTTAAATATACAATATTGTTGTTGCAATTGTATTACATTTAAATAAGAGCATGTATGTGATAAATTACTGGGAATTTATGGTATAGGTTCCAAAACGCCACCGCCCAAAACATTGTTATTAATGAAATAAGAATCAA…	ARS1226.4	12	792400	792800	32.93	0.03	1	TATTACATTTA	0	792805
GTAATATAATCCGTGATAGTTTAATGGTCAGAATGGGCGCTTGTCGCGTGCCAGATCGGGGTTCAATTCCCCGTCGCGGAGATTTTTCATTTTTTTTTTTTTGAGCCACAAGAGGTATAGTTCGACAGAAGAGTTCTATTAAAGTTTTCCTGTTATTTCATTTGGAATATAACCCAAGTTGCTTTTCTTTGATCATAATTATTTCCACCTCTTTAATGGTTTGTTTATTGGTTGATTATTTCAGCCTTTCTTTTAGGTTCCTTCGCATTACATTAAACCCCGTAACTAAACTTAAACTTTAAAAAAAAAATATGGACAACTTCAGGAGATAGATACAATAAAGCATCTTTAAAATTTGAGCAATGCTTTGCTTATTAACCAGCAAATGAAGACTATGAA…	ARS1226.5	12	794000	794400	32.93	0.03	5	TAAACTTTAAA	1	794199
TCCTTATATATGATGAAGAAAAATTTTCTTCGGATGTTGGAAGAGAATGTTCGATAATAATCGTTACATACGATTGTCACTGTAGCATTTGTTAGGGTTCAATCATATATGATAAGCCCAATTTGAGACCAAAATCGTACATTGGACAGGACCGCATCACGTCAGAATAGTTTTTGTGCATCTATGTAATATAATACGGTTGAATTATCCTTTTATAATGATGACTATTTAATTATTATATGATTAAACAAAAAAAAGAAGAAGACAAACAACTTATTACCTTATTTCTTGATTTTATATTTATTCGGAAGCAGCAGCTCTGGTATAGATAGCTTGCTTGGAATGCTTCGAGATTGGCTTGATGATACCTTCCTTTTCCAAGTGCCTCAAAGCAATTCT…	ARS1226.6	12	795200	796400	32.93	0.03	8	TTTTATATTTA	0	795563
CCCTTTTCACCAGGTACGAATTATACATAAAGAATATCTTAGAAGCTCCCGTGAAATCTATCGAGAATCCAACGCAGACAAAGGGAAATGATGCTAAACCTGCCAAAGTAGAAGATGTCCAAAAAAGTTCCGATTCTTCATCTGAAGATGAGGTTAAGGTGGAGGGACCCAAGTTCACAATAGATGCTAAACCGCCTATTTCAGATTCCGTTTTCTCATTTGGCCCAAAAAAAGAAAATCGCAAGAAAGATGAAAGTGATAGCGAAAACGATATAGAAATCAAGGGCCCTGAATTTAAATTTTCTGGAACTGTATCAAGTGATGTATTTAAGCTGAATCCAAGCACCGATAAAAATGAAAAGAAAACCGAGACTAATGCTAAACCATTTTCATTTTCTT…	ARS1226.7	12	797600	798000	32.93	0.03	1	ATTTAAATTTT	0	798072
GAGGCGGAGCTGGAGCTGAAGTTGCTTTTTTAGGTGCAGAGGTCACATTTGGTAACGATGGTGGAGGTGGTGCAGTAGGCGGTAATGGCGGAGCATGTGATGTAGGAATGGGCGGAGCAGATGATGGAAGTGGTGGTTGTGAAGGAGATTTATGATTTTCGGTTTGAATCTTTGTGGAAGAAACGCCCTCGACGGCTCCTCGTTCAGACCTCCTGGCATTAATTTCTGCCAAAAATGGCAACCCGCCTGCAGGAACTTCAGAAGATGGTGGTGAGACTGCGTTATCTGTAGGTTTAATGTTTTTTGAGTCCAGGCCAATTGTTGGAGTTGGGGGAGGGGGTGGAGCTTGTGGAGGGTTGCTAACATGTGTTGGCAGAGACGCTGAAGGCAAAGGGGGTG…	ARS1226.8	12	804000	804400	32.93	0.03	1	TTTAATGTTTT	0	804340
CATTTTTCAACGACTTGTCAGGTCAGCTGGCCATTTATGATGCCCTAAACATCCGTAAAATTGACAGAAAGAATTTGGAGACAACGTTTTCTGAAATTGGAGTTAAAGTACTCTTCATAGAATCAATCGTGTCTGATCAAGAAATCATGAATAGAAACATAGCTCTTGCACTGGAGTCGAACGATTACAAGGGACTTTCAACTGATGAAGCCATTGACGAATATATGAGACGTTTATCAGTGAACGAACCATACTATGAAATGATGACACATGACGAAGAATTATCGTACATTAAATATATAAATTTGGGAAAGCAGATAATTGTGAAAGATAACATACATGGTTATTTGGTCAACAAAATAGTATTTTTCTTAATGAATTTGAGGCAGAAAAAGGGGT…	ARS1227.1	12	821200	821600	46.1	0.02	1	TAAATATATAA	1	821279
GCGATGCTTTGCACATCAGATAGAGACTCCGCAAGAAGTTATTCCCATTATTATTTCGGTGTCCTCAATGGATAATAAACTGTCTTCTCGCATTATTCAAACGTTTTGTAATTTGAAATACTTAAAACTCGATGAGCTTACGTTGAAAAAGGTTTGTGGCGGAATCTTGCCATTATGGAAGCCTGAACTAATCAGTGGTACAAGGGAATTTTTCGTTAAGTTTATGGCCAGTATTTTTATGTGGAGTACACGAGATGGTCACGACAATAATTGCACATTTTCTGAAACTTGTTTTTACGTTTTACAAATGATTACAAACTGGGTTTTAGATGATAAATTGATAGCACTCGGGTTGACACTACTGCATGACATGCAAAGCCTGCTAACTTTGGACAAAAT…	ARS1227.5.1	12	881200	882400	40.4	0.02	3	TTTTACGTTTT	0	881107
GCTGCTAGGTCTTTCTTAACTGCTAGTACCTCACAGGATAAGTATAGCCATTTTATGAAGGGTACTTTACTTCAAGAAATTACCGAGAATTTGCTTTACGCCAGTGCTATTCACGATAGTGCACAAGAAAATATGGCTCTGCACCTGGAGAATTTGAAGTCTTTGAAAGCTGAATACGAAGATGCCAAAAAACTGTTAAGGGAATTAAATCAGACTTCAGACTTGAACGAAAGGAAAATGCTTTTGCAAGCGAAATCGTTATGGATCGATGTTGCCCATAATACAGATGCTTGTAAAAATTTAGAGAATGAAATCAGTGGCATTCAACAGAAAGTTGATGAAGTTACTGAGAAAATTAGGAATAGGCAAGAAAAGATTGAAAGATATACATCTGATGGT…	ARS1227.5.3	12	886000	886400	40.4	0.02	1	GTAAAAATTTA	0	886253
ACGTTTTCATGGACCAGGTTAACAGGAAGATTGGTACTACTCTCATAGTGAAAAAACTAAAGGATATTGCCAGAACTCAAACTATTATCATTACTCCTCAAGATATCGGGAAAATTGCAGATATCGATAGTTCTGGTGTTAGTATCCACAGAATGAGAGACCCTGAGAGACAGAATAATTCCAATTTTTATAATTAATGTTTCTTCATGTAATTATTCAAAATATTGTGTAATCGTCTATTTGAATTCGTTTTCACGGCAGCATATTTGAAAAAAAAATTAATTTTTACATCTAAACATAAAAAACCTAATCGTTTTCTTTCCATGCTGTTATAGAGACATTTATTAGTACGAATATTTTCCTTTCTTTACGAGCACTATAGACAGTAATTTATATAAC…	ARS1227.5.4	12	888800	888800	40.4	0.02	5	TAAACATAAAA	1	888726
AATATCATATCTATAGGCCTTACAGTACAAAGCTACGGCTTCTTTAACATTGTCCAAATATTCCAATTGAATATCAGCAGCATCAACATATCTATGTTCAAAAGTCAAAGAAGATATCAACTCTTCTGCGACTGACTCAACTTCCTCTGGGAATTTCTGAACAGCGATGGACATGGCCTCACGCCATCTTTTCGCTGATTGGTATGCCCCCATTGCTTCTTTGAGCTTTCCTAGCATCTCGTACGCCACCGCCGCATCCGTATACATTTGATTTGATGACAAATGCTTTGCGTAAATGTTATAAATAACATTCTGCTTCTCAGAATCATAACGGTAAAGTGCTAAACCATGCTTATACAAATCATGAGATTCAACATAGTCTATGACTTCCTCTGAAAC…	ARS1227.5.5	12	889600	890000	40.4	0.02	1	TAAATGTTATA	1	889816
AGCCGTTGAGATTCGACCGCCTTTTAGCTTGTTTACTGTGGCAAGGGAGAAAAAATCAAATTATTTGGGAAGGAGCGACCCAGTAGGCTTAATTAAGGGACAAGAAAAACCCGCTTTGTTTAAATACTTCGCGACGACGCGCGACAAGCGACGACGGCCGACGTTGTGAGTTCACGGAGCAAGCCTGAAGTTGCTGCACACACAAAGTGCGCGGGGCTACTACAGCGGGGGCACGGGTGCATACATCTTCAAGAAGAAAAAGGTGCTGGGTAATACAAACACGAATCGACGTAAAACGTTATTGTACTTCCTTTCCGCGGCTAATAGCAACTGCAGCGTAGGAATAAATATGCCAAAAGTGTAAATCCAAGCGCCTGATACAAAGTAGATGTTGAATTG…	ARS1229.0	12	922000	922400	45.38	0.03	1	AAAACGTTATT	1	921903
GCATTACCCTCGGTTTCGCGCCCTTCCAGTTGGCATTTGAAGTGCCAATCCAATTGTGAGCACATCCAACTAGCGTGCCCTTGCAATCCCAGAGGACACCATACAACTTCCAGCCTAGTAGTGAACTTACCAGGCGAGGAGCGCGGGCGCCAGAGGGCAGCTCATCTGCGTTCCGGCTCTAACGAGAAGGGCGGAAATGGCACCATCACCTGAAAAAGAACGTAATCTAGGCTGAGCCGCGCCTTTAAGTTTTTGTCGCATCTGGCTGCGCTTCATTTAAACGGCACTCCTAAAAAATTGTATGAGGTGATTTTTTTTGTGTACAGATGTACGGATGTACGGATGTACGGATGTATACTATGTAATAATGCACGGATGTAGAGAAACAGAAACGAGGAT…	ARS1229.4	12	932000	932400	45.38	0.03	1	AAAAATTGTAT	1	932223
GAAGATGCTTTACAAGTCATAAATGCAGGCTGGACGGAAACGAGAAAGTGGGCTAATGCTGCCAAGGCATGCCATGACTGAGTGTCGACGTCCTTTTTGTTTTGCCTTATAGCATCTTTTCCTTTCTTCAAATTTGCATTACACAACTTTAACTCAGTTAAAGAACTTCGTCATTTACTTATTCTTCTTTTTTTTCTTACCCTTCTTTCTCAAATCTTATTTCTGTATAAAATACGTATTGATTCATTCCATTAATAATAACATATAATAATAGTACTAATTTAAAAACATTGAATATATTTATCGTTTTATTTCGAGTTGCGATTCTTTTCTATCAGTTGGTACGTCATTTCAAGGATTCGGAGATCCCTATCCACAAGCTCTGCTTCCTTTTGTAAT…	ARS1229.5	12	933600	934000	45.38	0.03	1	GAATATATTTA	0	933865
AGCTGAAACGCAAGGATTGATAATGTAATAGGATCAATGAATATTAACATATAAAATGATGATAATAATATTTATAGAATTGTGTAGAATTGCAGATTCCCTTTTATGGATTCCTAAATCCTCGAGGAGAACTTCTAGTATATCTACATACCTAATATTATTGCCTTATTAAAAATGGAATCCCAACAATTACATCAAAATCCACATTCTCTTCACTTCTCCGATAGACTTGTAATTTATCTTATTTCATTTCCTAACACTTTGATCGAAGAAGAGGGATAACAACAGACGAAAACACATTTAAGGGCTATACAAAGATGAATATGGGAGGCAGTAGCAGCACTGCTGCCAAAAAAGCGACTTGTAAAATATCGATGTTATGGAATTGGTATACCATTG…	ARS1231.0	12	947200	947600	48.33	0.02	1	AAACACATTTA	0	947224
GAATGGAGAAAAATAGCTCCCCATACTTGCTGGATGTTCAATACCGTATGCATCCTTCCATCAGTAAATTCCCCTCTTCTGAATTTTATCAGGGACGACTAAAAGACGGCCCTGGTATGGATATCTTGAACAAAAGACCCTGGCACCAGCTTGAGCCATTAGCTCCCTACAAATTTTTTGACATCATTAGTGGTAGGCAAGAACAAAATGCGAAGACTATGTCTTATACAAATATGGAGGAAATACGTGTTGCCATTGAGTTAGTTGACTACCTTTTCAGAAAATTCGATAATAAAATTGATTTCACGGGAAAAATCGGTATAATTTCACCTTATAGAGAGCAAATGCAAAAAATGCGTAAAGAGTTTGCCCGCTATTTTGGAGGCATGATCAACAAAT…	ARS1232.0	12	998400	998800	49.33	0.02	1	TAAAATTGATT	1	998642
GGGTAATGCGAATCAATACTCAACGGCTCCTGTGGGTACAGGCGAACTGCATGAAACTCTGCCCGCCCATCCGCAAGACAGCTATCCTGCTGAGGCAGAAGATCCATATGATTTAAACCCCCATCCGCAACCACAATCTTCAGCATTCAAAGGACCTGGTAGTGGGCCCACAGGCACACGCAACAGTTCGAGACGGAATGCTTCATCTAGCCCATTTATCCCAAAAAAAAGAAAGCCTAGATCATGATCTTGAAGTAAAAGTGTTAGGAATTATACCTGCATATATATTGGTGTATACATTTATATTGAATTTAATAGCAACATTATTTTTCATTATTTTTCATTATTTCAGCAAAAAGAACATTTTTTTTCAATTTGACGTGAAAGAGTTTGACTATT…	ARS1232.1	12	1000000	1000400	49.33	0.02	5	GTATACATTTA	0	1000170
CTGAACATGGTTATTAAGCTCGGGAAGCCTGTTACTTTATTGTTTTTATACATTCTGTACCCAGCATCCTGTGCTTCGTGTGCTCTAATAATAGATAACAAACCATTTGCCTTCAAAAACTTGCATGATGCTTTAAAAGTGAAGGCGAAAGAGCAACCCCTCAAACTGTTAGGTACGAATTCATCCTCGCTCTGATCAAATTCGCTACCATCTCTTGCATCATCATAATTTTCGACAGGATCGGCCCATAGTAGGTCACACATGAGACCACGAGATGGGATTTCTCGAAATCTATTAATTTTATTAACATCCTCTACTGATTTTAACTCTGGAGAGATACCACCATGCACACAAAAATATTGTCCGTTCATTAAAGCTGCTAATGGTAAGACATTGAAT…	ARS1232.3	12	1004800	1005200	49.33	0.02	1	TATTAATTTTA	0	1005268
TGTAATGATTGACGTGCTGACATTTGGATCTCTTTGACTAGCCTTGGTGTCATCACTGCCACCATTGCTGTTATTTCCACCCCATTTCCATTTGAAAAATGAAAATCCGCCGTTACTACTGTTGTTGCTATTACCATTAGTGGAATTATTGTTATTAGTCTCAGGAGCAACATGATGAGAATTTGGTCTAGTTCTTATTGAAGAACTATTAGAAGTAGTCTTCTCTAAAGTAATGGAGGACGAAGACGAAGACGATCTTAAATGCTGAAAGTGATTTTGCGCTGTGTTCTGAAAAAAATAATTCATCAAGTTGCCACTTCCGTTACTTTTTGTTCTATTTAATGCCATTGTTGGGGTACTTACACCTGAGCCAGCGCTTATTGTTCTTTCTAAGCTTAC…	ARS1232.4	12	1008000	1008400	49.33	0.02	1	AAAAAATAATT	1	1007972
TTGAGTGTGCGTGATGTTGTGTGTGTGTGTGTATTTATCTGCGTGTCTCTCCCCTGTTGTATTGGTTGCTAGAATGGATGGAAACATCCTGCCTCTTGTTTGTTCAAACCTCAGCTTTCTTGCTTTTTTTCTTCTTTCAATATCGCGACCTATCACACAGCACGGATAGCCAAAAGGGCGCATCAGGAAGAAGAAAAAATATCATTTCAGCAAACTAAAAGAATTGCCCTGAAAGCTATCGAGCCCTGGTAAGAGAGTACCATTCTATCTCTGCGGCTAGAAAAAAATACCATAAAAATATAATAAAAATGTGGAAGAGATCGTTCCACTCCCAAGGAGGGCCCCTGCGTGCCAGAACAAAGTTTACCAAACCAAAGCCAAAACAACCGGTGCTTCCCA…	ARS1233.1	12	1014000	1014400	46.64	0.09	2	TAAAAATATAA	1	1014470
GAGTGTGCGTGATGTTGTGTGTGTGTGTGTATTTATCTGCGTGTCTCTCCCCTGTTGTATTGGTTGCTAGAATGGATGGAAACATCCTGCCTCTTGTTTGTTCAAACCTCAGCTTTCTTGCTTTTTTTCTTCTTTCAATATCGCGACCTATCACACAGCACGGATAGCCAAAAGGGCGCATCAGGAAGAAGAAAAAATATCATTTCAGCAAACTAAAAGAATTGCCCTGAAAGCTATCGAGCCCTGGTAAGAGAGTACCATTCTATCTCTGCGGCTAGAAAAAAATACCATAAAAATATAATAAAAATGTGGAAGAGATCGTTCCACTCCCAAGGAGGGCCCCTGCGTGCCAGAACAAAGTTTACCAAACCAAAGCCAAAACAACCGGTGCTTCCCAAA…	ARS1233.2	12	1014400	1015200	46.64	0.09	2	AAAATATAATA	1	1014472
AGGCGCGAGGCCCTGTAATATGGCAGTTGATCAAAAGTCAATAGATAATTTTCAAGCAAAATCTCATTTAGGTTTGACTACTTTCTTGAACTTGGAAGAGAAGCAAATATATTCAACGAAATGACTGCCCAACAAGTATGTGTAAAGATGAGTAAATTGAAGGATGTGATGGTTATGGAGATGGCACACGTGCCTAGAGGAAAATAGTTACCCAAGAACAAAAGCAGGAAGGGAGCTAACCTTTTAAATATGAACTGGACAAAACTGGACAAAATGAAAATAACGATTTTAGTAAAAATGAAAATATAGCATCAAATGACTGAGAAACATAGTAACAATAACTCATATTATAGCTAATCTGAGTAAACTTCTTCCTACGCTAAGAATTTTTTTGAGGAT…	ARS1234.0	12	1028800	1029200	41.23	0.02	3	TAAAAATGAAA	1	1029020
TAGGTAAGAATACTTAAAGAGCTTCGCCGGATATTATTACAGTGTATTAAATTTCGCCAAGTCTTTGCCAATGGAAATGGGTGCATAAATTTATGTGCTTGGTACATATGAGTTCAATAGATATGTAGTAGTTGGATAGTAGATAGTTAGGATATATAATCATGGAAGGGTTACTCACAACGAATCACATAATGAGTTATGATTTTCACTGTGCTCATCTGTTGCCCCTACAAGGGGTGATCAATAACAAACAATTTCATTAAAAAAAAAAAAAAAACTAAGTCACTATAACTAAACGTAATAACTATGTATATGAAAGAAAATAATATCTGTTCGTCATCTAGTTTAATACGGCAACGAGTTTTTCACCAGAGTTCTTACCATATTTGATGTCTTTTA…	ARS1235.1	12	1059600	1061600	67.83	0.03	5	TAAACGTAATA	1	1059705
AATTTCTCTGTGCCGTCTTCTCTTCACTTTATTTCAATATTATCATGCAGTAAACAAGTTGCAGAATAATAAATAATATACGTACCAAATATGTGAACAACTCAGATACTATTCATTTGATATGTTAAAAGTCCTGCATTCCTCTCCCGACATTATATATAAAATGCTCAGCCACCCCTTCGTTGCACAGAAAAAAAGGATGACCTATAATACCAATATTCAATCACAATAGTTATACCAAACTAACACATGGTTGAAGCAGACTACTTACTATCGTGGAGTTAGCTCACTGAAAATTTAATATTTACAGCATTAAACAGTTTTTTCTTTTGTTTTGTCTCCTACATTAATTTCAATATGGATAGCCAAGTAGAAGGCAAAATATCCCCCTCACAGAAG…	ARS1303.0	13	32000	32400	41.47	0.1	2	AAAATTTAATA	1	32267
GATAGAAATACACCGCTGTCATGCGATTATATAGACATGGGGCATTTAGACACTGAAAGTCTTCATATCTCAACATGCAACTAGTAATAGTACAATTTTTAGTACCCTTTAATCTTTATTGTTCGCTCCCTAATAACGAAGCCTTGAACTGTAACCAGATCCCAGGTTACCCCTTATCCTTAAGAGGTCTTTTATTTACTCTACATAATATATATTTTTCAATCCATTGAAGAGGATTAAAAGAAGAAAAATCAATACCGAACAAAAAAACAAAACGAAATAAAACAAAACAAAAAATTAAATTAAATTAAATTAATATTAAATGTCATCATGATTCTTACTCTGATTGTCTTCTCTTCTCTCTTTCCCTTGACGCAATTTCCTTCAAATCGTCATCGC…	ARS1304.1	13	40000	40400	47.31	0.11	4	AAAAATTAAAT	1	40140
GTGAACGTGAACATGAACTTTACTATAAATGGGAGCAATCAAGACCCGTCATCTTCTTTCCTGATGGGGCCCTACAACTACTTACAGCGGCCTTTCATTGTGAAACCATATCTTGATCTGTCCACAAGCACAGCAGCATCAAATCAGCCACGGACGCAACCATCGCCGGCAGCACATATCACTAAGAATTCCGATTCTACAGAGAAAAACGCAACCATATGACATTCATTTCCAGCATACCACTAAAACATTCGTATATGCCACATAATAACTAGTTGAGAAAACCATAGATATTTATATTTATATGTATTTGTACTTCTTTGAGCAATGTATATTTAAGACTGATCTCAACTTCAGCAACTGTTCAAATTCACTGTTTTTCCTAATTAAGCACAACAT…	ARS1304.4	13	44400	44800	47.31	0.11	1	ATTTATATTTA	0	44860
AAACGTTGATCCCGATAGACATGATTTCCCCCCTTCTTATCAAGAAGTTCGCACTCAAAGAATGACTATATTGCCCAGCAATGATAATTCCGTGGAAAGGTCACAATTGACAGCAGTGCCAGGATCCGAAAACGCATGTAATAATGCGACTGCCCATTCTCTTACCAACCTACATCCTCTACAAACACAACATCTTACAATAAACAGTACAAGAAGTGGTGGACAGTCGCTCCATTCTTCATCAGACACCAATATCAGTCAAATACCGTTCGAAGATGATCTAAACGACTCGGATAACATTTTTATAGACAAGTTATACACCTTACCCAAGTTATCCACTCCTATCGAAATTGATATAAGAATAACGAAAACTGCATCAATACCTCATGAGCGTCCTGA…	ARS1304.5.1	13	47200	47600	67.01	0.02	2	GATAACATTTT	0	47591
CTACCAAACGTGCCTCTGAAAGAATAAACCATTCCAAAAATAGACATTCGCCAATTTTCCAGATACATTCTGAAGAAGCAAAATCCGTGGTAATCACTCCTTCAGTCGTTTCTTCATCTGAATCCCAGCCATCTAAGCCTACTGCACCGGCAGTCGTGGAGAAAAAGGTAGAACTGCCTACTGACACCCAAGCCAGTACACATAAGAAAAATTCCTTGGAGAAAAGGCTTGCCAAATTATTCAAAAGAAAACAACATAATGGTACCTGCAAATCAGATGTGAAAGTAATCAAAAAAAGTGTTAAAAAAGAACTGAAAAAGAAGGCTTCGCATTCGAGTTTATCAAAATTCAGGAAAAGTCCCAAGAAAAAGCCCCAAGAAGCGGAAGTTGAACGCCCTT…	ARS1304.5.2	13	53200	53600	67.01	0.02	1	AAAAAGTGTTA	1	53674
AAGGCCCGAAGATCGTGTAATCGGAAACCAACAAAATGTTTAGAGCTTTCTTGTACCAAATCATCATACAATTGCACGTGGCTCTTACATTTTTCAGGCAACATTGAACTGCCATTATGGGATTTCTTCTTGTACCTCCATTTGGTAATAAGTCGCTCTCCTAGAGTATTCCTATATTTTCCCGGTAAAAGTTTGGTATTCTTGTCCAGCGAATGTCTAATAGACTTCAGTCTAACCTCCAATGCGTCCTTTTCCATTAGTAACTGCCCTACTTTCCTGTCAATTCCTGGGGAATAATGTTTTATTTCTCCTTTACCATAGATTTCAAGATGACAGTTACTTTCGTTCCGAATGACTAGCGCTTGAAAATTTTTCAAACATTTTCCATATTCAATAAGC…	ARS1304.5.3	13	56000	56400	67.01	0.02	3	AATAATGTTTT	0	56303
CTTCTCGTCTCGCTCAAAAATCGCGTTCAGGGTAAAAGGGGCGAAACAGAGGGCCAGATAGAAATTTCGAGAAAAGCGGGTCACCCCGCCCCTGCATTTTGATATGGCGTATTTGGGATTGCTTGCTCGAAAGTGTCTAAGTCCGGCTGGCGGGCCTGGCGCCCTCGCCGAAGGGAGATAGGAAGGGGCGGGGGTCCGGGCAGCGGCTATGGTGTCAGTTACCTAGGGAAGGAGAAGGGGGTAGAACCAAGGGGCTAGCACACTCACCCTGGGGCCCCCGTCTAGCCAAGCTTAAATATAAATACTAATGTAACTATAAATATAAGGATCTACCGTGTCATTGCACATCCACCCACCCGTCGATTAAAAAACCAAACAAAGCAAAGAATACAATAGCAA…	ARS1304.7.0	13	70000	71200	63.11	0.02	1	TAAATATAAAT	1	70500
TCAAATATACAGCTTTGCCAAGCGTGCGGCATAGGGAATAACAACAAATTGGAAATGTGCGGCTAGCGTAATCTTGGTATCTACTACCGACTCTGAAGAGTTTAGCGGGCTCTCAGACGGTTTTTTCGCTTTTGGCATTTTATTCAGGTAGCCTTAGATGTTAAATTTTCCATGGCATCTTGCGTAAAGCCTGCTAGGTTCCTTGCCACGTATAATTGCGCCGCGAATTCTGTGATAAATATATTGTAAGATTTTCTGTTGTCTTGGAATTGCTCTCTCTTTAAATAATACTTTATATGTTTACCCCAATTCTTTGCCGCCGAAAGGTCAGCGTTGCATTACGTGGTGTCCGGTCGCTATTTCCTGGGTTTTCTGCGGCAGATTCGCACTGCGCGCCAC…	ARS1305.0	13	91200	91600	49.33	0.15	1	TTATATGTTTA	0	91668
AGATGAAGATGATGAAGAGTTTCTCAGAGCCATCAGACAATCAAGAGTGGAGGACGAAAGGAGAAGACATCTTAGAAATCATACTACAGGTCGACGAAATGGGCCCTTGAGCGACGATAATTTTGCTACATATGGTGCAGCAGAGTCATCCGAACGAACCTCAACTGAGAACACTATCGGTAGTTCTGTTGGCGTTGATGCTAGTAATAATGTTGATGAAGACTTACAATTGGCCATTGCGTTGTCATTGAGTGAAATCAATTGAAAGTATGTACATTTGGAAGAGCATATGTTAAATATTTTATTTATAGATTTTTCGTTGTGAAATATTATTTTTTTTTTTTTGAAAAAAATGTCGGACTTTATTCCTCCTAATTATTAATAAAATACGAATATATA…	ARS1305.1	13	94000	94400	49.33	0.15	5	TTAAATATTTT	0	94267
GCAATATGGGTGTTGGCAAGCACCTGGGGCTGGAGTACCCAAATGTCAGCGAATGTTGTTGATCTAACGCCAATATGATTGGGGGCAGAACGGGCGATAGGCACTGCCTGCCTGGAGGTGTTCTGGGAACGTGCGCCTGGTTGTTGTTATATACATGTAAATAGTCCATTGAGTCTTTACCAGGTTCTATCTTAACTAAAGAACTACTTCTACACAAGACTTAAGGCACCTTCATACGAAAACCCTCTCCACGATGGCGTTCAATCTTTCGTCTTTATATACATATGTTACTTTATATATTTATATATTTACGTATACACCCGAATGTATTTATATATTTGTATGCATATGCCCACACGTATATGCTCAAGAGTAAATTCTCCGACCCGTTTAAAAGCA…	ARS1305.2	13	100800	101200	49.33	0.15	1	TTATATATTTA	0	101172
CCCATCCACTTTTGAAAACAGAAATGTTGGTAAGACTTTAGTTAACAAGTCCACTGGTTTGAAGAATGCTTCCGATGCTTTGAAGGGTAGAGTTGTCGAAGTTTGTTTGGCTGACTTGCAAGGTTCTGAAGACCATTCTTTCAGAAAGGTCAAGTTGAGAGTCGATGAAGTTCAAGGTAAGAACTTGTTGACCAACTTCCACGGTATGGACTTCACTACCGACAAATTGAGATCAATGGTCAGAAAATGGCAAACTTTGATCGAAGCTAATGTTACCGTTAAGACTTCCGATGATTACGTTTTGAGAATCTTTGCTATTGCCTTCACCAGAAAGCAAGCTAACCAAGTTAAGAGACACTCTTACGCTCAATCTTCCCACATCAGAGCTATCAGAAAAGT…	ARS1307.1	13	146400	146800	45.78	0.21	1	GATTACGTTTT	0	146873
GCACAATTGCGACTGCTCACGCTTGGACCCTGCTTCCAGATCGACGAAGTGTCCGATGCAGGAGTGCACGAAATTCGTCTGTTTCTTTAAAGTAAGATGGTACAAGTATAGCTCATCATCTTTAGCAACCATTGTTATGTTATGGTCACTCCTTGTTCTTCTTTCAGCCTCTCGTTTTAAACCGTCATAAGCCATCGTTGTGCTAGCTTGCCCAAATAGTTTACGCATCTTCGCCGTGTGGGGCGACAAGCTTACTACTGCCATTTTGCCACCTCCCCACATTTAATGATGGAAAATATTATAAAAAAGCGAGAAAAGAAGCTAATGGTGCCATTGTTTTCCTTTTTAGAGAGGGGCAGCAGAGATCGGTGGACTTTGTTTTGATAGAGGGCGATTGCA…	ARS1308.0	13	178000	178400	29.1	0.19	1	AAAATATTATA	1	178314
GAAGAATTCAATGTTTAGGGATATAAATTCGATATAAAGGTTTAAAGTAAATAAATTTCGTGTATTACTATGCAAGTAATGTTTCTGCCTGCACCGGCTTCGTAGCTGGTGGAGTGCGATAGCGATGATACTACCTGAAAACACAGAGGAAGGCCGTCAGCCCCGCGCTAGGAACGATGAGGAGAAACCAGTTGGCGAATCGCCACATGCCATTTACGTAAAAGATGCTGTGTAACCTAACAGAAATAATCGATGGTGTGAACTAAAGTCCTAGGATGCACATAAGCAAGCGAAAAAGTGAAAACAACATTTCCAGAGCTAAAAAAATGCATTTGCCGATCCGAAATAATCTCAAAACGAAAAAATGATTATGGACGTAAACAAAATTACCGCATTTCG…	ARS1309.4	13	258800	259200	32.74	0.1	3	AAAAAGTGAAA	1	258985
TGGAAATTTCAGTTCTCCCTGGCTCAAGAACATTGTCAGTATTCCTATAACTGAAGCTGAGTGGTACTAATGCACCGAGATGCAAAGTCCGAACCACCCCCACCCCCCTCTTTACCTATTTTTTATATTTTGTGATAAAGGGATAACTCGTCTTGCCTTCACTGCGCTTCGATTCTACTTTAGCTAAACTAAGCGTTACTTTGTTTGAGAATCTCTCAGCCGTTAAATCAACGTACTTGTATACTAAACAGTATATTCACGTGATAACTTTGCCTTACACCTATGATATAGATAAATATATACATATATATGAGTGTGTGTGCATTGCGTCACTAAACTATGTTTAATATGACAGAAGGTTTTCGTTTAATTTTGCCGCTACCCGAAAATTTTGGCAGT…	ARS1309.5	13	263200	263600	32.74	0.1	2	TAAATATATAC	1	263299
ATAAAGCAACAATTGGGGCTGACTTTTTAACAAAAGAGGTGACAGTTGACGGTGATAAAGTTGCCACCATGCAAGTTTGGGATACTGCTGGACAGGAACGTTTCCAATCACTGGGTGTTGCTTTCTATAGAGGTGCAGATTGTTGCGTTTTGGTCTACGATGTGACCAATGCCAGTTCCTTTGAGAATATTAAGTCTTGGCGAGATGAATTTCTAGTGCATGCGAACGTAAACTCACCAGAAACATTTCCATTTGTTATACTGGGAAATAAAATTGATGCCGAAGAATCTAAAAAAATTGTATCAGAAAAGTCCGCTCAGGAGCTTGCTAAATCATTAGGCGATATTCCTTTGTTTTTAACAAGTGCCAAAAACGCCATAAACGTTGATACCGCATTTG…	ARS1309.6	13	267200	267600	32.74	0.1	3	AAAAATTGTAT	1	267573
CGGCCAAACCCAAACGGACCAGCAGTTGGGAAGAACTTGTGAAATAGACGCGAGAAACTTTACACGTTGTTTGGATGAAAACAACGGCAACTTCCAGATATGTGATTATTACTTGCAGCAACTAAAAGCCTGCCAGGAAGCTGCACGTCAATACTAAGTTTAAAAGCTCAAAAATTTAGAAAATATTCACTAAAATCATACATTTCGGTAATGTTCTTGTTTTAACCATGTCATTTGACTTATTTTTTTTTGATGGTTTTTCACAGAATCGCATACTCCACGTGAGAACAAGAAAAAATGAAAGGAATAAGGACTAAATGTCTTATATATATGGATATTTATTTGTTTTATTTTGTATGTAAATAACTTTTATAAATCAAATCATCCAATTTATTGACT…	ARS1309.7	13	272400	272800	32.74	0.1	2	AAAAAATGAAA	1	272797
GACCGAAGACGGCACTAATGACACTTAAGACACCAATAAAAGTGTTAGTGTTTAAGTTAGAATAATTCACCAAAGCATTGCCCGCATTTTTCTTATGAGTGGAAGACCCAGAAGCAGAGGCAGAGGCGGAAGCAGAGGCAGAGGCAGAGGCAGAGGCAGCAGCGGCGGAGGCAGACAAGGAAGCAGAAGAAGAATAATCATCATTTCCTACACCTGAGACTGACCTGCTGTCAATAGTACCGTTCCAGCAGTAGTTGGTAAAACACTGGCTGCATTCAGAGGGCAATGTAGCATTCAAGTTTTGTTGCTTACGTCTGATAATGGCGCAACCAACACAGCCCAAGAAATCAGAATCATCAGTAAAATTACCCATTGTGGCAGCTTCAAACCCATTCTTAA…	ARS1310.0	13	280800	281200	41.78	0.31	1	ATTCAAGTTTT	0	280888
TAATCCAGCATAGCGCTGAATTGCTGAAAGATATGGGTAGCGGTCAGATGAGAAGGGCAATCGTCAGGACTTCTGTTGAAAAGCGGACTAAACATAGGCATTATCATTCTTAGAGTTTTACGAGCAAATAGAATCGAGTGACTTCCGTCGTTGCTAACAGGCGCAGTAATAATAACCGCGGACGAAAGCCACGCAGGCAAAGAATGCTTTCGCTGAAATATCGGAGTCTTGCTATTGTTCAGGCTTTGCCGGTGCGTAAATAATAGGCTGAAGCGAATTTGATTTCCCGCACAAAAAATTTTTGCTCGAGTAAGTCATACATATATCTTGCATGCGTAAAAAAAATTGCAATTGCTGAAGATTGAACGACCGCCCACCGGTATTTTCATCTCTTCTAGA…	ARS1310.1	13	283200	284400	41.78	0.31	4	AAAAAATTTTT	0	283516
TTTTCTCCTCACGGCGCAACCGCTAACTTAAGCTAATCCTTATGAATCCGGAGAAAAGCGGGGTCTTTTAACTCAATAAAATTTTCCGAAATCCTTTTTCCTACGCGTTTTCTTCGGGAACTAGATAGGTGGCTCTTCCACCTGTTTTTCCATCATTTTAGTTTTTCGCAAGCCATGCGTGCCTTTTCGTTTTTGCGATGGCGAAGCAGGGCTGGAAAAATTAACGGTACGCCGCCTAACGATAGTAATAGGCCACGCAACTGGCGTGGACGACAACAATAAGTCGCCCATTTTTTATGTTTTCAAAACCTAGCAACCCCCACCAAACTTGTCATCGTTCCCGGATTCACAAATGATATAAAAAGCGATTACAATTCTACATTCTAACCAGATTTGAGA…	ARS1310.2	13	287600	288000	41.78	0.31	2	TTTTATGTTTT	0	287890
TTCTTGTTCTTCACTTTTACTTTTAAAATTCATATCGTTGTTCTGTGATCCGTTATTCTTTTCCTCGGATGCGATCAACATTTTCCTGTTATTAATTAGATTCTTGAATGACCTTTTATCGGGATTGAATAATAACTCAGAAGCTTTTAATATGCTTTCGTCCAAATTTTCCTCCTGCTGGTTAGAAATCGCAATCTGATTATTCTTTTTATCAATGGAAATCGACAACTTTGGATCAACCTTGATCTGGGCCTTATCCATGACGGAATTATTAGTCTTGAGCTTGGCTGTAAATAAAGTTTTAGGAATCATTTTGTATGCGTTCGTCAAACTGGCTTTTTTGCGTTCATCGGCTTTGATCTTTGTAGCGCTTGGTTGAATTGGATAGGAAACCGTGTT…	ARS1312.0	13	364000	364400	27.32	0.09	2	AATAAAGTTTT	0	364325
GGCTGTGTTGTTGCGCTGGGGAATGCGCCACGGCTAACTCCAAACATAATAATGTTTTAAAAAAGAAATCTTCGAAGCTGAATGGTGCCTCTCAGTTGCCGGGATCTCTATGCAATGCTGATAGTTTCCTTTGCGACCTTATGACACTTTATTAACTCTAAGTATAATTTAGTTTTGTTCTTTTTCTAATGAGCATGGTAAGGAAAAATGCCGGGTAATGATAATCTGCAAAAGTGACAATAATAAACTGACGCGTAACAAGATCAATGATATACTGGATTAAAATGCCATGAAAACGTGAACAGAAACTTTTATTGAGGTCATGGATCAAGATTTTGACAGTTTATTACTAGGTTTCAATGACTCCGATAGTGTCCAAAAAGACCCAACTGTACCAAA…	ARS1312.2	13	366800	367200	27.32	0.09	2	AAAACGTGAAC	1	366948
GATTCCTTTTCTTCAACGGCAGACTCGTATTCGTCATCATCCTCGTCACTCTCACTTGCTTCCGCATCGATCAAACCGTCAACGGATAAAAGCTTGTCCTCATCTTCCTCGACATCAGATTCTTCGCTAGCTGCTCTCTTTTTCGACATCTTTGCCTCGGTAGTTTTGTTGTTCTTAGCCATCATTGACCTAGTTATGTTAGAACAGATTTAATACAGTACCTTTCTTCGCTAGGATCTATATGCGAATATATCACATATGTAAATTATAAGCTCATCGCAAAACCAAAAAAAAAAAAATTTTCAATAATTTTTCACTAATCTTCAAAAACAAATGGGGTAACCCGTACAAGAGTTATTAAAACCCAAAATGACAAAATCGCGACAATTCAATCCTACT…	ARS1312.3	13	370400	370800	27.32	0.09	5	AAAAAAATTTT	0	370622
ACCCTCAATGCCAGATATGTTAAACGCTTTTTTCTGGAGTGAGGTATCATAGAAAAAGGCTCGAGTACATCAAGCACTTAAAGGTTCAACACTCTACTGTTACTTCTTTAAGCTAAGCTATTCATACATAATAGTCCATCAAAGTGGCTCAAATTGCGCATACAGTGTAAAAATGCGTTCAGGGAATAACGATGTCAAGCAGCGTGTGAAAATTGGACACGTTGAATAATAAACTTCCTGGAAACCGTCGCGCGCCACTGCTGTCAGAAAATAGTAGACTACTTAATTTTCAATTCATATTTAGCCTGCTTTTTGATCTATGAAATCGCCCACTCTAAATCAGCGGTGTTTTTGCACGGTTTGTAATTTTAACTTCATTATATGTATTATTCGGTGACT…	ARS1312.4	13	371600	372800	27.32	0.09	5	ATTCATATTTA	0	371648
AATTTCGTTGTCACGTTGTTTTGGTAAGTTCCTTCGCTTTCTCGTAAAAATAAGTAAAAATCCGGGGAAACTATTATTTGCGGTTCGAAATAAAAGCATTTTAATTTCCTTCCTTGGCACATTTCTTGGCCACGGATGACCTAAAACATTGCCAAATAAAAAGGGGTAAGAGAACTTTTGTCTTATAGTTATTTCAGCGATAGTCATTCTTCCAGTTTCTGTTTTGTAGGACAAGGGGATTGCTGCTTAGATAATCAGTGCCGCAAGAAATCTCAGATGTGGGGCCAAAGGTAAAAAATAAAAAATAAAACTGAAAGATAAAAAATAAAAAAAAGATCGTCTCACGTACATCGTATCTGCTCGAGTGAAATCACTGTATGGTAAAAATGTATTATGCAT…	ARS1315.0	13	432000	432400	52.16	0.12	5	AAAAAATAAAA	1	432208
CATTTCGGCAGCGTCATCAAATGTACGCACCCACTTCAAGTGATCATTCGCTCGTTACTACCTATCACGTGTCGCATCACTCGCGACGTCCATGCGCATGCTGTGCCGCAGGAGAATTCGAGATGCGAATGAGCAGCAGCCATTTTGATGTTGTGAGCATCGGAACGTTTCTGCGTCCGTACACTGTCCTTTTGTTACTTAGATAATGGCTAAGGCAAGCAGTCCGGGCCACAGGAGTCAAAGGCTTTTCGCCAGCTCCTAAACGCTGGAAGTGTAATTTTTTTTCGTCTTATAAAATTAAACAAACCCTTTTAGAAAGGAACACTCGCTTTATCTCTTCGACCGAATTTACTATACATGGATATATATATATTATCTTCTGTTCACAGTTAAAACTAG…	ARS1315.1	13	434400	434800	52.16	0.12	1	TAAAATTAAAC	1	434649
GCAATTGGTGTCACTGCCACATCTTTTAACGTCAACAGTAAATCCGCAAAATCCCGTCGCGTCGCCGCTAAGCAGGCCCAATTTTAGCTCACTGCGGCAGCGGGCTGGCCGTGTGGCGCGAGGGTCAACATGCAAAAAAGGACGATAGATAACCTTAAAGGAAGTATTCATTTCTTCGCTAAATTTTCAGTGCTCCCTTACTTTACCGACAAATTGGATAAAAACATATAAAACACAACAGCAACACGTAGCCATACCAACCAATTCCACAAATCACCAGCCGTTCGTTCCTAAAAATGTTTAGAAGAAGAACAACTGCACCAGAAATGGAACAGGCGGACCCGACAGCAGTGGCAGCTGCAGCAAGTATCGGTAAATTATTAATGAAGAAGGGTAATC…	ARS1315.4	13	439200	439600	52.16	0.12	3	AAAAATGTTTA	0	439201
GCTGCAGGTGGTGTAGCAACGCCAGCCGATGCCGCATTGTTAATGCAGTTGGGTTGTGATGGTGTGTTTGTTGGCTCAGGAATTTTTAAATCATCTAATCCTGTAAGGTTGGCCACTGCAGTAGTAGAGGCTACCACTCACTTTGACAATCCCAGCAAATTGTTGGAAGTATCTAGTGACTTAGGAGAGTTAATGGGTGGTGTATCAATCGAATCTATTAGTCATGCTTCCAATGGAGTAAGACTTTCCGAAATTGGGTGGTGATTTCTTTGAACAGGTATTTTGAGCATTATAACACTTTTTCCCCCCTCAACTTTGTATTACTCGGTACACATTGTAAAATGATCTAATTATTAGATAAGCTTATGTATGCTGGATATTATTTACTAGAATACTTGA…	ARS1316.0	13	459200	459600	56.61	0.02	1	TAACACTTTTT	0	459327
TTCTAGTTTGAGTAACACGCGCTTTCTTATAACAGAGGGCATATCTGCTCTAAACACACGAATAGTCCCTACGTTATCAGTACTGATCAATATCGTTCCAATTGCGTCAACGACATCTGGGATAGCACTGGTGGCGGAAGCATTAGAAATTGAGCCTGGTTTAGAATTGTAGCCCAAAGACGACTCTACATCTGACATTATGCCATCGTCGTTACTCCGACTCAAAACATCGAAACTATCGGATGTCTGAAAAAACTCTAGAGATAGCTCGCAGATAACATCGTTAGACAAAGATAATGTTTTCGAAGTTTCTGGCGGTGCAATGCTAACACAAGTAACAGGGGCATTGTGTGCATGAAAAGAAATGTAATCCGTATTTTTGATATAATGATCGTTGCT…	ARS1316.2	13	470400	470800	56.61	0.02	1	GATAATGTTTT	0	470551
ATCGGCTGGGAAGGCGGAATTAACAACACCCGATTTGGTAACATATGCTCTCAATTGATCGACAATCTTGTTAGCTTTTTCTGTTTCAACTTTTTCAAAATCATAACGAGTGAAGAAAGTACGGCCGTACTTTGCCCAGAATTCATTCTGTATCGTCTTAATAGAAGCTTCGTTCTCCGGATGATGCTTGTTGTAAATGGCCAAGATGTTCAACCACGCCATAATGGCCCAAACACCGTCCTTTTCCCTTACGTGGTTGGAACCAGTACCAAACGATTCTTCACCACAAATAGATAATTTTTTAGCGTCGAACAAAGCACAGAAAAATTTCCAGCCAGTTGGGACCTCATAACAGTTTAGACCATGGGCCTTGGCAACACGGTCTATGGCTCCTGAGGT…	ARS1316.5	13	476400	476800	56.61	0.02	1	GATAATTTTTT	0	476483
TAAGTTGGGCCTCTCCCCCCTAGAAAGAACAAGTTGGCCCTGTTGTCCTTAGCTCGCAAGCTCAGGGGCAGCAGCGTGTGTTGAGATTAGAGAACCGCTCGACCTCAACGGATGATAGTATGATTTTAGTACATACAGGGAACGTCCTCTACCCACGTTTTATTGTTGTTGCATTTACTTTTGAACAGCGACAGGGGGGAAGGTGTAAAGGAGGAAAAGCAACCTGCATGGCTAGTGTTCAAAGTTACAAGGTAACAATGCAAATCAGTAGTATGACAATTATTTACCCGCTATTTATTTTTTTTTCTCTTTAACTGTGGTGACGAAAACATAACTCAAAGGATGTTAGACCTTTTTTAATTATTGCTATTGTTTGGACTTCCCCTACTGTGTTGTTCA…	ARS1316.6	13	478000	478400	56.61	0.02	1	ATTTATTTTTT	0	478234
CATCGCCATCTGGCTCCTGGCAGGGCGGTTGATGGACATCAGCCGCCTCCCTTAATTGCTAAAGCCTCCACAAGGCACAATTAAGCAATATTTCGGGAAAGTACACCAGTCAGTTTGCGCTTTTATGACTGGGTTCTAAGGTACTAGATGTGAAGTAGTGGTGACAGAATCAGGGAGATAAGAGGGAGCAGGGTGGGGTAATGATGTGCGATAACAATCTTGCTTGGCTAATCACCCCCATATCTTGTAGTGAGTATATAAATAGGAGCCTCCCTTCCTATTGCAACTCCATAAAATTTTTTTTTGTAGCCACTTCTGTAACAAGATAAATAAAACCAACTAATCGAGATATCAAATATGGGTAGTTTTTGGGACGCATTCGCAGTATACGACAAGAAA…	ARS1316.7	13	482800	483200	56.61	0.02	4	AAAATTTTTTT	1	482946
CTCTCGGGAAACTTCTGGATGGCTCTAAGGAAGGTTGGGTGCCAACAGCTTACATGAAACCACATTCCGGAAATAATAATATCCCTACTCCTCCTCAAAACAGGGATGTTCCTAAACCCGTTCTGAATTCTGTACAACATGATAACACCTCTGCAAACGTTATTCCAGCTGCAGCCCAAGCAAGTTTGGGTGATGGTTTGGCGAATGCGCTTGCTGCTAGGGCCAATAAAATGAGATTAGAGAGTGATGACGAGGAGGCTAACGAAGATGAAGAGGAAGATGATTGGTAATCAAAATGTATTTAGCGAGTATATACTCTATACGAGCAAATAGAGTAAATTGTAATTAATAAATATTGATATATTATCGCCCATATGAAATTTTTAAACGAAAGGTTAC…	ARS1319.0	13	490000	490400	44.81	0.02	1	AAAATGTATTT	1	490246
ACTACTAGAGCATTTAGGCAATCCGCAAAACTCACTTAGAGTGCTGCACATTGCAGGGACAAATGGTAAAGGTTCAGTATGTACTTACCTATCTTCTGTGTTGCAACAAAAGTCCTACCAAATTGGAAAATTTACCACTCCACACTTGGTGCATGTTACTGATTCCATTACAATCAACAATAAGCCGATTCCGTTAGAGAGATACCAGAATATTAGATTACAACTAGAAGCTTTAAACAAGTCACACTCTTTAAAATGTACGGAATTCGAGCTATTAACATGTACCGCATTCAAATATTTTTATGATGTGCAGTGCCAATGGTGTGTCATAGAAGTAGGCCTTGGCGGAAGACTTGATGCGACCAATGTTATTCCAGGCGCAAATAAGGCATGTTGTGG…	ARS1319.2	13	495200	495600	44.81	0.02	1	AAATATTTTTA	0	495323
GAGAGATCGGTCTTTTTTTCCTTTGAGATACTAAGAGCTCCTCTTCCTTGTTGCTTGACCAAAGATCAGATTTGGATACGCGGCCATTGTGGAATTCTTTGGAAAAAAGGTCCATTCTGCCATTAGAGATATAATTATGCAAAATAAATGGTGTGCTGATTCTTGGCACGAATACAGATGCTCGGGGAACTCCAAATACAGATGTTACTCTTTGAATGGTTGCTTTCATTATTCTTACGCTTCTGAATATTTCTGAGCTCCACTTATCAGCTATCACAGTCGCATTGAGTGTGATTAATTTTTCGGTATATTGATACTATTTCATTTTTATTTGCCATTATCTAAAATCTTCGTCAATTTTTTTATGAGCAACGTATCCCTAATCCCTTTTTTACAAAA…	ARS1319.5	13	502400	502800	44.81	0.02	2	GATTAATTTTT	0	502795
ATCCCTGCGAGCCACCGTAATGATGCAAATTGCAGTAAAGCAGCGCTTAGCCTCCAGCCGAAATTTACTTCCGTCGAATGCACGTTGGCCAGAATGTCTCTCGTCCCCCTTGTGCTGCGCAAATAACAACGCGTTGGTGCGTTCTGGAACGCGAAGATTGCGAAACACGCCTCCGAACTGACGTAGCATAGAGTCTTTCACAGTATTGCCTAATGCGGAAATCACATTGCCATATTGGTGAAAAATACAATGGCTAGTTTGATCTATTTTTGGGTTATGGTGTCTCGAGCGTAAAAAGTGAAAAAAAAGTATATAAACGATCTGAATTTAAGGCAGAATTCTGTTTGCCGCTCTCAGAATGTACTGTTAATTACTGAGGTCTCCATCAAACACAAACCC…	ARS1319.9	13	510400	511600	44.81	0.02	2	AAAAAGTGAAA	1	511176
CTTATTGATGAGAGAGATTCAGAAATTGAAATGCTTAAAGGACGTTTACAGTAGATGAATGATGTATTTTATTGTATATATCGCTTAGTGCACCAAAATCATACTACGTAAGTATAAAATCACTTTACACGTAGAAGATGCTTTTTCAGATTGTTCTTGAAAAAGTTGAAAAAAATATAATTCACACTCAGCAACAGGTGAAAGTGTATAATGGGTAAAAAAGGAAGGACAGAAGGTATATTGCTAATCAAAACGACTTTGGTATACGCGTTTGGGGCTACAATTGCATTTTAAATATATTTAAGATGTTTAATAGAAAAAGAAGAGGAGGTATGTTTTAAAACCAATGTTTTCCAGAAGTTTCGTTCTAGAGTGTGTATATCAAGACCAATTAGGATG…	ARS1319.11	13	517600	518000	44.81	0.02	2	AAATATATTTA	0	517523
CATTTTTCAAGCGTGGTTTCACATTCTTTTTGCACCGCCCTTATCTCAGATATAGTTTCGTTCGGTTGCTTTGCTTTCCCCAACTGAAGGTGCTGGATGGCGGTTTTTCCGGCTGCTGCGATTTTCCCTGCGCGGGGCCCGGCGCGGAATTGTGCAAAAGCTAAAACTCAACGGTTATTTTGAAATATAAGGTTATAAGCAAATTTCCTAAATTTGCTTAATTGTTAATGCAGTTGTTATTGCATTAAGACATTCGGCTATCGTTTCCTTTCTTCGTGTCGGCAATCTTGTATAAAAGTTATTTTTTGAGTTTCAGTTTCTTGTATATCTTGGTATATATTGAAGGAGGATTTTTTCTTTCCTGGTCCTTTTACTTCCTTGCGTCCCCTCATATTTCTT…	ARS1320.0	13	540800	541200	50.47	0.4	1	TAAAAGTTATT	1	540944
CGCCACTTTTTGCAAAATGACTTTCTTGTCCTCTAGCAAATTTCTTGCTGCATGGAACGATCTATTTTTGGCATATTTCACAAGCCCCGACTTGCTCTGTAGGCTAAACCTGGAGGAGTTAGCCCACACTGTTTTCATTAATGATTGTCTAATCATTATTATTGGTTAATTTTTTATTTGCTCTAATAAGTCAATATTATGATGCTATATGAAGAATATTAGTGTGAAAATTTTTTTCCTTTTTCTCTCTTTAATTGGTTTACCAGAATATATAATAAAAGATAGTAGCTGCGTATAAATTTAGTCTAAATACTAAACATGCAAAAGAAATAATGAAGATAAAAACAATCGACACACTTATAGTTCTAGCCCCAACAGCACAAAAGCGGAAAAAATCAA…	ARS1322.4	13	556400	557600	51.97	0.03	5	GTATAAATTTA	0	556609
CTCATTTATGTCCGAGCTGACGCCTTCTTGAAAAAAGTCCTCGACAAAATGGCCCTACAAACACAGCCGGCACAACTACAGGAACCACAGGAGCCACTTTCCACATTAAGGCCAGTATCTAATCCAACTATTCCAAGCCCATTAAGACAAACGGCGCGCCCTTCTAAATTCGTCACCGAAGAAGATGTTATTTTCGAACCTGTTAGTGCTCAAAGCGCCATTGCCCGTTCATTAGAGACTACTGCTAATAAAGCGGGTAATAAGTTCCAGCTCTCTTAACCTCGGCAATAAAAAAACATTTTTCGCAAGTTTAGCAGGTCAATAATAATAATATCCTTATAAATTACACTCAGTTTTTTATTACATATGGGCCTTTAGTATATACATACGCATATATCT…	ARS1322.6	13	560800	561200	51.97	0.03	2	AAAACATTTTT	1	560823
TTTAAGATTTTTTATAATTATTAACCAATGACAATATAGATAACTTGAAACAACTCTTGAAAATTTTGTAGTTAGGCACCAGTCCTTTGGTTTTTCAATGTTCTATAAAAAATCACTCCTCCATGCAGCAGTAAAGCGCTATTCTCAAAAATAGCTCAACCTGAGAGAGGAAGAAAGAGCAGTAGTAAATAGAGCAAGGTTCTTAAAGCCTGTATCAATGAAATTTTGTTATGGCGTTTATATGGATAACCTGGAATTTGCCTTTTTTCTTTATAGCGCACCGTTCCGAAGAAAAAAATAAAAAAAAAGGGCCGACGGAGGGTTAGGTCAAATTAAATATTGAGCTAGGTTTAGTTATCTCTTTTTTAGGTTTTTTATATACAAAAAAGATTATATTTA…	ARS1323.0	13	605600	606000	46.79	0.06	2	AAAAAATAAAA	1	605849
GCGCGCCCAAGCACAAACAATGCCCAAAATAAGCTTGCTATCGAATTGCTAAATTCGATATCAGCCGTTAGTAGTGCTTACTTGCAGAAAATGCAGAATAATGGCTCTGGTAGACAGCATACTGCTGATTTATGTACAGGAGATTCCAACACCCATTCTGGTATCAACCAGCATCGGACTACGAATGGAACCATAGATGTGAATACGAATACTGCACAGCTAAACAACCAATTTTCTAACGCACTAAATACTATCTTACCTGATCAGCAGCATAATCGAAATAATGTTTCCCAAAATATAAACCAATCGCTCCCTAACCGACAACTTGGTCCTGTTATAAACACACAAGCCAATCAGAACCAGTCGCAGGTTTTAATTCATAACACAAATACACATCAG…	ARS1323.1	13	606800	607200	46.79	0.06	1	AAAATATAAAC	1	606936
CGTACAAAGCGGTTTCCGGTGCTGGCCTGGCCCACCACAGTTTTGGCGTGGTTGATTTTAAAAACCTTCGGGAAGGTGAAAAAACCACTCCGAAGGTTCGAGGATGACAAATCGCCCCTTAGCTGTGGCCATACAAGCTTGGCACCGACGAAAAAGGGAAAAAGGAAAAGAATGTCGTACAAGAACTCTTACAACCACGTTGAGATTTCATTTAACAACGCCCCCCTTTCCATTATATAAGAAGGCATTAATTTTTATGTAATAAAAAAAGAATTTCTCGAAAATGTCTTACAATTAATTTTTTCTTTTGTAGAGTAGGGCTTTAATAGACTGATATATACGGTATTATAAGTGAACGAAAAAAACAGCAATGGGTTTATTTGATAAAGTGAAGCAATT…	ARS1323.2	13	608400	608800	46.79	0.06	3	AATTAATTTTT	0	608608
CAACAACGATTCGTATGGTTCTAACAACGATGATTCCTACGGTTCTTCTAACAAAAAGAAGAGTTCTTATGGTTCCAACAACGATGATTCATACGGCTCCAGCAACAACAATGACTCTTACGGTTCCAACAATGACGACTCTTACGGTTCCTCTAATAGAAACAAGAACTCCTATGGGTCTTCCAACTACGGTTCATCCAACAATGATGACTCTTATGGTTCATCTAATAGAGGCGGTCGTAATCAATACGGTGGTGACGACGATTACTAAGTTTTTGGATGTCTTCGATAAAAAAAATATATTATTGTGTTTAGACTTAAGTATGAAAATTTTATGTATGAGCTGTGGCTATGTATCCGCTGGCAAATAGGTCTGCTTTTTCTACACTTTCCACCCTC…	ARS1323.3	13	609600	610000	46.79	0.06	2	AAAAAATATAT	1	610000
CACCAGGAAACAACTCGTCCAATGAAAAGTTTGCCATTAAGAATATTCTAGACCAGTGGAATTTAGACAACATTCCTCTCAATGAACTATCGCTTTTACAACACCTTGATCTGGATATGGCCAATTTTACGAGAACCACTTATGATATTGGAATGTTGTTTTCTTGTCAAGGTTGGTCTGTTTCGGATCATTTTTTACCTTCAATTGATTTCAATCATTTAGGTTCTACCAAGTTGGTGTACAGTATTGCGCCGAAAGATATGGAAAAATTCGAAGCTTTAATTGCTCGAGGAAAAAGTGAATGGGATACTATCCAATCAAGGCCGCGCTACTCCACCTCCGATGACGAATTAAAGAGCTTTATAGAAACAGATTTCTACAAGTCATTTTTGGATGCAG…	ARS1323.5	13	613200	613600	46.79	0.06	3	AAAAAGTGAAT	1	613416
CCCAATACGTGATCAATCTGGTAATCTCAATGTTTGTTTGCACTCATACTTTGATAGCGCAAGCCTAGGAATTGCTCTCGATGGCTTGGACAAGCCTCCGACTTCTTATCTGCTTGTTCACAATGAAGATTTTGAAAAAAAGTGGGACGTGTTAATGACTTCTACTTTTAGAAATAGAACTGTGCCATTAAATATAATACAGTATTTGATCTCTCATACTGATAGTAATACTGAGTTTAATCGAATGTTACGCTCCAATTTTGATGATTCATTACTACTTATTGAGAAATGTAAAAAGTTTATTAAGACCTTCGTGGATGTTTCCTGTTCTGTTAAAGATGTAGATTTCGGAAACGGTTTCAATTTACGTCATCTACCGCTTAAGTTTTCTGACAACAT…	ARS1323.6	13	614400	614800	46.79	0.06	3	AAAAAGTTTAT	1	614446
AGATATGCAAGCTTCTGAATTTCGAGGCAACATTAGCGTCAGCTTTCTTTGCGCCAACATTTTCATGAGAATTTCTACTATTGGAAGGAGTCTCGGGTTGGTCAGACATATCTTAAACTTCCTATAGTGTTTTCATTTTTCCTTTTCAGTGCTTTTTTTTTCTTTCCCATTTTGCTGGTAGTCAACAAAGTTGTCTTAAGGAAAAAAAAATAAAGAAAATATTGAAAACTAATAAGTTTTTTTCCTGTAAAAGTGTATAAAATATATAGGAGATCCCGTCAAATAATAGAAAAAAAATTTTTTGCCACATATACCTGTAGCCCCAGGAATACTGAAAAAATGGAGTAAAATGAAATGAACAATTCGTCGTGAAGAATACAAAGAAATATTAAAGAAATT…	ARS1324.0	13	623200	623600	43.59	0.03	7	AAAAATTTTTT	1	623394
GATTTACTTTTTGAAAACTAGTTTTTGGAATAATAATGTTGTAAAATTTCCCTTTTTCCACCCCGATTTGTATTTTATTTTTCGTTACAAAATTGGGACTAATATTAAGGGCGACAGTTTTTCTTAAAAGTAAGATTTTTTACTTAAAAATTCTTGTTCTTAACGAAATTACATACGTATTAAAATTATTTATTAGATAGTCGGTATTGTCTTTTTGTGAAAAAAAAAAATTATAATACTAATTGTTAAAAAGGCAGGTATGAGGAGGGTATAGTAGGAAAGAGAAAAGACGTTACAATTTTTAGGTTTTCGGTTTTAATAGAAATTGTTTGATTACACATAATAGGAATTGGGGGGCTGGCGGGAGGGAGGCGCATGTGCTCTATTACTTTCTTGTTT…	ARS1324.2	13	626800	627200	43.59	0.03	4	TTACAATTTTT	0	626825
CATAAGGATTAGCGTTGCTCATTGCTGCAATATTTGTGCGTGTATGGGCAGTTTTCAAATGTAAAGTATTACAATTCCACACTATTCCAGCTCTCTTATGGGTATATTAAACGATTTAACCTGCCAACAGCATTTATTTGTCATTTTACTTGCTTTTTTCATCCATCCATTGAAACTAAAAACGTCAAAAAAGGCCATTTCGTAAACAACGGCCGGGTGATAAGCACGTCGTTTAGGGGGGACCCTTTGCTGCCGCTTGGTACCCGGCTCGTAAGACATAAAGATGCCACATATTTACTTTTAGCTGGCTTCTTTATTCACACAGGCTACTCATAAGAGCTTCAGTAGACGCGCATCTGTCGGTTCTTCGTCAATCTATTTCCGCACATACTATTACGT…	ARS1324.3	13	628000	628400	43.59	0.03	1	ATTTACTTTTA	0	628076
TTGTGTATTTGGAATATTGCAATTAGAACAACCACAAAATCATTTGAAGGACAAGGATGATTCTTTTTTGATGAGAAGAAGTGCCGTACACTTGATACATGATTTGTTGTACAGTACAGGATTTGATTTACTTCCCTTTGAGTACAACTACGATAAGCTAAAAACACTATTATCTTACGTTCGTGATCAAGATGAAGATTACATGGTTTGTGAACAGATTGACAAGCTTTTAACCGTACTAGATAGTTTATAACCCATTACGCATTTGATTATAATTTGCTTCTTAGGCAAAATTAATATTTACGTTCTTTTATATTCTTTCTTTTTGTATTCATAGAACAGCAGCCATTACCAATAGAAAGTTAAAATAGCCGCCGATGCATTTTATTACCCGCCTTT…	ARS1324.4	13	631600	632000	43.59	0.03	1	ATTAATATTTA	0	632007
TTGAAAAAGAGAGTTGATGAGGGTGGTGCACAAGATAAGACCGTCAAAGATTTGACTAACTTATTATTCGAGACCGCTTTGTTGACTTCTGGTTTCAGTTTGGAAGAACCAACTTCTTTTGCATCAAGAATAAATAGATTGATTTCTTTAGGTTTGAACATTGATGAGGATGAAGAAACAGAAACCGCTCCAGAAGCTTCTACCGAAGCTCCAGTTGAAGAGGTTCCAGCTGACACCGAGATGGAAGAAGTTGATTAATCTCTTTTTTCGCCTTCATGTTTTATATATTATATAAATTTGTTTACTTATTTTTACTATTTGTAATAATGATTCTGCTTTACGCGCCTTTAAAAAAGTTGGTCTTAATGTAAACATGAACCATAGCACACAATTTAAGAC…	ARS1324.5	13	633600	634800	43.59	0.03	3	TAAATTTGTTT	1	634504
TCGAGCTACTGTGTTTATCACGGTCCTAAGGGCCTACAGAATATTTCCAGGAGGATATTTAGCTTAACATCAATATTGGCAAATGCCATCGAAAATGACAGTTGCCCTCACGAACTAATTAATAAAACATGGTTTGATACTTTGACTATAAAGTTAGGTAATGGCATATCCTCCGAGCAGTTATTGGACAAGGCCTTGAAAGAATTTAATATCAATTTGTTTGCCGTGGACACCACCACTATTTCCTTGGCTCTTGATGAAACAACTACAAAAGCTGATGTTGAAAATCTACTAAAAGTGTTTGACATTGAAAATTCTTCGCAGTTTCTTTCTGAGGACTATTCTAACAGTTTCCCAAGGGAATTTCAGCGTACTGATGAAATATTGAGGAACGAAGTC…	ARS1324.6	13	638800	639200	43.59	0.03	1	TAAAAGTGTTT	1	639019
CTTACCCATTACCCTTTTTGAGATACAATAAATTCTGGCCTACTGTCGCTAGACTGGATGACACTTATGGTGACATGAATTTAATATGTACATGCCCTTCTGTAGAAGAAATTGCGAACGAAACTGAATGAGTACATACCCATTATGTTGTATATGTATATTAGTTGACGCATTTATGCACATATGTAGATAATATAAAATATTCAGGTCAAAGAAAAGTTAAAAGTTTACGAGAGAAAATTCGAAGTTGATAACTGAGCAATGTGCACACCACAATATGTCGTGGTTGATTTAAAATTTTATGATTCGCCTTTTTATTTATATGCTATGTTATTGTGTATGCAATTAGTATAAGAGGTAAAGAAGCTAAAAAAGTGCCCAAAAAGAATGCTTGGCGAA…	ARS1324.8	13	640800	642000	43.59	0.03	3	TAAAATTTTAT	1	640763
TCAGTTTGAGCCATGGGAATTTTTCCCACCAATATAATCGCAATATTTTTGTCACTTGGTGGAAGAGCCTATTTGAGGCTTCTACAGCTTTTAGGAGGGCAAGTGGTTTAACGGTATCTCCTCTCACGAGGAGAGGAATCGCAAGGTTTGACCATTTCAGACCTGTTCCCAATGTCAGTAAATTTGCTTCTTTTCCCAGAGTGCCCAAAGGAGCCCCAAGGGGCCTTTTTACCAACTGGAATATGACTACATCAAAGAGATTATTAGGGCAGAGAGCTTATTCGACTTCCAGTATCAAATTTACCCAAGAAGCCGTGAATAACATGACTATATCTTTGAGGTGTTTTTTCAACTCACTAGGCGGATTAAATCAGTGCTCCCACTCTAATTCCTGCAAAG…	ARS1325.0	13	645600	646000	45.72	0.12	1	TATCAAATTTA	0	646036
TAGCAGGAAATAAAAATGATCAAGCCCCCCTTGACCGACCACAGTTACCTCCGAGGCAGGTAGTTAATGCGGAAACTCTTCATTTGAAGGCGCCCCATGGTAATGCGACTCCCTCCAAATCACCAACGAGTGCTGTAGGTAATTCTTCTTCATCGACCCCTCCAACCTTACCACCACGCCGTATAGAAGATCCTTTAGACTTGGCTGCTCAAAAACATTTCCTAGCGAGTACATTTAAGAGAAATATGCTCTTTTATAAAAGTGAAGATAACTCTATCAAATGTGATTTGGATAAAAATATACTAAATTTAAAAGAAGATTCAAAAAAAATTAACAACAATGAAATTCCTGAAGAGGTTAGTTCATTTTGGTTAAAGGTTATCGGCGACTATCAAAATA…	ARS1325.1	13	647600	648000	45.72	0.12	4	TAAAAATATAC	1	647852
AATTCAAGAATTTTAATTACATCGTGACAACGGTTTCCTAAACTTTTAGTAAAAACAATTAAATGTGCAATTTTGTTGATTATACTGTGGACAAATTGAGCTTAGTACGTTTCCTTCTTCTCTTTCTGCAATTATATTTAATTAAATAATCTCGTATTCTCGCATCCGGGCACGCTTTGTGAAATTCATTTGAGAAACCAAAAACAGCTGATCAGCTAGAGCTATTAGAAGTTAGTGCCCAGGGGTATAGAAAAATCAGTTTAAGGAAGAAAAAGCTCACAGAAGAATATGCAAAAAATTTTCAGACCATTCCAATTAACGAGAGGCTTTACCTCTTCCGTAAAAAACTTCAGGCAATGGAGACTGATTGAAACAAGGAAGATTGCCAAACAACCGAAC…	ARS1325.2	13	650000	651200	45.72	0.12	3	AAAAAATTTTC	1	650037
GAAACGTGGGCATGACGTGGAAGCGATGATCCGAGCGCTTCTGCTACTGTGGTGACCACCGTACCAAAGGAGGGGTAATAAGACCCTGTGCCCTTTGCCAGCATACGTGTTACCCCCCTCAAAAAGAGCTGGCTGTTCGAGCTAGCTGCTCTTTCTGTTGCCATTCCCGTACCAAGAGCGCCCCGTAGCTCGATTTTCAGCACCTTGGTGGATATCAGGGGAATTTTACCGCCGCAAGCGATCAGCGTAGAGTGCGCACAGAAAACAGACAGAAATGACTGAAGCGGATGAAAAAAAATTTTCTGGCGCGGCCCAATCTCCGCGGAAGAGTCATTCCGTGAAATGAAAACAAAAGACGCGCATAGTAGGAGAAAGATTATGCAGCTTGATAGCGGGTTA…	ARS1325.3	13	653600	654000	45.72	0.12	2	AAAAAATTTTC	1	653637
GGTAAGGTACTTCAAAAATGATAGTGACAGAGAAGAATTGAAAAATGAACTTTCCGATTACGCCTCAGCGTACGAATCTGGGTGGTATGAAGACGAAGATTCTGGTGATGACGATATGTGATAAGCAGTTTGCAGCTACGTATTTCCTTTCTCCAGTTGAGGCAAACAGGACTTCTTCCATCTTTTTCGAAGTTTTTACTTCGCCATTTGATCTATATCTACGTAAATTACATTAATTAGAAAGTCATGCTATATCACTCTTGCCCTTGAAAGCATCCACAGCTGTCCGTCAAAAACTTAATTTCTCAAGTGGAGGAGAAAATTTTACCTCTTGAACTTAAAGAATGTAAATCTTCATTTGCGTCTTTAAAGTCATCGTTTTGATTTTCACCAGTTGCT…	ARS1326.6	13	690400	690800	50.97	0.02	1	AAAACTTAATT	1	690679
CTTCCTTGGTAAACAAAGTTCTAGTTTGCATTTTGTACTCAGTTTGTGACTTGTAGTCATTGAGTTTTAAAAAGTTAGCTGCTTGTAAATGGTACGAATAATAGGTATACTCAGGCTCAGAAACGTTCTCTAGAAAATAATTCAAACCGGATAATAGTGCCATTTTTCCATACTTGTCAAAGATCTCTTCCATCATTTCTTTTTGCACACCATGTGAATCCAGTTCACGTAATAATGAGTACAGTTTTGAAAAGAGAATGCTGCTTGGAACCTCAGTTTCAACAATGTTAAATAAACATATAATGTGGTTTTTCATGTAATGCGCCAAGTCGATGAATAATTCCAAACTGATACTTGGCTGCGTAATATGTTCAACGAGGAAATCAATATCTTCCACAA…	ARS1326.7	13	691600	692000	50.97	0.02	2	TAAACATATAA	1	691730
TCCGCAAAGCATTATTGTTTCTTTTTTTTGATTTCTTCTTATTTCTTATTTCTTATTCTTTTTCTTATTCTTTTTCTTATTCTTTTTCTTATTCTTTTTCTTTTTCTTTTTCTTTTTCTACATCATCTTACTTAGCTACTCAGTCGATTTCATGGGCGATGTATCGGTGAATAAGAGAACGATATTTAATTTCTTTTTAGCTAGTTCTCTTTTTTTCACCTATAAAAATGCAACTACTTTCATATCATTTCCTTTCCCTCAAACAGGTGAGATAAAGATAGGACTCTTCTACTAAACATATATATTACTGAACGTCCCAATCGAATATCGAGAGAAAATGGTACTTTGCAAATTACTGACACCATATTTCTTACTGTCAATTTTGAGTGTCGGCGTGTT…	ARS1327.0	13	757200	758400	50.39	0.13	2	TAAACATATAT	1	757202
AGCAATAACAAAGCTGAATTCAAAAGGCAGTCATCGCCATTCAGAGAAATCATCTCTGCGGATCACCCAATTTATAAACCTGCTAAGGGAAGGTACTGGCTGTATGTGGCGCTACCATGCCCATGGGCACAAAGAACCTTGATCACCAGGGCCCTGAAAGGGCTAGCGCCTATAATCGGGTGCAGTGTAGCGCATTGGCACCTGGATGACAAAGGCTGGCGATTCCTTGAAGAAGGAGATGGGAAAACCAATGAAAGGCACTGGTTTGACATTGCAGGCGGAATTAGCTCAGTAAATTTAAATACCAGTACTCCTGTGGCTAACATACCCAATAACGCGCATCGGTTGTTGGTCGACGGAACAGATGAACCGCATTACGGGTACAAGAGACTAAGCGAC…	ARS1328.0	13	773200	773600	62	0.04	1	TAAATTTAAAT	1	773222
TGCTTTCTGTACTTGTTGGTTTAGAATCTTATATCGAGTTCTACTATTCATGGGATGAATAAATAATATCATCTTTTATTTCTATCCGCCTTTTCAAACCTGCCCCTACCAGGCCGGATTTCTCGGACGATGCGCGGCGTAGCCAATCAAGTACTGCCTTTTTTTTTTTTTGCTGACACTATATGTATACGTGCATATAATCAAACAATAAAGCAATTGTAAGCGTCAGCAATTCTAGCTGTACTAAGATCGTAGTGATTATATGCGCTTATATTTACATGGTATGAAGAATAAAATTTGAATAAATAAATAAACGTACTCTTTACGAGTACAAATCTCAAAACTAAAAGAAAAAAAGGGTTACATCTTGTTTCCAAATAGCGTCTATAGAAATGTAGG…	ARS1328.2	13	779200	779600	62	0.04	1	AAAATTTGAAT	1	779432
GGACGTGCATATATTCTTTTAATACATTTAAAATATGATTCTAATCATTTCTTATATAATAGTGTATAGTCTAATCATTCATCGTGTATAGTAACCCTTTTTGTTTTTTTTTATGCAAAGTTTTTTTGTTTTTGGCAATCTATGAGGTTTGAATATTGGATAAAAGGAACTCCGCACAGTAATACGGAGCAGTCAGCTAATTTAACCAGCACTAATAGGGAGTACATTCAATTGGAAACTTTGATTCGCTTGTATGCGTGAAAAGCAAATTCCCTTCTAGAGAAGTTACTGAAAAACATGAATTTATTACGAATGAATGCTTTAACAAGCAAGGCTAGGTCAATAGAACGGTTAAAACAAACATTGAATATTTTATCCATTCGTAATCATAGACAATTC…	ARS1329.3	13	801600	802000	44.42	0.03	4	AAAACATGAAT	1	801764
TATAGACTTTGTTTTGATTATAGCTCTTAGGCAAATTTTTGACTAATACAGTTGTTAATTCTCTATTTCTTGTTAAAGCTTCGTTCGCCTTCTTAGAAGTTAATCCTGCGGCTGCTGGTGATCCTTCATCCAATGGTCGTTTTGAATCTGGTCTAGCGTGATGTCCATACTCCATTATCACAGATTATGAAGTGAATATGTGGGCTTGTTTATCGCTAATGATTCTCATATAATAAATATAAAGGGTTTTCAATGTTGTAGTAAATCTGCCATTTTGAATAAGTTCCCGCCTGAAAATTTTTTAGCGATGACTTTAAAAAAGACATTGATGCACTCTACAATTCATTGTCATGATGTACATAGAAAATTGAATGATACAAGCGGAAATATTATCAGAAT…	ARS1329.4	13	804000	804400	44.42	0.03	2	GAAAATTTTTT	0	804337
TAAAAGACATTCTTAAAAGTTTGAATTTATGATCTTTTTATTTTTGTATTTAGTCTTTGTTTTCGAACTTTTATTAATATTAAATTTCAGTAAGTAAATTAAAAGAACATCTTTAAAAGAGTATATTTATTGTTACATATGTTGATCTTAAAAGGAGATGAATATTTCTTAATGGAAAAAGGTAAAAAAAAGATTTTCTCATTCATATGTTCCCATTAGGCAGTTCTATGAGGCAGTCGTCCAACTCGTAATCAGAGATCTCATTCTCATCCTCTAAGTAGCCCTTTACCTGAAAAAATGTTCTTTTGTTTAGAGCATCTTCCGTCTCTTCACGATTTAAGCGTTGTAGCTTGGATTTGTCCTTTGATGTCAACCGTTTATCCTTCAATAACTTTTCCA…	ARS1329.5	13	805200	805600	44.42	0.03	2	AAAAAATGTTC	1	805413
CCGGGATATTTCGTTTGGAATGTTCAATTCATCCACATCTAGAGTTACATCATGGTCCAAGGCAGACTTAGAGAGAAATTTTTGCCATTGAGCATCCAGCTCAACCCTCATCATATCAGAGGCGTGCATTAAAGCCCTATTTGAGATCTCCCCCGGCTGTACGCTTACATTTGCAATACCTTCCGGTATATCTTCATACAATTTGTCTACACTAGGGTCAATAATTGTATTGGGATTAGGCCAGCTCGTCCAGTTATCCTTAATTTGGGTCTTCACAAACTGGTTTACTTCATAAAAATGTTTTTTTTCATTTGCCTTATACAATAGTCTTTTCAAGAGGTACGCAGAGTATAAATGCAACGAAAGGTCGACTCTGTGCGAGTGTTCTAGAGAATCTAA…	ARS1329.6	13	805600	806400	44.42	0.03	3	TAAAAATGTTT	1	806185
GCCTGCCTGAATTCAGCTTGAATGACCCAAATCTTAGTGCTTTGCATTCTAATCCCAGTTCAAGGAAAGTTTTTTGATATTCCTCTAAACTTGTAGTAGATGCAGACATTATTGGATTATGTTTTATTATTCTTGATGGCTCTAGGTCTCGACTATTTTGCGTGACACTTCCTTAGTTCTTAATCTATATAAAAGAGCCTGTGATGGCCTTTTACCCTAGATTAGGAAGCGAAGGGGCCTTTCCCGAAAGGTTATGTATGACTCCCTTGAAATGCATATGATAATTAAAACCAAAAAATGTTATGTGATTCTGAAAGGAAATGCTGTCATGTGAGTCAGGTGTAGAGCAGGTTAGAACAGTTTATATTACATAGTCTGAAAGGCACGTGAGAAAGTGCC…	ARS1329.7	13	807600	808000	44.42	0.03	2	AAAAAATGTTA	1	807729
ACTACTTTTCCTTTCCTCTTGCTTTAGTGCAACCATTTTTTGAAAAATGAATGGTCTTTCTGCACGAAATATCTCTCGAAGAGCTTTTCTAGATATTAAGGATAAAGTATATCATCCCAAAAGTTAGGTGATGGAATCAATATTGATGGACCAGCTAAAACACGTTGAAAGCAGATATCAGGAATGGTGTTTTACAAAGTCACGTTGAGTAGGTCGCTTATCGGTGTGCCACACACAACGAAGAGCATTGTCAAAAGTTTGGGTTTAGGTAAAAGAGGGTCCATAGTCTACAAAAAAGTAAACCCGGCCATAGCTGGCTCCCTAGCTAAAGTAAAAGAGTTAGTCAAAGTAGAAGTAACAGAACATGAATTAACACCATCGCAGCAACGAGAGTTGAGA…	ARS1331.5.0	13	841600	842000	47.79	0.01	1	AAAAAGTAAAC	1	842048
GATGAAGCTGAAGATGAAGTTGAGGATGAGGATGAGGGTGAGGATGAAGTCGAAGAACCAACCGTAGATGCTGCCTCGGAAGATTGAAGAGTGCTGGTTTGTTGTTGAGAAGTGACGACATTAGCGGAAGTTGTTGGTTCTAAAGTGGATGTAGTTGCTTGAGAAGCAACTGCAGTACTGCTGGTAGTAGCTACAACAGCATTCTCGTTCACTGGAACAATAGTTTCGCCGCTGTTACCGGAAACGACAACAGTAACCTGCGCATGGACTGTGGCAGTAACAACGTCACGCTTTTCATGTTTATGGCGAACAGCAGGAGCTCCTAGAGCTCCGGTTAATAATGCAGATACAGTTAGGAAATTTGAAAAACGCATAATGGAATGAAGACTTTTTTTGCGT…	ARS1331.7.2	13	880000	880400	47.12	0.03	1	TTTCATGTTTA	0	880148
ACGATCTTATTAAGGAGAAAATTAATGATTTGCCATTTTCTTACTTTGGCTTCAACTCATCAGAACCATCGTACACCCTGAGAACAAGAATCTGGGCATCATTGCGGACGCAGACTTTGTACCGAACCCTTTCAGGGTTTATGAACTATTCCAAAGCTATTAAGCTACTGTATCGAATTGAAAACCCCTCTTTAGTTAGCTTGTATCGTGGCAATAATGAAGCATTGGAGAATGACTTAGAAAATATGGCTAGCAGGAAATTTAGGATGGTTGTTGCTATGCAGAGATATGCAAAATTTAATAAGGATGAAGTGGAGGCAACAGAACTACTTTTAAGAGCCTATCCAAATATGTTTATATCTTACCTTTTGGAAGAATTAGAGCAAAATGAATCTGAGA…	ARS1331.7.4	13	883600	884000	47.12	0.03	2	AAAATTTAATA	1	883924
CTGAATCCAGTACTGCCTCTTCTAACGCTTCGGGGTCTTCTTCCAAGTCTAACTCCGGCTCTTCTGGTTCTTCCAGTTCTTCTTCTTCTTCTTCAGCTTCATCTTCATCTTCTAGCAAGAAGAATGCTGCCACCAACGTTAAAGCTAACTTAGCACAAGTGGTCTTTACCTCCATCATTTCCTTATCCATTGCCGCTGGTGTCGGTTTTGCTTTGGTTTAAAAAGCTTCGACACATACATAATAACTCGATAAGGTATGGTATCTTATTTCATTGTGGGGTAGTTTTTACGAAAAAAATGAAAAGTTGTAAGTATAGTATATATTTTTTTTCTATGTAAGTTTTATAAGATTCTATTCGCTATTACCACCGGTAAATTAAAAAGAACACTATTGTTACA…	ARS1331.7.7	13	888000	888800	47.12	0.03	4	AAAAAATGAAA	1	888751
TCATTTAATATTCCTTATAGAACTACTTAACATTGTTCTTCTTTCTATTAAACGTCTTTATGCAAACCATTTATGTACTTTCTCCATAATATCAGCTGGATATCTATTGAAAATTGCCATAGCATCACTAGAAGGCAAAAATCCCAACAACTTTTTAACTGAACTTATCACCGTTTGGCCTTCCCTTTCGGTCAAACTTCTCTCATTCAAGGCTTGTATGACTGAATCAACTACAGCGGAGATATTAGATTGAGCACACACAATTGGCGAATTATTTTCAATCAATTGACTCAAAAATTGATAGTTGAATGAGGCAGCTTCTTTGTCAGTTATTGTTGGTAACGTTTTGAACCAATTAGCCGTGTACGTGTCTACGTTAGGAATGTTGGAATTGTATGC…	ARS1332.0	13	889200	889600	44.56	0.06	1	AAAAATTGATA	1	889184
TCTTCTATCTACAATGATTTTTTGTTAAGAATGCTTTCGAAGTAGTTTTTGATTTTATTGATCAACGACGATTTGATGGTGGGTTAAGACGTTCTTTAGCGATTTTATATTCTTTGTTCAATTTTACCATTGCTTCTTCCAATTTAGTAATTTCATCACCCTTTTCGACAACAAAGATGGTCTTCTCGTCGTTTAATTTGGCTGGGATTTCCAATTCTGCGATAACAGATTGCAAAACTTCAACCACCTTATTTTCTGGAAGATCAAATAATTCGGCTAGTTTAGCAACAGAAAAACTTGAATAGAACCTCTTGAAAGAAAAGAAATAAGTCTTCAAAGATTCAACTTGTACTCTTTCCGTTAAACTATTCAACACCGTTTCCATGTTTGGTAATAAAG…	ARS1332.2	13	893200	893600	44.56	0.06	1	AAAACTTGAAT	1	893216
GAGTCGTCAGATTCTTGGTCCAATTCAGACTCAGAGGAGGAAGAGCTTAACAAATCTTCTTCAGACGAAGATAAAAGATCTTCTTCGGATGAAGAACTGGCTACATCGTATTCGTAATTAGACGAAAAGAAACGGGACATTTTCGTAGATCTCGGGCTTGGCAGGCTATTGTGTGAAGATTGCAAATATGTGCCTTGTTCTCCTTTTTTTCCTTCTATGCTACTCTACTAACAAGTGCAACTGCGAACCTGTAGCTAATTTTTCATTCCTTTCAAAGCTCTTTTTCTCATTGAAAAATTTTTCAACGGCGAAAAAAATGCGAAAAAAAAAGCTTGGTCGTTTCCAACGAGTAGAGGAAAGTGACAGTAATAATAATGATTGCGTCTCTAATATATACGT…	ARS1332.4	13	895600	896800	44.56	0.06	2	AAAAATTTTTC	1	895576
GTATTATCTAGTCCCGGTATATTCCTTTTATGTGATGTCAATTTGGCATTTTTCTGCGTATTTTCGTAAACTTGTCTTCTAAACTCTTCAAGCGTTTCTGGATCCTGTTGCGCCAGCTGCTCCGGCGATAAGGCTAGCGGGTTTTTAAGTATACCTCCCATTATTCTGCTGATGTGCGTTCTTGATGATACGAACTCGTTGTACTGATGAAGCTCTTGGACTTTAAGTTGTAGTGGTGTTCTCAAATTATCCTTTCGGTGGAAGTCATTTCTCCCTAAAAAAGCGTGAGGGCAAAACTTGAAACCGGGTAAGAATATGCGATAGTACCGTTTTGCCTCTAAAGACAGTGCTTCAGAGAAATATTAGCAAGGTGTCGAATCAAGTTATACTAGATAGGAG…	ARS1332.5	13	897600	898000	44.56	0.06	3	AAAACTTGAAA	1	897732
GCGAAGAGGATCTCTGTGTTTTTCTTACTGTATTCGCGTTTATAGGAGGCATATTTGGATAATGCTTATAATAGTAATATTTTGACGTTTTTATTTCATGCTTCAAATCATTTACCACCAATGGTGCCAAGTATGGTCTCGCCAAAGAAACAATGAAGTTATTAACATTGAATAGTTCCGTTAACCTAGTATAGGGGCTCTCCGTTATGCTCGGATTGTTGGCATTTTCTGGGGTAAGAAATTTGACTTGTTTATTTTTATTGATGTTAAGAAAAGGCTCAATTTCATTTTCTAAATTTTTACATAATAGTGATGTATCCTCTGAAATTACACCAGAACCAAGTGAGCATTCAATGGCTGACTTGATTAATACGTTTGGGGTTGTCACATAATTTAGTA…	ARS1332.6	13	900000	900400	44.56	0.06	2	TAAATTTTTAC	1	900162
ACACGACTAACATGAACATGAACCTCATGTAACAAAAGTTTGCGTATAATAAACCAGTATAGATGTGTAACTGTAATTTTTAACTTATCACAAGCTCGTTCCCTTCCTGCGTTGAAAAAGCGGGACAATGCCAGAATATAAAAAAAAGAAGAAACTTTAAACCCTGTCATATCTTGTCCGAGATCTCGTCGTTCTTGTTTAATTGATCTTCTTCGTATACTGCCAAAGGTGCCAAGGCACAAAAAAGTTTAAAGTGGCACGGGCTATTGCGTCACATAAAGCCCGTAGCGCAAAAAAGTGATAGCTGACTTCATTAGATCACCAAAATGGAAAAAACTTCGTGAAGATTTCTTTTTATCTTCCTCACAGTTTTTAACTTCCGGGTGTTATACTCTCCGT…	ARS1332.9	13	906000	906400	44.56	0.06	3	AAAAAGTGATA	1	906092
ATTCAATGAAACAAGGAAATTTTCAATTTTAAATTTAAGTTGAAATAGCCTTTAGCACCTAAAAATAAAAAAATATTAAAACACCAACATGTTGTTGAACAAGTTTTCCAGAGAATTGACCGAATATTTAAATTTCTATTTAAGAGTCATATAAATTTATTGAAAATCAAGTTGTATATCTTTAGAAAAGCACAAATCCCTGTAAAGCTGCAAATTGTCGGGCTTAATGTGTATAACAGCAGAATAGTCATCAAGAGCAGGTTTATAATCATCGACATTGAGGACTTTTTCGTAAAATTTTTCGTCAACAGACACATGATCAGGAGCAATAAGAAGTGCTTCTGTTGTCATCTCGTCATTCTCATCGTCGCCATCATCATCATCATCGTATACATCAGT…	ARS1405.0	14	28800	29200	54.4	0.04	3	TAAAATTTTTC	1	28872
ATGGTGTCACTTACGTAGATGTTACCACCACCCCACAAAGTACTACATCTATGGTCTCCACCGTGAAAACTACTTCCACTCCATACACTACAAGTACCATTGCCACTCTATCCACTAAATCTATCAGTAGCCAAGCTAACACCACCACCCATGAGATCAGCACATACGTCGGCGCTGCCGTTAAAGGCTCCGTTGCGGGTATGGGTGCCATCATGGGTGCTGCTGCCTTTGCTTTGTTATAAGTTGCATGGACAACTTAAACTAGGAAGGATATTCCGCTTCATTTCATTAATTTCACATTTTTTTATCTACATGATATGTATTTTCCCTCAGTTACCAGATTCGCTAGCTTCGAAGCAAGGACTCCTTGGTCATACTTAATAAAGGAACGTCTGCTTC…	ARS1406.1	14	66000	66400	43.48	0.71	2	TTTCACATTTT	0	66101
GTAGCATTCCGTTACGTGATCTGTACTTTAACCTCTTGGACGTAAAGAATGGCAGAACTCTGGCTCTAGTGTTCTGCGAATGCCAGATCGGGAAATATTTCCCAAAAGGGCAACAGCGGCACGAACAAGAATTTCGTGTTAAAAATCGCGTCCGGCGCGAAATTTTTCGCGGAGGCATGCGACGCAAAAGCGACTCGAAATGTCGGGAGCCAAATGAGGCTACAAGGCTGTGGGCAGATTTTGGCGTTATTATGGAGAATAAAAGGAATGGTAGCTTCCATATAGCGATAGGAAAACATATATAAGGTCAATAGGCCTACATGGTAATGGGATTGATAAGCTTGTCCTTAACTCTTGTGTCTTGGAATTACTATTGCGTACATCAGCAATCATCCATTG…	ARS1407.0	14	87600	88000	33.62	0.48	1	AAAACATATAT	1	87729
TCGTGCCGTTATGCCTAAGGATCATGGAATCTTCTTCTGAGCTTTCCAAGACAGTCGCCATTTTCATTTTACAGAAAATCCTACTAGATGACGTTGGATTGCAATACATCTGTGCCACCTTGGAAAGGTTCTACGCCGTAACTAATGTCTTAAAAGATATGGTTGAGCACTTGACCGTGAGCACACCACCGGGACGACTACTGAAACATATCATTAGATGCTACTTAAGATTAAGCGACGATCTCGAAGCACGCAGGCTATTGAAAATAGTCTTACCTGCCAAACTGAGAGATAACACTTTTACGGAAGTACTAAGAGACGACGTCGGGTCCAAGAGATGTCTGGCACAATTGCTACTGACATTAAACGAAGAAACCTCATGATGCATCCCCATAGATA…	ARS1407.1	14	91200	91600	33.62	0.48	1	TAACACTTTTA	0	91332
CTTCCAAACCCACTTATATCAATTTGACAGATGCTACACTAAGAACTTTGGATAACTCCGATAATATCGTAATGGAGTGTGGAAAAAACCTCACTAATGCATTGGTGGTTTCTACTACGCTGAAAAACCGATATTTCTTACAATTCGGTAACAAAGAGTCTTTCAACGCATGGAATTCTGCTATACGATTATGTTTATACGAATGTTCTTCGTTACAAGAGGCTTACACAGGCGCATTTATTTCAAGTAGAGGCGCAAAATTAGGTGATATCAGAATTCTCCTTACGAATAGAAAATATGATTACAAGGATTGGGTCAGCGTCAGATTCGGAGCAGGTATGCCGTGGAAGCGCTGCTATGCGGTAATCTCTCAATCTAGCAGTAAGAAAAAGGGTCATT…	ARS1410.0	14	114000	114400	38.53	0.06	1	AAAATATGATT	1	113973
TCAAAACGGTAGTGCTGGTTACTATCGTCCGCCGGCACCACAATTGCAAAACTCCCAAGCCCGTCCACAAAAGAAGGACGGATTCTCACAGTTCATGCCATCTGCAACTACGAAGAACCCATATGCCCAGTAACTCGACCGACTGGTTGTAATTTTACAAAAAGAGAGACAATTAAGAAAAGAAACAAGCGCCAGGCTTCCGTATCCCAGTTTTTCATCTCACTTTCTGGGCACGATTGTAATAATACTTCATGATAATAACTAAACTATATAAGTAGTGTCTCATCCGTAAATATACATTTAGACAGATTCTTGTATTTTCTCCGGGCAATTTTTAACTTTTTTTCTGTTAGGGCACATGACACTTGCCTATTATGGACAGCCAGTAAAGATGTGCCA…	ARS1410.1	14	116400	116800	38.53	0.06	2	ATATACATTTA	0	116611
AGTCTTCATTTTGTAATTCCGGAACAATAGTCAAGACTTTCCCGGTCAATATCACATTCTTTGCATTTTCAACGACCAGTTCTTCCATTTTCTTTCTTGTTTCTACACTATGTGTGCCCATATGAGGCAGTCCTAAGACTTGGGACATCGATAATAACTCTTTGGATATTTTTGGCTCATATTCGAAAACGTCCAAACCAGCACTTCTAATCTTTCCAGAACGCAAAGCATCAGTCATGGCTTGTTCGTCTATCACGGCACCACGCGCTGTGTTAACAATAACTACACCATCTTTCATTTTTTCAATAGTCTCTGCATTGATTAGATGGTGAGTATTGTGGTTCAGTGGGACGTTTACAGATACTATATCAGAACGCTTCAAAAACTCCTCGAATCCTA…	ARS1410.2	14	121200	122400	38.53	0.06	2	TTTCATTTTTT	0	121437
TTTTAAAGATAAGGACTACAGGGCTTTATTGTTGCTGATAGGATACTCCATTCCACGTAAAATCAATGAACCTTGTTTTTTACCGGGGACTGTTGAAGTTTCTGACCTGACTGTTTCTTGTGAACTAGTGAAAAAATACTTATCAACACCATTTGAAACTCCAAACGGACTGCCTTCTTCTTCCTATCTTCTACGAGTTCGTTCAGAAAAGGATAGTTTTTCTCACAATGAACAAGATGGATGGGAAGGAGACGATGATTATGATTACAACGATCCCTACATTGTTCCAGATGATCAAATTTTATCGAAAAGCGACGCAGCATACTTCAAGGATTTAGATAACAATGCATCAGATAAACTTAAAGGTACCAAATTCAGTAAAGGGATTGCGAGATCCAA…	ARS1410.4	14	125600	126000	38.53	0.06	1	GATCAAATTTT	0	125812
TGTTGTTGGGATGCATAGGTCGGAGAACCCGTATTGCTATTCGTTGCATTTGAGTTAGCCAAACGCTTCAAATTTTGGAATATACCAGAACTCGAATTCGAATGACTTTCCTTTGAGTTCGAATGTTTGGAGCCTGAATTCTTCAACATTTCCTTTCCTTCTCTTCCTTTCTTGCTTCTCGTTTGTTGAAAAGGTTCAGGTGCCTTCTTTATGTGGCGTGTATTTAGAATTTAACTAGGCTTGAGTTAAAATGTTTCTCCTCAATACAGAAGATAGATACAAATGGCAAAAAAAAAAGTAAAAAATGGCCCAACTGTATGAGACGTATAAAAAACGTGAAGGGTGAAGAAAAGAATGCCACTGTCCAATTTTATGCTTAATACGAAAATAATTAACACA…	ARS1410.8	14	135600	136000	38.53	0.06	1	AAAAAGTAAAA	1	135526
CTGGCAAATTCTAATCGACCCTGGACTTGGTTTTGCTAAGACCTGGAAGCAAAACTTACAAATTATTAGACATATCCCCATTTTAAAGAACTACTCATTCACCATGAACTCAAACAATTCGCAAGTGTATGTTAACCTCAGAAATATGCCCGTTTTATTGGGTCCATCGCGCAAAAAATTCATTGGACATATCACAAAAGATGTGGATGCGAAGCAAAGAGACTTTGCTACTGGAGCGGTGGTAGCGTCGTGTATTGGTTTCGGCAGCGACATGGTTAGGGTCCATGACGTTAAAAATTGTTCGAAGAGCATTAAATTAGCAGATGCTATTTATAAAGGTTTGGAATAAAGGTTAGTTATATAGATTAAATATGTAATTCTGTTTTGTAATAATTTTTT…	ARS1411.0	14	166800	167200	43.88	0.07	5	AAAAATTGTTC	1	167040
ATATCACAAAAGATGTGGATGCGAAGCAAAGAGACTTTGCTACTGGAGCGGTGGTAGCGTCGTGTATTGGTTTCGGCAGCGACATGGTTAGGGTCCATGACGTTAAAAATTGTTCGAAGAGCATTAAATTAGCAGATGCTATTTATAAAGGTTTGGAATAAAGGTTAGTTATATAGATTAAATATGTAATTCTGTTTTGTAATAATTTTTTTTCCTGTTTCATAATAAAGAATCGTTAAAAATAACCAAGGGAGGAAACAAGTGAAATGAAGTATAGAAAAGATATAGAAAATAAACTTAAATATTCAGTTTACTTGTGCTTCTTTTTTCCCCTCTATGAAATATAGCATGATAAGTGATTGTTCCTTTGTTTTTTTCAGTGGATGTTTCACCTAAGCC…	ARS1411.1	14	167200	168000	43.88	0.07	6	TAAACTTAAAT	1	167228
AGGGGGAAAAGGCATCATGGCCTGATAAGTCGTCACTTTCTCTATCATGTATGTCATGTTTTCCTTGTCTTTTCATTAACAGTAAGTTATCACCACTTCCCTTTTTTGTGGAATAAACACCTTTTCTCCTCACTCGATTAATTCCCAGACCAGGCCCAACCATCTCTGTCTACGCAGGTCAAAAATTTGTGCTAAGGTCTCGAGAGCACATACAGTACCCTTTTAATGTGATCTCATCGCTACATTTTTCAAAGCTTCCCATTTTAGCGACGCCATCTATATATAGGAAAAAAAAAAAGTTTAGGACGCTATTTACCACAACAATTGAGATGCAGCACAAATAGGAGTATCATTGCCTCCCAATTTTCAAGGGAGTTTTCAGAGAATTACTATTCCATA…	ARS1411.2	14	168800	170000	43.88	0.07	4	AAAAAAGTTTA	0	169377
AGGCAAGAATGACACACTATCAAATCATTTTGTTAAAAACGAAAAAAATCTAATAACTTATTGGAAAGACATGTTCGATAACACGATGATTGAAAAACGTAGGAAAAACAACGGTGGAGGCAACAACCACAATAAAAGGACGAGTAAGAATACTGATAGGATTGGCAAGGATAGGCCGAGTAGATTCAACTCAAAAAAATAAGTTACCTGATGGAAGGAATGCGGTAGAAAATGCACATTCTTTTTCTTTCATTTAATGATATTTACATGTGATTGACGACAACCTAATATATAAATATATATGCACGCATATATTTTGTATATGTAACGTTAAAAACGCATCTGTTTTTGTGATTTCAATTATCCGCTAAAAGAAATTCTGTTTTGTTAAAGTAATCT…	ARS1411.3	14	171200	171600	43.88	0.07	2	TAAATATATAT	1	171376
ATAGGTCCTTTCTGCAGGGATAGAAATTTGTGTTCTGCTACAGTACCCTTTTTGAAATAAAAATATGCCGGAAACGTCCACATTAGTCTCTTTTCTAGTTCTGATTGGTACTCATAGTATTTTTTCTCTAGTTCATTTAATTCTGATTTAATTATAGGGATTCTTGACAGTAGTACTCCGACTTTAATCTTGGGGGGAGCGGAACTGGCAGTTGCAGTTGCAGTAGCAAGCCCTCTTTTCAACATTAAATTTACCTTCATGGTACTGGATAAGCGCTTATGATTACGTAGAATATAAAGTTTATTGATTGTTTAACTGTTTTCTTTCCTTTTTTTTTTTTCATTTTCATTTTCATCTAAACCTTGAAAAAAAACCAGGAATACGGTAAAAAAAGAGAAT…	ARS1411.4	14	172000	172400	43.88	0.07	1	TATAAAGTTTA	0	172318
GGTCCTGGGCCACAGATGGATAGCGGTCCTTCCTGCCTGTCGATGGCTGAGAAAATGGTGCCGGAGGAGATCTTGATCTATTCCTTCTTGAGTTATATCTTTCTCTTTCACGTTCACGTTCACGTCTGCTACCATATTCGGTAATTGTATGGGCTTGGGGAGGTGCGACTGTACCCACGGATGTATGTGAAGGCAAAGTTTTAAAATGTTTCTGCAGAGCCGCTATTACTTGGAAAAGAGCTGCTTGCTGTTTGGCTGGATCTGTGGAAGTCAAATCAGTTGGAAGACTTATGTTCAAGTTTAAAGGAGGACTTTTCTTTAGATTTGACAAGATTTGTTTCGACCTCTGCTTGGGATCCAGTGATAGTTGTTGTGAAGCGGTGTTCGCGGTGTTATTCG…	ARS1411.5	14	173600	174000	43.88	0.07	2	GTTCAAGTTTA	0	173745
GGCCTTTCAAATATTGAAAACAGTGATATGGCTCAAGTAAATCACGAAATGTCACAGTTCAAGGCTTTCATCTCTCAGGATTTAACTGACACTATAGATCAATTTGCAAAGGATATTCAACTAAAGGAAACAAATTTATCCGACTTGATAAAATCAATAACCGTCGATTCACAGAATTTGGAATATAATAAAAAGGACAGATCTAAATTAATCCATGACTCTGAAGAGCTTGCTGAGAAATTGAAATCATTTAAAAGTTTGTCTACTCAAGATAGCCTCAATCATGAACTGGAAAACTTAAAAACATACAAAGAAAAGCTGCAATCTTGGGAAAGTGAGAATATTATACCAAAATTGAACCAGAAAATAGAAGAGAAAAATAATGAGATGATTATCTTA…	ARS1411.7	14	176800	177200	43.88	0.07	2	AAAACTTAAAA	1	176832
GGGGAGGGCCGAGCGCCGCAGCAGTTTATGTTGCTAGAGCTGCACCTGTGGCAATTATTCGGCCGTTAATTGGGGCCACTGAGGCAGTGTCTAAGACTTTACAGGGAATAGCTAATCAAGTGGATAAGACGCATAACGAGCAAATCAATGATAAGTACAAGTCCAATCGGACTGATTCGTAAAAATTTTTGCAGACATTTTTGATATATATTCAATTCATATTTTATCTCTTTTTTTTTTTTTTTTTTCAGACGTGGAATGGTGGGAAAGCCAAAATGTCACTGACCGCGGCTAAAAGTTAAAAAATACATGAGACGACATTCTTTTATGTATATATATTTACACATGTATACAAACAAATACACACGCAAGTAGAGAGGAGTTGGTGGGGGGAAGATG…	ARS1412.0	14	196000	196400	47	0.32	6	TAAAAGTTAAA	1	196212
TAAGAAGCGATTTTTCGAATGAAGATATATATGATAATATTGATCCTGATACCATAAGCTTTCCACCAAAAATTGCAACAACAGATCTTTTCCTGCCATTGTTCTTTCATTTTGGCAGTACGAGACAATTTATGGATAAACTTCATGAAGTTATTTCAGGAGATTATGAGCCATCACAGGCTGAAAAACTGGTACAGGATCTTTGCGATGAAACTGGTATACGTAAAAATTTCAGTACGAGCATATTGACGTGTTTATCCGGGGATCTGATGGTCTTTCCTCGCTATTTCTTGAACATGTTTAAGGACAATGTTAATCCTCCTCCCAACGTTCCTGGTATTTGGACACATGATGACGACGAATCGCTAAAAAGCAATGATCAAGAACAAATAAGGAAAC…	ARS1413.1	14	243600	244000	46.95	0.17	1	GAACATGTTTA	0	243997
CGGATGATGAAGACGATTCTCTAGAATTTGTAGCTGCCATAAAGAATATTTCTAATTTAGGTGGTAAAAGCATTGATCCTCATAAGCCAATGTTGTATATGGAAGATCGTAATTTAATTTTGACTGATGGCGAAAATGAGAACAAACTTTATAAGATGGATATAGAAAGAGGAAAGGTGATTGAAGAATGGTCTACTGGTGACAAGAATGTTGTTCAATATGGTCCAACCAAAAAATTCGATCAAATGACGCCTGAACAAACAATTGTTGGCGTTTCACAGAAAGGTGTCTTTAAAATTGATCCTAGAATTAACGGAAAAAATAAAATAGCCGTCGATGAATCAAAAGATTACGTGGGTAAATATAACTTTAGCTCTATTGGAACAACAGAGAGTGGTT…	ARS1413.2	14	248800	249200	46.95	0.17	3	TAAAATTGATC	1	249085
AGGCTGCTGATGAAGCTTTTGCTAAGAAGCACGAAGCTAGACAAAGACTAGAATCCTACGTCGCTTCCATCGAACAAACCGTCACTGACCCAGTCTTGTCTTCTAAATTGAAGAGAGGTTCCAAGTCCAAGATCGAAGCTGCTTTGTCCGATGCTTTGGCTGCTTTGCAAATCGAAGACCCATCCGCTGATGAGTTGAGAAAGGCAGAAGTTGGTTTGAAGAGAGTTGTCACCAAGGCCATGTCTTCTCGTTAAGATGTCATTCTGGTTAAGGTTATACACATATATATATTTTTCATTTTTAATGTCTTAGCTTTTGTATCTTAGATGAAGTTTTAGTTCTGTATATCACGATCAAGATATCATACAATCATAAATTCAATTATTCTTCTGTTTCCCC…	ARS1413.3	14	254000	255200	46.95	0.17	3	TTTCATTTTTA	0	253938
TGGTTCATATTGAGAGCATCATCACTTGCATATGCTTGAGCAGATTGGCCCAAACCCAGCATCCTGTCATAAGATTTGTCAATATGGTAGCCGAAGCCGTGCTGTGTAGCAGAAGACTCTTGGTTTGTGTCTAATTCATTGCTGTCGAAATAGTGAAAAGAAAAGAAAAAGAGTTAGTAAGATGTGTATGATACATTAAAAGGAAGTTAAAATACGATTTCTTTTTATTAGATGGTATCATTACATTGTTTGACGTATAGTATTAGTATTATTAGAGGTTGAGAATTAAAGATATTATATTTAGGGAAACATAAAAGATTAGTGGAATATCGGTGCAAAATATTAGTAATAAATAAAATTGGTATCAACAGAGAATAGGAGAAGGCTAATCGCTGCAAT…	ARS1414.0	14	272400	272800	35.76	0.12	1	TATTATATTTA	0	272538
GTCGTCTTCCCAAATCCGACTTGTGCGGCTGTGCGGCTGTGCACTTCAGGGGGTGTCCTTGCCGTAATTTCGAGGAGTCTTTGTAAGTGATTAATTTTCTCAAAAATTCAACGTATGAAAAGGTGATAGTTTCGGCATCTGCGATATTCTTTTGGACCAGTTAGTGATGACGAAGGCCCTTAAGATTATGTTGGGAGCCAAATTTTCGTAGTTGCATACGTAATTTTGAATTTGATTTGCTTTTTTTTCTTTTTTGCCTTGGCTTTCCGTTGATGCGGATTCTTGAGAGTTCTAAAAGTTTATGTATACAAACACCGCATTGAATGCTTCGCCTCTTAAGCAGACAACTAGAGTATTGTAAACCAGGTAATGGGACCTCCGAAAAATTTCAAGCATTTC…	ARS1414.1	14	274000	274400	35.76	0.12	1	TAAAAGTTTAT	1	274290
ATGATTTTTCAAGGGATGACGAGTACGATGATCTCAACACTATTGATAAATTACAGTTTCAAGCTAATGGTGTACCTGCATCATCCTCGGTGTCTTCTATCGGATCTAAAGAATCCGACATAATAGTAAGCAATGATAACTTAACCGCAAATAGAGCACTAAAGAGAAGCGGTACTGAAATTAGGAAATTCAAACTTTGGAATGGTAATTTTGTTTTCGATTCTCCAATCAGTAAGACGCTATTGGACCAATACGCTACTACAACAGAAAATGCAAACACTTTACCAAATGAGTTTAAGTTTATGAGATATCAAGCAGTTACTTGCGAACCTAATCAACTTGCAGAGAAGAATTTCACGGTGAGGCAGTTGAAGTATTTAACTCCAAGGGAAACGGAAT…	ARS1414.3	14	277600	280000	35.76	0.12	7	GTTTAAGTTTA	0	277736
GAAATAAATACAGAAGGTTACGCTGTCGATTTGAATGTTCACGCTTTTTTTCCTTCTTATGAGTTGTAGATTTACTGCACTTTCTAAAGCTTCTTTGCTGTGAAATTTTAGAAAAGGGAATTGTCGCCTTGGTAAGACAATTAATGTTACCCGCTTCATTATTATTAATTAGTGGCGCGATATTTTAACGAACTTTTCCATTAATTATTATCATACTAAGCTTTTACATTTTTCTGATAAAATAGTAGATTATGAACAGGAGGTCAATCTATTTAGGCTTCTATAGAACGGTAAAATATGAAATTAGTTTAACAGAAGTAAATATGACATTGTATTTTAACATATACTCAAATAGGATAAAAAAAGGTTATATACAAATGCTTGGAAAAGAAATAAAAG…	ARS1414.7	14	292800	293200	35.76	0.12	2	AAAATATGAAA	1	293017
GCTTAGAAAGTTAAATACCATCAAGAGAAAGAAAATTAGGTAATACAGAGGACAGAAGGACAGAAGTCGTTTCTATATTACATAAAAATCGGCCACCTTTTATTTTTTTAAACCACAAGAGAGGGGGAGAATGATGGATGTAAAACCTTAACCATGTCAATGCAAGGGCTCCCGCCCCAAAAGTTCCTATCGGGCCCCTTCGCTTCGCTGCCCCAGATATTTGCGGAAAAGGCCAGCCTCGCAGTATTTCACCAATGCCCTTACTTTGATAGTATGTATTTTGACTACTTTTTTTCATTTTTATCGCTTCTTTTTACTTTGTGCGGTGTAAACCCTACACAAAATAGGGCTTTCATTTAGTATTTACATTTGCACAAAAGTAGAGAAGATACGTAATAG…	ARS1415.0	14	310400	310800	29.42	0.3	1	TTTCATTTTTA	0	310386
TCCACTTTTTTTCATCCCTTAGATGAACCGCCATCGATTACCAAGTCGTTATACAGCATAACTGAAAACAGTTCAATACCATTATGTCCGTTCATTAGTTTCTCGAGACTTGTTGCAACCGATACACAGGTCGAATTACGCATTACTCCAAGAAGTTTCAAAATCTTGGGCTTGTATGAACTCGTACACTCTCCAAATTTTTTACCGGATTATGTTTTAGGCATCCTTTCCAGCTTTAAAGTGGATAAAGACGAGTTACAAACATATCCCTTAGGCATTTTGGTGCCTTTACAAAACATTTTAAAAATTCTGGAAGATAAGCTATCTGAAGTAAGAGACAACTTGGAGTTATTAGATAGGGCCGATTTACAAAGGTGTAGTGCCATTATCAATAGTATA…	ARS1415.1	14	312800	313200	29.42	0.3	2	AAAACATTTTA	1	312998
AAAAGACGCGTGGAAAACTTTCTATTCCATAGCACCGCAGTTCTATTTCTTAATTGCATTCTTGTAGAAAACTTTACAGCAGGCATCCTCCCCATGAGGAGCGTCCTCCCTTGCGCCAAGGCGTTCTTAACTGGCATAATTGACATGCTGGCTTTGCTTTTCCTTCTTCTTCAAAAAATAACGACCAAGAAGGATTTGAGCGATCTGCTAACAACTGGCTGAAGAGTCCTTAAAGCGCTACGTACCTCTAGGCGTCTCTTTTGTGAGTAAGCTGTTTTATATTATAGGTGAAGAACAAATTTTCCACATGCTTGTGCCTGCTTTAGATGTCCCTTGACCTCGAGATTTGAAAAAACACCAAAAAGGTGCTGGTTACCCTGCATGTGATATGTGATTACA…	ARS1415.2	14	317600	318000	29.42	0.3	1	GAACAAATTTT	0	317818
TCTGGAATACTGTTCAAACTATGAGTGGAACGTTGGGAATGTTGTGTTATCGTTGAGGTAGAATTGTTTCGTGAAAGCTCTTTTGGTAGAGACGGATGGGAGATCGTGCCTGGAAGTGACAAAGCCTTCTTGGAAGAGGCGAAGCTTTGTTCAAAAGGATTGGGTTCTAAATCGAAAGTTGAAACAGTACTTGGTTGTCTCGAGCGTTCCTCGCTTGACATAATGATTAAGCAGGGTCTAGAGACTGGGCAGGTGTATTTGGAATGCAGAAATTGAAATGAAAAGAATGAAATAAAAATAAAAATCCACGAATTGATTAAGGAACTTATCAAATAATAGAGATCGGTAAAAAGATAGGAATCTAATAAGTGGAAAACTCACTTGAATAATAAAAGAGTT…	ARS1415.3	14	319600	321600	29.42	0.3	2	TAAAAATAAAA	1	321431
AATTATACTGAAATGGGCTCTAATATCATTGAAAATGTGCCGTGGGATAGTCAGATACTTACTTGCATGTGCATGCTATTACATGAATATGAATCAAGAAAGGAGAAACGCCACACCGCATGGGGCAGCTCGACCACATATATGCTAAATGGACCGGCAGGATTACTGATGTAAACCCATTTGCATTTACTTGTGTTTTTTCCTGTTACTATTTAGTCATAATACCGCTAAGAAGCATATAAATATTCAAAGAGAAATATTGTCGTACACCATTAATTTTTCAATAACTCTTAAATACGTTTAGAATGTCACAAGTTTTCCTCACAAGTTTTCCTCTATTATGTAATGTTCCCTATACTACTTTATTCCTACAGTAATAATGTTGACTATCTATTCCTT…	ARS1415.5	14	325200	325600	29.42	0.3	1	AAATACGTTTA	0	325171
TCTGCTTGATCCAACAACTTTAATCCTCGTACCAACTTGCTCATTTCCACAGGATTGGCTGGCTCCACAGCAACACGAACGATTGGCGTAAAATGGAAATTGACGCCCGCTAGATTGACGCCTTGTACGCCCTTCTCTATCAACGTACCACTCTTTAAAACTTTACCGGCCAGACCACGAATACCGACTATATTTCCTGATGGACAAACGTCCAAAGGAACCAATTCCTTACCCATAAACAAATATAAATGCGTAATAATCGCAGTTTCAATATGCTCCTCTGGACATTTTGGATCATATTTTGGACCCAATACCGAAATCTCCTGACCAACTCTTAGTGTGCCACTGTATATTCTTGCAAATGCTACCAAGCATTCTTCCTTTTCGTCAAAAATATCA…	ARS1415.6	14	328000	328400	29.42	0.3	1	GATCATATTTT	0	328252
AAAGTGTATTCAGGGTGAATAAAGCGAAGAATATTAAAATTAAAAACTTAATAGTATTCCTGAACCCAATGGATACCCATTCTGTCAATGTATGTTTGTTTTGGACCAGCTGCGAGCGGTGGGTGGGGGTTGGCGACCCAGAGCCATATTGGCTTCTGTCCCTGTTTTCGGTACTATTTGTATGGTTTTCGTTGAAAGTACTAATATTAGCATCATCAATTCTGCGTTCCTCCAATGGCTCATTTATTGAGTTGTTGTAAAACAAGAGATACCAATCTAATATTGCCCCAATAAAAAATGAAAACGAAGTCCACAAATATGTAAACGTGCCCACAAAGCCGATTCTTTGCCTAGTGTATTTAATTAGATAGGTCAATGCTAGATTGAACAACGTCAAAA…	ARS1417.2	14	411200	411600	42.3	0.3	4	AAAAAATGAAA	1	411481
AGAGGCTGAGAACCCTAGATAATTGGTACCGGTGATCACCTCCAGTTTGCACATACTATATATCTTCATGTAATACTACATATGTCATAACTTCAATAACTCATACAAGTCATCTGCTACTATGCTTTGCCGTTTCTACTATCCGTGAAGCGTGACCGGCCCTTCTCACCCCCCGTGTTACGCAAAGAACAACAAGAGGTCGAGACAACCAACCGGAACGACTAGAAGAGAGGCTGTTACGTTTCCTGTTTGTTCACGCTCAACATCTTCCATTGCTGTAAACTGCATCCAGTAAAATTAATAGTTATTAGCGTACTATGTCTGCCTTTGTCAGGGTGGTTCCAAGAATATCCAGAAGTTCAGTACTCACCAGATCATTGAGACTGCAATTGAGATGCT…	ARS1420.0	14	491200	491600	37.98	0.3	1	TAAAATTAATA	1	491497
TATTAGTAAAAGCCATCACTGTTGCGGCTAAGAGGGTGCCAGATGCCAATGCCTACTGGTTACCTAATGAGAACGTTATCCGTAAATTCAAGAATGTCGATGTCTCAGTCGCTGTTGCCACACCAACAGGATTATTGACACCAATTGTCAAGAATTGTGAGGCCAAGGGCTTGTCGCAAATCTCTAACGAAATCAAGGAACTAGTCAAGCGTGCCAGAATAAACAAATTGGCACCAGAGGAATTCCAAGGTGGGACCATTTGCATATCCAATATGGGCATGAATAATGCTGTTAACATGTTTACTTCGATTATCAACCCACCACAGTCTACAATCTTGGCCATCGCTACTGTTGAAAGGGTCGCTGTGGAAGACGCCGCTGCTGAGAACGGATTCTCCT…	ARS1420.1	14	492400	492800	37.98	0.3	1	TAACATGTTTA	0	492742
AGCGGGCAGTTTCAGGTTCTAGGAGCGTTCTCCGAAGGAAGTCCTTCTGCCGCTGTTTTTCACCCGTTGGCCGAAGCGTTGAGAAACAGCCAAATTTTCTGATTCATAGGAAATTTTTAAAGGAGGTTTGGGTGTGTATAGTGTACGGATTGAATATGTCAAGGATGCAAACACAGCAGCGAAAATAAAGTTCAGTTGCATAAATTAGAGTGAACATTGCGGGGTGTTCAAAATCATAAAGGTCAGATGATCAAACGCATGAGGAAGAGTAAAATAGGGAATGCACGGTGATTAAATATTATATATGAAAGACAGTTATATATGTACTTCGTGACATAGATTCGGACGACAATAGAATGAAAGGAAAGCAGCTCATATGACTGGCTGCAGCTTAGCCAT…	ARS1420.2	14	495200	495600	37.98	0.3	1	TAAATATTATA	1	495547
TCTTGCTTCCATTTGTCATTCGTCATTCCAGCTCTATTTACCTGCCCACGCTTCGATTTCGAGGTTTACTTACTGTAATCTCAAGAAACATACACATTTCCACCCCTCATAAAATGTTGCCTCTTTCAATTGAGCAGAGAAGACCTTCCCGCTCCCCCGAATACGATCAGTCTACTTTATCAAATTATAAGGACTTCGCAGTTCTTCACACCGATTTAAACCTGTCTGTTTCCTTCGAAAAGTCAGCCATTTCAGGGAGCGTTACATTCCAATTGAAAAAACTGCACGAAGGTAAAAATAAATCGGATGAATTACATCTGGATACATCCTATTTGGATGTCCAGGAGGTTCATATTGATGGTTCCAAGGCAGATTTTCAAATTGAGCAAAGAAAGGAGC…	ARS1421.1	14	542800	543200	33.08	0.38	1	TAAAAATAAAT	1	543258
TGATCGGTGCTTCTGCCGTCAGCGTTTTCGGACATGCATCATTGATGGAAAAACCCATCGAAACTGTATTTGATGAAGAAACTGTTTGAACACTCCTACAAGTGTTGGGAAAAGGAGTCATTCTTTTCTATTGTGTATTTTACTCTTCTTCAATATTTAGTTAATTCTTGTCTTTTATTCTCTTTCTCCGTCAACATTAGTATTTAATTGTATACAGACACCATTCATAATTGCAGTTAGCTTCTCTGTTCTTTCTCATTCCTAGGATTTACAATGCAGTCTTACCTTATTTGTTTATGTTTTTTTCGTTTATCAAGCGTGCAATCAATTACTGAAGATTCACGTGCCAAAACGTAAAAATAATAATAACATAACCCGAGAGAGGCAAGATTAGAATCA…	ARS1421.2	14	545600	546000	33.08	0.38	1	GTTTATGTTTT	0	546080
AAGAAATATAAGGAATTCTCGGATTAATTACTTTTCTCGAAAGGGGATTCCGAACACCTACCGGAAAAAAATAGCAGCCCTTAAGGGGAGAGTACGGCTCTTGGCATGACGGGAGGCAGGACAGCACTAAAGGCAGACTAGTCACTGAGCGCTCCAAGTTGGGTATGATAGTATCTTCAAGTTTTGGTCGAGTAGCTATTCCTCTTCTTCAAAGCCACTTACGCTTCGCCCAATAATGTCATGATTTACAAATAAACCTTCCTCTCCGAACCCTTAAAAGTAGGCAAATTGAGAAAATTTTTTGCTCGTCTTTTTTTCTCTCGTTTCGATTACCTTATTGGGAACTTCTCGAAGAACTCGGCGAAGAGGTCCAGAGGAAGATTACTGACTATCATCAAG…	ARS1421.3	14	547600	548800	33.08	0.38	4	GAAAATTTTTT	0	547761
ATAAGCTTCCTAAAAAGATAAGGCTTGGAAGCATTACAGAAAACGATATGAATCTGAAAACTTTCAAAAGACATAGGGTTTTGGGCAAACCTTCTTCGGCTAAGAAACCAGCAGGTGCACACAGAATCAGTATTGTCTCCAAAATTTCTCCACCTACGGCAATGACCGATTCTTTGGACAGGAATGAATTTTCGTCAGAAACTTCTACATCAAGAGAAGCTGATGAGAATGAAAATTATGTGATTAGCAAAGTCAAAGATATCCCGAAAAAAGTGAGAGATGGGGAGTCTGCTAAATATTTTATCGATGAAGAGAATTTTACGATGGCAGAGTTGTGTAAGCCAAACTTTCCTATTGGTCAAATATCTGAAAACTTTGAAAAATCTAAAATGGCAAAAA…	ARS1422.0	14	555600	556000	45.84	0.58	1	TAAATATTTTA	1	555841
GGCTGCTCCGATTCGCGTTACAACGAAAACTGTTTAGGTGTCTTGCCCGGCGAAGTGTTCACTTGGAAAAATGTTGCTAACATATGTCACTCAGAGGATTTAACTTTGAAGGCCACTTTAGAGTTTGCCATTATTTGTCTAAAAGTTAACAAAGTTATTATTTGTGGCCACACTGATTGTGGTGGTATAAAGACATGTTTAACTAACCAAAGGGAAGCCTTACCAAAAGTTAACTGTTCTCATCTGTACAAGTACTTAGACGATATTGACACCATGTACCATGAAGAGTCACAAAATTTGATCCATTTGAAAACGCAACGTGAAAAATCTCATTACCTGTCGCACTGTAACGTCAAAAGGCAGTTTAATAGGATTATTGAAAACCCTACTGTGCAAACT…	ARS1422.2	14	560000	560400	45.84	0.58	2	AAAATTTGATC	1	560270
CAGGAACCCGGCTGGTTCCACAGGACTTTTCTTTCTTTAGGGAAAGGTTGTGAAAATGACAACCAAAAAGTCGCGACGCCAAATATCAAAAACCTAGATGATATTACTTCGTCTGCCAAACACCTCCTTTCCCTCTATCCAGCCCTTATTTTTTTTCCAAGAGCTTCATATGCACGCCCGAATCATTTCGAATCGCGTACGTGGCAGGTTGTGGCTGGCATCTTTCCCAAAAGGAAACGGACCAATACCACGCATCCCCGAGCTCTTGGTCTTTCTTTATCTTGCATAGCCCAAAAAATAAAATGGGGCGGGAAAAAGGGGGCATATCAGAGCATCGGGAACTTCTTTCAATGCAATATATATGGCACATATAAAAAATTCTGGCTTCATTATGTTAGG…	ARS1424.1	14	605200	605600	30	0.55	3	AAAAAATAAAA	1	605198
TCTTTTTCTGGTCATCTTGCTTTCCTTGCCTTGTCATTAACAGAGCTAAACTGTGTTGAGGAAGTGGTCTTTTAAATTTTCAAGGTCGCGGCCCGTGCATTGCGCGGCTGGATGTCTTTTAGGGGAGCGATGCGCTTGCACAAAAGAATAGCCTTGATTTCCGCTATTAATGGGTATATTCTTCTAACAATTTGAGTTTTTTCTCCACTTGTTTCTTTCTTCTTTCTCTTTTCCATTCACATTTTGCTTTACTTTTCTGGATAATATATATGTGCATATATATATATCCATTTAAATATATATATATATATATCTTTTGTCCTCCTCTCCAGTTACTTTTGCGCCAGAAATTCCTTCTTCTTTTCAATCTAATAGAGAAGGGTAGATAGTGTGGTGCAA…	ARS1424.2	14	606000	606400	30	0.55	3	TAAATATATAT	1	606163
TCCTCATATTCCTCTGTTGATAATTAGAGGTTAAAAATTAGTATTAATGAAGAAATAAGTACTGATCTTCTTATACTAAATAAGAGATGTATATAAAACACACGCTGATTGGTCATATTAATCATGACCAATATAATAGTGATTCCGGTAGTTACTAAACATTGATGTGACGACTCATATTCCTCATATATGTACCTACCATAACATGTTCAACTAATAGGTCTTTAACACAGCTTCAGTATTGTCTGAGCTTCTCGTTTAACATTCCTTCTGCAATAGGCGCAATCACACTTAAACGTATACGAGGTGTACATTAATATACGATGTAAGCATTAGATTGTTACCATAGCAACTCATGTCACTATTAATTACTCTCGTTCCAACAAAACAATTCTTAAA…	ARS1426.0	14	632000	632400	32.16	0.58	1	TAAACGTATAC	1	632397
GTGCAAGATGAGGAATCCTCCACACAAGAATCCCGCGAAAGGCCGTATCCAGTAGAAACAGAGAATGGTGAAACTTCAATAAATAAACGGCCTCAAGGCATTACACGTTACGATTTTCCAACTGTTCCTGCACGCAAATTCGTCCAACCGGAGTCAACTGTACCACTTCCTGCAAGTTCCTCTGAAATTCCGATCAAAGAGGAAAGGCCGCCTAGTCCTCAAGAGGAACTGCTAATAGAGCTTTAATATTGTAGCCTTTTCTATGTATTTGTAAAAAGAAACCTAGCGCTTATAAATATATACATACATATATATATAATTGCTTGTTACGCAACTTATACATATTTCTGTCATTAAACTAGTTTTTAAGGTGAATATTCATAATTTATGTCAGTATTA…	ARS1426.2	14	638800	639200	32.16	0.58	1	TAAATATATAC	1	638901
GTAACGAAGGTTACCAGATATATTTTGATGGATTGGTTACTACTGTATGGTCGGCGCCAAACTATTGTTATCGGTGCGGCAATAAAGCATCTATTCTGGAGCTGTATAGTAAAGATCAATTCTACTTCAACGTTTTCGAAGAGGCACCTGAAAATAAACTGTTGAAAGAGAACAGTATGAACGACAATGCCTTAGAAGATAGCATATCTAATCCGGTAGCCAACAGGAAATTGATTGCAGATTATTTCGAAGACGACTCTGCCTCCGCAGATGGCTCCACGGACCCTGAAATGTACATATTTTCAGATGTATACCAAGCCAGATCTGCTTCTAACAGACATGTTGATTACTTCTTGTAGCTTACTAAACAATAGAAAAGCATTATAGAGACAACGCCAT…	ARS1427.1	14	686800	687200	37.15	0.17	1	GTACATATTTT	0	687050
[truncated: 154 more rows]
