# Supplementary material for: The asymmetric distribution of RNA polymerase II and nucleosomes on replicated daughter genomes is caused by differences in replication timing between the lagging and the leading strand
Source: HighWire-hosted journal article supplement (doi:10.1101/gr.275387.121), 2022-01-18
Supplement: Supplemental_Table_S4.xlsx [file Supplemental_Table_S4.xlsx]

## Sheet: Table_S4_replication timing per
Supplemental Table S4: Replication timing (RT) for lagging (lag) and leading (lead) strands determined from WT and mcm2-3A timecourses from Supplemental Figure S10. "rest" in the "cell cycle expression" column designates genes whose expression is not cell cycle dependent. ND-Not Determined
gene	Chr	promoter start (bp)	replication timing of W strand WT (Vasseur et al.,2016) (min), W strand	replication timing (Raghuraman et al., 2001) (min)	tss coordinate (bp)	closest ARS (Figure 1B)	tss distance from nearest ARS (bp)	transcription and fork directions are	fraction of genes with the same direction of transcription and replication in the ROAD (Replication Origin Associated Domain)	replication of W copy	SAGA or TFIID regulation	RNAPol2 occupancy bulk (Kim et al., 2010)	RNAPol2 occupancy 25min S-phase (Figure S1A)	cell cycle expression	RT_lag_WT (min) (average of two replicates)	RT_lead_WT (min) (average of two replicates)	ΔRT_WT_lag-lead (min)	RT_lag_mcm2-3A (min) (average of two replicates)	RT_lead_mcm2-3A (min) (average of two replicates)	ΔRT_mcm2-3A_lag-lead (min)
YAL069W	1	1	80.9132	40.2561	420	ARS102.0	-330	opposite	ND	lagging	ND	ND	ND	ND	49.5516	55.2907	-5.73909	63.4962	62.7646	0.731633
YAL068W-A	1	37	80.9132	40.2561	600	ARS102.0	-150	opposite	ND	lagging	ND	ND	ND	ND	50.9656	52.9863	-2.0208	63.7217	62.3996	1.32212
YAL067W-A	1	1979	65.5667	38.9099	2550	ARS102.0	1800	same	ND	leading	ND	ND	ND	ND	49.5506	45.0367	4.51387	48.4129	50.4584	-2.04551
YAL068C	1	2668	66.8355	39.1748	2130	ARS102.0	1380	opposite	ND	leading	ND	-2.07463	-1.06357	rest	54.1526	46.5409	7.61177	53.5408	56.5817	-3.04094
YAL067C	1	9760	71.6238	32.2582	9210	ARS103.0	-990	same	0.5	lagging	TFIID-dominated	-0.74356	-1.29216	S	41.2843	43.1039	-1.81966	46.7364	45.3548	1.38159
YAL066W	1	9591	73.2062	31.376	10170	ARS103.0	-30	opposite	0.5	lagging	ND	ND	ND	ND	42.0725	48.2689	-6.1964	48.8697	51.3914	-2.52176
YAL064W-B	1	11546	59.7082	28.5019	12120	ARS103.0	1920	same	0.5	leading	ND	-0.50596	-0.13313	rest	44.0045	45.7766	-1.7721	60.1208	53.5073	6.61357
YAL065C	1	12451	55.9645	28.5019	11910	ARS103.0	1710	opposite	0.5	leading	TFIID-dominated	ND	ND	ND	45.1137	45.2216	-0.107912	61.021	56.1989	4.82215
YAL064C-A	1	14243	59.6052	27.514	13710	ARS103.1	-2490	same	1	lagging	ND	-1.23934	-0.243597	rest	45.7507	43.7421	2.00861	52.031	55.666	-3.63502
YAL064W	1	21025	76.7469	31.7688	21600	ARS103.1	5400	same	0.5	leading	ND	-1.14863	-1.17152	rest	44.4863	42.884	1.60235	49.6134	45.2896	4.32374
YAL063C-A	1	23186	96.0941	32.0923	22650	ARS103.1	6450	opposite	0.5	leading	ND	-0.675127	-1.18523	ND	49.5785	44.4027	5.17584	49.3546	39.7898	9.56482
YAL063C	1	28468	35.7077	34.5143	27930	ARS104.0	-5070	same	0.5	lagging	TFIID-dominated	-0.942835	-0.226704	rest	31.9654	34.4622	-2.49679	0	0
YAL062W	1	30652	30.6397	36.4815	31230	ARS104.0	-1770	opposite	0.5	lagging	SAGA-dominated	0.0363374	-0.224887	rest	37.6559	40.5443	-2.88835	35.1485	34.9763	0.172161
YAL061W	1	32860	38.3075	37.5432	33450	ARS104.0	450	same	1	leading	ND	-0.104984	-0.128097	rest	41.0658	38.2716	2.79426	41.6379	34.9977	6.64027
YAL060W	1	34596	38.4561	37.775	35160	ARS104.2	-640	opposite	0	lagging	SAGA-dominated	0.595873	0.596111	rest	38.3031	35.6439	2.65921	37.7586	35.0002	2.7584
YAL059W	1	36044	36.3387	37.7266	36630	ARS104.2	830	same	0.666667	leading	TFIID-dominated	ND	ND	ND	34.9564	38.0719	-3.11555	32.6658	33.9772	-1.31143
YAL058W	1	36908	37.1283	37.561	37470	ARS104.2	1670	same	0.666667	leading	TFIID-dominated	-0.343252	-0.210011	rest	37.5162	36.7794	0.736794	41.2958	33.8374	7.45833
YAL059C-A	1	37418	37.3578	37.6561	36870	ARS104.2	1070	opposite	0.666667	leading	ND	ND	ND	ND	34.8575	37.9831	-3.12563	32.6658	33.8453	-1.17948
YAL056W	1	38716	38.6828	37.141	39300	ARS105.0	-2100	opposite	0	lagging	TFIID-dominated	0.0539564	0.0597797	rest	39.3935	40.2585	-0.864975	37.5509	44.3674	-6.81651
YAL055W	1	41660	31.5158	35.8535	42240	ARS105.0	840	same	1	leading	TFIID-dominated	-0.188752	-0.42019	rest	38.5565	38.0107	0.545841	40.0929	45.3497	-5.25682
YAL053W	1	45260	44.4753	34.4489	45840	ARS105.2	-760	opposite	0	lagging	SAGA-dominated	ND	ND	ND	39.5186	37.476	2.04266	44.5314	42.3574	2.17403
YAL054C	1	45568	44.4753	34.5928	45030	ARS105.1	30	opposite	0	leading	ND	-0.874335	-0.417603	rest	37.6253	37.4519	0.173338	40.646	38.7947	1.85128
YAL051W	1	48012	45.449	34.1247	48600	ARS105.2	2000	same	nd	leading	TFIID-dominated	-0.295734	-0.188158	rest	41.6339	40.9354	0.698441	46.466	46.8867	-0.42072
YAL047W-A	1	54084	41.4475	34.8469	54660	ARS106.0	-7940	opposite	0.75	lagging	ND	ND	ND	ND	41.8946	42.5675	-0.672896	51.4491	48.8624	2.58672
YAL048C	1	55342	38.8119	34.8622	54810	ARS106.0	-7790	same	0.75	lagging	TFIID-dominated	ND	ND	ND	41.7314	42.0625	-0.33115	48.6071	45.5573	3.04983
YAL046C	1	57918	38.3844	34.6549	57360	ARS106.0	-5240	same	0.75	lagging	TFIID-dominated	-0.225627	0.160128	rest	41.5007	41.781	-0.28024	48.2916	45.0531	3.23845
YAL045C	1	58296	36.4536	34.5632	57750	ARS106.0	-4850	same	0.75	lagging	TFIID-dominated	ND	ND	ND	41.031	41.8831	-0.85217	48.0369	46.4898	1.54715
YAL044C	1	58982	34.3563	34.4596	58440	ARS106.0	-4160	same	0.75	lagging	SAGA-dominated	0.369706	0.504944	rest	39.7213	41.4122	-1.69087	45.6228	45.5376	0.0851415
YAL042W	1	60778	36.6614	33.867	61350	ARS106.0	-1250	opposite	0.75	lagging	TFIID-dominated	ND	ND	ND	39.5721	40.7851	-1.21296	46.9444	42.4765	4.46794
YAL043C	1	61590	39.2424	33.867	61050	ARS106.0	-1550	same	0.75	lagging	TFIID-dominated	-0.53896	0.458432	rest	39.1899	41.6685	-2.4786	39.9166	44.703	-4.78638
YAL042C-A	1	62108	41.7505	33.7541	61560	ARS106.0	-1040	same	0.75	lagging	ND	ND	ND	ND	40.2246	43.7317	-3.50703	41.5896	44.1086	-2.51904
YAL041W	1	62290	41.7505	33.4717	62880	ARS106.0	280	same	1	leading	TFIID-dominated	0.103998	0.25407	rest	31.0799	36.3378	-5.25791	36.064	36.2677	-0.2037
YAL039C	1	70110	35.9523	33.6731	69570	ARS106.2	170	opposite	0	leading	TFIID-dominated	-0.258627	0.185726	rest	35.8669	32.0403	3.82657	32.9146	29.5643	3.35034
YAL038W	1	71178	35.0081	34.4242	71760	ARS106.3	-1240	opposite	0	lagging	SAGA-dominated	1.75571	2.30778	rest	27.8814	32.62	-4.73856	29.7235	30.0076	-0.284101
YAL037W	1	73434	38.6935	36.0517	74010	ARS106.3	1010	same	0.466667	leading	SAGA-dominated	ND	ND	ND	33.7863	31.5792	2.20708	33.2727	33.4803	-0.20753
YAL037C-B	1	73800	39.1267	35.678	73260	ARS106.3	260	opposite	0.466667	leading	ND	ND	ND	ND	33.316	28.0877	5.2283	29.9877	29.9408	0.0468886
YAL037C-A	1	74018	39.1189	35.678	73470	ARS106.3	470	opposite	0.466667	leading	ND	2.01987	0.962258	ND	28.6574	27.8963	0.76114	34.5159	32.0242	2.49177
YAL035W	1	75882	37.0399	37.9254	76470	ARS106.3	3470	same	0.466667	leading	TFIID-dominated	ND	ND	ND	39.6901	38.7472	0.942851	45.0602	41.7619	3.29825
YAL036C	1	76710	37.042	37.5796	76170	ARS106.3	3170	opposite	0.466667	leading	TFIID-dominated	0.177773	0.456692	rest	38.6253	39.2468	-0.621496	37.7723	41.1254	-3.35315
YAL034W-A	1	79194	39.3082	39.0721	79770	ARS106.3	6770	same	0.466667	leading	TFIID-dominated	-0.122252	0.18516	rest	43.1978	40.1218	3.07597	49.5694	47.4865	2.08285
YAL034C-B	1	80342	41.7526	39.0604	79800	ARS106.3	6800	opposite	0.466667	leading	ND	ND	ND	ND	42.0629	39.8024	2.26044	51.0704	46.203	4.86743
YAL033W	1	82194	46.0722	38.1203	82770	ARS106.3	9770	same	0.466667	leading	TFIID-dominated	ND	ND	ND	44.0222	40.241	3.78121	47.776	44.3721	3.4039
YAL034C	1	83086	47.5782	38.1203	82530	ARS106.3	9530	opposite	0.466667	leading	ND	-0.355341	0.305589	rest	41.2016	39.8363	1.3653	44.2048	42.7305	1.47431
YAL031W-A	1	84169	47.0356	36.6458	84750	ARS106.3	11750	same	0.466667	leading	ND	ND	ND	ND	42.1623	41.9129	0.24939	48.3313	45.7871	2.54413
YAL032C	1	85006	49.1283	36.6458	84450	ARS106.3	11450	opposite	0.466667	leading	TFIID-dominated	ND	ND	ND	43.522	40.749	2.77304	47.2519	48.6149	-1.36297
YAL030W	1	86762	54.4954	34.7159	87330	ARS106.3	14330	same	0.466667	leading	TFIID-dominated	ND	ND	ND	41.9756	41.8658	0.10983	45.3677	46.3613	-0.993551
YAL031C	1	87574	56.6457	34.7159	87030	ARS106.3	14030	opposite	0.466667	leading	SAGA-dominated	-0.435277	-0.111429	rest	41.1455	41.5992	-0.453746	46.1867	45.2818	0.904924
YAL028W	1	92354	60.6547	33.1649	92940	ARS106.3	19940	same	0.466667	leading	TFIID-dominated	ND	ND	ND	45.1532	44.3955	0.75774	50.4969	52.2659	-1.76902
YAL029C	1	93014	59.8861	33.1169	92460	ARS106.3	19460	opposite	0.466667	leading	TFIID-dominated	0.0329231	0.477349	rest	44.8393	42.1453	2.69393	52.0923	51.3265	0.765838
YAL027W	1	94106	59.3929	33.3528	94680	ARS107.0	-18320	opposite	0.857143	lagging	TFIID-dominated	-0.0608769	-0.282055	rest	46.6219	45.1823	1.43964	57.1636	54.8855	2.27807
YAL026C-A	1	96323	62.6822	33.4521	95790	ARS107.0	-17210	same	0.857143	lagging	ND	ND	ND	ND	46.8017	47.7138	-0.912065	58.7741	57.2717	1.50243
YAL026C	1	100197	54.8927	32.8778	99660	ARS107.0	-13340	same	0.857143	lagging	ND	-0.22046	0.0647712	rest	44.375	46.4664	-2.09141	56.0343	57.5685	-1.53418
YAL025C	1	101670	51.2139	32.5144	101130	ARS107.0	-11870	same	0.857143	lagging	TFIID-dominated	ND	ND	ND	37.5953	39.6184	-2.02311	38.6003	44.7309	-6.13056
YAL024C	1	106486	46.3871	32.7446	105930	ARS107.0	-7070	same	0.857143	lagging	TFIID-dominated	-0.459766	0.468591	rest	43.4595	42.6614	0.798109	51.0386	50.9874	0.0512152
YAL023C	1	109166	40.1833	33.5465	108630	ARS107.0	-4370	same	0.857143	lagging	TFIID-dominated	0.405802	1.21855	rest	41.2642	40.4909	0.773257	48.0629	44.2777	3.7852
YAL022C	1	110966	38.6485	34.053	110430	ARS107.0	-2570	same	0.857143	lagging	TFIID-dominated	-0.139127	-0.156097	M	39.2152	40.0693	-0.854094	41.6513	43.5148	-1.86343
YAL021C	1	113934	36.9057	33.7001	113400	ARS107.0	400	opposite	0	leading	ND	-0.390663	0.422469	rest	40.5955	40.162	0.433512	44.8687	51.2764	-6.40764
YAL019W-A	1	113750	36.9057	33.4769	114330	ARS107.1	-270	opposite	0	lagging	ND	ND	ND	ND	40.5595	39.4793	1.08019	46.5473	43.1776	3.36979
YAL019W	1	114419	38.2413	32.9167	114990	ARS107.1	390	same	0.5	leading	TFIID-dominated	ND	ND	ND	38.399	38.3031	0.095812	40.4047	36.498	3.90667
YAL020C	1	115182	38.4056	33.2136	114630	ARS107.1	30	opposite	0.5	leading	SAGA-dominated	-1.00983	0.498272	rest	39.4725	40.781	-1.30843	44.2553	47.2054	-2.95006
YAL017W	1	119362	32.4903	30.078	119940	ARS107.2	-5060	opposite	0	lagging	TFIID-dominated	ND	ND	ND	27.1704	30.5374	-3.36703	28.9967	32.1379	-3.14125
YAL018C	1	120041	32.3305	30.2317	119490	ARS107.1	4890	opposite	0.5	leading	ND	-1.07383	-0.688882	rest	33.0579	34.2157	-1.15786	32.9506	32.1542	0.796386
YAL016W	1	124298	31.9723	30.1452	124860	ARS107.2	-140	opposite	0	lagging	TFIID-dominated	ND	ND	ND	31.717	27.8366	3.88037	35.451	30.5559	4.89514
YAL016C-B	1	124992	30.1272	30.1452	124440	ARS107.2	-560	same	0	lagging	ND	ND	ND	ND	27.6932	30.9294	-3.23617	28.8941	33.696	-4.80189
YAL016C-A	1	125569	29.8607	30.1997	125010	ARS107.2	10	opposite	nd	leading	ND	ND	ND	ND	28.7767	27.4813	1.29543	29.2686	35.0644	-5.79586
YAL015C	1	128574	31.4464	30.0754	128040	ARS107.3	-160	same	1	lagging	TFIID-dominated	-0.185377	-0.518299	rest	36.1076	37.068	-0.960387	37.7935	39.4066	-1.61318
YAL013W	1	128738	31.4464	29.8218	129300	ARS107.3	1100	same	0.5	leading	TFIID-dominated	ND	ND	ND	39.0298	38.4961	0.533654	40.7893	45.8519	-5.06261
YAL014C	1	129574	32.5906	29.8218	129030	ARS107.3	830	opposite	0.5	leading	TFIID-dominated	-0.294127	0.201825	rest	39.9917	35.9779	4.01374	44.6425	49.1724	-4.52987
YAL012W	1	130202	34.349	29.2767	130770	ARS107.4	170	same	1	leading	TFIID-dominated	0.583706	1.21051	rest	39.0494	36.0865	2.9629	44.0871	40.7536	3.33352
YAL011W	1	131698	33.7255	28.6189	132270	ARS107.5.0	470	same	1	leading	TFIID-dominated	-0.403314	0.148974	rest	38.0103	38.4948	-0.484453	35.9906	40.3839	-4.3933
YAL009W	1	135322	41.9852	27.2685	135900	ARS107.5.1	-2900	opposite	0.5	lagging	TFIID-dominated	ND	ND	ND	32.4815	32.8955	-0.413939	32.6241	34.5777	-1.95358
YAL010C	1	136206	48.1439	27.2685	135660	ARS107.5.1	-3140	same	0.5	lagging	TFIID-dominated	-0.477527	-0.599834	rest	35.8884	39.3417	-3.45331	38.6869	37.0383	1.64861
YAL008W	1	136362	48.1439	26.9073	136950	ARS107.5.1	-1850	opposite	0.5	lagging	TFIID-dominated	-0.0321269	-0.544566	rest	33.2569	32.9984	0.258519	37.8049	40.2868	-2.48193
YAL007C	1	138950	43.3353	26.5757	138420	ARS107.5.1	-380	same	0.5	lagging	TFIID-dominated	0.0138731	0.0618477	rest	38.7748	34.4968	4.27799	42.9405	37.9448	4.9957
YAL004W	1	140261	R	25.8629	140850	ARS107.5.2	1050	same	1	leading	TFIID-dominated	ND	ND	ND	35.5775	37.2965	-1.71897	33.6213	40.2008	-6.57951
YAL003W	1	141675	30.8039	24.9373	142260	ARS108.0	-740	opposite	0.5	lagging	TFIID-dominated	ND	ND	ND	26.9163	29.2384	-2.3221	30.4544	31.1108	-0.65648
YAL005C	1	142182	30.481	25.2873	141630	ARS108.0	-1370	same	0.5	lagging	TFIID-dominated	0.82554	0.789446	rest	38.0055	35.6976	2.30791	39.6083	33.5062	6.10213
YAL002W	1	143098	31.598	23.6716	143670	ARS108.1	-530	opposite	0	lagging	TFIID-dominated	0.0449669	-0.528081	rest	23.5113	25.7797	-2.26845	24.6964	25.3886	-0.692229
YAR002W	1	151714	27.8243	18.2369	152280	ARS108.5	-720	opposite	0	lagging	TFIID-dominated	ND	ND	ND	28.3397	27.2289	1.11072	30.9279	29.0899	1.838
YAL001C	1	151710	27.8243	18.2825	151170	ARS108.4	170	opposite	0	leading	TFIID-dominated	-0.469803	-0.313152	rest	26.9666	28.0619	-1.09528	27.6364	26.0892	1.54718
YAR003W	1	154434	25.9993	19.5324	155010	ARS109.0	410	same	0.5	leading	TFIID-dominated	ND	ND	ND	26.8296	25.971	0.858588	25.5099	24.6204	0.889535
YAR002C-A	1	155262	27.149	19.1542	154710	ARS109.0	110	opposite	0.5	leading	ND	0.252206	-0.0457154	rest	25.3235	26.4695	-1.14603	25.6696	27.5614	-1.89178
YAR008W	1	158362	72.5769	24.0435	158940	ARS109.4	-60	opposite	0.5	lagging	TFIID-dominated	ND	ND	ND	27.0444	29.215	-2.17064	0	0
YAR007C	1	159198	0	23.4622	158640	ARS109.4	-360	same	0.5	lagging	TFIID-dominated	-0.281877	0.207918	G1	21.6554	22.3798	-0.724447	19.0309	22.1166	-3.08576
YAR015W	1	168754	31.6591	17.1052	169320	ARS109.6	2720	same	0.5	leading	SAGA-dominated	ND	ND	ND	26.4508	27.2744	-0.82367	27.3421	23.6684	3.67363
YAR014C	1	169526	33.1702	17.1052	168990	ARS109.6	2390	opposite	0.5	leading	TFIID-dominated	-0.260077	-0.0286567	rest	26.7104	27.4371	-0.726742	27.4929	25.4522	2.04072
YAR018C	1	172222	26.4608	14.7525	171690	ARS110.0	-3310	same	1	lagging	TFIID-dominated	0.105811	-1.23404	M	24.1277	23.4064	0.72132	22.2544	25.442	-3.1876
YAR019W-A	1	174495	22.7784	16.0757	175080	ARS110.0	80	same	0.5	leading	ND	ND	ND	ND	8.80684	10.0551	-1.24831	10.2007	10.0221	0.178524
YAR019C	1	175678	28.8946	16.0757	175140	ARS110.0	140	opposite	0.5	leading	TFIID-dominated	-0.744803	-0.592252	rest	19.5435	19.4903	0.0531559	15.582	17.4924	-1.91041
YAR020C	1	177520	32.4982	18.3706	176970	ARS110.1	-430	same	1	lagging	TFIID-dominated	-1.07898	-0.835584	rest	16.0056	19.0033	-2.99769	16.0699	17.1551	-1.08521
YAR023C	1	180317	47.7515	21.6972	179760	ARS110.1	2360	opposite	0	leading	TFIID-dominated	-0.398827	-0.54341	rest	26.0794	24.9334	1.14602	23.4182	22.4915	0.926692
YAR027W	1	183263	35.7411	26.0365	183840	ARS110.2	-6360	opposite	0.142857	lagging	TFIID-dominated	0.0948731	-0.575036	rest	26.8947	29.4649	-2.57021	32.7596	31.2652	1.49441
YAR028W	1	184385	43.6514	27.0882	184950	ARS110.2	-5250	opposite	0.142857	lagging	SAGA-dominated	ND	ND	ND	27.9861	30.9597	-2.97357	35.0868	32.3475	2.73927
YAR029W	1	185814	55.4534	27.6179	186390	ARS110.2	-3810	opposite	0.142857	lagging	ND	-0.621877	-0.707389	rest	34.0903	32.7258	1.36448	43.379	41.7966	1.58242
YAR031W	1	186329	51.2484	27.8348	186900	ARS110.2	-3300	opposite	0.142857	lagging	ND	-0.272227	-0.747101	rest	41.185	39.5916	1.59334	49.061	46.9237	2.1373
YAR030C	1	187346	38.752	27.8348	186810	ARS110.2	-3390	same	0.142857	lagging	TFIID-dominated	ND	ND	ND	37.9983	33.5994	4.39887	45.0443	47.9048	-2.86051
YAR033W	1	187600	R	28.3122	188190	ARS110.2	-2010	opposite	0.142857	lagging	TFIID-dominated	-0.0363769	-0.516931	rest	43.5459	40.9989	2.54692	40.7665	38.5409	2.22559
YAR035W	1	189490	37.3451	28.6351	190080	ARS110.2	-120	opposite	0.142857	lagging	SAGA/TFIID	-1.7169	-0.804394	rest	37.0309	35.9937	1.03721	40.0168	39.8337	0.183078
YAR042W	1	192082	37.9686	28.8768	192660	ARS110.2	2460	same	0.5	leading	TFIID-dominated	ND	ND	ND	36.8208	36.4527	0.368056	42.3478	40.1454	2.20243
YAR047C	1	202279	0	36.0489	201720	ARS110.2	11520	opposite	0.5	leading	TFIID-dominated	ND	ND	ND	0	0		0	0
YAR050W	1	202893	0	37.5003	203460	ARS111.0	-11519	opposite	ND	lagging	TFIID-dominated	-1.01024	0.142427	rest	0	0		0	0
YAR053W	1	207857	0	39.5975	208440	ARS111.0	-6539	opposite	ND	lagging	TFIID-dominated	ND	ND	ND	0	0		0	0
YAR060C	1	217982	R	51.0053	217440	ARS111.0	2461	opposite	ND	leading	TFIID-dominated	ND	ND	ND	0	0		0	0
YAR064W	1	219688	R	48.6412	220260	ARS112.0	-2711	opposite	ND	lagging	SAGA/TFIID	ND	ND	ND	0	0		0	0
YAR066W	1	220539	0	47.6492	221100	ARS112.0	-1871	opposite	ND	lagging	SAGA-dominated	ND	ND	ND	0	0		0	0
YAR068W	1	221896	R	46.3693	222480	ARS112.0	-491	opposite	ND	lagging	TFIID-dominated	ND	ND	ND	0	0		0	0
YAR069C	1	224794	0	45.2492	224250	ARS112.0	1279	opposite	ND	leading	TFIID-dominated	ND	ND	ND	0	0		0	0
YAR070C	1	225352	R	44.8716	224820	ARS113.0	-1380	same	ND	lagging	TFIID-dominated	ND	ND	ND	0	0		0	0
YAR071W	1	224950	R	44.0628	225540	ARS113.0	-660	opposite	ND	lagging	TFIID-dominated	ND	ND	ND	0	0		0	0
YBL113W-A	2	145	0	41.267	720	ARS200.0	120	same	0.5	leading	ND	ND	ND	ND	0	0		0	0
YBL113C	2	3157	R	42.1303	2610	ARS200.0	2010	opposite	0.5	leading	TFIID-dominated	ND	ND	ND	0	0		0	0
YBL109W	2	5289	R	43.637	5850	ARS201.0	-350	opposite	0.5	lagging	ND	ND	ND	ND	50.2614	48.1584	2.10298	46.7253	48.478	-1.75261
YBL111C	2	5508	R	43.2785	4950	ARS201.0	-1250	same	0.5	lagging	TFIID-dominated	-1.81413	-1.5026	G1	0	0		0	0
YBL108W	2	7676	R	43.9378	8250	ARS201.1	850	same	0.5	leading	ND	ND	ND	ND	44.0623	42.6429	1.41941	48.4461	44.5282	3.91787
YBL108C-A	2	8232	38.3895	43.9214	7680	ARS201.1	280	opposite	0.5	leading	ND	ND	-1.23281	ND	49.7392	47.6009	2.13829	54.9348	48.5272	6.4076
YBL107W-A	2	8767	38.22	43.7616	9330	ARS201.2	-70	opposite	0	lagging	ND	ND	ND	ND	36.5775	39.0887	-2.51118	42.2083	45.9919	-3.78359
YBL107C	2	11064	42.9836	43.4836	10530	ARS201.2	1130	opposite	0	leading	ND	ND	ND	ND	35.6428	36.2912	-0.648382	41.1552	42.7427	-1.58758
YBL106C	2	14416	45.3439	41.8387	13860	ARS201.4	-1540	same	1	lagging	TFIID-dominated	-0.387204	-0.22592	rest	39.7219	40.3557	-0.633818	42.336	43.8391	-1.50308
YBL105C	2	18464	46.8089	39.5399	17910	ARS201.4	2510	opposite	0	leading	ND	-0.0319504	0.330031	rest	41.1616	41.7641	-0.602497	45.9088	45.1277	0.781115
YBL104C	2	21808	40.2226	38.0807	21270	ARS201.5.0	-2930	same	0.666667	lagging	ND	-0.395427	0.0545214	rest	40.7725	39.5839	1.18857	44.005	40.8713	3.13374
YBL102W	2	23492	36.7705	37.3839	24060	ARS201.5.0	-140	opposite	0.666667	lagging	TFIID-dominated	ND	ND	ND	38.6863	39.7124	-1.02608	39.5999	42.2185	-2.61863
YBL103C	2	24296	37.841	37.3839	23760	ARS201.5.0	-440	same	0.666667	lagging	TFIID-dominated	-0.290127	0.209425	rest	39.0434	40.4532	-1.40984	38.3439	41.5979	-3.25402
YBL100W-C	2	27926	83.9184	36.6187	28500	ARS201.5.2	300	same	0.5	leading	ND	ND	ND	ND	50.5345	42.2921	8.24236	47.1067	42.447	4.65961
YBL101C	2	29104	0	36.6187	28560	ARS201.5.2	360	opposite	0.5	leading	SAGA-dominated	-0.49771	-0.371511	rest	38.7758	38.5621	0.213675	39.1854	38.2743	0.911084
YBL099W	2	36228	47.6171	36.2997	36810	ARS201.7.0	-590	opposite	0.5	lagging	TFIID-dominated	0.497186	1.79023	rest	37.6335	36.8463	0.787171	38.5338	38.7102	-0.176465
YBL100C	2	37799	45.2238	36.2345	37260	ARS201.7.0	-140	same	0.5	lagging	TFIID-dominated	ND	ND	ND	38.7885	38.8199	-0.0313195	38.3593	42.5749	-4.21558
YBL098W	2	38620	45.6578	36.0107	39210	ARS201.7.1	-1190	opposite	0	lagging	SAGA/TFIID	-0.0689126	-0.123421	M	40.2387	40.1085	0.130201	42.3103	45.4613	-3.1509
YBL097W	2	40284	43.967	35.4074	40860	ARS201.7.1	460	same	1	leading	TFIID-dominated	-0.633349	0.172383	rest	39.7772	40.8164	-1.03925	45.4848	45.8522	-0.367404
YBL095W	2	42644	42.431	34.4896	43230	ARS201.7.2	-570	opposite	0.5	lagging	TFIID-dominated	0.352206	0.535018	rest	39.4983	39.3362	0.162049	40.5776	40.5275	0.0501458
YBL096C	2	43978	35.6249	34.2224	43440	ARS201.7.2	-360	same	0.5	lagging	TFIID-dominated	ND	ND	ND	40.9924	42.4829	-1.49051	40.0282	41.8762	-1.848
YBL094C	2	44593	31.841	33.9422	44040	ARS201.7.2	240	opposite	0	leading	TFIID-dominated	ND	ND	ND	38.8212	39.2384	-0.417191	38.9317	40.7723	-1.84065
YBL092W	2	45044	32.0319	33.0243	45630	ARS201.7.3	230	same	1	leading	TFIID-dominated	ND	ND	ND	36.0221	35.3899	0.632187	35.6552	38.3231	-2.66796
YBL093C	2	45512	32.8334	33.3431	44970	ARS201.7.3	-430	same	nd	lagging	TFIID-dominated	0.173773	0.176242	rest	36.6586	35.438	1.22065	39.3816	36.4337	2.9479
YBL091C-A	2	47672	32.7611	31.9943	47130	ARS201.7.4	-270	same	1	lagging	ND	0.96204	0.691722	ND	37.2952	38.4556	-1.16042	37.6611	41.1385	-3.47741
YBL090W	2	48276	33.1218	30.5168	48840	ARS201.7.5	-1360	opposite	0	lagging	TFIID-dominated	ND	ND	ND	38.3268	37.2396	1.08722	35.7439	35.9301	-0.186198
YBL091C	2	49168	33.4096	30.8881	48630	ARS201.7.4	1230	opposite	nd	leading	TFIID-dominated	-0.568127	-0.467421	rest	39.3737	37.484	1.8897	41.1285	35.6746	5.45395
YBL089W	2	49044	33.4096	30.1514	49620	ARS201.7.5	-580	opposite	0	lagging	TFIID-dominated	ND	ND	ND	38.5546	39.594	-1.03939	34.1061	37.2255	-3.1194
YBL088C	2	60144	32.4998	27.3802	59610	ARS202.0	-2190	same	1	lagging	TFIID-dominated	-0.34037	-0.45079	rest	26.7831	27.0151	-0.231947	26.2632	26.7682	-0.505037
YBL087C	2	61344	30.9672	27.6348	60810	ARS202.0	-990	same	1	lagging	TFIID-dominated	1.31825	0.716923	rest	23.308	20.9019	2.40609	20.5729	19.4612	1.11166
YBL085W	2	63036	28.783	28.4897	63600	ARS202.1	-600	opposite	0	lagging	ND	ND	ND	ND	24.2196	27.3855	-3.16592	25.1013	23.8046	1.29677
YBL086C	2	63264	28.5842	28.2855	62730	ARS202.0	930	opposite	nd	leading	TFIID-dominated	-0.978877	-0.705686	rest	16.7263	14.937	1.78927	12.8899	11.9646	0.925256
YBL084C	2	70064	31.7604	30.9673	69510	ARS202.3	-1090	same	1	lagging	ND	-0.0966269	-0.324461	rest	31.1211	36.8239	-5.70278	27.6501	30.3355	-2.68541
YBL083C	2	70634	31.6179	31.1106	70080	ARS202.3	-520	same	1	lagging	TFIID-dominated	ND	ND	ND	32.4957	37.2478	-4.75216	29.8064	33.4678	-3.66136
YBL081W	2	71060	31.6361	31.4373	71640	ARS202.3	1040	same	0.5	leading	TFIID-dominated	ND	ND	ND	34.6836	37.8952	-3.21157	36.0151	35.6404	0.374674
YBL082C	2	71623	32.349	31.3456	71070	ARS202.3	470	opposite	0.5	leading	TFIID-dominated	-0.825894	0.0487215	rest	35.9718	34.4541	1.51779	36.7192	32.8598	3.85933
YBL079W	2	74684	39.9587	31.6809	75270	ARS202.4	-530	opposite	0.5	lagging	ND	ND	ND	ND	37.5237	35.7883	1.73545	34.7665	35.5379	-0.771378
YBL080C	2	75240	41.722	31.6795	74700	ARS202.4	-1100	same	0.5	lagging	TFIID-dominated	-0.551939	-0.38064	rest	35.6151	36.4537	-0.838598	31.6994	34.7816	-3.08217
YBL077W	2	80394	45.5171	31.8892	80970	ARS203.0	-4030	opposite	0.666667	lagging	TFIID-dominated	ND	ND	ND	41.8591	39.4912	2.36785	45.6758	41.7893	3.88655
YBL078C	2	81264	42.8834	31.8892	80730	ARS203.0	-4270	same	0.666667	lagging	SAGA-dominated	0.724706	0.15216	rest	40.2965	40.682	-0.385448	47.8478	41.9661	5.88174
YBL076C	2	84800	53.3177	32.5167	84270	ARS203.0	-730	same	0.666667	lagging	TFIID-dominated	ND	ND	ND	41.8585	40.9224	0.93604	45.2503	44.033	1.21727
YBL075C	2	86945	45.7493	32.5792	86400	ARS203.0	1400	opposite	0	leading	ND	-0.79027	0.203497	rest	39.2987	39.6769	-0.378123	42.7095	42.6275	0.0820267
YBL073W	2	87143	45.7493	32.4749	87720	ARS203.1	-2080	opposite	0.666667	lagging	TFIID-dominated	ND	ND	ND	41.264	40.1043	1.15974	46.0423	45.5784	0.463924
YBL074C	2	88286	42.6031	32.394	87750	ARS203.1	-2050	same	0.666667	lagging	TFIID-dominated	0.695073	0.104188	rest	39.7693	40.0842	-0.314948	44.7329	43.6087	1.12419
YBL072C	2	89622	43.4444	32.1935	89070	ARS203.1	-730	same	0.666667	lagging	TFIID-dominated	1.96762	1.64305	rest	40.9586	39.1331	1.82555	44.475	46.3785	-1.90345
YBL071W-A	2	89444	43.3282	31.9731	90030	ARS203.1	230	same	1	leading	ND	ND	ND	ND	39.5958	41.4824	-1.8866	43.7818	43.137	0.644794
YBL071C-B	2	90053	43.5007	32.0833	89520	ARS203.1	-280	same	0.666667	lagging	ND	1.19337	-0.818242	ND	40.8579	39.1342	1.72373	43.5159	44.8322	-1.31635
YBL069W	2	90238	43.5007	31.8678	90810	ARS203.2	-590	opposite	0	lagging	SAGA-dominated	0.627061	0.465064	rest	40.6942	38.9788	1.71538	45.1308	43.7296	1.40114
YBL071C	2	91028	43.7961	31.8678	90480	ARS203.1	680	opposite	1	leading	TFIID-dominated	ND	ND	ND	39.0218	41.5232	-2.50138	43.4432	44.673	-1.22974
YBL070C	2	91422	44.1474	31.7717	90870	ARS203.2	-530	same	0	lagging	ND	ND	ND	ND	41.551	39.0478	2.50317	44.9114	44.4587	0.452683
YBL068W-A	2	91291	44.1474	31.6214	91860	ARS203.2	460	same	nd	leading	ND	ND	ND	ND	40.6249	37.3407	3.2842	37.0885	39.4035	-2.31494
YBL068W	2	91844	44.6928	31.5722	92430	ARS203.3	-570	opposite	0	lagging	TFIID-dominated	0.540973	0.0664513	rest	35.2076	39.4901	-4.28246	37.099	36.9627	0.13637
YBL067C	2	96665	49.7692	31.7647	96120	ARS203.5	720	opposite	0	leading	TFIID-dominated	-0.027536	-0.116625	rest	40.4315	37.3412	3.09034	42.7713	41.3947	1.37657
YBL065W	2	99464	56.9569	32.9694	100050	ARS203.6	650	same	0.5	leading	ND	ND	ND	ND	42.0823	42.4045	-0.322151	49.366	45.8848	3.4812
YBL066C	2	100670	60.8363	32.9694	100140	ARS203.6	740	opposite	0.5	leading	TFIID-dominated	ND	ND	ND	41.9634	42.3229	-0.359513	47.596	43.9703	3.62571
YBL063W	2	101370	60.1143	33.9033	101940	ARS203.7	-260	opposite	0.5	lagging	TFIID-dominated	ND	ND	ND	41.7669	40.5113	1.25559	44.1759	47.5151	-3.33926
YBL064C	2	101718	59.1565	33.4105	101160	ARS203.7	-1040	same	0.5	lagging	SAGA-dominated	-0.470752	-0.382779	M/G1	42.8302	41.512	1.31818	51.3432	53.3589	-2.01568
YBL062W	2	104809	60.0274	36.0655	105390	ARS203.7	3190	same	0.666667	leading	SAGA/TFIID	ND	ND	ND	44.1743	46.0383	-1.86403	50.2003	53.7632	-3.56295
YBL060W	2	107186	67.2344	37.5507	107760	ARS203.7	5560	same	0.666667	leading	TFIID-dominated	ND	ND	ND	45.0427	44.7237	0.319016	54.9287	56.1618	-1.23311
YBL061C	2	108014	67.016	37.5507	107460	ARS203.7	5260	opposite	0.666667	leading	TFIID-dominated	0.132823	0.3662	M/G1	45.2673	45.2002	0.0671213	53.7703	54.8788	-1.10844
YBL059C-A	2	111070	69.6363	39.5138	110520	ARS203.7	8320	opposite	0.666667	leading	ND	0.194123	-0.250298	ND	46.3251	45.9701	0.355049	55.716	57.9626	-2.24656
YBL059W	2	110178	66.5522	39.5138	110760	ARS203.7	8560	same	0.666667	leading	TFIID-dominated	ND	ND	ND	45.9792	47.8821	-1.90289	57.9563	56.7818	1.17444
YBL058W	2	110906	69.6363	39.9298	111480	ARS203.7	9280	same	0.666667	leading	TFIID-dominated	0.56554	0.51877	rest	45.2402	48.1599	-2.91969	48.2235	56.7575	-8.53399
YBL056W	2	113138	70.5354	40.2558	113700	ARS206.0	-9700	opposite	0.5	lagging	TFIID-dominated	ND	ND	ND	48.6581	45.5892	3.06893	52.6587	54.6927	-2.03398
YBL057C	2	113950	68.9946	40.2558	113400	ARS206.0	-10000	same	0.5	lagging	TFIID-dominated	0.445248	0.299136	rest	48.9767	45.8487	3.12798	57.48	59.7837	-2.30368
YBL054W	2	117091	75.7661	39.3434	117660	ARS206.0	-5740	opposite	0.5	lagging	TFIID-dominated	ND	ND	ND	47.8631	49.1169	-1.25381	61.3421	58.5769	2.76522
YBL055C	2	117718	77.4359	39.5176	117180	ARS206.0	-6220	same	0.5	lagging	TFIID-dominated	0.10529	-0.142078	rest	48.3853	46.1854	2.19991	55.4786	51.7514	3.72717
YBL053W	2	118837	76.7918	38.6132	119400	ARS206.0	-4000	opposite	0.5	lagging	TFIID-dominated	ND	ND	ND	51.23	49.385	1.84499	58.5363	58.8736	-0.337282
YBL052C	2	122638	65.9432	37.695	122100	ARS206.0	-1300	same	0.5	lagging	TFIID-dominated	-0.0123961	0.099242	G2	46.6926	47.7041	-1.01152	57.2473	57.345	-0.097737
YBL050W	2	124554	68.1874	36.7769	125130	ARS206.0	1730	same	0.75	leading	TFIID-dominated	ND	ND	ND	46.2267	46.0662	0.16053	54.1947	54.8554	-0.660655
YBL051C	2	125342	65.2843	36.7769	124800	ARS206.0	1400	opposite	0.75	leading	TFIID-dominated	-0.0549602	0.266062	rest	49.4155	48.8521	0.563421	54.2736	58.3721	-4.09858
YBL049W	2	126330	62.5923	36.4955	126900	ARS206.0	3500	same	0.75	leading	TFIID-dominated	0.300373	-0.264899	rest	45.3517	46.6243	-1.27258	52.7551	53.8336	-1.07849
YBL048W	2	126801	60.5348	36.4697	127380	ARS206.0	3980	same	0.75	leading	TFIID-dominated	ND	ND	ND	47.1307	45.4841	1.64666	56.9418	54.5966	2.34524
YBL046W	2	131922	56.8128	36.4162	132510	ARS206.2	-90	opposite	ND	lagging	TFIID-dominated	ND	ND	ND	42.2294	39.902	2.32737	47.3719	45.4034	1.96847
YBL047C	2	132718	54.7391	36.4396	132180	ARS206.2	-420	same	ND	lagging	TFIID-dominated	-0.187568	0.713387	rest	42.7156	45.4809	-2.76525	51.0917	54.9009	-3.80922
YBL044W	2	135500	50.3773	35.9395	136080	ARS206.3	-520	opposite	0.5	lagging	ND	ND	ND	ND	39.4236	39.5339	-0.110374	45.3366	45.8452	-0.508574
YBL045C	2	136310	47.9358	35.9395	135780	ARS206.3	-820	same	0.5	lagging	TFIID-dominated	0.0943731	1.12776	rest	38.9444	40.0522	-1.1078	47.1168	46.9077	0.209082
YBL043W	2	136066	47.9358	35.8082	136650	ARS206.3	50	same	1	leading	SAGA-dominated	-1.18875	-0.501368	rest	37.4266	39.6589	-2.23231	43.1946	44.6043	-1.40963
YBL041W	2	140490	48.6758	34.0747	141060	ARS206.5	60	same	1	leading	TFIID-dominated	ND	ND	ND	35.1219	34.2845	0.837422	37.2414	33.399	3.8424
YBL042C	2	140838	48.7252	34.2706	140280	ARS206.5	-720	same	nd	lagging	SAGA-dominated	0.200561	1.5165	rest	37.884	39.7741	-1.89012	45.4349	48.79	-3.35505
YBL039W-B	2	142602	47.9037	33.4522	143190	ARS206.6	190	same	1	leading	ND	ND	ND	ND	37.6102	38.797	-1.18675	38.2917	35.8325	2.4592
YBL040C	2	143422	46.9903	33.4522	142890	ARS206.6	-110	same	nd	lagging	TFIID-dominated	0.332673	0.265807	rest	34.2383	35.1495	-0.911161	30.4777	38.2333	-7.7556
YBL039C-A	2	145533	46.5383	33.1057	144990	ARS206.7	790	opposite	ND	leading	ND	ND	ND	ND	38.3706	32.9997	5.3709	40.2083	35.6127	4.59557
YBL038W	2	145618	46.9407	33.0054	146190	ARS206.7	1990	same	ND	leading	TFIID-dominated	ND	ND	ND	39.2841	38.7688	0.51526	42.9187	44.0711	-1.15242
YBL039C	2	146230	47.5835	33.0511	145680	ARS206.7	1480	opposite	ND	leading	TFIID-dominated	0.716561	1.06392	rest	38.0789	32.549	5.52984	39.3149	35.2776	4.03727
YBL037W	2	146618	48.605	32.9336	147180	ARS206.8	-2220	opposite	0	lagging	TFIID-dominated	-0.268945	0.395541	rest	41.0459	40.3332	0.712747	47.8771	43.9513	3.92584
YBL035C	2	154182	50.7899	32.5444	153630	ARS206.9	1430	opposite	ND	leading	TFIID-dominated	0.0954287	0.468059	G1	39.2187	40.1321	-0.91338	41.0123	43.0488	-2.03655
YBL034C	2	158950	47.0177	31.8698	158400	ARS207.0	-2200	same	0.666667	lagging	ND	-0.330568	0.0874046	rest	42.9285	41.1238	1.80478	45.634	46.6394	-1.00541
YBL032W	2	159602	46.1055	31.5626	160170	ARS207.0	-430	opposite	0.666667	lagging	ND	ND	ND	ND	39.3507	40.2709	-0.920134	47.983	45.0427	2.94035
YBL033C	2	160214	45.8495	31.6697	159660	ARS207.0	-940	same	0.666667	lagging	TFIID-dominated	-0.331752	0.367953	rest	41.9939	39.9404	2.05354	48.6164	49.6319	-1.01548
YBL031W	2	161178	44.8873	31.2251	161760	ARS207.0	1160	same	1	leading	TFIID-dominated	-0.0451269	0.477729	rest	36.4073	40.9268	-4.51952	37.0233	45.4801	-8.45674
YBL030C	2	164646	43.8282	30.6229	164100	ARS207.1	-900	same	1	lagging	SAGA-dominated	0.869706	2.09371	M	41.36	40.8156	0.544416	38.6184	43.601	-4.98258
YBL029W	2	165594	43.8804	30.1084	166170	ARS207.1	1170	same	1	leading	TFIID-dominated	ND	ND	ND	38.8534	39.4572	-0.603822	34.6894	36.5792	-1.88982
YBL029C-A	2	165382	43.8804	30.3647	164850	ARS207.1	-150	same	1	lagging	ND	-0.205877	0.425413	ND	36.7355	35.0073	1.72822	34.2157	33.9081	0.30761
YBL027W	2	167874	43.7496	29.6327	168450	ARS207.2	-150	opposite	0.5	lagging	TFIID-dominated	ND	ND	ND	38.9887	37.1579	1.83087	34.7677	37.2762	-2.50852
YBL028C	2	168390	42.8849	29.6971	167850	ARS207.2	-750	same	0.5	lagging	TFIID-dominated	0.981706	-0.308	rest	37.0815	39.424	-2.34246	34.2844	41.0729	-6.78851
YBL026W	2	170050	41.0039	29.5479	170640	ARS207.3	840	same	1	leading	ND	0.775623	-0.780745	rest	40.57	37.5976	2.9724	41.755	34.0858	7.66923
YBL025W	2	170922	40.6289	29.5765	171510	ARS207.4	-290	opposite	0	lagging	TFIID-dominated	0.307706	0.106771	rest	35.8273	37.623	-1.79567	33.9966	40.8255	-6.82884
YBL024W	2	172002	38.294	29.6155	172590	ARS207.4	790	same	1	leading	TFIID-dominated	0.340436	0.405233	rest	36.0093	34.5249	1.48446	34.1955	33.4102	0.785356
YBL023C	2	178110	37.289	29.4005	177570	ARS207.1.1	970	opposite	0	leading	TFIID-dominated	ND	ND	ND	38.4483	37.6946	0.753707	40.5548	37.0656	3.48918
YBL022C	2	181910	40.2581	28.0532	181380	ARS207.1.3	780	opposite	0	leading	ND	-0.196445	0.0831774	rest	39.6183	38.5865	1.03176	43.1286	44.5972	-1.46856
YBL020W	2	181834	40.2581	27.4779	182400	ARS207.1.4	200	same	1	leading	TFIID-dominated	ND	ND	ND	38.6564	38.4672	0.189228	37.1298	37.8887	-0.758886
YBL021C	2	182646	40.3649	27.7761	182100	ARS207.1.4	-100	same	nd	lagging	TFIID-dominated	-0.389794	0.22206	rest	40.3555	42.0889	-1.73343	51.6455	44.7714	6.87411
YBL019W	2	183762	41.0283	26.4816	184350	ARS207.1.5	950	same	ND	leading	TFIID-dominated	-0.280127	-0.305412	rest	34.9981	37.7513	-2.75318	37.8566	36.7768	1.07986
YBL018C	2	187030	37.4269	24.6287	186480	ARS207.1.6	680	opposite	0	leading	TFIID-dominated	0.186373	-0.283128	rest	39.155	38.2838	0.871175	39.0973	41.1814	-2.08412
YBL016W	2	191953	29.9667	20.2939	192540	ARS207.5.0	-1260	opposite	0.5	lagging	TFIID-dominated	ND	ND	ND	32.7607	37.905	-5.14432	30.3367	37.5584	-7.22168
YBL017C	2	192294	30.8778	20.9029	191760	ARS207.5.0	-2040	same	0.5	lagging	TFIID-dominated	-0.0728328	0.296415	rest	37.0687	38.4286	-1.35997	36.0974	37.1886	-1.09114
YBL015W	2	193530	34.1936	19.5589	194100	ARS207.5.0	300	same	1	leading	TFIID-dominated	-0.938877	-0.427269	rest	28.4185	27.1532	1.2653	29.2919	26.9899	2.30193
YBL013W	2	201514	29.8126	17.8961	202080	ARS207.5.1	-920	opposite	0.5	lagging	ND	ND	ND	ND	35.2738	39.5172	-4.24334	29.8756	34.8625	-4.98689
YBL014C	2	202286	32.946	17.9067	201750	ARS207.5.1	-1250	same	0.5	lagging	TFIID-dominated	-0.395577	-0.175718	rest	33.8247	36.2754	-2.4507	29.2792	25.4012	3.87799
YBL011W	2	202939	33.534	18.0033	203520	ARS207.5.1	520	same	0.5	leading	TFIID-dominated	-0.252922	0.346858	rest	38.8077	36.6342	2.17355	35.1986	33.2958	1.90282
YBL012C	2	204309	34.1817	18.0033	203760	ARS207.5.1	760	opposite	0.5	leading	TFIID-dominated	ND	ND	ND	38.9399	35.5206	3.41937	41.0383	30.2715	10.7668
YBL009W	2	206659	34.3204	19.2518	207240	ARS207.8.0	1040	same	0.5	leading	TFIID-dominated	ND	ND	ND	37.785	37.6709	0.114123	36.8896	35.3334	1.55618
YBL010C	2	207471	34.187	19.2518	206940	ARS207.8.0	740	opposite	0.5	leading	ND	-0.376877	-0.116731	rest	36.1856	36.8426	-0.656972	37.2762	32.2189	5.05725
YBL008W-A	2	208911	35.8791	20.7467	209490	ARS207.8.2	-710	opposite	0	lagging	ND	ND	ND	ND	39.8856	38.3584	1.52724	38.4074	42.8678	-4.46033
YBL008W	2	209155	35.8791	20.7467	209730	ARS207.8.2	-470	opposite	0	lagging	TFIID-dominated	ND	ND	ND	40.2109	40.6438	-0.432916	39.98	38.8874	1.09259
YBL006W-A	2	216213	45.4328	23.3629	216780	ARS207.8.4	580	same	1	leading	ND	ND	ND	ND	38.3773	39.9833	-1.60605	40.7606	44.2063	-3.44569
YBL005W	2	216972	48.2263	23.2999	217560	ARS207.8.5	160	same	1	leading	TFIID-dominated	ND	ND	ND	38.9711	39.6478	-0.676652	39.6218	39.4207	0.201059
YBL006C	2	217663	60.7985	23.35	217110	ARS207.8.5	-290	same	nd	lagging	TFIID-dominated	0.23054	0.403072	rest	39.9234	38.3161	1.60725	42.6211	39.9379	2.68311
YBL004W	2	227027	35.3119	15.6343	227610	ARS208.0	-6990	opposite	0	lagging	TFIID-dominated	0.401969	0.0218589	rest	25.0764	25.8493	-0.772955	23.9799	23.8551	0.124833
YBL002W	2	235555	31.1435	17.2796	236130	ARS208.1	-470	opposite	0.5	lagging	TFIID-dominated	ND	ND	ND	11.2536	10.9771	0.276452	12.3205	13.2754	-0.954917
YBL003C	2	236351	25.5778	17.2796	235800	ARS208.1	-800	same	0.5	lagging	TFIID-dominated	2.24712	1.62627	S	18.8815	18.4096	0.471869	19.5944	17.1321	2.46226
YBL001C	2	238151	27.7109	17.7167	237600	ARS208.1	1000	opposite	0	leading	TFIID-dominated	0.824706	0.909454	rest	14.1482	9.73224	4.41596	12.5708	12.0718	0.498952
YBR001C	2	241911	32.5432	18.4251	241380	ARS208.3	-420	same	1	lagging	TFIID-dominated	-0.263927	-0.378296	rest	24.9545	23.1194	1.83505	24.3077	22.4223	1.88543
YBR003W	2	242291	32.8289	18.4167	242880	ARS208.4	-920	opposite	0	lagging	TFIID-dominated	ND	ND	ND	26.1081	28.6923	-2.58425	26.7322	27.1237	-0.391402
YBR002C	2	243103	31.402	18.4167	242550	ARS208.3	750	opposite	nd	leading	TFIID-dominated	0.417998	0.153449	rest	28.9192	29.3825	-0.463277	23.6953	25.794	-2.09877
YBR005W	2	245331	31.7664	18.2026	245910	ARS208.5	-690	opposite	0.5	lagging	SAGA-dominated	ND	ND	ND	32.9373	34.2719	-1.33465	28.2926	29.3229	-1.03037
YBR004C	2	246207	32.1775	18.2072	245670	ARS208.5	-930	same	0.5	lagging	SAGA-dominated	0.170159	-0.359189	rest	29.4321	30.0928	-0.660674	28.089	33.3785	-5.28948
YBR006W	2	246267	32.1775	18.2193	246840	ARS208.5	240	same	1	leading	SAGA-dominated	-0.479484	-0.671687	rest	25.7516	27.2839	-1.53239	24.6881	26.6126	-1.92451
YBR007C	2	251599	35.3417	19.4505	251040	ARS209.1	-360	same	1	lagging	TFIID-dominated	-0.32202	-0.127276	G1	23.016	21.7427	1.27338	21.7914	21.0638	0.727569
YBR010W	2	255803	58.54	22.3136	256380	ARS209.2	2580	same	0.2	leading	TFIID-dominated	ND	ND	ND	22.7289	21.2371	1.49177	20.8453	20.5501	0.295198
YBR008C	2	255695	58.54	21.6909	255150	ARS209.2	1350	opposite	0.2	leading	TFIID-dominated	0.226087	0.00697521	S	13.641	12.7511	0.889947	12.5918	13.4011	-0.809289
YBR009C	2	256239	64.3674	22.0025	255690	ARS209.2	1890	opposite	0.2	leading	TFIID-dominated	1.99437	2.51763	S	17.0566	16.0188	1.03777	15.515	14.3146	1.20043
YBR011C	2	258527	0	23.5231	257970	ARS209.2	4170	opposite	0.2	leading	TFIID-dominated	0.543973	1.09576	rest	48.4381	25.8397	22.5983	23.8984	23.0558	0.842602
YBR012C	2	260063	R	24.3963	259530	ARS209.2	5730	opposite	0.2	leading	SAGA-dominated	ND	ND	ND	0	0		0	0
YBR013C	2	266378	32.2709	28.5773	265830	ARS210.5.0	-4370	same	1	lagging	TFIID-dominated	-0.317627	-1.07549	rest	37.3689	30.1432	7.2257	29.9349	24.5245	5.41038
YBR016W	2	269707	34.3871	30.0418	270270	ARS210.5.0	70	same	1	leading	TFIID-dominated	ND	ND	ND	27.7047	28.0906	-0.385962	31.0365	30.0655	0.970968
YBR015C	2	270167	34.9266	29.9223	269610	ARS210.5.0	-590	same	1	lagging	TFIID-dominated	-0.193484	0.344632	rest	36.6706	35.4038	1.26676	30.6264	32.1732	-1.54679
YBR017C	2	274335	33.2617	30.571	273780	ARS210.5.0	3580	opposite	1	leading	ND	0.10598	0.238869	rest	30.0341	31.0307	-0.99662	32.2555	31.2036	1.05192
YBR018C	2	276026	32.3521	30.6372	275490	ARS210.5.1	-3510	same	0.666667	lagging	ND	-1.07885	-1.14863	rest	31.961	30.5146	1.44638	31.9028	35.4498	-3.54706
YBR020W	2	278355	43.834	30.7867	278940	ARS210.5.1	-60	opposite	0.666667	lagging	ND	ND	ND	ND	35.2838	36.512	-1.22818	37.8912	39.4654	-1.57426
YBR019C	2	278851	45.3672	30.7403	278310	ARS210.5.1	-690	same	0.666667	lagging	TFIID-dominated	-0.72646	-0.515864	rest	37.1133	38.2349	-1.12157	33.8921	37.0786	-3.18648
YBR021W	2	280843	47.2313	31.1498	281430	ARS210.5.2	-1970	opposite	0	lagging	TFIID-dominated	-0.298854	0.789894	rest	38.7408	39.9218	-1.18103	42.5403	44.7477	-2.2074
YBR022W	2	283163	45.4853	31.5963	283740	ARS210.5.2	340	same	0.375	leading	TFIID-dominated	0.258706	0.369232	rest	39.8546	39.2582	0.596341	43.5743	44.0102	-0.435956
YBR024W	2	288843	56.5902	33.9701	289410	ARS210.5.2	6010	same	0.375	leading	TFIID-dominated	ND	ND	ND	41.6862	41.2556	0.430584	47.7825	47.5576	0.22491
YBR023C	2	288559	56.3462	33.4345	288000	ARS210.5.2	4600	opposite	0.375	leading	TFIID-dominated	-0.0417445	0.69311	rest	40.6787	40.9778	-0.299071	43.9768	44.7299	-0.753086
YBR025C	2	292575	58.169	35.4717	292020	ARS210.5.2	8620	opposite	0.375	leading	TFIID-dominated	0.944436	0.9954	rest	41.6049	40.3212	1.28368	46.8347	45.2306	1.60406
YBR027C	2	294855	60.7857	36.2377	294300	ARS210.5.2	10900	opposite	0.375	leading	ND	ND	ND	ND	43.6526	45.0085	-1.35589	51.3406	56.5317	-5.19115
YBR028C	2	296501	76.129	36.7796	295950	ARS210.5.2	12550	opposite	0.375	leading	TFIID-dominated	0.0664445	0.280803	rest	42.149	43.8213	-1.67226	48.3164	51.2248	-2.9084
YBR030W	2	297515	87.6768	37.0527	298080	ARS210.5.2	14680	same	0.375	leading	TFIID-dominated	ND	ND	ND	50.4282	49.3452	1.08299	55.3839	56.4374	-1.05357
YBR029C	2	298359	79.8497	37.0527	297810	ARS210.5.2	14410	opposite	0.375	leading	TFIID-dominated	0.584659	1.06557	rest	45.1395	44.9876	0.151837	56.2166	53.5124	2.70426
YBR031W	2	299603	59.7447	36.9996	300180	ARS211.0	-16420	opposite	ND	lagging	TFIID-dominated	2.04121	2.53188	rest	46.5897	46.7804	-0.190724	58.0655	56.7169	1.34865
YBR033W	2	301443	58.8074	36.6469	302010	ARS211.0	-14590	opposite	ND	lagging	TFIID-dominated	-0.198927	-0.149023	rest	43.565	42.6305	0.934467	49.2667	51.3658	-2.09913
YBR032W	2	301018	59.1689	36.7575	301590	ARS211.0	-15010	opposite	ND	lagging	ND	ND	ND	ND	44.0828	42.9288	1.15398	51.2488	54.2393	-2.99053
YBR034C	2	306519	50.9203	35.4395	305970	ARS211.0	-10630	same	ND	lagging	TFIID-dominated	0.885873	0.633511	rest	42.6106	43.2691	-0.658514	48.0438	48.9477	-0.90388
YBR035C	2	307487	48.2787	35.0607	306930	ARS211.0	-9670	same	ND	lagging	TFIID-dominated	1.09125	1.03097	rest	42.5606	40.439	2.12164	51.3541	50.3703	0.983799
YBR036C	2	310871	47.1269	33.5896	310320	ARS211.0	-6280	same	ND	lagging	TFIID-dominated	0.101706	0.970946	rest	45.2452	41.5264	3.71876	49.7523	47.8276	1.92477
YBR038W	2	311331	46.4206	33.1814	311910	ARS211.0	-4690	opposite	ND	lagging	TFIID-dominated	ND	ND	ND	40.2375	41.9834	-1.74589	43.114	44.1111	-0.997096
YBR037C	2	311999	45.8261	33.1814	311460	ARS211.0	-5140	same	ND	lagging	TFIID-dominated	-0.0232269	0.0692164	rest	41.7011	41.3661	0.334929	48.1201	47.3173	0.802775
YBR039W	2	314995	41.1933	31.572	315570	ARS211.0	-1030	opposite	ND	lagging	TFIID-dominated	0.323873	0.813105	rest	29.5535	35.1112	-5.55767	30.5903	33.2902	-2.69997
YBR040W	2	316467	38.2974	30.8866	317040	ARS211.0	440	same	ND	leading	ND	-0.324698	-0.989121	rest	36.0093	33.5104	2.49897	39.931	39.8242	0.106809
YBR041W	2	317699	35.8714	30.4147	318270	ARS211.0	1670	same	ND	leading	TFIID-dominated	-0.0452519	0.0383259	rest	33.9586	31.8866	2.07194	38.6066	31.4066	7.19998
YBR042C	2	322167	34.9818	28.9753	321630	ARS211.1	230	opposite	0	leading	TFIID-dominated	0.228673	-0.0602029	rest	38.9158	37.0993	1.81655	37.1609	32.2258	4.93507
YBR043C	2	324615	37.5148	28.3452	324060	ARS211.2	-140	same	1	lagging	TFIID-dominated	-0.199571	0.287643	rest	35.6086	37.5775	-1.96882	36.3779	37.4587	-1.08076
YBR044C	2	326647	37.8539	28.1255	326100	ARS211.3	-1100	same	1	lagging	TFIID-dominated	-0.327064	-0.0312841	rest	29.3336	30.3982	-1.0646	30.601	33.8659	-3.26493
YBR047W	2	331283	45.1728	29.4863	331860	ARS211.4	-1940	opposite	0.333333	lagging	ND	ND	ND	ND	41.0803	38.1734	2.90699	36.7468	38.5247	-1.77789
YBR046C	2	332055	42.5236	29.4863	331500	ARS211.4	-2300	same	0.333333	lagging	TFIID-dominated	ND	ND	ND	39.9	37.349	2.55103	33.9414	37.0679	-3.12644
YBR048W	2	332235	42.5236	30.0047	332820	ARS211.4	-980	opposite	0.333333	lagging	TFIID-dominated	1.91312	1.58206	rest	40.8917	39.116	1.77578	43.866	40.8243	3.04165
YBR049C	2	337447	47.6169	32.8391	336900	ARS211.5	1500	opposite	0.4	leading	TFIID-dominated	ND	ND	ND	42.3573	40.2143	2.14305	50.4854	41.6424	8.84297
YBR051W	2	337485	47.6169	33.5572	338070	ARS211.5	2670	same	0.4	leading	ND	ND	ND	ND	43.7264	45.1002	-1.37382	47.0048	48.8047	-1.79996
YBR052C	2	339919	51.7794	34.6575	339360	ARS211.5	3960	opposite	0.4	leading	TFIID-dominated	-0.106377	-0.458014	rest	40.5327	43.3469	-2.81418	43.8109	44.4194	-0.608494
YBR053C	2	341271	54.0143	35.3873	340740	ARS211.5	5340	opposite	0.4	leading	TFIID-dominated	-0.102577	-0.841221	M/G1	38.5366	38.6691	-0.13246	42.5322	42.0479	0.484235
YBR054W	2	342075	55.9558	36.7607	342660	ARS211.5	7260	same	0.4	leading	SAGA-dominated	0.0974287	-1.13293	M	39.251	40.3463	-1.09531	44.4606	43.8388	0.621836
YBR056W	2	347315	62.2841	38.2981	347880	ARS211.5	12480	same	0.4	leading	TFIID-dominated	ND	ND	ND	43.3506	44.7011	-1.35043	51.5457	50.6198	0.925837
YBR055C	2	347823	63.7206	38.3136	347280	ARS211.5	11880	opposite	0.4	leading	TFIID-dominated	-0.238127	-0.0207854	rest	43.0494	42.341	0.708475	49.0134	49.0878	-0.0744595
YBR056W-A	2	350752	67.654	37.7249	351330	ARS211.5	15930	same	0.4	leading	ND	-0.185127	-0.637536	ND	46.0979	46.6693	-0.571445	58.9011	56.9177	1.98345
YBR056C-B	2	351948	66.0854	37.6321	351390	ARS211.5	15990	opposite	0.4	leading	ND	ND	ND	ND	46.0979	46.6693	-0.571445	58.9011	56.9177	1.98345
YBR057C	2	353879	66.6016	37.2654	353340	ARS211.5	17940	opposite	0.4	leading	TFIID-dominated	0.0638731	0.116949	rest	46.7766	43.3755	3.40104	46.8207	42.9324	3.88834
YBR058C	2	356559	67.2171	36.6653	356010	ARS212.0	-15790	same	0.888889	lagging	TFIID-dominated	-0.269682	0.134285	rest	48.7796	48.2791	0.500592	53.254	55.7535	-2.49945
YBR058C-A	2	357127	66.6893	36.5127	356580	ARS212.0	-15220	same	0.888889	lagging	ND	0.200373	0.284497	ND	47.2675	48.4199	-1.15237	52.8979	53.7509	-0.853088
YBR059C	2	360831	62.4011	35.2167	360300	ARS212.0	-11500	same	0.888889	lagging	TFIID-dominated	-0.340435	0.211999	rest	46.8108	45.2693	1.54156	55.274	55.2173	0.056659
YBR060C	2	363119	58.4839	34.3885	362580	ARS212.0	-9220	same	0.888889	lagging	TFIID-dominated	0.115691	0.0446516	rest	46.1922	45.7758	0.416453	57.5535	56.8026	0.750864
YBR061C	2	366239	54.5536	34.0023	365700	ARS212.0	-6100	same	0.888889	lagging	TFIID-dominated	ND	ND	ND	44.4641	42.9785	1.48554	53.7813	48.944	4.83721
YBR062C	2	367102	53.8788	34.0021	366570	ARS212.0	-5230	same	0.888889	lagging	TFIID-dominated	0.169773	0.335274	rest	45.0882	43.7252	1.36293	53.604	50.4444	3.15959
YBR064W	2	367260	53.7639	34.0285	367830	ARS212.0	-3970	opposite	0.888889	lagging	TFIID-dominated	ND	ND	ND	42.9108	43.7551	-0.84426	56.9541	51.7269	5.22713
YBR065C	2	370175	51.4217	34.0622	369630	ARS212.0	-2170	same	0.888889	lagging	TFIID-dominated	-0.0170269	-0.362578	rest	42.4531	42.2661	0.186961	53.3903	53.7781	-0.387831
YBR066C	2	371262	49.7434	34.029	370710	ARS212.0	-1090	same	0.888889	lagging	TFIID-dominated	0.32573	0.218922	rest	40.6554	40.4431	0.21235	49.8045	54.6962	-4.89171
YBR067C	2	373302	46.631	33.8047	372750	ARS212.1	-650	same	1	lagging	TFIID-dominated	0.990302	-0.145278	M/G1	44.5258	39.9053	4.62048	51.8255	51.0167	0.808839
YBR068C	2	376246	44.2952	33.103	375690	ARS212.2	-510	same	1	lagging	SAGA-dominated	1.68498	2.08915	rest	41.3863	40.2147	1.17163	54.977	52.725	2.25203
YBR069C	2	379046	40.5269	32.1469	378510	ARS212.3	-490	same	1	lagging	TFIID-dominated	0.726573	0.972043	M	38.4419	38.3328	0.109065	45.6134	46.6288	-1.01544
YBR071W	2	379738	40.8087	31.6253	380310	ARS212.4	-690	opposite	0	lagging	SAGA-dominated	ND	ND	ND	40.4946	40.3667	0.127854	42.2759	41.1476	1.12831
YBR070C	2	380478	41.4401	31.6253	379920	ARS212.3	920	opposite	nd	leading	TFIID-dominated	0.0829981	-0.279966	G1	39.8384	41.7292	-1.89079	49.3332	48.5941	0.739025
YBR072W	2	381442	41.3398	30.9219	382020	ARS212.4	1020	same	nd	leading	SAGA-dominated	-0.464627	-0.680621	rest	38.2893	38.1309	0.158342	40.1123	39.7122	0.400119
YBR073W	2	382634	40.0834	30.5649	383220	ARS212.4	2220	same	nd	leading	TFIID-dominated	ND	ND	ND	38.7964	40.3056	-1.50923	41.1523	38.4589	2.69346
YBR072C-A	2	383515	39.4944	30.5649	382980	ARS212.4	1980	opposite	nd	leading	ND	0.0483731	-0.477539	ND	39.8154	41.3489	-1.53346	42.5876	44.2156	-1.628
YBR074W	2	385770	40.257	29.4718	386340	ARS213.0	-1460	opposite	0	lagging	TFIID-dominated	-0.0877697	-0.0745149	rest	36.2286	34.477	1.75166	35.27	37.4361	-2.16604
YBR076W	2	389868	42.727	28.4608	390450	ARS213.1	650	same	1	leading	TFIID-dominated	-0.455055	-0.420719	rest	37.5563	40.088	-2.53172	35.8531	38.1454	-2.29229
YBR076C-A	2	392110	40.2887	28.2353	391560	ARS213.2	-1440	same	1	lagging	ND	ND	ND	ND	40.2156	36.3628	3.85283	38.2727	36.1014	2.17132
YBR078W	2	392442	38.9601	27.9901	393030	ARS213.2	30	same	1	leading	SAGA-dominated	ND	ND	ND	36.5629	36.0228	0.540125	34.6121	32.3991	2.21299
YBR077C	2	392786	38.9601	28.159	392250	ARS213.2	-750	same	1	lagging	TFIID-dominated	0.834373	-0.494468	rest	36.8334	37.1689	-0.335463	38.7063	38.4441	0.262214
YBR079C	2	398798	31.9394	26.6192	398250	ARS213.4	850	opposite	0	leading	TFIID-dominated	0.65704	1.03715	rest	33.4796	35.3579	-1.87836	34.05	33.6213	0.428762
YBR080C	2	401422	39.1417	25.7357	400890	ARS213.4	3490	opposite	0	leading	TFIID-dominated	-0.0395713	-0.0516999	rest	30.5873	28.794	1.79335	32.7262	28.179	4.54714
YBR081C	2	405886	R	25.4326	405330	ARS214.0	-2470	same	0.666667	lagging	TFIID-dominated	-0.634715	-0.353356	rest	35.6733	25.2843	10.389	30.589	27.7673	2.82174
YBR083W	2	406834	30.9617	25.6447	407400	ARS214.0	-400	opposite	0.666667	lagging	SAGA-dominated	ND	ND	ND	21.1527	26.1444	-4.99179	21.4306	22.9167	-1.48602
YBR082C	2	407774	29.9855	25.6447	407220	ARS214.0	-580	same	0.666667	lagging	TFIID-dominated	0.791623	-0.286479	rest	17.3156	19.4914	-2.17588	18.3465	18.153	0.193485
YBR084W	2	410474	32.5914	26.2335	411060	ARS214.3	-340	opposite	0	lagging	TFIID-dominated	0.120456	0.348682	rest	28.592	31.5088	-2.91677	29.4609	25.0649	4.39598
YBR085W	2	415370	36.7026	25.8318	415950	ARS215.0	150	same	1	leading	SAGA-dominated	ND	ND	ND	28.1246	27.0425	1.08214	29.5595	26.9728	2.58672
YBR084C-A	2	415798	35.5125	25.9108	415260	ARS215.0	-540	same	nd	lagging	TFIID-dominated	1.93125	1.55093	rest	33.8319	32.0079	1.82396	29.7632	33.198	-3.43475
YBR085C-A	2	419766	42.6125	26.1262	419220	ARS215.0	3420	opposite	1	leading	ND	0.0201231	-0.788105	ND	39.251	38.2761	0.974938	36.9317	34.652	2.27968
YBR087W	2	423242	42.2152	29.7522	423810	ARS215.5.0	-7990	opposite	0	lagging	TFIID-dominated	ND	ND	ND	34.7528	36.4899	-1.73706	36.6776	36.8866	-0.209047
YBR086C	2	423838	43.6497	29.2847	423300	ARS215.0	7500	opposite	1	leading	TFIID-dominated	0.409595	0.572622	M	35.2285	32.1021	3.12639	35.8074	32.0556	3.75175
YBR089W	2	424676	47.7636	31.0405	425250	ARS215.5.0	-6550	opposite	0	lagging	SAGA-dominated	ND	ND	ND	40.6442	41.417	-0.772859	38.4449	44.2437	-5.79881
YBR088C	2	426310	56.0208	31.4177	425760	ARS215.5.0	-6040	same	0	lagging	SAGA-dominated	0.820873	0.824702	G1	40.4774	41.1177	-0.640315	38.3249	44.4394	-6.11449
YBR089C-A	2	426982	55.871	32.0822	426450	ARS215.5.0	-5350	same	0	lagging	ND	0.979123	0.464877	rest	42.3041	41.6641	0.640059	40.3416	42.3688	-2.02727
YBR090C	2	427551	54.4342	32.3681	427020	ARS215.5.0	-4780	same	0	lagging	TFIID-dominated	ND	ND	ND	42.305	41.5734	0.731572	40.7315	42.1491	-1.41759
YBR091C	2	427977	52.7799	32.6223	427440	ARS215.5.0	-4360	same	0	lagging	TFIID-dominated	0.86554	0.310948	rest	41.8164	40.6749	1.14155	43.7512	41.9413	1.80987
YBR092C	2	429630	51.2352	33.1894	429090	ARS215.5.0	-2710	same	0	lagging	SAGA/TFIID	0.451873	-0.491501	M	41.699	40.7126	0.986378	44.2512	44.3043	-0.0530527
YBR094W	2	431474	54.7483	33.5083	432060	ARS215.5.0	260	same	nd	leading	TFIID-dominated	ND	ND	ND	41.672	41.201	0.471021	48.9388	50.622	-1.68321
YBR093C	2	431486	54.7483	33.4973	430950	ARS215.5.0	-850	same	0	lagging	SAGA/TFIID	0.55804	-0.543225	M	41.5639	42.9958	-1.43188	46.8404	46.6709	0.169553
YBR014C	2	433772	61.867	33.4943	433230	ARS215.5.0	1430	opposite	nd	leading	TFIID-dominated	0.0620398	-0.643653	rest	41.2387	41.2757	-0.0370185	49.3779	48.8148	0.563093
YBR096W	2	435434	61.3314	33.9917	436020	ARS215.5.0	4220	same	nd	leading	TFIID-dominated	ND	ND	ND	43.3302	44.5743	-1.24408	47.6551	46.7783	0.876817
YBR095C	2	436222	60.3223	33.8119	435690	ARS215.5.0	3890	opposite	nd	leading	TFIID-dominated	-0.204327	-0.125101	rest	43.5637	42.8009	0.76278	48.7526	50.4843	-1.73172
YBR097W	2	436402	60.2689	34.2173	436980	ARS215.5.0	5180	same	nd	leading	ND	-0.0962151	-0.352057	rest	43.4413	45.11	-1.66867	50.6772	48.5726	2.10462
YBR098W	2	440994	68.5648	37.9364	441570	ARS215.5.0	9770	same	nd	leading	TFIID-dominated	-0.366627	0.129831	rest	47.9795	46.0614	1.91812	57.5797	56.8747	0.70502
YBR099C	2	443800	67.144	39.0069	443250	ARS215.5.0	11450	opposite	nd	leading	TFIID-dominated	ND	ND	ND	50.1514	46.0978	4.05358	57.343	59.1595	-1.81649
YBR101C	2	445254	69.7379	39.9447	444720	ARS215.5.0	12920	opposite	nd	leading	TFIID-dominated	0.820873	0.633546	rest	48.9635	47.9291	1.03443	58.6826	61.4862	-2.80356
YBR103W	2	447050	72.096	41.69	447630	ARS215.5.0	15830	same	nd	leading	TFIID-dominated	ND	ND	ND	45.5225	48.4837	-2.96125	59.6781	55.9538	3.72423
YBR102C	2	447894	72.9846	41.4032	447360	ARS215.5.0	15560	opposite	nd	leading	SAGA-dominated	-0.425682	-0.138109	rest	46.7509	47.0416	-0.290689	53.9682	58.8347	-4.86655
YBR104W	2	449074	71.1814	42.7362	449640	ARS215.5.0	17840	same	nd	leading	TFIID-dominated	0.0188731	0.713478	rest	50.9643	47.2609	3.70342	57.2358	55.7909	1.44492
YBR103C-A	2	449956	70.1574	42.7362	449400	ARS215.5.0	17600	opposite	nd	leading	ND	ND	ND	ND	47.8378	47.6731	0.164706	56.6866	56.8514	-0.164807
YBR106W	2	452074	63.222	43.6075	452640	ARS215.5.0	20840	same	nd	leading	TFIID-dominated	ND	ND	ND	45.1431	47.5523	-2.40915	50.7065	57.4776	-6.77101
YBR105C	2	452614	63.0953	43.5328	452070	ARS215.5.0	20270	opposite	nd	leading	SAGA-dominated	-0.25077	0.0334701	rest	46.8224	47.7159	-0.89348	53.2947	57.881	-4.58636
YBR108W	2	454306	62.9099	43.6674	454890	ARS215.5.0	23090	same	nd	leading	TFIID-dominated	ND	ND	ND	44.818	47.9607	-3.14275	57.417	59.4336	-2.01664
YBR107C	2	455182	62.4588	43.6674	454650	ARS215.5.0	22850	opposite	nd	leading	TFIID-dominated	-0.0671269	-0.100721	rest	42.0821	47.278	-5.19591	50.6979	55.5346	-4.8367
YBR110W	2	458365	58.1935	42.9004	458940	ARS215.5.0	27140	same	nd	leading	TFIID-dominated	ND	ND	ND	43.8981	44.8047	-0.906613	53.1387	50.2914	2.84726
YBR109W-A	2	458101	58.1935	42.9004	458670	ARS215.5.0	26870	same	nd	leading	ND	ND	ND	ND	46.2148	47.0891	-0.874234	53.8616	50.5787	3.28284
YBR109C	2	458919	60.1073	43.0486	458370	ARS215.5.0	26570	opposite	nd	leading	TFIID-dominated	0.179123	0.200817	rest	47.084	46.3285	0.755512	52.8649	51.6161	1.24881
YBR111W-A	2	461603	55.9714	41.815	462180	ARS216.0	-26020	opposite	0.625	lagging	ND	ND	ND	ND	37.7996	43.434	-5.6344	51.7599	52.2583	-0.498379
YBR111C	2	462343	54.932	41.9517	461790	ARS216.0	-26410	same	0.625	lagging	TFIID-dominated	-0.35696	-0.326847	rest	44.1948	41.5075	2.68733	46.5746	47.5854	-1.01081
YBR113W	2	465059	45.032	41.1178	465630	ARS216.0	-22570	opposite	0.625	lagging	TFIID-dominated	ND	ND	ND	42.6496	40.302	2.34758	55.3092	53.7848	1.52444
YBR114W	2	466659	42.9437	40.8194	467220	ARS216.0	-20980	opposite	0.625	lagging	TFIID-dominated	ND	ND	ND	43.8899	41.3592	2.53067	43.5752	46.2428	-2.66756
YBR112C	2	466463	42.9437	41.0265	465930	ARS216.0	-22270	same	0.625	lagging	TFIID-dominated	-0.207189	1.5344	rest	40.3957	42.6431	-2.2474	53.2802	52.2285	1.05171
YBR115C	2	474527	53.1295	37.3639	473970	ARS216.0	-14230	same	0.625	lagging	SAGA-dominated	-0.19745	0.869321	rest	40.9716	39.0279	1.94371	39.5014	41.5712	-2.06988
YBR116C	2	475219	61.0168	36.9126	474660	ARS216.0	-13540	same	0.625	lagging	ND	ND	ND	ND	38.9617	38.8944	0.06727	38.3786	43.509	-5.13036
YBR118W	2	477059	41.218	33.8348	477630	ARS216.0	-10570	opposite	0.625	lagging	SAGA-dominated	ND	ND	ND	36.2723	41.1924	-4.92017	29.3895	34.7962	-5.40668
YBR117C	2	476930	41.218	34.8876	476400	ARS216.0	-11800	same	0.625	lagging	SAGA-dominated	-0.727182	-0.645869	rest	39.5607	36.5461	3.01458	38.828	39.5522	-0.724197
YBR119W	2	478755	R	32.3758	479340	ARS216.0	-8860	opposite	0.625	lagging	TFIID-dominated	0.965623	0.0167533	rest	29.3913	30.2358	-0.844496	29.3508	32.6762	-3.32539
YBR120C	2	481503	35.395	30.916	480960	ARS216.0	-7240	same	0.625	lagging	TFIID-dominated	0.45654	-0.207756	rest	30.6188	36.0477	-5.42895	30.7882	34.7797	-3.99158
YBR121C-A	2	482977	33.9047	30.3035	482430	ARS216.0	-5770	same	0.625	lagging	ND	ND	ND	ND	29.1173	33.1825	-4.06524	33.1016	33.5403	-0.438753
YBR121C	2	483860	32.42	30.1945	483330	ARS216.0	-4870	same	0.625	lagging	TFIID-dominated	0.534873	0.618876	rest	29.2717	33.316	-4.04425	30.9006	33.3628	-2.46215
YBR122C	2	485039	31.0993	30.1349	484500	ARS216.0	-3700	same	0.625	lagging	TFIID-dominated	ND	ND	ND	38.1144	24.3315	13.7829	28.1916	23.8655	4.32608
YBR124W	2	486000	31.8296	30.5917	486570	ARS216.0	-1630	opposite	0.625	lagging	TFIID-dominated	ND	ND	ND	31.341	27.5164	3.82459	25.4878	27.3367	-1.84891
YBR123C	2	487255	26.5196	30.5917	486720	ARS216.0	-1480	same	0.625	lagging	TFIID-dominated	-0.207349	-0.633288	rest	26.9268	24.0518	2.87502	26.5694	26.3027	0.266679
YBR125C	2	489055	31.5429	31.4597	488520	ARS216.0	320	opposite	0	leading	TFIID-dominated	0.00137311	-0.401968	rest	36.1718	32.3994	3.77248	32.0099	29.5386	2.4713
YBR126W-A	2	490343	33.3006	32.4214	490920	ARS216.1	-80	opposite	0	lagging	ND	ND	ND	ND	33.5586	33.6321	-0.0734897	32.3276	36.389	-4.06133
YBR126W-B	2	490420	34.3181	32.6378	491010	ARS216.1	10	same	1	leading	ND	ND	ND	ND	33.7781	33.695	0.0831129	36.5507	32.4764	4.07424
YBR126C	2	490983	35.3404	32.4214	490440	ARS216.1	-560	same	0	lagging	SAGA-dominated	0.161248	-0.216587	rest	31.5567	33.0047	-1.44793	28.5961	34.1048	-5.50862
YBR127C	2	493383	36.4091	33.1752	492840	ARS216.1	1840	opposite	1	leading	TFIID-dominated	0.580673	0.594437	rest	30.1178	30.5183	-0.400552	34.9819	31.8877	3.09417
YBR128C	2	494695	37.074	33.5235	494160	ARS216.1	3160	opposite	1	leading	ND	0.269498	-0.803158	rest	31.2501	36.0863	-4.83623	32.3689	30.7856	1.58325
YBR129C	2	495871	40.0685	33.6564	495330	ARS216.1	4330	opposite	1	leading	TFIID-dominated	0.314748	-0.375108	rest	38.4444	37.7287	0.715746	35.8785	33.6659	2.21263
YBR131W	2	496643	40.7948	33.7384	497220	ARS217.0	-6180	opposite	0	lagging	TFIID-dominated	ND	ND	ND	36.5464	39.3679	-2.82142	33.036	38.0261	-4.99016
YBR130C	2	497431	39.5482	33.7357	496890	ARS216.1	5890	opposite	1	leading	TFIID-dominated	ND	ND	ND	37.3092	38.093	-0.783811	38.0428	34.0879	3.95486
YBR131C-A	2	498232	38.2191	33.7337	497700	ARS217.0	-5700	same	0	lagging	ND	ND	ND	ND	37.3273	37.9833	-0.656031	35.0407	38.7613	-3.72051
YBR132C	2	502055	45.4857	33.8101	501510	ARS217.0	-1890	same	0	lagging	SAGA-dominated	-0.442689	-0.263104	rest	40.0849	41.2853	-1.20041	41.7987	44.666	-2.8673
YBR134W	2	503736	49.4284	34.2447	504300	ARS217.1	-700	opposite	0.333333	lagging	TFIID-dominated	ND	ND	ND	41.1412	39.314	1.82721	46.4167	46.3721	0.0446302
YBR135W	2	504259	50.3462	34.3634	504840	ARS217.1	-160	opposite	0.333333	lagging	TFIID-dominated	ND	ND	ND	40.6854	39.056	1.62938	45.2168	44.9508	0.265996
YBR133C	2	504927	50.9975	34.2447	504390	ARS217.1	-610	same	0.333333	lagging	TFIID-dominated	0.296373	0.35757	G2	40.7834	39.3143	1.46906	43.1203	43.5153	-0.394987
YBR136W	2	505123	50.9975	34.6237	505710	ARS217.1	710	same	1	leading	TFIID-dominated	-0.690145	-0.252227	rest	40.8631	40.4602	0.4029	43.8968	43.1333	0.763528
YBR137W	2	512459	47.8807	37.8063	513030	ARS217.3	-1570	opposite	ND	lagging	TFIID-dominated	ND	ND	ND	40.6223	41.0666	-0.444339	47.7905	46.2712	1.5193
YBR139W	2	515147	49.2671	38.514	515730	ARS217.3	1130	same	ND	leading	SAGA-dominated	ND	ND	ND	40.374	41.7733	-1.39933	43.597	44.7825	-1.18548
YBR138C	2	515911	49.7234	38.4267	515370	ARS217.3	770	opposite	ND	leading	TFIID-dominated	-0.475698	-0.760713	M	42.1388	40.9747	1.1641	45.7074	48.6936	-2.98622
YBR141W-A	2	526660	57.0659	40.7479	527250	ARS217.6	650	same	ND	leading	ND	ND	ND	ND	42.092	44.3081	-2.21615	49.4005	52.6002	-3.19976
YBR142W	2	527739	60.0065	41.1943	528300	ARS217.6	1700	same	ND	leading	TFIID-dominated	ND	ND	ND	41.5329	43.2168	-1.68394	49.7264	48.0644	1.66199
YBR141C	2	528551	60.6853	41.1943	528000	ARS217.6	1400	opposite	ND	leading	ND	-0.0236269	0.120286	rest	42.1436	44.4379	-2.29431	50.4251	52.2512	-1.82616
YBR145W	2	533099	50.455	42.5795	533670	ARS218.0	-2930	opposite	ND	lagging	SAGA-dominated	ND	ND	ND	42.1904	40.868	1.32239	46.4207	48.3047	-1.88394
YBR143C	2	532759	49.9986	42.3546	532200	ARS218.0	-4400	same	ND	lagging	TFIID-dominated	0.714151	1.1893	rest	40.9081	41.8142	-0.906057	46.8335	47.3676	-0.534022
YBR144C	2	534042	51.7393	42.5795	533490	ARS218.0	-3110	same	ND	lagging	TFIID-dominated	ND	ND	ND	41.9846	43.2715	-1.28683	41.5084	50.5875	-9.0791
YBR146W	2	534691	51.531	42.7801	535260	ARS218.0	-1340	opposite	ND	lagging	TFIID-dominated	0.534206	-0.191876	rest	41.9245	40.302	1.62243	45.2089	46.1263	-0.917314
YBR147W	2	536068	48.2634	42.9981	536640	ARS218.0	40	same	ND	leading	SAGA-dominated	-0.666627	-0.571054	rest	39.4102	41.837	-2.42676	49.8039	47.7134	2.09047
YBR148W	2	537427	48.7601	43.1513	537990	ARS218.1	-610	opposite	0	lagging	ND	-0.893904	-1.00446	rest	41.1822	39.429	1.75319	45.5159	51.6835	-6.16763
YBR149W	2	539315	54.9473	43.3928	539880	ARS218.2	-720	opposite	ND	lagging	SAGA-dominated	-0.0677269	0.248106	rest	41.7763	41.83	-0.0536462	50.8055	49.9195	0.88592
YBR151W	2	544379	59.4422	42.6489	544950	ARS218.4	750	same	ND	leading	TFIID-dominated	ND	ND	ND	42.284	46.1334	-3.84942	55.795	55.5351	0.25988
YBR150C	2	545015	60.3735	42.6489	544470	ARS218.4	270	opposite	ND	leading	TFIID-dominated	-0.235448	-0.114039	rest	40.0412	40.7975	-0.756287	47.3695	48.6643	-1.29476
YBR152W	2	545869	62.9482	42.1316	546450	ARS218.4	2250	same	ND	leading	TFIID-dominated	-0.567002	-0.243235	rest	43.8448	45.444	-1.59918	52.9336	55.3744	-2.44088
YBR153W	2	546953	63.8919	41.7987	547530	ARS218.5	-2270	opposite	ND	lagging	TFIID-dominated	-0.152127	0.365409	rest	42.8705	43.4976	-0.627088	51.0921	51.1907	-0.0985932
YBR155W	2	549203	66.397	41.1875	549780	ARS218.5	-20	opposite	ND	lagging	TFIID-dominated	ND	ND	ND	46.1393	47.0299	-0.890593	55.9547	57.855	-1.9003
YBR154C	2	549623	66.74	41.2738	549090	ARS218.5	-710	same	ND	lagging	TFIID-dominated	1.18721	0.303258	rest	44.8771	42.6205	2.25662	53.8095	55.9353	-2.12577
YBR156C	2	553743	71.9762	41.3983	553200	ARS218.6	-2600	same	1	lagging	TFIID-dominated	-0.19196	0.114092	rest	44.2617	48.934	-4.67227	57.6036	60.7631	-3.15951
YBR158W	2	555779	73.6366	42.8025	556350	ARS218.6	550	same	1	leading	SAGA-dominated	1.11225	-0.274261	M/G1	45.7887	45.1427	0.64606	55.0025	53.3778	1.62471
YBR157C	2	556095	73.9466	42.5173	555540	ARS218.6	-260	same	1	lagging	SAGA-dominated	0.378706	0.143309	M/G1	44.2242	49.1782	-4.95408	58.2361	59.2331	-0.997022
YBR159W	2	558178	73.802	44.2643	558750	ARS218.6	2950	same	1	leading	TFIID-dominated	0.580456	0.0563448	rest	46.8963	44.2685	2.62782	56.795	56.5788	0.216175
YBR160W	2	559459	75.027	45.055	560040	ARS218.6	4240	same	1	leading	TFIID-dominated	0.199456	0.592675	rest	50.3301	53.3889	-3.0588	55.2825	54.3484	0.934158
YBR161W	2	560987	75.5633	45.7243	561570	ARS218.6	5770	same	1	leading	TFIID-dominated	0.292248	0.399645	G1	43.2121	48.9813	-5.76914	50.8081	51.0659	-0.257805
YBR162W-A	2	564675	72.8761	46.5405	565260	ARS218.6	9460	same	1	leading	TFIID-dominated	ND	ND	ND	48.1709	51.9011	-3.73015	53.4138	52.6184	0.795416
YBR162C	2	565335	71.6528	46.5067	564780	ARS218.6	8980	opposite	1	leading	TFIID-dominated	1.07879	1.75049	rest	43.3114	48.6739	-5.36247	51.7142	57.5793	-5.86512
YBR163W	2	565123	72.3416	46.5427	565710	ARS218.6	9910	same	1	leading	TFIID-dominated	0.412016	-0.0223595	rest	45.5104	49.1845	-3.67413	51.2617	52.2034	-0.941639
YBR165W	2	568267	62.4017	45.8864	568830	ARS218.6	13030	same	1	leading	TFIID-dominated	ND	ND	ND	46.4315	45.6567	0.7748	52.0693	52.0662	0.00318784
YBR164C	2	569047	62.3914	45.8864	568500	ARS218.6	12700	opposite	1	leading	TFIID-dominated	0.242206	0.163495	rest	44.9634	47.3288	-2.36538	54.5426	53.1974	1.34515
YBR166C	2	571743	59.0003	44.5306	571200	ARS219.0	-11800	same	0.7	lagging	TFIID-dominated	ND	ND	ND	42.5495	44.6099	-2.06035	49.4564	49.0335	0.422917
YBR168W	2	571499	59.4304	43.8311	572070	ARS219.0	-10930	opposite	0.7	lagging	TFIID-dominated	ND	ND	ND	46.695	46.663	0.0320172	56.23	58.2077	-1.97771
YBR167C	2	572703	58.824	43.8311	572160	ARS219.0	-10840	same	0.7	lagging	TFIID-dominated	-0.0211269	-0.167553	rest	44.3105	45.7245	-1.41398	49.6425	53.346	-3.70343
YBR169C	2	576559	55.6759	41.0357	576000	ARS219.0	-7000	same	0.7	lagging	SAGA-dominated	-0.451564	-0.550647	rest	44.3429	43.4416	0.901271	49.6577	49.5417	0.115928
YBR171W	2	577819	54.4372	40.1705	578400	ARS219.0	-4600	opposite	0.7	lagging	TFIID-dominated	ND	ND	ND	40.1004	43.715	-3.61463	49.7342	50.2255	-0.49137
YBR170C	2	578631	52.0056	40.1705	578100	ARS219.0	-4900	same	0.7	lagging	TFIID-dominated	0.0398731	0.047845	rest	43.45	42.8871	0.562884	47.7687	48.5929	-0.824197
YBR172C	2	581983	44.0387	39.6549	581430	ARS219.0	-1570	same	0.7	lagging	TFIID-dominated	0.434423	0.992902	rest	40.5399	42.6656	-2.12566	42.9914	47.4683	-4.47684
YBR175W	2	581883	44.0387	39.6401	582450	ARS219.0	-550	opposite	0.7	lagging	TFIID-dominated	ND	ND	ND	41.2987	40.3539	0.944801	40.1746	40.5769	-0.402231
YBR173C	2	582703	45.2471	39.6401	582150	ARS219.0	-850	same	0.7	lagging	TFIID-dominated	ND	ND	ND	41.7153	42.2662	-0.550918	41.2696	41.6932	-0.423615
YBR174C	2	583146	45.8166	39.6293	582600	ARS219.0	-400	same	0.7	lagging	TFIID-dominated	ND	ND	ND	40.732	42.5252	-1.79319	38.9624	40.4335	-1.47111
YBR176W	2	583131	45.8166	39.6051	583710	ARS219.0	710	same	1	leading	TFIID-dominated	0.272706	-0.242958	rest	39.5919	40.2425	-0.650552	39.5746	41.1233	-1.54867
YBR178W	2	585565	45.7825	39.3484	586140	ARS219.1	340	same	ND	leading	TFIID-dominated	ND	ND	ND	38.9701	39.8177	-0.84756	41.6669	36.4463	5.22052
YBR177C	2	586719	44.3272	39.3484	586170	ARS219.1	370	opposite	ND	leading	TFIID-dominated	0.0634445	0.295684	rest	38.7991	36.8802	1.91881	38.0474	32.3898	5.65764
YBR180W	2	589235	50.548	38.0428	589800	ARS219.3	400	same	1	leading	ND	ND	ND	ND	46.1542	38.4975	7.65672	34.9034	35.7955	-0.892053
YBR179C	2	589703	48.3767	38.2954	589170	ARS219.3	-230	same	nd	lagging	TFIID-dominated	-0.403445	-0.239003	rest	38.2062	39.56	-1.35376	36.977	36.1733	0.803707
YBR181C	2	593327	45.9797	36.4242	592770	ARS219.4	-1030	same	1	lagging	TFIID-dominated	1.50012	1.29903	rest	38.7164	39.6946	-0.978181	33.8119	38.7462	-4.93426
YBR182C	2	595519	46.1787	35.3646	594960	ARS219.4	1160	opposite	0.333333	leading	SAGA-dominated	-0.398182	-0.392282	rest	33.035	33.3424	-0.307406	33.376	34.9598	-1.58383
YBR183W	2	595403	46.1787	35.2055	595980	ARS219.4	2180	same	0.333333	leading	SAGA-dominated	ND	ND	ND	36.434	36.6626	-0.228618	41.3669	39.4492	1.91771
YBR182C-A	2	596049	46.0486	35.2055	595500	ARS219.4	1700	opposite	0.333333	leading	ND	-0.587627	-1.72042	ND	32.8879	33.2529	-0.365022	34.0223	38.717	-4.69472
YBR184W	2	596843	46.9754	34.8304	597420	ARS219.5	-1180	opposite	0	lagging	TFIID-dominated	-0.797841	-0.508412	rest	35.2834	37.5941	-2.31068	38.8996	40.5475	-1.64797
YBR186W	2	600047	45.6452	34.4676	600630	ARS219.5.0	-1970	opposite	0	lagging	ND	ND	ND	ND	41.4253	40.3578	1.06758	46.1421	44.9489	1.1932
YBR185C	2	600495	46.6639	34.4841	599940	ARS219.5	1340	opposite	nd	leading	TFIID-dominated	-0.257502	-0.508211	rest	39.5664	40.0968	-0.53047	43.7336	45.3013	-1.5677
YBR187W	2	602003	49.1793	34.4386	602580	ARS219.5.0	-20	opposite	0	lagging	TFIID-dominated	0.717873	0.855687	rest	41.18	41.969	-0.789036	46.7178	44.8532	1.86454
YBR189W	2	603963	45.4842	34.3542	604530	ARS219.5.1	-1670	opposite	0	lagging	TFIID-dominated	ND	ND	ND	38.8092	40.2122	-1.40301	39.9254	42.2858	-2.36042
YBR188C	2	604679	42.5488	34.3542	604140	ARS219.5.0	1540	opposite	nd	leading	TFIID-dominated	0.761373	-0.242374	rest	41.8887	40.6648	1.22395	44.7141	40.8221	3.892
YBR191W	2	605764	38.1416	33.9831	606330	ARS219.5.1	130	same	nd	leading	TFIID-dominated	2.02712	1.69201	rest	36.3115	37.5972	-1.28574	38.4611	37.492	0.96909
YBR190W	2	605460	39.1785	34.1101	606030	ARS219.5.1	-170	opposite	0	lagging	ND	ND	ND	ND	37.7547	34.2292	3.52555	37.3582	36.7153	0.64287
YBR192W	2	606955	35.7714	33.6585	607530	ARS219.5.2	-1070	opposite	0	lagging	TFIID-dominated	0.704373	0.147737	rest	38.8947	40.1815	-1.28687	37.3688	37.5201	-0.151238
YBR191W-A	2	606643	36.6621	33.6585	607230	ARS219.5.1	1030	same	nd	leading	ND	ND	ND	ND	35.7419	37.4649	-1.72305	38.076	36.2824	1.79362
YBR194W	2	609411	37.633	32.4804	609990	ARS219.5.2	1390	same	nd	leading	TFIID-dominated	ND	ND	ND	36.4961	35.5457	0.95037	36.587	34.8468	1.74025
YBR193C	2	610303	37.0879	32.4804	609750	ARS219.5.2	1150	opposite	nd	leading	TFIID-dominated	-0.460794	-0.418692	rest	40.298	37.5986	2.69938	37.6292	37.2736	0.355579
YBR195C	2	612415	29.3088	31.2394	611880	ARS219.5.3	-1920	same	1	lagging	TFIID-dominated	0.313409	0.0901662	rest	32.4057	29.7239	2.68182	32.1514	29.4042	2.74725
YBR196C	2	614463	32.885	29.8518	613920	ARS219.5.3	120	opposite	0	leading	TFIID-dominated	ND	ND	ND	36.2839	37.0391	-0.755226	34.6782	33.1973	1.48088
YBR196C-A	2	614667	32.885	29.5089	614130	ARS219.5.3	330	opposite	0	leading	ND	1.40237	0.199908	ND	36.3159	35.7156	0.600301	32.3969	32.6216	-0.224732
YBR196C-B	2	615124	33.6449	29.1772	614580	ARS219.5.3	780	opposite	0	leading	ND	1.20637	0.836346	ND	35.6778	35.4796	0.198196	33.3927	30.8829	2.50975
YBR197C	2	616375	34.4899	28.5644	615840	ARS219.5.4	40	opposite	0	leading	TFIID-dominated	0.690373	0.445178	rest	34.2221	33.2273	0.99487	32.6516	28.7595	3.89202
YBR199W	2	618315	33.8352	27.2216	618900	ARS220.0	300	same	1	leading	TFIID-dominated	ND	ND	ND	25.7318	22.5313	3.20048	22.3344	21.1679	1.16644
YBR198C	2	619095	35.0867	27.2216	618540	ARS220.0	-60	same	nd	lagging	TFIID-dominated	0.0541509	0.158598	rest	30.4026	32.3898	-1.98716	27.0262	31.7689	-4.74267
YBR200W	2	620315	37.1664	26.6305	620880	ARS220.0	2280	same	1	leading	TFIID-dominated	-0.223682	-0.759998	M	22.9528	20.3087	2.64409	18.6743	18.3433	0.331038
YBR200W-A	2	622477	36.0907	26.343	623040	ARS220.0	4440	same	1	leading	ND	0.312873	-2.23177	ND	30.2144	24.7483	5.46613	23.2771	26.4307	-3.15355
YBR201W	2	622931	35.1519	26.3499	623520	ARS220.0	4920	same	1	leading	TFIID-dominated	-0.387984	-0.890588	rest	31.1832	32.7298	-1.54669	23.9328	29.7345	-5.80169
YBR202W	2	625187	32.7874	26.9244	625770	ARS221.0	-2830	opposite	0.5	lagging	TFIID-dominated	0.00314234	-1.02194	M	32.0027	31.3714	0.631341	27.6837	33.0298	-5.34604
YBR201C-A	2	625543	34.0588	26.7458	624990	ARS221.0	-3610	same	0.5	lagging	ND	ND	ND	ND	34.4689	34.2537	0.21522	28.0203	24.9759	3.04432
YBR203W	2	628435	40.8564	28.2725	629010	ARS221.0	410	same	1	leading	TFIID-dominated	-0.893991	-0.151705	rest	27.6953	30.8775	-3.18219	27.613	30.3387	-2.72571
YBR205W	2	633116	35.1927	29.9573	633690	ARS221.2	290	same	1	leading	TFIID-dominated	ND	ND	ND	35.2924	36.4363	-1.14389	35.5094	32.0588	3.4506
YBR204C	2	633919	35.9468	29.8697	633360	ARS221.2	-40	same	nd	lagging	TFIID-dominated	-0.635377	-0.640737	M/G1	28.3027	33.6863	-5.3836	31.3235	34.8714	-3.54784
YBR206W	2	634095	36.4915	30.0736	634680	ARS221.3	680	same	1	leading	TFIID-dominated	ND	ND	ND	37.3596	38.9573	-1.59767	36.755	33.8883	2.86673
YBR207W	2	634563	37.2161	30.1062	635130	ARS221.3	1130	same	1	leading	TFIID-dominated	0.141406	0.21983	rest	32.9355	35.5878	-2.65225	36.3864	33.5708	2.81561
YBR209W	2	642077	64.8656	31.0361	642660	ARS221.4	860	same	0.7	leading	ND	ND	ND	ND	42.7663	49.1329	-6.36656	55.7924	56.2786	-0.486275
YBR208C	2	643167	63.1036	31.0361	642630	ARS221.4	830	opposite	0.7	leading	SAGA-dominated	-0.485627	-0.25036	rest	38.4226	39.1339	-0.71128	40.2664	41.5825	-1.3161
YBR210W	2	644835	57.1729	32.8214	645420	ARS221.4	3620	same	0.7	leading	TFIID-dominated	0.203873	-0.390981	rest	43.339	44.7374	-1.39839	52.8086	51.5131	1.29548
YBR212W	2	646947	62.9522	34.8709	647520	ARS221.4	5720	same	0.7	leading	TFIID-dominated	ND	ND	ND	46.2988	46.797	-0.498142	57.9804	57.6614	0.319035
YBR211C	2	647735	65.7291	34.8709	647190	ARS221.4	5390	opposite	0.7	leading	TFIID-dominated	-0.0696269	-0.344897	rest	44.6203	45.9471	-1.32683	56.0386	55.5313	0.507336
YBR213W	2	649747	73.0458	38.1881	650310	ARS221.4	8510	same	0.7	leading	TFIID-dominated	-0.231002	-0.0851561	rest	44.076	45.2797	-1.20376	53.1983	58.6867	-5.48845
YBR214W	2	650819	73.9354	39.2124	651390	ARS221.4	9590	same	0.7	leading	TFIID-dominated	-0.658294	-0.0430882	rest	41.1341	44.0804	-2.94627	52.9406	48.2786	4.662
YBR215W	2	652787	75.256	41.0198	653370	ARS221.4	11570	same	0.7	leading	TFIID-dominated	-0.31927	0.25042	rest	44.2829	45.4135	-1.13059	57.4357	59.4604	-2.02469
YBR217W	2	657275	76.8816	43.7865	657840	ARS221.4	16040	same	0.7	leading	TFIID-dominated	ND	ND	ND	46.2257	48.9095	-2.68376	55.5393	53.4231	2.11629
YBR216C	2	658135	81.6359	43.7865	657600	ARS221.4	15800	opposite	0.7	leading	TFIID-dominated	ND	ND	ND	45.8056	48.1316	-2.32598	55.8641	54.6959	1.16822
YBR218C	2	662871	70.1369	44.8485	662340	ARS221.5.0	-20260	same	ND	lagging	SAGA-dominated	-0.0610884	0.394175	rest	46.9566	47.5444	-0.587865	55.8726	54.2142	1.65842
YBR219C	2	663797	68.0602	44.8356	663240	ARS221.5.0	-19360	same	ND	lagging	TFIID-dominated	-0.278294	0.315667	rest	49.25	45.9268	3.32327	57.9591	50.1681	7.79096
YBR220C	2	665171	68.5958	44.6301	664620	ARS221.5.0	-17980	same	ND	lagging	TFIID-dominated	0.448498	0.0265608	rest	45.5557	45.848	-0.292315	60.5799	56.2059	4.37406
YBR221W-A	2	666032	68.8253	44.0645	666600	ARS221.5.0	-16000	opposite	ND	lagging	ND	ND	ND	ND	45.0434	44.1639	0.879592	54.4909	52.8138	1.67719
YBR221C	2	666975	68.3917	44.229	666420	ARS221.5.0	-16180	same	ND	lagging	TFIID-dominated	0.0818731	0.654998	rest	44.1786	45.0439	-0.86536	57.2726	55.0709	2.20169
YBR223W-A	2	668215	67.7425	43.3583	668790	ARS221.5.0	-13810	opposite	ND	lagging	ND	ND	ND	ND	47.5397	46.8714	0.668278	59.6962	55.2341	4.46212
YBR222C	2	668887	67.2838	43.5341	668340	ARS221.5.0	-14260	same	ND	lagging	TFIID-dominated	-0.292627	0.278913	rest	48.9667	45.407	3.55969	55.8304	53.6602	2.17022
YBR224W	2	669619	67.7144	42.8825	670200	ARS221.5.0	-12400	opposite	ND	lagging	ND	ND	ND	ND	47.5538	44.504	3.04981	55.893	53.4869	2.40613
YBR225W	2	670121	67.664	42.7506	670710	ARS221.5.0	-11890	opposite	ND	lagging	TFIID-dominated	ND	ND	ND	46.4973	43.685	2.81229	57.029	54.0099	3.01909
YBR223C	2	670831	66.2806	42.8825	670290	ARS221.5.0	-12310	same	ND	lagging	TFIID-dominated	-0.65021	-0.460438	rest	47.7473	45.8985	1.84882	57.3836	52.4114	4.97228
YBR226C	2	674059	61.4395	42.4282	673500	ARS221.5.0	-9100	same	ND	lagging	TFIID-dominated	ND	ND	ND	45.9336	44.2229	1.71072	60.6336	55.8123	4.82131
YBR228W	2	674811	60.3818	42.6599	675390	ARS221.5.0	-7210	opposite	ND	lagging	TFIID-dominated	ND	ND	ND	45.8199	44.1233	1.69652	55.3648	55.2816	0.083199
YBR227C	2	675628	59.4657	42.6599	675090	ARS221.5.0	-7510	same	ND	lagging	TFIID-dominated	-0.344927	-0.168964	rest	43.7887	43.4515	0.337221	58.8451	54.4418	4.40328
YBR229C	2	679743	63.9086	43.8719	679200	ARS221.5.0	-3400	same	ND	lagging	TFIID-dominated	-0.440294	-0.189347	rest	45.2234	44.2198	1.00362	52.4407	54.0761	-1.63533
YBR230W-A	2	679779	63.9086	43.9893	680340	ARS221.5.0	-2260	opposite	ND	lagging	ND	ND	ND	ND	48.1454	43.2464	4.89898	50.5693	57.9311	-7.36178
YBR230C	2	680591	65.3653	43.9893	680040	ARS221.5.0	-2560	same	ND	lagging	TFIID-dominated	1.48946	0.350834	rest	48.3098	44.7218	3.58801	57.805	58.6483	-0.843291
YBR233W	2	682803	58.0686	43.3225	683370	ARS221.5.0	770	same	ND	leading	TFIID-dominated	ND	ND	ND	41.1798	42.9245	-1.7447	49.4185	51.0374	-1.61892
YBR231C	2	683655	57.0075	43.3225	683100	ARS221.5.0	500	opposite	ND	leading	TFIID-dominated	-0.0617519	-0.0431098	rest	43.8783	45.863	-1.98468	57.4956	59.4674	-1.97185
YBR232C	2	684226	57.7025	43.0732	683670	ARS221.5.0	1070	opposite	ND	leading	TFIID-dominated	ND	ND	ND	42.0568	42.8098	-0.75304	49.7272	50.7769	-1.04966
YBR233W-A	2	684435	58.6231	42.4906	685020	ARS221.5.0	2420	same	ND	leading	ND	ND	ND	ND	43.5884	43.0579	0.530568	52.4051	52.65	-0.244937
YBR235W	2	686315	57.2565	41.1554	686880	ARS221.5.0	4280	same	ND	leading	TFIID-dominated	ND	ND	ND	42.341	42.2883	0.0526482	49.7385	48.4234	1.31507
YBR234C	2	687135	56.565	41.1554	686580	ARS221.5.0	3980	opposite	ND	leading	TFIID-dominated	0.000273109	0.209591	rest	44.4044	41.4442	2.96028	50.9393	52.298	-1.35869
YBR237W	2	691419	53.4198	38.6676	691980	ARS221.5.0	9380	same	ND	leading	ND	ND	ND	ND	37.6405	39.465	-1.82451	45.9399	44.2894	1.65056
YBR236C	2	692231	52.1108	38.6676	691680	ARS221.5.0	9080	opposite	ND	leading	TFIID-dominated	-0.25746	0.121857	rest	42.996	43.1543	-0.158216	54.1207	52.6032	1.51743
YBR238C	2	697887	40.5502	38.375	697350	ARS222.0	-4050	same	1	lagging	TFIID-dominated	0.182555	-0.130229	rest	38.257	39.4063	-1.14926	40.0525	45.0017	-4.94921
YBR239C	2	700655	36.5636	38.1525	700110	ARS222.0	-1290	same	1	lagging	TFIID-dominated	0.00465882	0.11886	rest	37.3843	28.8247	8.55955	40.1141	32.2025	7.91158
YBR240C	2	702903	36.4672	37.6333	702360	ARS222.0	960	opposite	0	leading	SAGA/TFIID	-1.10802	-0.807576	rest	36.8983	34.1505	2.74781	35.8102	35.541	0.269163
YBR242W	2	704011	39.8667	36.8767	704580	ARS222.1	1180	same	0.5	leading	TFIID-dominated	ND	ND	ND	40.5564	38.3373	2.21908	40.7489	38.0489	2.7
YBR241C	2	704639	41.1413	36.8767	704100	ARS222.1	700	opposite	0.5	leading	TFIID-dominated	-1.31529	-0.501005	rest	35.962	33.5766	2.3854	34.1595	32.5205	1.63901
YBR244W	2	706811	42.4793	35.669	707400	ARS222.5.0	400	same	1	leading	SAGA-dominated	ND	ND	ND	36.9166	37.7092	-0.792555	39.2648	40.8514	-1.58662
YBR243C	2	707335	42.6232	35.8494	706800	ARS222.5.0	-200	same	nd	lagging	TFIID-dominated	-0.0321269	0.154171	G2	36.8395	38.3766	-1.53712	39.5723	36.6621	2.91013
YBR246W	2	711051	50.7255	34.8743	711630	ARS222.5.1	2630	same	ND	leading	TFIID-dominated	ND	ND	ND	38.7129	40.7292	-2.01632	40.3942	40.0969	0.297267
YBR245C	2	711887	49.8579	34.8905	711330	ARS222.5.1	2330	opposite	ND	leading	TFIID-dominated	-0.215896	0.240884	rest	37.4678	37.0765	0.391298	38.0646	37.066	0.998623
YBR247C	2	714991	51.545	35.0178	714450	ARS223.0	-550	same	ND	lagging	TFIID-dominated	0.388248	0.586768	rest	40.2463	38.9417	1.30457	48.2726	44.445	3.82754
YBR248C	2	717055	51.131	35.5308	716520	ARS223.0	1520	opposite	ND	leading	SAGA-dominated	0.38323	0.754553	rest	38.909	39.5276	-0.618639	40.8913	44.2219	-3.33063
YBR250W	2	717827	50.1633	35.9404	718410	ARS223.1	-2190	opposite	ND	lagging	TFIID-dominated	ND	ND	ND	36.467	34.9554	1.51156	39.1286	39.3541	-0.225463
YBR249C	2	718623	49.1446	35.9404	718080	ARS223.1	-2520	same	ND	lagging	SAGA/TFIID	0.861873	1.15967	rest	37.9712	38.7878	-0.816558	39.9902	40.635	-0.644738
YBR251W	2	720819	50.0489	36.5311	721380	ARS223.1	780	same	ND	leading	TFIID-dominated	-0.0405436	0.0395669	rest	39.3954	43.4768	-4.08135	45.1989	46.1112	-0.912356
YBR252W	2	722075	51.974	36.5617	722640	ARS223.2	-360	opposite	0	lagging	TFIID-dominated	ND	ND	ND	38.878	39.4604	-0.582451	41.2698	44.608	-3.33818
YBR253W	2	722715	52.5368	36.5222	723300	ARS223.2	300	same	0.666667	leading	TFIID-dominated	0.912373	0.727763	rest	38.6143	38.3123	0.302006	41.295	37.5466	3.74846
YBR255W	2	723891	54.3961	36.3624	724470	ARS223.2	1470	same	0.666667	leading	TFIID-dominated	ND	ND	ND	41.9724	40.0318	1.94058	46.0956	46.1641	-0.0684887
YBR254C	2	724783	55.5284	36.3624	724230	ARS223.2	1230	opposite	0.666667	leading	TFIID-dominated	0.444206	-0.0860191	rest	38.721	38.4575	0.263567	43.961	39.0433	4.91773
YBR255C-A	2	727607	55.497	35.2883	727050	ARS223.3	50	opposite	ND	leading	ND	0.376873	0.451095	ND	43.6319	41.9144	1.71752	42.9417	43.5611	-0.619334
YBR257W	2	728339	56.4779	34.6207	728910	ARS223.3	1910	same	ND	leading	TFIID-dominated	ND	ND	ND	41.485	41.3037	0.181368	47.7425	48.8432	-1.10076
YBR256C	2	728647	57.4317	34.8346	728100	ARS223.3	1100	opposite	ND	leading	TFIID-dominated	0.0796731	0.835421	G2	41.9497	42.1311	-0.18144	46.1948	44.8105	1.38426
YBR259W	2	729835	56.2521	34.1216	730410	ARS223.3	3410	same	ND	leading	TFIID-dominated	ND	ND	ND	39.9866	40.9065	-0.919922	44.5856	43.4225	1.16312
YBR258C	2	730695	53.2672	34.1216	730140	ARS223.3	3140	opposite	ND	leading	TFIID-dominated	0.122123	-0.397312	rest	40.5244	41.4563	-0.931975	47.1476	45.9045	1.24312
YBR260C	2	735151	46.6643	34.6482	734610	ARS224.0	-790	same	1	lagging	TFIID-dominated	-0.292939	0.0592983	rest	38.6962	40.8143	-2.11811	45.7834	43.2322	2.55112
YBR261C	2	736063	46.6214	35.1025	735510	ARS224.0	110	opposite	0.333333	leading	TFIID-dominated	0.269206	0.453317	rest	40.3019	37.5446	2.75732	42.5925	40.5366	2.05586
YBR263W	2	735683	46.8469	35.3479	736260	ARS224.0	860	same	0.333333	leading	TFIID-dominated	ND	ND	ND	40.4099	39.5936	0.816273	43.8791	43.0298	0.849332
YBR262C	2	736575	45.9073	35.3479	736020	ARS224.0	620	opposite	0.333333	leading	TFIID-dominated	0.517873	0.276381	rest	39.8905	36.9443	2.94626	43.0857	37.433	5.65264
YBR265W	2	738019	43.3308	36.3097	738600	ARS224.1	-400	opposite	ND	lagging	SAGA/TFIID	ND	ND	ND	39.4941	39.1198	0.374302	41.0243	42.8334	-1.80916
YBR264C	2	738887	44.1967	36.3097	738330	ARS224.1	-670	same	ND	lagging	TFIID-dominated	0.0797064	0.238836	rest	40.0689	43.0912	-3.0223	41.0847	42.4258	-1.34111
YBR267W	2	739315	44.1627	36.852	739890	ARS224.2	-710	opposite	0.5	lagging	TFIID-dominated	0.287206	0.782699	rest	39.6456	39.9346	-0.28901	35.9206	42.281	-6.36039
YBR266C	2	740882	42.2957	36.9733	740340	ARS224.2	-260	same	0.5	lagging	TFIID-dominated	ND	ND	ND	38.7893	38.8855	-0.0961897	35.7715	42.3975	-6.62592
YBR268W	2	740771	42.3856	37.1064	741360	ARS224.2	760	same	1	leading	TFIID-dominated	ND	0.235904	rest	41.3491	38.7232	2.62588	42.7755	34.8939	7.88158
YBR269C	2	743095	46.3971	37.006	742560	ARS224.3	-40	same	1	lagging	TFIID-dominated	0.494873	-0.14716	rest	38.2653	38.2462	0.0191136	35.9279	39.1674	-3.23945
YBR271W	2	744323	47.4855	36.3312	744900	ARS224.4	-900	opposite	ND	lagging	TFIID-dominated	ND	ND	ND	38.7713	38.9126	-0.141341	43.6663	39.6816	3.98477
YBR270C	2	745215	46.8276	36.3312	744660	ARS224.4	-1140	same	ND	lagging	TFIID-dominated	-0.205327	-0.275659	rest	39.2972	37.6689	1.62835	40.4175	41.0446	-0.627148
YBR272C	2	748319	50.6651	34.647	747780	ARS224.5	-1220	same	ND	lagging	TFIID-dominated	-0.637327	-0.410912	rest	35.9563	36.4863	-0.53	40.2809	39.3332	0.947648
YBR274W	2	749043	48.1859	33.8325	749610	ARS224.5	610	same	ND	leading	TFIID-dominated	ND	ND	ND	40.9219	40.5623	0.359567	47.3312	46.3324	0.998835
YBR273C	2	749895	47.775	33.8325	749340	ARS224.5	340	opposite	ND	leading	TFIID-dominated	ND	ND	ND	38.5459	41.7319	-3.18603	41.3954	45.6523	-4.2569
YBR275C	2	757735	51.7326	36.0564	757200	ARS225.0	3800	opposite	ND	leading	TFIID-dominated	-0.423236	0.27743	rest	38.1962	38.76	-0.563834	41.8184	42.4019	-0.583502
YBR278W	2	759755	50.4413	37.8922	760320	ARS225.0	6920	same	ND	leading	TFIID-dominated	ND	ND	ND	38.6396	36.9089	1.73077	48.047	41.0046	7.04241
YBR276C	2	760655	48.7531	37.8922	760110	ARS225.0	6710	opposite	ND	leading	TFIID-dominated	-0.300905	0.0985831	rest	36.8254	37.0852	-0.259779	43.0887	39.0681	4.02053
YBR279W	2	760715	48.7531	38.1466	761280	ARS225.0	7880	same	ND	leading	TFIID-dominated	0.179973	0.342706	rest	43.3711	41.1609	2.21019	49.7293	49.5383	0.19102
YBR277C	2	761111	48.7187	38.0442	760560	ARS225.0	7160	opposite	ND	leading	TFIID-dominated	ND	ND	ND	37.3047	35.9168	1.38788	47.6419	37.2235	10.4184
YBR280C	2	765215	53.1391	37.5034	764670	ARS227.0	-5130	same	ND	lagging	TFIID-dominated	-0.523877	-0.494549	rest	39.7182	41.688	-1.9698	44.3522	44.187	0.165177
YBR282W	2	767707	48.0926	35.153	768270	ARS227.0	-1530	opposite	ND	lagging	TFIID-dominated	ND	ND	ND	38.3016	35.942	2.35961	38.688	42.4425	-3.75451
YBR281C	2	768159	47.2442	35.5197	767610	ARS227.0	-2190	same	ND	lagging	TFIID-dominated	-0.514809	-0.24966	rest	40.4414	39.1815	1.25991	45.5672	47.8054	-2.23827
YBR284W	2	770387	45.1633	33.5904	770970	ARS227.1	-830	opposite	0	lagging	TFIID-dominated	ND	ND	ND	36.4269	37.7617	-1.33483	37.8797	40.1414	-2.26177
YBR283C	2	771103	45.6027	33.5904	770550	ARS227.0	750	opposite	ND	leading	TFIID-dominated	0.693016	0.881142	rest	37.6627	40.173	-2.51031	45.0466	45.2289	-0.182297
YBR285W	2	773275	47.5247	32.7502	773850	ARS227.2	50	same	ND	leading	ND	-0.0851269	-1.08729	rest	36.2617	37.3758	-1.11413	40.6451	39.0878	1.55724
YBR286W	2	774163	49.4741	32.7379	774750	ARS227.2	950	same	ND	leading	SAGA-dominated	0.604873	0.494471	rest	38.573	38.4759	0.0971822	39.572	41.2312	-1.65923
YBR287W	2	775995	51.7626	32.93	776580	ARS227.3	-2420	opposite	ND	lagging	SAGA-dominated	0.495373	0.408284	M	37.2478	37.4919	-0.244074	41.625	36.1875	5.43752
YBR289W	2	779147	48.4551	33.9793	779730	ARS227.3	730	same	ND	leading	TFIID-dominated	ND	ND	ND	37.6894	40.6728	-2.98343	41.7872	38.9119	2.87524
YBR288C	2	780023	48.0356	33.802	779490	ARS227.3	490	opposite	ND	leading	TFIID-dominated	0.16973	0.153495	rest	39.6358	41.7876	-2.15178	44.5578	44.6577	-0.0999119
YBR290W	2	782059	44.1813	35.0748	782640	ARS227.4	-360	opposite	ND	lagging	TFIID-dominated	0.267373	0.515246	rest	39.85	38.2831	1.56687	38.2304	38.7211	-0.490769
YBR291C	2	785127	43.4474	35.7537	784590	ARS228.0	-810	same	1	lagging	TFIID-dominated	0.0581231	-0.734335	rest	39.001	37.1188	1.88222	41.0485	39.4203	1.62822
YBR292C	2	785568	42.917	35.9138	785010	ARS228.0	-390	same	1	lagging	ND	ND	ND	ND	38.6108	37.2691	1.3417	40.0314	40.3618	-0.330371
YBR293W	2	786587	39.2623	36.5419	787170	ARS228.0	1770	same	1	leading	TFIID-dominated	0.297328	-0.0535928	rest	38.9832	35.7925	3.19072	36.6094	37.3871	-0.777696
YBR294W	2	788729	40.6735	37.1486	789300	ARS228.1	-300	opposite	0	lagging	TFIID-dominated	-0.484127	-0.193561	rest	31.6591	32.8719	-1.21282	32.4642	32.8397	-0.375529
YBR295W	2	792291	36.8757	37.6477	792870	ARS228.2	-130	opposite	0	lagging	TFIID-dominated	-0.74152	0.301307	rest	36.4229	36.3105	0.112357	32.3227	35.3738	-3.05109
YBR296C	2	799079	39.3079	36.997	798540	ARS228.5.0	-60	same	1	lagging	ND	-0.978718	-1.02735	M/G1	33.4034	33.4529	-0.0494823	30.419	33.2433	-2.82427
YBR297W	2	799979	37.9974	37.1059	800550	ARS229.0	750	same	0.5	leading	ND	ND	ND	ND	34.169	33.3851	0.783937	34.7508	29.7696	4.98117
YBR296C-A	2	800735	37.5443	37.1059	800190	ARS229.0	390	opposite	0.5	leading	ND	-0.863127	-0.666933	ND	36.4417	34.895	1.54669	36.391	31.1068	5.28417
YCL076W	3	891	82.0465	39.9919	1470	ARS300.0	70	same	ND	leading	ND	ND	ND	ND	45.1109	42.8107	2.30022	53.2899	45.6799	7.60999
YCL069W	3	9205	0	36.607	9780	ARS301.0	-1465	opposite	0.5	lagging	TFIID-dominated	ND	ND	ND	48.6286	48.0228	0.60581	0	0
YCL073C	3	8825	0	37.2772	8280	ARS301.0	-2965	same	0.5	lagging	SAGA/TFIID	0.196623	-1.04961	rest	46.026	47.1602	-1.13421	55.5966	51.3492	4.24741
YCL068C	3	12784	R	33.7018	12240	ARS302.0	837	opposite	ND	leading	TFIID-dominated	ND	ND	ND	0	0		0	0
YCL066W	3	12781	R	32.539	13350	ARS302.0	-1324	opposite	ND	lagging	TFIID-dominated	ND	ND	ND	43.3985	43.4032	-0.00476392	46.5115	43.0007	3.51079
YCL065W	3	13250	R	31.9509	13830	ARS302.0	-844	opposite	ND	lagging	TFIID-dominated	ND	ND	ND	40.5905	40.8641	-0.273593	41.8673	40.4757	1.39164
YCL067C	3	13517	R	33.1251	12960	ARS302.0	1557	opposite	ND	leading	SAGA-dominated	ND	ND	ND	0	0		0	0
YCL063W	3	16748	48.3008	28.7015	17310	ARS320.0	310	same	1	leading	TFIID-dominated	ND	ND	ND	43.1881	42.8056	0.382419	42.556	53.9254	-11.3693
YCL064C	3	17448	46.0602	28.7015	16890	ARS320.0	-110	same	nd	lagging	TFIID-dominated	0.711706	-0.179567	rest	41.8274	41.3111	0.516229	48.5437	46.2511	2.29261
YCL061C	3	22672	36.3952	24.4642	22140	ARS320.1	-1260	same	1	lagging	TFIID-dominated	-0.716172	0.147698	G1	42.7783	42.9921	-0.213779	50.734	43.3206	7.41337
YCL058W-A	3	23060	36.5846	23.2239	23640	ARS320.1	240	same	1	leading	ND	ND	ND	ND	43.2072	40.8128	2.3944	35.4176	36.707	-1.28933
YCL059C	3	23928	36.8747	23.2239	23370	ARS320.1	-30	same	1	lagging	TFIID-dominated	ND	ND	ND	43.3989	42.3511	1.04785	39.5083	36.8321	2.67618
YCL057W	3	24252	36.7495	22.3757	24840	ARS304.0	640	same	0.5	leading	TFIID-dominated	ND	ND	ND	36.0619	37.8639	-1.80209	31.654	33.0348	-1.38085
YCL057C-A	3	24824	37.2384	22.3757	24270	ARS304.0	70	opposite	0.5	leading	ND	0.0563731	0.181083	ND	41.3073	40.1467	1.16058	35.9124	35.6215	0.290887
YCL055W	3	27396	44.8738	19.1427	27960	ARS304.2	-640	opposite	0.5	lagging	SAGA-dominated	ND	ND	ND	27.4134	30.7187	-3.3053	28.249	25.9813	2.26768
YCL056C	3	27888	43.0645	19.6316	27330	ARS304.2	-1270	same	0.5	lagging	TFIID-dominated	0.524706	-0.668334	rest	29.1628	30.8238	-1.66103	30.6655	30.2725	0.393
YCL054W	3	30932	34.3182	15.7558	31500	ARS304.4	-300	opposite	0	lagging	TFIID-dominated	0.338151	0.400023	rest	26.1937	29.5417	-3.34795	26.2205	27.6695	-1.44901
YCL051W	3	35068	32.879	13.0632	35640	ARS304.6	1440	same	0.5	leading	TFIID-dominated	ND	ND	ND	20.4985	18.6517	1.84674	19.5849	17.8981	1.68674
YCL052C	3	35952	32.9013	13.0632	35400	ARS304.6	1200	opposite	0.5	leading	TFIID-dominated	-0.47871	-0.391874	rest	23.6079	24.5982	-0.990293	23.2933	24.0715	-0.778232
YCL050C	3	39368	35.0803	12.6436	38820	ARS305.0	-1780	same	1	lagging	TFIID-dominated	0.136623	-0.403836	rest	11.8586	9.62099	2.23761	12.246	11.3834	0.862601
YCL048W-A	3	40916	33.4591	13.4562	41490	ARS305.1	-310	opposite	0	lagging	ND	ND	ND	ND	19.0216	22.7033	-3.68172	19.436	22.9559	-3.5199
YCL049C	3	41304	33.4047	13.2296	40770	ARS305.0	170	opposite	nd	leading	TFIID-dominated	-0.48171	-0.707615	rest	17.4175	14.0235	3.39397	16.0728	14.4658	1.60703
YCL048W	3	41664	33.2836	13.7102	42240	ARS305.1	440	same	nd	leading	ND	ND	ND	ND	23.5137	23.6369	-0.123144	24.3742	22.994	1.38021
YCL047C	3	44952	30.1508	15.2701	44400	ARS305.1	2600	opposite	nd	leading	TFIID-dominated	ND	ND	ND	23.6292	22.857	0.772208	24.2578	23.4287	0.82908
YCL046W	3	46139	35.0204	16.6234	46710	ARS305.2	-1490	opposite	0	lagging	TFIID-dominated	ND	ND	ND	37.8927	34.2612	3.63147	27.1563	31.0391	-3.88278
YCL044C	3	48920	33.4623	17.8085	48390	ARS305.2	190	opposite	0	leading	TFIID-dominated	-0.0825555	-0.0950139	rest	36.0255	33.031	2.99454	34.0268	27.4821	6.54471
YCL042W	3	50083	33.8711	18.6266	50670	ARS305.3	-730	opposite	0.5	lagging	SAGA-dominated	ND	ND	ND	39.8304	39.0188	0.811542	35.2417	38.0325	-2.79081
YCL043C	3	50720	34.4305	18.4668	50190	ARS305.3	-1210	same	0.5	lagging	TFIID-dominated	0.844311	0.924325	M	37.0098	37.3221	-0.31226	38.3954	34.0587	4.33675
YCL040W	3	50337	33.8711	18.7521	50910	ARS305.3	-490	opposite	0.5	lagging	SAGA-dominated	-0.0816269	0.046633	M/G1	42.5446	38.6552	3.88939	35.1656	37.0729	-1.90732
YCL041C	3	51126	35.522	18.6266	50580	ARS305.3	-820	same	0.5	lagging	ND	ND	ND	ND	39.8287	38.6156	1.21315	47.4333	40.5287	6.90467
YCL039W	3	52124	40.159	18.9059	52710	ARS305.4	-290	opposite	0	lagging	ND	-0.865905	-0.00408253	rest	40.5497	39.5176	1.03209	44.7869	37.6352	7.15173
YCL038C	3	57112	36.0112	17.9095	56580	ARS305.4	3580	opposite	0	leading	TFIID-dominated	0.128464	-0.346066	M	29.1593	25.9453	3.21394	31.1943	28.4239	2.77042
YCL036W	3	58468	24.9742	16.9498	59040	ARS306.0	-3560	opposite	0.5	lagging	TFIID-dominated	ND	ND	ND	40.5226	39.0431	1.47953	34.9608	35.2477	-0.286952
YCL037C	3	59248	20.1	17.131	58710	ARS306.0	-3890	same	0.5	lagging	TFIID-dominated	0.700373	1.58819	rest	39.0447	38.6831	0.361589	45.4148	37.2199	8.19488
YCL034W	3	61116	30.4211	16.1828	61680	ARS306.0	-920	opposite	0.5	lagging	TFIID-dominated	ND	ND	ND	40.0839	39.2436	0.84031	42.8061	37.938	4.86805
YCL035C	3	61736	33.6805	16.3173	61200	ARS306.0	-1400	same	0.5	lagging	SAGA-dominated	0.913123	0.104911	rest	38.9299	37.4832	1.44676	34.5106	33.4638	1.04678
YCL032W	3	62900	34.2064	15.7241	63480	ARS306.0	880	same	0.333333	leading	TFIID-dominated	ND	ND	ND	29.9139	29.3635	0.550371	30.9658	32.734	-1.76821
YCL033C	3	63784	33.8592	15.8289	63240	ARS306.0	640	opposite	0.333333	leading	TFIID-dominated	ND	ND	ND	37.8692	40.4616	-2.59238	32.698	35.1649	-2.4669
YCL031C	3	66120	35.1748	15.3234	65580	ARS306.0	2980	opposite	0.333333	leading	TFIID-dominated	0.719273	0.397279	rest	26.5789	28.6398	-2.06087	29.9613	31.2347	-1.27347
YCL030C	3	68888	28.4913	14.5224	68340	ARS306.1	-2660	same	0.666667	lagging	SAGA-dominated	0.272723	0.75346	rest	28.0101	25.7804	2.22967	25.8288	28.3894	-2.5606
YCL028W	3	69588	26.3696	13.9477	70170	ARS306.1	-830	opposite	0.666667	lagging	TFIID-dominated	ND	ND	ND	22.9005	22.8704	0.0300883	22.5759	22.8517	-0.275821
YCL029C	3	70480	25.8707	13.9477	69930	ARS306.1	-1070	same	0.666667	lagging	TFIID-dominated	ND	ND	ND	39.4896	34.6448	4.84475	24.1912	24.7021	-0.51098
YCL027W	3	71302	29.4897	13.2647	71880	ARS306.1	880	same	1	leading	SAGA-dominated	-0.64096	-0.908349	M/G1	15.2998	15.3518	-0.0520073	15.6244	16.2612	-0.63679
YCL026C-B	3	74520	26.1343	11.9994	73980	ARS306.2	-20	same	1	lagging	ND	-1.04138	-1.05192	ND	13.1585	12.2953	0.863251	11.8058	12.6133	-0.807569
YCL026C-A	3	75784	25.8883	11.5186	75240	ARS306.3	-160	same	1	lagging	ND	-0.518027	-1.04381	ND	16.9147	17.8787	-0.963972	15.0936	13.7672	1.32636
YCL024W	3	78605	36.912	11.0307	79170	ARS306.4	570	same	1	leading	TFIID-dominated	ND	ND	ND	39.2552	26.0961	13.1591	32.2022	27.3141	4.88802
YCL025C	3	78481	36.912	10.7813	77940	ARS306.4	-660	same	nd	lagging	SAGA-dominated	-0.241809	0.30218	G2	22.6066	22.8892	-0.282538	21.7594	23.5539	-1.79456
YCL023C	3	79795	46.832	11.0307	79260	ARS306.4	660	opposite	1	leading	ND	ND	ND	ND	43.9632	25.2751	18.6881	34.5866	25.492	9.09461
YCL022C	3	82584	95.1643	14.6692	82050	ARS306.4	3450	opposite	1	leading	TFIID-dominated	ND	ND	ND	37.7101	31.6654	6.04468	37.4238	31.8925	5.53128
YCL021W-A	3	83119	0	18.3039	83700	ARS306.4	5100	same	1	leading	ND	-0.212794	-0.659565	ND	0	0		0	0
YCL018W	3	90613	R	30.3568	91200	ARS307.0	-12200	opposite	0.6	lagging	TFIID-dominated	0.544623	0.932838	rest	41.879	40.7462	1.13276	44.7443	41.6094	3.13488
YCL017C	3	94881	41.1726	28.0798	94350	ARS307.0	-9050	same	0.6	lagging	TFIID-dominated	-0.255698	0.30626	rest	40.6881	36.733	3.95513	41.6046	38.6243	2.98024
YCL014W	3	95685	40.3592	26.7967	96270	ARS307.0	-7130	opposite	0.6	lagging	TFIID-dominated	ND	ND	ND	38.548	37.7154	0.83265	36.8435	34.7892	2.05435
YCL016C	3	96297	39.9014	27.2217	95760	ARS307.0	-7640	same	0.6	lagging	TFIID-dominated	-0.922377	-0.273071	rest	40.1547	39.5542	0.600516	38.4402	37.3555	1.08476
YCL012C	3	102281	31.1286	23.7566	101730	ARS307.0	-1670	same	0.6	lagging	ND	ND	ND	ND	39.2274	31.6959	7.53155	37.7832	33.1616	4.62161
YCL010C	3	104905	26.3633	23.3292	104370	ARS307.0	970	opposite	0	leading	TFIID-dominated	0.0432481	0.654057	rest	28.8304	37.2103	-8.37989	29.5196	23.8058	5.71375
YCL008C	3	107377	33.9738	23.0337	106830	ARS307.1	630	opposite	0.5	leading	TFIID-dominated	ND	ND	ND	23.7912	23.0583	0.732908	24.8194	22.1555	2.66387
YCL005W	3	107469	33.9738	22.667	108030	ARS307.1	1830	same	0.5	leading	TFIID-dominated	ND	ND	ND	22.7956	21.8399	0.955749	24.1651	22.3799	1.78526
YCL007C	3	107865	34.9283	22.9293	107310	ARS307.1	1110	opposite	0.5	leading	TFIID-dominated	ND	ND	ND	22.2241	21.2485	0.975604	21.9615	20.8493	1.1122
YCL004W	3	108517	36.3605	22.321	109080	ARS307.1	2880	same	0.5	leading	TFIID-dominated	0.291998	-0.117015	rest	25.4135	22.0138	3.39974	25.6529	22.8426	2.81024
YCL001W	3	111341	41.4762	21.1136	111930	ARS308.0	-1470	opposite	0.333333	lagging	TFIID-dominated	ND	ND	ND	24.868	26.9864	-2.11841	25.6165	31.0167	-5.40023
YCL002C	3	112225	40.4116	21.1136	111690	ARS308.0	-1710	same	0.333333	lagging	ND	0.185248	0.060258	rest	23.7741	25.8794	-2.10529	24.6927	28.0051	-3.31235
YCL001W-A	3	112577	39.0408	20.3621	113160	ARS308.0	-240	opposite	0.333333	lagging	ND	0.243873	-0.723771	ND	25.4286	30.472	-5.04348	29.3792	31.4266	-2.04738
YCL001W-B	3	113267	36.7176	20.1619	113850	ARS308.0	450	same	1	leading	ND	-0.293877	-0.829785	ND	27.4577	24.6143	2.84339	26.9236	32.9765	-6.05296
YCR001W	3	115182	38.3895	19.8288	115770	ARS308.2	-430	opposite	0	lagging	ND	ND	ND	ND	32.9977	30.0163	2.9814	32.3629	29.4505	2.91247
YCR003W	3	118101	37.1066	20.7157	118680	ARS308.3	80	same	1	leading	TFIID-dominated	ND	ND	ND	33.5524	28.7349	4.81745	30.5771	33.0965	-2.51948
YCR002C	3	118905	35.9782	20.7157	118350	ARS308.3	-250	same	nd	lagging	TFIID-dominated	0.552573	-0.00780051	G2	28.7157	33.5022	-4.78646	33.6579	30.149	3.50897
YCR004C	3	121025	43.1259	21.6656	120480	ARS308.4	80	opposite	0	leading	TFIID-dominated	0.387445	-0.468885	rest	35.8655	35.9917	-0.126156	30.8592	33.9076	-3.04847
YCR005C	3	122897	40.2501	22.2916	122340	ARS308.5	140	opposite	ND	leading	SAGA-dominated	0.262956	0.0112384	rest	38.2971	39.9002	-1.60312	35.7543	37.9973	-2.24291
YCR006C	3	123500	39.2749	22.5972	122970	ARS308.5	770	opposite	ND	leading	SAGA/TFIID	ND	ND	ND	44.0402	48.5563	-4.5161	37.2122	37.9116	-0.699328
YCR008W	3	127509	35.8937	22.537	128070	ARS309.1	-3730	opposite	0	lagging	TFIID-dominated	ND	ND	ND	26.7955	27.3597	-0.564156	33.2199	29.0107	4.20918
YCR007C	3	128033	34.7879	22.5689	127500	ARS309.0	3700	opposite	0	leading	TFIID-dominated	-0.00812689	-0.463471	rest	30.5564	35.7497	-5.1933	30.2177	34.4221	-4.20437
YCR009C	3	132113	33.8133	23.6259	131580	ARS309.1	-220	same	0	lagging	TFIID-dominated	-0.119377	-0.158516	rest	24.4435	25.258	-0.814541	24.5107	28.8551	-4.34437
YCR010C	3	133737	34.4745	24.7399	133200	ARS309.2	-600	same	1	lagging	TFIID-dominated	-0.736794	-0.860464	rest	24.7109	27.5057	-2.7948	24.6398	25.3556	-0.715778
YCR012W	3	137173	41.691	26.8229	137760	ARS309.3	-840	opposite	0.5	lagging	SAGA-dominated	ND	ND	ND	35.7344	35.3477	0.386724	34.7081	27.4602	7.24781
YCR011C	3	137521	41.2777	26.7961	136980	ARS309.3	-1620	same	0.5	lagging	TFIID-dominated	-0.00855546	-0.229946	rest	30.9029	28.6626	2.24032	33.8346	30.6871	3.1475
YCR013C	3	139546	45.0881	26.5914	138990	ARS309.3	390	opposite	0.2	leading	SAGA-dominated	ND	ND	ND	36.6657	42.7579	-6.09223	28.4706	38.0703	-9.5997
YCR016W	3	143101	41.2202	24.0598	143670	ARS309.3	5070	same	0.2	leading	TFIID-dominated	ND	ND	ND	41.9603	43.1693	-1.20897	39.6711	45.9238	-6.25266
YCR015C	3	142705	41.016	25.0404	142170	ARS309.3	3570	opposite	0.2	leading	TFIID-dominated	0.527498	-0.157102	rest	39.2393	34.6361	4.60323	38.3231	35.816	2.50713
YCR017C	3	148177	75.2109	23.8557	147630	ARS309.3	9030	opposite	0.2	leading	ND	0.32995	0.416885	rest	41.5324	44.8007	-3.26828	42.4252	46.1134	-3.6882
YCR018C	3	149400	51.9497	24.6886	148860	ARS309.3	10260	opposite	0.2	leading	ND	ND	ND	ND	0	0		0	0
YCR019W	3	152197	42.5486	29.2139	152760	ARS310.0	-11040	opposite	0.818182	lagging	ND	-0.815794	-0.487691	rest	40.6638	38.6584	2.00547	37.6886	36.4644	1.22413
YCR018C-A	3	152359	42.5486	28.1696	151800	ARS310.0	-12000	same	0.818182	lagging	ND	ND	ND	ND	41.5617	41.2119	0.349751	43.0901	46.4289	-3.33874
YCR020C	3	155156	36.4973	30.63	154620	ARS310.0	-9180	same	0.818182	lagging	TFIID-dominated	-0.0855019	-0.236425	rest	35.0266	35.8979	-0.87125	34.9431	31.722	3.22105
YCR020W-B	3	154773	37.2065	30.8312	155340	ARS310.0	-8460	opposite	0.818182	lagging	ND	ND	ND	ND	36.6422	38.3825	-1.74029	34.1896	32.5683	1.62131
YCR020C-A	3	155593	35.9942	30.8312	155040	ARS310.0	-8760	same	0.818182	lagging	TFIID-dominated	-0.0126269	-1.19722	rest	32.8431	33.8218	-0.978662	34.1584	30.7713	3.38704
YCR021C	3	157713	37.4391	31.0919	157170	ARS310.0	-6630	same	0.818182	lagging	SAGA-dominated	-0.369349	-0.669154	rest	41.099	35.5571	5.54192	33.9749	32.542	1.43289
YCR022C	3	158260	38.2534	31.0411	157710	ARS310.0	-6090	same	0.818182	lagging	ND	ND	ND	ND	32.0678	31.6924	0.375379	32.6763	32.6683	0.00798952
YCR023C	3	160953	35.7166	30.0753	160410	ARS310.0	-3390	same	0.818182	lagging	TFIID-dominated	-0.102294	0.173484	rest	36.4897	37.2064	-0.716645	34.9837	31.345	3.63871
YCR024C	3	162753	33.9647	29.3289	162210	ARS310.0	-1590	same	0.818182	lagging	TFIID-dominated	0.41504	-0.208584	rest	27.5811	29.0892	-1.50809	27.6966	26.753	0.943597
YCR024C-B	3	163360	35.6068	29.0612	162810	ARS310.0	-990	same	0.818182	lagging	ND	ND	ND	ND	41.8363	37.4001	4.43621	27.6084	30.2768	-2.66843
YCR024C-A	3	163562	35.6068	28.7879	163020	ARS310.0	-780	same	0.818182	lagging	SAGA-dominated	1.34637	0.570468	M	40.4176	33.8346	6.58293	25.9231	27.7455	-1.82243
YCR026C	3	166834	50.1424	27.1266	166290	ARS310.0	2490	opposite	0	leading	TFIID-dominated	-0.502814	-0.0860922	rest	22.83	23.9167	-1.08669	22.3584	22.968	-0.609561
YCR027C	3	168681	R	26.1412	168150	ARS310.0	4350	opposite	0	leading	TFIID-dominated	-0.25346	-0.342635	rest	39.5967	35.9067	3.68993	28.8073	27.7458	1.06147
YCR028C	3	173041	53.3674	24.9445	172500	ARS310.0	8700	opposite	0	leading	TFIID-dominated	-0.157841	0.193921	rest	40.6713	43.5194	-2.84809	42.0915	47.116	-5.02448
YCR028C-A	3	174017	59.9808	24.8735	173460	ARS310.0	9660	opposite	0	leading	ND	0.431998	-0.116077	ND	42.9815	42.8621	0.119435	47.1991	51.6978	-4.49871
YCR030C	3	177009	64.6275	25.1777	176460	ARS313.0	-6940	same	0.666667	lagging	ND	-0.313227	0.136111	rest	43.6467	43.2119	0.434842	50.1018	44.4286	5.67321
YCR032W	3	178909	63.6108	26.0635	179490	ARS313.0	-3910	opposite	0.666667	lagging	TFIID-dominated	ND	ND	ND	46.6637	44.121	2.54269	52.0214	48.9667	3.0547
YCR031C	3	178753	64.0188	25.666	178200	ARS313.0	-5200	same	0.666667	lagging	TFIID-dominated	2.54887	1.66297	rest	44.7155	42.2545	2.46103	50.5475	44.8016	5.74588
YCR033W	3	185781	59.8833	26.5483	186360	ARS313.0	2960	same	1	leading	TFIID-dominated	-0.106027	0.781346	rest	43.0216	45.84	-2.81836	48.2483	52.8271	-4.57882
YCR034W	3	190045	52.5833	23.8037	190620	ARS313.1	420	same	1	leading	TFIID-dominated	1.02057	1.37901	rest	42.7228	41.5293	1.19344	44.8773	49.0602	-4.18283
YCR036W	3	192757	48.9865	21.5588	193320	ARS313.2	1120	same	ND	leading	TFIID-dominated	ND	ND	ND	39.2065	42.068	-2.86151	37.694	42.098	-4.40404
YCR035C	3	193545	49.1143	21.5588	192990	ARS313.2	790	opposite	ND	leading	TFIID-dominated	0.176456	0.538784	rest	42.7438	41.7318	1.012	44.0212	45.7257	-1.70452
YCR037C	3	197721	78.7722	17.8572	197190	ARS314.0	-1010	same	1	lagging	TFIID-dominated	0.0548731	0.126597	rest	42.815	42.2554	0.55963	48.8589	40.5115	8.34735
YCR038W-A	3	198788	R	16.9708	199350	ARS314.0	1150	same	0.75	leading	ND	ND	ND	ND	0	0		0	0
YCR040W	3	199937	R	17.0171	200520	ARS314.0	2320	same	0.75	leading	TFIID-dominated	ND	ND	ND	43.5148	47.568	-4.05316	49.2921	57.3535	-8.06145
YCR041W	3	200406	R	17.1711	200970	ARS314.0	2770	same	0.75	leading	TFIID-dominated	ND	ND	ND	42.6476	42.3359	0.311641	42.3736	53.9327	-11.5591
YCR039C	3	200673	R	17.0171	200130	ARS314.0	1930	opposite	0.75	leading	SAGA-dominated	ND	ND	ND	0	0		0	0
YCR042C	3	205913	44.0014	20.9215	205380	ARS314.5.0	-6020	same	0.714286	lagging	TFIID-dominated	0.137492	-0.0956669	M	42.6691	42.0935	0.575624	49.9281	40.9216	9.00648
YCR043C	3	207193	43.4001	22.1872	206640	ARS314.5.0	-4760	same	0.714286	lagging	TFIID-dominated	0.385373	0.385468	rest	43.7208	41.991	1.7298	47.2379	43.0543	4.18364
YCR044C	3	208473	41.8199	22.8318	207930	ARS314.5.0	-3470	same	0.714286	lagging	TFIID-dominated	ND	ND	ND	43.2107	41.1932	2.01749	49.5274	42.5963	6.93106
YCR045W-A	3	208246	42.0956	23.2776	208830	ARS314.5.0	-2570	opposite	0.714286	lagging	ND	ND	ND	ND	39.3795	38.5763	0.803259	40.8087	36.8299	3.97875
YCR045C	3	210105	41.098	23.4986	209550	ARS314.5.0	-1850	same	0.714286	lagging	TFIID-dominated	-0.242984	0.588251	rest	39.6667	38.393	1.27372	41.4644	36.9998	4.46458
YCR046C	3	210945	40.1719	23.5186	210390	ARS314.5.0	-1010	same	0.714286	lagging	TFIID-dominated	0.502706	0.691419	rest	38.8235	37.9172	0.906389	50.2336	37.9444	12.2892
YCR047W-A	3	210796	40.5895	23.3714	211380	ARS314.5.0	-20	opposite	0.714286	lagging	ND	ND	ND	ND	36.2501	37.0624	-0.812363	43.3732	38.9342	4.43904
YCR048W	3	211341	39.6671	23.2057	211920	ARS314.5.0	520	same	0.5	leading	TFIID-dominated	ND	ND	ND	38.1472	39.751	-1.60376	35.4136	41.5824	-6.16882
YCR047C	3	212145	37.2297	23.2057	211590	ARS314.5.0	190	opposite	0.5	leading	TFIID-dominated	-0.432727	0.683365	rest	36.8446	35.9651	0.879551	38.6471	45.7837	-7.13658
YCR049C	3	212812	33.8087	22.982	212280	ARS314.5.1	-320	same	1	lagging	TFIID-dominated	ND	ND	ND	37.7674	38.0633	-0.295831	41.2312	35.2217	6.0095
YCR051W	3	213549	33.0158	21.6224	214110	ARS314.5.3	-490	opposite	0	lagging	TFIID-dominated	0.0262481	0.434124	rest	40.676	39.12	1.55605	44.1815	33.0768	11.1046
YCR050C	3	214267	34.561	22.0173	213720	ARS314.5.2	320	opposite	0	leading	TFIID-dominated	ND	ND	ND	37.3066	40.8816	-3.575	38.804	40.585	-1.78098
YCR052W	3	214381	34.561	21.2048	214950	ARS314.5.3	350	same	nd	leading	TFIID-dominated	-0.412127	0.279231	rest	33.5093	36.9059	-3.39651	31.6556	34.7902	-3.13462
YCR053W	3	216133	39.6018	19.4729	216720	ARS314.5.3	2120	same	nd	leading	ND	ND	ND	ND	27.057	27.3083	-0.251242	27.3187	31.6557	-4.33696
YCR054C	3	220665	33.3872	16.9866	220110	ARS315.0	-2490	same	1	lagging	TFIID-dominated	0.112484	-0.24084	rest	28.9362	25.667	3.26918	27.0492	27.2551	-0.20596
YCR060W	3	223877	31.6253	15.3341	224460	ARS315.1	260	same	0.5	leading	TFIID-dominated	ND	ND	ND	20.9833	21.2593	-0.275961	21.2292	21.3558	-0.126554
YCR059C	3	224761	33.6385	15.3341	224220	ARS315.1	20	opposite	0.5	leading	TFIID-dominated	-0.0788769	-0.137924	rest	18.7411	19.7093	-0.968209	19.0859	19.542	-0.456121
YCR061W	3	225013	34.1441	15.0688	225600	ARS315.2	-1200	opposite	0	lagging	TFIID-dominated	-1.2612	-0.244445	rest	28.5938	25.3343	3.25944	26.194	24.0302	2.1638
YCR063W	3	227789	38.6996	14.905	228360	ARS315.3	-640	opposite	0	lagging	TFIID-dominated	1.013	0.782333	rest	25.5747	32.9269	-7.3522	26.8921	34.1456	-7.25348
YCR065W	3	228773	37.9343	15.2345	229350	ARS315.3	350	same	1	leading	TFIID-dominated	0.667811	1.53576	G1	27.0561	28.1029	-1.04677	28.0013	27.5823	0.418968
YCR064C	3	229000	37.6055	14.905	228450	ARS315.3	-550	same	0	lagging	TFIID-dominated	ND	ND	ND	23.6311	32.0226	-8.39143	26.2326	29.924	-3.69143
YCR066W	3	230949	37.3383	16.7258	231510	ARS315.3	2510	same	1	leading	TFIID-dominated	-0.12921	-0.268931	rest	28.5716	27.5548	1.01676	28.6439	31.477	-2.83303
YCR068W	3	236573	41.3494	24.7037	237150	ARS315.3	8150	same	1	leading	TFIID-dominated	ND	ND	ND	38.6796	42.2841	-3.60452	39.0111	46.0941	-7.08299
YCR067C	3	236929	41.341	23.4521	236370	ARS315.3	7370	opposite	1	leading	TFIID-dominated	-0.356994	-0.086068	rest	31.6449	35.0293	-3.38435	32.5613	35.0208	-2.45951
YCR069W	3	238389	42.0826	26.3338	238950	ARS315.3	9950	same	1	leading	ND	0.145373	0.52198	G2	41.3007	42.2773	-0.976595	40.4492	46.1697	-5.72053
YCR071C	3	241081	49.7195	28.1254	240540	ARS315.3	11540	opposite	1	leading	TFIID-dominated	ND	ND	ND	40.8212	39.7748	1.04632	39.7756	45.361	-5.58541
YCR072C	3	242881	53.7958	29.2448	242340	ARS316.0	-13060	same	0.555556	lagging	TFIID-dominated	ND	ND	ND	41.5423	42.8865	-1.34416	47.8025	41.6542	6.14828
YCR073W-A	3	246429	56.1562	31.2387	246990	ARS316.0	-8410	opposite	0.555556	lagging	ND	ND	ND	ND	44.7357	41.8523	2.88331	53.1818	47.9273	5.25445
YCR073C	3	247177	57.8518	31.2387	246630	ARS316.0	-8770	same	0.555556	lagging	TFIID-dominated	-0.48396	-0.695327	rest	41.6837	41.4913	0.192468	48.1975	44.8515	3.34606
YCR075W-A	3	248445	60.7968	31.5225	249030	ARS316.0	-6370	opposite	0.555556	lagging	ND	ND	ND	ND	44.5122	44.2829	0.229224	50.5751	46.1062	4.46887
YCR075C	3	249345	60.4989	31.5225	248790	ARS316.0	-6610	same	0.555556	lagging	TFIID-dominated	ND	ND	ND	45.9033	44.5162	1.38712	54.0633	47.9362	6.12706
YCR076C	3	250553	61.7949	31.5996	250020	ARS316.0	-5380	same	0.555556	lagging	TFIID-dominated	ND	ND	ND	43.7553	45.87	-2.1147	49.4404	46.5274	2.91302
YCR079W	3	252293	62.9923	31.9479	252870	ARS316.0	-2530	opposite	0.555556	lagging	TFIID-dominated	ND	ND	ND	46.6982	44.4412	2.25704	50.5574	51.8759	-1.31849
YCR077C	3	253169	64.2659	31.9479	252630	ARS316.0	-2770	same	0.555556	lagging	TFIID-dominated	0.235762	0.808184	rest	41.7891	43.6217	-1.83266	47.1337	54.5181	-7.38437
YCR081W	3	253821	65.0842	32.426	254400	ARS316.0	-1000	opposite	0.555556	lagging	TFIID-dominated	-0.370127	-0.20072	rest	45.8675	42.1916	3.6759	49.8646	46.4321	3.4325
YCR082W	3	258341	60.5092	35.3562	258930	ARS316.0	3530	same	0.666667	leading	TFIID-dominated	0.420206	0.253814	rest	40.4092	45.8911	-5.48198	48.1852	54.2529	-6.06768
YCR081C-A	3	259147	59.4484	35.3562	258600	ARS316.0	3200	opposite	0.666667	leading	ND	ND	ND	ND	39.1326	45.634	-6.50142	49.321	52.2288	-2.90782
YCR083W	3	259053	59.4484	35.7077	259620	ARS316.0	4220	same	0.666667	leading	TFIID-dominated	0.712873	0.114926	rest	43.8994	45.3246	-1.42522	49.3022	54.6715	-5.36935
YCR085W	3	262412	54.8498	37.3649	262980	ARS316.1	-4020	opposite	0.333333	lagging	TFIID-dominated	ND	ND	ND	43.4832	41.9537	1.52941	50.4736	44.7451	5.72854
YCR086W	3	262797	54.8498	37.4559	263370	ARS316.1	-3630	opposite	0.333333	lagging	TFIID-dominated	ND	ND	ND	43.1997	41.4377	1.76202	52.7174	44.1749	8.54255
YCR084C	3	263201	52.9261	37.3649	262650	ARS316.1	-4350	same	0.333333	lagging	TFIID-dominated	0.0747287	1.16153	rest	41.3647	43.9679	-2.60317	53.6623	54.4488	-0.786519
YCR087W	3	263472	52.9261	37.5082	264060	ARS316.1	-2940	opposite	0.333333	lagging	TFIID-dominated	ND	ND	ND	42.4153	39.44	2.97532	53.111	45.4549	7.65604
YCR088W	3	264525	50.9198	37.5001	265110	ARS316.1	-1890	opposite	0.333333	lagging	TFIID-dominated	ND	ND	ND	43.7904	39.879	3.91141	51.8383	46.2333	5.60508
YCR087C-A	3	264963	51.8736	37.5227	264420	ARS316.1	-2580	same	0.333333	lagging	ND	0.15604	0.194845	ND	42.3511	39.44	2.91114	53.111	45.4549	7.65604
YCR089W	3	266645	45.7394	36.8838	267210	ARS316.1	210	same	1	leading	SAGA-dominated	-1.00854	-0.342528	rest	37.2747	41.1436	-3.86893	41.2352	39.9876	1.24758
YCR091W	3	273853	46.547	33.6211	274440	ARS316.5	-960	opposite	0	lagging	SAGA-dominated	ND	ND	ND	41.7564	39.4854	2.27099	44.8434	40.7294	4.11395
YCR090C	3	273401	45.6412	34.1075	272850	ARS316.4	-550	same	ND	lagging	TFIID-dominated	0.197623	-1.71752	rest	35.2039	36.7303	-1.52634	39.4848	37.0881	2.3967
YCR093W	3	279541	55.8282	34.0153	280110	ARS316.5	4710	same	nd	leading	TFIID-dominated	ND	ND	ND	43.8368	45.8344	-1.99752	47.4941	50.5001	-3.00598
YCR092C	3	280345	57.4001	34.0153	279810	ARS316.5	4410	opposite	nd	leading	TFIID-dominated	-0.271581	0.0691096	rest	39.0096	42.4702	-3.46059	40.4577	46.0873	-5.62962
YCR094W	3	286205	68.8991	37.3343	286770	ARS317.0	-5854	opposite	ND	lagging	TFIID-dominated	0.322623	0.188283	rest	46.5169	43.4257	3.09115	52.8707	46.3329	6.5378
YCR095W-A	3	288997	86.8064	40.8754	289560	ARS317.0	-3064	opposite	ND	lagging	ND	ND	ND	ND	42.3397	42.3911	-0.0514868	46.2744	44.342	1.93241
YCR095C	3	289801	93.8645	40.8754	289260	ARS317.0	-3364	same	ND	lagging	TFIID-dominated	-0.0631983	-0.475637	rest	45.5778	42.2716	3.30618	51.9549	47.5358	4.41915
YCR097W	3	293331	72.7872	48.185	293910	ARS318.0	-690	opposite	ND	lagging	ND	ND	ND	ND	42.5448	44.3012	-1.75639	48.3241	44.9095	3.41465
YCR096C	3	294034	69.7613	47.8341	293490	ARS317.0	866	opposite	ND	leading	SAGA-dominated	ND	-1.29458	rest	42.903	43.4747	-0.571736	44.6976	50.263	-5.56542
YCR097W-A	3	293935	70.9617	48.3516	294510	ARS318.0	-90	opposite	ND	lagging	TFIID-dominated	ND	ND	ND	45.0833	45.1031	-0.019825	49.4991	44.8401	4.65893
YCR098C	3	299297	64.2576	44.3081	298740	ARS318.0	4140	opposite	ND	leading	ND	-0.890127	-0.498168	rest	47.1028	48.0524	-0.949596	55.578	50.6726	4.90544
YCR099C	3	301795	67.5203	41.6608	301260	ARS318.1	-4140	same	1	lagging	SAGA-dominated	-0.689752	-0.339273	rest	43.6998	43.6638	0.0359984	54.1776	49.432	4.74566
YCR100C	3	302717	72.5895	40.9696	302160	ARS318.1	-3240	same	1	lagging	SAGA-dominated	-0.391377	-0.355436	rest	43.9542	43.1817	0.772433	51.1536	47.6129	3.54076
YCR101C	3	303526	83.3596	40.7114	302970	ARS318.1	-2430	same	1	lagging	SAGA-dominated	-0.653877	-0.455915	rest	43.8465	42.5372	1.30928	52.1114	47.7277	4.38368
YCR102W-A	3	306231	R	40.6391	306810	ARS319.0	610	same	ND	leading	ND	ND	ND	ND	48.2495	46.6382	1.6113	50.5737	50.6373	-0.063639
YCR102C	3	305963	59.1393	40.2966	305430	ARS318.1	30	opposite	nd	leading	TFIID-dominated	-1.11196	-0.601655	rest	49.7863	51.0391	-1.25279	0	0
YCR104W	3	307297	53.9952	40.982	307860	ARS319.0	1660	same	ND	leading	TFIID-dominated	ND	ND	ND	42.172	41.9328	0.239238	46.2128	47.6261	-1.41332
YDL248W	4	1301	R	46.4747	1890	ARS400.0	1653	same	ND	leading	TFIID-dominated	-0.803627	-0.229583	rest	0	0		0	0
YDL247W-A	4	3261	0	48.8161	3840	ARS400.0	3603	same	ND	leading	ND	ND	ND	ND	0	0		0	0
YDL247W	4	5484	0	50.2584	6060	ARS400.0	5823	same	ND	leading	TFIID-dominated	ND	ND	ND	0	0		0	0
YDL246C	4	10255	0	50.3717	9720	ARS403.0	-5872	same	ND	lagging	SAGA/TFIID	ND	ND	ND	0	0		0	0
YDL245C	4	13859	R	48.3498	13320	ARS403.0	-2272	same	ND	lagging	SAGA/TFIID	ND	ND	ND	0	0		0	0
YDL244W	4	15703	66.0047	46.736	16290	ARS403.0	698	same	ND	leading	TFIID-dominated	ND	ND	ND	48.0174	49.3616	-1.34426	54.1509	55.1733	-1.02239
YDL242W	4	18458	54.0863	44.8731	19020	ARS402.5.0	-1580	opposite	0.333333	lagging	ND	ND	ND	ND	39.3626	38.5384	0.824222	41.3436	42.0215	-0.677944
YDL243C	4	19065	53.341	45.1985	18510	ARS402.5.0	-2090	same	0.333333	lagging	TFIID-dominated	-0.419627	-0.454791	rest	43.9675	47.1502	-3.18272	49.3191	51.8502	-2.53108
YDL241W	4	19692	55.2503	44.187	20280	ARS402.5.0	-320	opposite	0.333333	lagging	TFIID-dominated	ND	ND	ND	44.7583	41.4634	3.29487	45.1956	45.1285	0.067137
YDL240W	4	22140	62.2713	42.304	22710	ARS402.5.0	2110	same	0.5	leading	TFIID-dominated	0.0431803	0.34499	rest	43.4221	47.1239	-3.7018	46.4306	46.5139	-0.083297
YDL240C-A	4	23107	65.4661	42.304	22560	ARS402.5.0	1960	opposite	0.5	leading	ND	ND	ND	ND	41.0624	40.838	0.224463	42.6121	40.932	1.6801
YDL237W	4	30124	54.8776	39.3908	30690	ARS404.0	-6710	opposite	0.5	lagging	TFIID-dominated	ND	ND	ND	44.2908	43.1777	1.11307	49.2091	51.1241	-1.915
YDL238C	4	30984	55.1951	39.3908	30450	ARS404.0	-6950	same	0.5	lagging	SAGA-dominated	-0.88227	-0.422072	rest	43.5754	42.38	1.19541	45.6965	48.945	-3.24844
YDL236W	4	31748	52.5963	39.3392	32310	ARS404.0	-5090	opposite	0.5	lagging	TFIID-dominated	0.178498	0.41144	rest	43.8755	40.8928	2.98271	46.6524	44.8381	1.81424
YDL235C	4	34536	43.4837	39.0849	33990	ARS404.0	-3410	same	0.5	lagging	TFIID-dominated	1.09987	0.386946	rest	43.565	39.8564	3.70856	46.3766	42.2677	4.10899
YDL233W	4	36276	45.2599	38.2096	36840	ARS404.0	-560	opposite	0.5	lagging	TFIID-dominated	ND	ND	ND	38.9456	39.2265	-0.280888	47.3663	42.9664	4.39988
YDL234C	4	37096	44.3016	38.3896	36540	ARS404.0	-860	same	0.5	lagging	SAGA-dominated	-0.527627	-0.0736099	rest	41.5372	39.9253	1.61197	47.1345	43.2364	3.89803
YDL232W	4	37964	44.4294	37.6348	38550	ARS404.0	1150	same	1	leading	TFIID-dominated	0.708873	0.923245	rest	37.5035	38.9041	-1.40053	34.6658	40.1054	-5.43964
YDL230W	4	42156	57.7456	36.5421	42720	ARS404.1	520	same	0.5	leading	TFIID-dominated	ND	ND	ND	34.9537	39.5734	-4.61972	33.4386	38.9433	-5.50469
YDL231C	4	42864	47.237	36.5421	42330	ARS404.1	130	opposite	0.5	leading	TFIID-dominated	-0.0153602	0.43509	rest	37.0343	36.9823	0.0520295	38.115	40.2721	-2.15709
YDL229W	4	43540	42.1622	36.521	44130	ARS404.2	130	same	1	leading	ND	ND	ND	ND	31.2392	36.78	-5.54075	35.2771	37.4535	-2.17636
YDL228C	4	46418	40.5612	36.8389	45870	ARS404.3	-1130	same	1	lagging	TFIID-dominated	ND	ND	ND	36.5801	31.0295	5.55066	37.4659	34.9496	2.51635
YDL227C	4	48531	43.6742	37.448	48000	ARS404.4	400	opposite	0	leading	ND	-0.740396	-0.986134	G1	36.5088	35.7481	0.760704	36.8703	39.6366	-2.76638
YDL225W	4	51892	47.8051	39.0106	52470	ARS404.6	670	same	0.333333	leading	TFIID-dominated	ND	ND	ND	40.5754	40.2962	0.279259	44.6595	43.0394	1.62009
YDL226C	4	52696	49.7227	38.8627	52140	ARS404.6	340	opposite	0.333333	leading	TFIID-dominated	0.319706	0.334249	rest	42.5047	41.3878	1.11687	48.1104	40.8503	7.26014
YDL224C	4	57224	50.4257	39.9266	56670	ARS404.6	4870	opposite	0.333333	leading	TFIID-dominated	0.460773	0.775932	rest	42.2175	38.2752	3.9423	42.4536	41.6678	0.785709
YDL223C	4	60968	58.5287	40.7227	60420	ARS404.7	-3380	same	0.666667	lagging	SAGA-dominated	-1.06	-0.646695	rest	41.3598	41.081	0.278814	48.1807	47.5823	0.598387
YDL221W	4	61511	59.2311	41.0196	62100	ARS404.7	-1700	opposite	0.666667	lagging	TFIID-dominated	ND	ND	ND	43.2595	45.9356	-2.67612	52.8071	56.3127	-3.50563
YDL222C	4	62392	60.1473	41.0196	61860	ARS404.7	-1940	same	0.666667	lagging	SAGA-dominated	-0.638627	-0.427006	rest	44.6143	44.0716	0.542723	50.1778	56.2611	-6.08331
YDL219W	4	64700	60.547	41.5075	65280	ARS404.7	1480	same	0.5	leading	TFIID-dominated	ND	ND	ND	43.4345	43.2396	0.194901	47.6494	45.4244	2.22505
YDL220C	4	65544	63.2528	41.5075	65010	ARS404.7	1210	opposite	0.5	leading	TFIID-dominated	-0.690672	-0.0805453	rest	43.2983	44.1477	-0.849363	51.8856	52.7568	-0.87127
YDL218W	4	65993	63.2266	41.6361	66570	ARS404.7	2770	same	0.5	leading	TFIID-dominated	-0.686927	0.100975	rest	44.3901	43.2267	1.16335	50.7558	50.6163	0.139469
YDL217C	4	69272	60.9256	41.55	68730	ARS404.7	4930	opposite	0.5	leading	TFIID-dominated	0.144373	0.657085	rest	44.7281	44.4627	0.265453	51.1868	49.4945	1.69229
YDL216C	4	70832	54.347	41.2448	70290	ARS405.0	-4310	same	1	lagging	TFIID-dominated	-0.244044	-0.145729	rest	45.9575	45.1995	0.758034	50.8147	51.1949	-0.380158
YDL215C	4	74608	52.7077	39.7942	74070	ARS405.0	-530	same	1	lagging	ND	0.115266	0.294128	rest	44.052	43.1146	0.937436	46.7766	47.892	-1.11541
YDL214C	4	77112	46.7122	38.5642	76560	ARS405.0	1960	opposite	0.333333	leading	TFIID-dominated	-0.923677	-0.901443	rest	41.1672	41.2287	-0.0615046	44.6261	47.1312	-2.50509
YDL212W	4	77860	45.6498	37.6717	78450	ARS405.0	3850	same	0.333333	leading	TFIID-dominated	ND	ND	ND	41.7648	42.6223	-0.857504	44.9953	44.0521	0.943269
YDL213C	4	78744	44.002	37.6717	78210	ARS405.0	3610	opposite	0.333333	leading	TFIID-dominated	-0.0835019	0.157299	rest	40.7696	39.7015	1.06806	40.679	43.8161	-3.13709
YDL211C	4	80984	38.1267	36.7873	80430	ARS405.1	-3770	same	1	lagging	TFIID-dominated	-0.390081	0.403865	G1	40.7687	40.8988	-0.130112	42.0165	39.8204	2.19614
YDL210W	4	84036	35.3462	35.006	84600	ARS405.1	400	same	1	leading	SAGA-dominated	-0.975502	-0.780968	rest	35.4672	35.9508	-0.48359	34.8082	41.4098	-6.60162
YDL208W	4	86964	45.0315	34.2772	87540	ARS405.3	140	same	1	leading	TFIID-dominated	ND	ND	ND	40.4862	39.2679	1.21824	43.2584	41.4704	1.78801
YDL209C	4	87760	45.7603	34.3437	87210	ARS405.3	-190	same	nd	lagging	TFIID-dominated	-0.249327	0.0855166	rest	39.1681	40.1061	-0.937989	42.2906	41.1741	1.11647
YDL207W	4	87716	45.7603	34.231	88290	ARS405.3	890	same	1	leading	TFIID-dominated	0.164087	0.264151	rest	40.4052	36.8619	3.54334	44.1533	40.0422	4.11114
YDL206W	4	89524	49.9297	34.2167	90090	ARS405.4	690	same	1	leading	TFIID-dominated	-0.322777	-0.790728	rest	38.275	38.4696	-0.194599	39.0245	40.0292	-1.00469
YDL204W	4	94108	51.625	34.737	94680	ARS405.5.0	-3120	opposite	0	lagging	SAGA-dominated	ND	ND	ND	43.5303	42.162	1.36832	45.6711	44.6315	1.03962
YDL205C	4	94496	52.0928	34.6702	93960	ARS405.5	2560	opposite	ND	leading	TFIID-dominated	0.516623	0.290796	rest	41.0761	42.5464	-1.47028	44.9072	45.3686	-0.461329
YDL202W	4	97924	52.7723	35.0819	98490	ARS405.5.0	690	same	nd	leading	TFIID-dominated	ND	ND	ND	43.4299	43.416	0.0139026	48.2755	46.6461	1.62939
YDL203C	4	98656	51.4439	35.0553	98100	ARS405.5.0	300	opposite	nd	leading	TFIID-dominated	-0.218238	-0.0247171	rest	40.7782	41.9777	-1.19948	46.7607	44.3782	2.38246
YDL201W	4	98996	50.7867	35.129	99570	ARS405.5.1	-1430	opposite	ND	lagging	TFIID-dominated	-0.148127	0.259451	rest	44.3195	45.1739	-0.854397	48.5312	52.945	-4.41372
YDL199C	4	103936	47.9095	35.2286	103380	ARS405.5.1	2380	opposite	ND	leading	TFIID-dominated	-0.881064	-0.430174	rest	43.3586	43.1852	0.173383	50.7963	48.5219	2.27441
YDL198C	4	105160	48.4407	35.2211	104610	ARS405.5.1	3610	opposite	ND	leading	SAGA-dominated	0.142273	0.844958	rest	42.3076	40.6899	1.6177	55.7714	51.5001	4.27131
YDL196W	4	106241	45.0769	35.1878	106830	ARS405.5.2	-3770	opposite	0.333333	lagging	ND	ND	ND	ND	44.1303	41.8247	2.30566	47.422	43.1496	4.27234
YDL195W	4	106588	43.0599	35.1769	107160	ARS405.5.2	-3440	opposite	0.333333	lagging	TFIID-dominated	ND	ND	ND	41.8879	41.0316	0.856337	45.0534	44.6758	0.377659
YDL197C	4	107368	40.6724	35.1769	106830	ARS405.5.2	-3770	same	0.333333	lagging	TFIID-dominated	-0.457752	0.177497	G1	42.1396	42.5423	-0.402771	52.643	47.9657	4.67725
YDL194W	4	110868	37.2236	34.7236	111450	ARS405.5.3	-750	opposite	0	lagging	TFIID-dominated	-0.922281	-0.400152	rest	37.9378	36.6784	1.25946	39.5921	42.6544	-3.06236
YDL193W	4	114068	44.2017	33.6251	114630	ARS405.5.3	2430	same	1	leading	TFIID-dominated	0.46073	0.0566092	rest	35.248	34.7518	0.496225	31.5317	36.0469	-4.51525
YDL192W	4	115764	43.3425	32.5056	116340	ARS406.0	-1460	opposite	0	lagging	TFIID-dominated	1.70112	1.36914	rest	32.5744	34.0398	-1.46545	33.2266	31.6501	1.57657
YDL191W	4	117116	37.5482	31.8838	117690	ARS406.0	-110	opposite	0	lagging	TFIID-dominated	2.26812	1.38311	rest	34.7808	33.2166	1.56424	35.4295	29.9256	5.50382
YDL189W	4	121468	37.419	29.666	122040	ARS406.1	-1360	opposite	0.5	lagging	TFIID-dominated	ND	ND	ND	30.2288	36.5204	-6.2916	28.033	29.8529	-1.81984
YDL190C	4	122296	38.3919	29.666	121740	ARS406.1	-1660	same	0.5	lagging	TFIID-dominated	0.0471367	-0.177082	rest	33.533	30.3987	3.13433	32.6903	30.1891	2.50121
YDL186W	4	125116	35.8351	29.5835	125700	ARS406.3	-500	opposite	0	lagging	TFIID-dominated	ND	ND	ND	34.6142	29.7219	4.89225	38.611	34.9398	3.67126
YDL188C	4	125680	37.4232	29.498	125130	ARS406.2	530	opposite	0	leading	TFIID-dominated	0.0299981	-0.0851359	rest	34.7154	34.9267	-0.211305	30.5369	31.656	-1.11918
YDL187C	4	126338	38.7753	29.6983	125790	ARS406.3	-410	same	0	lagging	TFIID-dominated	ND	ND	ND	35.0373	29.9901	5.04718	40.4573	42.4265	-1.96918
YDL185W	4	126180	38.7753	29.8405	126750	ARS406.3	550	same	nd	leading	TFIID-dominated	0.602055	0.714424	rest	35.501	36.9821	-1.48108	33.9703	37.9586	-3.98824
YDL185C-A	4	127335	42.0194	30.0079	126780	ARS406.3	580	opposite	nd	leading	ND	ND	ND	ND	29.0525	28.2615	0.790941	34.1791	34.4869	-0.307804
YDL184C	4	131048	49.7262	31.6426	130500	ARS406.4	1500	opposite	0	leading	TFIID-dominated	1.75912	1.79544	rest	38.0779	37.0684	1.00947	32.6819	43.7652	-11.0833
YDL182W	4	132908	41.7635	33.1845	133470	ARS407.0	870	same	1	leading	SAGA-dominated	ND	ND	ND	41.0883	43.2316	-2.14329	42.6141	43.6567	-1.04267
YDL183C	4	132400	45.3911	32.4272	131850	ARS407.0	-750	same	nd	lagging	TFIID-dominated	-0.310002	-0.749813	rest	38.5145	37.9381	0.576378	41.3142	34.46	6.85428
YDL181W	4	134508	45.0312	33.9111	135090	ARS407.1	90	same	0.833333	leading	TFIID-dominated	0.531873	0.367274	rest	35.6211	44.7575	-9.13643	39.6492	41.8926	-2.2434
YDL180W	4	135228	46.469	34.1501	135810	ARS407.1	810	same	0.833333	leading	TFIID-dominated	-0.118627	-0.0860912	M	41.7203	40.8388	0.881483	40.783	40.6713	0.111667
YDL179W	4	137604	45.09	35.3764	138180	ARS407.1	3180	same	0.833333	leading	TFIID-dominated	0.693373	-0.357853	M/G1	39.9412	42.1128	-2.17161	43.8905	43.1309	0.759608
YDL178W	4	138988	46.25	36.1906	139560	ARS407.1	4560	same	0.833333	leading	TFIID-dominated	0.315445	0.127378	rest	44.4076	43.1142	1.29345	43.9244	43.1181	0.806265
YDL176W	4	141452	52.939	37.8005	142020	ARS407.1	7020	same	0.833333	leading	TFIID-dominated	ND	ND	ND	44.3694	42.5018	1.86759	49.2996	48.7835	0.516063
YDL177C	4	142296	53.233	37.8005	141750	ARS407.1	6750	opposite	0.833333	leading	TFIID-dominated	-0.107377	-0.547746	rest	44.1401	43.1465	0.993671	45.1671	47.9794	-2.81229
YDL175C	4	146048	58.1558	40.4909	145500	ARS408.0	-4700	same	0.666667	lagging	TFIID-dominated	0.244973	0.231074	rest	44.8698	44.4519	0.417909	51.9285	49.917	2.01152
YDL173W	4	147652	56.5916	42.3428	148230	ARS408.0	-1970	opposite	0.666667	lagging	TFIID-dominated	ND	ND	ND	45.479	48.366	-2.88693	51.4132	44.3097	7.10347
YDL174C	4	148128	55.9577	41.9856	147570	ARS408.0	-2630	same	0.666667	lagging	SAGA-dominated	-0.252877	0.746836	rest	42.843	45.6656	-2.82257	53.858	52.2777	1.58028
YDL170W	4	155812	60.3063	48.3118	156390	ARS408.2	-610	opposite	0.5	lagging	TFIID-dominated	ND	ND	ND	47.5142	45.9552	1.55897	52.5662	56.5844	-4.01823
YDL171C	4	156432	59.5001	48.0832	155880	ARS408.2	-1120	same	0.5	lagging	TFIID-dominated	0.0420035	0.422456	rest	44.1578	45.14	-0.982172	52.5174	50.9551	1.56224
YDL168W	4	159036	63.3657	48.693	159600	ARS408.3	800	same	1	leading	TFIID-dominated	ND	ND	ND	45.0844	46.3112	-1.2268	53.2438	50.3463	2.89749
YDL169C	4	159248	63.8915	48.7573	158700	ARS408.3	-100	same	nd	lagging	SAGA-dominated	-0.960227	-0.953587	M/G1	46.2834	47.2538	-0.970454	50.4393	58.0058	-7.56648
YDL167C	4	163712	70.0725	47.5013	163170	ARS408.4	1770	opposite	0.333333	leading	TFIID-dominated	0.728998	0.803008	rest	47.2257	47.3697	-0.143985	57.3003	51.8079	5.49238
YDL165W	4	163740	70.0725	47.1063	164310	ARS408.4	2910	same	0.333333	leading	TFIID-dominated	ND	ND	ND	47.1014	43.4961	3.60539	52.1431	52.1488	-0.0057018
YDL166C	4	164608	70.2259	47.1063	164070	ARS408.4	2670	opposite	0.333333	leading	TFIID-dominated	ND	ND	ND	47.8119	44.7297	3.08217	52.7315	53.5672	-0.835658
YDL163W	4	166456	76.9589	46.5005	167040	ARS408.5	-1160	opposite	0.5	lagging	TFIID-dominated	ND	ND	ND	47.9314	47.5802	0.351241	64.3003	66.6733	-2.37298
YDL161W	4	167196	79.6078	46.5172	167760	ARS408.5	-440	opposite	0.5	lagging	TFIID-dominated	ND	ND	ND	43.6638	46.3551	-2.6913	53.1111	55.4981	-2.38702
YDL164C	4	167800	81.1251	46.5172	167250	ARS408.5	-950	same	0.5	lagging	TFIID-dominated	-0.301763	0.424557	G1	47.7569	49.3958	-1.63884	50.7463	53.5735	-2.82723
YDL162C	4	168215	79.7172	46.5172	167670	ARS408.5	-530	same	0.5	lagging	ND	ND	ND	ND	47.0893	48.1933	-1.10393	60.3508	63.136	-2.78519
YDL160C-A	4	170136	74.692	46.919	169590	ARS408.5	1390	opposite	0	leading	ND	0.814273	0.461467	ND	42.4234	43.6372	-1.21376	55.2021	49.4392	5.76284
YDL159W-A	4	171682	80.4045	47.8654	172260	ARS408.6	-1940	opposite	ND	lagging	ND	ND	ND	ND	54.325	48.6139	5.71109	51.046	53.1145	-2.06852
YDL159W	4	171932	80.4045	48.0502	172500	ARS408.6	-1700	opposite	ND	lagging	TFIID-dominated	ND	ND	ND	51.5576	50.0532	1.50436	55.2786	54.3818	0.896853
YDL160C	4	172712	77.689	47.8654	172170	ARS408.6	-2030	same	ND	lagging	TFIID-dominated	ND	ND	ND	49.0892	47.9026	1.18658	56.1237	55.0015	1.12219
YDL159C-B	4	173732	72.4172	48.2162	173190	ARS408.6	-1010	same	ND	lagging	ND	ND	ND	ND	52.8445	50.6866	2.15785	54.4796	53.2813	1.19832
YDL156W	4	174324	72.5487	48.5632	174900	ARS408.6	700	same	ND	leading	TFIID-dominated	ND	ND	ND	47.4918	48.9894	-1.49753	58.1092	56.0958	2.0134
YDL158C	4	174674	73.3226	48.4642	174120	ARS408.6	-80	same	ND	lagging	TFIID-dominated	ND	ND	ND	47.8389	46.3371	1.50179	52.1229	54.5924	-2.46945
YDL157C	4	175088	74.355	48.5346	174540	ARS408.6	340	opposite	ND	leading	TFIID-dominated	0.214623	0.132882	G1	47.8922	49.0657	-1.1735	56.1543	54.2315	1.92273
YDL155W	4	176132	77.2187	48.3789	176700	ARS408.6	2500	same	ND	leading	TFIID-dominated	ND	ND	ND	49.6837	52.7438	-3.06014	54.1732	53.1482	1.02504
YDL154W	4	179508	74.7972	46.6392	180090	ARS408.7	-4110	opposite	0.4	lagging	TFIID-dominated	-0.384669	-0.273552	rest	47.264	52.0262	-4.76214	59.6488	55.6419	4.00698
YDL152W	4	182322	74.6762	44.7971	182910	ARS408.7	-1290	opposite	0.4	lagging	TFIID-dominated	ND	ND	ND	49.8396	45.2577	4.58189	60.2215	66.3788	-6.15734
YDL150W	4	182732	74.3046	44.7971	183300	ARS408.7	-900	opposite	0.4	lagging	TFIID-dominated	ND	ND	ND	46.8471	50.6356	-3.78856	56.2881	58.1345	-1.84637
YDL153C	4	183560	71.7665	44.7971	183030	ARS408.7	-1170	same	0.4	lagging	TFIID-dominated	-0.0564047	0.278828	rest	46.4584	51.0497	-4.59127	64.1458	64.4676	-0.321858
YDL151C	4	184399	68.9443	44.3123	183840	ARS408.7	-360	same	0.4	lagging	TFIID-dominated	ND	ND	ND	49.272	52.1187	-2.84669	56.2732	59.9737	-3.70054
YDL149W	4	184396	68.9443	43.9227	184980	ARS408.7	780	same	0.75	leading	TFIID-dominated	-0.659627	-0.510932	rest	47.5998	46.2138	1.38601	53.1477	54.3758	-1.22806
YDL147W	4	190372	64.3867	43.0663	190950	ARS408.7	6750	same	0.75	leading	TFIID-dominated	ND	ND	ND	45.0773	45.1817	-0.104404	50.6829	49.7826	0.900332
YDL148C	4	191136	58.2991	43.1023	190590	ARS408.7	6390	opposite	0.75	leading	TFIID-dominated	-0.0614602	0.372336	rest	45.8226	46.8421	-1.01948	55.1353	57.7779	-2.6426
YDL146W	4	192068	52.9689	42.9028	192630	ARS408.7	8430	same	0.75	leading	TFIID-dominated	0.17423	-0.169517	rest	43.2347	44.4256	-1.19087	45.4619	48.8046	-3.34269
YDL145C	4	198960	40.4716	40.5172	198420	ARS409.0	-4180	same	0.666667	lagging	TFIID-dominated	0.218579	0.939304	rest	43.4611	40.6609	2.80015	45.4769	43.2032	2.27369
YDL143W	4	199460	39.4769	39.5495	200040	ARS409.0	-2560	opposite	0.666667	lagging	TFIID-dominated	ND	ND	ND	36.8903	39.5401	-2.64988	41.7221	37.3112	4.41084
YDL144C	4	200280	37.8103	39.8759	199740	ARS409.0	-2860	same	0.666667	lagging	TFIID-dominated	-0.0805269	0.434786	rest	41.8065	42.3457	-0.539155	46.0362	45.0032	1.03308
YDL141W	4	202308	34.9224	37.7198	202890	ARS409.0	290	same	0.5	leading	TFIID-dominated	ND	ND	ND	35.4442	37.9977	-2.55354	35.5279	43.7389	-8.21104
YDL142C	4	203160	34.7652	37.9959	202620	ARS409.0	20	opposite	0.5	leading	TFIID-dominated	0.14654	-0.457923	rest	39.2694	36.8299	2.43954	37.8913	40.6769	-2.78559
YDL140C	4	211664	31.9986	36.0517	211110	ARS409.5	-690	same	1	lagging	TFIID-dominated	0.634948	0.964393	rest	33.8836	29.939	3.9446	36.0855	31.3669	4.71864
YDL138W	4	212564	32.3277	36.2738	213150	ARS409.7	-650	opposite	0	lagging	TFIID-dominated	ND	ND	ND	35.9451	35.1703	0.774803	37.043	34.5288	2.51417
YDL139C	4	212592	32.3277	36.1571	212040	ARS409.5	240	opposite	nd	leading	TFIID-dominated	-0.610127	-1.02549	rest	29.7777	30.4384	-0.660675	26.0502	27.8739	-1.82372
YDL137W	4	215508	47.7169	36.5049	216090	ARS409.9	-110	opposite	0	lagging	TFIID-dominated	1.53437	0.78275	rest	38.7601	39.8518	-1.09166	39.7423	33.8801	5.86223
YDL136W	4	217028	44.8997	36.5149	217590	ARS409.9	1390	same	0.4	leading	TFIID-dominated	1.70104	0.908507	rest	36.0667	36.8031	-0.736377	31.8329	40.805	-8.97211
YDL135C	4	219864	42.8301	36.482	219330	ARS409.9	3130	opposite	0.4	leading	TFIID-dominated	0.887706	0.136813	rest	35.0533	37.9357	-2.88242	34.0113	40.5713	-6.55991
YDL134C	4	221800	43.4975	36.4942	221250	ARS409.9	5050	opposite	0.4	leading	TFIID-dominated	1.44137	0.495625	rest	38.54	38.0686	0.471398	35.4166	37.028	-1.61139
YDL133W	4	221780	43.4975	36.5118	222360	ARS409.9	6160	same	0.4	leading	TFIID-dominated	ND	ND	ND	36.5679	39.1053	-2.53742	36.8237	40.5446	-3.72084
YDL133C-A	4	222400	42.9052	36.5118	221850	ARS409.9	5650	opposite	0.4	leading	ND	2.01437	1.07092	ND	38.0593	39.115	-1.05578	37.7534	40.1836	-2.43018
YDL132W	4	223500	43.8823	36.6443	224070	ARS409.3.0	-6530	opposite	0	lagging	TFIID-dominated	-0.00789612	0.111294	rest	41.0326	41.0586	-0.0260014	42.5953	39.8479	2.74739
YDL131W	4	226812	46.996	37.0506	227400	ARS409.3.0	-3200	opposite	0	lagging	SAGA-dominated	0.580373	0.947352	rest	43.765	44.6856	-0.920664	44.6095	45.7198	-1.11028
YDL130W-A	4	228612	49.5108	37.1699	229200	ARS409.3.0	-1400	opposite	0	lagging	ND	0.678498	-0.292665	ND	41.8559	43.6808	-1.82497	45.8334	45.7793	0.0540577
YDL130W	4	229308	49.5158	37.1569	229890	ARS409.3.0	-710	opposite	0	lagging	TFIID-dominated	2.05987	1.38188	rest	40.8369	42.0098	-1.17286	44.8196	43.4604	1.35925
YDL129W	4	230396	46.8808	37.0329	230970	ARS409.3.0	370	same	1	leading	TFIID-dominated	0.614123	0.125523	rest	43.2291	41.9259	1.30321	41.8639	43.9209	-2.05701
YDL128W	4	232068	43.6846	36.6059	232650	ARS409.3.1	-750	opposite	0	lagging	TFIID-dominated	0.65023	0.143491	M	40.3122	40.3733	-0.0610255	43.2799	42.867	0.412866
YDL127W	4	234364	45.6041	35.3678	234930	ARS409.3.1	1530	same	1	leading	TFIID-dominated	0.228373	0.533514	G1	39.3408	42.1387	-2.79793	42.6068	44.8697	-2.26295
YDL126C	4	239240	53.2585	33.599	238710	ARS409.5.1	-690	same	ND	lagging	TFIID-dominated	0.39954	0.736651	rest	42.2354	42.4087	-0.173277	45.2288	44.2625	0.966297
YDL124W	4	239676	52.7724	33.2489	240240	ARS409.5.1	840	same	ND	leading	SAGA-dominated	ND	ND	ND	42.993	43.2771	-0.284091	42.8187	46.3031	-3.48443
YDL125C	4	240312	51.9905	33.2489	239760	ARS409.5.1	360	opposite	ND	leading	TFIID-dominated	0.703123	0.820308	rest	42.3889	42.9249	-0.535939	43.7194	45.2498	-1.53042
YDL123W	4	240884	50.4124	33.2983	241470	ARS409.5.2	-730	opposite	0	lagging	TFIID-dominated	0.598748	0.48185	rest	43.0357	40.9207	2.11496	44.0188	42.9598	1.05897
YDL122W	4	241740	49.3788	33.4088	242310	ARS409.5.2	110	same	1	leading	TFIID-dominated	0.415595	0.560483	rest	41.8154	43.1976	-1.38217	48.3103	47.9383	0.371999
YDL120W	4	245340	45.1321	35.506	245910	ARS409.5.3	510	same	0.5	leading	TFIID-dominated	ND	ND	ND	39.8501	45.4573	-5.60724	41.3802	44.2035	-2.82329
YDL121C	4	246120	45.641	35.1805	245580	ARS409.5.3	180	opposite	0.5	leading	TFIID-dominated	0.273706	0.237585	rest	39.4279	43.5334	-4.1055	41.0577	42.478	-1.42025
YDL118W	4	246801	44.5996	36.4494	247380	ARS410.0	380	same	1	leading	TFIID-dominated	ND	ND	ND	39.0317	45.64	-6.60828	40.9178	43.9914	-3.07359
YDL117W	4	247700	43.6801	36.7351	248280	ARS410.1	-920	opposite	0	lagging	TFIID-dominated	ND	ND	ND	39.6758	37.1318	2.54402	40.291	37.5161	2.77491
YDL119C	4	248280	43.6742	36.4494	247740	ARS410.0	740	opposite	1	leading	TFIID-dominated	0.00628978	-0.283035	rest	39.2969	46.1398	-6.84291	42.271	45.3521	-3.08107
YDL116W	4	251012	43.4302	38.0158	251580	ARS410.2	180	same	1	leading	TFIID-dominated	0.228248	0.438717	rest	37.8074	38.4351	-0.627683	33.0737	40.9325	-7.85875
YDL114W-A	4	254434	43.2542	38.2414	255000	ARS410.5	200	same	0.666667	leading	ND	ND	ND	ND	37.9454	40.0394	-2.09406	36.2945	42.7584	-6.46384
YDL114W	4	255103	43.8941	38.2773	255690	ARS410.5	890	same	0.666667	leading	ND	ND	ND	ND	37.96	37.3259	0.634123	40.8391	43.058	-2.21895
YDL115C	4	255672	46.0697	38.2414	255120	ARS410.5	320	opposite	0.666667	leading	TFIID-dominated	-0.352002	-0.0169841	rest	37.9033	40.6298	-2.72651	36.3655	41.3011	-4.93562
YDL112W	4	258348	50.8608	39.2983	258930	ARS410.6	1130	same	0.5	leading	TFIID-dominated	ND	ND	ND	41.6372	44.8167	-3.17951	48.9929	48.0644	0.928466
YDL113C	4	259128	49.9855	39.0571	258570	ARS410.6	770	opposite	0.5	leading	SAGA-dominated	-0.475377	-0.339882	rest	42.3433	38.663	3.68026	43.8472	44.5073	-0.660096
YDL111C	4	264680	58.719	42.6288	264150	ARS410.7	-2050	same	1	lagging	TFIID-dominated	0.378773	0.482152	rest	43.6397	42.6199	1.01979	48.2152	48.4631	-0.24791
YDL010W	4	265942	61.7653	44.35	266520	ARS410.7	320	same	0.428571	leading	TFIID-dominated	ND	ND	ND	43.0616	43.2385	-0.176924	48.8331	46.9517	1.88133
YDL108W	4	267148	62.4272	44.9934	267720	ARS410.7	1520	same	0.428571	leading	TFIID-dominated	ND	ND	ND	45.4792	44.6921	0.787131	52.2275	49.26	2.96745
YDL109C	4	268008	62.1684	44.9934	267450	ARS410.7	1250	opposite	0.428571	leading	TFIID-dominated	-0.596752	-0.0125837	rest	42.8538	43.8116	-0.957829	47.8174	47.0362	0.781214
YDL107W	4	268380	62.1684	45.8831	268950	ARS410.7	2750	same	0.428571	leading	SAGA-dominated	-0.0880019	-0.0324046	rest	50.3954	46.7533	3.64208	56.0604	55.824	0.236371
YDL105W	4	271844	70.2636	47.5779	272430	ARS410.7	6230	same	0.428571	leading	TFIID-dominated	ND	ND	ND	46.6434	47.2151	-0.571747	48.6313	51.7208	-3.08941
YDL106C	4	272472	70.0635	47.3625	271920	ARS410.7	5720	opposite	0.428571	leading	TFIID-dominated	-0.451689	0.0603381	rest	47.7047	47.9494	-0.244677	58.7992	58.1108	0.688363
YDL104C	4	275384	72.2186	48.5432	274830	ARS410.7	8630	opposite	0.428571	leading	TFIID-dominated	0.0139981	0.0594865	rest	49.2372	47.1257	2.11147	55.1116	56.4591	-1.34745
YDL102W	4	276284	71.7742	48.9817	276870	ARS410.7	10670	same	0.428571	leading	TFIID-dominated	ND	ND	ND	49.8247	52.1327	-2.30796	52.9133	54.2008	-1.2875
YDL103C	4	277152	73.827	48.9817	276600	ARS410.7	10400	opposite	0.428571	leading	TFIID-dominated	-0.534198	-0.0489574	G1	51.8939	51.1348	0.75904	52.1002	50.6182	1.48196
YDL099W	4	282860	75.8252	48.7546	283440	ARS410.7	17240	same	0.428571	leading	TFIID-dominated	ND	ND	ND	55.0751	51.1663	3.90886	55.8647	54.8714	0.993241
YDL100C	4	283720	73.9215	48.8543	283170	ARS410.7	16970	opposite	0.428571	leading	TFIID-dominated	-0.0206269	0.357586	rest	49.6684	52.5669	-2.89844	61.4524	55.2843	6.16809
YDL098C	4	285680	71.4992	48.4613	285150	ARS410.7	18950	opposite	0.428571	leading	TFIID-dominated	0.672373	0.107733	rest	52.3423	50.7976	1.54465	53.2887	53.7382	-0.449473
YDL097C	4	287248	69.7534	48.2203	286710	ARS410.7	20510	opposite	0.428571	leading	TFIID-dominated	0.489498	0.468259	rest	50.5343	43.5408	6.99357	52.2989	58.2555	-5.95659
YDL096C	4	287823	69.3584	48.1046	287280	ARS410.7	21080	opposite	0.428571	leading	TFIID-dominated	ND	ND	ND	47.869	45.1521	2.71695	52.4223	52.4458	-0.0235088
YDL093W	4	289380	71.4539	47.9482	289950	ARS412.0	-20250	opposite	0.533333	lagging	TFIID-dominated	-0.415677	-0.112357	G1	48.0374	49.2722	-1.23475	54.6492	57.0553	-2.40616
YDL094C	4	290580	68.1869	47.9482	290040	ARS412.0	-20160	same	0.533333	lagging	TFIID-dominated	ND	ND	ND	46.8684	52.9112	-6.04279	56.7906	56.7928	-0.00218002
YDL092W	4	292268	60.5345	47.8088	292830	ARS412.0	-17370	opposite	0.533333	lagging	TFIID-dominated	0.368206	0.423294	rest	44.4147	50.6017	-6.18699	54.44	57.2402	-2.80023
YDL089W	4	296036	59.5169	46.7986	296610	ARS412.0	-13590	opposite	0.533333	lagging	TFIID-dominated	ND	ND	ND	45.4262	46.7735	-1.34732	49.349	50.9434	-1.59439
YDL090C	4	296856	57.1742	46.7986	296310	ARS412.0	-13890	same	0.533333	lagging	TFIID-dominated	-0.536913	-0.522975	rest	46.361	46.5386	-0.177567	51.8673	55.5872	-3.71987
YDL088C	4	300608	47.9737	43.9057	300060	ARS412.0	-10140	same	0.533333	lagging	TFIID-dominated	0.263873	0.314759	rest	44.2844	44.9409	-0.656475	49.2791	52.2491	-2.96998
YDL086W	4	300892	47.1853	42.066	301470	ARS412.0	-8730	opposite	0.533333	lagging	TFIID-dominated	ND	ND	ND	41.3778	42.9371	-1.55924	45.8336	47.566	-1.7324
YDL087C	4	301520	47.4255	42.704	300990	ARS412.0	-9210	same	0.533333	lagging	TFIID-dominated	-0.637627	-0.00281423	rest	42.5218	44.7085	-2.18675	45.8168	53.1295	-7.31263
YDL086C-A	4	302588	50.9976	41.414	302040	ARS412.0	-8160	same	0.533333	lagging	ND	ND	ND	ND	41.3778	43.0001	-1.6223	45.6082	47.694	-2.08578
YDL085W	4	302644	50.9976	40.1006	303210	ARS412.0	-6990	opposite	0.533333	lagging	TFIID-dominated	ND	ND	ND	41.8739	44.0443	-2.17043	46.9496	48.3383	-1.38875
YDL085C-A	4	303232	51.5569	40.7561	302700	ARS412.0	-7500	same	0.533333	lagging	ND	-0.107127	-0.175392	ND	43.8371	42.97	0.86711	47.2157	48.0921	-0.876333
YDL084W	4	304572	47.2524	37.639	305160	ARS412.0	-5040	opposite	0.533333	lagging	TFIID-dominated	1.22079	1.10974	rest	40.1239	39.8627	0.26124	40.6896	42.7138	-2.02428
YDL082W	4	307868	43.2968	34.3949	308430	ARS412.0	-1770	opposite	0.533333	lagging	TFIID-dominated	ND	ND	ND	33.7667	34.87	-1.10328	40.0881	39.1199	0.968258
YDL083C	4	308328	40.0373	34.7811	307770	ARS412.0	-2430	same	0.533333	lagging	TFIID-dominated	1.96377	1.75781	rest	36.5381	36.794	-0.255912	38.7925	42.1741	-3.38155
YDL081C	4	310712	33.4799	33.319	310170	ARS412.0	-30	same	0.533333	lagging	TFIID-dominated	ND	ND	ND	31.8385	32.238	-0.399467	36.539	34.3186	2.22043
YDL080C	4	313160	30.5454	31.5532	312630	ARS412.0	2430	opposite	0	leading	TFIID-dominated	0.140373	-0.0885985	rest	36.5097	37.0574	-0.547732	36.0658	40.0933	-4.02753
YDL079C	4	315328	35.1114	29.4716	314790	ARS412.1	-610	same	1	lagging	TFIID-dominated	-0.279477	-0.544369	rest	36.1706	35.7846	0.385953	40.6578	28.3984	12.2594
YDL078C	4	316952	32.3244	27.9816	316410	ARS412.1	1010	opposite	0	leading	TFIID-dominated	-0.357294	-0.180702	rest	33.8943	36.099	-2.20469	31.6674	37.1472	-5.47988
YDL077C	4	320808	38.128	24.0866	320250	ARS412.2	-1950	same	1	lagging	TFIID-dominated	-0.508591	-0.76983	rest	37.8071	31.8425	5.96461	36.2179	30.5976	5.62033
YDL075W	4	321692	38.1258	22.165	322260	ARS412.2	60	same	1	leading	TFIID-dominated	ND	ND	ND	30.5835	29.3792	1.20431	28.4456	27.4454	1.00016
YDL076C	4	322192	37.5978	22.5912	321660	ARS412.2	-540	same	1	lagging	TFIID-dominated	0.113373	-0.336659	rest	34.6157	39.9078	-5.29216	34.2588	32.2967	1.96201
YDL073W	4	325940	36.6415	20.5151	326520	ARS413.0	2320	same	0.5	leading	TFIID-dominated	ND	ND	ND	24.427	23.0265	1.40055	22.9776	22.0892	0.888438
YDL074C	4	326736	33.6471	20.5076	326190	ARS413.0	1990	opposite	0.5	leading	TFIID-dominated	0.763873	0.495471	rest	26.1567	34.6864	-8.52972	27.6159	27.1765	0.439358
YDL070W	4	330492	37.5873	22.1293	331080	ARS413.1	880	same	0.333333	leading	SAGA-dominated	ND	ND	ND	30.9052	29.3038	1.60137	28.5317	27.4602	1.0715
YDL072C	4	331016	35.045	21.8478	330480	ARS413.1	280	opposite	0.333333	leading	TFIID-dominated	0.69454	0.357492	rest	25.8388	24.213	1.62582	23.6052	22.6017	1.00354
YDL071C	4	331540	32.9683	22.1293	330990	ARS413.1	790	opposite	0.333333	leading	SAGA-dominated	ND	ND	ND	25.4349	23.8195	1.61542	26.1371	22.8555	3.28162
YDL068W	4	332999	32.8832	23.6688	333570	ARS413.2	-1030	opposite	0	lagging	TFIID-dominated	ND	ND	ND	31.6762	27.8446	3.8316	29.4836	28.2245	1.25906
YDL066W	4	334180	35.4087	24.293	334770	ARS413.2	170	same	1	leading	TFIID-dominated	ND	ND	ND	35.2925	36.6319	-1.33949	33.4608	32.7125	0.748276
YDL067C	4	335112	36.7864	24.293	334560	ARS413.2	-40	same	0	lagging	TFIID-dominated	-0.0851269	0.668359	rest	34.8627	33.0814	1.78136	30.1206	29.4424	0.678163
YDL064W	4	336940	39.666	26.1023	337530	ARS413.2	2930	same	1	leading	TFIID-dominated	ND	ND	ND	27.9351	30.5929	-2.65785	26.9383	34.3584	-7.42011
YDL065C	4	337816	40.3281	25.8047	337260	ARS413.2	2660	opposite	1	leading	TFIID-dominated	-0.242377	0.0498704	rest	30.0914	32.7009	-2.60949	29.4218	33.677	-4.25526
YDL062W	4	339356	38.7144	27.6341	339930	ARS413.5.0	-1070	opposite	0.5	lagging	TFIID-dominated	ND	ND	ND	36.3587	36.7787	-0.420046	39.8463	34.2694	5.57687
YDL063C	4	340744	38.4646	27.6341	340200	ARS413.5.0	-800	same	0.5	lagging	TFIID-dominated	1.10644	0.415362	rest	32.4073	32.0103	0.397003	38.8193	30.5894	8.22984
YDL060W	4	341100	38.41	28.6629	341670	ARS413.5.0	670	same	0.5	leading	TFIID-dominated	ND	ND	ND	36.5856	38.2622	-1.67658	36.8379	40.3885	-3.55061
YDL061C	4	341776	38.4811	28.3053	341220	ARS413.5.0	220	opposite	0.5	leading	TFIID-dominated	2.24887	1.87743	rest	38.3575	37.6351	0.722398	40.3919	42.9927	-2.60073
YDL058W	4	345100	50.6629	32.0813	345690	ARS413.5.2	690	same	ND	leading	TFIID-dominated	ND	ND	ND	40.4106	42.6629	-2.25231	51.5141	49.5756	1.93852
YDL059C	4	345576	52.5228	31.6235	345030	ARS413.5.2	30	opposite	ND	leading	TFIID-dominated	-0.69396	-0.239951	rest	37.0244	37.6078	-0.583381	42.0062	41.3649	0.641253
YDL057W	4	350900	52.8697	36.252	351480	ARS413.5.3	-720	opposite	0	lagging	TFIID-dominated	-0.464794	-0.134501	rest	46.2353	43.665	2.57032	48.7803	51.0482	-2.2679
YDL056W	4	352268	58.3774	36.8385	352830	ARS413.5.3	630	same	0.352941	leading	TFIID-dominated	-0.205475	0.254588	rest	42.7297	43.5515	-0.821785	44.8198	46.6794	-1.85958
YDL055C	4	357408	68.034	40.5256	356850	ARS413.5.3	4650	opposite	0.352941	leading	SAGA-dominated	0.859737	2.59073	G1	45.8055	39.1249	6.68057	56.7811	55.4598	1.32134
YDL054C	4	361880	73.4222	44.3145	361350	ARS413.5.3	9150	opposite	0.352941	leading	TFIID-dominated	-0.464627	-0.112032	rest	46.9438	48.4474	-1.50362	51.7751	55.9683	-4.19318
YDL053C	4	362944	73.6157	44.9285	362400	ARS413.5.3	10200	opposite	0.352941	leading	TFIID-dominated	0.742873	0.13475	rest	48.6932	49.031	-0.337782	55.8263	57.1183	-1.29199
YDL051W	4	363412	73.8162	45.7005	363990	ARS413.5.3	11790	same	0.352941	leading	TFIID-dominated	ND	ND	ND	46.1653	44.6859	1.47938	59.1744	53.3525	5.82188
YDL052C	4	364128	73.7805	45.4595	363570	ARS413.5.3	11370	opposite	0.352941	leading	TFIID-dominated	0.661173	0.904972	rest	46.4081	48.5641	-2.15605	58.1871	51.1223	7.06476
YDL050C	4	365316	75.585	45.9298	364770	ARS413.5.3	12570	opposite	0.352941	leading	TFIID-dominated	ND	ND	ND	44.3705	43.2822	1.08828	59.4485	52.7525	6.69594
YDL049C	4	366472	76.1689	46.5809	365940	ARS413.5.3	13740	opposite	0.352941	leading	TFIID-dominated	0.00287311	-0.106267	rest	42.3415	47.0423	-4.70078	58.2132	57.1626	1.05064
YDL047W	4	368812	73.9833	47.8476	369390	ARS413.5.3	17190	same	0.352941	leading	TFIID-dominated	ND	ND	ND	50.1147	49.2608	0.853923	49.776	59.3827	-9.60676
YDL048C	4	368760	75.4537	47.4363	368220	ARS413.5.3	16020	opposite	0.352941	leading	SAGA-dominated	-0.362377	-0.227603	M	45.4164	46.4174	-1.00099	65.6902	61.4607	4.22948
YDL046W	4	370660	70.773	48.4887	371250	ARS413.5.3	19050	same	0.352941	leading	TFIID-dominated	0.84154	0.935792	rest	47.9087	51.2242	-3.31554	52.6247	53.3206	-0.695978
YDL045W-A	4	371700	72.1088	48.6445	372270	ARS413.5.3	20070	same	0.352941	leading	TFIID-dominated	0.962373	0.860445	rest	47.9809	50.8546	-2.87368	55.3299	55.0533	0.276577
YDL045C	4	374232	69.7753	48.5977	373680	ARS413.5.3	21480	opposite	0.352941	leading	TFIID-dominated	-0.0123269	-0.272922	rest	48.6887	47.4997	1.189	52.4451	59.3691	-6.92397
YDL044C	4	375816	66.0754	48.2005	375270	ARS413.5.3	23070	opposite	0.352941	leading	TFIID-dominated	-0.119984	-0.0931364	rest	45.995	43.5921	2.40296	55.309	56.4924	-1.18333
YDL043C	4	377024	63.8748	47.504	376470	ARS413.5.3	24270	opposite	0.352941	leading	TFIID-dominated	-0.164002	-0.156749	rest	49.8232	47.5386	2.28454	53.3435	57.348	-4.00447
YDL041W	4	377598	63.1859	46.6046	378180	ARS413.5.3	25980	same	0.352941	leading	TFIID-dominated	ND	ND	ND	45.8061	48.6933	-2.88718	57.7695	59.3187	-1.54917
YDL042C	4	379008	62.0482	46.278	378450	ARS413.5.3	26250	opposite	0.352941	leading	TFIID-dominated	0.00487311	-0.126817	rest	46.0623	47.6324	-1.57013	58.5988	57.0523	1.54652
YDL040C	4	381976	87.9704	44.2577	381420	ARS414.0	-26380	same	0.5625	lagging	TFIID-dominated	0.114831	0.426696	rest	46.1977	46.6537	-0.456028	54.7411	52.2771	2.46396
YDL039C	4	384578	64.3492	42.6888	384030	ARS414.0	-23770	same	0.5625	lagging	TFIID-dominated	-1.14696	-0.245671	M	48.3002	45.8925	2.40771	49.0692	54.7502	-5.68101
YDL037C	4	386084	53.6285	41.8314	385530	ARS414.0	-22270	same	0.5625	lagging	TFIID-dominated	-0.599439	-0.37508	M	45.1935	39.304	5.88943	57.2434	50.0796	7.16378
YDL036C	4	389400	44.1241	40.0445	388860	ARS414.0	-18940	same	0.5625	lagging	TFIID-dominated	-0.283127	0.13597	rest	41.8602	41.7905	0.0696857	50.3578	47.6619	2.69599
YDL034W	4	391280	43.2319	39.007	391860	ARS414.0	-15940	opposite	0.5625	lagging	TFIID-dominated	ND	ND	ND	43.4539	41.3115	2.14243	52.6006	49.2011	3.39952
YDL035C	4	392840	43.4662	38.6564	392310	ARS414.0	-15490	same	0.5625	lagging	ND	0.0437064	0.301509	rest	42.8312	40.6259	2.20529	47.9763	42.4765	5.49979
YDL032W	4	393187	43.4662	38.3147	393750	ARS414.0	-14050	opposite	0.5625	lagging	TFIID-dominated	ND	ND	ND	38.8569	37.5673	1.28956	40.662	39.3538	1.30823
YDL031W	4	393676	43.0703	38.1343	394260	ARS414.0	-13540	opposite	0.5625	lagging	TFIID-dominated	ND	ND	ND	38.3265	37.8168	0.50968	41.32	38.1334	3.18661
YDL033C	4	394456	42.3923	38.1343	393900	ARS414.0	-13900	same	0.5625	lagging	TFIID-dominated	0.388706	1.14152	rest	43.2437	39.8066	3.43711	43.7615	39.9555	3.80601
YDL030W	4	396956	35.9578	36.1067	397530	ARS414.0	-10270	opposite	0.5625	lagging	TFIID-dominated	-0.0591983	-0.314402	rest	38.6498	40.6753	-2.02557	44.4465	42.2743	2.17217
YDL029W	4	398796	36.4533	34.6507	399360	ARS414.0	-8440	opposite	0.5625	lagging	TFIID-dominated	0.211159	0.324593	rest	36.5707	32.9663	3.60442	35.8972	30.8421	5.05518
YDL028C	4	403920	36.1736	29.5241	403380	ARS414.0	-4420	same	0.5625	lagging	TFIID-dominated	-0.129581	-0.00614274	rest	35.3978	35.6044	-0.206562	32.6616	31.8186	0.842955
YDL026W	4	404246	36.3937	28.5521	404820	ARS414.0	-2980	opposite	0.5625	lagging	TFIID-dominated	ND	ND	ND	36.8521	31.8205	5.03169	27.3047	30.9419	-3.6372
YDL025W-A	4	404907	36.3331	27.7265	405480	ARS414.0	-2320	opposite	0.5625	lagging	ND	ND	ND	ND	36.6013	37.4408	-0.83951	26.4866	30.3055	-3.81889
YDL027C	4	405496	35.8208	28.1189	404940	ARS414.0	-2860	same	0.5625	lagging	TFIID-dominated	-0.0754269	-0.321229	rest	36.9593	37.6661	-0.706841	29.823	31.412	-1.58902
YDL025C	4	407904	33.1513	26.6223	407370	ARS414.0	-430	same	0.5625	lagging	TFIID-dominated	-0.419252	-0.534137	rest	33.5248	32.235	1.28984	25.1631	28.4797	-3.31652
YDL022C-A	4	410553	34.879	26.2787	410010	ARS414.1	-590	same	1	lagging	ND	ND	ND	ND	37.0912	32.7123	4.37887	31.0058	31.799	-0.793223
YDL024C	4	410354	34.9349	26.2787	409800	ARS414.1	-800	same	1	lagging	ND	-1.09669	-1.22517	rest	36.3592	32.4173	3.94193	30.975	28.0551	2.91983
YDL023C	4	412578	36.2536	26.5257	412020	ARS414.2	220	opposite	0	leading	SAGA-dominated	ND	ND	ND	30.7627	31.2918	-0.529068	31.9855	30.0569	1.92864
YDL021W	4	413444	35.7543	26.9077	414030	ARS414.3	1030	same	0.5	leading	TFIID-dominated	0.101673	-0.955116	rest	36.4841	38.4586	-1.9745	30.4645	37.815	-7.35051
YDL020C	4	417456	28.615	27.3722	416910	ARS414.3	3910	opposite	0.5	leading	TFIID-dominated	0.645373	0.5791	rest	36.9157	38.2387	-1.323	37.1226	39.9517	-2.82903
YDL019C	4	422256	35.2188	26.4846	421710	ARS415.0	-6090	same	0.666667	lagging	TFIID-dominated	-0.702097	-0.321545	rest	38.3163	30.8145	7.50185	38.0563	36.0208	2.03551
YDL017W	4	423596	38.392	24.7725	424170	ARS415.0	-3630	opposite	0.666667	lagging	TFIID-dominated	ND	ND	ND	35.1362	31.0811	4.05507	32.7344	31.4609	1.27346
YDL018C	4	424080	40.766	25.1669	423540	ARS415.0	-4260	same	0.666667	lagging	TFIID-dominated	-0.303502	-0.0112307	G1	35.1388	30.7332	4.4056	38.0075	32.8393	5.16818
YDL016C	4	426369	31.6242	23.0915	425820	ARS415.0	-1980	same	0.666667	lagging	TFIID-dominated	ND	ND	ND	32.5669	28.9395	3.62734	30.324	27.3339	2.99011
YDL014W	4	426716	29.9598	22.2749	427290	ARS415.0	-510	opposite	0.666667	lagging	TFIID-dominated	ND	ND	ND	32.3457	29.4563	2.88943	36.7918	31.2393	5.55248
YDL015C	4	427431	29.6277	22.2749	426900	ARS415.0	-900	same	0.666667	lagging	TFIID-dominated	0.756673	0.366704	rest	33.1734	27.9379	5.23544	34.7739	28.4501	6.32379
YDL013W	4	428428	30.0924	20.9171	429000	ARS415.0	1200	same	1	leading	TFIID-dominated	-0.443071	0.0115883	rest	27.2554	25.8344	1.42104	26.9381	26.647	0.291131
YDL012C	4	432560	42.6413	19.9227	432030	ARS415.1	-570	same	1	lagging	TFIID-dominated	0.322748	0.303721	rest	24.6427	27.7236	-3.08093	22.2883	24.4975	-2.20915
YDL008W	4	432972	43.2529	19.8715	433560	ARS415.1	960	same	1	leading	TFIID-dominated	0.703373	-1.04344	rest	19.9903	20.2617	-0.271385	14.912	19.0559	-4.14393
YDL011C	4	433128	43.2529	19.8786	432570	ARS415.1	-30	same	1	lagging	TFIID-dominated	ND	ND	ND	21.1964	25.3349	-4.13851	19.2672	21.5835	-2.31624
YDL009C	4	433745	44.6703	19.8629	433200	ARS415.1	600	opposite	1	leading	TFIID-dominated	ND	ND	ND	24.8856	22.4555	2.43009	19.4482	19.5753	-0.127146
YDL007W	4	437508	30.7802	20.3085	438090	ARS415.1	5490	same	1	leading	TFIID-dominated	0.387123	-0.0726588	rest	27.735	25.3128	2.42213	23.8676	25.3795	-1.51184
YDL007C-A	4	437321	30.7802	20.1828	436770	ARS415.1	4170	opposite	1	leading	ND	ND	ND	ND	39.3029	27.8522	11.4508	32.1107	27.467	4.64371
YDL006W	4	439068	33.9258	20.3249	439650	ARS415.1	7050	same	1	leading	TFIID-dominated	0.306773	-0.420553	rest	28.9251	28.4695	0.455623	28.7423	27.707	1.03528
YDL004W	4	442484	31.4552	20.2296	443070	ARS415.1	10470	same	1	leading	TFIID-dominated	ND	ND	ND	32.5047	29.0712	3.43355	29.0439	29.1856	-0.141672
YDL005C	4	442856	31.9572	20.2181	442320	ARS415.1	9720	opposite	1	leading	TFIID-dominated	0.123516	-0.265041	rest	30.3184	36.4098	-6.09146	29.6566	35.7517	-6.09507
YDL003W	4	444060	35.0311	20.4077	444630	ARS415.1	12030	same	1	leading	SAGA-dominated	0.193587	1.10056	G1	30.6427	33.0512	-2.40849	34.6407	31.7219	2.91883
YDL001W	4	447412	36.7669	22.0025	447990	ARS416.0	-13810	opposite	0.4	lagging	TFIID-dominated	ND	ND	ND	31.7777	30.3153	1.4624	27.9331	28.7989	-0.865809
YDL002C	4	448184	33.2576	21.6718	447630	ARS416.0	-14170	same	0.4	lagging	TFIID-dominated	0.249123	0.0206143	rest	31.8125	33.5168	-1.70438	31.2486	30.7678	0.480828
YDR002W	4	452476	31.8353	25.321	453060	ARS416.0	-8740	opposite	0.4	lagging	TFIID-dominated	ND	ND	ND	29.7001	36.6856	-6.98543	38.3632	29.5106	8.8526
YDR001C	4	453224	32.8184	25.1174	452670	ARS416.0	-9130	same	0.4	lagging	SAGA-dominated	-0.0759814	-0.130505	G1	35.813	34.3665	1.44654	35.3758	31.9725	3.40327
YDR003W	4	453619	33.4971	25.569	454200	ARS416.0	-7600	opposite	0.4	lagging	TFIID-dominated	0.388206	0.220104	rest	28.2694	29.6432	-1.37383	30.24	28.7207	1.51936
YDR004W	4	454724	33.535	25.6044	455310	ARS416.0	-6490	opposite	0.4	lagging	TFIID-dominated	0.194973	0.0547941	rest	30.327	29.3979	0.929133	35.9704	30.3106	5.65981
YDR003W-A	4	454279	33.7782	25.6123	454860	ARS416.0	-6940	opposite	0.4	lagging	ND	ND	ND	ND	28.3198	29.4729	-1.15309	29.1046	28.781	0.32362
YDR005C	4	458736	23.425	24.7946	458190	ARS416.0	-3610	same	0.4	lagging	TFIID-dominated	0.353445	-0.183462	rest	28.102	26.8465	1.25558	25.4162	25.219	0.197164
YDR007W	4	461148	27.5703	23.6184	461730	ARS416.0	-70	opposite	0.4	lagging	TFIID-dominated	ND	ND	ND	25.284	25.5918	-0.307745	22.4256	22.88	-0.454358
YDR006C	4	461888	24.9983	23.6184	461340	ARS416.0	-460	same	0.4	lagging	TFIID-dominated	0.133723	0.356308	rest	30.5717	27.6238	2.94795	26.0152	28.0867	-2.07148
YDR009W	4	462748	21.9238	23.3858	463320	ARS416.0	1520	same	0.5	leading	ND	-0.880738	-0.646661	rest	26.7636	25.8222	0.941488	27.2825	26.4072	0.875368
YDR008C	4	463099	21.8473	23.4415	462540	ARS416.0	740	opposite	0.5	leading	TFIID-dominated	ND	ND	ND	24.5456	23.9433	0.602265	22.3868	21.8936	0.493149
YDR011W	4	465100	26.6524	23.3907	465690	ARS416.1	290	same	1	leading	SAGA-dominated	-0.0580793	0.0152237	G2	30.0584	31.3251	-1.26671	29.0373	30.3766	-1.33925
YDR010C	4	465880	28.8906	23.3907	465330	ARS416.1	-70	same	nd	lagging	ND	ND	ND	ND	25.2496	27.3765	-2.12689	29.2277	26.3933	2.83445
YDR012W	4	471308	35.5989	24.2504	471870	ARS417.0	-6330	opposite	0.2	lagging	TFIID-dominated	1.46462	0.892981	rest	39.5674	30.9405	8.62692	36.4652	33.0915	3.37364
YDR013W	4	472652	36.8025	24.4731	473220	ARS417.0	-4980	opposite	0.2	lagging	TFIID-dominated	ND	ND	ND	34.3264	36.8851	-2.55872	35.3801	33.1167	2.26343
YDR014W	4	473492	36.9679	24.6052	474060	ARS417.0	-4140	opposite	0.2	lagging	TFIID-dominated	-0.376913	-0.489148	rest	29.5856	30.3255	-0.739898	27.2822	26.7313	0.550886
YDR014W-A	4	477252	34.0783	24.898	477840	ARS417.0	-360	opposite	0.2	lagging	ND	ND	ND	ND	35.5056	36.9371	-1.43151	29.2933	31.506	-2.21269
YDR015C	4	478696	34.0541	24.912	478140	ARS417.0	-60	same	0.2	lagging	ND	ND	ND	ND	35.0035	36.7823	-1.77885	29.2085	31.3099	-2.10141
YDR016C	4	479289	33.847	24.9168	478740	ARS417.0	540	opposite	0	leading	TFIID-dominated	0.267873	0.239906	rest	29.8338	33.3812	-3.54741	30.8074	28.8689	1.93847
YDR017C	4	482881	30.8604	24.4151	482340	ARS417.1	140	opposite	0	leading	TFIID-dominated	0.0917398	0.15769	rest	28.7616	37.1392	-8.37767	31.3393	34.7454	-3.40609
YDR018C	4	484369	35.0881	24.0893	483810	ARS417.2	-1190	same	1	lagging	ND	0.153123	-0.488966	rest	29.1921	26.9428	2.2493	27.0444	29.3426	-2.29816
YDR019C	4	485862	40.307	23.4853	485310	ARS417.2	310	opposite	0	leading	SAGA-dominated	-0.133227	-0.336323	rest	30.8395	35.865	-5.02553	29.2387	31.9567	-2.71802
YDR021W	4	486205	41.7634	22.8572	486780	ARS417.3	980	same	0.5	leading	TFIID-dominated	ND	ND	ND	39.595	34.4458	5.14922	32.5589	35.4329	-2.87399
YDR020C	4	486941	43.3512	22.8572	486390	ARS417.3	590	opposite	0.5	leading	TFIID-dominated	0.125373	-0.462324	rest	30.1502	28.5557	1.5945	29.7662	35.5646	-5.79841
YDR023W	4	489005	40.4397	22.0737	489570	ARS417.4	-1830	opposite	0.333333	lagging	TFIID-dominated	ND	ND	ND	37.2455	37.1905	0.0549585	39.2771	39.6816	-0.404505
YDR022C	4	489257	39.0175	22.2292	488700	ARS417.4	-2700	same	0.333333	lagging	TFIID-dominated	-0.42346	-0.299264	rest	37.3347	32.0921	5.2426	34.6283	31.8305	2.7978
YDR024W	4	490514	35.3148	22.082	491100	ARS417.4	-300	opposite	0.333333	lagging	ND	ND	ND	ND	34.7221	37.6707	-2.94868	37.1506	32.2835	4.86709
YDR025W	4	491012	35.2657	22.1526	491580	ARS417.4	180	same	0.333333	leading	TFIID-dominated	2.08587	1.80202	rest	36.5526	36.3491	0.203539	31.6122	35.0032	-3.39104
YDR026C	4	494913	33.8512	23.2665	494370	ARS417.4	2970	opposite	0.333333	leading	TFIID-dominated	0.124523	0.0572824	rest	33.8504	37.4135	-3.56314	34.0174	37.8666	-3.84923
YDR027C	4	497937	34.4951	25.0237	497400	ARS417.4	6000	opposite	0.333333	leading	TFIID-dominated	-0.229627	-0.142911	rest	30.294	36.7881	-6.49408	32.7809	41.2413	-8.46045
YDR029W	4	500597	33.2041	26.125	501180	ARS417.5.0	-3420	opposite	0.5	lagging	TFIID-dominated	ND	ND	ND	34.3538	26.5375	7.81633	29.8665	28.9596	0.906845
YDR028C	4	501889	34.8044	26.1196	501330	ARS417.5.0	-3270	same	0.5	lagging	TFIID-dominated	-0.083984	0.0796292	rest	35.3131	31.2864	4.0267	33.1623	29.0609	4.10138
YDR031W	4	502973	37.562	25.7371	503550	ARS417.5.0	-1050	opposite	0.5	lagging	TFIID-dominated	ND	ND	ND	24.2747	22.6019	1.67285	23.0006	23.7751	-0.774536
YDR030C	4	503801	38.6438	25.878	503250	ARS417.5.0	-1350	same	0.5	lagging	TFIID-dominated	ND	ND	ND	28.0007	23.3613	4.6394	24.544	23.0996	1.44444
YDR032C	4	505322	38.8444	25.3986	504780	ARS417.5.0	180	opposite	0.5	leading	TFIID-dominated	-0.011238	-0.565075	rest	22.91	24.0196	-1.10958	23.4528	22.9917	0.461039
YDR033W	4	507310	38.1018	24.3676	507900	ARS417.5.0	3300	same	0.5	leading	SAGA-dominated	1.20687	-0.486822	M	28.991	29.2789	-0.287926	26.5672	28.0974	-1.53013
YDR034C	4	512754	0	25.3182	512220	ARS417.5.0	7620	opposite	0.5	leading	TFIID-dominated	0.583998	0.153	rest	29.7032	36.059	-6.35582	29.7433	40.2351	-10.4918
YDR034W-B	4	520774	47.7211	35.0724	521340	ARS417.5.0	16740	same	0.5	leading	ND	ND	ND	ND	38.2242	38.4257	-0.201462	43.4766	40.2241	3.25248
YDR034C-A	4	521189	48.0972	34.8992	520650	ARS417.5.0	16050	opposite	0.5	leading	ND	ND	-0.548258	ND	40.7647	41.6675	-0.902811	45.4268	46.6498	-1.22297
YDR035W	4	521278	49.0904	35.2122	521850	ARS417.5.0	17250	same	0.5	leading	TFIID-dominated	0.0642898	1.00578	rest	37.9941	40.1299	-2.13579	41.9891	39.2518	2.73732
YDR037W	4	524886	83.8634	35.8109	525450	ARS418.0	-18750	opposite	0.75	lagging	TFIID-dominated	ND	ND	ND	46.0501	45.1489	0.901261	42.5317	47.2249	-4.69319
YDR036C	4	525282	93.6813	35.7102	524730	ARS418.0	-19470	same	0.75	lagging	TFIID-dominated	-0.0767269	0.0366816	rest	42.14	43.0139	-0.873929	45.3157	43.761	1.55473
YDR038C	4	531194	R	33.9642	530640	ARS418.0	-13560	same	0.75	lagging	TFIID-dominated	ND	ND	ND	0	0		0	0
YDR039C	4	535079	R	27.3614	534540	ARS418.0	-9660	same	0.75	lagging	TFIID-dominated	ND	ND	ND	0	0		0	0
YDR041W	4	539270	37.9418	22.2289	539850	ARS418.0	-4350	opposite	0.75	lagging	TFIID-dominated	ND	ND	ND	33.8724	36.5343	-2.6619	35.4529	32.7218	2.73104
YDR040C	4	538964	38.9512	22.6608	538410	ARS418.0	-5790	same	0.75	lagging	TFIID-dominated	-0.877377	-0.700127	rest	0	0		0	0
YDR042C	4	541700	37.2811	21.8585	541170	ARS418.0	-3030	same	0.75	lagging	TFIID-dominated	1.31254	0.133336	rest	33.6346	38.6324	-4.9978	34.1321	32.2174	1.91468
YDR043C	4	544066	30.4774	21.3562	543510	ARS418.0	-690	same	0.75	lagging	SAGA-dominated	0.202686	0.200825	rest	37.3917	31.2957	6.09594	34.6839	28.6785	6.00541
YDR044W	4	545910	34.1808	20.3254	546480	ARS418.1	-320	opposite	0	lagging	TFIID-dominated	-0.470277	-0.199208	rest	28.9215	26.4175	2.50399	25.4587	25.8315	-0.372763
YDR045C	4	548954	30.4906	19.4509	548400	ARS418.1	1600	opposite	0	leading	TFIID-dominated	0.755623	-0.0776321	rest	32.6089	35.7753	-3.16646	27.1322	28.7661	-1.63394
YDR047W	4	550926	32.0386	18.3398	551490	ARS418.3	-310	opposite	0	lagging	TFIID-dominated	ND	ND	ND	19.5436	20.5498	-1.00623	18.58	19.6657	-1.08571
YDR046C	4	551186	32.0386	18.6512	550650	ARS418.2	450	opposite	0	leading	SAGA-dominated	0.372873	1.0004	rest	26.4119	24.9585	1.45337	22.6347	23.4494	-0.81468
YDR049W	4	552726	33.6234	18.0351	553290	ARS418.4	-510	opposite	0.5	lagging	TFIID-dominated	-0.357689	-0.264185	rest	12.9636	15.1623	-2.19875	11.3906	13.8535	-2.46289
YDR048C	4	553896	29.9168	17.984	553350	ARS418.4	-450	same	0.5	lagging	TFIID-dominated	ND	ND	ND	17.1913	23.775	-6.58375	11.3906	19.7444	-8.35377
YDR050C	4	557010	33.5479	18.3004	556470	ARS418.5	270	opposite	0	leading	SAGA-dominated	2.22557	1.95571	rest	20.0129	21.066	-1.05312	17.6284	20.1309	-2.50245
YDR051C	4	558602	33.8913	18.8663	558060	ARS418.5	1860	opposite	0	leading	TFIID-dominated	-0.0922936	-0.118248	rest	24.1348	30.0906	-5.95585	23.3662	23.1334	0.232872
YDR053W	4	559747	30.986	19.9241	560310	ARS418.6	-290	opposite	0	lagging	TFIID-dominated	ND	ND	ND	37.563	26.5722	10.9907	26.0492	25.2634	0.785788
YDR052C	4	561274	30.1733	20.2168	560730	ARS418.6	130	opposite	0	leading	TFIID-dominated	0.227123	0.0552406	rest	28.1663	39.0559	-10.8896	28.986	26.2888	2.69717
YDR055W	4	562958	30.5612	21.9148	563520	ARS419.1	-1080	opposite	0	lagging	SAGA-dominated	ND	ND	ND	27.7763	27.4632	0.313107	26.2826	29.5659	-3.28326
YDR054C	4	563010	30.5612	21.3801	562470	ARS419.0	270	opposite	0	leading	TFIID-dominated	0.0431231	0.0109483	rest	26.4354	26.67	-0.234664	25.5495	24.0381	1.51141
YDR057W	4	565382	38.8377	22.8297	565950	ARS419.2	-650	opposite	0.5	lagging	TFIID-dominated	ND	ND	ND	27.763	27.6646	0.0984145	25.2723	26.7226	-1.45032
YDR056C	4	566218	37.8007	22.8297	565680	ARS419.2	-920	same	0.5	lagging	TFIID-dominated	0.0573731	-0.353557	rest	25.7379	29.2082	-3.47031	24.7169	28.0932	-3.37633
YDR058C	4	569234	37.2763	23.8805	568680	ARS419.4	-120	same	1	lagging	TFIID-dominated	-0.306527	-1.18732	rest	29.071	28.9234	0.147587	30.0736	29.3499	0.72378
YDR060W	4	570070	37.1105	24.5816	570660	ARS419.5	460	same	1	leading	TFIID-dominated	ND	ND	ND	35.3603	34.81	0.550307	33.122	36.0648	-2.94285
YDR059C	4	570330	37.1105	24.2133	569790	ARS419.5	-410	same	nd	lagging	TFIID-dominated	0.0908731	-0.527186	rest	34.4151	32.9858	1.42935	31.3697	29.3008	2.06892
YDR061W	4	573654	39.811	26.4973	574230	ARS419.6	430	same	0.857143	leading	TFIID-dominated	0.00508739	-0.0435393	rest	34.7714	39.4335	-4.66213	30.7521	35.9296	-5.1775
YDR062W	4	575574	46.7123	28.1143	576150	ARS419.6	2350	same	0.857143	leading	TFIID-dominated	0.513595	0.42439	rest	37.083	35.8534	1.22956	36.6763	38.5378	-1.86144
YDR063W	4	578038	45.1688	30.4618	578610	ARS419.6	4810	same	0.857143	leading	TFIID-dominated	1.39404	0.507346	rest	37.1048	36.2008	0.904022	35.222	39.8829	-4.66091
YDR064W	4	578918	44.5254	31.4472	579480	ARS419.6	5680	same	0.857143	leading	TFIID-dominated	2.51937	2.33242	rest	40.2168	43.7859	-3.56909	37.3145	39.1871	-1.87258
YDR065W	4	580142	48.3626	32.4474	580710	ARS419.6	6910	same	0.857143	leading	TFIID-dominated	0.266498	0.0418682	rest	40.4988	41.6682	-1.16947	45.7235	45.4115	0.312057
YDR068W	4	583158	52.9692	35.4753	583740	ARS419.6	9940	same	0.857143	leading	TFIID-dominated	ND	ND	ND	40.8558	42.8762	-2.02045	46.0701	46.1845	-0.114439
YDR067C	4	584026	55.7573	35.4753	583470	ARS419.6	9670	opposite	0.857143	leading	TFIID-dominated	0.18754	-0.231391	rest	41.6606	41.7148	-0.054138	46.1744	45.4115	0.762879
YDR069C	4	588274	59.6192	39.1003	587730	ARS420.0	-13670	same	0.444444	lagging	TFIID-dominated	-0.241491	-0.458965	rest	43.6428	42.366	1.2768	44.415	44.3323	0.0827483
YDR070C	4	588946	60.8956	39.8844	588390	ARS420.0	-13010	same	0.444444	lagging	ND	0.957873	-0.480818	rest	44.5944	40.6907	3.90371	43.171	43.6988	-0.527848
YDR071C	4	590034	62.1841	40.6246	589500	ARS420.0	-11900	same	0.444444	lagging	TFIID-dominated	0.943206	0.127183	rest	44.6839	42.7735	1.91035	46.2183	49.0572	-2.83888
YDR073W	4	591694	65.1404	42.2692	592260	ARS420.0	-9140	opposite	0.444444	lagging	TFIID-dominated	ND	ND	ND	49.264	46.5851	2.67893	57.3237	51.0675	6.25624
YDR072C	4	592034	65.7871	41.967	591480	ARS420.0	-9920	same	0.444444	lagging	TFIID-dominated	0.884802	0.882233	rest	44.6505	43.9082	0.742336	52.6466	55.7242	-3.0776
YDR074W	4	593158	67.3945	43.0801	593730	ARS420.0	-7670	opposite	0.444444	lagging	TFIID-dominated	-0.0123769	0.204913	rest	46.1751	44.4618	1.71332	49.1185	51.892	-2.77341
YDR075W	4	596470	68.1035	44.3326	597060	ARS420.0	-4340	opposite	0.444444	lagging	TFIID-dominated	-0.0435019	-0.0327297	rest	50.2327	47.1009	3.13185	53.1122	55.2842	-2.17193
YDR076W	4	597918	65.6666	44.5411	598500	ARS420.0	-2900	opposite	0.444444	lagging	TFIID-dominated	ND	ND	ND	49.7625	43.676	6.08652	56.8543	57.2835	-0.42919
YDR077W	4	600246	71.0331	44.4506	600810	ARS420.0	-590	opposite	0.444444	lagging	TFIID-dominated	0.722123	1.36958	M	47.9365	50.7406	-2.80404	54.4192	55.9106	-1.49143
YDR079W	4	602534	68.6176	43.8493	603120	ARS420.0	1720	same	0.5	leading	TFIID-dominated	ND	ND	ND	48.7102	48.626	0.0841634	59.0195	53.3318	5.68773
YDR078C	4	603434	70.2692	43.8493	602880	ARS420.0	1480	opposite	0.5	leading	TFIID-dominated	0.86554	0.375618	rest	50.2719	48.4146	1.85732	58.6335	55.0382	3.59537
YDR080W	4	603470	70.2692	43.5318	604050	ARS420.0	2650	same	0.5	leading	TFIID-dominated	ND	ND	ND	46.091	47.7623	-1.67126	55.5951	51.773	3.82214
YDR079C-A	4	604362	70.3774	43.6929	603810	ARS420.0	2410	opposite	0.5	leading	ND	0.605373	-0.0999471	ND	49.2546	48.7461	0.508478	59.8231	53.9155	5.90765
YDR082W	4	609838	64.0036	42.058	610410	ARS420.1	-8590	opposite	0	lagging	TFIID-dominated	ND	ND	ND	45.2027	43.5166	1.68614	50.8818	53.8551	-2.97332
YDR081C	4	610666	61.4998	42.058	610110	ARS420.0	8710	opposite	0.5	leading	TFIID-dominated	0.0384148	0.239351	rest	47.1782	46.2383	0.939842	53.4123	51.9672	1.44504
YDR083W	4	611558	59.2662	42.0991	612120	ARS420.1	-6880	opposite	0	lagging	TFIID-dominated	ND	ND	ND	45.2691	42.733	2.53608	49.8167	47.5375	2.27918
YDR084C	4	614571	59.5989	42.3137	614040	ARS420.1	-4960	same	0	lagging	TFIID-dominated	0.124373	-0.445536	rest	44.8939	45.219	-0.325073	51.9431	49.4875	2.45561
YDR085C	4	616835	53.8237	42.3489	616290	ARS420.1	-2710	same	0	lagging	SAGA-dominated	-0.139814	-0.79941	M/G1	44.6734	44.2761	0.397234	51.7475	51.3335	0.413987
YDR086C	4	617771	53.2051	42.1895	617220	ARS420.1	-1780	same	0	lagging	SAGA-dominated	0.945206	0.692313	rest	42.9555	44.3731	-1.4176	51.0862	48.1105	2.97574
YDR087C	4	618835	50.3954	41.8702	618300	ARS420.1	-700	same	0	lagging	TFIID-dominated	0.456623	0.467069	rest	43.457	44.429	-0.972056	52.8193	48.5216	4.29763
YDR088C	4	620142	46.109	41.0578	619590	ARS420.1	590	opposite	nd	leading	TFIID-dominated	-0.635527	-0.340407	rest	44.8663	42.2798	2.58649	44.1654	47.768	-3.60265
YDR089W	4	621487	43.1594	38.8769	622050	ARS420.3	-1350	opposite	0	lagging	TFIID-dominated	0.16224	-0.111914	G2	43.7956	41.6743	2.12131	46.727	41.9743	4.75273
YDR090C	4	626611	42.0756	34.7545	626070	ARS420.4	-530	same	1	lagging	TFIID-dominated	0.396873	0.0159681	rest	40.5942	39.2141	1.38014	44.6937	38.9559	5.73776
YDR092W	4	629303	40.9247	32.871	629880	ARS420.6	-1120	opposite	0	lagging	SAGA/TFIID	ND	ND	ND	40.4114	37.7645	2.6469	48.599	44.0825	4.51642
YDR091C	4	629099	41.4998	33.1565	628560	ARS420.5	160	opposite	0	leading	ND	0.547318	0.736966	rest	34.5663	36.3614	-1.79509	35.5436	43.5281	-7.98449
YDR093W	4	630779	37.2441	32.8124	631350	ARS420.6	350	same	nd	leading	ND	-0.236927	0.454399	rest	39.5867	40.5973	-1.01059	39.6724	41.3403	-1.66796
YDR094W	4	635337	39.1268	34.4527	635910	ARS421.0	-690	opposite	0	lagging	TFIID-dominated	ND	ND	ND	41.308	36.0372	5.27086	38.3776	37.8553	0.522367
YDR096W	4	636079	38.9023	34.9917	636660	ARS421.0	60	same	1	leading	SAGA-dominated	-0.400319	0.0270964	rest	34.7388	36.2093	-1.47051	36.1145	35.9614	0.153102
YDR095C	4	637024	39.856	34.9917	636480	ARS421.0	-120	same	0	lagging	TFIID-dominated	ND	ND	ND	37.165	35.8982	1.26686	38.3782	40.1263	-1.74812
YDR097C	4	644411	0	38.1923	643860	ARS421.0	7260	opposite	1	leading	TFIID-dominated	-0.385274	0.180026	G1	38.4746	37.3478	1.12686	38.7585	42.5721	-3.81365
YDR098C	4	645483	0	38.5089	644940	ARS421.0	8340	opposite	1	leading	TFIID-dominated	0.26754	0.313385	rest	0	0		0	0
YDR099W	4	652159	51.1517	41.6883	652740	ARS421.0	16140	same	1	leading	TFIID-dominated	1.00375	0.983534	rest	40.1807	41.2159	-1.03515	47.7215	43.9506	3.7708
YDR100W	4	654479	55.7921	42.3997	655050	ARS421.0	18450	same	1	leading	ND	0.513623	0.0846515	rest	40.693	43.1928	-2.49984	43.1492	43.0714	0.0778426
YDR103W	4	657287	55.7472	43.0265	657870	ARS422.0	-17130	opposite	0.625	lagging	TFIID-dominated	ND	ND	ND	43.9924	46.1343	-2.14184	48.7297	49.6241	-0.894351
YDR101C	4	658011	53.7234	43.0265	657480	ARS422.0	-17520	same	0.625	lagging	TFIID-dominated	0.592248	1.00258	rest	43.9072	41.9326	1.97461	47.9215	45.8831	2.03832
YDR102C	4	658477	53.5489	43.168	657930	ARS422.0	-17070	same	0.625	lagging	TFIID-dominated	ND	ND	ND	43.6371	44.3604	-0.723342	49.8906	45.8018	4.08875
YDR104C	4	665467	86.4102	45.2431	664920	ARS422.0	-10080	same	0.625	lagging	TFIID-dominated	-0.681252	-0.389804	rest	43.8976	45.5108	-1.61313	52.2672	50.5315	1.73565
YDR106W	4	666501	79.8059	45.4793	667080	ARS422.0	-7920	opposite	0.625	lagging	TFIID-dominated	ND	ND	ND	54.2349	54.2064	0.0284926	56.0005	55.3894	0.611129
YDR105C	4	667331	75.5913	45.4456	666780	ARS422.0	-8220	same	0.625	lagging	TFIID-dominated	-0.14677	-0.0726283	rest	44.0334	44.9961	-0.962637	53.4912	54.1049	-0.613707
YDR108W	4	670727	74.5383	45.2926	671310	ARS422.0	-3690	opposite	0.625	lagging	TFIID-dominated	ND	ND	ND	47.5223	49.3634	-1.84108	53.175	52.3973	0.777707
YDR107C	4	671539	74.9315	45.2926	670980	ARS422.0	-4020	same	0.625	lagging	TFIID-dominated	-0.48371	0.662973	rest	53.4028	52.2656	1.13712	54.9213	57.7354	-2.8141
YDR110W	4	675543	74.7332	44.9413	676110	ARS422.0	1110	same	0.5	leading	TFIID-dominated	ND	ND	ND	44.0318	51.0888	-7.05703	53.4782	52.7325	0.745729
YDR109C	4	676355	72.4694	44.9581	675810	ARS422.0	810	opposite	0.5	leading	TFIID-dominated	-0.463198	0.069722	rest	49.0358	49.5581	-0.522293	53.7999	54.6067	-0.806764
YDR112W	4	679041	65.2491	44.7797	679620	ARS422.0	4620	same	0.5	leading	TFIID-dominated	ND	ND	ND	47.3141	46.4915	0.822534	59.2851	59.2225	0.0625929
YDR111C	4	680499	61.5937	44.7303	679950	ARS422.0	4950	opposite	0.5	leading	ND	0.233273	0.597019	rest	47.3141	48.404	-1.08994	57.4372	58.3427	-0.90555
YDR115W	4	681631	60.4561	44.414	682200	ARS422.1	-6800	opposite	0	lagging	TFIID-dominated	ND	ND	ND	45.5608	48.2092	-2.6484	54.1428	54.3471	-0.20421
YDR113C	4	682227	60.8065	44.5128	681690	ARS422.0	6690	opposite	0.5	leading	TFIID-dominated	-0.324502	0.783477	G1	49.4109	47.5081	1.90279	59.7405	53.1473	6.59321
YDR114C	4	682723	61.446	44.414	682170	ARS422.1	-6830	same	0	lagging	TFIID-dominated	ND	ND	ND	46.0721	49.8804	-3.8083	53.477	55.8185	-2.34144
YDR116C	4	684123	61.0092	44.0286	683580	ARS422.1	-5420	same	0	lagging	TFIID-dominated	0.0902481	0.228533	rest	44.1882	44.8488	-0.660531	54.8967	51.9331	2.96357
YDR118W	4	685379	57.6717	43.2905	685950	ARS422.1	-3050	opposite	0	lagging	TFIID-dominated	ND	ND	ND	44.8178	45.6726	-0.854772	48.8398	52.7546	-3.91484
YDR117C	4	686187	56.9628	43.2905	685650	ARS422.1	-3350	same	0	lagging	TFIID-dominated	-0.451341	-0.0999816	rest	44.0142	44.0956	-0.081371	47.9861	50.3731	-2.38703
YDR118W-A	4	687265	56.3593	42.3074	687840	ARS422.1	-1160	opposite	0	lagging	ND	ND	ND	ND	43.2452	44.6799	-1.43472	47.6044	52.7494	-5.14502
YDR119W	4	687639	55.4617	42.0301	688200	ARS422.1	-800	opposite	0	lagging	TFIID-dominated	0.232561	0.60071	rest	43.4931	42.6796	0.813499	47.2361	46.6178	0.618293
YDR119W-A	4	690479	46.8524	40.1604	691050	ARS422.1	2050	same	nd	leading	ND	ND	ND	ND	44.673	45.0047	-0.33169	49.3037	47.6251	1.6786
YDR121W	4	692951	41.4956	38.3242	693540	ARS422.2	-1460	opposite	ND	lagging	ND	ND	ND	ND	42.8222	43.0749	-0.252672	48.5338	47.9662	0.567572
YDR120C	4	693739	40.0619	38.7115	693180	ARS422.2	-1820	same	ND	lagging	SAGA/TFIID	0.0247731	0.189052	rest	41.6446	43.167	-1.52246	45.7919	47.9398	-2.14793
YDR122W	4	693903	40.0619	37.9296	694470	ARS422.2	-530	opposite	ND	lagging	TFIID-dominated	-0.286627	0.153061	rest	39.663	40.5707	-0.907739	46.0753	38.8985	7.17686
YDR124W	4	699239	39.3997	33.8847	699810	ARS422.4	-390	opposite	0.5	lagging	TFIID-dominated	ND	ND	ND	32.4243	35.2677	-2.84342	34.0411	30.1928	3.84825
YDR123C	4	700051	37.4666	33.8847	699510	ARS422.4	-690	same	0.5	lagging	TFIID-dominated	-0.697427	0.0687316	rest	41.3006	37.9742	3.3264	43.67	40.3259	3.34405
YDR126W	4	702719	37.8333	32.7861	703290	ARS422.5	-310	opposite	0.5	lagging	TFIID-dominated	ND	ND	ND	38.8488	38.4321	0.41674	44.2844	36.2625	8.02191
YDR125C	4	703235	40.0704	32.816	702690	ARS422.5	-910	same	0.5	lagging	TFIID-dominated	-0.434841	-0.73119	rest	32.6062	34.6421	-2.03597	35.8767	31.5309	4.34575
YDR127W	4	703903	40.5299	32.8726	704490	ARS422.5	890	same	1	leading	TFIID-dominated	0.112973	1.00899	rest	37.7681	36.9513	0.816787	41.2058	39.7258	1.47997
YDR128W	4	709015	45.3848	35.666	709590	ARS422.7	590	same	1	leading	ND	-0.349627	0.203541	rest	40.997	44.1113	-3.11431	41.7977	40.8077	0.990081
YDR129C	4	715899	57.1058	38.1136	715350	ARS422.8	2550	opposite	0	leading	TFIID-dominated	ND	ND	ND	43.6918	45.2855	-1.59372	46.8252	46.9512	-0.126086
YDR130C	4	717139	58.208	38.4372	716580	ARS422.8	3780	opposite	0	leading	TFIID-dominated	-0.0836269	-0.0757522	G2	42.6187	43.4677	-0.848931	47.5374	46.6376	0.899848
YDR131C	4	719051	55.6543	38.6521	718500	ARS422.9	-3300	same	1	lagging	TFIID-dominated	-0.316544	-0.436352	rest	40.7231	40.8137	-0.090653	45.6036	45.8637	-0.260136
YDR132C	4	720915	56.6078	38.6999	720360	ARS422.9	-1440	same	1	lagging	SAGA-dominated	1.12847	0.275177	rest	44.4458	42.3696	2.07621	49.7222	52.4262	-2.70402
YDR133C	4	721794	57.8822	38.6936	721260	ARS422.9	-540	same	1	lagging	TFIID-dominated	ND	ND	ND	40.4926	42.1061	-1.61359	48.988	53.015	-4.02695
YDR137W	4	727655	65.6871	37.7312	728220	ARS422.9	6420	same	0.333333	leading	TFIID-dominated	ND	ND	ND	44.3806	46.601	-2.22044	50.5722	49.2236	1.34861
YDR135C	4	728115	65.9117	37.8409	727560	ARS422.9	5760	opposite	0.333333	leading	TFIID-dominated	0.0256889	0.233998	rest	44.8745	45.6877	-0.813132	51.3222	53.2147	-1.89253
YDR136C	4	728780	66.2036	37.7312	728250	ARS422.9	6450	opposite	0.333333	leading	TFIID-dominated	ND	ND	ND	41.9245	46.2671	-4.34255	53.8107	50.3787	3.43197
YDR138W	4	730055	67.0171	37.1486	730620	ARS422.5.0	-5180	opposite	ND	lagging	TFIID-dominated	0.0321588	0.239543	rest	45.6878	43.5007	2.18708	50.608	53.1116	-2.5036
YDR140W	4	733631	58.8097	36.2518	734220	ARS422.5.0	-1580	opposite	ND	lagging	TFIID-dominated	ND	ND	ND	43.255	44.8654	-1.61038	50.2758	49.0267	1.24906
YDR139C	4	734467	58.0168	36.2518	733920	ARS422.5.0	-1880	same	ND	lagging	TFIID-dominated	ND	ND	ND	44.2872	45.769	-1.48178	49.1135	51.8437	-2.73019
YDR141C	4	740539	47.1545	35.5101	739980	ARS422.5.1	-2220	same	ND	lagging	TFIID-dominated	-0.0672058	0.288498	rest	43.1642	42.3357	0.828498	48.9236	48.3274	0.59623
YDR142C	4	742275	46.4548	35.7116	741720	ARS422.5.1	-480	same	ND	lagging	TFIID-dominated	0.0760398	0.0618173	rest	41.3973	41.6861	-0.288781	42.231	46.7357	-4.50473
YDR143C	4	744531	44.9501	36.0742	744000	ARS422.5.2	200	opposite	0	leading	TFIID-dominated	0.272748	0.551982	rest	40.3135	41.0567	-0.743284	44.7286	40.9013	3.82722
YDR145W	4	746151	46.99	35.8931	746730	ARS422.5.3	530	same	1	leading	TFIID-dominated	ND	ND	ND	36.1547	34.1751	1.97956	30.7484	33.312	-2.56356
YDR144C	4	746739	46.8294	35.9943	746190	ARS422.5.3	-10	same	nd	lagging	SAGA-dominated	0.0338106	0.515653	G1	38.4693	39.3727	-0.903472	41.2808	44.8769	-3.5961
YDR147W	4	750703	43.3345	33.7915	751290	ARS422.5.6	290	same	1	leading	TFIID-dominated	ND	ND	ND	35.464	35.4947	-0.0307543	32.9479	33.1566	-0.208633
YDR146C	4	751411	41.3839	34.0808	750870	ARS422.5.6	-130	same	nd	lagging	TFIID-dominated	-0.0627769	-0.789826	M	38.6385	36.0871	2.55143	37.668	36.5613	1.10669
YDR148C	4	755819	89.6519	32.3034	755280	ARS423.2	280	opposite	0.538462	leading	SAGA-dominated	-0.233877	0.159869	rest	38.2409	38.6292	-0.388249	38.8169	38.8703	-0.0533527
YDR149C	4	756759	72.3594	32.3526	756210	ARS423.2	1210	opposite	0.538462	leading	TFIID-dominated	ND	ND	ND	39.3559	40.4275	-1.07152	39.0085	39.3085	-0.299974
YDR152W	4	765143	62.9721	36.7359	765720	ARS423.2	10720	same	0.538462	leading	TFIID-dominated	ND	ND	ND	44.83	42.0342	2.79577	49.0488	51.759	-2.71022
YDR151C	4	765827	62.7063	36.5626	765270	ARS423.2	10270	opposite	0.538462	leading	TFIID-dominated	0.772123	0.451207	rest	44.3303	43.7585	0.571784	49.6608	47.8109	1.84987
YDR153C	4	768603	70.8599	37.4132	768060	ARS423.2	13060	opposite	0.538462	leading	TFIID-dominated	0.98273	0.830232	rest	43.8034	43.5538	0.249624	54.9444	54.6967	0.247746
YDR156W	4	769022	70.57	37.8092	769590	ARS423.2	14590	same	0.538462	leading	TFIID-dominated	ND	ND	ND	42.8386	44.7408	-1.90224	49.4786	49.2085	0.270118
YDR154C	4	769250	69.9835	37.5363	768720	ARS423.2	13720	opposite	0.538462	leading	ND	ND	ND	ND	43.3912	44.4246	-1.03334	54.8587	54.8556	0.00307308
YDR157W	4	769428	69.9835	37.9693	770010	ARS423.2	15010	same	0.538462	leading	TFIID-dominated	ND	ND	ND	42.5778	45.8504	-3.27263	48.5495	48.382	0.167507
YDR155C	4	769497	69.9835	37.6665	768960	ARS423.2	13960	opposite	0.538462	leading	SAGA-dominated	1.47037	-0.338736	rest	43.3907	44.352	-0.961308	54.7667	54.6441	0.122627
YDR158W	4	769839	69.6913	37.9693	770400	ARS423.2	15400	same	0.538462	leading	TFIID-dominated	1.17996	1.43157	rest	43.0454	49.174	-6.12865	51.7166	51.886	-0.169311
YDR159W	4	771271	72.2644	38.5917	771840	ARS423.2	16840	same	0.538462	leading	TFIID-dominated	-0.241806	0.029425	rest	45.7218	48.9972	-3.27545	57.5068	53.419	4.08773
YDR160W	4	775487	72.4463	41.5581	776070	ARS423.2	21070	same	0.538462	leading	TFIID-dominated	-0.322419	-0.252502	rest	49.6444	48.6447	0.999676	49.811	50.6405	-0.829478
YDR161W	4	778495	71.6353	43.0237	779070	ARS423.2	24070	same	0.538462	leading	TFIID-dominated	0.362873	0.440357	rest	50.7445	51.5791	-0.83454	52.4586	57.3478	-4.88919
YDR163W	4	780855	68.5453	43.1104	781440	ARS425.0	-25160	opposite	0.6	lagging	TFIID-dominated	ND	ND	ND	48.2485	52.152	-3.90352	58.0852	56.4663	1.61896
YDR162C	4	781731	69.3476	43.1104	781200	ARS425.0	-25400	same	0.6	lagging	TFIID-dominated	-0.266127	0.164235	rest	49.8688	50.4018	-0.532956	51.4134	53.1306	-1.71718
YDR165W	4	784335	70.7266	41.4289	784920	ARS425.0	-21680	opposite	0.6	lagging	TFIID-dominated	ND	ND	ND	46.1308	48.3946	-2.26379	51.1939	49.6323	1.56162
YDR164C	4	784763	69.5648	41.771	784230	ARS425.0	-22370	same	0.6	lagging	TFIID-dominated	-0.197752	-0.0801157	rest	48.548	47.3063	1.24169	54.6543	54.9843	-0.330055
YDR167W	4	788911	63.9272	38.8967	789480	ARS425.0	-17120	opposite	0.6	lagging	TFIID-dominated	ND	ND	ND	46.8953	42.972	3.92332	43.1599	49.7395	-6.57959
YDR166C	4	789779	60.4246	38.8967	789240	ARS425.0	-17360	same	0.6	lagging	TFIID-dominated	0.0238346	-0.073503	rest	45.2854	44.8063	0.479047	50.0226	51.1155	-1.09297
YDR168W	4	789791	60.4246	38.7279	790380	ARS425.0	-16220	opposite	0.6	lagging	TFIID-dominated	0.0721731	0.115957	rest	42.6172	42.6298	-0.0125885	42.8549	50.2589	-7.40404
YDR169C	4	794755	49.7978	39.1063	794220	ARS425.0	-12380	same	0.6	lagging	TFIID-dominated	-0.650877	0.184822	rest	45.0804	44.3238	0.756597	51.4497	52.4003	-0.950591
YDR169C-A	4	795220	49.4157	39.2001	794670	ARS425.0	-11930	same	0.6	lagging	ND	-0.296627	0.126904	ND	45.1967	42.4092	2.78759	46.8444	42.6925	4.15184
YDR170C	4	802931	48.1088	39.2396	802380	ARS425.0	-4220	same	0.6	lagging	TFIID-dominated	-0.298981	0.348736	rest	41.651	40.3875	1.26358	43.9616	43.2233	0.738282
YDR171W	4	806055	43.5265	38.7818	806640	ARS425.0	40	same	0.727273	leading	SAGA-dominated	-0.69546	-0.329205	rest	41.5932	40.9413	0.651837	44.7564	48.2441	-3.48768
YDR172W	4	807759	46.9701	38.8594	808320	ARS425.0	1720	same	0.727273	leading	TFIID-dominated	0.562318	1.15501	rest	37.4305	37.4442	-0.0137164	35.5051	41.2755	-5.77041
YDR174W	4	811583	49.2942	39.1858	812160	ARS425.0	5560	same	0.727273	leading	TFIID-dominated	ND	ND	ND	40.8485	43.3243	-2.47579	42.8272	43.1528	-0.325648
YDR173C	4	812171	50.0412	39.155	811620	ARS425.0	5020	opposite	0.727273	leading	TFIID-dominated	0.35829	0.208525	rest	41.2731	42.4022	-1.12907	40.5335	48.5371	-8.00356
YDR176W	4	813903	51.7392	39.2282	814470	ARS425.0	7870	same	0.727273	leading	TFIID-dominated	ND	ND	ND	44.2823	44.6002	-0.317969	51.8624	48.6149	3.24749
YDR175C	4	814699	53.2217	39.2282	814140	ARS425.0	7540	opposite	0.727273	leading	TFIID-dominated	0.387073	0.314429	rest	40.5489	43.5759	-3.02698	52.1494	48.921	3.22839
YDR177W	4	816263	60.2676	39.0643	816840	ARS425.0	10240	same	0.727273	leading	TFIID-dominated	ND	ND	ND	43.6554	43.6524	0.00300988	47.9517	46.8721	1.07961
YDR178W	4	817335	59.7101	38.9563	817920	ARS425.0	11320	same	0.727273	leading	TFIID-dominated	-0.13196	0.365068	rest	45.2247	44.0873	1.13732	47.7398	50.5378	-2.79801
YDR179W-A	4	818831	60.4819	38.8197	819420	ARS425.0	12820	same	0.727273	leading	TFIID-dominated	ND	ND	ND	47.7314	43.968	3.76339	50.6767	50.2675	0.409201
YDR179C	4	819723	61.8864	38.8197	819180	ARS425.0	12580	opposite	0.727273	leading	TFIID-dominated	-0.166294	-0.575566	rest	49.2582	42.6291	6.62912	46.9178	48.0488	-1.13105
YDR180W	4	820656	62.6033	38.8166	821220	ARS425.0	14620	same	0.727273	leading	TFIID-dominated	-0.145627	-0.220988	rest	45.6264	46.9601	-1.33373	50.9033	50.8016	0.101712
YDR182W	4	827079	72.7665	40.1761	827640	ARS426.5.0	-17360	opposite	ND	lagging	TFIID-dominated	ND	ND	ND	51.9894	48.0773	3.91211	50.5119	53.4253	-2.91349
YDR181C	4	827900	74.6224	40.0447	827370	ARS426.5.0	-17630	same	ND	lagging	TFIID-dominated	-0.68496	-0.220215	rest	49.1433	46.311	2.83227	54.8966	57.3657	-2.46905
YDR182W-A	4	828648	75.7508	40.5873	829230	ARS426.5.0	-15770	opposite	ND	lagging	ND	ND	ND	ND	49.9292	49.9521	-0.0229091	52.8716	55.2423	-2.37075
YDR183W	4	829088	75.598	40.7314	829650	ARS426.5.0	-15350	opposite	ND	lagging	TFIID-dominated	-0.12546	0.034553	rest	49.2882	48.2188	1.06937	51.9463	55.4958	-3.54954
YDR183C-A	4	831151	73.0996	41.0318	830610	ARS426.5.0	-14390	same	ND	lagging	ND	ND	ND	ND	47.5998	45.4702	2.12961	51.9212	55.2648	-3.34368
YDR184C	4	832010	72.7978	41.3501	831480	ARS426.5.0	-13520	same	ND	lagging	TFIID-dominated	0.307173	0.208717	rest	47.8104	46.1181	1.69235	53.8318	56.5361	-2.7043
YDR185C	4	833076	72.7878	41.691	832530	ARS426.5.0	-12470	same	ND	lagging	TFIID-dominated	0.774706	0.150139	rest	47.9647	52.3532	-4.3885	53.9991	63.4937	-9.49455
YDR188W	4	835864	76.5757	43.2124	836430	ARS426.5.0	-8570	opposite	ND	lagging	TFIID-dominated	ND	ND	ND	50.1621	48.9137	1.2484	55.5978	60.5393	-4.94151
YDR186C	4	836084	76.3964	42.9556	835530	ARS426.5.0	-9470	same	ND	lagging	TFIID-dominated	0.0264148	0.981642	rest	47.6238	48.5083	-0.884481	55.8478	61.927	-6.07914
YDR187C	4	837243	73.4664	43.4811	836700	ARS426.5.0	-8300	same	ND	lagging	TFIID-dominated	ND	ND	ND	45.3659	46.2787	-0.912741	50.6969	61.3964	-10.6995
YDR189W	4	837840	72.172	44.3317	838410	ARS426.5.0	-6590	opposite	ND	lagging	TFIID-dominated	0.170151	0.596882	rest	50.9412	49.3813	1.55989	57.4062	55.1861	2.22009
YDR191W	4	841800	67.7941	46.2558	842370	ARS426.5.0	-2630	opposite	ND	lagging	TFIID-dominated	ND	ND	ND	45.1307	48.9864	-3.85569	54.6632	54.3381	0.325116
YDR190C	4	842556	73.6189	46.2558	842010	ARS426.5.0	-2990	same	ND	lagging	TFIID-dominated	0.587456	0.98939	M	49.0971	47.6254	1.47177	56.2061	58.6732	-2.46715
YDR193W	4	844051	75.9551	46.6277	844620	ARS426.5.0	-380	opposite	ND	lagging	TFIID-dominated	ND	ND	ND	49.0911	52.1031	-3.01204	60.2446	60.2847	-0.040112
YDR194W-A	4	847568	70.0153	45.2439	848130	ARS426.5.0	3130	same	ND	leading	ND	ND	ND	ND	45.642	49.6279	-3.9859	53.7818	54.9768	-1.19493
YDR194C	4	848476	68.7623	45.2439	847920	ARS426.5.0	2920	opposite	ND	leading	TFIID-dominated	ND	ND	ND	45.3256	46.1784	-0.85278	53.4151	49.9366	3.47851
YDR195W	4	847848	69.6685	45.2439	848430	ARS426.5.0	3430	same	ND	leading	TFIID-dominated	0.539802	0.396423	rest	48.1242	49.1097	-0.985587	57.6475	57.3847	0.262878
YDR197W	4	850680	69.429	42.3713	851250	ARS426.5.0	6250	same	ND	leading	TFIID-dominated	ND	ND	ND	50.1049	49.7237	0.381259	58.4419	58.7023	-0.260416
YDR196C	4	851540	69.4131	42.3713	851010	ARS426.5.0	6010	opposite	ND	leading	TFIID-dominated	-0.140294	-0.305803	rest	47.3076	48.0392	-0.731598	56.9083	56.4733	0.435031
YDR199W	4	853672	60.239	38.9501	854250	ARS426.5.0	9250	same	ND	leading	TFIID-dominated	ND	ND	ND	47.468	45.0208	2.44717	56.8878	56.1234	0.764342
YDR198C	4	854508	59.692	38.9501	853950	ARS426.5.0	8950	opposite	ND	leading	TFIID-dominated	-0.129198	-0.41266	rest	45.0449	46.8969	-1.85197	53.3677	57.6387	-4.27097
YDR201W	4	855784	57.0423	36.7537	856350	ARS426.5.1	-11050	opposite	0	lagging	TFIID-dominated	ND	ND	ND	45.404	44.8375	0.566453	52.2244	57.7508	-5.52639
YDR200C	4	856668	56.4759	36.7537	856110	ARS426.5.0	11110	opposite	ND	leading	TFIID-dominated	-0.617027	-0.206137	rest	45.5073	45.2058	0.301475	59.2763	56.3787	2.89768
YDR203W	4	857179	56.4993	35.2441	857760	ARS426.5.1	-9640	opposite	0	lagging	TFIID-dominated	ND	ND	ND	47.7627	47.567	0.195707	55.8639	47.2721	8.59178
YDR204W	4	857592	56.6632	34.7748	858180	ARS426.5.1	-9220	opposite	0	lagging	TFIID-dominated	ND	ND	ND	46.1937	46.1859	0.00773649	53.2218	53.4865	-0.264679
YDR205W	4	858816	58.9372	33.8956	859380	ARS426.5.1	-8020	opposite	0	lagging	TFIID-dominated	-0.164427	-0.183906	rest	44.0079	44.0569	-0.0489638	48.0502	47.7601	0.2901
YDR206W	4	861216	51.6688	32.1433	861780	ARS426.5.1	-5620	opposite	0	lagging	TFIID-dominated	0.231673	0.379307	rest	41.8125	40.0546	1.75783	46.7578	48.8669	-2.10904
YDR208W	4	867544	46.9866	32.2969	868110	ARS426.5.1	710	same	nd	leading	TFIID-dominated	ND	ND	ND	42.146	44.7531	-2.60719	44.8422	45.9161	-1.07392
YDR207C	4	868220	52.8407	32.0333	867690	ARS426.5.1	290	opposite	nd	leading	TFIID-dominated	-1.00585	-0.0746893	rest	41.0874	40.6655	0.421913	53.7221	49.2213	4.50079
YDR210W	4	870512	0	35.0632	871080	ARS426.5.1	3680	same	nd	leading	TFIID-dominated	0.618623	0.0580272	rest	0	0		0	0
YDR209C	4	871946	R	35.0632	871410	ARS426.5.1	4010	opposite	nd	leading	TFIID-dominated	ND	ND	ND	0	0		0	0
YDR211W	4	884160	43.3419	25.0445	884730	ARS427.5.0	-9470	opposite	0	lagging	TFIID-dominated	0.200561	0.0268773	rest	37.3518	41.6078	-4.256	39.7508	44.3769	-4.62609
YDR212W	4	886648	38.0577	24.2223	887220	ARS427.5.0	-6980	opposite	0	lagging	TFIID-dominated	0.439373	0.285076	rest	40.6433	39.0302	1.61312	45.9352	47.6822	-1.74702
YDR213W	4	889024	38.07	24.5904	889590	ARS427.5.0	-4610	opposite	0	lagging	TFIID-dominated	-0.405172	-0.092292	rest	38.8117	38.9831	-0.17139	40.8831	42.0286	-1.14546
YDR214W	4	892248	41.2475	24.3536	892830	ARS427.5.0	-1370	opposite	0	lagging	TFIID-dominated	0.41979	0.427306	rest	39.5716	38.2719	1.29972	36.3534	38.7474	-2.39398
YDR216W	4	894008	40.0191	23.4018	894570	ARS427.5.0	370	same	0.5	leading	TFIID-dominated	-0.607921	0.241301	rest	31.9856	35.5715	-3.58584	33.4385	37.8778	-4.43925
YDR215C	4	894998	40.096	23.4018	894450	ARS427.5.0	250	opposite	0.5	leading	ND	ND	ND	ND	37.4528	38.1089	-0.656084	34.9115	37.2185	-2.30701
YDR217C	4	904036	34.5823	14.9388	903480	ARS427.5.1	-4320	same	0.8	lagging	TFIID-dominated	-0.79721	-0.464663	rest	36.3387	29.9653	6.37334	35.8064	30.5186	5.28779
YDR218C	4	905548	32.4594	14.2325	905010	ARS427.5.1	-2790	same	0.8	lagging	TFIID-dominated	-0.601127	-0.838932	rest	30.1378	26.6021	3.53571	27.0827	26.63	0.452645
YDR221W	4	906816	33.4672	13.7481	907380	ARS427.5.1	-420	opposite	0.8	lagging	TFIID-dominated	ND	ND	ND	23.8078	23.9335	-0.125725	22.0347	23.4307	-1.39599
YDR219C	4	907348	34.4534	13.835	906810	ARS427.5.1	-990	same	0.8	lagging	TFIID-dominated	-0.0966983	-0.0611337	rest	27.5429	28.4441	-0.901226	27.6191	28.9948	-1.37578
YDR220C	4	907789	35.0149	13.7481	907230	ARS427.5.1	-570	same	0.8	lagging	ND	ND	ND	ND	26.0186	27.4558	-1.43723	31.3191	24.322	6.99707
YDR222W	4	909528	29.9356	13.3204	910110	ARS428.0	710	same	1	leading	SAGA-dominated	-0.0441269	-0.214659	rest	21.6477	19.9141	1.73358	20.0802	18.2208	1.85945
YDR223W	4	911136	28.97	13.0081	911700	ARS428.1	-900	opposite	0	lagging	TFIID-dominated	-0.25396	-0.599113	rest	11.8966	11.4435	0.453129	12.6801	9.04501	3.63508
YDR225W	4	914928	35.8367	12.1741	915510	ARS428.2	110	same	1	leading	TFIID-dominated	ND	ND	ND	24.4157	21.6686	2.74708	21.2236	20.6575	0.566146
YDR224C	4	915332	34.9444	12.2667	914790	ARS428.2	-610	same	nd	lagging	TFIID-dominated	2.04412	2.44311	S	20.4995	21.419	-0.919533	18.943	18.4094	0.533527
YDR226W	4	915920	34.5388	12.0593	916500	ARS428.3	-100	opposite	0	lagging	TFIID-dominated	1.10662	1.13546	rest	23.8839	27.92	-4.03612	24.3347	24.9864	-0.651745
YDR227W	4	916952	34.9834	12.0684	917520	ARS428.3	920	same	1	leading	TFIID-dominated	-0.626846	-0.249553	rest	28.3316	26.4361	1.8955	28.0591	25.7119	2.34721
YDR229W	4	924184	28.4077	17.0167	924750	ARS429.1	-3050	opposite	0.4	lagging	TFIID-dominated	ND	ND	ND	36.0972	33.7087	2.38848	39.7398	33.9305	5.80927
YDR228C	4	924396	28.4077	15.9468	923850	ARS429.1	-3950	same	0.4	lagging	TFIID-dominated	0.018262	-0.118571	rest	28.9657	28.4367	0.528987	29.8834	29.9929	-0.10947
YDR230W	4	925719	37.6875	18.7766	926280	ARS429.1	-1520	opposite	0.4	lagging	TFIID-dominated	ND	ND	ND	35.2674	32.408	2.85943	39.4352	34.4063	5.02887
YDR232W	4	926696	40.8802	20.0403	927270	ARS429.1	-530	opposite	0.4	lagging	TFIID-dominated	ND	ND	ND	33.8475	33.4866	0.360922	33.7275	34.492	-0.764452
YDR231C	4	927444	40.0545	19.4002	926910	ARS429.1	-890	same	0.4	lagging	TFIID-dominated	0.0408731	-0.350717	rest	35.1765	32.9151	2.26138	39.6182	36.0843	3.53389
YDR234W	4	930504	44.2034	25.5148	931080	ARS429.5.0	-2720	opposite	0	lagging	TFIID-dominated	ND	ND	ND	37.6421	38.6966	-1.05455	41.6907	43.6522	-1.96147
YDR233C	4	930916	45.6153	24.1242	930360	ARS429.1	2560	opposite	nd	leading	TFIID-dominated	1.44112	1.31089	rest	35.6063	39.2903	-3.68397	34.9657	34.9649	0.00087838
YDR235W	4	932984	44.396	28.7638	933570	ARS429.5.0	-230	opposite	0	lagging	TFIID-dominated	0.387873	-0.126804	rest	41.7026	39.3318	2.37075	41.5875	41.5035	0.0839876
YDR237W	4	935960	47.5161	31.273	936540	ARS429.5.1	740	same	0.5	leading	TFIID-dominated	ND	ND	ND	40.9754	43.6595	-2.68414	41.9352	43.3292	-1.39393
YDR236C	4	936420	48.1359	30.847	935880	ARS429.5.1	80	opposite	0.5	leading	TFIID-dominated	0.0221231	-0.0187793	rest	39.8161	42.3635	-2.54742	41.2148	44.4334	-3.21868
YDR238C	4	941356	57.2063	33.7297	940800	ARS429.5.2	-2600	same	ND	lagging	TFIID-dominated	0.160719	0.798547	rest	42.8301	41.5064	1.32371	47.1575	45.3697	1.78775
YDR239C	4	943964	64.2381	34.6469	943410	ARS429.5.2	10	opposite	ND	leading	TFIID-dominated	ND	ND	ND	41.6942	44.2026	-2.50841	48.2478	50.473	-2.22524
YDR241W	4	944647	61.9839	35.4747	945210	ARS429.5.2	1810	same	ND	leading	TFIID-dominated	ND	ND	ND	47.0966	47.9435	-0.846865	51.5906	54.0848	-2.4942
YDR240C	4	945684	62.6821	35.4747	945150	ARS429.5.2	1750	opposite	ND	leading	TFIID-dominated	0.0867898	-0.143641	rest	44.7847	46.3685	-1.58372	49.5536	49.2099	0.343762
YDR242W	4	946216	R	36.2427	946800	ARS429.5.2	3400	same	ND	leading	SAGA/TFIID	ND	ND	ND	44.1825	44.4597	-0.277169	52.8943	50.0754	2.81894
YDR244W	4	950048	70.7728	38.9417	950610	ARS429.5.3	-5190	opposite	0.166667	lagging	TFIID-dominated	ND	ND	ND	46.8521	46.2666	0.58544	49.551	53.7686	-4.21756
YDR243C	4	950828	70.7822	38.5769	950280	ARS429.5.3	-5520	same	0.166667	lagging	TFIID-dominated	-0.238413	0.238012	rest	45.8187	44.7756	1.04309	54.0756	53.5618	0.51384
YDR245W	4	952216	68.9976	40.3429	952800	ARS429.5.3	-3000	opposite	0.166667	lagging	TFIID-dominated	0.556173	0.949742	rest	49.2826	45.3232	3.95942	62.0267	57.9685	4.05823
YDR246W	4	953768	72.0943	41.2564	954330	ARS429.5.3	-1470	opposite	0.166667	lagging	TFIID-dominated	ND	ND	ND	49.7009	48.1195	1.58141	54.0777	57.2643	-3.18663
YDR246W-A	4	954629	74.2791	41.7777	955200	ARS429.5.3	-600	opposite	0.166667	lagging	ND	0.21854	-0.445326	ND	50.6806	50.3814	0.29917	59.0224	59.5275	-0.505055
YDR247W	4	955160	74.8188	42.0115	955740	ARS429.5.3	-60	opposite	0.166667	lagging	SAGA-dominated	0.00557311	-0.111534	S	51.3305	52.807	-1.47648	55.1311	58.7214	-3.59034
YDR248C	4	958932	77.8132	42.9495	958380	ARS429.5.3	2580	opposite	0.214286	leading	TFIID-dominated	0.00512311	-0.362548	rest	52.6442	49.7597	2.88442	60.377	57.0046	3.37242
YDR251W	4	959808	78.0968	43.4994	960390	ARS429.5.3	4590	same	0.214286	leading	TFIID-dominated	ND	ND	ND	47.5378	51.6686	-4.13083	52.4442	56.478	-4.03383
YDR249C	4	960298	78.7622	43.3746	959760	ARS429.5.3	3960	opposite	0.214286	leading	TFIID-dominated	0.170373	-0.109503	rest	53.0903	48.8511	4.23925	53.2129	59.063	-5.85008
YDR250C	4	960857	81.3233	43.4994	960300	ARS429.5.3	4500	opposite	0.214286	leading	ND	ND	ND	ND	47.8862	49.431	-1.54477	52.8871	60.2131	-7.32593
YDR252W	4	962904	85.009	44.0586	963480	ARS429.5.3	7680	same	0.214286	leading	TFIID-dominated	0.650623	-0.0491618	rest	39.5973	47.5778	-7.98052	57.3079	61.9606	-4.6527
YDR254W	4	964536	84.1336	44.1889	965100	ARS429.5.3	9300	same	0.214286	leading	TFIID-dominated	ND	ND	ND	51.2939	48.0635	3.23044	54.2809	60.1058	-5.82488
YDR253C	4	965300	85.1827	44.1774	964770	ARS429.5.3	8970	opposite	0.214286	leading	TFIID-dominated	0.0251231	-0.44283	rest	38.3561	46.986	-8.62991	57.1157	62.2652	-5.14949
YDR255C	4	968364	87.7289	44.0615	967830	ARS429.5.3	12030	opposite	0.214286	leading	SAGA-dominated	ND	ND	ND	50.0703	50.5907	-0.520381	59.3065	65.5169	-6.21047
YDR256C	4	970172	79.8355	43.8301	969630	ARS429.5.3	13830	opposite	0.214286	leading	TFIID-dominated	0.424623	0.481212	rest	53.1269	51.8314	1.29548	54.2939	61.7907	-7.49682
YDR257C	4	971988	80.7773	43.6633	971430	ARS429.5.3	15630	opposite	0.214286	leading	TFIID-dominated	0.254998	0.370253	rest	54.3331	51.7758	2.5573	55.3557	62.5071	-7.15145
YDR258C	4	974804	73.2263	43.6485	974250	ARS429.5.3	18450	opposite	0.214286	leading	SAGA-dominated	-0.2769	0.428404	rest	55.2529	50.5976	4.65525	55.1873	57.5521	-2.3648
YDR259C	4	976492	74.3108	44.2012	975960	ARS429.5.3	20160	opposite	0.214286	leading	TFIID-dominated	-0.484627	-0.983722	rest	47.2701	48.6197	-1.34961	61.4435	56.6447	4.79881
YDR260C	4	977772	80.6272	44.7675	977220	ARS429.5.3	21420	opposite	0.214286	leading	TFIID-dominated	0.152373	0.128839	rest	48.1027	51.3472	-3.24451	57.912	55.9806	1.93139
YDR261C	4	979780	0	46.7197	979230	ARS429.5.3	23430	opposite	0.214286	leading	SAGA/TFIID	0.0608731	0.157775	S	47.4347	50.9248	-3.49009	56.4494	57.4398	-0.990401
YDR262W	4	992616	51.334	42.479	993180	ARS430.0	-19020	opposite	0.5	lagging	TFIID-dominated	0.608998	0.373135	rest	45.3032	43.5147	1.78854	48.5826	50.7624	-2.17979
YDR265W	4	998136	48.2408	36.0928	998700	ARS430.0	-13500	opposite	0.5	lagging	TFIID-dominated	ND	ND	ND	42.7387	41.1811	1.55756	45.4828	45.1708	0.311973
YDR264C	4	998940	46.6097	36.6046	998400	ARS430.0	-13800	same	0.5	lagging	TFIID-dominated	0.1186	0.788423	rest	42.3565	42.1497	0.206754	45.1057	45.8518	-0.746028
YDR266C	4	1002732	36.7487	32.4372	1002180	ARS430.0	-10020	same	0.5	lagging	TFIID-dominated	0.343873	0.220623	rest	37.5702	38.8389	-1.26875	46.0923	43.3265	2.76576
YDR268W	4	1003456	36.2067	30.9464	1004040	ARS430.0	-8160	opposite	0.5	lagging	TFIID-dominated	ND	ND	ND	38.9183	39.0963	-0.178061	42.2909	44.1744	-1.88353
YDR267C	4	1004052	36.1387	30.9464	1003500	ARS430.0	-8700	same	0.5	lagging	TFIID-dominated	-0.615627	0.0883046	rest	37.2618	39.6385	-2.3767	42.2798	40.8024	1.47742
YDR270W	4	1005080	36.0623	29.2252	1005660	ARS430.0	-6540	opposite	0.5	lagging	TFIID-dominated	-0.348055	0.0188369	rest	35.5796	36.6849	-1.10531	34.7295	33.433	1.29652
YDR269C	4	1006484	37.2693	29.2252	1005930	ARS430.0	-6270	same	0.5	lagging	TFIID-dominated	ND	ND	ND	36.476	38.6997	-2.22368	41.3436	33.433	7.9106
YDR272W	4	1008448	32.3827	27.3367	1009020	ARS430.0	-3180	opposite	0.5	lagging	TFIID-dominated	0.00353978	-0.39513	rest	33.5962	29.9892	3.60702	34.9358	32.1226	2.81319
YDR271C	4	1009262	32.9179	27.3367	1008720	ARS430.0	-3480	same	0.5	lagging	TFIID-dominated	ND	ND	ND	30.3086	30.1671	0.141468	33.3245	31.724	1.60049
YDR273W	4	1009400	32.9179	26.8568	1009980	ARS430.0	-2220	opposite	0.5	lagging	TFIID-dominated	-0.646913	-0.762145	rest	36.9346	36.2242	0.710429	37.9764	36.9743	1.00204
YDR274C	4	1012456	33.0251	26.0629	1011900	ARS430.0	-300	same	0.5	lagging	SAGA/TFIID	ND	ND	ND	32.4899	31.7886	0.701336	28.0689	31.0806	-3.01176
YDR276C	4	1014244	35.5232	25.4884	1013700	ARS430.1	-500	same	1	lagging	SAGA-dominated	0.742123	0.900766	M	28.8892	29.1408	-0.251575	29.4275	28.5795	0.848006
YDR277C	4	1016380	37.1133	25.1073	1015830	ARS430.2	-370	same	1	lagging	SAGA-dominated	-0.562413	0.0137171	rest	23.3757	25.2698	-1.8941	24.3507	24.3299	0.0207601
YDR278C	4	1017814	37.368	24.8811	1017270	ARS430.2	1070	opposite	0.666667	leading	TFIID-dominated	ND	ND	ND	28.531	27.3078	1.22319	24.4683	23.6793	0.78894
YDR279W	4	1018736	38.2355	24.5888	1019310	ARS430.2	3110	same	0.666667	leading	TFIID-dominated	-0.116877	-0.246755	G1	32.2468	35.1712	-2.92442	33.0898	38.8369	-5.74711
YDR280W	4	1020112	39.8121	24.3968	1020690	ARS430.2	4490	same	0.666667	leading	TFIID-dominated	0.62104	0.296513	rest	32.1104	33.5368	-1.42636	30.2374	33.6609	-3.42355
YDR281C	4	1022924	34.1675	24.2749	1022370	ARS430.5.0	-4630	same	1	lagging	SAGA/TFIID	0.371873	-0.40864	rest	36.9205	33.7829	3.13753	37.9051	30.7158	7.18936
YDR282C	4	1025260	38.7925	24.3447	1024710	ARS430.5.0	-2290	same	1	lagging	TFIID-dominated	-0.744427	-0.811618	rest	31.8696	31.0737	0.795897	42.0667	31.8284	10.2383
YDR283C	4	1030780	45.1935	27.3202	1030230	ARS430.5.1	430	opposite	ND	leading	TFIID-dominated	-0.352627	-0.306504	rest	35.4942	36.0394	-0.545252	33.6338	37.9917	-4.35787
YDR284C	4	1032228	46.828	28.7755	1031670	ARS430.5.2	-130	same	ND	lagging	TFIID-dominated	0.236206	0.0123952	rest	39.3486	39.8527	-0.504121	43.2217	37.2584	5.96336
YDR285W	4	1032888	46.0971	30.1609	1033470	ARS430.5.3	70	same	0.8	leading	TFIID-dominated	ND	ND	ND	42.4532	41.8501	0.603083	47.1753	45.6048	1.57049
YDR287W	4	1035272	47.3384	31.9894	1035840	ARS430.5.3	2440	same	0.8	leading	TFIID-dominated	ND	ND	ND	41.8583	41.2789	0.57939	45.2315	42.5952	2.63633
YDR286C	4	1036084	50.0579	31.9894	1035540	ARS430.5.3	2140	opposite	0.8	leading	TFIID-dominated	-0.749127	-0.748407	rest	44.1298	41.1242	3.00555	47.254	43.7399	3.51416
YDR288W	4	1036640	50.4123	32.8303	1037220	ARS430.5.3	3820	same	0.8	leading	TFIID-dominated	0.187373	0.139654	rest	42.0749	44.8827	-2.80781	47.9149	48.3851	-0.470232
YDR290W	4	1038866	46.8064	33.7996	1039440	ARS430.5.3	6040	same	0.8	leading	TFIID-dominated	ND	ND	ND	40.5851	41.1553	-0.570138	41.4779	43.5182	-2.0403
YDR291W	4	1039216	46.5459	34.0272	1039800	ARS430.5.4	-6000	opposite	0	lagging	TFIID-dominated	ND	ND	ND	43.07	41.2845	1.78552	44.6646	44.4986	0.166062
YDR289C	4	1040108	46.0534	34.0272	1039560	ARS430.5.3	6160	opposite	0.8	leading	TFIID-dominated	ND	ND	ND	40.4977	40.3386	0.159141	43.6597	46.9206	-3.26093
YDR292C	4	1045660	43.561	36.3298	1045110	ARS430.5.4	-690	same	0	lagging	TFIID-dominated	-0.00697689	0.51282	rest	41.6017	42.2533	-0.651631	45.2376	45.7408	-0.503188
YDR293C	4	1050740	38.203	36.6102	1050210	ARS430.5.4	4410	opposite	nd	leading	TFIID-dominated	0.179347	0.39392	rest	40.0617	39.1044	0.957372	42.2419	45.8167	-3.57482
YDR294C	4	1052788	33.5401	35.829	1052250	ARS431.0	-4350	same	0.5	lagging	TFIID-dominated	ND	ND	ND	34.9689	37.119	-2.15015	38.965	34.3109	4.65408
YDR296W	4	1054648	36.3429	34.278	1055220	ARS431.0	-1380	opposite	0.5	lagging	TFIID-dominated	ND	ND	ND	37.8674	33.0529	4.81444	37.0216	35.1	1.92157
YDR295C	4	1055404	37.2282	34.5355	1054860	ARS431.0	-1740	same	0.5	lagging	TFIID-dominated	-0.0802769	-0.400223	rest	34.9775	32.5764	2.40107	35.4209	30.8251	4.59572
YDR297W	4	1055896	37.2358	33.7949	1056480	ARS431.0	-120	opposite	0.5	lagging	SAGA-dominated	0.0558731	0.543792	G1	30.4579	28.0077	2.45022	29.4265	26.0347	3.39178
YDR299W	4	1059072	38.347	32.7153	1059660	ARS431.2	-540	opposite	0	lagging	TFIID-dominated	ND	ND	ND	35.7104	35.6923	0.0181489	38.3248	34.638	3.68674
YDR298C	4	1059492	37.655	32.903	1058940	ARS431.1	-60	same	1	lagging	TFIID-dominated	0.0237731	0.797382	rest	33.16	34.4365	-1.27649	34.9504	32.7364	2.21402
YDR301W	4	1062776	40.9441	32.9227	1063350	ARS431.2	3150	same	nd	leading	TFIID-dominated	ND	ND	ND	37.9652	38.7032	-0.737936	42.7409	41.2254	1.51546
YDR300C	4	1063364	42.0741	32.8138	1062810	ARS431.2	2610	opposite	nd	leading	TFIID-dominated	0.129573	0.104052	rest	34.9747	37.2358	-2.26114	34.3787	37.921	-3.54228
YDR302W	4	1067168	49.6132	34.6192	1067730	ARS431.2	7530	same	nd	leading	TFIID-dominated	-0.211627	-0.1888	G2	38.3291	39.8944	-1.56529	43.5617	45.3195	-1.75781
YDR303C	4	1072188	54.2706	36.0547	1071630	ARS431.2	11430	opposite	nd	leading	TFIID-dominated	0.362773	-0.0389685	rest	40.3245	41.8662	-1.54167	45.9385	43.3912	2.54726
YDR304C	4	1073100	54.9244	36.402	1072560	ARS431.2	12360	opposite	nd	leading	TFIID-dominated	0.10204	0.33413	rest	41.5697	46.9308	-5.36113	47.4844	45.186	2.29842
YDR305C	4	1073980	55.2951	36.5962	1073430	ARS431.2	13230	opposite	nd	leading	TFIID-dominated	ND	ND	ND	40.5675	46.7482	-6.18068	44.4338	44.3131	0.120757
YDR307W	4	1075312	60.4684	37.8962	1075890	ARS431.2	15690	same	nd	leading	TFIID-dominated	ND	ND	ND	43.0737	43.8502	-0.776574	50.1727	52.1245	-1.95179
YDR306C	4	1075716	61.6346	37.5881	1075170	ARS431.2	14970	opposite	nd	leading	TFIID-dominated	-0.206252	-0.248634	rest	44.2312	43.363	0.868186	48.6599	47.6478	1.01202
YDR308C	4	1078996	59.6638	39.7149	1078440	ARS431.2	18240	opposite	nd	leading	TFIID-dominated	1.23487	0.272305	rest	46.8805	43.4513	3.42914	54.5016	52.9014	1.60017
YDR309C	4	1080764	64.3031	41.2827	1080210	ARS431.2	20010	opposite	nd	leading	SAGA-dominated	0.517998	1.03316	G1	44.9472	43.4176	1.5296	58.3221	57.5625	0.759625
YDR311W	4	1084560	68.3828	43.7902	1085130	ARS431.5.0	-17470	opposite	ND	lagging	TFIID-dominated	ND	ND	ND	48.134	44.2521	3.8819	57.8403	58.8452	-1.00495
YDR310C	4	1085100	69.6258	43.7145	1084560	ARS431.5.0	-18040	same	ND	lagging	ND	-0.00534118	0.392958	rest	46.0259	47.5475	-1.52161	52.5426	55.1217	-2.5791
YDR312W	4	1087040	67.8315	43.4387	1087620	ARS431.5.0	-14980	opposite	ND	lagging	TFIID-dominated	-0.136377	0.186787	rest	48.361	48.299	0.0619764	55.5121	55.5649	-0.0527411
YDR314C	4	1093052	86.171	40.5805	1092510	ARS431.5.0	-10090	same	ND	lagging	TFIID-dominated	-0.130092	-0.162142	rest	48.5302	46.6275	1.90275	49.5846	48.7959	0.788683
YDR316W	4	1093232	96.1626	39.9558	1093800	ARS431.5.0	-8800	opposite	ND	lagging	TFIID-dominated	ND	ND	ND	49.3298	49.0132	0.316648	53.5231	56.1181	-2.595
YDR315C	4	1094092	0	39.9558	1093560	ARS431.5.0	-9040	same	ND	lagging	TFIID-dominated	-0.0395019	-0.42952	rest	49.5342	46.2234	3.31077	54.2287	57.013	-2.78432
YDR317W	4	1101632	51.3845	36.8332	1102200	ARS431.5.0	-400	opposite	ND	lagging	ND	-0.181127	-0.51833	rest	43.1424	42.1479	0.994458	41.5964	44.6218	-3.02542
YDR318W	4	1103152	49.3132	36.4693	1103730	ARS431.5.0	1130	same	ND	leading	TFIID-dominated	0.149673	0.407529	rest	42.2544	41.7251	0.529239	37.8579	44.2861	-6.42812
YDR319C	4	1106428	42.7525	36.1025	1105890	ARS431.5.1	-2710	same	0.5	lagging	TFIID-dominated	0.575473	-0.0750121	rest	39.8401	38.67	1.17016	41.4817	34.9356	6.54611
YDR320W-B	4	1107981	45.2586	35.8744	1108560	ARS431.5.1	-40	opposite	0.5	lagging	ND	ND	ND	ND	34.4604	34.7317	-0.271297	31.9824	28.9546	3.02788
YDR321W	4	1108160	45.7304	35.8688	1108740	ARS431.5.1	140	same	1	leading	TFIID-dominated	ND	ND	ND	34.4898	34.4564	0.0334731	29.0795	30.6679	-1.58839
YDR320C-A	4	1109028	47.0536	35.8744	1108470	ARS431.5.1	-130	same	0.5	lagging	ND	ND	ND	ND	37.0213	37.3251	-0.303832	36.5427	33.8851	2.65755
YDR322W	4	1110072	48.1678	36.0432	1110660	ARS431.5.2	-1140	opposite	0	lagging	TFIID-dominated	-0.105877	0.0025597	rest	39.8082	40.623	-0.814816	47.2541	43.3132	3.94095
YDR323C	4	1114556	53.4965	37.1448	1114020	ARS431.5.3	1020	opposite	ND	leading	TFIID-dominated	-0.174377	-0.0984428	rest	39.1489	39.3495	-0.200695	38.674	41.929	-3.25507
YDR325W	4	1116608	57.7797	38.3159	1117170	ARS431.5.4	170	same	ND	leading	TFIID-dominated	ND	ND	ND	43.0335	44.5429	-1.50941	46.4603	44.3816	2.07868
YDR324C	4	1117228	61.4836	38.1401	1116690	ARS431.5.4	-310	same	ND	lagging	TFIID-dominated	0.294818	0.511419	rest	42.8635	41.4914	1.37215	44.9444	43.6475	1.29685
YDR327W	4	1124797	56.3548	38.8003	1125360	ARS431.5.4	8360	same	ND	leading	TFIID-dominated	ND	ND	ND	46.1316	44.2553	1.8763	54.0408	54.8146	-0.773885
YDR326C	4	1125612	54.6006	38.8003	1125060	ARS431.5.4	8060	opposite	ND	leading	TFIID-dominated	0.137926	0.28331	rest	45.3091	44.2884	1.02076	48.1999	49.5608	-1.3609
YDR328C	4	1126580	54.3947	38.5541	1126050	ARS431.5.4	9050	opposite	ND	leading	TFIID-dominated	0.336873	0.274439	rest	45.6682	44.6652	1.00299	53.6808	54.5781	-0.897275
YDR330W	4	1127304	55.0634	38.0747	1127880	ARS431.5.4	10880	same	ND	leading	SAGA-dominated	ND	ND	ND	45.0407	45.0824	-0.0416865	52.181	50.6837	1.49726
YDR329C	4	1128124	55.7841	38.0747	1127580	ARS431.5.4	10580	opposite	ND	leading	ND	-0.474827	-0.0486372	rest	46.8247	45.9801	0.844555	54.3322	54.5837	-0.251522
YDR331W	4	1128968	55.7827	37.4305	1129530	ARS431.7.0	-11470	opposite	0.2	lagging	TFIID-dominated	ND	ND	ND	44.1393	44.5183	-0.378995	48.4288	49.2342	-0.805316
YDR332W	4	1130464	53.5032	36.5742	1131030	ARS431.7.0	-9970	opposite	0.2	lagging	TFIID-dominated	ND	ND	ND	45.7248	42.3901	3.33476	44.9084	45.5713	-0.662873
YDR334W	4	1135224	47.378	32.255	1135800	ARS431.7.0	-5200	opposite	0.2	lagging	TFIID-dominated	ND	ND	ND	42.8913	40.1876	2.7037	43.2781	43.2033	0.0748535
YDR333C	4	1135956	45.9597	32.7611	1135410	ARS431.7.0	-5590	same	0.2	lagging	TFIID-dominated	0.130095	0.452649	rest	42.8247	41.4154	1.40926	46.1935	46.9048	-0.711365
YDR335W	4	1140304	36.7743	26.8876	1140870	ARS431.7.0	-130	opposite	0.2	lagging	TFIID-dominated	-0.0605894	0.266238	rest	36.1461	34.7804	1.3657	37.4534	35.3926	2.0608
YDR336W	4	1144576	32.9868	22.4325	1145160	ARS431.7.1	960	same	0.666667	leading	TFIID-dominated	ND	ND	ND	34.5216	32.0346	2.48698	32.87	34.0096	-1.13962
YDR337W	4	1145768	33.7734	21.4998	1146330	ARS431.7.1	2130	same	0.666667	leading	TFIID-dominated	0.249373	-0.226222	M	34.5439	33.0968	1.44705	31.3333	33.1415	-1.80823
YDR338C	4	1150020	40.7903	18.8008	1149480	ARS431.7.1	5280	opposite	0.666667	leading	TFIID-dominated	-0.119377	-0.279534	rest	35.1495	36.9065	-1.75704	30.2471	33.5016	-3.25453
YDR340W	4	1150375	40.7903	17.5013	1150950	ARS432.0	-6050	opposite	0	lagging	SAGA-dominated	ND	ND	ND	28.9659	27.1534	1.81243	34.6304	27.499	7.1314
YDR339C	4	1151052	52.432	17.5013	1150500	ARS431.7.1	6300	opposite	0.666667	leading	TFIID-dominated	0.48204	0.104347	rest	31.1772	31.0771	0.100117	28.4784	34.6201	-6.14167
YDR341C	4	1154172	35.9938	15.1782	1153620	ARS432.0	-3380	same	0	lagging	TFIID-dominated	0.536328	0.389922	rest	29.113	26.7175	2.39548	26.2365	26.2298	0.00667234
YDR342C	4	1156422	52.0772	14.1662	1155870	ARS432.0	-1130	same	0	lagging	SAGA-dominated	-0.605327	-1.24315	M/G1	19.9426	22.4756	-2.53299	0	0
YDR343C	4	1161814	32.4679	13.0692	1161270	ARS432.2	-930	same	1	lagging	SAGA-dominated	0.157456	-1.11478	rest	23.7217	24.6993	-0.977591	22.2651	21.9744	0.290761
YDR344C	4	1162943	30.2285	12.8717	1162410	ARS432.2	210	opposite	0	leading	ND	ND	ND	ND	33.5735	28.2687	5.30479	23.7102	22.5783	1.13191
YDR345C	4	1165188	34.0018	12.6304	1164630	ARS432.5.0	430	opposite	0	leading	SAGA-dominated	0.0102367	1.31457	rest	20.2714	20.363	-0.0915466	19.4735	19.8649	-0.39144
YDR347W	4	1168568	30.6834	14.3184	1169130	ARS432.5.2	-670	opposite	0.5	lagging	TFIID-dominated	ND	ND	ND	27.9822	27.5875	0.394646	24.0071	23.8701	0.137045
YDR346C	4	1169356	30.4723	13.9672	1168800	ARS432.5.2	-1000	same	0.5	lagging	TFIID-dominated	0.418159	0.348158	G2	24.0161	22.3716	1.64444	21.4379	21.3018	0.136122
YDR348C	4	1172556	41.293	17.4076	1172010	ARS432.5.3	1010	opposite	0.470588	leading	ND	-0.087484	0.138224	rest	28.6875	33.9488	-5.26138	28.7079	26.7094	1.99847
YDR349C	4	1174772	39.0876	20.2912	1174230	ARS432.5.3	3230	opposite	0.470588	leading	ND	0.106186	-0.0518476	rest	28.5962	27.1514	1.44487	28.1158	26.2242	1.89167
YDR351W	4	1177936	41.5299	26.1038	1178520	ARS432.5.3	7520	same	0.470588	leading	TFIID-dominated	ND	ND	ND	34.2869	33.9638	0.323138	34.7842	36.3988	-1.61463
YDR350C	4	1178708	42.4168	26.1038	1178160	ARS432.5.3	7160	opposite	0.470588	leading	TFIID-dominated	-0.115044	-0.23087	rest	31.481	35.1789	-3.69793	28.61	34.8626	-6.25257
YDR352W	4	1181120	42.6954	29.1407	1181700	ARS432.5.3	10700	same	0.470588	leading	TFIID-dominated	0.394456	0.359556	rest	35.8004	36.5249	-0.724542	42.5585	42.88	-0.321474
YDR353W	4	1182728	44.7643	30.008	1183290	ARS432.5.3	12290	same	0.470588	leading	TFIID-dominated	0.697248	0.921392	G1	36.5416	37.4	-0.85842	40.0685	44.9588	-4.89023
YDR354W	4	1184128	55.2817	30.8607	1184700	ARS432.5.3	13700	same	0.470588	leading	TFIID-dominated	-0.0437269	0.641282	rest	43.4949	41.481	2.01388	51.2268	45.4887	5.73815
YDR354C-A	4	1185775	55.9944	31.1614	1185240	ARS432.5.3	14240	opposite	0.470588	leading	ND	ND	ND	ND	43.4379	41.5382	1.89969	51.6223	45.7489	5.87338
YDR355C	4	1186862	55.1638	31.7984	1186320	ARS432.5.3	15320	opposite	0.470588	leading	TFIID-dominated	ND	ND	ND	43.5477	43.1736	0.374096	53.5545	46.6729	6.88167
YDR358W	4	1189504	54.6796	34.3629	1190070	ARS432.5.3	19070	same	0.470588	leading	SAGA-dominated	ND	ND	ND	43.1024	45.6804	-2.57803	48.2313	51.0371	-2.80573
YDR357C	4	1190228	55.4797	34.3629	1189680	ARS432.5.3	18680	opposite	0.470588	leading	TFIID-dominated	0.655123	-0.405612	rest	41.0369	43.3535	-2.31667	42.1622	42.5573	-0.395094
YDR360W	4	1194091	61.272	38.2508	1194660	ARS432.5.3	23660	same	0.470588	leading	TFIID-dominated	ND	ND	ND	43.6894	45.8365	-2.14709	52.1688	51.5745	0.594213
YDR361C	4	1196796	65.5144	39.3633	1196250	ARS432.5.3	25250	opposite	0.470588	leading	TFIID-dominated	0.685998	0.0457718	rest	43.8828	45.5364	-1.65364	51.1554	50.7163	0.439122
YDR363W	4	1198480	72.9848	41.0307	1199070	ARS432.5.3	28070	same	0.470588	leading	TFIID-dominated	ND	ND	ND	45.7955	50.8285	-5.03301	57.6834	53.7087	3.97474
YDR362C	4	1199292	71.2263	41.0307	1198740	ARS432.5.3	27740	opposite	0.470588	leading	TFIID-dominated	-0.237349	0.187079	rest	44.1866	47.4164	-3.22987	57.5867	56.7385	0.848246
YDR363W-A	4	1201592	69.8524	42.6387	1202160	ARS432.5.3	31160	same	0.470588	leading	ND	1.00612	-0.126307	ND	46.2558	50.8783	-4.62255	56.6753	53.6553	3.02001
YDR364C	4	1204724	0	43.0566	1204170	ARS432.5.3	33170	opposite	0.470588	leading	TFIID-dominated	0.434516	0.33432	rest	48.452	48.6252	-0.173193	54.0032	56.7053	-2.70217
YDR365C	4	1206940	R	43.1082	1206390	ARS433.0	-33410	same	0.5	lagging	TFIID-dominated	0.213016	0.483118	rest	46.3339	46.384	-0.0500678	57.5841	53.6274	3.95674
YDR367W	4	1212272	R	43.085	1212840	ARS433.0	-26960	opposite	0.5	lagging	TFIID-dominated	ND	ND	ND	50.4934	48.7126	1.78073	53.8222	56.2206	-2.39842
YDR366C	4	1213328	69.1734	43.085	1212780	ARS433.0	-27020	same	0.5	lagging	SAGA-dominated	ND	ND	ND	50.8756	48.135	2.74057	52.1501	52.162	-0.0118826
YDR368W	4	1213336	69.1734	43.2421	1213920	ARS433.0	-25880	opposite	0.5	lagging	TFIID-dominated	0.212373	-0.173102	G1	49.885	47.3346	2.55038	58.2664	57.3178	0.948564
YDR369C	4	1218100	67.9576	44.0258	1217550	ARS433.0	-22250	same	0.5	lagging	TFIID-dominated	-0.516314	-0.558233	rest	49.934	47.1589	2.77507	51.7832	52.9127	-1.12946
YDR371W	4	1218840	66.4083	44.3081	1219410	ARS433.0	-20390	opposite	0.5	lagging	TFIID-dominated	ND	ND	ND	46.1799	49.7524	-3.57252	47.7625	49.0747	-1.31214
YDR370C	4	1219604	65.3145	44.3081	1219050	ARS433.0	-20750	same	0.5	lagging	TFIID-dominated	0.258473	0.27115	rest	45.5548	47.1428	-1.58804	51.4699	52.3529	-0.882922
YDR371C-A	4	1220105	65.1139	44.4021	1219560	ARS433.0	-20240	same	0.5	lagging	ND	ND	ND	ND	48.6038	51.2327	-2.62889	48.6739	50.2582	-1.58427
YDR373W	4	1222176	56.1479	45.0139	1222740	ARS433.0	-17060	opposite	0.5	lagging	TFIID-dominated	ND	ND	ND	43.071	43.2542	-0.183225	47.6913	50.6215	-2.93025
YDR372C	4	1222948	54.4984	44.9069	1222410	ARS433.0	-17390	same	0.5	lagging	TFIID-dominated	0.396973	0.322209	rest	42.7015	45.0599	-2.35835	47.7691	51.6785	-3.90946
YDR374W-A	4	1224232	56.0477	45.4105	1224810	ARS433.0	-14990	opposite	0.5	lagging	ND	ND	ND	ND	46.1828	45.1926	0.990202	49.9268	51.4009	-1.47413
YDR374C	4	1224886	56.3664	45.3212	1224330	ARS433.0	-15470	same	0.5	lagging	ND	-0.407698	-1.08384	rest	45.0654	43.4982	1.56714	46.9259	50.7377	-3.81177
YDR376W	4	1226240	53.5232	45.6177	1226820	ARS433.0	-12980	opposite	0.5	lagging	TFIID-dominated	ND	ND	ND	41.7039	42.2771	-0.573204	44.9644	46.4206	-1.45617
YDR377W	4	1228024	48.6967	45.5152	1228590	ARS433.0	-11210	opposite	0.5	lagging	TFIID-dominated	ND	ND	ND	43.9316	40.9911	2.94055	44.943	47.3701	-2.4271
YDR375C	4	1228716	48.7104	45.5152	1228170	ARS433.0	-11630	same	0.5	lagging	TFIID-dominated	-0.225027	-0.186287	rest	41.7204	42.6296	-0.909231	45.2993	46.4926	-1.19336
YDR379W	4	1229552	48.2156	45.0862	1230120	ARS433.0	-9680	opposite	0.5	lagging	TFIID-dominated	ND	ND	ND	45.0892	39.7411	5.34806	44.5525	45.9237	-1.37116
YDR378C	4	1230132	46.4887	45.0862	1229580	ARS433.0	-10220	same	0.5	lagging	TFIID-dominated	0.927373	0.335969	rest	45.1235	41.0913	4.03215	46.8071	48.8615	-2.05435
YDR380W	4	1233616	46.1952	41.7191	1234200	ARS433.0	-5600	opposite	0.5	lagging	SAGA-dominated	ND	ND	ND	37.5434	38.4676	-0.924229	40.4266	37.3401	3.08651
YDR379C-A	4	1234052	47.0528	42.1979	1233510	ARS433.0	-6290	same	0.5	lagging	ND	-0.120877	-1.15557	ND	41.8841	36.2109	5.67318	43.1817	41.3089	1.87275
YDR381W	4	1235944	46.2049	39.8231	1236510	ARS433.0	-3290	opposite	0.5	lagging	SAGA/TFIID	2.38071	1.82054	rest	35.2549	35.4589	-0.204011	37.5741	35.3357	2.23836
YDR382W	4	1238896	40.5819	37.6267	1239480	ARS433.0	-320	opposite	0.5	lagging	TFIID-dominated	ND	ND	ND	37.144	40.7169	-3.57296	37.001	32.6701	4.33091
YDR381C-A	4	1239620	49.5257	37.6267	1239090	ARS433.0	-710	same	0.5	lagging	ND	1.81737	0.265568	ND	34.0722	32.6246	1.44759	38.4448	31.7103	6.7345
YDR383C	4	1241180	75.7888	36.9955	1240650	ARS433.0	850	opposite	0	leading	TFIID-dominated	1.24997	0.482611	rest	40.4299	44.2814	-3.8515	37.9154	37.6826	0.232786
YDR385W	4	1242648	65.6174	36.7745	1243230	ARS433.1	630	same	1	leading	TFIID-dominated	ND	ND	ND	40.7655	39.4039	1.36156	0	0
YDR384C	4	1242628	65.6174	36.7321	1242090	ARS433.1	-510	same	nd	lagging	SAGA/TFIID	0.530456	1.00311	rest	43.0029	39.9968	3.00606	44.9826	35.1934	9.7892
YDR386W	4	1245568	R	37.8487	1246140	ARS433.1	3540	same	1	leading	TFIID-dominated	-0.0566547	-0.0620894	rest	39.6925	41.1679	-1.47539	43.1752	44.4223	-1.2471
YDR388W	4	1249632	50.6935	40.1949	1250220	ARS433.1	7620	same	1	leading	TFIID-dominated	ND	ND	ND	41.4423	43.4026	-1.96031	49.1745	50.9781	-1.80369
YDR387C	4	1250452	52.7508	39.913	1249920	ARS433.1	7320	opposite	1	leading	TFIID-dominated	-0.394564	-0.0847408	rest	39.2727	39.0209	0.251859	39.7328	45.3719	-5.63911
YDR389W	4	1251504	55.2722	40.9758	1252080	ARS433.1	9480	same	1	leading	TFIID-dominated	0.106186	0.610902	rest	40.9787	42.7443	-1.76563	46.2373	46.4766	-0.239335
YDR390C	4	1257380	60.0099	42.7944	1256850	ARS433.1	14250	opposite	1	leading	TFIID-dominated	-0.0815019	0.231349	rest	43.9427	44.0623	-0.119624	52.532	50.1432	2.3888
YDR392W	4	1258128	58.9945	43.0677	1258710	ARS433.1	16110	same	1	leading	SAGA-dominated	ND	ND	ND	44.5523	45.7827	-1.23043	54.5794	49.6815	4.89788
YDR391C	4	1258964	55.8981	43.0323	1258410	ARS433.1	15810	opposite	1	leading	TFIID-dominated	-0.419794	-0.191892	rest	44.1784	46.7025	-2.52413	53.0115	51.3465	1.66502
YDR393W	4	1259344	54.8552	43.0646	1259910	ARS433.1	17310	same	1	leading	ND	ND	ND	ND	43.6131	46.521	-2.90789	52.22	48.2543	3.96573
YDR394W	4	1261056	56.4383	42.8619	1261620	ARS434.0	-17380	opposite	0.3	lagging	TFIID-dominated	0.54573	0.459577	rest	45.1719	42.1382	3.03373	49.8035	48.6364	1.1671
YDR395W	4	1262696	55.7073	42.2138	1263270	ARS434.0	-15730	opposite	0.3	lagging	TFIID-dominated	0.462706	0.76325	rest	42.3465	41.5854	0.761149	46.733	46.6654	0.0676747
YDR398W	4	1266840	46.6363	39.9698	1267410	ARS434.0	-11590	opposite	0.3	lagging	TFIID-dominated	ND	ND	ND	42.5524	41.4796	1.07281	49.1443	50.9747	-1.83039
YDR397C	4	1267468	46.2984	40.2817	1266930	ARS434.0	-12070	same	0.3	lagging	SAGA-dominated	0.617873	0.489016	rest	42.3648	43.2954	-0.930588	46.3529	47.888	-1.53519
YDR399W	4	1269496	45.3722	38.5114	1270080	ARS434.0	-8920	opposite	0.3	lagging	SAGA-dominated	2.20325	1.13492	rest	42.0546	37.8268	4.22777	46.3125	43.3	3.01251
YDR400W	4	1270496	47.0315	38.0236	1271070	ARS434.0	-7930	opposite	0.3	lagging	TFIID-dominated	0.349623	-0.0280999	G1	38.0549	35.0608	2.99412	43.1391	39.567	3.57209
YDR402C	4	1274195	44.6113	37.0493	1273650	ARS434.0	-5350	same	0.3	lagging	TFIID-dominated	-0.763555	-0.828538	rest	35.9298	35.723	0.206808	38.756	35.7658	2.99027
YDR403W	4	1274880	41.7661	36.9046	1275450	ARS434.0	-3550	opposite	0.3	lagging	TFIID-dominated	ND	ND	ND	38.2352	36.7831	1.45209	40.3439	39.2834	1.06053
YDR405W	4	1277072	41.9128	37.1962	1277640	ARS434.0	-1360	opposite	0.3	lagging	TFIID-dominated	ND	ND	ND	40.4691	38.6104	1.85872	44.4119	41.3401	3.07172
YDR404C	4	1277860	43.2582	37.0935	1277310	ARS434.0	-1690	same	0.3	lagging	TFIID-dominated	0.866873	0.333237	rest	39.2588	38.9792	0.279575	45.0367	41.3692	3.66742
YDR406W	4	1278702	44.5879	37.5806	1279290	ARS434.0	290	same	0.666667	leading	TFIID-dominated	-0.712427	-0.205367	rest	40.8846	41.2232	-0.338593	42.7312	44.1783	-1.44717
YDR406W-A	4	1283291	51.6321	38.7525	1283880	ARS434.0	4880	same	0.666667	leading	ND	ND	ND	ND	38.7041	39.8556	-1.15158	43.4808	43.9493	-0.468512
YDR407C	4	1288508	48.2689	39.1307	1287960	ARS434.0	8960	opposite	0.666667	leading	TFIID-dominated	0.0499243	0.192181	rest	41.3597	41.4569	-0.0972041	44.4171	47.9689	-3.55175
YDR409W	4	1288872	48.4352	38.9772	1289460	ARS435.0	-10340	opposite	0	lagging	TFIID-dominated	ND	ND	ND	40.9787	37.7608	3.21789	43.7135	40.6465	3.06704
YDR408C	4	1289428	48.3037	39.0461	1288890	ARS434.0	9890	opposite	0.666667	leading	TFIID-dominated	0.467373	0.944025	rest	39.6756	40.2702	-0.594594	40.9519	45.2722	-4.32023
YDR410C	4	1293644	36.5447	37.9607	1293090	ARS435.0	-6710	same	0	lagging	TFIID-dominated	ND	ND	ND	42.6877	38.0044	4.68328	41.2583	39.7438	1.5145
YDR412W	4	1294120	35.7131	37.4164	1294710	ARS435.0	-5090	opposite	0	lagging	TFIID-dominated	ND	ND	ND	40.3527	35.2403	5.11245	40.0367	36.5928	3.44385
YDR411C	4	1294956	36.4627	37.607	1294410	ARS435.0	-5390	same	0	lagging	TFIID-dominated	0.356473	0.546791	rest	41.2303	39.4831	1.74719	47.1913	44.246	2.94531
YDR413C	4	1295903	38.5798	37.2167	1295370	ARS435.0	-4430	same	0	lagging	TFIID-dominated	ND	ND	ND	40.0035	35.0823	4.92121	39.9524	36.1624	3.78996
YDR414C	4	1297178	39.8242	36.5679	1296630	ARS435.0	-3170	same	0	lagging	TFIID-dominated	0.411273	0.0187373	rest	40.4944	36.0423	4.45207	36.8569	35.4226	1.43431
YDR416W	4	1297848	38.5968	35.8676	1298430	ARS435.0	-1370	opposite	0	lagging	TFIID-dominated	ND	ND	ND	35.4874	33.4424	2.04504	34.1993	30.9637	3.23565
YDR415C	4	1298700	38.801	35.8676	1298160	ARS435.0	-1640	same	0	lagging	TFIID-dominated	-0.0125019	-0.44103	rest	36.1289	36.6141	-0.485252	34.4021	35.6023	-1.2002
YDR418W	4	1301056	36.1023	34.502	1301640	ARS435.1	-160	opposite	0	lagging	TFIID-dominated	2.29312	1.77572	rest	30.1728	28.1483	2.02455	31.106	25.9276	5.17832
YDR419W	4	1302656	39.0557	33.7627	1303230	ARS435.1	1430	same	0.5	leading	TFIID-dominated	-0.276182	-0.582264	rest	34.0834	34.2406	-0.157231	30.3635	34.4742	-4.11063
YDR417C	4	1302418	39.0557	34.2998	1301880	ARS435.1	80	opposite	0.5	leading	TFIID-dominated	ND	ND	ND	27.5939	30.1674	-2.57351	25.1754	31.1854	-6.0099
YDR420W	4	1305384	52.5934	33.1458	1305960	ARS435.2	-1440	opposite	0	lagging	TFIID-dominated	-0.35518	0.505425	rest	39.1068	37.5893	1.51754	43.9505	40.7616	3.18893
YDR421W	4	1311456	46.4198	33.5378	1312020	ARS435.2	4620	same	0.428571	leading	TFIID-dominated	-0.589536	-0.178961	rest	39.1527	41.0529	-1.90025	42.3714	40.4629	1.90846
YDR422C	4	1318332	63.0913	36.8535	1317780	ARS435.2	10380	opposite	0.428571	leading	TFIID-dominated	ND	ND	ND	42.5057	42.4686	0.0370446	49.6203	48.1419	1.47839
YDR423C	4	1319732	64.7419	37.8753	1319190	ARS435.2	11790	opposite	0.428571	leading	TFIID-dominated	0.142173	0.465792	rest	44.3012	45.1827	-0.881456	52.5381	54.4132	-1.87511
YDR425W	4	1319472	65.2573	38.2187	1320060	ARS435.2	12660	same	0.428571	leading	TFIID-dominated	ND	ND	ND	40.9085	43.7378	-2.82938	49.0144	48.8833	0.131074
YDR424C	4	1320388	63.785	38.2187	1319850	ARS435.2	12450	opposite	0.428571	leading	TFIID-dominated	0.706373	0.099973	rest	40.8952	44.1882	-3.29303	49.2187	50.5753	-1.35654
YDR427W	4	1321664	60.588	39.9206	1322250	ARS435.2	14850	same	0.428571	leading	TFIID-dominated	1.04637	0.224292	rest	43.331	42.5803	0.750658	51.7486	49.0182	2.73049
YDR426C	4	1322498	60.0615	39.5856	1321950	ARS435.2	14550	opposite	0.428571	leading	TFIID-dominated	ND	ND	ND	41.2985	43.7305	-2.43199	48.3692	49.2019	-0.832627
YDR429C	4	1325828	66.7819	41.7734	1325280	ARS437.0	-16520	same	0.272727	lagging	TFIID-dominated	0.794073	0.791352	rest	45.2917	42.4132	2.87841	52.3194	48.7513	3.56804
YDR431W	4	1327882	69.8191	43.1756	1328460	ARS437.0	-13340	opposite	0.272727	lagging	ND	ND	ND	ND	45.4971	43.261	2.23607	55.3782	54.79	0.588156
YDR432W	4	1328275	67.5284	43.3568	1328850	ARS437.0	-12950	opposite	0.272727	lagging	TFIID-dominated	ND	ND	ND	47.1758	43.3888	3.787	50.9319	49.3485	1.5834
YDR430C	4	1329036	62.6583	43.1756	1328490	ARS437.0	-13310	same	0.272727	lagging	TFIID-dominated	-0.00871022	-0.0615574	rest	46.8651	43.7204	3.14471	53.24	49.4292	3.81076
YDR433W	4	1329092	62.6583	43.6737	1329660	ARS437.0	-12140	opposite	0.272727	lagging	TFIID-dominated	ND	ND	ND	49.4852	43.921	5.56417	51.0249	49.228	1.79691
YDR434W	4	1330624	56.3439	44.0326	1331190	ARS437.0	-10610	opposite	0.272727	lagging	TFIID-dominated	0.395945	0.300227	rest	44.437	43.4515	0.985529	45.7735	45.17	0.603512
YDR436W	4	1334072	50.4249	44.3051	1334640	ARS437.0	-7160	opposite	0.272727	lagging	TFIID-dominated	ND	ND	ND	43.4783	42.0024	1.47592	50.1263	46.3102	3.81602
YDR435C	4	1334484	49.3235	44.301	1333950	ARS437.0	-7850	same	0.272727	lagging	SAGA-dominated	-0.569427	-0.119343	rest	43.1963	42.5549	0.641398	52.846	50.5548	2.29117
YDR437W	4	1336844	47.6611	44.0511	1337430	ARS437.0	-4370	opposite	0.272727	lagging	TFIID-dominated	0.419706	0.128407	rest	40.3411	41.3371	-0.996058	42.0113	40.7865	1.22485
YDR438W	4	1337766	46.5032	43.8818	1338330	ARS437.0	-3470	opposite	0.272727	lagging	TFIID-dominated	0.0183017	0.276191	rest	41.4698	40.4406	1.02925	44.2422	41.2471	2.9951
YDR439W	4	1339168	42.1562	43.5449	1339740	ARS437.0	-2060	opposite	0.272727	lagging	TFIID-dominated	-0.0208412	-0.166909	rest	41.8665	40.1371	1.72936	46.0677	39.5171	6.5506
YDR440W	4	1341896	40.3285	42.6808	1342470	ARS437.0	670	same	1	leading	TFIID-dominated	-0.458182	-0.308792	G1	40.4941	39.0415	1.45261	40.8026	45.1586	-4.35599
YDR442W	4	1345139	38.0015	40.8216	1345710	ARS437.1	-90	opposite	0.5	lagging	TFIID-dominated	ND	ND	ND	35.5635	35.2768	0.286726	43.7087	33.7489	9.95974
YDR441C	4	1345708	36.6543	41.1203	1345170	ARS437.1	-630	same	0.5	lagging	TFIID-dominated	0.874973	0.619525	rest	36.1321	36.6434	-0.511298	42.621	33.7662	8.85475
YDR444W	4	1349704	43.4661	38.1915	1350270	ARS437.3	70	same	1	leading	TFIID-dominated	ND	ND	ND	39.1993	40.4668	-1.26748	34.6553	35.4219	-0.766578
YDR443C	4	1350516	41.7689	38.4322	1349970	ARS437.3	-230	same	nd	lagging	TFIID-dominated	-0.639166	-0.475014	rest	35.5917	30.659	4.93277	35.8641	33.4365	2.42757
YDR446W	4	1353217	39.4525	37.4952	1353780	ARS437.5	-820	opposite	0	lagging	ND	-0.00502689	-0.705275	rest	32.6382	30.2229	2.41525	31.653	31.4186	0.234398
YDR445C	4	1353081	39.2241	37.5003	1352550	ARS437.4	-50	same	1	lagging	TFIID-dominated	ND	ND	ND	40.9769	38.8052	2.17171	33.5719	34.8506	-1.2787
YDR448W	4	1355464	43.3252	37.8634	1356030	ARS437.6	-170	opposite	0.5	lagging	TFIID-dominated	ND	ND	ND	34.4436	29.7241	4.71951	37.4183	29.3886	8.02962
YDR447C	4	1356100	43.169	37.8634	1355550	ARS437.6	-650	same	0.5	lagging	TFIID-dominated	2.12187	1.50497	rest	33.6279	33.2741	0.353807	33.3287	32.3117	1.01696
YDR450W	4	1359384	42.113	39.2593	1359960	ARS437.7	160	same	1	leading	TFIID-dominated	ND	ND	ND	36.6459	37.8509	-1.20499	34.4253	36.9804	-2.55516
YDR449C	4	1359444	42.113	38.8906	1358910	ARS437.7	-890	same	nd	lagging	TFIID-dominated	0.888087	0.348189	rest	36.2386	34.904	1.33465	37.8968	34.6818	3.21505
YDR452W	4	1362232	42.8007	40.1276	1362810	ARS437.8	1010	same	0.428571	leading	TFIID-dominated	ND	ND	ND	38.2651	36.7409	1.52423	40.8824	39.2566	1.62575
YDR451C	4	1362724	42.5986	40.0255	1362180	ARS437.8	380	opposite	0.428571	leading	TFIID-dominated	0.576373	0.354038	S	38.8013	40.5136	-1.71227	41.4715	39.2737	2.19781
YDR453C	4	1366212	51.4448	40.2151	1365660	ARS437.8	3860	opposite	0.428571	leading	SAGA-dominated	0.21854	-0.300058	rest	37.8341	40.7627	-2.92866	41.6845	41.4085	0.276003
YDR456W	4	1366928	53.009	39.895	1367490	ARS437.8	5690	same	0.428571	leading	TFIID-dominated	ND	ND	ND	41.7288	45.4945	-3.76576	43.4192	47.5468	-4.12751
YDR454C	4	1367356	53.149	40.03	1366800	ARS437.8	5000	opposite	0.428571	leading	TFIID-dominated	0.54404	0.265608	rest	40.1051	42.0922	-1.98716	41.0326	43.5104	-2.47778
YDR455C	4	1368173	52.715	39.73	1367640	ARS437.8	5840	opposite	0.428571	leading	TFIID-dominated	ND	ND	ND	42.3001	44.2428	-1.94274	42.7355	47.7299	-4.99435
YDR457W	4	1369152	52.4346	38.7291	1369740	ARS437.8	7940	same	0.428571	leading	TFIID-dominated	-0.0050126	0.283637	rest	41.2143	40.9413	0.27302	41.7194	43.7801	-2.06068
YDR458C	4	1382588	38.6089	31.7967	1382040	ARS439.5.0	-2160	same	0.666667	lagging	TFIID-dominated	-0.228016	-0.106709	rest	39.8636	37.7772	2.0864	45.2832	38.524	6.75918
YDR460W	4	1383168	38.3034	32.5016	1383750	ARS439.5.0	-450	opposite	0.666667	lagging	TFIID-dominated	ND	ND	ND	35.4662	34.7062	0.760026	39.6253	35.7544	3.87093
YDR459C	4	1384044	41.387	32.3055	1383510	ARS439.5.0	-690	same	0.666667	lagging	TFIID-dominated	-0.132027	0.0368172	rest	38.178	36.627	1.55104	38.4729	36.8072	1.66568
YDR461W	4	1384608	43.9358	33.1014	1385190	ARS439.5.1	-610	opposite	0	lagging	ND	1.81262	-0.939497	G1	36.85	37.1896	-0.339586	40.3566	35.9141	4.44254
YDR462W	4	1385520	49.0761	33.2917	1386090	ARS439.5.1	290	same	1	leading	TFIID-dominated	0.940373	0.349078	rest	38.7219	38.1739	0.548034	35.3139	41.2404	-5.92649
YDR461C-A	4	1386316	51.1131	33.2917	1385760	ARS439.5.1	-40	same	0	lagging	ND	ND	ND	ND	39.4325	39.7049	-0.272326	41.9744	36.1764	5.79799
YDR463W	4	1386264	51.1131	33.6408	1386840	ARS439.5.2	-960	opposite	0	lagging	TFIID-dominated	0.0998106	0.525093	rest	36.5623	37.2923	-0.730026	36.992	36.2977	0.694345
YDR464W	4	1388240	48.4198	34.1849	1388820	ARS439.5.2	1020	same	1	leading	TFIID-dominated	-0.472033	0.38893	rest	41.6913	41.7091	-0.017801	44.0363	46.1284	-2.09209
YDR464C-A	4	1393172	46.8311	34.8965	1392630	ARS439.5.3	2030	opposite	0	leading	ND	ND	ND	ND	43.1807	43.1159	0.0648271	41.5291	49.1279	-7.59885
YDR466W	4	1394512	48.8946	35.3345	1395090	ARS440.0	-3510	opposite	0	lagging	TFIID-dominated	ND	ND	ND	40.9186	40.3872	0.531425	43.9869	45.1752	-1.18832
YDR465C	4	1395124	49.44	35.3345	1394580	ARS439.5.3	3980	opposite	0	leading	TFIID-dominated	-0.304377	0.171055	rest	41.8851	39.81	2.0751	42.249	44.6662	-2.41723
YDR467C	4	1398401	44.2917	36.3236	1397850	ARS440.0	-750	same	0	lagging	TFIID-dominated	ND	ND	ND	40.0416	38.5537	1.48795	43.3007	45.5026	-2.20182
YDR469W	4	1398496	44.2917	36.7226	1399080	ARS440.0	480	same	nd	leading	TFIID-dominated	ND	ND	ND	39.4787	39.4981	-0.0194106	43.0115	43.8739	-0.862324
YDR468C	4	1399348	47.2239	36.7226	1398810	ARS440.0	210	opposite	nd	leading	TFIID-dominated	0.0156231	-0.190818	rest	38.4651	40.3894	-1.92434	45.6816	42.6765	3.00517
YDR471W	4	1401192	46.8452	37.9063	1401780	ARS440.1	-1020	opposite	0.5	lagging	TFIID-dominated	ND	ND	ND	38.8988	31.4885	7.41039	37.2632	32.9771	4.28612
YDR470C	4	1401796	45.7243	37.7244	1401240	ARS440.1	-1560	same	0.5	lagging	TFIID-dominated	-0.0468412	-0.247812	rest	36.7791	37.7173	-0.938234	40.1398	41.4672	-1.32737
YDR472W	4	1402704	45.8637	38.3804	1403280	ARS440.1	480	same	1	leading	TFIID-dominated	1.10254	0.641687	rest	36.6633	35.3223	1.34099	34.0688	47.0708	-13.0021
YDR473C	4	1406404	45.1039	38.9115	1405860	ARS440.2	-2340	same	1	lagging	TFIID-dominated	-0.312127	-0.380808	rest	36.5706	36.4551	0.115473	42.3846	38.4328	3.95176
YDR475C	4	1410684	54.6905	39.4634	1410150	ARS440.3	-650	same	1	lagging	TFIID-dominated	-0.334536	0.1178	rest	41.2606	40.2473	1.01332	45.2767	42.9741	2.30261
YDR477W	4	1411576	56.8755	39.6245	1412160	ARS440.4	-1240	opposite	ND	lagging	TFIID-dominated	ND	ND	ND	42.3818	40.8526	1.52915	47.2018	45.4886	1.71319
YDR476C	4	1411676	57.1476	39.5704	1411140	ARS440.3	340	opposite	nd	leading	TFIID-dominated	-0.0752269	0.675633	rest	40.9506	40.1569	0.793761	40.9192	41.2378	-0.318629
YDR478W	4	1414040	57.8026	39.9395	1414620	ARS440.4	1220	same	ND	leading	TFIID-dominated	0.117498	-0.0220643	rest	43.043	44.3664	-1.32337	49.1868	49.9513	-0.764483
YDR480W	4	1416832	60.1569	40.531	1417410	ARS440.4	4010	same	ND	leading	TFIID-dominated	ND	ND	ND	45.0203	45.4493	-0.428924	49.2595	53.0604	-3.8009
YDR479C	4	1417412	61.7357	40.4126	1416870	ARS440.4	3470	opposite	ND	leading	TFIID-dominated	0.142456	0.660507	rest	42.73	44.0104	-1.28034	47.9605	45.589	2.37155
YDR481C	4	1420788	68.1725	41.4112	1420230	ARS440.4	6830	opposite	ND	leading	TFIID-dominated	0.403623	0.627778	G1	43.7426	42.942	0.800614	54.0712	53.2225	0.848654
YDR483W	4	1420616	68.1725	41.7685	1421190	ARS440.4	7790	same	ND	leading	TFIID-dominated	ND	ND	ND	42.2854	46.6107	-4.3253	48.8185	48.8875	-0.0690148
YDR482C	4	1421436	68.669	41.5863	1420890	ARS440.4	7490	opposite	ND	leading	TFIID-dominated	-0.0788769	-0.163242	rest	41.4545	43.1973	-1.74274	51.0297	50.4941	0.535567
YDR484W	4	1422232	67.372	42.3408	1422810	ARS440.4	9410	same	ND	leading	TFIID-dominated	0.0625953	-0.3323	rest	44.0548	48.2971	-4.24225	52.1719	51.7163	0.45559
YDR485C	4	1427716	62.041	43.4466	1427160	ARS440.4	13760	opposite	ND	leading	TFIID-dominated	-0.618127	-0.0412481	rest	46.4028	47.1256	-0.722815	55.3906	54.0792	1.3114
YDR486C	4	1428652	60.8575	43.3677	1428120	ARS440.4	14720	opposite	ND	leading	TFIID-dominated	0.25954	0.204094	rest	43.7221	46.6174	-2.89529	56.7672	53.8753	2.89188
YDR487C	4	1429540	59.6339	43.2707	1428990	ARS440.4	15590	opposite	ND	leading	TFIID-dominated	0.320073	0.755465	rest	42.4844	46.1126	-3.62815	56.7021	53.6523	3.04978
YDR489W	4	1430496	58.446	42.5014	1431060	ARS441.0	-14940	opposite	0.6	lagging	TFIID-dominated	ND	ND	ND	46.5421	44.7336	1.80852	53.3797	52.4652	0.914421
YDR488C	4	1431300	57.196	42.5014	1430760	ARS441.0	-15240	same	0.6	lagging	SAGA/TFIID	-1.09196	0.38763	G1	46.3976	45.818	0.579601	55.9869	53.3342	2.65268
YDR492W	4	1434208	58.1496	39.3334	1434780	ARS441.0	-11220	opposite	0.6	lagging	TFIID-dominated	ND	ND	ND	42.9797	41.2359	1.74382	47.5564	47.5665	-0.0101616
YDR490C	4	1434860	57.7449	39.826	1434330	ARS441.0	-11670	same	0.6	lagging	TFIID-dominated	-0.358252	-0.075621	rest	44.7617	45.3257	-0.563939	51.2764	50.2484	1.02797
YDR491C	4	1435483	57.0424	39.3334	1434930	ARS441.0	-11070	same	0.6	lagging	TFIID-dominated	ND	ND	ND	43.2949	42.2524	1.04251	51.7525	49.4476	2.30489
YDR493W	4	1435608	55.8991	37.7667	1436190	ARS441.0	-9810	opposite	0.6	lagging	TFIID-dominated	0.703373	0.0277818	M/G1	40.4017	39.9321	0.469573	45.403	45.0023	0.40071
YDR494W	4	1436336	54.4012	37.2306	1436910	ARS441.0	-9090	opposite	0.6	lagging	TFIID-dominated	0.118998	0.0715937	rest	40.9591	37.4552	3.50395	38.768	39.5981	-0.830155
YDR495C	4	1441700	43.231	32.794	1441170	ARS441.0	-4830	same	0.6	lagging	ND	-0.162252	-0.415765	rest	40.056	40.5949	-0.538961	45.653	44.0417	1.61132
YDR496C	4	1443932	39.3838	31.2617	1443390	ARS441.0	-2610	same	0.6	lagging	TFIID-dominated	0.638811	0.833045	rest	39.941	35.1401	4.80085	40.3626	38.6329	1.72977
YDR497C	4	1446044	39.9764	30.1619	1445490	ARS441.0	-510	same	0.6	lagging	TFIID-dominated	0.436206	1.41001	rest	38.5709	37.2793	1.29157	39.2097	37.627	1.58276
YDR499W	4	1447304	43.1674	29.5045	1447890	ARS441.0	1890	same	0.5	leading	TFIID-dominated	ND	ND	ND	36.0688	34.2015	1.86731	35.2785	37.3826	-2.10417
YDR498C	4	1447532	43.1674	29.6765	1446990	ARS441.0	990	opposite	0.5	leading	TFIID-dominated	-0.594527	0.157629	rest	36.6632	36.689	-0.025832	35.1738	40.5302	-5.35637
YDR501W	4	1450728	38.4114	29.6229	1451310	ARS441.2	-90	opposite	0.5	lagging	TFIID-dominated	ND	ND	ND	36.9509	38.1382	-1.18728	38.5624	35.5782	2.98421
YDR500C	4	1451380	36.5065	29.5463	1450830	ARS441.2	-570	same	0.5	lagging	TFIID-dominated	2.04071	0.959889	rest	33.7554	36.2366	-2.4812	39.0232	36.2729	2.75031
YDR502C	4	1454996	37.1808	30.4593	1454460	ARS441.3	660	opposite	0	leading	TFIID-dominated	-0.0231269	0.258006	rest	34.9589	34.3838	0.575103	37.9108	37.1637	0.747088
YDR503C	4	1456404	31.8548	31.0123	1455870	ARS441.3	2070	opposite	0	leading	TFIID-dominated	0.227773	-0.0375169	G1	31.3209	29.3633	1.95759	28.4359	30.1249	-1.68902
YDR505C	4	1459712	38.2522	31.88	1459170	ARS442.0	170	opposite	0	leading	TFIID-dominated	-0.291588	0.0396178	rest	32.3824	37.3055	-4.9231	30.7242	37.8576	-7.13338
YDR506C	4	1462076	32.2302	31.9555	1461540	ARS442.2	-260	same	1	lagging	TFIID-dominated	-0.59621	-0.885445	rest	33.6003	28.5773	5.02299	27.6498	28.5137	-0.86386
YDR507C	4	1466396	36.0789	31.9871	1465860	ARS442.5	-740	same	1	lagging	SAGA-dominated	-0.153894	0.492456	G1	35.2826	32.5355	2.74709	34.7509	31.6139	3.137
YDR509W	4	1467718	34.2471	32.4438	1468290	ARS442.6	-710	opposite	0	lagging	TFIID-dominated	ND	ND	ND	38.4475	38.2382	0.209271	43.669	37.954	5.71508
YDR510W	4	1468816	36.7141	32.7885	1469400	ARS442.6	400	same	1	leading	TFIID-dominated	ND	ND	ND	39.4731	41.1223	-1.64923	40.6138	42.0106	-1.39686
YDR508C	4	1468988	36.7141	32.4438	1468440	ARS442.6	-560	same	0	lagging	TFIID-dominated	0.888023	1.21033	rest	36.0557	35.3107	0.744986	42.7551	36.2904	6.46469
YDR511W	4	1469488	37.9988	33.0016	1470060	ARS442.7	-940	opposite	0	lagging	TFIID-dominated	0.706873	0.386165	rest	38.335	37.2723	1.06273	41.6865	42.0881	-0.401649
YDR510C-A	4	1470303	40.811	33.0016	1469760	ARS442.6	760	opposite	1	leading	ND	ND	ND	ND	38.5774	40.7453	-2.1679	40.1543	40.6582	-0.503829
YDR513W	4	1470456	42.4601	33.5098	1471020	ARS442.7	20	same	nd	leading	SAGA-dominated	0.209873	-0.263028	rest	37.1235	37.7359	-0.612358	39.4191	42.1408	-2.72172
YDR512C	4	1471324	44.7449	33.5098	1470780	ARS442.7	-220	same	0	lagging	TFIID-dominated	0.464123	0.210356	rest	37.7867	36.8039	0.982811	41.6776	39.7496	1.92799
YDR515W	4	1472704	41.7847	35.151	1473270	ARS442.7	2270	same	nd	leading	TFIID-dominated	ND	ND	ND	42.6354	42.8396	-0.204279	42.1014	40.2389	1.86251
YDR514C	4	1473540	40.7492	34.7967	1473000	ARS442.7	2000	opposite	nd	leading	TFIID-dominated	-0.328841	0.0546205	rest	39.6517	40.905	-1.25334	45.4688	46.6479	-1.17908
YDR517W	4	1476616	46.939	37.499	1477200	ARS446.0	200	same	1	leading	TFIID-dominated	ND	ND	ND	38.389	42.2073	-3.81831	41.5013	42.7764	-1.27519
YDR516C	4	1477012	47.3228	37.0766	1476480	ARS446.0	-520	same	nd	lagging	TFIID-dominated	-0.44777	-0.332113	rest	40.9408	40.4215	0.519335	44.4102	44.4984	-0.0881829
YDR518W	4	1478072	47.6987	37.7615	1478640	ARS446.1	40	same	0.75	leading	TFIID-dominated	-0.124939	-0.203234	rest	38.9741	38.6355	0.338621	39.6277	41.1667	-1.53894
YDR519W	4	1479864	47.6856	37.8137	1480440	ARS446.1	1840	same	0.75	leading	TFIID-dominated	0.156373	0.112202	rest	40.8843	40.9784	-0.0940968	41.3747	41.679	-0.304331
YDR521W	4	1482633	48.5993	37.0823	1483200	ARS446.1	4600	same	0.75	leading	TFIID-dominated	ND	ND	ND	37.9393	37.6663	0.273	39.3353	41.4632	-2.12796
YDR520C	4	1483988	46.8024	37.0823	1483440	ARS446.1	4840	opposite	0.75	leading	TFIID-dominated	0.0383731	0.114712	rest	38.3355	40.353	-2.01747	41.6556	40.5651	1.09052
YDR522C	4	1485795	48.6719	36.4606	1485240	ARS446.2	-5360	same	0.6	lagging	TFIID-dominated	-0.528377	-0.896964	rest	33.8844	33.7838	0.100665	36.2812	35.5953	0.685956
YDR523C	4	1487524	46.5974	36.1155	1486980	ARS446.2	-3620	same	0.6	lagging	ND	-0.482064	-0.874122	rest	38.8664	39.385	-0.518562	38.9045	40.0309	-1.12636
YDR524W-C	4	1488895	49.9951	35.9549	1489470	ARS446.2	-1130	opposite	0.6	lagging	ND	ND	ND	ND	39.6075	36.8665	2.74105	46.7295	40.5374	6.19206
YDR525W	4	1489397	50.7999	35.9821	1489980	ARS446.2	-620	opposite	0.6	lagging	ND	ND	ND	ND	39.8426	38.0355	1.80706	44.9053	38.7546	6.15066
YDR524C	4	1489580	50.7999	35.9451	1489050	ARS446.2	-1550	same	0.6	lagging	TFIID-dominated	1.14837	0.804379	rest	38.4287	38.7864	-0.357654	41.9301	37.0057	4.92433
YDR525W-A	4	1490088	51.2036	36.0234	1490670	ARS446.2	70	same	1	leading	ND	ND	ND	ND	38.7956	39.1469	-0.351339	39.9223	40.9871	-1.06484
YDR524C-A	4	1490482	50.9502	35.9821	1489950	ARS446.2	-650	same	0.6	lagging	ND	ND	ND	ND	39.9136	37.5859	2.32768	47.045	40.219	6.82597
YDR524C-B	4	1490290	51.2036	35.9821	1489740	ARS446.2	-860	same	0.6	lagging	ND	2.69237	2.70466	ND	39.7005	37.0818	2.61867	48.1375	40.7028	7.43465
YDR526C	4	1492037	50.1803	36.1352	1491480	ARS446.2	880	opposite	1	leading	TFIID-dominated	ND	ND	ND	38.368	39.3942	-1.02625	41.001	40.7248	0.276269
YDR528W	4	1493776	41.74	36.5133	1494360	ARS447.0	-2640	opposite	0.5	lagging	TFIID-dominated	0.679484	0.387456	G1	40.1143	37.8678	2.24655	43.5508	40.1582	3.39262
YDR529C	4	1497084	44.1841	36.7707	1496550	ARS447.0	-450	same	0.5	lagging	TFIID-dominated	0.181873	0.915175	rest	41.4574	37.7512	3.7062	43.4541	41.4499	2.00429
YDR531W	4	1497664	41.4417	37.1778	1498230	ARS447.0	1230	same	0.5	leading	TFIID-dominated	ND	ND	ND	36.5316	38.9214	-2.38977	31.8029	42.1274	-10.3246
YDR530C	4	1498460	40.1832	37.0536	1497930	ARS447.0	930	opposite	0.5	leading	TFIID-dominated	-0.343727	0.054008	rest	36.7459	40.3215	-3.57563	30.9433	40.6972	-9.75385
YDR532C	4	1501060	44.7085	37.8503	1500510	ARS447.1	-3290	same	1	lagging	TFIID-dominated	-0.145698	-0.332385	rest	35.8985	35.8237	0.0748368	44.8268	32.5663	12.2605
YDR533C	4	1502884	43.8742	38.7492	1502340	ARS447.1	-1460	same	1	lagging	SAGA-dominated	-0.287627	-0.226997	rest	31.1719	32.1617	-0.989855	30.7392	27.1975	3.54171
YDR534C	4	1505391	43.2565	39.9256	1504860	ARS447.2	-140	same	1	lagging	ND	-1.09296	-0.119125	rest	38.0359	33.99	4.04592	37.7628	31.7057	6.05709
YDR536W	4	1507440	46.7841	40.9681	1508010	ARS447.3	210	same	1	leading	TFIID-dominated	-0.67205	-0.253644	rest	38.314	41.3389	-3.02491	36.5403	39.4819	-2.94168
YDR535C	4	1507853	46.7621	40.8391	1507320	ARS447.3	-480	same	nd	lagging	TFIID-dominated	ND	ND	ND	36.6005	38.2438	-1.64329	38.5681	36.3234	2.24463
YDR538W	4	1509504	48.4781	41.2677	1510080	ARS447.3	2280	same	1	leading	TFIID-dominated	-0.266627	0.0563679	rest	40.0587	37.9808	2.07788	38.8361	38.6972	0.138915
YDR539W	4	1511480	52.9026	41.2344	1512060	ARS447.3	4260	same	1	leading	SAGA/TFIID	-0.452627	-0.295827	rest	38.9823	39.1669	-0.184565	38.0103	38.1089	-0.0985402
YDR537C	4	1511951	51.6213	41.2698	1511400	ARS447.3	3600	opposite	1	leading	TFIID-dominated	ND	ND	ND	40.3083	37.5799	2.72848	39.22	38.7062	0.513725
YDR540C	4	1518292	53.4376	40.0907	1517760	ARS447.3	9960	opposite	1	leading	TFIID-dominated	-0.477127	-0.992272	rest	41.3814	40.1569	1.22452	44.1128	44.3817	-0.26892
YEL077W-A	5	129	0	36.2871	690	ARS502.0	-3910	opposite	ND	lagging	ND	ND	ND	ND	0	0		0	0
YEL077C	5	4596	R	37.3994	4050	ARS502.0	-550	same	ND	lagging	TFIID-dominated	ND	ND	ND	0	0		0	0
YEL075W-A	5	4369	R	37.4877	4950	ARS502.0	350	same	ND	leading	ND	ND	ND	ND	0	0		0	0
YEL076C-A	5	5613	R	37.4877	5070	ARS502.0	470	opposite	ND	leading	TFIID-dominated	ND	ND	ND	0	0		0	0
YEL074W	5	5625	R	37.4763	6210	ARS503.0	-1190	opposite	0	lagging	TFIID-dominated	ND	ND	ND	42.8896	38.2776	4.61203	48.0073	38.7262	9.2811
YEL075C	5	6212	R	37.4936	5670	ARS502.0	1070	opposite	ND	leading	TFIID-dominated	-0.560752	-1.34239	G1	47.1594	48.6325	-1.4731	53.3612	39.2754	14.0858
YEL073C	5	8052	49.3527	37.3021	7500	ARS503.0	100	opposite	nd	leading	TFIID-dominated	-0.241091	-0.331483	rest	34.9384	34.0829	0.855462	35.0328	40.3614	-5.32852
YEL072W	5	13068	54.4895	35.9856	13650	ARS504.2.0	1050	same	1	leading	TFIID-dominated	-0.386309	-0.134025	rest	35.4763	38.8984	-3.42206	37.2837	38.9344	-1.65065
YEL071W	5	15676	66.2459	35.7485	16260	ARS504.2.1	-740	opposite	0	lagging	SAGA-dominated	0.45425	0.739777	rest	39.0793	38.3544	0.724927	42.0304	40.0002	2.03024
YEL070W	5	19088	83.4633	35.309	19650	ARS504.2.2	-150	opposite	ND	lagging	TFIID-dominated	-0.931794	-1.65958	rest	45.9178	42.2776	3.64019	54.5055	43.0732	11.4323
YEL069C	5	23730	64.5387	34.5485	23190	ARS504.2.3	190	opposite	0.375	leading	SAGA/TFIID	-0.77321	-0.513057	rest	41.6235	43.1463	-1.52276	43.3512	51.5823	-8.23112
YEL066W	5	25636	67.8005	33.8376	26220	ARS504.2.3	3220	same	0.375	leading	TFIID-dominated	-0.424377	-0.359071	rest	43.5	42.763	0.737013	49.5701	54.1644	-4.59428
YEL068C	5	26477	67.5125	33.8376	25920	ARS504.2.3	2920	opposite	0.375	leading	TFIID-dominated	ND	ND	ND	42.8114	42.2806	0.53085	49.2412	54.5424	-5.30121
YEL065W	5	27124	67.3226	33.5497	27690	ARS504.2.3	4690	same	0.375	leading	TFIID-dominated	-0.432427	0.20733	M	42.6855	42.0414	0.644101	47.8656	49.1965	-1.33095
YEL067C	5	27432	67.569	33.6389	26880	ARS504.2.3	3880	opposite	0.375	leading	TFIID-dominated	ND	ND	ND	43.4421	42.6103	0.8318	50.0903	55.2061	-5.11582
YEL064C	5	31784	62.6454	32.9789	31230	ARS504.2.3	8230	opposite	0.375	leading	TFIID-dominated	-0.471794	0.179502	G1	41.2004	46.0043	-4.80387	54.936	56.9339	-1.99789
YEL062W	5	33820	62.7153	32.5657	34410	ARS504.2.3	11410	same	0.375	leading	TFIID-dominated	ND	ND	ND	40.1808	41.8557	-1.675	46.7876	49.3429	-2.55534
YEL063C	5	34208	63.4731	32.7107	33660	ARS504.2.3	10660	opposite	0.375	leading	SAGA-dominated	0.385484	1.10239	rest	40.8669	42.1078	-1.24085	50.5877	51.516	-0.928331
YEL061C	5	40160	45.0986	31.1733	39630	ARS507.0	-14170	same	0.6	lagging	TFIID-dominated	-0.026973	0.93346	S	41.069	38.8102	2.2588	44.9016	43.6393	1.26227
YEL059W	5	42151	45.1357	29.6096	42720	ARS507.0	-11080	opposite	0.6	lagging	TFIID-dominated	ND	ND	ND	37.9573	35.2271	2.73019	43.5224	36.7995	6.72283
YEL060C	5	42512	45.9663	29.9053	41970	ARS507.0	-11830	same	0.6	lagging	SAGA-dominated	-0.492021	0.870913	S	40.9726	40.359	0.613648	50.531	46.7371	3.79386
YEL058W	5	42716	45.9663	29.2971	43290	ARS507.0	-10510	opposite	0.6	lagging	TFIID-dominated	ND	ND	ND	38.7165	34.7738	3.9427	45.1018	37.5981	7.5037
YEL059C-A	5	43200	46.3447	29.6096	42660	ARS507.0	-11140	same	0.6	lagging	TFIID-dominated	-0.994627	-0.773157	rest	38.1928	35.8981	2.2946	44.7151	37.6592	7.05585
YEL056W	5	46604	41.76	25.9754	47190	ARS507.0	-6610	opposite	0.6	lagging	TFIID-dominated	ND	ND	ND	37.9594	33.2099	4.74945	42.7202	32.6516	10.0686
YEL057C	5	46352	41.5284	26.9507	45810	ARS507.0	-7990	same	0.6	lagging	TFIID-dominated	-0.0123412	-0.520424	rest	36.5397	36.6309	-0.09123	45.8048	35.84	9.96476
YEL055C	5	52104	38.8806	21.4778	51570	ARS507.0	-2230	same	0.6	lagging	TFIID-dominated	0.682179	0.342132	rest	31.0151	34.1199	-3.10478	33.3906	31.3145	2.0761
YEL053W-A	5	52407	37.5014	20.4274	52980	ARS507.0	-820	opposite	0.6	lagging	ND	ND	ND	ND	27.5199	28.194	-0.674136	30.7457	28.8836	1.86212
YEL054C	5	53792	33.8574	20.1733	53250	ARS507.0	-550	same	0.6	lagging	TFIID-dominated	1.58304	1.45196	rest	29.9553	29.1385	0.816772	31.7059	29.3903	2.31567
YEL052W	5	56036	35.5905	19.9193	56610	ARS507.1	-790	opposite	0.5	lagging	TFIID-dominated	ND	ND	ND	24.6494	26.4535	-1.80412	22.0476	22.8776	-0.82997
YEL053C	5	56680	35.1392	19.8029	56130	ARS507.1	-1270	same	0.5	lagging	TFIID-dominated	-0.204071	-0.563984	rest	26.1236	27.6415	-1.51791	29.9504	26.4785	3.47195
YEL051W	5	57820	36.5881	20.9262	58410	ARS507.1	1010	same	1	leading	TFIID-dominated	0.533248	-0.0199632	rest	20.7481	21.8069	-1.05889	20.3762	21.4313	-1.05515
YEL050W-A	5	59048	45.2221	21.6577	59610	ARS507.2	-990	opposite	0	lagging	ND	ND	ND	ND	23.1596	22.3536	0.806017	22.1867	22.5254	-0.338678
YEL050C	5	61416	41.6774	22.859	60870	ARS507.2	270	opposite	0	leading	TFIID-dominated	0.478273	-0.0960981	rest	22.9766	24.579	-1.60233	23.3701	24.2054	-0.835321
YEL049W	5	63227	34.728	24.6595	63810	ARS507.4	-390	opposite	0	lagging	TFIID-dominated	-1.20538	-0.484833	rest	29.6823	28.4862	1.1961	35.8278	28.8459	6.98191
YEL048C	5	65664	33.543	25.3641	65130	ARS507.5	-670	same	1	lagging	TFIID-dominated	0.532206	-0.0793504	rest	28.6111	29.9629	-1.35179	37.6177	30.3653	7.25238
YEL047C	5	67320	36.8503	25.6994	66780	ARS507.6	-220	same	1	lagging	TFIID-dominated	0.646873	-0.104918	G1	29.7853	37.1779	-7.39263	40.6418	33.3734	7.26847
YEL044W	5	68548	41.773	25.4814	69120	ARS507.7	-280	opposite	0.666667	lagging	TFIID-dominated	ND	ND	ND	37.0684	36.567	0.501347	37.4217	39.0787	-1.65707
YEL046C	5	69291	43.3323	25.4814	68760	ARS507.7	-640	same	0.666667	lagging	TFIID-dominated	1.67437	2.2539	rest	36.0279	35.9219	0.106009	39.1138	34.587	4.52681
YEL045C	5	69764	43.9819	25.4814	69210	ARS507.7	-190	same	0.666667	lagging	TFIID-dominated	ND	ND	ND	36.8341	37.757	-0.9229	38.7917	37.865	0.926694
YEL043W	5	69932	43.9819	25.1628	70500	ARS507.7	1100	same	1	leading	TFIID-dominated	-0.293263	0.17183	rest	37.0394	38.5044	-1.46503	38.1926	44.382	-6.18942
YEL042W	5	73084	45.8395	24.5273	73650	ARS507.7	4250	same	1	leading	TFIID-dominated	0.0745606	0.861227	S	37.994	38.4729	-0.478903	39.0039	42.0574	-3.05349
YEL041W	5	75164	48.1601	24.1449	75750	ARS507.7	6350	same	1	leading	TFIID-dominated	-0.202555	-0.510773	rest	35.594	36.954	-1.36	39.4248	41.1032	-1.67837
YEL040W	5	77532	41.3685	23.65	78120	ARS508.0	-4080	opposite	0.333333	lagging	SAGA-dominated	1.33077	1.0978	M/G1	40.9512	37.722	3.22922	39.5428	35.9449	3.59787
YEL038W	5	79876	42.8798	22.8586	80460	ARS508.0	-1740	opposite	0.333333	lagging	TFIID-dominated	ND	ND	ND	37.9043	33.8519	4.05247	38.7707	32.9806	5.79012
YEL039C	5	80672	39.9251	23.06	80130	ARS508.0	-2070	same	0.333333	lagging	TFIID-dominated	0.785873	-0.0191755	rest	38.6739	36.256	2.41792	40.0893	34.5487	5.54059
YEL037C	5	83280	39.1035	21.4525	82740	ARS508.0	540	opposite	0	leading	TFIID-dominated	-0.145752	0.128971	rest	35.1659	36.725	-1.55912	36.5003	40.6891	-4.18879
YEL036C	5	85280	30.8039	19.909	84750	ARS508.1	550	opposite	0	leading	TFIID-dominated	-0.0885269	0.505677	rest	34.7186	36.404	-1.6854	35.319	36.923	-1.60396
YEL034W	5	85175	31.2636	19.4837	85740	ARS508.2	-60	opposite	0	lagging	TFIID-dominated	ND	ND	ND	32.4498	29.6238	2.82601	31.2357	28.3384	2.8973
YEL033W	5	85678	31.3794	19.0487	86250	ARS508.3	-150	opposite	ND	lagging	TFIID-dominated	ND	ND	ND	30.9054	26.9719	3.93354	31.2864	27.5013	3.78508
YEL035C	5	86044	32.6339	19.4837	85500	ARS508.2	-300	same	0	lagging	TFIID-dominated	1.52487	1.30949	rest	30.1286	34.4389	-4.31027	35.5065	33.4643	2.04218
YEL032W	5	86396	32.6339	18.1636	86970	ARS508.3	570	same	ND	leading	TFIID-dominated	-0.112919	-0.473126	M/G1	26.1966	27.6293	-1.43276	22.704	22.7253	-0.0213752
YEL034C-A	5	86714	33.9899	19.0487	86160	ARS508.3	-240	same	ND	lagging	ND	ND	ND	ND	32.3172	29.63	2.68721	31.7116	28.4107	3.30095
YEL032C-A	5	87700	34.0477	18.1636	87150	ARS508.3	750	opposite	ND	leading	ND	ND	ND	ND	30.5181	30.5547	-0.0365882	27.1655	23.9334	3.23216
YEL031W	5	89732	35.3309	15.709	90300	ARS508.4	2100	same	1	leading	TFIID-dominated	0.157967	0.345612	rest	14.3844	14.8499	-0.465494	13.0328	15.6081	-2.57535
YEL030W	5	93708	36.517	14.2514	94290	ARS508.6	-1110	opposite	0.5	lagging	TFIID-dominated	-0.755502	-0.487052	rest	18.3332	19.9356	-1.60243	18.5946	19.9164	-1.32181
YEL030C-A	5	95396	36.4673	14.3262	94860	ARS508.6	-540	same	0.5	lagging	ND	ND	ND	ND	17.5056	19.0171	-1.51155	19.1331	18.8333	0.299859
YEL028W	5	98167	42.4328	15.5422	98730	ARS508.8	-1470	opposite	0	lagging	TFIID-dominated	ND	ND	ND	25.9758	25.9755	0.000283808	25.5933	23.5141	2.07927
YEL029C	5	98368	42.4328	15.3139	97830	ARS508.7	1230	opposite	0	leading	TFIID-dominated	-0.269841	-0.270544	rest	24.5522	25.5239	-0.971753	22.2574	22.9338	-0.676432
YEL027W	5	100196	38.0512	16.4952	100770	ARS508.8	570	same	nd	leading	TFIID-dominated	1.91777	0.425338	rest	27.0385	28.0558	-1.01732	27.7213	30.462	-2.74068
YEL026W	5	101284	37.6972	17.223	101850	ARS508.8	1650	same	nd	leading	TFIID-dominated	1.99337	1.06944	rest	26.6325	27.7705	-1.138	26.4054	34.1635	-7.75818
YEL024W	5	106660	45.0693	20.318	107250	ARS508.9	-150	opposite	0.5	lagging	TFIID-dominated	ND	ND	ND	38.5182	31.9956	6.52259	35.217	31.3476	3.86939
YEL025C	5	107432	48.4283	20.318	106890	ARS508.9	-510	same	0.5	lagging	TFIID-dominated	-0.140156	-0.0239411	M	32.9208	31.7367	1.18408	34.635	31.9743	2.66078
YEL022W	5	110836	51.4423	24.1663	111420	ARS508.9	4020	same	0.4	leading	TFIID-dominated	ND	ND	ND	37.2135	38.7431	-1.52959	41.6745	42.0929	-0.41848
YEL023C	5	111616	51.281	23.712	111060	ARS508.9	3660	opposite	0.4	leading	TFIID-dominated	-0.456905	-0.565922	rest	36.3753	35.944	0.431375	36.852	39.6686	-2.81663
YEL021W	5	115620	61.2731	27.5687	116190	ARS508.9	8790	same	0.4	leading	TFIID-dominated	ND	ND	ND	43.2705	42.6037	0.666864	51.7181	52.3183	-0.60026
YEL020W-A	5	116644	62.1624	27.9968	117210	ARS508.9	9810	same	0.4	leading	ND	0.838373	1.2149	ND	42.1028	41.9408	0.161922	51.0596	54.207	-3.14739
YEL020C-B	5	117879	60.3441	28.1679	117330	ARS508.9	9930	opposite	0.4	leading	ND	ND	ND	ND	41.9081	41.7664	0.14172	51.0996	53.8413	-2.74172
YEL020C	5	120798	62.2216	28.8757	120240	ARS508.9	12840	opposite	0.4	leading	TFIID-dominated	-0.556627	-0.299849	rest	42.4743	41.1756	1.29864	51.7325	53.0887	-1.35621
YEL019C	5	121824	55.9811	29.0752	121290	ARS508.9	13890	opposite	0.4	leading	TFIID-dominated	ND	ND	ND	40.6601	45.0808	-4.42066	51.4329	54.0342	-2.60126
YEL018C-A	5	122487	52.0859	29.1758	121950	ARS508.9	14550	opposite	0.4	leading	ND	ND	ND	ND	39.4592	43.3236	-3.8644	54.5271	51.7852	2.74188
YEL017W	5	122692	52.0859	29.3788	123270	ARS508.9	15870	same	0.4	leading	TFIID-dominated	ND	ND	ND	40.0242	41.4976	-1.4734	45.8287	51.3514	-5.52269
YEL017C-A	5	123536	49.8863	29.3788	123000	ARS508.9	15600	opposite	0.4	leading	SAGA-dominated	1.33587	1.49786	rest	39.0131	41.2055	-2.19245	51.8103	56.7184	-4.90817
YEL015W	5	126092	48.1751	29.9987	126660	ARS510.0	-12740	opposite	0.375	lagging	TFIID-dominated	ND	ND	ND	39.8702	36.5095	3.36074	43.9404	39.046	4.89446
YEL016C	5	126912	49.3305	29.9987	126360	ARS510.0	-13040	same	0.375	lagging	TFIID-dominated	-0.346044	0.558458	rest	39.2836	38.7614	0.522255	47.4381	41.001	6.4371
YEL013W	5	128084	47.5987	30.0386	128670	ARS510.0	-10730	opposite	0.375	lagging	TFIID-dominated	0.78179	0.495073	rest	35.2799	34.8694	0.410437	43.0555	34.9668	8.08872
YEL014C	5	129107	41.8039	30.0386	128550	ARS510.0	-10850	same	0.375	lagging	TFIID-dominated	ND	ND	ND	39.0387	37.6745	1.36422	44.8824	40.6975	4.18492
YEL012W	5	131140	36.6808	28.968	131730	ARS510.0	-7670	opposite	0.375	lagging	TFIID-dominated	-0.462127	-0.767503	rest	41.6128	39.8027	1.81008	43.1132	39.4828	3.63043
YEL011W	5	132588	46.7377	27.8518	133170	ARS510.0	-6230	opposite	0.375	lagging	SAGA-dominated	-0.735002	-0.686715	rest	36.0508	34.8849	1.16588	39.1554	37.1424	2.01296
YEL010W	5	135778	R	25.0394	136350	ARS510.0	-3050	opposite	0.375	lagging	ND	ND	ND	ND	29.8448	32.9135	-3.06864	32.5391	33.6702	-1.13108
YEL009C-A	5	137277	42.9076	24.5664	136740	ARS510.0	-2660	same	0.375	lagging	ND	ND	ND	ND	29.8204	32.9706	-3.15027	32.729	33.3493	-0.620355
YEL008W	5	140011	35.5742	21.3964	140580	ARS510.1	-420	opposite	0.5	lagging	TFIID-dominated	ND	ND	ND	36.6014	30.984	5.61741	25.5918	27.3705	-1.77863
YEL009C	5	140864	35.0019	21.3964	140310	ARS510.1	-690	same	0.5	lagging	TFIID-dominated	2.44544	1.00984	rest	28.29	30.6282	-2.3382	32.107	28.5044	3.60259
YEL007W	5	140996	35.0019	20.8119	141570	ARS510.1	570	same	1	leading	TFIID-dominated	0.729456	0.699217	rest	23.1841	26.0445	-2.86044	22.5181	24.3418	-1.82369
YEL008C-A	5	141317	35.2209	21.0937	140760	ARS510.1	-240	same	0.5	lagging	ND	ND	ND	ND	37.0421	31.4531	5.58903	25.6643	27.5088	-1.84444
YEL006W	5	143780	35.7594	19.6946	144360	ARS510.3	-1040	opposite	0	lagging	TFIID-dominated	0.422873	-0.0536367	rest	18.7063	20.0552	-1.3489	19.4004	19.8569	-0.456453
YEL004W	5	146404	38.0005	18.962	146970	ARS510.4	-830	opposite	0.5	lagging	TFIID-dominated	ND	ND	ND	21.842	24.8421	-3.00008	22.1677	24.0092	-1.84153
YEL005C	5	147288	38.4197	19.0319	146730	ARS510.4	-1070	same	0.5	lagging	TFIID-dominated	-0.143327	-0.657377	rest	21.6842	21.9508	-0.266684	20.6964	20.9862	-0.289752
YEL003W	5	147620	39.4251	18.9043	148200	ARS510.4	400	same	0.5	leading	TFIID-dominated	0.925873	-0.122062	rest	25.0328	25.4184	-0.385539	25.019	25.2724	-0.253418
YEL002C	5	150584	37.5398	19.1878	150030	ARS510.4	2230	opposite	0.5	leading	TFIID-dominated	0.587811	0.0463455	rest	27.2616	27.477	-0.215401	26.8981	32.7519	-5.85387
YEL001C	5	151528	38.1174	19.5396	150990	ARS510.5	-2410	same	1	lagging	TFIID-dominated	0.464623	0.0576863	rest	25.2335	25.9403	-0.706826	23.822	25.242	-1.42003
YER001W	5	152972	41.0917	20.7921	153540	ARS510.5	140	same	1	leading	SAGA/TFIID	0.0386004	1.16906	G1	29.816	29.3937	0.422344	31.4532	33.9429	-2.48976
YER002W	5	156268	39.3194	22.0934	156840	ARS510.6	-2960	opposite	0.333333	lagging	TFIID-dominated	0.39204	0.0957744	rest	31.8053	30.3295	1.47578	37.8871	33.1168	4.77036
YER004W	5	158836	37.3667	22.5393	159420	ARS510.6	-380	opposite	0.333333	lagging	TFIID-dominated	ND	ND	ND	37.4011	35.591	1.81016	41.9044	35.172	6.7324
YER003C	5	159656	37.5115	22.5248	159120	ARS510.6	-680	same	0.333333	lagging	SAGA/TFIID	-0.0923769	0.700919	S	34.9309	37.2362	-2.30526	40.7268	36.045	4.68184
YER005W	5	159988	37.5115	22.5028	160560	ARS511.0	360	same	ND	leading	TFIID-dominated	0.168373	0.17444	rest	35.7549	36.284	-0.529105	31.5578	40.244	-8.68619
YER006W	5	162180	41.0013	22.1895	162750	ARS511.1	-1050	opposite	0	lagging	TFIID-dominated	0.249956	0.493562	rest	28.1408	29.1708	-1.03005	33.122	28.4028	4.71913
YER007W	5	163948	40.9864	21.6016	164520	ARS511.1	720	same	0.5	leading	TFIID-dominated	ND	ND	ND	26.0944	26.8758	-0.781388	26.1878	31.8274	-5.63965
YER006C-A	5	165159	40.3215	21.6016	164610	ARS511.1	810	opposite	0.5	leading	ND	ND	ND	ND	28.8206	27.9693	0.85124	27.1601	32.9767	-5.81657
YER007C-A	5	167424	36.9608	20.5814	166890	ARS511.2	290	opposite	0	leading	TFIID-dominated	1.49657	0.347366	rest	25.5376	26.3442	-0.806571	25.5959	29.6449	-4.049
YER009W	5	171564	28.3158	18.7629	172140	ARS511.4	-260	opposite	0	lagging	TFIID-dominated	ND	ND	ND	17.2609	13.9327	3.32816	15.6175	15.2771	0.340373
YER008C	5	172384	30.2489	18.7629	171840	ARS511.3	440	opposite	0	leading	TFIID-dominated	-0.289805	-0.145331	rest	23.9185	27.0207	-3.1022	24.5664	24.6372	-0.0708074
YER010C	5	173888	39.2011	18.7187	173340	ARS511.4	940	opposite	nd	leading	TFIID-dominated	-0.23801	-0.232442	rest	12.6941	16.8319	-4.13781	13.3672	15.7846	-2.41738
YER011W	5	174708	38.123	19.0382	175290	ARS511.5	-110	opposite	0	lagging	SAGA/TFIID	ND	ND	ND	24.2553	23.0846	1.17063	23.1189	22.4577	0.661186
YER012W	5	177260	39.875	20.3697	177840	ARS511.6	-1960	opposite	0	lagging	TFIID-dominated	1.27027	0.109775	rest	25.4298	29.4364	-4.00656	24.3738	29.3693	-4.99555
YER013W	5	178316	38.5912	21.5501	178890	ARS511.6	-910	opposite	0	lagging	TFIID-dominated	-0.598346	-0.270069	rest	29.4844	34.568	-5.08362	32.5051	33.2877	-0.782589
YER014W	5	182060	38.3051	24.614	182640	ARS511.5.0	-1560	opposite	0	lagging	TFIID-dominated	-0.901627	-0.756671	rest	29.7132	35.3981	-5.68484	36.0349	32.8329	3.20205
YER015W	5	183972	38.9531	26.0752	184560	ARS511.5.0	360	same	0.5	leading	TFIID-dominated	-0.436841	-0.501207	rest	32.4595	30.5618	1.89772	33.3664	39.2662	-5.89981
YER014C-A	5	185198	40.3557	26.0752	184650	ARS511.5.0	450	opposite	0.5	leading	ND	-0.990794	-0.413008	ND	33.7563	29.4727	4.28364	31.3341	35.9811	-4.64697
YER016W	5	187732	41.8454	27.7316	188310	ARS511.5.1	510	same	1	leading	TFIID-dominated	-0.220827	0.155946	G1	40.6567	39.712	0.944712	41.6007	43.7897	-2.18896
YER019W	5	192348	54.4909	28.624	192930	ARS511.5.3	330	same	0.5	leading	TFIID-dominated	ND	ND	ND	36.7975	42.0516	-5.25414	42.4915	52.6488	-10.1573
YER018C	5	193216	61.3233	28.5773	192660	ARS511.5.3	60	opposite	0.5	leading	TFIID-dominated	0.346873	0.822221	G2	38.2771	39.25	-0.972864	41.4615	51.0465	-9.58499
YER020W	5	194564	60.5389	28.8233	195150	ARS511.5.4	1350	same	0.75	leading	SAGA-dominated	ND	ND	ND	36.6426	37.3756	-0.73302	39.5426	44.4231	-4.8805
YER019C-A	5	195128	59.8595	28.7662	194580	ARS511.5.4	780	opposite	0.75	leading	TFIID-dominated	1.15154	1.61527	rest	33.9901	41.2004	-7.21023	39.4309	50.7131	-11.2822
YER021W	5	196388	59.8423	29.1581	196950	ARS511.5.4	3150	same	0.75	leading	TFIID-dominated	0.826373	0.446191	rest	35.8723	41.1101	-5.23778	36.4908	43.4726	-6.9818
YER022W	5	198284	59.5435	29.5361	198870	ARS511.5.4	5070	same	0.75	leading	TFIID-dominated	ND	ND	ND	38.1925	39.7084	-1.51595	41.1427	46.4818	-5.33905
YER023W	5	200532	54.5498	30.2679	201120	ARS512.0	-5480	opposite	0.25	lagging	TFIID-dominated	-0.0298769	0.589467	rest	39.389	38.3424	1.04662	50.9579	43.681	7.27689
YER024W	5	201660	52.9114	30.5336	202230	ARS512.0	-4370	opposite	0.25	lagging	SAGA-dominated	-0.292327	0.122017	rest	42.0438	39.1528	2.89097	48.0791	42.6923	5.38674
YER023C-A	5	202232	51.9073	30.4048	201690	ARS512.0	-4910	same	0.25	lagging	ND	ND	ND	ND	39.6127	38.4179	1.19475	51.0044	45.9495	5.05481
YER025W	5	204692	54.0899	31.0776	205260	ARS512.0	-1340	opposite	0.25	lagging	TFIID-dominated	ND	ND	ND	42.1965	37.4977	4.69879	39.9526	38.1049	1.84764
YER026C	5	209056	46.108	31.0201	208500	ARS512.1	700	opposite	0	leading	TFIID-dominated	0.834373	0.623719	rest	33.3842	35.3909	-2.00671	36.0738	40.1518	-4.07806
YER027C	5	210848	45.8463	30.6897	210300	ARS512.2	-300	same	1	lagging	TFIID-dominated	-0.323189	0.0134665	rest	39.022	37.0722	1.94973	45.3283	41.0282	4.30018
YER028C	5	212456	47.9929	30.4302	211920	ARS512.3	-280	same	1	lagging	TFIID-dominated	-0.511044	-0.15957	rest	38.2948	37.6946	0.600208	48.0687	40.0554	8.01332
YER030W	5	212868	50.4065	30.2196	213450	ARS512.4	50	same	1	leading	TFIID-dominated	ND	ND	ND	37.6508	38.9197	-1.26896	36.6263	41.4953	-4.86905
YER029C	5	213744	54.4838	30.2836	213210	ARS512.4	-190	same	nd	lagging	TFIID-dominated	-0.224877	-0.0470266	rest	39.4875	38.4907	0.996837	47.7917	40.1263	7.6654
YER032W	5	214492	55.669	30.06	215070	ARS512.5	470	same	0.5	leading	TFIID-dominated	ND	ND	ND	37.699	41.4403	-3.74125	39.9556	44.9897	-5.0341
YER031C	5	215280	54.377	30.1084	214740	ARS512.5	140	opposite	0.5	leading	TFIID-dominated	-0.0347519	0.379559	rest	38.6585	40.2612	-1.60271	36.7209	42.9376	-6.21662
YER034W	5	221344	61.2825	29.9937	221910	ARS512.9	-1090	opposite	0	lagging	TFIID-dominated	ND	ND	ND	41.0714	39.5649	1.5065	51.2677	47.8882	3.37941
YER033C	5	222000	62.0558	29.957	221460	ARS512.8	1260	opposite	0	leading	TFIID-dominated	-1.13132	-0.735658	rest	40.1838	40.3683	-0.184582	47.1726	48.8637	-1.69112
YER035W	5	222137	62.4388	30.0362	222720	ARS512.9	-280	opposite	0	lagging	SAGA-dominated	ND	ND	ND	40.8894	39.4549	1.43455	49.7288	47.2164	2.51239
YER037W	5	225316	66.7865	30.603	225900	ARS512.10	500	same	ND	leading	SAGA-dominated	ND	ND	ND	40.2617	40.0473	0.214443	43.0655	46.8288	-3.76329
YER036C	5	225744	65.62	30.3748	225210	ARS512.10	-190	same	ND	lagging	TFIID-dominated	0.765516	1.04617	rest	40.7499	37.5238	3.2261	43.4339	43.3339	0.100042
YER038W-A	5	227949	65.0714	31.4774	228510	ARS512.11	-890	opposite	0.666667	lagging	ND	ND	ND	ND	45.7857	42.8735	2.91217	58.0382	51.3478	6.69036
YER038C	5	228808	74.0057	31.271	228270	ARS512.11	-1130	same	0.666667	lagging	TFIID-dominated	ND	ND	ND	41.4413	40.5655	0.875809	48.4664	44.8276	3.6388
YER039C	5	229703	76.5452	31.6947	229170	ARS512.11	-230	same	0.666667	lagging	TFIID-dominated	-0.121877	0.237258	rest	45.383	43.0955	2.28753	57.7516	51.1596	6.59193
YER040W	5	229212	75.981	31.9197	229800	ARS512.11	400	same	0.428571	leading	ND	ND	ND	ND	43.8686	44.1532	-0.284609	48.5234	55.9471	-7.42369
YER039C-A	5	229979	76.5452	31.9197	229440	ARS512.11	40	opposite	0.428571	leading	ND	-0.313127	0.408966	ND	43.1328	44.3905	-1.25766	49.3633	56.0523	-6.68893
YER041W	5	231892	73.2238	33.2432	232470	ARS512.11	3070	same	0.428571	leading	TFIID-dominated	-0.420927	-0.288325	rest	42.5276	44.6955	-2.16788	52.0416	53.5188	-1.47717
YER042W	5	234348	76.9575	34.0101	234930	ARS512.11	5530	same	0.428571	leading	TFIID-dominated	1.29004	0.331752	G2	42.6024	45.7707	-3.16831	51.0849	54.2224	-3.13747
YER043C	5	237696	73.1891	34.2115	237150	ARS512.11	7750	opposite	0.428571	leading	TFIID-dominated	1.02767	1.92551	rest	44.0307	43.9729	0.0578202	52.4351	55.752	-3.31682
YER044C-A	5	239904	70.799	33.9142	239370	ARS512.11	9970	opposite	0.428571	leading	TFIID-dominated	ND	ND	ND	45.45	43.8641	1.58596	52.6508	56.1637	-3.51291
YER045C	5	242256	69.5809	33.4023	241710	ARS512.11	12310	opposite	0.428571	leading	TFIID-dominated	-0.552577	-0.106298	rest	42.1499	43.4016	-1.25168	51.9502	56.883	-4.93272
YER046W	5	241996	70.5704	33.1119	242580	ARS513.5.0	-12820	opposite	ND	lagging	TFIID-dominated	ND	ND	ND	44.2685	46.1731	-1.90459	54.4961	53.2048	1.29133
YER046W-A	5	243198	67.9634	32.8236	243780	ARS513.5.0	-11620	opposite	ND	lagging	ND	ND	ND	ND	43.9283	45.2276	-1.29929	50.0195	59.7548	-9.73531
YER047C	5	247200	70.7829	32.1925	246660	ARS513.5.0	-8740	same	ND	lagging	TFIID-dominated	-0.376907	0.0556241	rest	42.6295	44.012	-1.38259	54.6132	54.0705	0.542751
YER048C	5	248760	64.3946	32.1101	248220	ARS513.5.0	-7180	same	ND	lagging	TFIID-dominated	-0.591327	-0.15289	rest	46.7124	42.304	4.40835	54.9457	48.2569	6.6888
YER048W-A	5	250132	R	32.2236	250710	ARS513.5.0	-4690	opposite	ND	lagging	ND	0.478873	0.264014	ND	44.6557	41.9862	2.66947	49.0169	46.2763	2.74061
YER049W	5	251148	54.7665	32.2879	251730	ARS513.5.0	-3670	opposite	ND	lagging	TFIID-dominated	0.171873	0.639847	rest	39.6886	40.5617	-0.873105	48.6337	46.3496	2.28409
YER051W	5	254140	56.8566	32.4215	254730	ARS513.5.0	-670	opposite	ND	lagging	TFIID-dominated	ND	ND	ND	39.9689	39.3121	0.656735	44.5914	43.5528	1.03855
YER050C	5	254952	56.4533	32.4215	254400	ARS513.5.0	-1000	same	ND	lagging	TFIID-dominated	ND	ND	ND	40.0046	40.6586	-0.654007	45.3222	44.836	0.486245
YER052C	5	258592	59.0773	32.5048	258060	ARS513.5.1	1060	opposite	ND	leading	SAGA-dominated	0.0826231	1.29592	rest	39.5071	39.1792	0.327935	48.4498	49.4851	-1.03531
YER053C	5	260384	58.0263	32.5121	259830	ARS513.5.1	2830	opposite	ND	leading	SAGA-dominated	-0.447127	0.221743	rest	39.2411	40.1932	-0.952107	47.2407	47.6535	-0.412833
YER053C-A	5	261600	58.0962	32.5209	261060	ARS513.5.2	-3540	same	ND	lagging	ND	-0.813127	-2.01043	ND	39.3602	39.426	-0.0657431	46.1185	45.1255	0.992962
YER054C	5	264640	58.6784	32.6084	264090	ARS513.5.2	-510	same	ND	lagging	TFIID-dominated	-0.492527	-0.614341	rest	40.2014	41.1745	-0.97307	48.5567	43.6283	4.92837
YER055C	5	266408	56.8129	32.5862	265860	ARS513.5.2	1260	opposite	ND	leading	TFIID-dominated	1.15212	1.49456	rest	38.3329	40.8276	-2.49477	44.6294	49.2725	-4.64315
YER056C	5	268696	48.0012	32.3199	268140	ARS513.5.3	-2460	same	1	lagging	SAGA-dominated	0.999191	1.2902	rest	40.1232	36.0738	4.04943	43.5388	42.0583	1.48053
YER056C-A	5	270720	46.3919	31.7722	270180	ARS513.5.3	-420	same	1	lagging	TFIID-dominated	1.92467	1.65463	rest	41.3701	40.4399	0.930163	47.5389	43.7241	3.81486
YER057C	5	271696	43.0368	31.4088	271140	ARS513.5.3	540	opposite	0	leading	TFIID-dominated	0.260373	0.134957	rest	40.9071	42.7925	-1.88535	44.2155	49.8988	-5.68332
YER059W	5	271964	43.0368	30.773	272550	ARS513.5.4	750	same	1	leading	TFIID-dominated	-0.0244602	-0.175669	rest	36.9503	38.039	-1.08875	38.977	40.9042	-1.92726
YER060W	5	273932	41.383	29.8119	274500	ARS513.5.6	-500	opposite	0	lagging	TFIID-dominated	-0.0458412	0.133044	rest	38.8998	34.6132	4.28662	43.7782	36.9008	6.87737
YER060W-A	5	276069	40.3507	28.8905	276630	ARS513.5.7	430	same	1	leading	ND	-0.26627	-0.226241	rest	32.9281	37.3918	-4.46375	34.5766	43.6142	-9.03759
YER061C	5	280160	41.0415	28.0748	279630	ARS513.7.1	-970	same	1	lagging	TFIID-dominated	-0.0694126	-0.418128	rest	35.8433	32.9397	2.90359	41.1495	30.9779	10.1716
YER063W	5	281132	41.6478	27.9335	281700	ARS513.7.2	-500	opposite	0	lagging	TFIID-dominated	ND	ND	ND	32.8379	29.9839	2.85403	40.7379	33.5528	7.18515
YER062C	5	281328	40.6445	27.9781	280770	ARS513.7.1	170	opposite	nd	leading	SAGA-dominated	-0.241002	-0.641162	rest	37.7114	39.3317	-1.62027	34.6325	47.3009	-12.6685
YER064C	5	284800	41.0818	27.8659	284250	ARS514.0	450	opposite	0	leading	SAGA-dominated	0.831686	0.94587	rest	29.5993	32.561	-2.96171	27.1108	37.5148	-10.4041
YER065C	5	287744	42.5175	27.5993	287190	ARS514.2	590	opposite	0	leading	TFIID-dominated	0.272818	0.623713	rest	35.1862	28.6083	6.57787	28.6683	25.8746	2.79371
YER066W	5	288852	39.8178	27.1279	289440	ARS514.4	440	same	1	leading	TFIID-dominated	-0.502427	-0.862242	rest	31.0164	29.4984	1.51799	31.2108	32.6373	-1.42649
YER067W	5	291276	42.0608	26.6493	291840	ARS514.5	440	same	1	leading	SAGA-dominated	-0.448527	-0.766856	rest	34.5803	34.8649	-0.284577	34.2812	38.29	-4.0088
YER068W	5	292468	44.501	26.3493	293040	ARS514.6	-1160	opposite	0	lagging	TFIID-dominated	0.0649231	0.798661	rest	36.3154	36.0676	0.247846	39.7717	33.6723	6.09938
YER066C-A	5	292700	44.501	26.5381	292170	ARS514.5	770	opposite	1	leading	SAGA-dominated	ND	ND	ND	32.014	31.7048	0.309208	30.8836	37.9488	-7.0652
YER067C-A	5	293060	44.8143	26.4371	292530	ARS514.5	1130	opposite	1	leading	ND	ND	ND	ND	34.6043	36.3494	-1.7451	34.6057	38.5257	-3.92003
YER069W	5	294852	45.5598	26.1675	295440	ARS514.5.0	-1160	opposite	0.5	lagging	SAGA-dominated	-0.608704	1.07547	rest	34.9026	36.7648	-1.86219	41.1164	35.5137	5.60278
YER068C-A	5	296229	43.0059	26.1675	295680	ARS514.5.0	-920	same	0.5	lagging	ND	ND	ND	ND	35.8956	36.7548	-0.859227	42.5897	38.6746	3.91513
YER070W	5	298236	46.1199	26.479	298800	ARS514.5.2	-600	opposite	0	lagging	SAGA-dominated	0.674945	1.86702	G1	37.3995	36.3029	1.09662	43.0921	37.5908	5.5013
YER072W	5	302212	49.3143	27.0303	302790	ARS514.5.3	990	same	0.75	leading	TFIID-dominated	ND	ND	ND	36.6109	41.7676	-5.15668	40.2798	44.515	-4.23519
YER071C	5	302864	52.2917	27.0303	302310	ARS514.5.3	510	opposite	0.75	leading	TFIID-dominated	1.75137	0.200774	rest	36.6686	41.7573	-5.08874	40.002	43.3582	-3.35617
YER073W	5	303012	52.2917	27.0109	303600	ARS514.5.3	1800	same	0.75	leading	SAGA-dominated	1.20665	1.73421	rest	38.9535	40.1889	-1.23539	44.4447	43.0829	1.3618
YER074W	5	305764	51.9343	26.4115	306330	ARS514.5.3	4530	same	0.75	leading	TFIID-dominated	2.037	1.66403	rest	39.6036	39.0896	0.514006	40.8312	45.6764	-4.84517
YER074W-A	5	307092	47.1001	25.6452	307680	ARS514.5.4	-4320	opposite	0.5	lagging	ND	0.857873	0.29633	ND	38.0988	39.0402	-0.941422	45.931	40.1923	5.73871
YER075C	5	311864	46.7943	23.2345	311310	ARS514.5.4	-690	same	0.5	lagging	TFIID-dominated	-0.248319	-0.0730567	rest	38.4293	37.918	0.511323	46.472	45.4189	1.05307
YER076W-A	5	312885	48.8754	21.9236	313470	ARS514.5.5	70	same	0.5	leading	ND	ND	ND	ND	33.7866	38.9256	-5.13906	37.1728	43.1374	-5.96463
YER076C	5	314320	48.2947	21.9236	313770	ARS514.5.5	370	opposite	0.5	leading	TFIID-dominated	-0.279439	-0.268778	rest	33.6205	37.2097	-3.58915	38.8648	43.4415	-4.5767
YER077C	5	317056	50.3184	21.6338	316500	ARS514.5.6	1500	opposite	0	leading	TFIID-dominated	-0.235127	-0.10558	rest	38.7005	39.8189	-1.1184	42.9434	51.2318	-8.2884
YER078W-A	5	318141	51.8773	22.2669	318720	ARS514.5.7	520	same	0.666667	leading	ND	ND	ND	ND	38.7231	40.1359	-1.4128	41.1802	45.5333	-4.35308
YER078C	5	319080	52.2685	22.2669	318540	ARS514.5.7	340	opposite	0.666667	leading	TFIID-dominated	-0.463055	-0.381575	rest	38.9187	41.5675	-2.64887	45.6518	51.9036	-6.25183
YER079W	5	318348	51.8773	22.2669	318930	ARS514.5.7	730	same	0.666667	leading	TFIID-dominated	ND	ND	ND	38.427	37.7959	0.631098	40.3332	44.217	-3.88377
YER080W	5	319428	51.8372	23.1233	320010	ARS514.5.8	-190	opposite	0.5	lagging	TFIID-dominated	0.122945	-0.510895	rest	39.6416	40.346	-0.704347	45.0475	45.4546	-0.407173
YER079C-A	5	320735	50.8267	23.1233	320190	ARS514.5.8	-10	same	0.5	lagging	ND	ND	ND	ND	40.0907	40.5188	-0.428115	45.9773	44.498	1.47926
YER081W	5	322181	51.9911	25	322770	ARS514.5.9	970	same	1	leading	TFIID-dominated	1.38104	1.03288	rest	38.2735	38.4735	-0.199996	37.9329	44.2878	-6.35487
YER082C	5	326488	51.9659	27.537	325950	ARS514.5.10	-1050	same	1	lagging	TFIID-dominated	ND	ND	ND	41.7454	37.6872	4.05813	50.167	45.1936	4.97338
YER084W	5	326560	51.9659	28.0974	327150	ARS514.5.10	150	same	0.5	leading	ND	ND	ND	ND	39.1073	38.6247	0.482617	40.6184	49.6752	-9.05685
YER084W-A	5	327093	52.2931	28.3414	327660	ARS514.5.10	660	same	0.5	leading	ND	ND	ND	ND	38.6677	37.9991	0.668598	39.9761	46.6734	-6.69727
YER086W	5	327884	51.9932	28.7497	328470	ARS514.5.10	1470	same	0.5	leading	TFIID-dominated	ND	ND	ND	39.0825	43.0731	-3.99057	42.1121	46.4173	-4.30517
YER085C	5	328635	52.1944	28.5593	328080	ARS514.5.10	1080	opposite	0.5	leading	ND	-0.919127	-0.833527	rest	38.729	37.9991	0.729888	39.9761	46.6734	-6.69727
YER087W	5	330012	52.8186	29.2104	330600	ARS514.5.10	3600	same	0.5	leading	TFIID-dominated	-0.281413	-0.0336129	rest	35.4487	38.1722	-2.72353	38.3114	41.7513	-3.43988
YER087C-B	5	333376	46.9321	29.1642	332820	ARS514.5.10	5820	opposite	0.5	leading	ND	1.02562	0.606165	ND	39.0682	38.4204	0.647782	41.7611	46.283	-4.52182
YER088W-B	5	335422	46.033	28.075	336000	ARS514.5.10	9000	same	0.5	leading	ND	ND	ND	ND	36.9334	36.058	0.875419	40.4533	44.9962	-4.54296
YER088C	5	335792	46.3855	28.4839	335250	ARS514.5.10	8250	opposite	0.5	leading	TFIID-dominated	0.217623	0.816653	rest	39.0356	37.9131	1.12251	43.605	48.767	-5.16202
YER088C-A	5	336514	46.6088	28.075	335970	ARS514.5.10	8970	opposite	0.5	leading	ND	ND	ND	ND	37.3166	36.9332	0.383468	39.1308	44.5243	-5.39353
YER090W	5	337364	44.6012	27.1582	337950	ARS514.5.10	10950	same	0.5	leading	TFIID-dominated	ND	ND	ND	33.3375	36.5753	-3.23785	34.209	38.6029	-4.39395
YER089C	5	337835	43.0632	27.6241	337290	ARS514.5.10	10290	opposite	0.5	leading	TFIID-dominated	0.64354	0.772542	rest	35.1365	35.3873	-0.250746	37.8313	42.0605	-4.2292
YER090C-A	5	338906	40.7696	26.928	338370	ARS514.5.10	11370	opposite	0.5	leading	ND	ND	ND	ND	37.1824	38.5891	-1.40673	35.1155	41.429	-6.31351
YER092W	5	342316	41.7895	25.4405	342900	ARS516.0	-7300	opposite	0.714286	lagging	TFIID-dominated	ND	ND	ND	38.8733	36.5042	2.36911	45.3647	32.5046	12.86
YER091C	5	342728	41.7533	25.5835	342180	ARS516.0	-8020	same	0.714286	lagging	SAGA-dominated	-0.366081	0.342132	S	36.2608	35.7439	0.516854	39.136	33.5718	5.56419
YER091C-A	5	343106	41.0529	25.4405	342570	ARS516.0	-7630	same	0.714286	lagging	ND	ND	ND	ND	36.7098	35.8819	0.827923	42.6531	34.0353	8.61786
YER093C	5	348176	32.5884	24.4965	347640	ARS516.0	-2560	same	0.714286	lagging	TFIID-dominated	-0.328656	-0.584287	rest	29.532	33.7903	-4.25832	37.755	30.8676	6.88746
YER093C-A	5	348904	34.5721	24.3897	348360	ARS516.0	-1840	same	0.714286	lagging	TFIID-dominated	0.527873	-0.114914	rest	35.0781	33.3613	1.71684	33.0841	29.2635	3.82057
YER095W	5	349420	34.9359	24.3092	350010	ARS516.0	-190	opposite	0.714286	lagging	TFIID-dominated	ND	ND	ND	26.6742	29.3743	-2.70007	23.8537	23.5616	0.292054
YER094C	5	349952	35.4324	24.3233	349410	ARS516.0	-790	same	0.714286	lagging	TFIID-dominated	0.418373	-0.0802019	rest	31.3079	31.4819	-0.173998	24.5454	30.1708	-5.62534
YER096W	5	351076	41.943	24.3562	351660	ARS516.0	1460	same	1	leading	TFIID-dominated	-0.716877	-0.79805	rest	19.7945	20.1099	-0.315403	17.1307	14.8416	2.2891
YER097W	5	354635	R	24.8416	355200	ARS516.0	5000	same	1	leading	TFIID-dominated	ND	ND	ND	26.8374	25.9165	0.920907	23.2977	23.2946	0.00310886
YER098W	5	354961	33.8611	24.9164	355530	ARS516.0	5330	same	1	leading	ND	-0.598627	-0.638077	rest	32.1076	27.6382	4.46933	28.3532	25.9933	2.35984
YER100W	5	358780	37.7863	25.2953	359370	ARS516.1	-7230	opposite	0.4	lagging	TFIID-dominated	ND	ND	ND	29.2418	33.1448	-3.90296	34.7738	31.2977	3.4761
YER099C	5	359824	43.8403	25.2953	359280	ARS516.1	-7320	same	0.4	lagging	TFIID-dominated	-0.148252	-0.325242	rest	33.3667	35.9859	-2.61925	34.693	30.7603	3.93271
YER102W	5	362204	37.0911	25.6655	362790	ARS516.1	-3810	opposite	0.4	lagging	TFIID-dominated	ND	ND	ND	30.7337	32.611	-1.87732	36.1554	33.4938	2.66152
YER101C	5	362352	37.0911	25.5418	361800	ARS516.1	-4800	same	0.4	lagging	TFIID-dominated	-0.342627	-0.851184	rest	38.0541	36.7963	1.25788	35.6995	32.6328	3.06667
YER103W	5	364012	42.2562	26.0057	364590	ARS516.1	-2010	opposite	0.4	lagging	SAGA-dominated	-0.720571	-0.417452	rest	38.5696	39.9482	-1.37859	45.2525	41.9328	3.31968
YER104W	5	366268	47.2938	26.574	366840	ARS516.1	240	same	0.5	leading	TFIID-dominated	-0.11246	0.122747	rest	35.1991	35.9023	-0.703158	37.5847	44.84	-7.25534
YER106W	5	371821	54.4793	29.2713	372390	ARS516.1	5790	same	0.5	leading	TFIID-dominated	ND	ND	ND	40.0849	40.4351	-0.350165	42.8249	45.1356	-2.31071
YER105C	5	372552	55.8444	29.2713	372000	ARS516.1	5400	opposite	0.5	leading	TFIID-dominated	ND	ND	ND	35.4433	39.4726	-4.02922	38.1762	44.417	-6.24081
YER107W-A	5	373889	54.3817	30.5265	374460	ARS516.1	7860	same	0.5	leading	ND	ND	ND	ND	40.2743	39.3901	0.884255	45.3285	44.6427	0.685803
YER107C	5	375232	57.6321	30.5265	374700	ARS516.1	8100	opposite	0.5	leading	TFIID-dominated	0.182873	0.3927	rest	41.0845	39.5528	1.53172	44.2957	44.5708	-0.275099
YER109C	5	378288	66.7381	31.7757	377730	ARS516.1	11130	opposite	0.5	leading	TFIID-dominated	-0.665177	0.234822	rest	41.69	41.3511	0.338928	48.6394	52.3187	-3.67933
YER110C	5	382736	68.1973	33.084	382200	ARS517.0	-14800	same	0.75	lagging	TFIID-dominated	0.267835	1.17184	rest	41.4677	39.8877	1.58008	49.3262	44.9254	4.4008
YER112W	5	386644	53.8196	33.0516	387210	ARS517.0	-9790	opposite	0.75	lagging	TFIID-dominated	ND	ND	ND	40.7299	39.6502	1.07974	46.8169	42.781	4.03594
YER111C	5	386688	53.8196	33.2015	386130	ARS517.0	-10870	same	0.75	lagging	TFIID-dominated	-0.196663	-0.227017	M/G1	40.6968	40.0237	0.673042	50.6655	48.3262	2.33926
YER113C	5	390664	52.6894	32.1886	390120	ARS517.0	-6880	same	0.75	lagging	TFIID-dominated	0.177373	0.360822	rest	39.7636	41.0067	-1.24312	49.8261	45.3136	4.51249
YER114C	5	394520	48.2611	30.0696	393990	ARS517.0	-3010	same	0.75	lagging	TFIID-dominated	-0.402533	0.393073	rest	40.3045	39.4592	0.845312	47.2713	42.4405	4.83078
YER115C	5	395362	44.8739	29.7445	394830	ARS517.0	-2170	same	0.75	lagging	TFIID-dominated	0.322748	-0.0864838	rest	40.8765	39.6967	1.17982	46.7782	42.2411	4.53716
YER117W	5	396172	41.5877	28.4166	396750	ARS517.0	-250	opposite	0.75	lagging	TFIID-dominated	ND	ND	ND	43.2285	37.1571	6.07142	44.5917	38.0256	6.56612
YER116C	5	396667	40.0026	28.7467	396120	ARS517.0	-880	same	0.75	lagging	TFIID-dominated	-0.51296	-0.323855	rest	38.03	37.3316	0.698371	46.4814	37.8938	8.58761
YER118C	5	399752	43.7336	26.8953	399210	ARS517.1	-990	same	1	lagging	TFIID-dominated	0.531456	0.459392	G1	39.5253	37.5959	1.9294	43.921	36.489	7.43194
YER120W	5	400596	43.354	25.9436	401160	ARS517.2	-240	opposite	0	lagging	TFIID-dominated	ND	ND	ND	37.9637	33.8279	4.13585	41.1497	33.9548	7.19486
YER119C	5	401337	42.5029	26.1519	400800	ARS517.1	600	opposite	nd	leading	TFIID-dominated	-0.289227	0.0468283	rest	35.3061	38.5532	-3.24706	32.3748	45.5196	-13.1448
YER119C-A	5	401733	42.1296	25.9436	401190	ARS517.2	-210	same	0	lagging	TFIID-dominated	ND	ND	ND	37.7301	32.567	5.16315	43.5872	33.4816	10.1056
YER121W	5	401692	42.1296	25.6004	402270	ARS517.2	870	same	nd	leading	SAGA-dominated	ND	ND	ND	37.5761	37.9644	-0.388335	39.4122	44.2498	-4.83765
YER123W	5	404124	45.3536	25.2865	404700	ARS517.3	-700	opposite	0.5	lagging	TFIID-dominated	ND	ND	ND	30.2375	28.0588	2.17866	32.7999	30.518	2.28196
YER122C	5	404928	44.4202	25.2865	404370	ARS517.3	-1030	same	0.5	lagging	TFIID-dominated	0.345873	0.458725	rest	36.2844	29.3764	6.90805	42.3476	34.0657	8.28187
YER125W	5	409172	41.531	26.9306	409740	ARS517.5	740	same	0.5	leading	TFIID-dominated	ND	ND	ND	36.2828	37.6579	-1.37513	35.4129	36.1379	-0.72497
YER124C	5	409624	45.394	26.7022	409080	ARS517.5	80	opposite	0.5	leading	SAGA-dominated	0.687429	-0.700529	G1	30.0311	29.1263	0.904837	31.0607	35.5331	-4.47237
YER127W	5	413956	48.6352	28.3123	414540	ARS517.7	-2060	opposite	0.333333	lagging	TFIID-dominated	ND	ND	ND	40.401	39.4183	0.982645	47.9611	40.5934	7.36763
YER126C	5	414752	50.8709	28.2818	414210	ARS517.7	-2390	same	0.333333	lagging	TFIID-dominated	0.34304	0.872726	rest	39.886	38.5034	1.38253	45.9772	40.4065	5.57066
YER128W	5	415324	51.6055	28.2964	415890	ARS517.7	-710	opposite	0.333333	lagging	TFIID-dominated	0.384873	-0.0131781	rest	39.7796	38.6989	1.08063	46.0627	40.3126	5.75009
YER129W	5	416268	52.4532	28.1865	416850	ARS517.7	250	same	1	leading	TFIID-dominated	0.0996856	0.294943	rest	35.9766	38.7843	-2.80768	37.346	44.5955	-7.24959
YER131W	5	423012	45.9643	26.4583	423600	ARS518.0	-4600	opposite	0.5	lagging	TFIID-dominated	ND	ND	ND	38.7651	34.4038	4.36133	46.4995	37.5539	8.94557
YER130C	5	423032	45.9643	26.6962	422490	ARS518.0	-5710	same	0.5	lagging	SAGA-dominated	0.126186	0.215841	rest	39.433	39.5777	-0.144677	45.9508	41.0809	4.86997
YER132C	5	431392	54.5695	24.3206	430860	ARS518.1	-540	same	1	lagging	TFIID-dominated	-0.0410019	0.119939	rest	31.9194	32.6981	-0.77874	39.5679	34.9394	4.62859
YER133W	5	431916	55.1564	23.9037	432480	ARS518.1	1080	same	1	leading	TFIID-dominated	ND	ND	ND	33.7594	33.8322	-0.0727721	32.1733	38.2041	-6.03076
YER133W-A	5	436686	38.3621	22.2701	437250	ARS518.4	250	same	1	leading	ND	ND	ND	ND	25.5357	24.464	1.0717	22.2102	22.1515	0.0586582
YER134C	5	438344	39.0102	22.2159	437790	ARS518.5	-410	same	1	lagging	TFIID-dominated	-0.322252	-0.641066	rest	24.3241	25.2149	-0.890846	22.1855	22.0396	0.14599
YER136W	5	438988	38.6052	22.285	439560	ARS518.6	-240	opposite	0	lagging	TFIID-dominated	ND	ND	ND	24.6594	25.6255	-0.966073	23.9948	24.5121	-0.51729
YER135C	5	438839	38.6052	22.1878	438300	ARS518.5	100	opposite	nd	leading	ND	ND	ND	ND	24.386	25.0817	-0.695678	21.8213	22.5622	-0.740917
YER137W-A	5	441070	71.1616	23.0228	441660	ARS519.0	-940	opposite	0.5	lagging	ND	ND	ND	ND	27.8543	35.2375	-7.38323	34.6025	29.9534	4.64914
YER137C	5	442352	0	23.0228	441810	ARS519.0	-790	same	0.5	lagging	TFIID-dominated	ND	-0.655329	rest	27.4187	33.9631	-6.54439	34.8166	29.6785	5.13812
YER138W-A	5	448969	R	33.2144	449550	ARS519.0	6950	same	0.5	leading	ND	ND	0.22592	ND	38.5441	37.8715	0.67266	42.2437	46.6109	-4.36717
YER140W	5	451020	59.9222	34.3475	451590	ARS519.0	8990	same	0.5	leading	TFIID-dominated	ND	ND	ND	41.243	39.4333	1.80965	45.5217	48.4774	-2.95576
YER139C	5	451864	61.5733	34.1473	451320	ARS519.0	8720	opposite	0.5	leading	TFIID-dominated	-0.341627	-0.74519	rest	38.744	38.3868	0.357209	41.886	45.615	-3.72906
YER141W	5	452900	59.4095	34.7864	453480	ARS519.0	10880	same	0.5	leading	TFIID-dominated	0.0722898	0.657165	rest	40.3763	40.7507	-0.374351	47.6398	50.2225	-2.58266
YER143W	5	455772	67.4679	35.7516	456360	ARS519.0	13760	same	0.5	leading	TFIID-dominated	ND	ND	ND	42.107	43.4839	-1.37688	52.3402	55.2012	-2.86106
YER142C	5	456600	68.8717	35.7516	456060	ARS519.0	13460	opposite	0.5	leading	TFIID-dominated	-0.304627	-0.539496	rest	43.074	43.7482	-0.674184	54.2077	57.2127	-3.00495
YER144C	5	460736	73.1791	37.7086	460200	ARS519.0	17600	opposite	0.5	leading	TFIID-dominated	-0.178127	0.395669	rest	42.2567	43.3036	-1.0469	52.5792	55.0253	-2.44602
YER146W	5	461420	74.436	38.5408	462000	ARS519.0	19400	same	0.5	leading	TFIID-dominated	ND	ND	ND	43.0022	46.0319	-3.02967	58.5782	53.9521	4.62613
YER145C	5	462272	77.6672	38.3591	461730	ARS519.0	19130	opposite	0.5	leading	TFIID-dominated	0.206206	1.11154	M	41.3961	45.6093	-4.21324	55.3708	59.3137	-3.94281
YER145C-A	5	463317	78.4902	38.7021	462780	ARS519.0	20180	opposite	0.5	leading	ND	ND	ND	ND	43.0379	46.3244	-3.28649	59.5022	54.4465	5.05569
YER148W	5	464596	75.3119	39.1823	465180	ARS519.0	22580	same	0.5	leading	TFIID-dominated	ND	ND	ND	44.6625	46.5449	-1.88244	57.8215	48.1637	9.65778
YER147C	5	465400	74.6291	39.1301	464850	ARS519.0	22250	opposite	0.5	leading	TFIID-dominated	-0.334341	0.0402742	rest	42.1444	47.5413	-5.39682	47.6728	55.0709	-7.39802
YER148W-A	5	465679	74.8362	39.2222	466260	ARS519.0	23660	same	0.5	leading	ND	ND	ND	ND	45.7661	46.3769	-0.610734	56.8751	48.9528	7.92223
YER147C-A	5	466107	75.3344	39.2129	465570	ARS519.0	22970	opposite	0.5	leading	ND	ND	ND	ND	44.3558	46.6603	-2.30454	57.5784	48.152	9.42639
YER150W	5	467844	75.2265	39.0548	468420	ARS520.0	-22980	opposite	0.6	lagging	SAGA-dominated	ND	ND	ND	45.2164	49.4861	-4.26964	51.1278	57.0252	-5.89746
YER149C	5	468032	73.7972	39.1265	467490	ARS520.0	-23910	same	0.6	lagging	TFIID-dominated	-0.193627	-0.388057	G1	46.7733	45.6196	1.15373	52.0163	56.8751	-4.85874
YER151C	5	473048	63.4891	37.6846	472500	ARS520.0	-18900	same	0.6	lagging	TFIID-dominated	-0.196581	0.444581	rest	40.6777	42.901	-2.2233	54.0482	54.1801	-0.131808
YER152W-A	5	472979	63.4891	37.2404	473550	ARS520.0	-17850	opposite	0.6	lagging	ND	ND	ND	ND	39.1445	38.0268	1.11768	46.4619	52.7066	-6.24465
YER152C	5	474482	64.8702	36.9999	473940	ARS520.0	-17460	same	0.6	lagging	TFIID-dominated	ND	ND	ND	39.1582	39.3289	-0.170737	45.5825	52.2498	-6.66733
YER154W	5	474500	64.8702	36.4782	475080	ARS520.0	-16320	opposite	0.6	lagging	TFIID-dominated	ND	ND	ND	41.6112	40.4512	1.16005	50.8554	46.5594	4.29598
YER153C	5	475896	64.6834	36.4782	475350	ARS520.0	-16050	same	0.6	lagging	TFIID-dominated	-0.617252	0.482776	rest	42.2366	40.5818	1.65479	51.9526	51.0044	0.948206
YER155C	5	483616	50.8456	31.604	483060	ARS520.0	-8340	same	0.6	lagging	TFIID-dominated	0.351831	0.431725	rest	39.2376	38.7267	0.510944	47.8541	44.3458	3.50826
YER157W	5	484012	52.1975	31.0233	484590	ARS520.0	-6810	opposite	0.6	lagging	TFIID-dominated	ND	ND	ND	37.605	35.7727	1.83231	36.8946	37.0039	-0.109284
YER156C	5	484864	54.0699	31.2	484320	ARS520.0	-7080	same	0.6	lagging	TFIID-dominated	0.939173	0.460504	rest	38.1891	37.213	0.976088	44.8636	39.432	5.43167
YER158W-A	5	490981	0	29.7668	491550	ARS520.0	150	same	1	leading	ND	ND	ND	ND	39.2911	50.6037	-11.3127	0	0
YER158C	5	491344	0	29.8461	490800	ARS520.0	-600	same	0.6	lagging	SAGA-dominated	-0.394919	-0.636016	rest	37.4171	37.6148	-0.197704	40.6932	35.7255	4.96769
YER159C	5	492640	0	29.7291	492090	ARS520.0	690	opposite	1	leading	SAGA-dominated	0.79104	0.0364523	rest	18.1567	23.5123	-5.35556	0	0
YER161C	5	500888	37.8676	29.0817	500340	ARS520.1	140	opposite	0	leading	TFIID-dominated	-0.39371	-0.651078	rest	31.876	32.4106	-0.534644	31.132	37.352	-6.22002
YER162C	5	503424	41.7313	29.2346	502890	ARS520.4	-510	same	1	lagging	TFIID-dominated	-0.928127	-0.68517	rest	29.9539	31.9661	-2.01215	41.4755	30.314	11.1616
YER164W	5	504588	42.4521	29.3927	505170	ARS520.5	170	same	1	leading	TFIID-dominated	ND	ND	ND	37.6357	37.1184	0.51726	36.8912	42.0719	-5.18066
YER163C	5	504312	42.5463	29.2758	503760	ARS520.4	360	opposite	nd	leading	TFIID-dominated	0.50679	-0.218699	rest	33.6103	29.7114	3.89885	31.7495	40.2668	-8.51726
YER165W	5	509724	51.3507	29.4537	510300	ARS520.7	900	same	1	leading	TFIID-dominated	0.98304	1.28723	rest	34.4058	38.0097	-3.60386	34.7215	40.6672	-5.94575
YER166W	5	511876	51.8152	29.4995	512460	ARS521.0	660	same	0.714286	leading	TFIID-dominated	-0.14768	0.255279	rest	36.8054	38.3968	-1.59133	41.556	45.4375	-3.88158
YER165C-A	5	513477	50.8664	29.5452	512940	ARS521.0	1140	opposite	0.714286	leading	ND	ND	ND	ND	36.7159	39.1341	-2.41824	37.7432	47.2494	-9.50623
YER167W	5	517436	59.3031	29.8716	518010	ARS521.0	6210	same	0.714286	leading	TFIID-dominated	-0.251991	0.235096	rest	34.6876	39.3824	-4.69482	38.5759	43.0393	-4.46344
YER169W	5	522596	59.5756	30.8399	523170	ARS521.0	11370	same	0.714286	leading	TFIID-dominated	ND	ND	ND	38.6797	40.8232	-2.14352	47.2106	52.1023	-4.89168
YER168C	5	523216	61.4017	30.7178	522660	ARS521.0	10860	opposite	0.714286	leading	TFIID-dominated	0.196659	0.107089	rest	37.8338	39.8042	-1.97043	39.5445	45.0474	-5.50293
YER170W	5	525380	65.0449	31.5483	525960	ARS521.0	14160	same	0.714286	leading	TFIID-dominated	0.136623	0.276714	G1	37.9661	41.9659	-3.99976	43.109	45.643	-2.53394
YER171W	5	526428	64.7824	31.8594	527010	ARS521.0	15210	same	0.714286	leading	TFIID-dominated	0.13322	0.176961	rest	38.946	39.9252	-0.979193	43.9799	46.6104	-2.63053
YER173W	5	535780	57.4341	32.8997	536370	ARS522.0	-6230	opposite	0.5	lagging	TFIID-dominated	ND	ND	ND	41.6704	39.0138	2.65656	43.1901	40.8716	2.31849
YER172C	5	536584	57.725	32.8997	536040	ARS522.0	-6560	same	0.5	lagging	TFIID-dominated	-0.236708	0.0976745	rest	41.875	39.3246	2.55036	47.2201	43.7329	3.48726
YER172C-A	5	537149	58.2376	32.8408	536610	ARS522.0	-5990	same	0.5	lagging	ND	ND	ND	ND	40.3333	40.1055	0.227818	44.3484	43.5451	0.803337
YER175W-A	5	540144	51.7243	32.5308	540720	ARS522.0	-1880	opposite	0.5	lagging	ND	ND	ND	ND	36.9507	35.4167	1.53397	43.6718	40.4752	3.19655
YER175C	5	540872	49.0404	32.5503	540330	ARS522.0	-2270	same	0.5	lagging	SAGA-dominated	-0.237502	0.175762	rest	36.7933	34.158	2.63528	40.6127	36.0193	4.59333
YER176W	5	541148	49.0404	32.5065	541710	ARS522.0	-890	opposite	0.5	lagging	TFIID-dominated	-0.156105	0.425684	rest	38.0541	36.7368	1.31737	45.6447	39.5965	6.04826
YER177W	5	545068	41.587	32.6971	545640	ARS522.1	640	same	1	leading	SAGA/TFIID	1.69297	1.42358	rest	33.1216	35.4276	-2.30592	35.7956	41.3861	-5.59046
YER178W	5	546284	44.6493	32.8464	546870	ARS522.2	-130	opposite	0	lagging	TFIID-dominated	0.40029	0.858895	rest	29.3103	30.8216	-1.51124	37.1415	29.8722	7.26929
YER179W	5	548316	48.5902	33.2267	548880	ARS522.3	-920	opposite	0	lagging	TFIID-dominated	-0.507502	-0.545737	rest	33.5569	31.3228	2.23414	37.7695	32.2694	5.50011
YER180C	5	551021	44.357	33.6374	550470	ARS522.3	670	opposite	0	leading	TFIID-dominated	0.405073	-0.27593	rest	33.813	37.049	-3.23603	32.752	45.1804	-12.4284
YER182W	5	551980	46.7698	34.0689	552570	ARS522.4	1170	same	1	leading	TFIID-dominated	ND	ND	ND	34.7625	32.595	2.16757	36.014	36.5733	-0.559273
YER180C-A	5	551616	46.7698	33.7424	551070	ARS522.4	-330	same	nd	lagging	ND	0.113873	-0.907875	ND	36.2599	35.5337	0.726209	44.1099	35.0292	9.08072
YER181C	5	552290	47.706	33.8493	551760	ARS522.4	360	opposite	1	leading	ND	ND	ND	ND	34.6739	34.1707	0.503144	35.1867	39.425	-4.23832
YER183C	5	554472	47.1818	34.394	553920	ARS522.4	2520	opposite	1	leading	TFIID-dominated	-0.0920088	-0.409783	rest	34.5271	34.7061	-0.178953	38.2388	37.0924	1.14637
YER185W	5	558804	46.3981	34.6535	559380	ARS522.6	-420	opposite	0.5	lagging	SAGA/TFIID	ND	ND	ND	32.6887	33.6376	-0.948873	35.284	35.6748	-0.390757
YER184C	5	559552	45.4537	34.6535	559020	ARS522.6	-780	same	0.5	lagging	TFIID-dominated	-0.516238	-0.250511	rest	34.6884	32.1861	2.50236	37.8887	32.1585	5.73022
YER186C	5	563248	39.245	34.4512	562710	ARS523.0	-290	same	1	lagging	TFIID-dominated	-0.107127	-0.143426	rest	33.5063	33.0609	0.445446	38.6996	30.9331	7.76657
YFL068W	6	1	0	49.3312	121	ARS600.1.0	-5679	opposite	0.5	lagging	TFIID-dominated	ND	ND	ND	0	0		0	0
YFL067W	6	335	0	49.5197	900	ARS600.1.0	-4900	opposite	0.5	lagging	TFIID-dominated	ND	ND	ND	0	0		0	0
YFL066C	6	3114	R	49.7312	2580	ARS600.1.0	-3220	same	0.5	lagging	TFIID-dominated	ND	ND	ND	0	0		0	0
YFL065C	6	3837	R	49.792	3300	ARS600.1.0	-2500	same	0.5	lagging	TFIID-dominated	ND	ND	ND	0	0		0	0
YFL063W	6	4565	0	49.736	5130	ARS600.1.0	-670	opposite	0.5	lagging	ND	ND	ND	ND	43.0118	42.6708	0.341011	57.182	56.0193	1.16266
YFL064C	6	4345	R	49.7936	3810	ARS600.1.0	-1990	same	0.5	lagging	TFIID-dominated	-1.44963	-1.20702	G1	51.8736	49.1565	2.71709	0	0
YFL062W	6	5925	0	49.4938	6510	ARS600.1.0	710	same	1	leading	TFIID-dominated	-0.747627	-0.899842	rest	0	0		0	0
YFL061W	6	9044	R	48.43	9630	ARS600.1.0	3830	same	1	leading	SAGA/TFIID	ND	ND	ND	0	0		0	0
YFL059W	6	10862	R	47.3586	11430	ARS600.2.0	-3970	opposite	0.5	lagging	SAGA/TFIID	ND	ND	ND	0	0		0	0
YFL060C	6	11468	R	47.6424	10920	ARS600.2.0	-4480	same	0.5	lagging	SAGA/TFIID	ND	ND	ND	0	0		0	0
YFL058W	6	12428	55.9124	46.5031	12990	ARS600.2.0	-2410	opposite	0.5	lagging	TFIID-dominated	ND	ND	ND	46.3012	42.5712	3.73002	45.1516	42.6148	2.53681
YFL057C	6	15262	45.8975	45.4817	14730	ARS600.2.0	-670	same	0.5	lagging	TFIID-dominated	ND	ND	ND	41.6263	38.5356	3.09067	43.9581	40.0558	3.90228
YFL055W	6	16180	48.2961	44.8484	16770	ARS600.2.0	1370	same	0.5	leading	TFIID-dominated	ND	ND	ND	37.4675	37.3243	0.143224	38.3747	37.6033	0.771418
YFL056C	6	16960	50.7595	44.8484	16410	ARS600.2.0	1010	opposite	0.5	leading	TFIID-dominated	-0.249927	0.196839	rest	38.3004	40.8515	-2.55111	37.9041	40.893	-2.98881
YFL053W	6	22922	54.273	43.7601	23490	ARS600.4.2	-710	opposite	0	lagging	ND	ND	ND	ND	40.7563	38.8906	1.86564	42.2503	39.3143	2.93596
YFL052W	6	27716	56.1046	44.0008	28290	ARS601.0	-1110	opposite	0.5	lagging	ND	-1.30121	-0.482599	rest	39.4727	37.7744	1.69825	40.2551	41.3242	-1.06905
YFL054C	6	28384	57.3479	44.0008	27840	ARS601.0	-1560	same	0.5	lagging	SAGA-dominated	-1.17723	-0.327878	rest	41.1998	38.991	2.20884	44.0584	43.0056	1.05275
YFL051C	6	31039	56.3347	43.596	30480	ARS601.1	480	opposite	0	leading	TFIID-dominated	-1.03204	-0.897942	rest	36.0995	37.8952	-1.79572	41.7234	39.2736	2.44978
YFL049W	6	36196	61.5247	42.4421	36780	ARS602.1	-1220	opposite	0.5	lagging	TFIID-dominated	ND	ND	ND	44.0469	42.714	1.33294	47.1733	45.635	1.53836
YFL050C	6	37088	60.6396	42.4421	36540	ARS602.1	-1460	same	0.5	lagging	TFIID-dominated	-0.480945	-0.712794	rest	41.1854	39.4682	1.71715	43.7348	42.3626	1.37221
YFL047W	6	39924	65.4407	42.8101	40500	ARS602.2	700	same	ND	leading	TFIID-dominated	ND	ND	ND	40.8742	43.5182	-2.64392	47.3903	47.3049	0.0854246
YFL048C	6	40712	67.9911	42.7169	40170	ARS602.2	370	opposite	ND	leading	TFIID-dominated	0.25879	0.104116	rest	41.751	44.1171	-2.36612	45.2358	45.819	-0.583179
YFL046W	6	42244	65.8771	43.2422	42810	ARS602.3	-190	opposite	0	lagging	TFIID-dominated	0.51354	0.251998	rest	44.6821	44.2789	0.403168	49.3762	47.3339	2.04233
YFL044C	6	46088	59.0017	43.761	45540	ARS602.4	-660	same	1	lagging	TFIID-dominated	0.450123	0.651131	M/G1	46.3383	42.5512	3.78716	51.0234	49.5371	1.48626
YFL041W-A	6	47340	59.7449	43.9595	47910	ARS602.5	510	same	0.75	leading	ND	ND	ND	ND	43.4519	44.8609	-1.40898	52.9955	53.2723	-0.276822
YFL042C	6	48288	61.0528	43.9334	47730	ARS602.5	330	opposite	0.75	leading	TFIID-dominated	-1.03388	-0.292985	rest	43.1907	45.8019	-2.61121	50.6823	51.5517	-0.86941
YFL041W	6	48612	61.4833	43.9777	49200	ARS602.5	1800	same	0.75	leading	TFIID-dominated	-0.518752	-0.105098	rest	43.1824	45.3455	-2.16309	44.9215	48.8925	-3.97101
YFL040W	6	50849	68.1633	43.5583	51420	ARS602.5	4020	same	0.75	leading	ND	-0.499794	-0.436415	rest	42.9715	44.1134	-1.14189	45.7525	44.4245	1.328
YFL039C	6	55328	58.8019	41.2618	54780	ARS603.0	-5020	same	0.5	lagging	TFIID-dominated	1.61059	1.84309	rest	43.2104	42.1519	1.0585	50.8112	49.6057	1.20548
YFL037W	6	55764	57.4087	40.4258	56340	ARS603.0	-3460	opposite	0.5	lagging	TFIID-dominated	ND	ND	ND	40.2197	37.9968	2.22286	36.7652	41.0453	-4.28013
YFL038C	6	56536	54.544	40.4258	55980	ARS603.0	-3820	same	0.5	lagging	TFIID-dominated	0.58354	0.694709	rest	42.687	40.7414	1.94558	46.0033	44.7622	1.24107
YFL036W	6	58044	51.0884	38.564	58620	ARS603.0	-1180	opposite	0.5	lagging	TFIID-dominated	-0.130706	0.485056	rest	40.096	38.0867	2.00924	40.4121	40.6329	-0.220753
YFL034C-B	6	64552	42.4966	36.3414	64020	ARS603.1	220	opposite	0	leading	ND	ND	ND	ND	40.1739	38.8626	1.31126	39.9835	37.337	2.64655
YFL034W	6	64804	43.3398	36.2347	65370	ARS603.2	-830	opposite	0	lagging	TFIID-dominated	ND	ND	ND	36.2718	35.6246	0.647248	35.7414	35.726	0.0153727
YFL034C-A	6	65488	44.0971	36.2347	64950	ARS603.1	1150	opposite	0	leading	TFIID-dominated	2.33837	1.95658	ND	36.9268	37.9352	-1.00843	40.5109	40.6158	-0.104915
YFL032W	6	74369	52.316	38.8285	74940	ARS603.7	340	same	ND	leading	TFIID-dominated	ND	ND	ND	40.8051	39.5167	1.28848	49.518	49.6462	-0.128163
YFL031W	6	74676	52.0608	38.8285	75240	ARS603.8	-560	opposite	0	lagging	TFIID-dominated	ND	ND	ND	40.6828	39.0628	1.61997	49.0634	46.6759	2.38744
YFL033C	6	75144	52.0217	38.5184	74610	ARS603.7	10	opposite	ND	leading	ND	-0.7769	-0.258203	rest	39.159	39.9822	-0.823201	40.3477	42.192	-1.84434
YFL030W	6	76228	53.2636	39.808	76800	ARS603.9	-200	opposite	ND	lagging	TFIID-dominated	-0.135502	-0.253713	rest	44.6837	38.404	6.27966	47.1882	42.418	4.7702
YFL031C-A	6	76612	54.3401	39.4762	76080	ARS603.8	280	opposite	nd	leading	ND	ND	ND	ND	37.4711	41.6223	-4.15117	45.0099	48.7712	-3.76129
YFL029C	6	79704	61.6698	41.4741	79170	ARS603.10	170	opposite	0.285714	leading	ND	-0.831794	-0.262518	rest	40.0317	40.2302	-0.198455	42.5716	44.2036	-1.63199
YFL028C	6	80736	62.207	42.1161	80190	ARS603.10	1190	opposite	0.285714	leading	TFIID-dominated	-0.475002	0.0503624	rest	39.7404	40.4154	-0.675008	41.0477	43.6651	-2.6174
YFL026W	6	81572	61.2279	43.227	82140	ARS603.10	3140	same	0.285714	leading	TFIID-dominated	ND	ND	ND	39.5595	42.216	-2.65651	42.9222	42.3608	0.56144
YFL027C	6	82432	61.8875	43.227	81900	ARS603.10	2900	opposite	0.285714	leading	TFIID-dominated	0.406873	-0.703106	rest	42.4726	41.4976	0.97494	41.4139	45.3794	-3.96549
YFL025C	6	87816	64.7857	43.2594	87270	ARS603.10	8270	opposite	0.285714	leading	TFIID-dominated	0.341412	0.234958	rest	42.8679	44.3073	-1.43946	48.8139	46.9737	1.84013
YFL023W	6	90484	57.4692	40.7857	91050	ARS603.10	12050	same	0.285714	leading	TFIID-dominated	ND	ND	ND	42.1119	43.0351	-0.923278	49.8758	50.5401	-0.664339
YFL024C	6	91248	58.1954	41.1271	90690	ARS603.10	11690	opposite	0.285714	leading	ND	0.683623	0.740386	rest	40.9855	41.8059	-0.820342	53.2757	53.4521	-0.176395
YFL021W	6	95524	52.5764	38.1362	96090	ARS603.1.0	-10110	opposite	0.75	lagging	SAGA-dominated	ND	ND	ND	40.5871	37.8948	2.69237	40.7093	43.8938	-3.18451
YFL022C	6	95600	52.5764	38.5068	95070	ARS603.1.0	-11130	same	0.75	lagging	TFIID-dominated	0.517106	0.727875	rest	39.6216	41.0019	-1.38034	47.1641	49.6711	-2.50704
YFL021C-A	6	97112	47.3839	37.9736	96570	ARS603.1.0	-9630	same	0.75	lagging	ND	ND	ND	ND	41.5818	38.6853	2.89643	42.6195	44.7709	-2.15146
YFL020C	6	100092	43.5092	36.9864	99540	ARS603.1.0	-6660	same	0.75	lagging	TFIID-dominated	-1.41713	-1.37284	rest	36.8685	36.4795	0.388987	38.6084	39.0081	-0.39965
YFL019C	6	101098	43.3007	36.5448	100560	ARS603.1.0	-5640	same	0.75	lagging	TFIID-dominated	ND	ND	ND	40.7352	37.8083	2.92687	40.9179	37.492	3.42582
YFL017W-A	6	103148	40.3101	34.7748	103710	ARS603.1.0	-2490	opposite	0.75	lagging	ND	ND	ND	ND	36.8206	36.6227	0.197801	40.1278	36.5225	3.60531
YFL018C	6	103720	39.9417	35.1071	103170	ARS603.1.0	-3030	same	0.75	lagging	TFIID-dominated	0.133873	0.792832	rest	41.6429	38.7392	2.90376	45.7983	42.1438	3.65444
YFL017C	6	104992	39.8756	34.08	104460	ARS603.1.0	-1740	same	0.75	lagging	TFIID-dominated	ND	ND	ND	35.9068	33.5783	2.32852	40.5464	36.4982	4.04819
YFL015W-A	6	105908	39.3372	32.5936	106470	ARS603.1.0	270	same	0.625	leading	ND	ND	ND	ND	34.2868	36.4411	-2.1543	35.7121	36.8649	-1.15284
YFL014W	6	106708	38.8265	32.2019	107280	ARS603.1.0	1080	same	0.625	leading	ND	ND	ND	ND	32.6584	38.3815	-5.72308	36.2619	38.1131	-1.85121
YFL016C	6	106808	38.8879	32.9768	106260	ARS603.1.0	60	opposite	0.625	leading	TFIID-dominated	-0.181794	0.245708	rest	37.463	35.2392	2.2238	38.2512	40.6169	-2.36569
YFL013W-A	6	107292	39.0303	31.801	107880	ARS603.1.0	1680	same	0.625	leading	TFIID-dominated	ND	ND	ND	34.7888	37.8359	-3.04703	37.1523	41.4504	-4.29813
YFL015C	6	107456	39.0303	32.2019	106920	ARS603.1.0	720	opposite	0.625	leading	TFIID-dominated	ND	ND	ND	34.1352	36.9649	-2.82973	36.5719	37.3044	-0.732512
YFL012W-A	6	109303	34.4858	30.0986	109890	ARS603.1.0	3690	same	0.625	leading	ND	ND	ND	ND	27.4339	30.3092	-2.87525	26.3384	31.9171	-5.57877
YFL012W	6	110140	33.6082	29.1968	110730	ARS603.1.0	4530	same	0.625	leading	ND	ND	ND	ND	28.193	31.3508	-3.15787	27.0377	30.8645	-3.82683
YFL013C	6	110456	33.3434	29.6505	109920	ARS603.1.0	3720	opposite	0.625	leading	TFIID-dominated	-0.628349	-0.153413	rest	31.0466	35.895	-4.84847	33.6112	38.7599	-5.14869
YFL011W	6	111838	30.287	27.8321	112410	ARS603.5.0	-2990	opposite	0	lagging	TFIID-dominated	-1.44633	-1.02192	M/G1	31.6018	28.516	3.08584	35.4225	30.9406	4.48193
YFL010W-A	6	114483	42.034	25.3524	115050	ARS603.5.0	-350	opposite	0	lagging	ND	-0.49296	-0.221702	rest	28.4039	26.2813	2.12261	31.3882	30.7211	0.667114
YFL009W	6	115468	42.3641	24.6203	116040	ARS603.5.1	-560	opposite	0	lagging	TFIID-dominated	ND	ND	ND	25.4367	26.6062	-1.16949	27.9996	28.3067	-0.30715
YFL010C	6	116272	39.4152	24.9823	115740	ARS603.5.0	340	opposite	nd	leading	TFIID-dominated	-0.170794	-0.0527457	rest	25.2625	25.8736	-0.611048	29.5335	31.3259	-1.79239
YFL008W	6	118884	34.7529	22.5776	119460	ARS603.5.1	2860	same	nd	leading	SAGA-dominated	-0.232044	0.273425	G1	33.0734	30.2249	2.8485	36.0579	33.275	2.78291
YFL007W	6	122844	33.5913	21.6349	123420	ARS604.0	-380	opposite	0	lagging	TFIID-dominated	-0.204377	-0.347642	rest	29.7561	31.9796	-2.2235	33.2949	33.2236	0.0713358
YFL005W	6	129644	36.4788	25.8121	130230	ARS604.4	430	same	1	leading	TFIID-dominated	0.741173	0.0676054	rest	30.2086	28.9971	1.21152	31.7469	32.2299	-0.483011
YFL004W	6	131156	38.9886	26.358	131730	ARS604.5	330	same	1	leading	TFIID-dominated	0.447173	-0.18428	rest	27.2406	29.5732	-2.33258	27.8832	32.6005	-4.7173
YFL003C	6	136336	0	25.8852	135780	ARS605.2	380	opposite	0	leading	TFIID-dominated	-0.835427	-1.36724	rest	24.5156	26.1875	-1.67189	25.4894	30.6942	-5.20477
YFL001W	6	146596	47.4363	26.7739	147180	ARS605.5	580	same	0.5	leading	TFIID-dominated	ND	ND	ND	33.1587	35.7803	-2.62151	36.713	38.0287	-1.31569
YFL002C	6	147464	44.8191	26.7739	146910	ARS605.5	310	opposite	0.5	leading	TFIID-dominated	ND	ND	ND	33.3812	36.7596	-3.37838	37.2171	39.9099	-2.69282
YFR001W	6	148484	40.1676	26.8621	149070	ARS605.6	1270	same	1	leading	TFIID-dominated	0.594573	0.0359824	rest	34.7262	33.1915	1.53476	37.3979	37.7515	-0.353556
YFR002W	6	149492	39.4145	26.8274	150060	ARS605.7	-1340	opposite	0	lagging	TFIID-dominated	0.4871	0.434217	M	37.5521	34.3595	3.1926	38.5484	37.5516	0.996855
YFR004W	6	152844	40.6089	26.2491	153420	ARS605.7	2020	same	0.5	leading	TFIID-dominated	ND	ND	ND	31.5766	36.5872	-5.01052	35.1581	37.6148	-2.45673
YFR003C	6	153688	39.1613	26.2491	153150	ARS605.7	1750	opposite	0.5	leading	TFIID-dominated	0.11054	0.27142	rest	35.7442	37.2936	-1.54934	40.3732	39.9115	0.461684
YFR006W	6	155620	37.4628	24.9888	156210	ARS606.0	-4390	opposite	0	lagging	TFIID-dominated	ND	ND	ND	32.9698	30.1825	2.78729	37.0319	33.3867	3.64513
YFR005C	6	156472	34.5406	24.9888	155940	ARS605.7	4540	opposite	0.5	leading	TFIID-dominated	0.302248	-0.344214	rest	29.9242	32.8945	-2.97036	32.1486	34.8542	-2.70553
YFR007W	6	158772	38.3183	22.9767	159360	ARS606.0	-1240	opposite	0	lagging	TFIID-dominated	-0.178127	-0.496377	rest	31.7155	28.9517	2.76374	30.6039	30.7159	-0.111993
YFR008W	6	160004	35.9019	21.8662	160590	ARS606.0	-10	opposite	0	lagging	TFIID-dominated	ND	ND	ND	29.7323	30.467	-0.73474	34.8273	33.0726	1.75467
YFR009W	6	161981	R	20.5433	162570	ARS606.1	-30	opposite	0	lagging	TFIID-dominated	0.147723	-0.135213	rest	23.5142	24.4845	-0.97033	26.4115	24.1003	2.31119
YFR009W-A	6	163368	36.5648	19.9868	163950	ARS606.2	-250	opposite	0	lagging	ND	ND	ND	ND	22.1777	22.8362	-0.658506	24.3988	22.1643	2.2345
YFR010W	6	164484	31.1056	19.3017	165060	ARS606.2	860	same	1	leading	TFIID-dominated	0.31029	-0.0571061	rest	20.1088	21.3522	-1.2434	19.1534	22.1236	-2.97015
YFR010W-A	6	166220	27.8965	18.8264	166800	ARS606.3	-800	opposite	0	lagging	ND	ND	ND	ND	17.6952	0		20.9957	14.5212	6.47445
YFR012W	6	167380	33.3152	18.647	167970	ARS606.3	370	same	1	leading	SAGA/TFIID	ND	ND	ND	20.0108	19.4623	0.54851	19.0812	20.1726	-1.09142
YFR011C	6	167800	33.7833	18.7221	167250	ARS606.3	-350	same	0	lagging	TFIID-dominated	-0.0981269	-0.794236	rest	17.3794	12.7581	4.62133	20.4256	14.5917	5.83383
YFR012W-A	6	168715	34.1475	18.6014	169290	ARS606.4	-910	opposite	0	lagging	ND	-1.33546	-1.25917	ND	23.2076	23.32	-0.11239	27.0776	22.447	4.63059
YFR013W	6	169356	34.1182	18.6446	169920	ARS606.4	-280	opposite	0	lagging	TFIID-dominated	-0.517977	-0.297745	rest	32.0125	28.9123	3.10017	32.0269	31.0567	0.970243
YFR014C	6	174432	30.8964	19.9085	173880	ARS606.5	-1920	same	1	lagging	TFIID-dominated	-0.329877	-0.568024	rest	35.9036	28.3172	7.58637	39.0968	30.6708	8.42603
YFR015C	6	176992	40.6109	21.9067	176460	ARS606.6	-540	same	1	lagging	TFIID-dominated	-1.23409	-0.921835	M/G1	33.6903	34.1824	-0.492137	36.3982	33.9001	2.49816
YFR016C	6	181328	30.9517	24.7767	180780	ARS606.7	-2220	same	1	lagging	TFIID-dominated	-1.16251	-0.537054	rest	37.0334	34.104	2.92945	38.3139	36.4489	1.86505
YFR017C	6	183424	33.3704	25.1339	182880	ARS606.7	-120	same	1	lagging	SAGA-dominated	-1.179	-0.328416	rest	36.7795	37.523	-0.743494	42.9452	38.39	4.55523
YFR019W	6	183980	34.5843	24.6495	184560	ARS607.0	360	same	0.5	leading	TFIID-dominated	ND	ND	ND	29.9816	30.2306	-0.249002	33.7368	34.4277	-0.690876
YFR018C	6	184784	36.2761	24.6495	184230	ARS607.0	30	opposite	0.5	leading	TFIID-dominated	-0.739027	-0.255228	rest	34.782	36.1715	-1.38945	37.5283	39.6534	-2.12516
YFR020W	6	192225	29.1504	14.0706	192810	ARS607.1	-3590	opposite	0	lagging	TFIID-dominated	ND	ND	ND	28.1782	29.3943	-1.21611	31.1101	24.9993	6.11082
YFR021W	6	194204	27.9094	12.909	194790	ARS607.1	-1610	opposite	0	lagging	TFIID-dominated	-0.103419	-0.372083	rest	22.9007	20.6505	2.25013	20.7284	20.4203	0.308011
YFR022W	6	196068	32.8344	12.8211	196650	ARS607.1	250	same	1	leading	SAGA/TFIID	-0.650564	-0.830079	rest	10.5608	15.6547	-5.09396	12.0056	11.0655	0.940128
YFR023W	6	199780	30.2866	13.6626	200370	ARS607.3	1770	same	1	leading	ND	-1.07625	-1.37026	rest	19.3808	21.1097	-1.72889	19.4843	20.6384	-1.15403
YFR024C-A	6	203952	27.9111	14.3149	203400	ARS607.4	400	opposite	0	leading	TFIID-dominated	-0.629527	-0.426381	rest	22.7407	29.5779	-6.83718	24.9947	23.6785	1.31626
YFR025C	6	205272	30.1245	14.7119	204720	ARS607.4	1720	opposite	0	leading	TFIID-dominated	-0.358727	-0.336311	rest	24.8608	31.6325	-6.77162	25.2363	31.3594	-6.12311
YFR027W	6	206748	34.7285	15.6782	207330	ARS608.0	-2070	opposite	0.5	lagging	TFIID-dominated	ND	ND	ND	35.2561	34.1473	1.10877	35.9375	32.9311	3.00641
YFR026C	6	207760	35.9049	15.6782	207210	ARS608.0	-2190	same	0.5	lagging	TFIID-dominated	-0.793794	-0.448677	rest	33.7685	28.4192	5.34929	35.8567	30.6958	5.16084
YFR029W	6	210356	32.9127	18.0898	210930	ARS608.1	-470	opposite	0	lagging	TFIID-dominated	ND	ND	ND	33.9486	30.7873	3.16135	34.9263	33.4944	1.43193
YFR028C	6	210592	33.9577	17.644	210060	ARS608.0	660	opposite	nd	leading	TFIID-dominated	-0.0415019	0.175223	rest	29.433	33.2418	-3.80885	30.5157	32.3398	-1.82418
YFR030W	6	212692	37.4692	20.8627	213270	ARS608.1	1870	same	nd	leading	TFIID-dominated	-0.774182	0.129644	S	28.48	28.0618	0.418174	31.0742	34.089	-3.01484
YFR031C	6	220632	47.8185	31.3767	220080	ARS608.2	-2520	same	1	lagging	TFIID-dominated	0.234623	0.196914	rest	36.6944	32.5354	4.15904	37.4759	34.2941	3.18177
YFR031C-A	6	221960	46.2941	32.7174	221430	ARS608.2	-1170	same	1	lagging	TFIID-dominated	1.04257	1.12487	rest	37.5468	36.0525	1.49436	37.5343	41.3489	-3.8146
YFR032C	6	223446	47.0805	34.3952	222900	ARS608.2	300	opposite	0	leading	ND	0.708173	0.259906	rest	31.2381	30.1678	1.07028	37.9125	28.8486	9.06391
YFR032C-A	6	223924	48.5857	34.8586	223380	ARS608.2	780	opposite	0	leading	TFIID-dominated	2.31587	2.33145	ND	33.6516	37.1399	-3.48832	40.352	35.4957	4.85629
YFR032C-B	6	224460	51.1078	35.275	223920	ARS608.2	1320	opposite	0	leading	ND	2.07337	0.842841	ND	32.7759	33.6279	-0.852	41.9833	38.2536	3.72968
YFR034W-A	6	225509	52.815	36.5245	226080	ARS608.3	680	same	0.625	leading	ND	ND	ND	ND	35.4	39.8686	-4.46853	44.5425	43.5535	0.989011
YFR036W	6	226420	56.3037	36.9402	227010	ARS608.3	1610	same	0.625	leading	TFIID-dominated	ND	ND	ND	38.6843	42.2524	-3.56812	45.5939	52.7563	-7.16238
YFR036W-A	6	226937	58.1895	37.1035	227520	ARS608.3	2120	same	0.625	leading	ND	ND	ND	ND	42.0097	41.5333	0.476459	47.6029	52.5601	-4.95719
YFR035C	6	226952	58.1895	36.7477	226410	ARS608.3	1010	opposite	0.625	leading	TFIID-dominated	0.455373	-0.631271	rest	35.4652	40.0312	-4.56598	43.9503	44.3815	-0.431298
YFR038W	6	228860	61.35	37.4839	229440	ARS608.3	4040	same	0.625	leading	TFIID-dominated	ND	ND	ND	39.7031	39.6428	0.0602799	44.6841	47.5222	-2.83814
YFR037C	6	229712	62.1929	37.4839	229170	ARS608.3	3770	opposite	0.625	leading	TFIID-dominated	-0.288627	0.597045	rest	41.8026	41.3538	0.448789	49.2368	52.1054	-2.86851
YFR040W	6	233428	64.713	37.2293	234000	ARS608.3	8600	same	0.625	leading	TFIID-dominated	ND	ND	ND	41.0956	42.7741	-1.67852	47.489	47.4696	0.0194255
YFR039C	6	234168	65.719	37.2293	233610	ARS608.3	8210	opposite	0.625	leading	TFIID-dominated	-0.189627	0.0802041	M	41.8508	41.8914	-0.040564	48.091	48.6774	-0.586416
YFR042W	6	237908	62.0413	37.6093	238470	ARS608.5.0	-7330	opposite	0.5	lagging	TFIID-dominated	ND	ND	ND	43.8062	43.1389	0.667288	53.6762	49.5096	4.16662
YFR041C	6	238784	61.2222	37.6093	238230	ARS608.5.0	-7570	same	0.5	lagging	TFIID-dominated	0.145373	0.107655	rest	43.9838	43.1523	0.831458	48.193	46.0577	2.1353
YFR045W	6	241420	59.9184	39.1134	242010	ARS608.5.0	-3790	opposite	0.5	lagging	TFIID-dominated	ND	ND	ND	41.9858	44.0688	-2.08299	51.1047	52.4403	-1.33561
YFR044C	6	241960	59.4722	38.8504	241410	ARS608.5.0	-4390	same	0.5	lagging	TFIID-dominated	-0.334189	-0.0135081	rest	44.9124	42.4313	2.4812	51.254	48.6427	2.61127
YFR048W	6	245580	62.4608	41.1964	246150	ARS608.5.0	350	same	1	leading	TFIID-dominated	ND	ND	ND	38.51	43.56	-5.05	43.4775	43.5068	-0.0293391
YFR047C	6	245696	61.8391	40.9817	245160	ARS608.5.0	-640	same	0.5	lagging	TFIID-dominated	-0.317527	0.177006	rest	44.3312	40.3656	3.96565	47.4903	46.4124	1.07795
YFR049W	6	247836	58.8763	41.8673	248400	ARS608.5.0	2600	same	1	leading	TFIID-dominated	0.380206	0.239392	rest	39.0413	41.3677	-2.32643	42.8603	43.3092	-0.448891
YFR050C	6	250424	52.4283	42.0132	249870	ARS608.5.1	-1530	same	1	lagging	TFIID-dominated	0.848248	0.532934	rest	41.0742	41.7417	-0.667466	42.1789	42.0269	0.151979
YFR052W	6	251956	48.6239	42.2301	252540	ARS608.5.1	1140	same	0.333333	leading	TFIID-dominated	ND	ND	ND	37.7393	34.0163	3.72302	35.7716	36.0521	-0.280529
YFR051C	6	252336	48.3113	42.169	251790	ARS608.5.1	390	opposite	0.333333	leading	TFIID-dominated	0.197123	0.854794	rest	39.7582	40.1348	-0.376542	41.2798	41.4884	-0.208573
YFR052C-A	6	254220	45.6839	42.5122	253680	ARS608.5.1	2280	opposite	0.333333	leading	ND	ND	ND	ND	37.709	37.8149	-0.105891	34.1228	37.0291	-2.90622
YFR053C	6	255535	47.115	42.8099	255000	ARS609.0	-1200	same	1	lagging	SAGA-dominated	-0.686564	-0.350849	rest	38.0496	36.3849	1.66472	38.1943	37.3612	0.833111
YFR054C	6	259919	59.8563	45.7534	259380	ARS609.1	1580	opposite	0	leading	ND	ND	ND	ND	36.5563	38.8666	-2.31029	33.3398	37.4259	-4.08616
YFR055W	6	263644	63.7825	48.573	264210	ARS610.0	810	same	0.5	leading	SAGA-dominated	0.683873	0.0855251	rest	41.463	41.3836	0.0793817	42.9991	40.3372	2.66182
YFR056C	6	264811	69.3779	48.573	264270	ARS610.0	870	opposite	0.5	leading	SAGA-dominated	ND	ND	ND	42.5992	41.4147	1.18452	44.6697	42.1268	2.5429
YGL263W	7	2276	0	36.9595	2850	ARS700.5.0	-15350	opposite	0.222222	lagging	ND	ND	ND	ND	0	0		0	0
YGL262W	7	4811	96.0247	36.3287	5400	ARS700.5.0	-12800	opposite	0.222222	lagging	ND	ND	ND	ND	0	0		0	0
YGL260W	7	6359	R	35.7794	6930	ARS700.5.0	-11270	opposite	0.222222	lagging	TFIID-dominated	ND	ND	ND	0	0		0	0
YGL261C	7	7151	68.5735	35.981	6600	ARS700.5.0	-11600	same	0.222222	lagging	SAGA/TFIID	ND	-1.89835	rest	0	0		0	0
YGL259W	7	7969	65.6703	35.0577	8550	ARS700.5.0	-9650	opposite	0.222222	lagging	TFIID-dominated	ND	ND	ND	43.2337	39.6054	3.62829	47.2397	46.4271	0.812678
YGL258W-A	7	8661	56.6223	34.7801	9240	ARS700.5.0	-8960	opposite	0.222222	lagging	ND	-0.638002	-0.840896	ND	44.182	43.4471	0.734864	49.6455	49.7798	-0.134314
YGL258W	7	10609	R	33.554	11190	ARS700.5.0	-7010	opposite	0.222222	lagging	TFIID-dominated	-0.848327	-1.01221	rest	42.6212	40.9023	1.71891	46.2287	41.4593	4.76948
YGL256W	7	14124	48.4961	31.8714	14700	ARS700.5.0	-3500	opposite	0.222222	lagging	TFIID-dominated	ND	ND	ND	40.4233	36.9469	3.4764	51.2743	34.259	17.0154
YGL257C	7	14792	49.8153	31.8714	14250	ARS700.5.0	-3950	same	0.222222	lagging	TFIID-dominated	-0.0158412	0.186884	rest	38.7122	33.285	5.42715	43.5742	38.6342	4.94
YGL255W	7	18404	41.3091	32.7358	18990	ARS700.5.0	790	same	0.777778	leading	SAGA/TFIID	-0.0994451	-0.0872564	M	37.9165	37.5088	0.407675	34.5392	45.5368	-10.9975
YGL254W	7	21804	48.8518	34.2254	22380	ARS700.5.0	4180	same	0.777778	leading	TFIID-dominated	ND	ND	ND	37.1876	35.7463	1.4413	36.1361	39.4074	-3.27122
YGL253W	7	23396	47.0778	34.5927	23970	ARS700.5.0	5770	same	0.777778	leading	TFIID-dominated	1.12675	1.78009	rest	38.8103	39.2198	-0.409523	41.6643	46.1275	-4.46318
YGL252C	7	28032	48.223	34.8085	27480	ARS700.5.0	9280	opposite	0.777778	leading	TFIID-dominated	0.0188731	0.187484	rest	41.8045	38.9175	2.88703	42.2776	44.9028	-2.62515
YGL251C	7	30768	54.246	34.8542	30210	ARS700.5.0	12010	opposite	0.777778	leading	TFIID-dominated	-0.470555	-0.426138	rest	39.091	43.066	-3.975	41.6679	45.8385	-4.17063
YGL250W	7	31380	56.3848	35.0544	31950	ARS700.5.0	13750	same	0.777778	leading	TFIID-dominated	ND	ND	ND	39.3084	40.786	-1.47753	44.1645	48.652	-4.48753
YGL249W	7	33468	55.1954	35.5492	34050	ARS700.5.0	15850	same	0.777778	leading	TFIID-dominated	-0.339294	-0.566894	rest	40.0912	43.5381	-3.44694	44.3742	45.0651	-0.690959
YGL248W	7	34996	55.9755	36.0341	35580	ARS700.5.0	17380	same	0.777778	leading	SAGA-dominated	-0.114827	0.0466258	rest	42.4993	46.2858	-3.7865	49.3416	53.3215	-3.97984
YGL247W	7	36420	56.4983	36.5495	36990	ARS700.5.0	18790	same	0.777778	leading	TFIID-dominated	ND	ND	ND	44.5748	45.8498	-1.27493	45.0339	50.5084	-5.47448
YGL245W	7	38500	63.3786	37.1828	39090	ARS702.0	-16710	opposite	0.363636	lagging	TFIID-dominated	ND	ND	ND	44.8458	41.9509	2.89483	51.5585	46.9814	4.5771
YGL246C	7	39328	63.0328	37.1828	38790	ARS702.0	-17010	same	0.363636	lagging	TFIID-dominated	0.550956	0.142735	rest	47.0913	44.2888	2.80244	52.5874	46.0766	6.51075
YGL244W	7	40940	60.0786	37.7054	41520	ARS702.0	-14280	opposite	0.363636	lagging	TFIID-dominated	-0.164064	0.214282	rest	46.9185	44.0499	2.86854	52.528	52.4197	0.108313
YGL243W	7	42772	60.031	37.772	43350	ARS702.0	-12450	opposite	0.363636	lagging	TFIID-dominated	ND	ND	ND	45.653	43.8908	1.76221	51.1934	46.701	4.49241
YGL241W	7	44916	54.9187	37.4841	45480	ARS702.0	-10320	opposite	0.363636	lagging	TFIID-dominated	ND	ND	ND	43.5656	40.2995	3.26606	49.6126	45.6976	3.91493
YGL242C	7	45760	55.5078	37.4841	45210	ARS702.0	-10590	same	0.363636	lagging	TFIID-dominated	-0.434502	-0.140387	rest	43.8582	41.3903	2.46788	50.0146	45.7412	4.27337
YGL240W	7	48092	58.8076	36.6287	48660	ARS702.0	-7140	opposite	0.363636	lagging	TFIID-dominated	-0.207127	-0.0372396	rest	42.1024	40.9226	1.17978	46.2997	38.1829	8.11674
YGL238W	7	49044	55.9733	36.3145	49620	ARS702.0	-6180	opposite	0.363636	lagging	TFIID-dominated	ND	ND	ND	42.7446	38.9325	3.81205	47.9963	42.215	5.7813
YGL239C	7	50244	49.8454	36.3145	49710	ARS702.0	-6090	same	0.363636	lagging	TFIID-dominated	ND	ND	ND	42.1321	39.1978	2.93432	46.6988	42.7154	3.98344
YGL237C	7	54104	39.49	35.0705	53550	ARS702.0	-2250	same	0.363636	lagging	TFIID-dominated	-0.157002	0.25108	rest	41.8923	40.8133	1.07905	50.4651	45.1762	5.28882
[truncated: 4,308 more rows]
