# Supplementary material for: The asymmetric distribution of RNA polymerase II and nucleosomes on replicated daughter genomes is caused by differences in replication timing between the lagging and the leading strand
Source: HighWire-hosted journal article supplement (doi:10.1101/gr.275387.121), 2022-01-18
Supplement: Supplemental_Table_S5.xlsx [file Supplemental_Table_S5.xlsx]

## Sheet: Table_S5_DNA synthesis rate per
Supplemental Table S5: average DNA synthesis rates per gene for lagging (lag) and leading (lead) copies in WT and mcm2-3A cells (shown in Figure 6D), derived from time courses in Supplemental Figure S10 and calculated as described in Supplemental Figure S11 and in the Data Analysis-DNA synthesis rates section of Supplemental Methods.
gene	Chr	promoter start (bp)	replication timing of W strand (Vasseur et al., 2016) (min)	gene start (bp)	gene end (bp)	replication origin (WT, Figure S10)	replication origin start (bp)	replication of W gene copy WT	lag DNA synthesis rate (average of 2 replicates) WT bp/min	lead DNA synthesis rate (average of 2 replicates) WT bp/min	lag DNA synthesis rate (average of 2 replicates) mcm2-3A bp/min	lead DNA synthesis rate (average of 2 replicates) mcm2-3A bp/min
YAL062W	1	30652	30.6397	30652	33112	ARS104.0.0	31600	lagging	93.6766	162.804	170.799	126.381
YAL055W	1	41660	31.5158	41660	42960	ARS105.0.0	42000	lagging	346.852	829.585		40.9741
YAL044C	1	58982	34.3563	57742	58982	ARS106.1.0	68800	leading		480.106		155.698
YAL017W	1	119362	32.4903	119362	124582	ARS107.0.1	110400	lagging	586.246	895.566	247.983	87.2974
YAL018C	1	120041	32.3305	118441	120041	ARS107.0.1	110400	lagging	100.804	477.66	96.6993	500.587
YAL016W	1	124298	31.9723	124298	126998	ARS107.5.1.0	137600	leading		176.584	117.445	157.911
YAL016C-B	1	124992	30.1272	124172	124992	ARS107.5.1.0	137600	leading		173.848	58.4511	ND
YAL016C-A	1	125569	29.8607	124629	125569	ARS107.5.1.0	137600	leading		163.058	86.4346	183.106
YAL015C	1	128574	31.4464	126614	128574	ARS107.5.1.0	137600	leading		156.241	295.093	78.2731
YAL013W	1	128738	31.4464	128738	130698	ARS107.5.1.0	137600	leading		559.553		144.419
YAL014C	1	129574	32.5906	128034	129574	ARS107.5.1.0	137600	leading		763.091		55.34
YAL012W	1	130202	34.349	130202	132222	ARS107.5.1.0	137600	leading		847.83		465.535
YAL011W	1	131698	33.7255	131698	134238	ARS107.5.1.0	137600	leading		330.886		204.542
YAL003W	1	141675	30.8039	141675	143295	ARS108.0.0	144000	leading		252.116		86.1108
YAL005C	1	142182	30.481	139242	142182	ARS107.5.1.1	140400	lagging	94.8112	65.3624	221.28	245.886
YAL002W	1	143098	31.598	143098	147738	ARS108.0.0	144000	lagging	616.198	343.016	462.345	756.876
YAR002W	1	151714	27.8243	151714	154114	ARS108.4.0	151600	lagging	235.986	81.8709	112.649	340.333
YAL001C	1	151710	27.8243	147390	151710	ARS108.2.0	148000	lagging	166.643	185.523	143.262	137.199
YAR003W	1	154434	25.9993	154434	156934	ARS108.4.1	152800	lagging	876.695	360.597	420.094	193.414
YAR002C-A	1	155262	27.149	153762	155262	ARS108.4.1	152800	lagging	1184.33	306.237	236.378	202.656
YAR015W	1	168754	31.6591	168754	170614	ARS109.2.1	167600	lagging	142.394	682.952		360.755
YAR014C	1	169526	33.1702	166486	169526	ARS109.2.1	167600	lagging	ND	55.5182	624.587	352.046
YAR018C	1	172222	26.4608	170102	172222	ARS109.3.2	171600	leading		520.711		906.039
YAR019W-A	1	174495	22.7784	174495	175475	ARS110.0.0	176000	leading		84.0964		282.568
YAR019C	1	175678	28.8946	172038	175678	ARS109.3.2	171600	lagging	852.743	234.642	659.071	395.608
YAR020C	1	177520	32.4982	176720	177520	ARS110.0.0	176000	lagging	304.751	293.069	180.324	386.281
YBL094C	2	44593	31.841	43633	44593	ARS201.5.3.0	28800	lagging	ND	ND		157.141
YBL092W	2	45044	32.0319	45044	46604	ARS201.5.3.0	28800	lagging	252.816	394.134		899.083
YBL093C	2	45512	32.8334	43992	45512	ARS201.5.3.0	28800	lagging	339.089	338.672		140.182
YBL091C-A	2	47672	32.7611	46392	47672	ARS202.1.0	63600	leading		340.635	291.842	227.143
YBL090W	2	48276	33.1218	48276	49556	ARS202.1.0	63600	leading		302.605	309.597	420.026
YBL091C	2	49168	33.4096	47088	49168	ARS202.1.0	63600	leading		290.179	384.894	209.133
YBL089W	2	49044	33.4096	49044	51164	ARS202.1.0	63600	leading		117.456	322.224	249.323
YBL088C	2	60144	32.4998	50784	60144	ARS202.1.0	63600	leading		624.512	595.718	410.069
YBL087C	2	61344	30.9672	59584	61344	ARS202.1.0	63600	leading		311.577		154.469
YBL085W	2	63036	28.783	63036	67056	ARS202.1.0	63600	lagging	176.93	110.375	ND	ND
YBL086C	2	63264	28.5842	61084	63264	ARS202.1.0	63600	leading		406.987		104.508
YBL084C	2	70064	31.7604	66904	70064	ARS202.3.0	66800	lagging	111.536	318.778	304.32	236.253
YBL083C	2	70634	31.6179	69574	70634	ARS202.3.0	66800	lagging	252.991	544.525	215.436	268.144
YBL081W	2	71060	31.6361	71060	73180	ARS202.3.0	66800	lagging	ND	566.686	134.716	305.32
YBL082C	2	71623	32.349	69623	71623	ARS202.3.0	66800	lagging	184.442	516.251	195.839	130.458
YBL016W	2	191953	29.9667	191953	193653	ARS207.1.7.1	191600	lagging	558.741	336.665	407.2	383.101
YBL017C	2	192294	30.8778	186654	192294	ARS207.1.7.1	191600	leading		238.049	805.604	130.628
YBL015W	2	193530	34.1936	193530	195990	ARS207.1.7.1	191600	lagging	192.655	279.476	567.163	60.8601
YBL013W	2	201514	29.8126	201514	203574	ARS207.5.0.0	198800	lagging	793.017	1720.96	599.737	385.091
YBL014C	2	202286	32.946	198806	202286	ARS207.5.0.0	198800	lagging	33.6761	114.927	270.444	1581.92
YBL011W	2	202939	33.534	202939	206079	ARS207.8.0.1	205600	leading		624.096		177.243
YBL012C	2	204309	34.1817	203269	204309	ARS207.8.0.1	205600	leading		345.091		80.735
YBL009W	2	206659	34.3204	206659	209439	ARS207.8.0.1	205600	lagging	409.656	310.947	716.827	589.899
YBL010C	2	207471	34.187	205731	207471	ARS207.8.0.1	205600	lagging	315.859	123.904	295.424	77.0435
YBL002W	2	235555	31.1435	235555	237275	ARS208.0.0	236000	lagging	163.986	192.282	87.139	109.42
YBL003C	2	236351	25.5778	234951	236351	ARS208.0.0	236000	leading		253.145		204.083
YBL001C	2	238151	27.7109	236771	238151	ARS208.1.0	238000	leading		78.4536		87.3057
YBR001C	2	241911	32.5432	238671	241911	ARS208.2.0	239200	lagging	314.363	278.796	363.783	944.551
YBR003W	2	242291	32.8289	242291	244491	ARS208.4.0	242800	lagging	389.423	112.687	1160.5	755.113
YBR002C	2	243103	31.402	241363	243103	ARS208.3.0	241600	lagging	309.707	ND	108.904	3120.56
YBR005W	2	245331	31.7664	245331	246811	ARS208.4.1	244400	lagging	ND	170.797	ND	163.835
YBR004C	2	246207	32.1775	244167	246207	ARS208.4.1	244400	lagging	178.444	298.151	317.783	193.288
YBR006W	2	246267	32.1775	246267	248727	ARS208.4.1	244400	lagging	1200.62	648.43	637.725	473.008
YBR013C	2	266378	32.2709	265358	266378	ARS210.5.0.0	267600	leading		143.334		305.592
YBR016W	2	269707	34.3871	269707	271007	ARS210.5.0.0	267600	lagging	69.4244	73.7675	397.53	1349.11
YBR015C	2	270167	34.9266	267447	270167	ARS210.5.0.0	267600	lagging	ND	1533.58	92.1984	108.306
YBR017C	2	274335	33.2617	270555	274335	ARS210.5.0.0	267600	lagging	72.4538	918.766	994.442	136.115
YBR018C	2	276026	32.3521	274286	276026	ARS210.5.0.0	267600	lagging	132.397	219.902		348.758
YBR042C	2	322167	34.9818	320347	322167	ARS211.1.0	322000	leading		427.331		632.544
YBR079C	2	398798	31.9394	395098	398798	ARS213.4.0	398000	leading		280.991	452.004	230.885
YBR081C	2	405886	30.3266	400986	405886	ARS213.4.0	398000	lagging	100.148	222.379	196.646	296.458
YBR083W	2	406834	30.9617	406834	410814	ARS214.0.0	407600	lagging	750.075	335.642	519.896	801.949
YBR082C	2	407774	29.9855	406314	407774	ARS214.0.0	407600	leading		1104.06		ND
YBR084W	2	410474	32.5914	410474	414274	ARS214.2.0	410400	lagging	135.556	1053.36	190.43	2057.11
YBR121C-A	2	482977	33.9047	482197	482977	ARS216.0.0	487600	leading		70.8108		ND
YBR121C	2	483860	32.42	481220	483860	ARS216.0.0	487600	leading		42.7585		82.031
YBR122C	2	485039	31.0993	483619	485039	ARS216.0.0	487600	leading		249.653		287.241
YBR124W	2	486000	31.8296	486000	486980	ARS216.0.0	487600	leading		412.988		ND
YBR123C	2	487255	26.5196	484535	487255	ARS216.0.0	487600	leading		502.68		528.778
YBR125C	2	489055	31.5429	486715	489055	ARS216.0.0	487600	lagging	522.347	22.8822	400.485	114.405
YBR126W-A	2	490343	33.3006	490343	491183	ARS216.1.1	491200	leading		449.335		170.062
YBR126W-B	2	490420	34.3181	490420	491200	ARS216.1.1	491200	leading		416.634		ND
YBR195C	2	612415	29.3088	610355	612415	ARS219.5.4.0	614000	leading		478.724	103.242	71.7365
YBR196C	2	614463	32.885	611943	614463	ARS219.5.4.0	614000	leading		83.1255	127.74	471.253
YBR196C-A	2	614667	32.885	613887	614667	ARS219.5.4.0	614000	lagging	1185.94	ND	79.3044	836.326
YBR196C-B	2	615124	33.6449	614384	615124	ARS219.5.5.0	615600	leading		298.409		167.674
YBR197C	2	616375	34.4899	614635	616375	ARS219.5.5.0	615600	leading		631.716		124.426
YBR199W	2	618315	33.8352	618315	620555	ARS219.5.5.0	615600	lagging	579.602	938.551	910.316	537.19
YBR202W	2	625187	32.7874	625187	628547	ARS221.0.0	624800	lagging	65.3727	141.504	547.61	1066.77
YBR201C-A	2	625543	34.0588	624063	625543	ARS221.0.0	624800	lagging	221.832	87.3636	137.69	2400.54
YCL054W	3	30932	34.3182	30932	34192	ARS304.3.0	30800	lagging	298.19	143.84	999.732	89.4287
YCL051W	3	35068	32.879	35068	37828	ARS304.5.0	35200	lagging	578.438	295.732		396.32
YCL052C	3	35952	32.9013	33872	35952	ARS304.5.0	35200	leading		908.329	1009.61	500.858
YCL048W-A	3	40916	33.4591	40916	41936	ARS305.1.0	42400	leading		ND	572.426	224.137
YCL049C	3	41304	33.4047	39464	41304	ARS305.0.0	39600	lagging	426.019	250.09		114.599
YCL048W	3	41664	33.2836	41664	43684	ARS305.1.0	42400	lagging	153.123	303.706	199.116	249.74
YCL047C	3	44952	30.1508	43372	44952	ARS305.1.0	42400	lagging	424.412	267.446	460.204	1557.04
YCL044C	3	48920	33.4623	46800	48920	ARS305.3.0	50400	leading		94.436	1200.06	208.722
YCL042W	3	50083	33.8711	50083	51063	ARS305.3.0	50400	lagging	551.98	ND		39.988
YCL043C	3	50720	34.4305	48520	50720	ARS305.3.0	50400	leading		328.605		164.47
YCL040W	3	50337	33.8711	50337	52477	ARS305.3.0	50400	lagging	626.396	444.219		299.337
YCL036W	3	58468	24.9742	58468	60948	ARS305.3.0	50400	lagging	371.123	320.426	840.769	867.778
YCL037C	3	59248	20.1	56728	59248	ARS305.3.0	50400	lagging	42.3283	62.2152	119.128	40.7893
YCL034W	3	61116	30.4211	61116	62876	ARS305.3.0	50400	lagging	659.529	123.881	97.3288	119.059
YCL035C	3	61736	33.6805	60576	61736	ARS305.3.0	50400	lagging	282.668	233.535	176.336	90.3187
YCL032W	3	62900	34.2064	62900	64820	ARS305.3.0	50400	lagging	58.6326	111.251		301.493
YCL033C	3	63784	33.8592	62584	63784	ARS305.3.0	50400	lagging	79.3184	99.7456		152.06
YCL030C	3	68888	28.4913	65648	68888	ARS306.3.1	76800	leading		964.423		63.8079
YCL028W	3	69588	26.3696	69588	71588	ARS306.3.1	76800	leading		170.189		1173.54
YCL029C	3	70480	25.8707	68360	70480	ARS306.3.1	76800	leading		79.8228		949.993
YCL027W	3	71302	29.4897	71302	73462	ARS306.3.1	76800	leading		117.941		138.537
YCL026C-B	3	74520	26.1343	73240	74520	ARS306.3.1	76800	leading		43.4096	308.298	156.604
YCL026C-A	3	75784	25.8883	74564	75784	ARS306.3.1	76800	leading		441.387	164.761	139.142
YCL012C	3	102281	31.1286	101201	102281	ARS307.1.0	106000	leading		122.764		552.494
YCL010C	3	104905	26.3633	103265	104905	ARS307.1.0	106000	leading		86.7855		177.477
YCL008C	3	107377	33.9738	105457	107377	ARS307.1.0	106000	lagging	674.132	780.806	506.85	387.36
YCL005W	3	107469	33.9738	107469	108989	ARS307.1.0	106000	lagging	1105.35	1001.24	580.944	219.503
YCL007C	3	107865	34.9283	106845	107865	ARS307.1.0	106000	lagging	645.002	601.418	561.702	120.422
YCR007C	3	128033	34.7879	125613	128033	ARS309.0.0	128000	leading		70.2594		168.942
YCR009C	3	132113	33.8133	130413	132113	ARS309.1.1	132400	leading		ND		213.182
YCR010C	3	133737	34.4745	131957	133737	ARS309.1.1	132400	lagging	708.485	306.437	334.971	626.398
YCR024C	3	162753	33.9647	160513	162753	ARS310.0.0	167600	leading		255.704		182.05
YCR049C	3	212812	33.8087	211732	212812	ARS314.5.0.1	212000	lagging	412.452	1454.98		278.331
YCR051W	3	213549	33.0158	213549	215009	ARS314.5.0.1	212000	lagging	260.991	348.219	244.16	159.072
YCR050C	3	214267	34.561	213327	214267	ARS314.5.0.1	212000	lagging	322.047	440.691	310.355	147.903
YCR052W	3	214381	34.561	214381	216761	ARS314.5.2.0	214400	lagging	248.227	337.887	67.4545	439.216
YCR054C	3	220665	33.3872	218105	220665	ARS314.5.3.0	219200	lagging	1878.06	821.276	478.32	ND
YCR060W	3	223877	31.6253	223877	224877	ARS315.1.0	224800	leading		ND		ND
YCR059C	3	224761	33.6385	223181	224761	ARS315.1.0	224800	leading		2258.91		1525.28
YCR061W	3	225013	34.1441	225013	227933	ARS315.2.0	226000	lagging	532.646	225.441	591.65	732.774
YDL141W	4	202308	34.9224	202308	205468	ARS409.0.1	204000	leading		571.338		420.44
YDL142C	4	203160	34.7652	201480	203160	ARS408.4.0	161200	lagging	402.88	538.777		236.4
YDL140C	4	211664	31.9986	205104	211664	ARS409.1.0	205600	lagging	232.283	697.625	331.995	354.568
YDL138W	4	212564	32.3277	212564	215884	ARS409.5.0	212800	lagging	ND	ND	92.5783	130.93
YDL139C	4	212592	32.3277	211152	212592	ARS409.4.0	211200	lagging	426.286	117.634	431.275	458.141
YDL081C	4	310712	33.4799	309592	310712	ARS412.0.0	310000	lagging	261.638	118.649		149.636
YDL080C	4	313160	30.5454	310360	313160	ARS412.0.0	310000	lagging	623.63	113.278	140.282	359.87
YDL078C	4	316952	32.3244	315072	316952	ARS412.1.1	317600	leading		151.719		161.808
YDL074C	4	326736	33.6471	323816	326736	ARS412.2.1	323600	lagging	83.9592	804.722	66.6464	255.796
YDL071C	4	331540	32.9683	330540	331540	ARS413.1.0	330000	lagging	914.575	515.703	476.538	228.58
YDL068W	4	332999	32.8832	332999	333959	ARS413.2.0	333600	leading		143.414		205.444
YDL025C	4	407904	33.1513	404984	407904	ARS414.0.0	408000	leading		46.4136		167.915
YDL022C-A	4	410553	34.879	409673	410553	ARS414.1.0	410400	leading		439.911		ND
YDL024C	4	410354	34.9349	408314	410354	ARS414.0.0	408000	lagging	30.7239	662.12		ND
YDL020C	4	417456	28.615	414836	417456	ARS414.2.1	414800	lagging	212.553	80.4502	61.232	104.685
YDL016C	4	426369	31.6242	425429	426369	ARS415.1.0	433200	leading		387.72		524.957
YDL014W	4	426716	29.9598	426716	428716	ARS415.1.0	433200	leading		408.783		70.4834
YDL015C	4	427431	29.6277	425871	427431	ARS415.1.0	433200	leading		312.653		696.246
YDL013W	4	428428	30.0924	428428	431148	ARS415.1.0	433200	leading		552.043		302.441
YDL007W	4	437508	30.7802	437508	439508	ARS415.1.3	437200	lagging	1131.14	486.688	97.4612	519.506
YDL007C-A	4	437321	30.7802	436441	437321	ARS415.1.3	437200	leading		ND	ND	ND
YDL006W	4	439068	33.9258	439068	440908	ARS415.1.3	437200	lagging	105.005	877.313	88.2837	302.593
YDL004W	4	442484	31.4552	442484	443884	ARS415.1.3	437200	lagging	73.249	198.386	153.63	162.38
YDL005C	4	442856	31.9572	440676	442856	ARS415.1.3	437200	lagging	676.22	633.154	41.8247	ND
YDL002C	4	448184	33.2576	446584	448184	ARS415.1.3	437200	lagging	93.4322	ND	ND	ND
YDR002W	4	452476	31.8353	452476	453956	ARS416.0.0	463200	leading		1297.01		1257.1
YDR001C	4	453224	32.8184	450024	453224	ARS416.0.0	463200	leading		85.1632		702.538
YDR003W	4	453619	33.4971	453619	454879	ARS416.0.0	463200	leading		94.1588		468.871
YDR004W	4	454724	33.535	454724	456864	ARS416.0.0	463200	leading		375.458		168.207
YDR003W-A	4	454279	33.7782	454279	455039	ARS416.0.0	463200	leading		1001.55		ND
YDR005C	4	458736	23.425	456536	458736	ARS416.0.0	463200	leading		473.852		280.379
YDR007W	4	461148	27.5703	461148	462948	ARS416.0.0	463200	leading		85.5291		113.592
YDR006C	4	461888	24.9983	458388	461888	ARS416.0.0	463200	leading		ND		ND
YDR009W	4	462748	21.9238	462748	465728	ARS416.0.0	463200	lagging	ND	ND	ND	ND
YDR008C	4	463099	21.8473	462119	463099	ARS416.0.0	463200	leading		206.563		442.656
YDR011W	4	465100	26.6524	465100	470720	ARS416.1.1	465200	lagging	258.066	420.61	285.651	493.924
YDR010C	4	465880	28.8906	464920	465880	ARS416.1.1	465200	lagging	576.81	453.279	153.599	569.605
YDR014W-A	4	477252	34.0783	477252	478432	ARS417.0.0	478400	leading		179.341		115.355
YDR015C	4	478696	34.0541	477836	478696	ARS417.0.0	478400	leading		119.343	2655.65	288.331
YDR016C	4	479289	33.847	478229	479289	ARS417.0.0	478400	lagging	266.491	432.311	3750.78	504.921
YDR017C	4	482881	30.8604	478841	482881	ARS417.0.2	480400	lagging	314.31	6001.98	3078.78	391.372
YDR026C	4	494913	33.8512	492333	494913	ARS417.4.1	490400	lagging	291.72	101.026	111.134	258.739
YDR027C	4	497937	34.4951	494517	497937	ARS417.4.1	490400	lagging	428.359	266.75		123.49
YDR029W	4	500597	33.2041	500597	501537	ARS417.5.0.0	506000	leading		201.27	320.796	406.985
YDR028C	4	501889	34.8044	497409	501889	ARS417.4.1	490400	lagging	236.115	209.188	221.749	275.502
YDR043C	4	544066	30.4774	542506	544066	ARS418.0.0	545600	leading		296.951		309.562
YDR044W	4	545910	34.1808	545910	547870	ARS418.0.0	545600	lagging	625.444	655.625	1737.52	940.713
YDR045C	4	548954	30.4906	547674	548954	ARS418.1.0	548800	leading		54.4908		84.4718
YDR047W	4	550926	32.0386	550926	553126	ARS418.3.0	553200	leading		312.278	510.947	455.53
YDR046C	4	551186	32.0386	548546	551186	ARS418.1.0	548800	lagging	473.83	87.6404	588.102	988.852
YDR049W	4	552726	33.6234	552726	555346	ARS418.3.0	553200	lagging	652.448	119.503	132.839	72.2013
YDR048C	4	553896	29.9168	552956	553896	ARS418.3.0	553200	lagging	309.29	63.0533	65.5122	72.2013
YDR050C	4	557010	33.5479	555510	557010	ARS418.5.0	556000	lagging	126.868	191.879	172.013	168.778
YDR051C	4	558602	33.8913	556922	558602	ARS418.5.0	556000	lagging	131.749	119.866	427.779	130.744
YDR053W	4	559747	30.986	559747	560767	ARS419.1.0	564000	leading		421.844		234.793
YDR052C	4	561274	30.1733	558214	561274	ARS418.5.0	556000	lagging	63.9638	103.095	369.883	202.817
YDR055W	4	562958	30.5612	562958	565158	ARS419.1.0	564000	lagging	ND	ND	ND	ND
YDR054C	4	563010	30.5612	560950	563010	ARS419.1.0	564000	leading		1381.54		1469.05
YDR217C	4	904036	34.5823	899376	904036	ARS427.5.0.2	900000	lagging	937.917	1200.09	101.898	236.543
YDR218C	4	905548	32.4594	903648	905548	ARS427.5.0.2	900000	lagging	1535.96	1495.91	ND	225.871
YDR221W	4	906816	33.4672	906816	909776	ARS427.5.1.0	908800	leading		358.715		627.839
YDR219C	4	907348	34.4534	905328	907348	ARS427.5.1.0	908800	leading		962.742	39.8852	154.603
YDR222W	4	909528	29.9356	909528	911568	ARS427.5.1.0	908800	lagging	139.962	172.653		479.824
YDR223W	4	911136	28.97	911136	913836	ARS428.0.0	912400	lagging	164.073	180.194	197.764	104.054
YDR224C	4	915332	34.9444	914072	915332	ARS428.1.0	914800	leading		210.696	60.6143	62.7539
YDR226W	4	915920	34.5388	915920	917420	ARS428.2.0	917200	leading		115.489	214.284	83.826
YDR227W	4	916952	34.9834	916952	921972	ARS428.2.0	917200	lagging	136.343	481.388	177.618	426.839
YDR229W	4	924184	28.4077	924184	926324	ARS428.2.1	918000	lagging	609.053	203.74		118.018
YDR228C	4	924396	28.4077	921796	924396	ARS428.2.1	918000	lagging	376.84	700.642		1005.62
YDR272W	4	1008448	32.3827	1008448	1010028	ARS430.0.0	1011200	leading		832.016		ND
YDR271C	4	1009262	32.9179	1008262	1009262	ARS430.0.0	1011200	leading		846.148		ND
YDR273W	4	1009400	32.9179	1009400	1011440	ARS430.0.0	1011200	leading		73.2002		261.278
YDR274C	4	1012456	33.0251	1011456	1012456	ARS430.1.0	1013200	leading		110.861		160.706
YDR281C	4	1022924	34.1675	1021604	1022924	ARS430.5.0.0	1022400	leading		42.8869		435.842
YDR294C	4	1052788	33.5401	1050288	1052788	ARS430.5.4.1	1046400	lagging	670.005	238.658		108.874
YDR336W	4	1144576	32.9868	1144576	1146216	ARS431.7.1.0	1150800	leading		263.166		272.227
YDR337W	4	1145768	33.7734	1145768	1147368	ARS431.7.1.0	1150800	leading		81.3691		242.83
YDR343C	4	1161814	32.4679	1159474	1161814	ARS432.2.0	1162000	leading		149.605		220.752
YDR344C	4	1162943	30.2285	1161863	1162943	ARS432.2.0	1162000	lagging	190.241	186.08		1449.81
YDR345C	4	1165188	34.0018	1162648	1165188	ARS432.2.0	1162000	lagging	165.461	104.97	417.52	300.004
YDR347W	4	1168568	30.6834	1168568	1170328	ARS432.5.1.1	1167200	lagging	483.239	591.382	685.839	1798.48
YDR346C	4	1169356	30.4723	1166816	1169356	ARS432.5.1.1	1167200	lagging	360.862	778.924	677.978	176.338
YDR503C	4	1456404	31.8548	1454764	1456404	ARS441.1.1	1450800	lagging	426.439	232.458	159.867	109.063
YDR506C	4	1462076	32.2302	1459496	1462076	ARS442.1.0	1462400	leading		597.001		410.2
YDR509W	4	1467718	34.2471	1467718	1468698	ARS442.4.1	1468800	leading		ND		76.1912
YEL054C	5	53792	33.8574	52352	53792	ARS507.0.0	55600	leading		317.478		347.459
YEL049W	5	63227	34.728	63227	64227	ARS507.3.0	62400	lagging	192.541	877.901	363.414	321.853
YEL048C	5	65664	33.543	63984	65664	ARS507.5.0	66000	leading		307.376	272.384	230.134
YEL036C	5	85280	30.8039	82840	85280	ARS508.0.1	83200	lagging	216.935	2846.85	ND	165.68
YEL034W	5	85175	31.2636	85175	86275	ARS508.1.0	84800	lagging	85.2748	201.589	113.14	ND
YEL033W	5	85678	31.3794	85678	86718	ARS508.2.0	87600	leading		109.861	ND	ND
YEL035C	5	86044	32.6339	84904	86044	ARS508.1.0	84800	lagging	61.6817	203.006	216.666	82.6048
YEL032W	5	86396	32.6339	86396	90176	ARS508.2.0	87600	lagging	412.889	535.296	ND	728.491
YEL034C-A	5	86714	33.9899	85474	86714	ARS508.2.0	87600	leading		186.47	ND	ND
YEL032C-A	5	87700	34.0477	86900	87700	ARS508.2.0	87600	leading		100.348	ND	641.332
YER009W	5	171564	28.3158	171564	172804	ARS511.2.1	169200	lagging	288.165	178.862		367.391
YER008C	5	172384	30.2489	167604	172384	ARS511.2.0	168000	lagging	1516.65	1265.45	77.4275	261.712
YER093C	5	348176	32.5884	343096	348176	ARS516.0.0	354000	leading		435.975	133.633	999.21
YER093C-A	5	348904	34.5721	347704	348904	ARS516.0.0	354000	leading		147.802		425.363
YER095W	5	349420	34.9359	349420	351520	ARS516.0.0	354000	leading		142.069		152.471
YER098W	5	354961	33.8611	354961	357861	ARS516.0.0	354000	lagging	348.797	223.886	360.945	449.851
YFL012W-A	6	109303	34.4858	109303	110303	ARS603.5.0.0	116800	leading		123.472	273.099	256.103
YFL012W	6	110140	33.6082	110140	111220	ARS603.5.0.0	116800	leading		ND	400.776	263.733
YFL013C	6	110456	33.3434	107716	110456	ARS603.5.0.0	116800	leading		192.986	279.661	321.887
YFL011W	6	111838	30.287	111838	114118	ARS603.5.0.0	116800	leading		183.252		238.258
YFL008W	6	118884	34.7529	118884	123364	ARS603.5.0.1	119200	lagging	257.107	95.214	590.891	300.377
YFL007W	6	122844	33.5913	122844	130124	ARS604.0.0	120800	lagging	342.403	956.497	332.922	323.502
YFR005C	6	156472	34.5406	154212	156472	ARS605.6.2	155600	leading		884.111	327.312	492.097
YFR009W	6	161981	34.6809	161981	164861	ARS606.0.0	161600	lagging	605.61	608.616	139.234	302.798
YFR010W	6	164484	31.1056	164484	166764	ARS606.3.0	167600	leading		266.236	724.495	415.065
YFR010W-A	6	166220	27.8965	166220	167040	ARS606.3.0	167600	leading		144.944		2697.33
YFR012W	6	167380	33.3152	167380	168620	ARS606.3.0	167600	lagging	290.711	197.03	386.164	152.003
YFR011C	6	167800	33.7833	166400	167800	ARS606.3.0	167600	leading		136.589	359.113	2312.72
YFR012W-A	6	168715	34.1475	168715	169435	ARS606.3.0	167600	lagging	457.923	790.636	146.716	805.482
YFR013W	6	169356	34.1182	169356	172516	ARS606.5.0	170800	lagging	270.352	246.879	147.324	201.209
YFR014C	6	174432	30.8964	172192	174432	ARS606.6.0	172400	lagging	ND	632.648	306.614	335.58
YFR016C	6	181328	30.9517	176868	181328	ARS606.6.0	172400	lagging	384.096	1305.33	113.033	309.462
YFR017C	6	183424	33.3704	182024	183424	ARS607.0.0	190000	leading		447.991		290.468
YFR019W	6	183980	34.5843	183980	191520	ARS607.0.0	190000	leading		560.764		460.53
YFR020W	6	192225	29.1504	192225	193545	ARS607.0.0	190000	lagging	135.754	345.169	209.093	117.698
YFR021W	6	194204	27.9094	194204	196484	ARS607.0.0	190000	lagging	207.776	132.513	212.67	159.744
YFR022W	6	196068	32.8344	196068	199288	ARS607.3.0	199600	leading		130.066		155.308
YFR023W	6	199780	30.2866	199780	201600	ARS607.3.1	200800	leading		105.529		170.324
YFR024C-A	6	203952	27.9111	201572	203952	ARS607.4.0	202000	lagging	133.661	951.379	82.8221	243.919
YFR025C	6	205272	30.1245	203532	205272	ARS607.4.0	202000	lagging	287.501	749.105	142.124	192.54
YFR027W	6	206748	34.7285	206748	208468	ARS608.0.0	207200	lagging	2474.77	1339.24	394.835	57.1785
YFR029W	6	210356	32.9127	210356	213076	ARS608.0.0	207200	lagging	246.003	246.967	2604.12	173.626
YFR028C	6	210592	33.9577	208292	210592	ARS608.0.0	207200	lagging	719.977	193.466	100.666	297.266
YGL182C	7	158101	34.8408	157141	158101	ARS707.0.0	162800	leading		89.7227		253.806
YGL122C	7	281058	32.7115	278698	281058	ARS714.1.0	276800	lagging	2061.57	298.939		145.461
YGL121C	7	281786	33.3571	280506	281786	ARS714.2.1	282800	leading		260.013		181.479
YGL115W	7	291422	33.3421	291422	293202	ARS714.3.1	287600	lagging	66.29	98.7399	217.783	82.761
YGL049C	7	410282	32.9022	406562	410282	ARS717.3.1	398800	lagging	307.38	1244.91	452.09	205.653
YGL047W	7	410998	31.7127	410998	412338	ARS717.3.1	398800	lagging	228.58	106.57		552.611
YGL048C	7	411834	32.0598	409854	411834	ARS717.3.1	398800	lagging	40.4602	137.13		235.285
YGL045W	7	413486	32.2378	413486	416006	ARS718.4.0	425200	leading		210.385		282.029
YGL043W	7	416966	30.4743	416966	418786	ARS718.4.0	425200	leading		110.579		349.471
YGL044C	7	417762	32.1722	415742	417762	ARS718.4.0	425200	leading		3459.29		71.3006
YGL012W	7	472318	33.5171	472318	474498	ARS719.0.0	477600	leading		300.67		296.439
YGL013C	7	472946	34.3211	468946	472946	ARS719.0.0	477600	leading		264.292		336.598
YGL009C	7	479234	32.8368	476034	479234	ARS719.0.0	477600	lagging	936.546	842.447		332.006
YGL007W	7	482764	32.6371	482764	483764	ARS719.4.0	485200	leading		342.488	165.301	273.073
YGL008C	7	483410	32.4855	479250	483410	ARS719.1.1	480000	lagging	1893.51	314.678	657.109	323.663
YGL007C-A	7	483531	32.4855	482811	483531	ARS719.4.0	485200	leading		296.964		236.174
YGL006W-A	7	484927	31.1076	484927	485667	ARS719.4.0	485200	lagging	141.146	194.682		272.921
YGL006W	7	485424	31.6542	485424	489584	ARS719.5.0	485600	lagging	405.217	159.164	849.232	453.684
YGL005C	7	491082	29.4448	489382	491082	ARS719.7.0	489200	lagging	324.128	95.4789	1480.46	86.2199
YGR002C	7	500434	33.2245	498114	500434	ARS720.0.1	502800	leading		328.679		316.031
YGR004W	7	502374	33.434	502374	504694	ARS720.0.1	502800	lagging	1442.85	29.247	679.328	86.6673
YGR006W	7	505566	32.5439	505566	507086	ARS720.1.0	505600	lagging	334.274	339.182	501.312	1133.17
YGR005C	7	506394	33.2	504474	506394	ARS720.1.0	505600	leading		1496.85	542.775	ND
YGR007W	7	506454	32.6189	506454	508214	ARS720.1.0	505600	lagging	80.1508	344.762	353.74	769.441
YGR008C	7	508978	31.7944	507838	508978	ARS720.1.0	505600	lagging	139.862	158.371		512.283
YGR010W	7	511048	31.6271	511048	512868	ARS720.5.0	512800	leading		ND		150.45
YGR009C	7	511570	33.17	508810	511570	ARS720.5.0	512800	leading		230.715		408.919
YGR011W	7	512000	33.4352	512000	512960	ARS720.5.0	512800	leading		ND		83.2595
YGR012W	7	512646	29.9914	512646	514506	ARS720.5.0	512800	lagging	721.474	119.477	1168.88	176.3
YGR013W	7	513998	30.0787	513998	516698	ARS720.5.1	514000	lagging	235.615	99.0428	53.4537	371.012
YGR039W	7	574391	33.7905	574391	575331	ARS722.0.0	576000	leading		1842.16		196.672
YGR040W	7	574902	34.0944	574902	577022	ARS722.0.0	576000	leading		538.642	473.197	137.819
YGR085C	7	649482	34.0675	648122	649482	ARS726.0.0	645200	lagging	237.298	300.633		179.035
YGR086C	7	651242	34.9203	649142	651242	ARS726.1.0	654000	leading		108.262		125.775
YGR111W	7	715262	34.6383	715262	717242	ARS728.3.0	716800	leading		62.8484		137.017
YGR190C	7	881165	28.484	880165	881165	ARS731.5.0.0	887200	leading		ND		474.782
YGR192C	7	884402	34.8732	882582	884402	ARS731.5.0.0	887200	leading		75.6647		80.1897
YGR193C	7	886354	30.8366	884254	886354	ARS731.5.0.0	887200	leading		202.703		158.92
YGR195W	7	888270	31.1991	888270	889830	ARS731.5.0.1	888800	lagging	133.105	275.929	113.327	84.9204
YGR194C	7	888362	31.1991	885842	888362	ARS731.5.0.0	887200	leading		138.143		99.6018
YHL028W	8	47716	33.0005	47716	50756	ARS804.4.0	50000	leading		244.458	24.06	598.797
YHL029C	8	48504	33.6026	45744	48504	ARS804.1.1	42000	lagging	282.669	266.375	93.5263	242.282
YHL025W	8	54293	32.9175	54293	56073	ARS804.7.0	54800	lagging	166.69	1331.66	132.805	124.603
YHL026C	8	54745	32.6374	53005	54745	ARS804.7.0	54800	leading		309.045	61.9326	109.001
YHL024W	8	55989	32.4936	55989	59169	ARS805.0.0	57200	lagging	482.723	850.878	437.234	78.3801
YHL023C	8	63113	29.6361	59013	63113	ARS805.0.0	57200	lagging	283.938	349.734	541.269	464.032
YHL022C	8	64654	31.3456	62834	64654	ARS805.1.0	62000	lagging	295.522	176.781		858.209
YHL021C	8	66409	27.2151	64269	66409	ARS805.1.0	62000	lagging	110.38	273.215	167.145	18.0235
YHL019W-A	8	67207	29.0913	67207	68427	ARS805.1.0	62000	lagging	ND	121.864	343.799	265.999
YHL020C	8	68033	33.896	66073	68033	ARS805.1.0	62000	lagging	588.065	689.464	216.406	135.451
YHR001W	8	105501	34.696	105501	107621	ARS805.5.1.0	102000	lagging	383.227	245.065	396.689	85.4445
YHR001W-A	8	107253	33.7925	107253	108573	ARS805.5.2.1	111200	leading		230.745		ND
YHR002W	8	108157	33.7769	108157	110077	ARS805.5.2.1	111200	leading		585.369		513.567
YHR003C	8	111833	30.7677	109813	111833	ARS805.5.2.1	111200	leading		436.963	260.983	331.463
YHR005C	8	115449	33.2399	113269	115449	ARS805.5.2.1	111200	lagging	68.6231	106.816		123.72
YHR005C-A	8	116441	33.8007	115261	116441	ARS805.7.0.0	116400	leading		121.647		12.9359
YHR006W	8	117269	33.7817	117269	119669	ARS805.7.0.1	117600	lagging	406.737	234.329	299.396	865.017
YHR010W	8	125965	33.8855	125965	127745	ARS807.0.1	127600	leading		2566.09		797.359
YHR009C	8	126425	33.0275	123845	126425	ARS807.0.1	127600	leading		160.769		408.692
YHR011W	8	127173	32.9837	127173	129233	ARS807.0.1	127600	lagging	224.594	155.004		232.958
YHR015W	8	134725	25.4966	134725	136565	ARS808.0.0	136800	leading		40.0609		112.417
YHR017W	8	138189	34.2747	138189	140029	ARS808.0.0	136800	lagging	664.369	412.726	231.83	90.4701
YHR016C	8	139001	34.7077	136541	139001	ARS808.0.0	136800	lagging	139.402	117.67	980.658	328.739
YHR027C	8	165273	34.1447	161453	165273	ARS809.1.0	163600	leading		592.692	146.605	138.358
YHR071C-A	8	239731	34.8387	238771	239731	ARS813.2.0	239200	lagging	481.395	ND	233.381	234.5
YHR072W-A	8	241092	31.3971	241092	242152	ARS813.3.1	242400	leading		109.099		87.0348
YHR073W	8	242083	33.2383	242083	245703	ARS813.3.1	242400	lagging	353.096	83.8427	596.337	259.506
YHR073W-A	8	242369	33.2383	242369	243169	ARS813.3.1	242400	lagging	268.816	407.015	726.967	254.183
YHR074W	8	245644	32.801	245644	248604	ARS813.5.0	246000	lagging	412.869	163.757	ND	83.1421
YHR073C-B	8	246003	33.1045	245283	246003	ARS813.5.0	246000	leading		347.366		599.824
YHR089C	8	283872	32.3757	282332	283872	ARS815.1.0	298800	leading		ND		91.1581
YHR091C	8	287304	34.8652	284644	287304	ARS815.1.0	298800	leading		163.777		240.584
YHR093W	8	288644	34.2393	288644	289824	ARS815.1.0	298800	leading		112.178		91.9641
YHR092C	8	289384	33.1865	286884	289384	ARS815.1.0	298800	leading		204.771		268.154
YHR095W	8	292445	27.0005	292445	293505	ARS815.1.0	298800	leading		194.314		160.515
YHR094C	8	293448	24.6316	290688	293448	ARS815.1.0	298800	leading		91.9584		256.78
YHR096C	8	297280	28.3611	294340	297280	ARS815.1.0	298800	leading		169.445		149.127
YHR097C	8	299200	30.7778	297220	299200	ARS815.1.0	298800	leading		223.072		179.055
YHR099W	8	302172	32.3137	302172	314192	ARS815.3.1	302400	lagging	401.527	183.24	352.914	135.507
YHR098C	8	302576	32.2147	298936	302576	ARS815.1.0	298800	lagging	291.594	107.369	535.711	242.365
YHR165W-A	8	436148	32.674	436148	437088	ARS820.0.0	438400	leading		218.897		63.64
YHR165C	8	437553	28.9794	429513	437553	ARS818.5.6.2	427200	lagging	223.38	150.575		220.363
YHR167W	8	438765	29.276	438765	440325	ARS820.0.0	438400	lagging	156.788	148.564		179.585
YHR166C	8	439649	32.3109	437029	439649	ARS820.0.0	438400	leading		291.333	455.772	75.9072
YHR168W	8	439701	32.3109	439701	442161	ARS820.1.0	440400	lagging	230.095	141.234	553.04	362.717
YHR169W	8	441637	33.4903	441637	443757	ARS820.1.0	440400	lagging	565.345	660.589	814.172	ND
YHR170W	8	443269	32.4411	443269	445649	ARS820.4.0	444400	lagging	155.822	121.837	388.813	119.931
YHR171W	8	445213	31.5666	445213	447813	ARS820.5.0	446000	lagging	313.317	130.097	179.542	254.527
YHR172W	8	447645	33.3446	447645	451425	ARS820.7.0	448400	lagging	154.254	238.209	312.314	139.942
YHR174W	8	450797	34.1415	450797	452897	ARS820.9.0	451200	lagging	30.9107	82.7213	706.74	58.6382
YHR173C	8	451652	31.675	450692	451652	ARS820.9.0	451200	leading		92.1896	656.029	56.4772
YHR175W	8	452371	32.4931	452371	453571	ARS820.10.0	453200	leading		ND		24.0897
YHR199C-A	8	499358	34.927	498438	499358	ARS822.1.0	500800	leading		192.585		147.657
YIL138C	9	90240	32.611	88760	90240	ARS908.1.0	81200	lagging	219.656	375.133		ND
YIL136W	9	93076	34.1926	93076	95096	ARS909.1.0	97200	leading		460.149		91.6584
YIL137C	9	93328	34.6331	89748	93328	ARS909.1.0	97200	leading		814.313		306.44
YIL102C-A	9	174144	29.3439	172084	174144	ARS911.5.6.0	172400	lagging	561.894	182.993	208.094	457.696
YIL102C	9	175383	32.047	174443	175383	ARS912.0.0	175200	leading		ND		ND
YIL079C	9	212544	34.6268	210664	212544	ARS913.2.0	211600	lagging	212.47	41.1873	45.2157	266.133
YIL076W	9	216124	31.2588	216124	217844	ARS913.6.0	217200	leading		ND		59.2767
YIL077C	9	217032	32.3072	214632	217032	ARS913.4.0	215200	lagging	135.665	222.943	285.304	270.939
YIL068C	9	236032	31.2311	232812	236032	ARS913.10.0	226800	lagging	952.434	731.886	558.611	306.285
YIL066W-A	9	236862	29.211	236862	237942	ARS913.5.0.0	243600	leading		ND		190.321
YIL067C	9	238312	32.4203	235532	238312	ARS913.5.0.0	243600	leading		77.0026	121.443	242.094
YIL066C	9	241204	27.8361	237964	241204	ARS913.5.0.0	243600	leading		594.265		400.472
YIL064W	9	241500	27.8361	241500	242900	ARS913.5.0.0	243600	leading		216.77		217.562
YIL065C	9	242320	32.4588	241060	242320	ARS913.5.0.0	243600	leading		202.199		240.426
YIL060W	9	245888	31.9587	245888	246948	ARS913.5.1.0	247200	leading		142.265	92.9454	99.0965
YIL061C	9	246096	31.6989	244356	246096	ARS913.5.1.0	247200	leading		123.916		339.893
YIL058W	9	246410	31.8959	246410	247330	ARS913.5.1.0	247200	leading		1067.75		531.319
YIL059C	9	247411	33.1916	246411	247411	ARS913.5.1.0	247200	leading		1067.75		602.051
YIL014C-A	9	326104	33.7292	325084	326104	ARS919.1.0	335600	leading		182.042		358.778
YIL013C	9	330896	33.6543	327876	330896	ARS919.1.0	335600	leading		429.582		225.781
YIL009C-A	9	336744	31.4106	335384	336744	ARS919.1.0	335600	lagging	352.469	325.37		81.6815
YIL008W	9	341932	29.2631	341932	343152	ARS919.3.1	342400	lagging	582.667	80.0381	313.227	169.216
YIL006W	9	343284	33.0529	343284	345504	ARS919.4.0	343200	lagging	897.263	271.451	165.039	142.837
YIL003W	9	348564	34.5659	348564	350204	ARS920.0.0	348400	lagging	68.1136	ND	277.416	337.943
YIL004C	9	349064	33.5885	347624	349064	ARS920.0.0	348400	leading		ND		ND
YIL002W-A	9	349756	31.8124	349756	350856	ARS920.0.0	348400	lagging	ND	ND	468	210.213
YIL002C	9	354120	34.587	350320	354120	ARS920.0.0	348400	lagging	2009.32	399.056	109.804	295.49
YIR001C	9	357672	32.3974	355672	357672	ARS920.1.1	355600	lagging	366.962	484.383	215.626	640.428
YIR003W	9	360244	34.3323	360244	363164	ARS920.4.0	360800	lagging	599.783	ND	130.311	60.32
YIR020W-A	9	394413	31.6069	394413	395293	ARS922.0.0	403600	leading		95.8478		ND
YIR020C	9	395053	29.675	394113	395053	ARS922.0.0	403600	leading		907.903		ND
YIR021W	9	396644	27.7919	396644	398604	ARS922.0.0	403600	leading		473.528		ND
YIR021W-A	9	398010	32.9928	398010	398850	ARS922.0.0	403600	leading		335.167		252.176
YIR020C-B	9	398445	32.8509	397085	398445	ARS922.0.0	403600	leading		ND		50.2606
YIR022W	9	398229	32.9928	398229	399369	ARS922.0.0	403600	leading		217.837		138.767
YIR023W	9	399228	30.8677	399228	402888	ARS922.0.0	403600	leading		131.012		266.028
YIR023C-A	9	403202	25.6065	402242	403202	ARS922.0.0	403600	leading		226.977		219.33
YIR025W	9	403084	26.6386	403084	405124	ARS922.0.0	403600	lagging	440.999	ND	314.604	517.313
YIR024C	9	403987	24.8451	402707	403987	ARS922.0.0	403600	leading		664.635	498.475	358.911
YIR026C	9	406552	26.7965	404572	406552	ARS922.1.1	406400	leading		439.171		389.242
YIR027C	9	407336	27.7846	406056	407336	ARS922.1.1	406400	lagging	420.089	80.7362	801.658	664.787
YIR028W	9	409508	30.791	409508	410628	ARS922.2.0	408800	lagging	56.2747	119.535		192.27
YIR029W	9	410172	27.5263	410172	411972	ARS922.3.0	411200	leading		185.851	147.824	195.038
YIR030W-A	9	412395	27.6736	412395	413415	ARS922.4.0	412400	lagging	282.519	274.291	297.373	97.9579
YIR030C	9	413312	31.3964	411752	413312	ARS922.4.0	412400	lagging	329.361	202.238	140.037	91.5754
YIR031C	9	415312	34.9612	412792	415312	ARS922.5.0	413600	lagging	330.496	265.63	259.127	178.124
YIR033W	9	415476	34.9612	415476	419696	ARS922.6.0	416400	lagging	707.546	36.4593		340.038
YIR034C	9	421304	29.514	419304	421304	ARS922.7.0	418000	lagging	141.483	199.338	275.064	274.964
YIR035C	9	422344	31.1669	420784	422344	ARS922.9.0	422400	leading		674.009		102.643
YIR036W-A	9	422131	31.1669	422131	423171	ARS922.9.0	422400	lagging	373.303	314.736	468.875	279.093
YIR037W	9	422624	32.7628	422624	423744	ARS922.10.0	423200	leading		ND	115.594	533.21
YJL200C	10	59432	33.5943	56152	59432	ARS1005.0.0	62000	leading		166.686	173.551	267.744
YJL198W	10	60300	34.3541	60300	63740	ARS1005.0.0	62000	lagging	281.568	283.765	252.175	17.7692
YJL197C-A	10	66584	33.7578	65664	66584	ARS1005.1.0	66000	lagging	496.799	190.838		75.7838
YJL178C	10	90624	33.0803	89064	90624	ARS1006.0.0	96400	leading		392.277		121.222
YJL175W	10	93546	27.1333	93546	94686	ARS1006.0.0	96400	leading		80.3547		451.108
YJL174W	10	94460	27.649	94460	96360	ARS1006.0.0	96400	leading		214.227		64.3742
YJL176C	10	95184	29.7043	91744	95184	ARS1006.0.0	96400	leading		139.31		169.195
YJL165C	10	110121	31.6189	106661	110121	ARS1007.1.0	108800	leading		329.41		181.74
YJL123C	10	189975	34.7811	187795	189975	ARS1008.0.1	190000	leading		447.781	206.997	166.791
YJL120W	10	190519	34.0134	190519	191479	ARS1008.0.1	190000	lagging	140.774	ND		ND
YJL118W	10	191115	33.477	191115	192595	ARS1008.0.1	190000	lagging	388.408	71.1151		215.099
YJL121C	10	191623	32.7771	190143	191623	ARS1008.0.1	190000	lagging	143.57	276.111		120.204
YJL117W	10	191963	32.7771	191963	193723	ARS1008.0.1	190000	lagging	539.785	138.418		405.048
YJL119C	10	192392	33.1951	191432	192392	ARS1008.0.1	190000	lagging	471.467	65.6126		84.326
YJL112W	10	204755	33.6975	204755	207715	ARS1008.5.0	205200	lagging	321.81	529.552		229.72
YJL111W	10	207315	33.928	207315	209855	ARS1008.6.1	208400	lagging	718.028	649.186	372.49	571.448
YJL104W	10	226771	34.3123	226771	228131	ARS1009.2.0	226400	lagging	585.108	617.335	708.924	612.267
YJL043W	10	359723	33.3384	359723	361143	ARS1012.1.1	364800	leading		942.169		131.405
YJL044C	10	360223	34.1461	357903	360223	ARS1012.0.1	355200	lagging	387.263	778.816	223.021	323.661
YJL042W	10	360635	34.8592	360635	365655	ARS1012.1.1	364800	leading		257.515		113.401
YJL039C	10	374471	30.9842	368231	374471	ARS1012.3.0	370000	lagging	332.877	236.473	419.382	195.059
YJL037W	10	376611	30.2983	376611	377551	ARS1012.5.0	376000	lagging	939.205	389.603	246.597	193.929
YJL038C	10	377463	27.5488	374903	377463	ARS1012.5.0	376000	lagging	67.8153	56.5442	186.848	72.1601
YJL036W	10	378067	28.2161	378067	380367	ARS1012.5.0	376000	lagging	735.218	193.268	224.21	95.7232
YJL019W	10	402390	32.5263	402390	405070	ARS1014.0.4	401600	lagging	710.281	127.734	283.477	163.947
YJL020C	10	402999	32.0881	398659	402999	ARS1014.0.4	401600	leading		887.528	203.096	199.844
YJL016W	10	405081	33.3758	405081	407401	ARS1014.3.0	406000	lagging	747.823	651.96	409.617	837.624
YJL014W	10	407003	34.7433	407003	409563	ARS1014.4.0	407200	lagging	300.982	368.715	361.937	200.054
YJL015C	10	408009	32.2339	407009	408009	ARS1014.4.0	407200	lagging	300.982	368.715		200.054
YJL011C	10	415319	30.7808	413939	415319	ARS1014.8.0	414800	leading		112.855		148.091
YJL009W	10	419347	34.7995	419347	420307	ARS1014.9.1	418000	lagging	276.799	73.0474	54.0481	484.323
YJL008C	10	422199	28.4759	419579	422199	ARS1014.9.1	418000	lagging	335.382	258.598	329.618	778.565
YJL007C	10	423504	27.7808	422564	423504	ARS1014.11.0	422400	lagging	502.913	567.426	257.062	71.8169
YJL005W	10	424491	32.8958	424491	431451	ARS1014.12.0	423600	lagging	827.39	405.863	794.297	246.161
YJL006C	10	424647	32.8958	422907	424647	ARS1014.11.0	422400	lagging	496.733	467.848	1171.22	136.993
YJL003W	10	431987	34.1517	431987	433347	ARS1015.0.1	432800	leading		72.1811		550.413
YJL001W	10	434611	31.205	434611	436251	ARS1015.1.1	436800	leading		783.982	386.359	151.285
YJL002C	10	435199	31.6497	432939	435199	ARS1015.0.1	432800	lagging	164.175	105.772	6715.25	178.496
YJR001W	10	436235	33.9083	436235	438875	ARS1015.1.1	436800	lagging	161.152	508.691	433.954	567.726
YJR003C	10	443071	33.5594	440811	443071	ARS1015.3.1	441600	lagging	675.782	142.317	107.842	393.889
YJR005W	10	445363	33.8078	445363	448403	ARS1015.5.0	445200	lagging	1038.56	436.109	356.086	96.8364
YJR004C	10	446175	34.6103	442555	446175	ARS1015.4.0	443200	lagging	153.148	151.124	222.046	298
YJR006W	10	448683	34.9824	448683	450863	ARS1016.1.0	451600	leading		873.727	579.522	249.034
YJR048W	10	525771	33.205	525771	526971	ARS1018.0.1	530000	leading		1423.84		236.488
YJR047C	10	525919	33.205	524659	525919	ARS1018.0.1	530000	leading		374.473		264.861
YJR057W	10	543539	26.9994	543539	544899	ARS1018.3.0	542000	lagging	163.556	265.539	4813.49	613.188
YJR056C	10	543183	25.2505	541463	543183	ARS1018.3.0	542000	lagging	477.555	75.0115		91.5662
YJR059W	10	545187	32.5296	545187	548547	ARS1018.3.0	542000	lagging	744.277	102.733	93.5011	55.8842
YJR058C	10	545943	33.0311	544503	545943	ARS1018.3.0	542000	lagging	148.25	185.162	255.632	465.188
YJR060W	10	548091	33.4595	548091	550531	ARS1018.6.0	549600	leading		117.16	596.244	131.589
YJR093C	10	604775	33.2806	602955	604775	ARS1018.5.0.0	608400	leading		216.572		320.161
YJR094C	10	606303	28.6646	604283	606303	ARS1018.5.0.0	608400	leading		478.545		160.282
YJR094W-A	10	607691	31.673	607691	609131	ARS1018.5.0.0	608400	lagging	354.581	697.265	243.956	1341.66
YJR095W	10	609099	34.9824	609099	611159	ARS1018.5.0.0	608400	lagging	55.8959	146.809	156.239	832.896
YJR096W	10	610539	33.0011	610539	612279	ARS1019.0.0	613200	leading		461.466	202.581	263.127
YJR097W	10	611787	32.6455	611787	613167	ARS1019.0.0	613200	leading		487.23	195.374	399.274
YJR101W	10	617643	33.313	617643	619303	ARS1019.0.0	613200	lagging	677.506	890.735	250.311	125.301
YJR100C	10	617895	33.313	616135	617895	ARS1019.0.0	613200	lagging	315.829	299.664	738.948	627.256
YJR103W	10	620067	30.8549	620067	622687	ARS1019.0.0	613200	lagging	137.216	280.436		450.869
YJR102C	10	620399	30.8549	618879	620399	ARS1019.0.0	613200	lagging	128.665	192.441		880.478
YJR105W	10	623027	34.4916	623027	624767	ARS1019.0.0	613200	lagging	186.014	213.858		102.857
YJR132W	10	668963	34.4413	668963	673023	ARS1020.4.2	667200	lagging	193.8	304.75	493.894	228.377
YJR133W	10	672395	34.3847	672395	673795	ARS1020.4.2	667200	lagging	121.214	469.467		80.5667
YJR134C	10	676415	31.4113	673435	676415	ARS1021.0.0	678800	leading		347.957		185.904
YJR135W-A	10	676451	31.4113	676451	677651	ARS1021.0.0	678800	leading		570.551		246.425
YJR135C	10	677327	30.5413	675967	677327	ARS1021.0.0	678800	leading		166.622		180.453
YJR136C	10	679231	31.4579	677191	679231	ARS1021.0.0	678800	leading		474.711		465.019
YJR138W	10	684035	33.8289	684035	689635	ARS1021.3.0	684400	lagging	485.246	ND	191.359	235.446
YJR137C	10	683975	34.3269	678695	683975	ARS1021.0.0	678800	lagging	575.942	270.017	378.882	301.841
YKL204W	11	53180	34.4634	53180	55880	ARS1102.5.0.1	51600	lagging	158.331	366.665	182.278	74.497
YKL004W	11	434367	34.2049	434367	436687	ARS1113.5.1.0	442400	leading		342.822		294.167
YKR004C	11	448243	32.8633	445203	448243	ARS1113.5.3.0	443600	lagging	106.615	251.132		375.037
YLL029W	12	80820	33.8218	80820	83960	ARS1205.2.0	77600	lagging	113.063	534.769	309.018	349.121
YLL031C	12	80808	33.8218	76888	80808	ARS1205.2.0	77600	lagging	771.906	357.335	291.642	421.281
YLL030C	12	81195	33.8218	80215	81195	ARS1205.2.0	77600	lagging	107.834	98.9452		197.039
YLL027W	12	86692	31.1807	86692	88392	ARS1206.1.0	87200	lagging	158.574	156.296	100.066	296.711
YLL026W	12	87948	34.5518	87948	91568	ARS1206.1.0	87200	lagging	91.4272	1078.63	316.853	1788.62
YLR038C	12	225752	33.6066	224472	225752	ARS1210.1.0	225200	leading		314.494		255.522
YLR041W	12	228877	32.1333	228877	229837	ARS1211.0.1	230400	leading		96.5498		96.6849
YLR039C	12	229064	32.1333	225224	229064	ARS1210.1.0	225200	lagging	317.025	402.224	1613.54	262.701
YLR042C	12	231912	33.8204	229792	231912	ARS1211.0.1	230400	lagging	469.742	253.363	200.902	274.381
YLR043C	12	232592	34.8625	231392	232592	ARS1211.1.0	232000	leading		228.711		182.32
YLR044C	12	234712	34.5543	232152	234712	ARS1211.1.0	232000	lagging	157.502	173.929	317.746	439.625
YLR109W	12	368100	27.0552	368100	369520	ARS1213.0.0	371600	leading		288.632		450.747
YLR108C	12	368704	29.1357	366404	368704	ARS1212.5.1.2	363200	lagging	182.092	622.813	730.026	479.936
YLR111W	12	369891	34.9371	369891	370851	ARS1213.0.0	371600	leading		296.576		348.513
YLR114C	12	377840	34.271	374360	377840	ARS1213.0.1	373600	lagging	351.609	354.011	962.755	556.614
YLR117C	12	385072	30.8684	382152	385072	ARS1213.0.1	373600	lagging	380.565	180.536	60.2557	327.466
YLR119W	12	385068	30.8684	385068	386388	ARS1213.0.1	373600	lagging	505.091	456.561	178.406	272.267
YLR118C	12	385968	28.245	384488	385968	ARS1213.0.1	373600	lagging	270.193	95.4439	132.844	232.666
YLR126C	12	396096	32.6748	394496	396096	ARS1215.0.0	412400	leading		503.664		97.7004
YLR131C	12	407322	29.9584	404382	407322	ARS1215.0.0	412400	leading		139.907		170.125
YLR133W	12	407876	29.6923	407876	410416	ARS1215.0.0	412400	leading		473.137		417.972
YLR132C	12	408655	30.5205	407155	408655	ARS1215.0.0	412400	leading		504.377		260.14
YLR135W	12	412692	33.928	412692	415872	ARS1215.0.1	413600	lagging	59.1492	64.4844	83.05	160.431
YLR137W	12	416308	30.5396	416308	418328	ARS1215.0.1	413600	lagging	35.2849	309.247	307.809	412.165
YLR136C	12	417256	32.7268	414456	417256	ARS1215.0.1	413600	lagging	115.54	455.108	300.909	348.82
YLR138W	12	417780	33.7313	417780	421600	ARS1215.1.0	422400	leading		208.255		186.882
YLR151C	12	443232	34.8836	441212	443232	ARS1216.1.0	443200	leading		319.842		122.034
YLR171W	12	500234	33.5307	500234	501254	ARS1217.1.0	513600	leading		172.802		204.966
YLR170C	12	501592	25.9218	500192	501592	ARS1217.1.0	513600	leading		254.919		221.948
YLR173W	12	501844	26.6865	501844	504664	ARS1217.1.0	513600	leading		322.493		112.792
YLR172C	12	502696	31.7706	500996	502696	ARS1217.1.0	513600	leading		358.166		263.229
YLR175W	12	505596	34.5093	505596	507916	ARS1217.1.0	513600	leading		163.813		ND
YLR177W	12	509860	24.8802	509860	513140	ARS1217.1.0	513600	leading		205.76		310.534
YLR176C	12	510688	24.5893	507468	510688	ARS1217.1.0	513600	leading		90.2105		151.118
YLR180W	12	514620	32.2497	514620	516800	ARS1217.1.0	513600	lagging	143.704	328.447	1196.38	1136.14
YLR179C	12	515352	33.6663	513892	515352	ARS1217.1.0	513600	lagging	969.952	387.599	945.634	400.953
YLR295C	12	722874	34.3518	721874	722874	ARS1222.0.0	725600	leading		ND		146.165
YLR297W	12	723244	32.674	723244	724924	ARS1222.0.0	725600	leading		215.149	324.132	269.543
YLR299W	12	725396	32.3033	725396	728456	ARS1222.0.0	725600	lagging	ND	436.904	330.906	300.711
YLR298C	12	725960	33.7411	724380	725960	ARS1222.0.0	725600	leading		102.589		340.638
YLR304C	12	738096	31.8688	734856	738096	ARS1222.2.0	732000	lagging	1268.41	734.471		97.6277
YLR306W	12	743564	33.9976	743564	745104	ARS1223.2.0	746000	leading		326.21	328.145	806.558
YLR305C	12	744424	34.1252	737904	744424	ARS1223.0.0	740400	lagging	215.882	442.421	351.395	504.567
YLR307W	12	744940	34.3464	744940	746760	ARS1223.2.0	746000	leading		359.297	807.792	232.418
YMR046W-A	13	362200	20.4057	362200	362960	ARS1312.0.0	364400	leading		87.1599		95.41
YMR048W	13	366468	25.6975	366468	368108	ARS1312.0.1	366800	lagging	56.2103	74.3622	256.778	225.124
YMR047C	13	367288	26.3757	363168	367288	ARS1312.0.0	364400	lagging	136.91	264.295		118.044
YNL308C	14	56432	34.3557	53872	56432	ARS1406.0.0	62400	leading		149.314	81.7101	109.817
YNL297C	14	77122	34.2386	71322	77122	ARS1406.1.1	66800	lagging	383.376	481.563	430.093	359.157
YNL292W	14	82286	31.9154	82286	84206	ARS1407.1.0	89200	leading		477.104		342.75
YNL290W	14	85702	33.3869	85702	87462	ARS1407.1.0	89200	leading		238.777		110.565
YNL291C	14	86546	34.4808	83946	86546	ARS1407.1.0	89200	leading		374.382		302.209
YNL289W	14	87326	31.6087	87326	89006	ARS1407.1.0	89200	leading		67.5725		56.6109
YNL195C	14	272898	33.3162	271418	272898	ARS1414.0.1	270800	lagging	649.012	517.626	595.278	442.448
YNL193W	14	273862	30.7818	273862	276162	ARS1414.2.1	278000	leading		370.083	152.555	566.686
YNL194C	14	274202	30.741	272362	274202	ARS1414.2.1	278000	leading		229.445	4882.04	ND
YNL176C	14	307674	29.7567	304794	307674	ARS1414.7.1	300400	lagging	180.53	207.355	235.383	278.384
YNL174W	14	307575	28.8846	307575	308775	ARS1415.0.0	314400	leading		736.065	585.32	264.96
YNL172W	14	310137	31.417	310137	316017	ARS1415.0.0	314400	leading		246.925		451.539
YNL173C	14	310818	30.8293	308698	310818	ARS1415.0.0	314400	leading		506.689		856.447
YNL170W	14	315479	30.4201	315479	316499	ARS1415.0.0	314400	lagging	86.0275	77.8709	246.003	621.433
YNL171C	14	316498	31.8485	315498	316498	ARS1415.0.0	314400	lagging	86.0275	77.8709	246.003	621.433
YNL168C	14	319370	32.7475	317750	319370	ARS1415.1.1	318800	leading		1338.23		278.307
YNL167C	14	322210	30.9082	319130	322210	ARS1415.1.1	318800	lagging	179.271	190.793	643.603	174.773
YNL165W	14	323246	32.7038	323246	325286	ARS1415.5.0	323200	lagging	385.283	310.739	220.22	2798.97
YNL166C	14	324098	32.2596	322018	324098	ARS1415.4.0	322400	lagging	184.681	278.267	1236.09	145.956
YNL164C	14	326994	33.0762	325054	326994	ARS1415.5.2	326000	lagging	138.628	34.212	158.172	364.106
YNL162W-A	14	329806	34.2948	329806	331026	ARS1415.7.1	329200	lagging	480.687	368.498	158.552	269.916
YNL163C	14	330634	34.0986	326514	330634	ARS1415.7.0	327600	lagging	102.948	1085.28	415.59	225.932
YNL162W	14	330790	34.0986	330790	332390	ARS1415.7.1	329200	lagging	100.438	121.453	72.9829	157.244
YNL116W	14	407790	34.712	407790	410150	ARS1417.0.2	408000	lagging	129.017	264.841	156.241	210.743
YNL097C	14	443010	34.4476	441070	443010	ARS1419.0.1	444800	leading		203.022	160.578	683.331
YNL096C	14	444882	31.9451	443082	444882	ARS1419.0.1	444800	leading		42.1412	177.097	264.914
YNL074C	14	488690	34.5741	486450	488690	ARS1420.0.1	493600	leading		369.272	257.475	168.187
YNL050C	14	535539	32.4068	533899	535539	ARS1421.1.0	543600	leading		411.156		411.586
YNL048W	14	537655	31.2902	537655	540055	ARS1421.1.0	543600	leading		266.354		244.586
YNL049C	14	538459	29.0438	535059	538459	ARS1421.1.0	543600	leading		543.432		512.239
YNL046W	14	541623	32.1883	541623	543063	ARS1421.1.0	543600	leading		59.5814		96.9033
YNL047C	14	542563	33.2018	539683	542563	ARS1421.1.0	543600	leading		ND		138.694
YNL045W	14	542479	33.2018	542479	545159	ARS1421.1.0	543600	lagging	514.637	386.662	689.901	328.904
YNL044W	14	544695	31.9436	544695	546135	ARS1421.1.1	544400	lagging	188.788	371.342	451.507	83.4542
YNL042W-B	14	546613	32.339	546613	547493	ARS1421.2.0	546800	lagging	59.237	53.6057	256.102	158.493
YNL043C	14	546409	32.339	545449	546409	ARS1421.1.1	544400	lagging	411.889	403.474		29.1094
YNL042W	14	547439	34.737	547439	549499	ARS1421.3.0	548000	lagging	1259.15	604.889	586.008	648.936
YNL040W	14	551743	32.0048	551743	555043	ARS1421.4.1	550800	lagging	1300.39	407.905	609.202	440.889
YNL041C	14	552547	32.3345	549167	552547	ARS1421.4.0	550000	lagging	336.054	621.73	180.533	115.31
YNL039W	14	554511	29.5656	554511	556971	ARS1421.4.2	554400	lagging	499.232	ND	245.433	186.551
YNL038W	14	556511	25.0838	556511	558051	ARS1421.4.2	554400	lagging	1235.01	521.153		686.958
YNL021W	14	592615	33.0345	592615	595535	ARS1424.0.2	604800	leading		453.258		534.325
YNL022C	14	593419	31.3272	591199	593419	ARS1424.0.2	604800	leading		64.3641		454.149
YNL016W	14	602303	30.7249	602303	604823	ARS1424.0.2	604800	leading		86.2113		242.714
YNL018C	14	602274	30.7249	599814	602274	ARS1424.0.2	604800	leading		520.175		152.865
YNL017C	14	602976	28.8471	602016	602976	ARS1424.0.2	604800	leading		55.8456		73.7734
YNL015W	14	604815	24.2492	604815	605915	ARS1424.0.2	604800	lagging	669.19	459.376	224.903	206.85
YNL014W	14	605639	28.8605	605639	609559	ARS1424.1.0	606000	lagging	332.763	62.933	256.811	503.213
YNL012W	14	609791	29.123	609791	611951	ARS1424.2.0	609600	lagging	394.799	573.942		556.882
YNL013C	14	610010	29.899	609010	610010	ARS1424.2.0	609600	leading		ND		ND
YNL010W	14	613079	28.7763	613079	614639	ARS1424.3.0	614400	leading		973.72	ND	237.59
YNL011C	14	613931	31.002	611531	613931	ARS1424.2.1	611600	lagging	706.291	465.176	268.751	407.613
YNL008C	14	618755	34.9919	616055	618755	ARS1424.3.0	614400	lagging	161.023	191.494	227.233	272.61
YNR001W-A	14	630764	30.3961	630764	631604	ARS1426.0.0	633600	leading		166.497		ND
YNR001C	14	631747	30.9965	629327	631747	ARS1426.0.0	633600	leading		1068.7		788.006
YNR003W-A	14	633921	31.2544	633921	634641	ARS1426.1.0	634400	leading		347.144	376.912	312.876
YNR002C	14	634403	30.2303	632743	634403	ARS1426.0.0	633600	leading		60.3548		252.972
YNR004W	14	634983	29.9531	634983	636883	ARS1426.1.0	634400	lagging	300.872	141.061		ND
YNR003C	14	635827	28.5327	633887	635827	ARS1426.1.0	634400	lagging	280.784	319.137	364.801	250.687
YNR005C	14	637836	28.28	636796	637836	ARS1426.2.0	637600	leading		45.4772		139.26
YNR008W	14	639847	32.2496	639847	642607	ARS1426.2.1	640400	lagging	585.73	297.479	343.422	65.2277
YNR007C	14	640667	34.6521	638707	640667	ARS1426.2.1	640400	leading		145.747	94.6291	97.1539
YNR031C	14	686219	34.0299	680499	686219	ARS1427.2.0	691200	leading		376.071	857.519	210.251
YNR033W	14	687135	33.9457	687135	690115	ARS1427.2.0	691200	leading		121.696		288.791
YOL127W	15	79821	29.9813	79821	81401	ARS1507.4.1	78400	lagging	150.762	511.909		444.336
YOL128C	15	79977	29.9813	78137	79977	ARS1507.4.1	78400	lagging	708.162	316.339	80.4847	516.514
YOL112W	15	106037	32.6797	106037	108357	ARS1509.0.0	112400	leading		284.644		80.917
YOL088C	15	155313	34.7672	153633	155313	ARS1509.5.0.0	156400	leading		717.438	85.663	772.363
YOL086W-A	15	158629	20.2565	158629	159569	ARS1509.5.1.0	157600	lagging	44.4304	232.791	125.573	176.335
YOL087C	15	159417	24.15	155077	159417	ARS1509.5.0.0	156400	lagging	1480.86	805.86		312.001
YOL085W-A	15	161078	27.37	161078	161918	ARS1509.5.1.0	157600	lagging	74.478	ND	493.423	95.3819
YOL086C	15	161137	27.37	159337	161137	ARS1509.5.1.0	157600	lagging	ND	ND	57.6342	122.474
YOL084W	15	161653	31.1531	161653	165433	ARS1509.5.1.0	157600	lagging	417.51	527.827	620.533	553.417
YOL085C	15	162513	34.4935	161533	162513	ARS1509.5.1.0	157600	lagging	129.131	511.589	578.842	197.888
YOL083C-A	15	167100	33.5896	166320	167100	ARS1510.0.1	167600	leading		228.084		ND
YOL082W	15	167933	33.2671	167933	170213	ARS1510.1.0	168800	lagging	194.718	224.208	285.585	234.507
YOL056W	15	222685	33.6223	222685	224465	ARS1510.5.0.0	222000	lagging	1255.01	156.156	116.634	217.891
YOL032W	15	264845	33.6552	264845	266325	ARS1511.0.0	270400	leading		191.584		274.716
YOL029C	15	270920	31.5118	269680	270920	ARS1511.0.0	270400	leading		202.915		78.0704
YOL028C	15	271870	32.1339	270510	271870	ARS1511.0.0	270400	lagging	ND	598.676	65.8599	357.552
YOL027C	15	274281	33.3663	271701	274281	ARS1511.0.0	270400	lagging	493.013	586.387	92.7079	130.23
YOL025W	15	274405	33.5172	274405	277065	ARS1511.3.0	278400	leading		315.257	170.616	467.94
YOL026C	15	274889	33.1432	273789	274889	ARS1511.0.0	270400	lagging	328.428	774.313		621.408
YOL024W	15	276586	31.9906	276586	277726	ARS1511.3.0	278400	leading		66.8324		119.133
YOL023W	15	277541	34.789	277541	280301	ARS1511.3.0	278400	lagging	130.672	177.304	445.583	267.5
YOL022C	15	282049	32.9581	280129	282049	ARS1511.4.0	280000	lagging	139.338	606.909	188.511	394.767
YOR002W	15	328861	33.7461	328861	331521	ARS1513.0.0	330000	lagging	90.1851	256.293	290.742	165.7
YOR003W	15	331413	33.9984	331413	333193	ARS1513.0.1	331200	lagging	657.39	534.226	558.681	129.771
YOR004W	15	333037	34.275	333037	334637	ARS1513.1.0	333600	lagging	259.75	224.323	233.642	82.2075
YOR068C	15	454714	34.9806	453734	454714	ARS1513.5.1.0	464000	leading		ND		145.321
YOR070C	15	458489	29.3854	455669	458489	ARS1513.5.1.0	464000	leading		446.02		200.807
YOR089C	15	491393	33.3267	489793	491393	ARS1515.5.0.0	492000	leading		1140.69		160.28
YOR091W	15	492597	34.8429	492597	494777	ARS1515.5.0.0	492000	lagging	111.778	272.13	61.0666	695.404
YOR313C	15	903938	34.091	901598	903938	ARS1528.0.0	902400	lagging	853.678	534.129	498.631	169.279
YOR315W	15	904118	32.9836	904118	906298	ARS1528.1.0	906000	leading		259.647	144.127	274.922
YOR314W-A	15	903954	34.091	903954	904694	ARS1528.1.0	906000	leading		208.099	180.191	188.529
YOR377W	15	1045723	34.149	1045723	1047923	ARS1529.5.3.0	1051600	leading		275.975	317.609	514.943
YOR378W	15	1049014	27.0628	1049014	1051254	ARS1529.5.3.0	1051600	leading		290.966	200.365	346.755
YOR381W	15	1053806	31.2506	1053806	1057886	ARS1529.5.4.1	1054800	lagging	246.665	156.062	248.109	513.747
YPL267W	16	37660	34.8261	37660	38900	ARS1604.0.0	43200	leading		669.295		340.899
YPL266W	16	38540	34.7667	38540	40300	ARS1604.0.0	43200	leading		302.81		283.339
YPL255W	16	67156	32.1545	67156	69216	ARS1605.0.1	74400	leading		214.586		96.9578
YPL256C	16	67488	32.5795	64648	67488	ARS1605.0.1	74400	leading		176.82		ND
YPL254W	16	68748	34.6639	68748	71228	ARS1605.0.1	74400	leading		289.506		260.344
YPL251W	16	73124	30.4182	73124	74064	ARS1605.0.1	74400	leading		164.196		ND
YPL253C	16	73568	31.7804	70848	73568	ARS1605.0.1	74400	leading		192.543		139.085
YPL252C	16	74480	33.6981	73140	74480	ARS1605.0.1	74400	leading		164.196	134.966	ND
YPL250W-A	16	75201	34.1433	75201	76121	ARS1605.0.1	74400	lagging	127.475	199.93	116.227	18.7618
YPL250C	16	75288	34.1433	74028	75288	ARS1605.0.1	74400	lagging	88.073	83.1721	47.0706	134.321
YPL249C-A	16	76872	32.3041	75412	76872	ARS1605.0.1	74400	lagging	86.195	ND	50.9617	166.561
YPL249C	16	79904	30.9988	76564	79904	ARS1605.0.1	74400	lagging	207.917	232.798	83.1096	ND
YPL248C	16	82888	33.8775	79548	82888	ARS1605.0.1	74400	lagging	295.957	159.144	95.3652	108.526
YPL145C	16	280480	34.4906	277760	280480	ARS1614.1.0	285600	leading		798.89		213.758
YPL143W	16	281564	30.4573	281564	283244	ARS1614.1.0	285600	leading		237.715		225.082
YPL142C	16	283501	33.4909	282561	283501	ARS1614.1.0	285600	leading		841.579		ND
YPL141C	16	286816	33.2837	283216	286816	ARS1614.1.0	285600	leading		652.551		115.677
YPL140C	16	289760	33.9157	287220	289760	ARS1614.1.1	286800	lagging	77.723	65.3384	39.3974	104.059
YPL139C	16	291608	31.3148	289408	291608	ARS1614.3.0	290000	lagging	109.326	230.854	ND	262.621
YPL138C	16	292984	27.5133	291064	292984	ARS1614.3.0	290000	lagging	419.943	831.625		282.35
YPL136W	16	295784	31.964	295784	296784	ARS1614.4.1	293600	lagging	137.481	98.8881	52.6636	332.638
YPL135W	16	296956	32.4021	296956	298556	ARS1614.4.1	293600	lagging	119.651	382.736		491.221
YPL137C	16	297808	34.9246	292528	297808	ARS1614.4.1	293600	lagging	2347.42	517.48	369.969	589.873
YPL090C	16	378970	30.5644	377010	378970	ARS1618.1.0	385200	leading		90.5006		53.2153
YPL088W	16	380806	31.8191	380806	383166	ARS1618.1.0	385200	leading		298.251		147.273
YPL089C	16	381906	33.253	378866	381906	ARS1618.1.0	385200	leading		159.922		138.125
YPL087W	16	382822	32.8308	382822	384662	ARS1618.1.0	385200	leading		337.285		116.287
YPL085W	16	386382	30.3175	386382	393742	ARS1618.1.1	386400	lagging	457.906	68.5415		483.842
YPL086C	16	387002	29.5753	384602	387002	ARS1618.1.0	385200	lagging	128.245	128.66		40.2199
YPL079W	16	406102	33.7705	406102	407782	ARS1618.5.0.2	406800	lagging	931.968	563.375	171.426	367.385
YPL080C	16	406994	32.9325	406034	406994	ARS1618.5.0.2	406800	leading		182.644	139.472	494.186
YPL076W	16	409806	34.7467	409806	412206	ARS1618.5.1.1	410400	lagging	3107.6	170.317		ND
YPL077C	16	410626	32.93	408926	410626	ARS1618.5.1.1	410400	leading		782.504		236.007
YPL075W	16	411654	32.9089	411654	415554	ARS1618.5.1.2	411600	lagging	398.473	193.624	138.39	174.722
YPL074W	16	415222	30.6786	415222	418202	ARS1618.5.3.0	415600	lagging	224.376	125.363	175.37	475.859
YPL072W	16	417822	33.8577	417822	420182	ARS1618.5.4.0	418800	lagging	ND	ND	ND	ND
YPL070W	16	420230	34.6182	420230	423090	ARS1618.5.4.0	418800	lagging	91.9558	182.183	1281.47	49.5241
YPL071C	16	421074	34.6112	419894	421074	ARS1618.5.4.0	418800	lagging	860.615	541.338	3110.14	68.7288
YPL063W	16	429310	33.0054	429310	431710	ARS1618.5.4.0	418800	lagging	353.358	262.745	255.464	ND
YPL064C	16	430138	34.8537	428498	430138	ARS1618.5.4.0	418800	lagging	347.747	107.442	155.282	96.3215
YPL027W	16	499162	32.1793	499162	500522	ARS1621.1.0	512000	leading		335.044	102.151	277.735
YPL024W	16	502550	29.006	502550	504470	ARS1621.1.0	512000	leading		192.524	400.873	307.224
YPL026C	16	502746	29.006	500266	502746	ARS1621.1.0	512000	leading		195.832	154.03	220.516
YPL025C	16	503527	28.5109	502347	503527	ARS1621.1.0	512000	leading		187.75	274.884	ND
YPL022W	16	506110	33.1182	506110	510350	ARS1621.1.0	512000	leading		259.18		239.486
YPL023C	16	506946	34.9236	504086	506946	ARS1621.1.0	512000	leading		161.662	250.342	902.129
YPL020C	16	514802	28.4558	512202	514802	ARS1621.2.0	512400	lagging	238.63	344.471	386.319	134.253
YPL018W	16	516750	25.9318	516750	520030	ARS1621.2.1	514400	lagging	200.285	99.554	145.467	179.955
YPL019C	16	517842	29.5044	514342	517842	ARS1621.2.1	514400	lagging	210.901	242.133	126.011	181.616
YPL003W	16	551494	33.1773	551494	553534	ARS1622.3.1	550800	lagging	1507.78	64.8411	134.063	97.3863
YPL001W	16	554086	34.3692	554086	555846	ARS1622.4.0	554000	lagging	118.185	659.371		458.158
YPL002C	16	554882	33.4988	553082	554882	ARS1622.4.0	554000	leading		165.051	99.5354	126.586
YPR001W	16	555838	33.5152	555838	558118	ARS1622.6.0	556800	lagging	160.44	379.468	235.554	247.197
YPR002C-A	16	561262	32.4946	560442	561262	ARS1622.8.0	561200	leading		148.954	81.2396	150.916
YPR003C	16	564322	33.4129	561122	564322	ARS1622.8.0	561200	lagging	359.556	224.601	505.422	144.396
YPR004C	16	565602	30.6577	563822	565602	ARS1622.5.0.0	566000	leading		117.812		ND
YPR026W	16	614294	33.9887	614294	619234	ARS1623.0.0	629600	leading		260.62	479.952	354.423
YPR025C	16	615074	33.4891	613174	615074	ARS1623.0.0	629600	leading		248.668	251.316	ND
YPR027C	16	621754	34.6388	620294	621754	ARS1623.0.0	629600	leading		1547.43		186.674
YPR029C	16	627514	27.4764	624114	627514	ARS1623.0.0	629600	leading		808.815		ND
YPR030W	16	628734	28.4329	628734	631474	ARS1623.0.0	629600	lagging	333.18	341.977	791.147	474.478
YPR031W	16	630982	31.4526	630982	633982	ARS1623.0.0	629600	lagging	190.09	324.803	331.481	304.369
YPR032W	16	633566	23.3672	633566	637366	ARS1623.1.0	634400	lagging	309.058	399.505	105.275	216.364
YPR034W	16	638862	27.7006	638862	641342	ARS1623.1.0	634400	lagging	89.7551	191.11		90.7197
YPR033C	16	639602	33.0281	637122	639602	ARS1623.1.0	634400	lagging	247.805	125.851	189.374	107.847
YPR035W	16	641262	32.8173	641262	643622	ARS1623.4.1	646400	leading		154.122	145.75	109.541
YPR036W	16	643286	34.5799	643286	645486	ARS1623.4.1	646400	leading		675.27		125.269
YPR059C	16	675196	34.4204	674176	675196	ARS1624.0.0	684800	leading		69.1914		603.541
YPR060C	16	676127	31.6643	674727	676127	ARS1624.0.0	684800	leading		122.609		67.5247
YPR062W	16	676630	32.3767	676630	677870	ARS1624.0.0	684800	leading		79.9265		ND
YPR061C	16	677418	34.2089	675838	677418	ARS1624.0.0	684800	leading		131.423		ND
YPR064W	16	678447	32.8672	678447	679487	ARS1624.0.0	684800	leading		169.675		50.2325
YPR065W	16	679038	32.297	679038	681198	ARS1624.0.0	684800	leading		146.903		63.836
YPR063C	16	678874	32.297	677494	678874	ARS1624.0.0	684800	leading		646.459		172.249
YPR066W	16	680670	32.1295	680670	682250	ARS1624.0.0	684800	leading		35.53		91.8727
YPR067W	16	681678	34.3907	681678	682998	ARS1624.0.0	684800	leading		65.1814		100.438
YPR073C	16	692986	34.3118	691506	692986	ARS1625.1.0	692800	leading		476.281		281.437
YPR120C	16	775802	26.7575	773582	775802	ARS1626.5.0.1	774000	lagging	168.445	207.625	94.2158	124.359
YPR141C	16	818586	33.898	815446	818586	ARS1627.1.0	816800	lagging	153.113	104	137.899	112.977
YPR142C	16	819188	32.7406	817988	819188	ARS1627.2.0	819200	leading		235.296		223.648
YPR148C	16	828706	32.2533	826586	828706	ARS1627.5.0	825600	lagging	ND	148.782	287.248	59.6999
YPR149W	16	829230	30.381	829230	830930	ARS1627.5.0	825600	lagging	129.232	104.866	126.755	94.9793
YPR150W	16	830494	33.0195	830494	831654	ARS1627.5.0	825600	lagging	526.491	388.719	96.4755	223.687
YPR151C	16	832162	32.556	830582	832162	ARS1627.5.0	825600	lagging	572.144	313.527	84.8642	310.264
YPR153W	16	833150	32.1382	833150	834650	ARS1628.1.0	837600	leading		183.194		136.63
YPR155C	16	837970	28.8124	835330	837970	ARS1628.1.0	837600	leading		224.156		127.813
YAL063C	1	28468	35.7077	23868	28468	ARS103.1.4	22800	lagging	139.084	97.7454	353.983	154.244
YAL061W	1	32860	38.3075	32860	35020	ARS104.0.0	31600	lagging	368.037	2425.73	243.506	141.263
YAL060W	1	34596	38.4561	34596	36516	ARS104.1.0	35200	lagging	415.29	218.498		203.409
YAL059W	1	36044	36.3387	36044	37464	ARS104.1.0	35200	lagging	1153.44	340.384	129.627	394.646
YAL058W	1	36908	37.1283	36908	39168	ARS104.1.0	35200	lagging	403.44	925.067	300.125	ND
YAL059C-A	1	37418	37.3578	36358	37418	ARS104.1.0	35200	lagging	454.185	331.567	118.5	404.088
YAL056W	1	38716	38.6828	38716	42096	ARS105.0.0	42000	leading		163.435	705.666	103.619
YAL053W	1	45260	44.4753	45260	48440	ARS105.0.0	42000	lagging	438.925	359.656		218.094
YAL054C	1	45568	44.4753	43408	45568	ARS105.0.0	42000	lagging	374.44	ND	398.953	162.119
YAL047W-A	1	54084	41.4475	54084	55044	ARS105.0.0	42000	lagging	655.921	1106.35	ND	302.79
YAL048C	1	55342	38.8119	52522	55342	ARS105.0.0	42000	lagging	930.274	638.045	311	313.611
YAL046C	1	57918	38.3844	56798	57918	ARS106.1.0	68800	leading		478.415		352.514
YAL045C	1	58296	36.4536	57356	58296	ARS106.1.0	68800	leading		503.698		167.711
YAL042W	1	60778	36.6614	60778	62778	ARS106.1.0	68800	leading		353.996		295.217
YAL043C	1	61590	39.2424	58470	61590	ARS106.1.0	68800	leading		315.157		116.224
YAL042C-A	1	62108	41.7505	61108	62108	ARS106.1.0	68800	leading		129.66		204.828
YAL041W	1	62290	41.7505	62290	65730	ARS106.1.0	68800	leading		213.339		191.011
YAL040C	1	68350	37.4217	65330	68350	ARS106.1.0	68800	leading		925.76	58.9772	124.469
YAL039C	1	70110	35.9523	68510	70110	ARS106.1.0	68800	lagging	796.595	205.229	226.983	121.52
YAL038W	1	71178	35.0081	71178	73578	ARS106.2.0	70800	lagging	1195.33	125.433	338.897	213.854
YAL037W	1	73434	38.6935	73434	75094	ARS106.2.0	70800	lagging	116.021	152.104	74.5607	171.572
YAL037C-B	1	73800	39.1267	72200	73800	ARS106.2.0	70800	lagging	530.377	138.355	184.108	156.849
YAL037C-A	1	74018	39.1189	73298	74018	ARS106.2.0	70800	lagging	373.858	113.929	194.843	ND
YAL035W	1	75882	37.0399	75882	79662	ARS106.2.0	70800	lagging	598.896	332.824	103.96	221.406
YAL036C	1	76710	37.042	74750	76710	ARS106.2.0	70800	lagging	75.9976	461.805	83.3641	76.7121
YAL034W-A	1	79194	39.3082	79194	80774	ARS106.2.0	70800	lagging	609.389	274.41	ND	ND
YAL034C-B	1	80342	41.7526	79362	80342	ARS106.2.0	70800	lagging	769.468	269.458	200.232	115.413
YAL023C	1	109166	40.1833	106026	109166	ARS107.0.1	110400	leading		597.574	45.074	184.494
YAL022C	1	110966	38.6485	108726	110966	ARS107.0.1	110400	leading		332.954		244.296
YAL021C	1	113934	36.9057	110494	113934	ARS107.0.1	110400	lagging	655.808	301.374		288.964
YAL019W-A	1	113750	36.9057	113750	114950	ARS107.0.1	110400	lagging	155.266	ND	239.359	160.631
YAL019W	1	114419	38.2413	114419	118439	ARS107.0.1	110400	lagging	397.69	419.466	225.156	333.077
YAL020C	1	115182	38.4056	113422	115182	ARS107.0.1	110400	lagging	155.266	696.242	269.236	151.064
YAL009W	1	135322	41.9852	135322	136842	ARS107.5.1.0	137600	leading		85.6552		92.5752
YAL007C	1	138950	43.3353	137430	138950	ARS107.5.1.0	137600	lagging	87.1237	118.2	113.169	137.517
YAL004W	1	140261	37.702	140261	141541	ARS107.5.1.1	140400	lagging	95.7987	44.2649	147.365	250.229
YAR027W	1	183263	35.7411	183263	184603	ARS110.2.0	184800	leading		297.554		349.005
YAR028W	1	184385	43.6514	184385	185725	ARS110.2.0	184800	lagging	637.554	239.694	335.776	252.923
YAR030C	1	187346	38.752	186366	187346	ARS110.2.0	184800	lagging	131.685	81.6813	146.475	36.4818
YAR033W	1	187600	38.752	187600	188940	ARS110.2.0	184800	lagging	ND	ND	88.9367	340.223
YAR035W	1	189490	37.3451	189490	192530	ARS110.2.0	184800	lagging	250.783	362.406	168.355	87.9525
YAR042W	1	192082	37.9686	192082	196382	ARS110.2.0	184800	lagging	276.99	98.4377	205.493	307.508
YBL108W	2	7676	39.1411	7676	8616	ARS201.2.0	10000	leading		280.378		109.246
YBL108C-A	2	8232	38.3895	7472	8232	ARS201.1.0	3	lagging	ND	114.327		74.2351
YBL107W-A	2	8767	38.22	8767	9507	ARS201.2.0	10000	leading		120.424		66.3824
YBL107C	2	11064	42.9836	9684	11064	ARS201.2.0	10000	lagging	923.998	467.665		188.098
YBL104C	2	21808	40.2226	17948	21808	ARS201.5.3.0	28800	leading		513.551		355.38
YBL102W	2	23492	36.7705	23492	25012	ARS201.5.3.0	28800	leading		329.254		147.364
YBL103C	2	24296	37.841	21716	24296	ARS201.5.3.0	28800	leading		329.973	289.593	306.663
YBL097W	2	40284	43.967	40284	43284	ARS201.5.3.0	28800	lagging	589.654	285.286		161.923
YBL095W	2	42644	42.431	42644	44324	ARS201.5.3.0	28800	lagging	ND	ND	127.748	436.384
YBL096C	2	43978	35.6249	43038	43978	ARS201.5.3.0	28800	lagging	1885.17	341.172	371.868	198.035
YBL079W	2	74684	39.9587	74684	79964	ARS202.3.0	66800	lagging	274.911	302.438	83.5398	44.2821
YBL080C	2	75240	41.722	72920	75240	ARS202.3.0	66800	lagging	329.16	481.714	152.014	70.0994
YBL078C	2	81264	42.8834	79764	81264	ARS203.2.0	92400	leading		608.496		ND
YBL074C	2	88286	42.6031	86586	88286	ARS203.2.0	92400	leading		381.571		35.4153
YBL072C	2	89622	43.4444	88382	89622	ARS203.2.0	92400	leading		179.674		183.249
YBL071W-A	2	89444	43.3282	89444	90604	ARS203.2.0	92400	leading		237.009		279.829
YBL071C-B	2	90053	43.5007	89333	90053	ARS203.2.0	92400	leading		ND		307.411
YBL069W	2	90238	43.5007	90238	92158	ARS203.2.0	92400	leading		929.703	94.8944	19041.1
YBL071C	2	91028	43.7961	90088	91028	ARS203.2.0	92400	leading		460.554		206.012
YBL070C	2	91422	44.1474	90462	91422	ARS203.2.0	92400	leading		916.993		214.138
YBL068W-A	2	91291	44.1474	91291	92151	ARS203.2.0	92400	leading		506.12		73.0076
YBL068W	2	91844	44.6928	91844	93704	ARS203.2.0	92400	lagging	626.378	60.6054	177.059	195.724
YBL031W	2	161178	44.8873	161178	162918	ARS207.1.0	166800	leading		772.408		103.12
YBL030C	2	164646	43.8282	162646	164646	ARS207.1.0	166800	leading		174.749		91.1094
YBL029W	2	165594	43.8804	165594	167494	ARS207.1.0	166800	leading		140.709		671.48
YBL029C-A	2	165382	43.8804	164362	165382	ARS207.1.0	166800	leading		467.019		293.914
YBL027W	2	167874	43.7496	167874	169634	ARS207.2.0	169200	leading		246.26	95.7703	156.265
YBL028C	2	168390	42.8849	167230	168390	ARS207.1.0	166800	lagging	198.309	401.421		36.8363
YBL026W	2	170050	41.0039	170050	171270	ARS207.3.0	170800	leading		227.473		203.331
YBL025W	2	170922	40.6289	170922	172342	ARS207.3.0	170800	lagging	612.202	316.63		140.123
YBL024W	2	172002	38.294	172002	174822	ARS207.4.0	171600	lagging	189.549	222.491	192.27	102.832
YBL023C	2	178110	37.289	174810	178110	ARS207.1.0.1	176000	lagging	451.963	470.468	119.254	369.522
YBL022C	2	181910	40.2581	177670	181910	ARS207.1.1.1	178000	lagging	833.533	1071.29	407.339	138.879
YBL020W	2	181834	40.2581	181834	184334	ARS207.1.2.1	180400	lagging	199.422	144.476	318.415	295.366
YBL021C	2	182646	40.3649	181366	182646	ARS207.1.2.1	180400	lagging	189.816	ND	105.937	456.5
YBL019W	2	183762	41.0283	183762	186102	ARS207.1.2.1	180400	lagging	1149.11	241.434		353.565
YBL018C	2	187030	37.4269	185770	187030	ARS207.1.7.0	188800	leading		ND		303.275
YBL008W-A	2	208911	35.8791	208911	209771	ARS207.8.2.0	208800	lagging	335.082	621.888	186.367	170.021
YBL008W	2	209155	35.8791	209155	212315	ARS207.8.2.0	208800	lagging	507.196	394.263	137.589	725.06
YBL004W	2	227027	35.3119	227027	235347	ARS208.0.0	236000	leading		630.72		493.496
YBR007C	2	251599	35.3417	248479	251599	ARS209.0.1	250000	lagging	137.528	233.594	227.296	508.655
YBR020W	2	278355	43.834	278355	281435	ARS210.5.0.0	267600	lagging	247.476	628.95	265.636	401.388
YBR039W	2	314995	41.1933	314995	316795	ARS211.0.3	317200	leading		215.186	92.5184	196.274
YBR040W	2	316467	38.2974	316467	317987	ARS211.0.3	317200	lagging	78.6565	106.491	75.1752	110.401
YBR041W	2	317699	35.8714	317699	320499	ARS211.0.3	317200	lagging	432.828	194.581		182.85
YBR043C	2	324615	37.5148	321655	324615	ARS211.1.0	322000	lagging	460.329	283.924		238.779
YBR044C	2	326647	37.8539	324147	326647	ARS211.3.0	327200	leading		111.022		414.602
YBR046C	2	332055	42.5236	330095	332055	ARS211.3.1	328800	lagging	290.149	ND		103.22
YBR048W	2	332235	42.5236	332235	334175	ARS211.4.1	333200	lagging	355.005	1177.7	232.023	145.62
YBR068C	2	376246	44.2952	373526	376246	ARS212.0.0	373600	lagging	450.373	888.798	333.444	283.959
YBR069C	2	379046	40.5269	375726	379046	ARS212.1.0	376800	lagging	493.682	1328.76	181.098	200.788
YBR071W	2	379738	40.8087	379738	381498	ARS212.3.0	381200	leading		ND	134.659	168.244
YBR070C	2	380478	41.4401	379038	380478	ARS212.3.0	381200	leading		469.075		88.3324
YBR072W	2	381442	41.3398	381442	382922	ARS212.3.0	381200	lagging	466.599	312.997	371.933	653.193
YBR073W	2	382634	40.0834	382634	386114	ARS212.4.0	384000	lagging	123.585	349.987	103.771	179.373
YBR072C-A	2	383515	39.4944	382715	383515	ARS212.4.0	384000	leading		458.803		189.788
YBR074W	2	385770	40.257	385770	389430	ARS213.0.0	389200	leading		336.706		180.038
YBR076W	2	389868	42.727	389868	391508	ARS213.0.0	389200	lagging	422.316	386.084	126.884	340.146
YBR076C-A	2	392110	40.2887	391210	392110	ARS213.1.1	391200	lagging	81.4592	585.236	694.557	977.77
YBR078W	2	392442	38.9601	392442	395422	ARS213.2.1	394000	leading		69.3276	389.855	231.773
YBR077C	2	392786	38.9601	391666	392786	ARS213.1.1	391200	lagging	178.977	99.212	216.892	ND
YBR080C	2	401422	39.1417	398342	401422	ARS213.4.0	398000	lagging	427.274	195.505	352.326	76.216
YBR085W	2	415370	36.7026	415370	417310	ARS215.0.1	416000	lagging	823.799	542.157		127.813
YBR084C-A	2	415798	35.5125	413958	415798	ARS215.0.1	416000	leading		984.345	ND	678.682
YBR085C-A	2	419766	42.6125	418406	419766	ARS215.0.1	416000	lagging	ND	213.443	154.076	94.2946
YBR087W	2	423242	42.2152	423242	425002	ARS215.5.0.1	432400	leading		367.508	489.286	103.834
YBR086C	2	423838	43.6497	419938	423838	ARS215.0.1	416000	lagging	658.702	360.138	271.253	278.779
YBR114W	2	466659	42.9437	466659	469799	ARS216.0.0	487600	leading		1003.62	289.971	139.317
YBR112C	2	466463	42.9437	462503	466463	ARS216.0.0	487600	leading		178.268	133.232	146.668
YBR118W	2	477059	41.218	477059	479259	ARS216.0.0	487600	leading		46.9289		66.2995
YBR117C	2	476930	41.218	474250	476930	ARS216.0.0	487600	leading		77.1652		147.126
YBR119W	2	478755	37.7952	478755	480575	ARS216.0.0	487600	leading		1954.64		242.739
YBR120C	2	481503	35.395	480223	481503	ARS216.0.0	487600	leading		40.0174		161.949
YBR126C	2	490983	35.3404	488643	490983	ARS216.0.0	487600	lagging	ND	ND	236.798	93.5743
YBR127C	2	493383	36.4091	490983	493383	ARS216.1.1	491200	lagging	250.059	306.929	131.219	285.65
YBR128C	2	494695	37.074	492875	494695	ARS216.1.1	491200	lagging	74.652	252.998	132.797	100.968
YBR129C	2	495871	40.0685	494151	495871	ARS216.1.1	491200	lagging	435.309	239.984	119.934	184.583
YBR131W	2	496643	40.7948	496643	499583	ARS217.0.1	499200	leading		348.439	214.453	354.793
YBR130C	2	497431	39.5482	495391	497431	ARS217.0.1	499200	leading		291.062	161.017	169.509
YBR131C-A	2	498232	38.2191	497512	498232	ARS217.0.1	499200	leading		ND	492.485	569.8
YBR172C	2	581983	44.0387	578883	581983	ARS219.1.0	586400	leading		559.2		214.982
YBR175W	2	581883	44.0387	581883	583583	ARS219.1.0	586400	leading		292.564		421.707
YBR177C	2	586719	44.3272	584479	586719	ARS219.1.0	586400	leading		544.119		317.058
YBR188C	2	604679	42.5488	603259	604679	ARS219.5.1.0	606000	leading		384.947		321.946
YBR191W	2	605764	38.1416	605764	607264	ARS219.5.1.0	606000	lagging	1576.37	446.186	125.312	166.399
YBR190W	2	605460	39.1785	605460	606400	ARS219.5.1.0	606000	leading		596.355	164.332	171.467
YBR192W	2	606955	35.7714	606955	609155	ARS219.5.1.0	606000	lagging	1072.31	132.918		256.301
YBR191W-A	2	606643	36.6621	606643	607343	ARS219.5.1.0	606000	lagging	1369.19	154.973		198.214
YBR194W	2	609411	37.633	609411	610711	ARS219.5.4.0	614000	leading		622.876	249.922	209.024
YBR193C	2	610303	37.0879	608523	610303	ARS219.5.4.0	614000	leading		595.106	527.6	439.497
YBR198C	2	619095	35.0867	615875	619095	ARS219.5.5.0	615600	lagging	76.5555	879.063	ND	5298.15
YBR200W	2	620315	37.1664	620315	622835	ARS220.0.0	623600	leading		175.028		183.029
YBR200W-A	2	622477	36.0907	622477	623277	ARS220.0.0	623600	leading		42.3961		ND
YBR201W	2	622931	35.1519	622931	624431	ARS220.0.0	623600	lagging	112.324	101.599		313.429
YBR203W	2	628435	40.8564	628435	632035	ARS221.1.0	630800	leading		681.477		196.066
YBR205W	2	633116	35.1927	633116	634956	ARS221.2.0	633200	lagging	1098.48	601.748	1837.84	92.7853
YBR204C	2	633919	35.9468	631839	633919	ARS221.1.1	632400	lagging	459.288	244.057	610.075	486.182
YBR206W	2	634095	36.4915	634095	635055	ARS221.3.0	634400	lagging	ND	ND		695.67
YBR207W	2	634563	37.2161	634563	636803	ARS221.3.0	634400	lagging	211.67	158.064	742.716	644.208
YBR238C	2	697887	40.5502	694447	697887	ARS222.0.0	698800	leading		503.677		75.1248
YBR239C	2	700655	36.5636	698175	700655	ARS222.0.0	698800	lagging	471.334	65.4134		118.157
YBR240C	2	702903	36.4672	700263	702903	ARS222.1.0	704000	leading		352.518		310.204
YBR242W	2	704011	39.8667	704011	705571	ARS222.1.0	704000	lagging	61.7141	314.836	ND	ND
YBR241C	2	704639	41.1413	702359	704639	ARS222.1.0	704000	leading		1181.43		287.394
YBR244W	2	706811	42.4793	706811	708291	ARS222.5.0.1	708000	leading		249.303		137.061
YBR243C	2	707335	42.6232	705135	707335	ARS222.1.1	705200	lagging	351.773	251.995	63.8678	91.3804
YBR265W	2	738019	43.3308	738019	739759	ARS225.0.0	752800	leading		283.54	105.226	221.498
YBR264C	2	738887	44.1967	737647	738887	ARS223.3.0	726400	lagging	773.255	286.334		382.106
YBR267W	2	739315	44.1627	739315	741235	ARS225.0.0	752800	leading		1360.88	640.106	187.003
YBR266C	2	740882	42.2957	739802	740882	ARS225.0.0	752800	leading		1890.26	640.106	358.921
YBR268W	2	740771	42.3856	740771	741891	ARS225.0.0	752800	leading		483.205	151.696	135.081
YBR290W	2	782059	44.1813	782059	783799	ARS228.0.0	784800	leading		336.162	112.073	193.268
YBR291C	2	785127	43.4474	783487	785127	ARS228.0.0	784800	leading		528.545	1888.89	207.771
YBR292C	2	785568	42.917	784568	785568	ARS228.1.0	789200	leading		493.849	533.588	236.667
YBR293W	2	786587	39.2623	786587	788787	ARS228.1.0	789200	leading		298.215		605.77
YBR294W	2	788729	40.6735	788729	791929	ARS228.1.0	789200	lagging	422.777	320.76		353.425
YBR295W	2	792291	36.8757	792291	796731	ARS228.2.0	792800	lagging	69.8966	561.216	384.259	277.764
YBR296C	2	799079	39.3079	796439	799079	ARS228.5.0.0	799200	leading		406.931		256.483
YBR297W	2	799979	37.9974	799979	802279	ARS229.0.0	800800	lagging	149.807	ND	182.08	88.2005
YBR296C-A	2	800735	37.5443	799995	800735	ARS229.0.0	800800	leading		ND		88.2005
YCL061C	3	22672	36.3952	18472	22672	ARS304.0.0	24000	leading		163.766		281.69
YCL058W-A	3	23060	36.5846	23060	24100	ARS304.0.0	24000	leading		1167.72		492.014
YCL059C	3	23928	36.8747	22188	23928	ARS304.0.0	24000	leading		ND		575.252
YCL057W	3	24252	36.7495	24252	27172	ARS304.0.0	24000	lagging	491.27	114.105		236.3
YCL057C-A	3	24824	37.2384	23904	24824	ARS304.0.0	24000	lagging	260.042	124.392		133.467
YCL055W	3	27396	44.8738	27396	29076	ARS304.2.0	29200	leading		123.15	280.604	299.039
YCL056C	3	27888	43.0645	26848	27888	ARS304.1.0	27200	lagging	146.396	248.048	352.997	164.495
YCL050C	3	39368	35.0803	37708	39368	ARS304.5.1	37200	lagging	142.867	88.8868	126.524	141.276
YCL046W	3	46139	35.0204	46139	47099	ARS305.3.0	50400	leading		143.071	281.47	142.795
YCL041C	3	51126	35.522	50006	51126	ARS305.3.0	50400	lagging	496.905	ND		38.7571
YCL039W	3	52124	40.159	52124	55044	ARS305.3.0	50400	lagging	135.741	469.242	70.0562	236.368
YCL038C	3	57112	36.0112	54732	57112	ARS305.3.0	50400	lagging	59.0279	88.3636	58.5589	85.3182
YCL031C	3	66120	35.1748	64440	66120	ARS306.3.1	76800	leading		832.98		270.323
YCL024W	3	78605	36.912	78605	82445	ARS306.4.0	78800	lagging	448.279	414.38	191.025	119.247
YCL025C	3	78481	36.912	75801	78481	ARS306.3.1	76800	lagging	51.7521	356.596	395.981	281.927
YCL018W	3	90613	37.6297	90613	92713	ARS306.4.0	78800	lagging	159.122	441.864	293.468	136.982
YCL017C	3	94881	41.1726	92301	94881	ARS306.4.0	78800	lagging	711.184	247.56		157.705
YCL014W	3	95685	40.3592	95685	101385	ARS307.1.0	106000	leading		121.723		177.78
YCL016C	3	96297	39.9014	94337	96297	ARS307.1.0	106000	leading		67.0923		79.2107
YCL004W	3	108517	36.3605	108517	111937	ARS308.0.0	110800	leading		915.205		515.522
YCL001W	3	111341	41.4762	111341	112641	ARS308.0.0	110800	lagging	603.443	105.183	1197.02	171.348
YCL002C	3	112225	40.4116	110425	112225	ARS308.0.0	110800	lagging	ND	1630.32	ND	246.949
YCL001W-A	3	112577	39.0408	112577	113677	ARS308.0.0	110800	lagging	470.149	260.301	328.63	115.387
YCL001W-B	3	113267	36.7176	113267	114147	ARS308.1.0	116000	leading		142.997		143.317
YCR001W	3	115182	38.3895	115182	116122	ARS308.1.0	116000	leading		294.099		736.098
YCR003W	3	118101	37.1066	118101	119421	ARS308.2.0	118400	lagging	714.667	223.835	363.755	123.743
YCR002C	3	118905	35.9782	117225	118905	ARS308.2.0	118400	leading		144.969	242.348	150.716
YCR004C	3	121025	43.1259	119305	121025	ARS308.2.0	118400	lagging	80.6138	482.108	405.261	126.899
YCR005C	3	122897	40.2501	120717	122897	ARS308.2.0	118400	lagging	83.7186	154.663	133.981	290.192
YCR006C	3	123500	39.2749	122400	123500	ARS308.2.0	118400	lagging	53.8806	98.6136		108.218
YCR008W	3	127509	35.8937	127509	130669	ARS309.0.0	128000	lagging	ND	168.514	231.405	352.618
YCR012W	3	137173	41.691	137173	139193	ARS309.3.0	137200	lagging	102.45	339.142	523.143	145.972
YCR011C	3	137521	41.2777	133541	137521	ARS309.2.0	133600	lagging	525.303	1132.23	216.211	294.996
YCR016W	3	143101	41.2202	143101	144801	ARS309.3.0	137200	lagging	108.572	ND	159.003	1036.21
YCR015C	3	142705	41.016	140965	142705	ARS309.3.0	137200	lagging	47.2717	365.666	357.762	53.7299
YCR019W	3	152197	42.5486	152197	154157	ARS310.0.0	167600	leading		157.775		153.026
YCR018C-A	3	152359	42.5486	151479	152359	ARS309.3.0	137200	lagging	ND	1400.29		98.6761
YCR020C	3	155156	36.4973	153876	155156	ARS310.0.0	167600	leading		58.29		353.398
YCR020W-B	3	154773	37.2065	154773	156053	ARS310.0.0	167600	leading		ND		ND
YCR020C-A	3	155593	35.9942	154693	155593	ARS310.0.0	167600	leading		1170.39		260.856
YCR021C	3	157713	37.4391	155893	157713	ARS310.0.0	167600	leading		116.219		399.972
YCR022C	3	158260	38.2534	157280	158260	ARS310.0.0	167600	leading		51.7729		180.792
YCR023C	3	160953	35.7166	158173	160953	ARS310.0.0	167600	leading		103.934		246.831
YCR024C-B	3	163360	35.6068	162460	163360	ARS310.0.0	167600	leading		52.7815		162.661
YCR024C-A	3	163562	35.6068	162802	163562	ARS310.0.0	167600	leading		65.0451		166.46
YCR025C	3	164351	38.6866	163311	164351	ARS310.0.0	167600	leading		135.171		273.816
YCR027C	3	168681	43.9146	166601	168681	ARS310.0.0	167600	lagging	24.3201	32.1058	23.9748	42.7004
YCR042C	3	205913	44.0014	201013	205913	ARS314.0.0	203200	lagging	157.334	339.736	96.5068	252.421
YCR043C	3	207193	43.4001	206033	207193	ARS314.0.0	203200	lagging	692.702	499.543		ND
YCR044C	3	208473	41.8199	206713	208473	ARS314.0.0	203200	lagging	186.295	208.325		211.78
YCR045W-A	3	208246	42.0956	208246	209226	ARS314.5.0.1	212000	leading		1435.17		337.344
YCR045C	3	210105	41.098	208005	210105	ARS314.5.0.1	212000	leading		687.202		358.245
YCR046C	3	210945	40.1719	209645	210945	ARS314.5.0.1	212000	leading		387.984	108.069	281.771
YCR047W-A	3	210796	40.5895	210796	211636	ARS314.5.0.1	212000	leading		ND		352.886
YCR048W	3	211341	39.6671	211341	213981	ARS314.5.0.1	212000	lagging	379.584	ND	239.861	121.245
YCR047C	3	212145	37.2297	210405	212145	ARS314.5.0.1	212000	leading		364.527		132.922
YCR053W	3	216133	39.6018	216133	218453	ARS314.5.3.0	219200	leading		240.487	150.418	134.077
YCR063W	3	227789	38.6996	227789	229409	ARS315.3.0	228400	lagging	678.558	568.311		131.854
YCR065W	3	228773	37.9343	228773	231453	ARS315.3.0	228400	lagging	58.2829	211.757	588.054	181.307
YCR064C	3	229000	37.6055	227960	229000	ARS315.3.0	228400	lagging	722.138	549.03		77.3245
YCR066W	3	230949	37.3383	230949	233209	ARS315.3.0	228400	lagging	ND	892.95	ND	291.177
YCR068W	3	236573	41.3494	236573	239013	ARS315.3.0	228400	lagging	689.023	375.286	103.179	309.683
YCR067C	3	236929	41.341	232869	236929	ARS315.3.0	228400	lagging	90.0009	406.243	294.637	254.878
YCR069W	3	238389	42.0826	238389	240229	ARS315.3.0	228400	lagging	ND	569.982	79.457	311.619
YDL235C	4	34536	43.4837	33176	34536	ARS402.5.0.0	2	lagging	480.961	2761.33	138.339	205.891
YDL234C	4	37096	44.3016	34016	37096	ARS402.5.0.0	2	lagging	912.057	1101.01	318.466	140.649
YDL232W	4	37964	44.4294	37964	39024	ARS402.5.0.0	2	lagging	389.363	378.477		219.095
YDL229W	4	43540	42.1622	43540	46140	ARS404.1.1	42800	lagging	63.4069	82.7393	456.376	147.237
YDL228C	4	46418	40.5612	45138	46418	ARS404.3.0	46400	leading		175.724		482.194
YDL227C	4	48531	43.6742	46131	48531	ARS404.3.0	46400	lagging	456.118	1119.27	ND	284.748
YDL213C	4	78744	44.002	77104	78744	ARS404.7.2	64400	lagging	3638.78	1594.36		1431.23
YDL211C	4	80984	38.1267	79064	80984	ARS405.1.0	80000	lagging	207.539	289.936	210.308	167.963
YDL210W	4	84036	35.3462	84036	86076	ARS405.2.0	84800	lagging	292.789	178.312	135.255	107.171
YDL195W	4	106588	43.0599	106588	111308	ARS405.5.2.1	106000	lagging	283.591	788.56	254.514	ND
YDL197C	4	107368	40.6724	104648	107368	ARS405.5.2.1	106000	lagging	541.57	730.806	245.538	118.138
YDL194W	4	110868	37.2236	110868	114408	ARS405.5.3.0	111600	lagging	685.371	798.929	237.469	60.7479
YDL193W	4	114068	44.2017	114068	116128	ARS405.5.3.0	111600	lagging	989.356	695.687	314.332	280.344
YDL192W	4	115764	43.3425	115764	117164	ARS405.5.3.0	111600	lagging	386.475	416.864		388.18
YDL191W	4	117116	37.5482	117116	118836	ARS405.5.3.0	111600	lagging	147.038	138.572		213.8
YDL189W	4	121468	37.419	121468	123908	ARS406.1.0	124000	leading		ND		174.572
YDL190C	4	122296	38.3919	118496	122296	ARS406.1.0	124000	leading		109.372	16.2447	332.859
YDL186W	4	125116	35.8351	125116	126576	ARS406.2.0	125200	lagging	555.021	ND	213.215	56.9862
YDL188C	4	125680	37.4232	123700	125680	ARS406.1.0	124000	lagging	299.642	651.081		669.919
YDL187C	4	126338	38.7753	125378	126338	ARS406.2.0	125200	lagging	376.418	140.153	ND	36.1806
YDL185W	4	126180	38.7753	126180	130300	ARS406.3.0	126400	lagging	109.428	420.725	121.057	257.166
YDL185C-A	4	127335	42.0194	126475	127335	ARS406.3.0	126400	lagging	700.996	706.826	80.3694	282.522
YDL182W	4	132908	41.7635	132908	134888	ARS407.0.0	132000	lagging	674.54	122.244		93.3295
YDL145C	4	198960	40.4716	194260	198960	ARS409.0.0	202000	leading		466.608	200.572	308.204
YDL143W	4	199460	39.4769	199460	201820	ARS408.4.0	161200	lagging	331.764	298.197		167.146
YDL144C	4	200280	37.8103	198440	200280	ARS409.0.0	202000	leading		204.446		195.078
YDL136W	4	217028	44.8997	217028	218628	ARS409.6.1	214400	lagging	319.975	374.864	119.517	342.295
YDL135C	4	219864	42.8301	218244	219864	ARS409.6.1	214400	lagging	219.896	561.132	65.3705	231.863
YDL134C	4	221800	43.4975	219440	221800	ARS409.6.1	214400	lagging	440.457	454.036	229.676	295.26
YDL133W	4	221780	43.4975	221780	223960	ARS409.6.1	214400	lagging	322.237	548.248	321.001	309.577
YDL133C-A	4	222400	42.9052	221380	222400	ARS409.6.1	214400	lagging	318.274	424.75	230.157	241.895
YDL132W	4	223500	43.8823	223500	226920	ARS409.3.0.0	232000	leading		117.357		358.74
YDL128W	4	232068	43.6846	232068	234168	ARS409.3.0.0	232000	lagging	619.632	311.645	238.804	570.582
YDL118W	4	246801	44.5996	246801	247821	ARS409.5.0.0	236000	lagging	523.729	393.043	378.79	181.274
YDL117W	4	247700	43.6801	247700	251440	ARS410.1.0	250400	leading		369.453	217.204	243.564
YDL119C	4	248280	43.6742	246440	248280	ARS410.1.0	250400	leading		879.423	321.518	241.561
YDL116W	4	251012	43.4302	251012	253912	ARS410.2.1	252400	lagging	393.29	229.245	397.047	577.603
YDL114W-A	4	254434	43.2542	254434	255174	ARS410.4.0	254400	lagging	467.46	718.74	280.416	101.587
YDL114W	4	255103	43.8941	255103	256663	ARS410.4.0	254400	lagging	190.781	465.105	293.133	66.7658
YDL082W	4	307868	43.2968	307868	309628	ARS412.0.0	310000	leading		190.161		202.008
YDL083C	4	308328	40.0373	306528	308328	ARS412.0.0	310000	leading		512.808		382.544
YDL079C	4	315328	35.1114	312648	315328	ARS412.1.1	317600	leading		247.76	166.366	580.189
YDL077C	4	320808	38.128	316728	320808	ARS412.1.1	317600	lagging	328.307	278.768	144.012	399.692
YDL075W	4	321692	38.1258	321692	323172	ARS412.2.1	323600	leading		385.714	628.567	320.828
YDL076C	4	322192	37.5978	320332	322192	ARS412.2.0	320400	lagging	71.4267	ND	95.7628	604.325
YDL073W	4	325940	36.6415	325940	329720	ARS413.0.0	327600	lagging	154.58	524.942	530.38	634.996
YDL070W	4	330492	37.5873	330492	333252	ARS413.1.0	330000	lagging	934.572	515.703	451.032	225.665
YDL072C	4	331016	35.045	329496	331016	ARS413.1.0	330000	lagging	1012.75	588.449	443.028	360.974
YDL066W	4	334180	35.4087	334180	336320	ARS413.2.0	333600	lagging	130.715	86.7376	209.129	206.166
YDL067C	4	335112	36.7864	333832	335112	ARS413.2.0	333600	lagging	ND	318.544	230.101	244.941
YDL064W	4	336940	39.666	336940	338360	ARS413.5.0.0	338800	leading		303.014	61.6649	188.507
YDL065C	4	337816	40.3281	336056	337816	ARS413.2.0	333600	lagging	760.546	425.915	58.4053	460.748
YDL062W	4	339356	38.7144	339356	340416	ARS413.5.0.0	338800	lagging	100.454	173.575		ND
YDL063C	4	340744	38.4646	337944	340744	ARS413.5.0.0	338800	lagging	257.105	295.286	122.995	129.454
YDL060W	4	341100	38.41	341100	344180	ARS413.5.1.0	343200	leading		350.106		111.982
YDL061C	4	341776	38.4811	340276	341776	ARS413.5.1.0	343200	leading		311.156		ND
YDL036C	4	389400	44.1241	387220	389400	ARS414.0.0	408000	leading		326.843		157.788
YDL034W	4	391280	43.2319	391280	392260	ARS414.0.0	408000	leading		421.311		ND
YDL035C	4	392840	43.4662	388920	392840	ARS414.0.0	408000	leading		239.152		161.088
YDL032W	4	393187	43.4662	393187	394127	ARS414.0.0	408000	leading		88.8399		266.363
YDL031W	4	393676	43.0703	393676	397416	ARS414.0.0	408000	leading		320.395		252.904
YDL033C	4	394456	42.3923	392356	394456	ARS414.0.0	408000	leading		258.373		296.337
YDL030W	4	396956	35.9578	396956	399296	ARS414.0.0	408000	leading		622.304		39.1875
YDL029W	4	398796	36.4533	398796	401036	ARS414.0.0	408000	leading		76.3551		182.447
YDL028C	4	403920	36.1736	400720	403920	ARS414.0.0	408000	leading		372.637		225.991
YDL026W	4	404246	36.3937	404246	405186	ARS414.0.0	408000	leading		112.515		272.636
YDL025W-A	4	404907	36.3331	404907	405647	ARS414.0.0	408000	leading		ND		390.111
YDL027C	4	405496	35.8208	403356	405496	ARS414.0.0	408000	leading		127.985		457.842
YDL023C	4	412578	36.2536	411618	412578	ARS414.1.0	410400	lagging	235.13	138.156		127.749
YDL021W	4	413444	35.7543	413444	415204	ARS414.2.1	414800	leading		315.217	41.5487	277.929
YDL019C	4	422256	35.2188	417376	422256	ARS414.2.1	414800	lagging	74.7012	581.149	190.168	154.025
YDL017W	4	423596	38.392	423596	425916	ARS415.1.0	433200	leading		119.327		183.988
YDL018C	4	424080	40.766	422520	424080	ARS414.2.1	414800	lagging	186.083	1845.37	84.6716	1711.01
YDL012C	4	432560	42.6413	430800	432560	ARS415.1.0	433200	leading		272.134		230.251
YDL008W	4	432972	43.2529	432972	434192	ARS415.1.0	433200	lagging	ND	178.861	415.239	165.849
YDL011C	4	433128	43.2529	432168	433128	ARS415.1.0	433200	leading		359.649		275.868
YDL009C	4	433745	44.6703	432785	433745	ARS415.1.0	433200	lagging	ND	367.021	510.19	142.507
YDL003W	4	444060	35.0311	444060	446620	ARS415.1.3	437200	lagging	327.473	657.149	270.474	123.495
YDL001W	4	447412	36.7669	447412	449512	ARS415.1.3	437200	lagging	228.516	2542.86	113.815	104.487
YDR012W	4	471308	35.5989	471308	473148	ARS416.1.2	466000	lagging	175.408	109.032		56.5412
YDR013W	4	472652	36.8025	472652	473992	ARS417.0.0	478400	leading		25.6775		292.617
YDR014W	4	473492	36.9679	473492	476172	ARS417.0.0	478400	leading		233.925		237.789
YDR018C	4	484369	35.0881	482369	484369	ARS417.1.0	482800	lagging	214.637	590.759	553.12	166.586
YDR019C	4	485862	40.307	484022	485862	ARS417.2.0	484400	lagging	490.973	ND	274.002	507.297
YDR021W	4	486205	41.7634	486205	488185	ARS417.3.0	486000	lagging	152.414	57.2514	87.2336	258.877
YDR020C	4	486941	43.3512	485621	486941	ARS417.3.0	486000	lagging	378.48	3414.74		2171.52
YDR023W	4	489005	40.4397	489005	491025	ARS417.4.0	489200	lagging	147.993	201.176		ND
YDR022C	4	489257	39.0175	487917	489257	ARS417.4.0	489200	leading		72.0348	247.451	227.267
YDR024W	4	490514	35.3148	490514	491634	ARS417.4.1	490400	lagging	56.8267	285.046		169.085
YDR025W	4	491012	35.2657	491012	492452	ARS417.4.1	490400	lagging	163.07	501.709		278.365
YDR031W	4	502973	37.562	502973	504053	ARS417.5.0.0	506000	leading		413.77	810.024	427.144
YDR030C	4	503801	38.6438	501521	503801	ARS417.5.0.0	506000	leading		554.831	462.425	354.671
YDR032C	4	505322	38.8444	503802	505322	ARS417.5.0.0	506000	leading		360.645	162.891	197.887
YDR033W	4	507310	38.1018	507310	509710	ARS417.5.0.0	506000	lagging	654.992	736.496	344.664	352.417
YDR041W	4	539270	37.9418	539270	540710	ARS418.0.0	545600	leading		79.0749		406.978
YDR040C	4	538964	38.9512	535064	538964	ARS418.0.0	545600	leading		65.7968		234.195
YDR042C	4	541700	37.2811	540460	541700	ARS418.0.0	545600	leading		83.2597		747.43
YDR057W	4	565382	38.8377	565382	567702	ARS419.3.0	567200	leading		272.376	2538.1	212.052
YDR056C	4	566218	37.8007	564898	566218	ARS419.1.0	564000	lagging	ND	684.549		318.507
YDR058C	4	569234	37.2763	567474	569234	ARS419.3.0	567200	lagging	376.095	356.626	248.757	305.597
YDR060W	4	570070	37.1105	570070	573930	ARS419.5.0	570800	lagging	ND	ND	166.305	138.835
YDR059C	4	570330	37.1105	569010	570330	ARS419.4.0	568800	lagging	51.0202	81.9533	ND	ND
YDR061W	4	573654	39.811	573654	575934	ARS419.5.0	570800	lagging	109.443	1009.45	256.914	108.844
YDR064W	4	578918	44.5254	578918	580678	ARS419.5.0	570800	lagging	118.445	416.788	272.448	183.129
YDR089W	4	621487	43.1594	621487	624927	ARS420.3.1	624800	leading		582.752	455.935	239.932
YDR090C	4	626611	42.0756	624611	626611	ARS420.3.1	624800	lagging	530.178	498.551	235.354	223.796
YDR092W	4	629303	40.9247	629303	630823	ARS420.6.0	630800	leading		123.608	237.646	153.416
YDR091C	4	629099	41.4998	626239	629099	ARS420.3.1	624800	lagging	298.556	144.55	218.479	96.1466
YDR093W	4	630779	37.2441	630779	636239	ARS420.6.0	630800	lagging	206.676	262.353	455.42	260.237
YDR094W	4	635337	39.1268	635337	636297	ARS420.8.0	633600	lagging	102.43	1414.72	319.857	708.42
YDR096W	4	636079	38.9023	636079	639979	ARS421.0.0	640400	leading		842.515	381.285	73.7644
YDR095C	4	637024	39.856	635984	637024	ARS421.0.0	640400	leading		798.826	5326.49	408.327
YDR121W	4	692951	41.4956	692951	694351	ARS422.2.0	693600	lagging	759.61	513.95	133.282	958.971
YDR120C	4	693739	40.0619	691219	693739	ARS422.2.0	693600	leading		532.688		924.597
YDR122W	4	693903	40.0619	693903	698163	ARS422.2.0	693600	lagging	194.347	258.684	502.672	156.845
YDR124W	4	699239	39.3997	699239	701519	ARS422.5.0	701600	leading		135.545	258.688	94.8279
YDR123C	4	700051	37.4666	697891	700051	ARS422.5.0	701600	leading		70.4646	ND	58.9996
YDR126W	4	702719	37.8333	702719	704539	ARS422.5.0	701600	lagging	739.051	360.72	ND	ND
YDR125C	4	703235	40.0704	700115	703235	ARS422.5.0	701600	lagging	295.835	208.427	201.41	143.872
YDR127W	4	703903	40.5299	703903	709423	ARS422.5.0	701600	lagging	302.9	1622.28	612.371	284.673
YDR143C	4	744531	44.9501	741911	744531	ARS422.5.3.0	747200	leading		336.232		289.973
YDR147W	4	750703	43.3345	750703	753383	ARS423.0.0	752000	lagging	113.695	147.489	144.402	380.352
YDR146C	4	751411	41.3839	748451	751411	ARS422.5.4.0	748800	lagging	178.65	279.479	147.917	223.762
YDR171W	4	806055	43.5265	806055	807955	ARS425.0.0	803200	lagging	156.996	755.071		234.988
YDR211W	4	884160	43.3419	884160	887100	ARS427.5.0.1	898800	leading		414.125	185.579	270.384
YDR212W	4	886648	38.0577	886648	889128	ARS427.5.0.1	898800	leading		162.846	373.312	155.754
YDR213W	4	889024	38.07	889024	892744	ARS427.5.0.1	898800	leading		183.387		195.415
YDR214W	4	892248	41.2475	892248	894128	ARS427.5.0.1	898800	leading		664.755		106.217
YDR216W	4	894008	40.0191	894008	899588	ARS427.5.0.1	898800	leading		505.156		264.789
YDR215C	4	894998	40.096	893978	894998	ARS427.5.0.1	898800	leading		334.885		402.723
YDR220C	4	907789	35.0149	906869	907789	ARS427.5.1.0	908800	leading		832.733		504.164
YDR225W	4	914928	35.8367	914928	916208	ARS428.1.0	914800	lagging	439.937	370.134		620.15
YDR230W	4	925719	37.6875	925719	926699	ARS429.5.0.0	931600	leading		424.596		ND
YDR232W	4	926696	40.8802	926696	929396	ARS429.5.0.0	931600	leading		318.899	259.069	291.812
YDR231C	4	927444	40.0545	926104	927444	ARS429.5.0.0	931600	leading		289.432	229.679	ND
YDR234W	4	930504	44.2034	930504	933444	ARS429.5.0.0	931600	lagging	100.114	260.219	ND	ND
YDR235W	4	932984	44.396	932984	935504	ARS429.5.0.0	931600	lagging	193.099	398.796	498.232	390.566
YDR266C	4	1002732	36.7487	999852	1002732	ARS430.0.0	1011200	leading		777.811		246.415
YDR268W	4	1003456	36.2067	1003456	1005296	ARS430.0.0	1011200	leading		142.042		30.4941
YDR267C	4	1004052	36.1387	1002212	1004052	ARS430.0.0	1011200	leading		281.043		178.855
YDR270W	4	1005080	36.0623	1005080	1008860	ARS430.0.0	1011200	leading		292.445		144.48
YDR269C	4	1006484	37.2693	1005524	1006484	ARS430.0.0	1011200	leading		133.618		177.329
YDR276C	4	1014244	35.5232	1012924	1014244	ARS430.1.0	1013200	lagging	365.749	156.505	122.969	124.849
YDR277C	4	1016380	37.1133	1014060	1016380	ARS430.1.0	1013200	lagging	348.915	677.616		286.169
YDR278C	4	1017814	37.368	1016874	1017814	ARS430.2.0	1016000	lagging	317.048	214.284	88.4401	291.752
YDR279W	4	1018736	38.2355	1018736	1020536	ARS430.2.0	1016000	lagging	552.722	121.283		400.992
YDR280W	4	1020112	39.8121	1020112	1021832	ARS430.5.0.0	1022400	leading		89.7337		85.9191
YDR282C	4	1025260	38.7925	1023340	1025260	ARS430.5.0.0	1022400	lagging	229.275	350.556	113.27	1584.17
YDR292C	4	1045660	43.561	1042860	1045660	ARS430.5.4.1	1046400	leading		646.689	553.147	202.163
YDR293C	4	1050740	38.203	1045260	1050740	ARS430.5.4.1	1046400	lagging	369.179	313.815	523.545	172.969
YDR296W	4	1054648	36.3429	1054648	1056088	ARS431.0.1	1058000	leading		159.143		ND
YDR295C	4	1055404	37.2282	1052424	1055404	ARS431.0.1	1058000	leading		2232.14		134.872
YDR297W	4	1055896	37.2358	1055896	1057876	ARS431.0.1	1058000	leading		283.664	130.622	435.376
YDR299W	4	1059072	38.347	1059072	1061432	ARS431.1.0	1058800	lagging	256.361	172.54	270.531	117.048
YDR298C	4	1059492	37.655	1057872	1059492	ARS431.0.1	1058000	lagging	175.036	237.783		99.2665
YDR301W	4	1062776	40.9441	1062776	1067656	ARS431.1.0	1058800	lagging	486.793	500.381	347.745	194.51
YDR300C	4	1063364	42.0741	1061284	1063364	ARS431.1.0	1058800	lagging	393.694	325.53	336.113	162.466
YDR319C	4	1106428	42.7525	1104808	1106428	ARS431.5.0.3	1104800	lagging	266.725	230.394	383.417	351.216
YDR335W	4	1140304	36.7743	1140304	1145064	ARS431.7.1.0	1150800	leading		468.388		327.513
YDR338C	4	1150020	40.7903	1147120	1150020	ARS431.7.1.0	1150800	leading		233.033		570.943
YDR340W	4	1150375	40.7903	1150375	1151315	ARS431.7.1.0	1150800	lagging	ND	1603.5	322.904	1116.67
YDR341C	4	1154172	35.9938	1151492	1154172	ARS431.7.1.0	1150800	lagging	48.9646	32.931	222.777	167.86
YDR348C	4	1172556	41.293	1170036	1172556	ARS432.5.1.1	1167200	lagging	457.436	379.978	351.076	214.36
YDR349C	4	1174772	39.0876	1172172	1174772	ARS432.5.1.1	1167200	lagging	116.678	90.8261	189.624	238.453
YDR351W	4	1177936	41.5299	1177936	1181536	ARS432.5.1.1	1167200	lagging	304.38	207.472	154.213	260.189
YDR350C	4	1178708	42.4168	1175868	1178708	ARS432.5.1.1	1167200	lagging	457.387	290.318	301.406	270.166
YDR352W	4	1181120	42.6954	1181120	1183080	ARS432.5.1.1	1167200	lagging	825.296	253.451	180.549	133.004
YDR353W	4	1182728	44.7643	1182728	1184608	ARS432.5.1.1	1167200	lagging	458.037	356.87	416.142	128.796
YDR382W	4	1238896	40.5819	1238896	1240096	ARS433.0.0	1239600	leading		ND		94.9531
YDR402C	4	1274195	44.6113	1272095	1274195	ARS434.0.0	1274000	leading		ND		1150.04
YDR403W	4	1274880	41.7661	1274880	1276440	ARS434.0.1	1275200	lagging	227.982	659.35		172.96
YDR405W	4	1277072	41.9128	1277072	1278652	ARS434.0.3	1277600	lagging	565.265	563.737		526.572
YDR404C	4	1277860	43.2582	1276440	1277860	ARS434.0.3	1277600	leading		447.452		219.096
YDR406W	4	1278702	44.5879	1278702	1283922	ARS434.0.3	1277600	lagging	188.348	672.969		247.761
YDR410C	4	1293644	36.5447	1292184	1293644	ARS435.0.0	1300800	leading		ND		ND
YDR412W	4	1294120	35.7131	1294120	1295680	ARS435.0.0	1300800	leading		238.955		182.132
YDR411C	4	1294956	36.4627	1293196	1294956	ARS435.0.0	1300800	leading		256.693		112.797
YDR413C	4	1295903	38.5798	1294703	1295903	ARS435.0.0	1300800	leading		491.84		264.847
YDR414C	4	1297178	39.8242	1295458	1297178	ARS435.0.0	1300800	leading		319.483		107.423
YDR416W	4	1297848	38.5968	1297848	1301088	ARS435.0.0	1300800	leading		314.585	184.15	664.391
YDR415C	4	1298700	38.801	1296860	1298700	ARS435.0.0	1300800	leading		158.376		567.95
YDR418W	4	1301056	36.1023	1301056	1302356	ARS435.0.0	1300800	lagging	555.787	239.993	320.873	246.432
YDR419W	4	1302656	39.0557	1302656	1305516	ARS435.2.0	1305600	leading		346.742		253.708
YDR417C	4	1302418	39.0557	1301418	1302418	ARS435.0.0	1300800	lagging	432.104	246.691	584.721	423.275
YDR439W	4	1339168	42.1562	1339168	1340848	ARS437.0.2	1339600	lagging	431.353	416.373		411.033
YDR440W	4	1341896	40.3285	1341896	1344436	ARS437.1.0	1346400	leading		127.269	283.902	243.864
YDR442W	4	1345139	38.0015	1345139	1346159	ARS437.1.0	1346400	leading		504.197	342.912	486.653
YDR441C	4	1345708	36.6543	1344088	1345708	ARS437.1.0	1346400	leading		301.07	75.1202	147.167
YDR444W	4	1349704	43.4661	1349704	1352464	ARS437.2.0	1349600	lagging	759.918	868.468		204.138
YDR443C	4	1350516	41.7689	1345236	1350516	ARS437.2.0	1349600	leading		409.644	190.704	170.453
YDR446W	4	1353217	39.4525	1353217	1354757	ARS437.4.0	1354000	leading		60.4946		ND
YDR445C	4	1353081	39.2241	1352041	1353081	ARS437.3.0	1351600	lagging	217.02	98.395		200.249
YDR448W	4	1355464	43.3252	1355464	1357564	ARS437.5.1	1355600	lagging	459.095	100.368	643.361	366.465
YDR447C	4	1356100	43.169	1354640	1356100	ARS437.5.0	1354800	lagging	330.654	61.4404	304.2	258.413
YDR450W	4	1359384	42.113	1359384	1361024	ARS437.8.0	1360000	lagging	836.948	436.587		98.1228
YDR449C	4	1359444	42.113	1357304	1359444	ARS437.7.1	1358000	lagging	945.977	100.991	120.655	175.16
YDR452W	4	1362232	42.8007	1362232	1365172	ARS437.8.0	1360000	lagging	131.178	250.284	902.145	159.713
YDR451C	4	1362724	42.5986	1360784	1362724	ARS437.8.0	1360000	lagging	81.4123	498.214	431.664	218.385
YDR458C	4	1382588	38.6089	1379748	1382588	ARS439.5.0.0	1383600	leading		543.48	888.893	423.24
YDR460W	4	1383168	38.3034	1383168	1385028	ARS439.5.0.0	1383600	lagging	583.206	248.581		269.151
YDR459C	4	1384044	41.387	1381984	1384044	ARS439.5.0.0	1383600	leading		265.087		67.1377
YDR461W	4	1384608	43.9358	1384608	1385368	ARS439.5.0.0	1383600	lagging	162.295	349.779		198.893
YDR467C	4	1398401	44.2917	1397441	1398401	ARS440.1.0	1402800	leading		199.267		120.456
YDR469W	4	1398496	44.2917	1398496	1399936	ARS440.1.0	1402800	leading		418.736		175.568
YDR495C	4	1441700	43.231	1437940	1441700	ARS441.0.0	1444400	leading		328.281		210.871
YDR496C	4	1443932	39.3838	1441212	1443932	ARS441.0.0	1444400	leading		697.488	590.291	300.883
YDR497C	4	1446044	39.9764	1443484	1446044	ARS441.0.1	1446000	leading		306.32		616.475
YDR499W	4	1447304	43.1674	1447304	1450224	ARS441.1.1	1450800	leading		532.122	69.921	106.052
YDR498C	4	1447532	43.1674	1445632	1447532	ARS441.0.1	1446000	lagging	309.191	909.643		228.081
YDR501W	4	1450728	38.4114	1450728	1453208	ARS441.1.1	1450800	lagging	238.046	247.851	200.582	225.438
YDR500C	4	1451380	36.5065	1449960	1451380	ARS441.1.1	1450800	leading		329.435	196.13	ND
YDR502C	4	1454996	37.1808	1452956	1454996	ARS441.1.1	1450800	lagging	652.871	278.872	ND	87.9747
YDR505C	4	1459712	38.2522	1456552	1459712	ARS442.1.0	1462400	leading		204.909		102.635
YDR507C	4	1466396	36.0789	1461996	1466396	ARS442.1.0	1462400	lagging	205.691	181.722	49.5966	263.652
YDR510W	4	1468816	36.7141	1468816	1469916	ARS442.4.1	1468800	lagging	254.053	493.221		109.9
YDR508C	4	1468988	36.7141	1466108	1468988	ARS442.4.1	1468800	leading		174.465		359.369
YDR511W	4	1469488	37.9988	1469488	1470568	ARS442.4.2	1469600	lagging	155.853	488.304	292.094	128.737
YDR510C-A	4	1470303	40.811	1469563	1470303	ARS442.4.2	1469600	lagging	291.601	564.566	301.556	485.026
YDR513W	4	1470456	42.4601	1470456	1471656	ARS442.4.2	1469600	lagging	468.589	578.727		355.662
YDR512C	4	1471324	44.7449	1470284	1471324	ARS442.4.2	1469600	lagging	559.616	1181.31	224.215	189.061
YDR515W	4	1472704	41.7847	1472704	1474864	ARS442.5.0	1472000	lagging	706.605	493.248	125.009	157.467
YDR514C	4	1473540	40.7492	1471320	1473540	ARS442.5.0	1472000	lagging	271.759	377.186		553.683
YDR528W	4	1493776	41.74	1493776	1496076	ARS447.0.0	1500800	leading		239.171		81.5416
YDR529C	4	1497084	44.1841	1495824	1497084	ARS447.0.0	1500800	leading		705.642		199.75
YDR531W	4	1497664	41.4417	1497664	1499544	ARS447.0.0	1500800	leading		628.158		ND
YDR530C	4	1498460	40.1832	1496520	1498460	ARS447.0.0	1500800	leading		334.053		51.9515
YDR532C	4	1501060	44.7085	1499220	1501060	ARS447.0.0	1500800	leading		357.924		296.041
YDR533C	4	1502884	43.8742	1501124	1502884	ARS447.0.0	1500800	lagging	730.137	528.033	182.691	202.036
YDR534C	4	1505391	43.2565	1503171	1505391	ARS447.1.0	1504400	leading		326	269.747	205.163
YEL056W	5	46604	41.76	46604	48584	ARS507.0.0	55600	leading		500.336		280.941
YEL057C	5	46352	41.5284	44772	46352	ARS507.0.0	55600	leading		471.289		502.198
YEL055C	5	52104	38.8806	48144	52104	ARS507.0.0	55600	leading		160.845		711.851
YEL053W-A	5	52407	37.5014	52407	53387	ARS507.0.0	55600	leading		263.996		377.044
YEL052W	5	56036	35.5905	56036	58236	ARS507.0.0	55600	lagging	44.1318	47.1912	1496.58	1074.4
YEL053C	5	56680	35.1392	53680	56680	ARS507.0.0	55600	leading		227.204	137.7	427.212
YEL051W	5	57820	36.5881	57820	59420	ARS507.1.1	59200	leading		380.395	984.244	113.548
YEL050C	5	61416	41.6774	59356	61416	ARS507.1.1	59200	lagging	524.327	549.756		724.312
YEL047C	5	67320	36.8503	65260	67320	ARS507.5.0	66000	lagging	1007.59	118.211	243.408	323.998
YEL044W	5	68548	41.773	68548	70508	ARS507.6.0	67200	lagging	460.798	600.811	178.852	146.641
YEL046C	5	69291	43.3323	67491	69291	ARS507.6.0	67200	lagging	415.87	398.467	445.757	299.191
YEL045C	5	69764	43.9819	68704	69764	ARS507.6.0	67200	lagging	675.265	422.744	106.318	146.641
YEL043W	5	69932	43.9819	69932	73572	ARS507.6.0	67200	lagging	91.5615	316.706		130.137
YEL040W	5	77532	41.3685	77532	79712	ARS508.0.0	80800	leading		171.475		512.359
YEL038W	5	79876	42.8798	79876	81316	ARS508.0.0	80800	leading		296.078		204.957
YEL039C	5	80672	39.9251	79412	80672	ARS508.0.0	80800	leading		297.373		222.675
YEL037C	5	83280	39.1035	81060	83280	ARS508.0.1	83200	leading		1093.25		164.989
YEL031W	5	89732	35.3309	89732	94152	ARS508.4.1	92800	leading		142.926	118.332	114.88
YEL030W	5	93708	36.517	93708	96708	ARS508.4.2	94000	lagging	194.844	ND	102.287	74.9759
YEL030C-A	5	95396	36.4673	94456	95396	ARS508.5.0	94800	lagging	270.457	ND	147.274	463.661
YEL028W	5	98167	42.4328	98167	99267	ARS508.7.0	99600	leading		ND	155.62	340.47
YEL029C	5	98368	42.4328	96488	98368	ARS508.5.0	94800	lagging	298.684	408.715		ND
YEL027W	5	100196	38.0512	100196	101636	ARS508.8.0	100800	lagging	519.55	338.457	194.507	527.198
YEL026W	5	101284	37.6972	101284	102524	ARS508.8.0	100800	lagging	767.856	562.616	161.599	492.077
YEL014C	5	129107	41.8039	128167	129107	ARS510.0.0	140800	leading		59.9399		72.9122
YEL012W	5	131140	36.6808	131140	132780	ARS510.0.0	140800	leading		283.22		ND
YEL009C-A	5	137277	42.9076	136237	137277	ARS510.0.0	140800	leading		156.564		464.275
YEL008W	5	140011	35.5742	140011	141031	ARS510.0.0	140800	leading		143.965	1319.34	519.666
YEL009C	5	140864	35.0019	138704	140864	ARS510.0.0	140800	leading		517.983		2899.21
YEL007W	5	140996	35.0019	140996	144156	ARS510.0.0	140800	lagging	137.871	231.727	88.5272	411.645
YEL008C-A	5	141317	35.2209	140597	141317	ARS510.0.0	140800	lagging	150.848	115.205	467.867	383.48
YEL006W	5	143780	35.7594	143780	145820	ARS510.3.0	145200	leading		347.052	438.584	569.96
YEL004W	5	146404	38.0005	146404	148244	ARS510.3.1	146800	lagging	270.209	ND	625.89	130.085
YEL005C	5	147288	38.4197	145648	147288	ARS510.3.0	145200	lagging	264.014	210.459	505.501	979.314
YEL003W	5	147620	39.4251	147620	148840	ARS510.4.0	147600	lagging	253.794	1010.11	212.596	1286.36
YEL002C	5	150584	37.5398	148424	150584	ARS510.4.0	147600	lagging	ND	192.764	149.953	175.826
YEL001C	5	151528	38.1174	150088	151528	ARS510.4.0	147600	lagging	143.971	376.138	208.53	223.203
YER001W	5	152972	41.0917	152972	156172	ARS510.6.0	157600	leading		162.597		290.173
YER002W	5	156268	39.3194	156268	157728	ARS510.6.0	157600	leading		329.869		128.54
YER004W	5	158836	37.3667	158836	160616	ARS510.6.1	159200	lagging	116.144	1764.56	60.3516	541.173
YER003C	5	159656	37.5115	157316	159656	ARS510.6.0	157600	lagging	373.129	105.825	184.345	169.464
YER005W	5	159988	37.5115	159988	162628	ARS510.6.1	159200	lagging	130.35	307.002	297.063	333.316
YER006W	5	162180	41.0013	162180	164520	ARS510.6.1	159200	lagging	326.625	363.236	247.559	317.693
YER007W	5	163948	40.9864	163948	166288	ARS511.2.0	168000	leading		442.629		439.815
YER006C-A	5	165159	40.3215	164219	165159	ARS511.2.0	168000	leading		428.522		482.798
YER007C-A	5	167424	36.9608	165824	167424	ARS511.2.0	168000	leading		449.004	273.113	390.757
YER010C	5	173888	39.2011	172408	173888	ARS511.6.0	176400	leading		104.577	370.987	135.108
YER011W	5	174708	38.123	174708	176248	ARS511.6.0	176400	leading		712.643		120.577
YER012W	5	177260	39.875	177260	178700	ARS511.6.0	176400	lagging	235.552	91.6333	203.13	519.747
YER013W	5	178316	38.5912	178316	182396	ARS511.6.0	176400	lagging	1281.71	1183.36	254.586	149.83
YER014W	5	182060	38.3051	182060	184440	ARS511.5.0.0	181600	lagging	1784.51	95.3387	1253.73	363.371
YER015W	5	183972	38.9531	183972	187112	ARS511.5.0.0	181600	lagging	1742.4	531.599	487.245	376.884
YER014C-A	5	185198	40.3557	183598	185198	ARS511.5.0.0	181600	lagging	1245.31	320.212	670.183	344.951
YER016W	5	187732	41.8454	187732	189472	ARS511.5.1.1	189200	leading		211.048		279.673
YER058W	5	271228	44.472	271228	272348	ARS513.5.2.0	272000	leading		709.293	259.483	404.032
YER057C	5	271696	43.0368	270516	271696	ARS513.5.2.0	272000	leading		439.221		386.907
YER059W	5	271964	43.0368	271964	274124	ARS513.5.5.0	275600	leading		378.707		215.395
YER060W	5	273932	41.383	273932	276612	ARS513.5.5.0	275600	leading		292.122	103.215	138.038
YER060W-A	5	276069	40.3507	276069	278289	ARS513.5.5.1	277200	leading		148.996		318.944
YER061C	5	280160	41.0415	278280	280160	ARS513.7.0.0	279200	lagging	186.657	76.4144	145.912	286.441
YER063W	5	281132	41.6478	281132	282672	ARS513.7.0.1	280000	lagging	138.268	148.485		155.078
YER062C	5	281328	40.6445	279708	281328	ARS513.7.0.1	280000	lagging	337.755	287.031	69.7407	337.065
YER064C	5	284800	41.0818	282380	284800	ARS514.0.0	285200	leading		1543.02		396.773
YER065C	5	287744	42.5175	284964	287744	ARS514.0.0	285200	lagging	463.402	132.851		169.838
YER066W	5	288852	39.8178	288852	291092	ARS514.3.0	288400	lagging	508.08	294.098	278.689	100.142
YER067W	5	291276	42.0608	291276	292776	ARS514.4.0	290400	lagging	295.887	414.443	32.5542	234.103
YER068W	5	292468	44.501	292468	295048	ARS514.5.0	293600	lagging	354.818	128.384	93.6224	311.917
YER066C-A	5	292700	44.501	291560	292700	ARS514.4.0	290400	lagging	239.713	302.859	45.3432	191.333
YER067C-A	5	293060	44.8143	292100	293060	ARS514.5.0	293600	leading		95.856		189.346
YER068C-A	5	296229	43.0059	295169	296229	ARS514.5.0.0	296400	leading		169.399		212.739
YER090W	5	337364	44.6012	337364	339724	ARS514.5.9.2	330400	lagging	101.986	158.613	189.019	307.498
YER089C	5	337835	43.0632	335815	337835	ARS514.5.9.2	330400	lagging	131.348	256.627		205.082
YER090C-A	5	338906	40.7696	338186	338906	ARS514.5.9.2	330400	lagging	ND	83.6756	168.736	294.258
YER092W	5	342316	41.7895	342316	343616	ARS516.0.0	354000	leading		564.145	63.8102	354.81
YER091C	5	342728	41.7533	339508	342728	ARS514.5.9.2	330400	lagging	247.261	509.952	418.561	215.704
YER091C-A	5	343106	41.0529	342246	343106	ARS516.0.0	354000	leading		525.939	175.98	170.125
YER094C	5	349952	35.4324	348432	349952	ARS516.0.0	354000	leading		211.849		309.863
YER096W	5	351076	41.943	351076	353356	ARS516.0.0	354000	leading		142.938		174.335
YER097W	5	354635	35.0864	354635	355595	ARS516.0.0	354000	lagging	ND	ND	226.285	734.558
YER100W	5	358780	37.7863	358780	360520	ARS516.0.0	354000	lagging	192.18	108.761	70.3946	287.888
YER099C	5	359824	43.8403	357884	359824	ARS516.0.0	354000	lagging	236.651	65.6332	299.15	152.039
YER102W	5	362204	37.0911	362204	363984	ARS516.0.0	354000	lagging	125.411	114.487	257.092	164.049
YER101C	5	362352	37.0911	360272	362352	ARS516.0.0	354000	lagging	133.447	ND	89.1305	1019.05
YER103W	5	364012	42.2562	364012	366672	ARS516.0.0	354000	lagging	209.034	128.257	118.578	147.441
YER115C	5	395362	44.8739	394162	395362	ARS517.0.0	375600	lagging	163.527	445.306		117.58
YER117W	5	396172	41.5877	396172	397952	ARS517.0.3	398000	leading		203.715		339.096
YER116C	5	396667	40.0026	395207	396667	ARS517.0.3	398000	leading		444.116		151.404
YER118C	5	399752	43.7336	397632	399752	ARS517.0.3	398000	lagging	390.481	726.411	179.44	254.957
YER120W	5	400596	43.354	400596	402176	ARS517.1.0	398800	lagging	560.394	230.065		211.259
YER119C	5	401337	42.5029	399357	401337	ARS517.1.0	398800	lagging	650.902	140.062		169.13
YER119C-A	5	401733	42.1296	400733	401733	ARS517.1.0	398800	lagging	649.311	365.639		343.278
YER121W	5	401692	42.1296	401692	402972	ARS517.1.0	398800	lagging	203.861	176.099		124.122
YER122C	5	404928	44.4202	402588	404928	ARS517.1.0	398800	lagging	134.932	183.671	80.7426	319.04
YER125W	5	409172	41.531	409172	413132	ARS517.4.1	409600	lagging	128.457	338.91	73.2163	338.193
YER133W-A	5	436686	38.3621	436686	437666	ARS518.4.0	438000	leading		340.254	1638.76	554.62
YER134C	5	438344	39.0102	436984	438344	ARS518.4.0	438000	leading		1361.11		1277.5
YER136W	5	438988	38.6052	438988	441348	ARS518.5.0	439600	lagging	307.148	314.929	594.617	156.217
YER135C	5	438839	38.6052	437819	438839	ARS518.4.0	438000	lagging	330.417	420.202	697.932	645.544
YER161C	5	500888	37.8676	498968	500888	ARS520.2.0	501600	leading		280.365	88.7101	145.621
YER162C	5	503424	41.7313	500424	503424	ARS520.2.0	501600	lagging	964.79	320.613		219.355
YER164W	5	504588	42.4521	504588	510028	ARS520.4.1	504800	lagging	635.511	220.819	310.3	164.486
YER163C	5	504312	42.5463	502832	504312	ARS520.4.1	504800	leading		213.684	126.566	610.934
YER177W	5	545068	41.587	545068	546728	ARS522.2.0	547600	leading		363.649		175.874
YER178W	5	546284	44.6493	546284	548344	ARS522.2.0	547600	leading		389.839	191.395	167.851
YER180C	5	551021	44.357	549581	551021	ARS522.3.0	550000	lagging	429.832	194.47		548.786
YER186C	5	563248	39.245	561308	563248	ARS523.0.0	562400	leading		209.44	104.085	177.992
YFL034C-B	6	64552	42.4966	62712	64552	ARS603.1.1	64400	leading		420.832		168.973
YFL034W	6	64804	43.3398	64804	68964	ARS603.2.0	65200	lagging	635.492	904.461	249.751	443.579
YFL034C-A	6	65488	44.0971	64048	65488	ARS603.1.1	64400	lagging	552.367	1844.6	112.653	195.562
YFL020C	6	100092	43.5092	99092	100092	ARS603.10.4	88400	lagging	95.2515	370.945		106.988
YFL019C	6	101098	43.3007	100118	101098	ARS603.10.4	88400	lagging	ND	362.921		394.851
YFL017W-A	6	103148	40.3101	103148	104108	ARS603.5.0.0	116800	leading		77.2679		100.682
YFL018C	6	103720	39.9417	101420	103720	ARS603.10.4	88400	lagging	648.614	267.838		95.2594
YFL017C	6	104992	39.8756	103692	104992	ARS603.5.0.0	116800	leading		82.4055	250.601	407.068
YFL015W-A	6	105908	39.3372	105908	106848	ARS603.5.0.0	116800	leading		664.025	250.617	192.068
YFL014W	6	106708	38.8265	106708	107868	ARS603.5.0.0	116800	leading		410.04	187.927	240.72
YFL016C	6	106808	38.8879	104488	106808	ARS603.5.0.0	116800	leading		226.99	189.466	222.131
YFL013W-A	6	107292	39.0303	107292	108732	ARS603.5.0.0	116800	leading		75.4101	107.464	221.69
YFL015C	6	107456	39.0303	106336	107456	ARS603.5.0.0	116800	leading		431.925	514.407	241.893
YFL010W-A	6	114483	42.034	114483	115403	ARS603.5.0.0	116800	leading		305.011		388.785
YFL009W	6	115468	42.3641	115468	118668	ARS603.5.0.0	116800	lagging	727.417	457.517	190.533	91.3541
YFL010C	6	116272	39.4152	114812	116272	ARS603.5.0.0	116800	leading		390.445		128.329
YFL005W	6	129644	36.4788	129644	131324	ARS604.3.0	130800	leading		396.913	395.33	242.382
YFL004W	6	131156	38.9886	131156	134616	ARS604.3.0	130800	lagging	349.833	469.66	105.419	342.452
YFL002C	6	147464	44.8191	144844	147464	ARS605.3.1	145600	lagging	128.947	191.396	101.529	199.186
YFR001W	6	148484	40.1676	148484	149944	ARS605.5.0	148800	lagging	252.881	130.56	265.652	377.636
YFR002W	6	149492	39.4145	149492	152732	ARS605.5.0	148800	lagging	272.324	288.908	176.751	356.752
YFR004W	6	152844	40.6089	152844	154484	ARS605.6.2	155600	leading		245.076	449.073	259.834
YFR003C	6	153688	39.1613	152388	153688	ARS605.6.2	155600	leading		173.289	297.732	239.211
YFR006W	6	155620	37.4628	155620	157940	ARS605.6.2	155600	lagging	77.625	1739.9	237.56	569.835
YFR007W	6	158772	38.3183	158772	160552	ARS606.0.0	161600	leading		158.51		26.8918
YFR008W	6	160004	35.9019	160004	161684	ARS606.0.0	161600	leading		394.461		262.975
YFR009W-A	6	163368	36.5648	163368	164248	ARS606.0.0	161600	lagging	1079.54	644.342		702.046
YFR015C	6	176992	40.6109	173992	176992	ARS606.6.0	172400	lagging	281.69	257.982	257.247	384.049
YFR018C	6	184784	36.2761	182884	184784	ARS607.0.0	190000	leading		349.229		255.341
YFR026C	6	207760	35.9049	205540	207760	ARS608.0.0	207200	leading		472.483		ND
YFR030W	6	212692	37.4692	212692	216592	ARS608.2.1	217200	leading		890.159		273.713
YGL255W	7	18404	41.3091	18404	22264	ARS700.5.0.1	19600	lagging	286.617	262.28	115.94	378.914
YGL237C	7	54104	39.49	52424	54104	ARS702.0.1	51200	lagging	970.998	343.687		311.048
YGL235W	7	54778	39.7803	54778	55938	ARS702.0.1	51200	lagging	1215.59	544.188		270.823
YGL234W	7	55885	42.783	55885	59125	ARS702.2.0	58800	leading		179.747	228.512	144.059
YGL233W	7	58581	42.1922	58581	62021	ARS702.2.1	60400	leading		527.926		283.451
YGL232W	7	61573	42.0962	61573	63193	ARS702.4.0	62800	leading		147.353	425.485	302.828
YGL231C	7	64153	37.7367	62773	64153	ARS702.4.0	62800	lagging	213.284	273.393	97.1708	423.616
YGL228W	7	67045	37.8509	67045	69565	ARS702.8.0	68800	leading		ND		93.5396
YGL229C	7	67729	37.9268	64249	67729	ARS702.6.0	64800	lagging	387.193	125.779	39.729	485.586
YGL227W	7	69133	41.5066	69133	72773	ARS702.8.1	69600	lagging	157.394	191.839	158.782	94.2857
YGL190C	7	148450	42.207	145490	148450	ARS706.6.0	141600	lagging	252.474	260.162		245.238
YGL189C	7	149093	40.5267	148113	149093	ARS706.6.0	141600	lagging	445.672	340.379	175.208	190.207
YGL188C-A	7	149469	39.2061	148689	149469	ARS706.6.0	141600	lagging	141.133	86.006	211.008	57.7359
YGL188C	7	150021	38.3692	149221	150021	ARS706.6.0	141600	lagging	775.237	231.307	361.158	320.232
YGL187C	7	150676	38.633	149576	150676	ARS706.6.0	141600	lagging	199.716	121.852	116.459	117.07
YGL186C	7	153362	35.7431	150882	153362	ARS707.0.0	162800	leading		366.233	181.112	405.647
YGL185C	7	154842	38.0401	152962	154842	ARS707.0.0	162800	leading		78.4224	451.077	111.285
YGL184C	7	156954	36.0444	154534	156954	ARS707.0.0	162800	leading		229.77	915.448	295.907
YGL181W	7	157366	35.6223	157366	159346	ARS707.0.0	162800	leading		125.751		67.0374
YGL183C	7	157790	35.0917	156410	157790	ARS707.0.0	162800	leading		135.239		201.782
YGL180W	7	159022	36.3279	159022	163142	ARS707.0.0	162800	leading		157.32		288.981
YGL179C	7	165578	39.8572	163238	165578	ARS707.0.0	162800	lagging	35.3958	146.823	602.515	76.4514
YGL178W	7	166857	42.7643	166857	170697	ARS707.0.0	162800	lagging	155.366	361.625	348.511	254.787
YGL177W	7	167064	42.7643	167064	168044	ARS707.0.0	162800	lagging	ND	427.684	ND	ND
YGL174W	7	174022	41.8487	174022	175602	ARS707.0.0	162800	lagging	516.501	1033.61	346.457	2412.17
YGL169W	7	185564	44.161	185564	187484	ARS709.0.1	194000	leading		234.229		149.458
YGL170C	7	185899	43.8009	184019	185899	ARS709.0.1	194000	leading		1808.93		313.686
YGL168W	7	186969	42.9922	186969	187929	ARS709.0.1	194000	leading		ND		370.263
YGL166W	7	190622	41.8364	190622	192062	ARS709.0.1	194000	leading		180.384		46.5757
YGL167C	7	191394	40.4828	187334	191394	ARS709.0.1	194000	leading		196.249		ND
YGL164C	7	193805	36.7411	191845	193805	ARS709.0.1	194000	leading		212.888		128.092
YGL163C	7	197066	35.6632	193466	197066	ARS709.0.1	194000	lagging	805.102	540.093		236.437
YGL162W	7	197518	36.1879	197518	199238	ARS710.0.0	198000	lagging	894.768	205.848	488.563	77.9673
YGL160W	7	199942	39.5486	199942	202502	ARS710.0.0	198000	lagging	488.992	487.266	1291.9	2675.68
YGL161C	7	200754	40.6189	198954	200754	ARS710.0.0	198000	lagging	496.802	443.995	905.499	110.02
YGL159W	7	202206	42.5332	202206	204166	ARS710.1.0	204400	leading		175.652	610.685	475.438
YGL158W	7	206150	41.2651	206150	208790	ARS710.1.0	204400	lagging	539.957	128.659	1783.11	288.593
YGL157W	7	208414	39.109	208414	210254	ARS710.1.0	204400	lagging	754.052	141.726	169.959	223.971
YGL156W	7	209838	39.1323	209838	213938	ARS710.1.0	204400	lagging	633.02	667.327	133.199	247.018
YGL155W	7	213446	41.2997	213446	215726	ARS711.0.1	220000	leading		81.5288		126.689
YGL129C	7	269650	40.4682	267450	269650	ARS714.1.0	276800	leading		400.021	204.748	260.632
YGL128C	7	270649	40.992	269169	270649	ARS714.1.0	276800	leading		197.022	188.873	247.873
YGL126W	7	270438	40.992	270438	272418	ARS714.1.0	276800	leading		261.684		175.783
YGL127C	7	271322	41.6277	270142	271322	ARS714.1.0	276800	leading		227.326		188.337
YGL125W	7	271886	41.3533	271886	274806	ARS714.1.0	276800	leading		443.955		274.826
YGL123W	7	276990	39.081	276990	278610	ARS714.1.0	276800	lagging	683.06	182.023	46.8601	343.976
YGL124C	7	277250	37.5581	274650	277250	ARS714.1.0	276800	leading		753.014	139.296	524.581
YGL123C-A	7	278369	35.7125	277509	278369	ARS714.1.0	276800	lagging	402.604	141.193	38.5789	358.048
YGL119W	7	283902	40.1774	283902	286102	ARS714.3.0	284400	lagging	107.055	125.482	570.115	601.677
YGL120C	7	284506	40.286	281386	284506	ARS714.2.1	282800	lagging	710.623	577.94	1459.63	955.135
YGL117W	7	287942	35.8835	287942	289542	ARS714.3.1	287600	lagging	63.4972	144.8	941.677	85.771
YGL118C	7	288956	37.0019	287896	288956	ARS714.3.1	287600	lagging	66.5808	153.26	918.266	93.2476
YGL116W	7	289166	37.0019	289166	291846	ARS714.3.1	287600	lagging	159.532	543.53		324.501
YGL114W	7	292718	36.9398	292718	295798	ARS714.3.1	287600	lagging	331.592	164.585	162.437	214.945
YGL113W	7	295382	40.5023	295382	298302	ARS714.3.1	287600	lagging	834.661	492.835	150.015	405.552
YGL086W	7	346670	44.6035	346670	349570	ARS716.2.0	348400	leading		243.968	212.465	134.702
YGL087C	7	347466	41.8461	346226	347466	ARS716.1.0	346800	lagging	122.392	729.414		419.711
YGL085W	7	349070	41.4025	349070	350710	ARS716.3.0	349600	lagging	108.044	195.981		269.069
YGL083W	7	352486	41.5581	352486	355686	ARS716.5.0	352800	lagging	46.4592	193.906	187.885	343.379
YGL084C	7	352858	42.2502	350378	352858	ARS716.3.0	349600	lagging	119.61	260.055	41.2831	90.8231
YGL070C	7	375362	40.3361	374002	375362	ARS716.9.1	370400	lagging	981.966	879.573	146.57	407.984
YGL067W	7	375510	40.3361	375510	377430	ARS717.0.0	378800	leading		255.43		219.484
YGL069C	7	376016	40.6539	374916	376016	ARS717.0.0	378800	leading		410.461	879.092	363.31
YGL066W	7	376926	41.9825	376926	379966	ARS717.0.0	378800	leading		175.761		122.691
YGL065C	7	381826	37.0958	379586	381826	ARS717.0.1	380800	leading		126.912		132.825
YGL063W	7	382910	38.9974	382910	385290	ARS717.1.0	384000	lagging	383.179	484.499	22.8689	51.6119
YGL064C	7	383714	39.1241	381334	383714	ARS717.0.2	382400	lagging	103.447	91.6496	62.5391	90.9793
YGL062W	7	384654	37.8013	384654	388934	ARS717.1.0	384000	lagging	274.867	404.036	566.484	211.239
YGL063C-A	7	385153	37.3559	384373	385153	ARS717.1.0	384000	lagging	226.745	393.96	469.443	147.906
YGL060W	7	389446	39.3804	389446	392226	ARS717.3.0	389200	lagging	311.826	226.799	91.6253	245.879
YGL061C	7	390298	40.2106	388758	390298	ARS717.3.0	389200	lagging	ND	76.7674	38.5923	266.095
YGL059W	7	391622	40.0755	391622	393862	ARS717.3.0	389200	lagging	ND	ND	321.939	ND
YGL058W	7	393422	40.1973	393422	394962	ARS717.3.0	389200	lagging	ND	245.997	183.867	284.931
YGL057C	7	396338	38.796	394798	396338	ARS717.3.1	398800	leading		275.596		594.993
YGL050W	7	405246	37.3251	405246	406846	ARS717.3.1	398800	lagging	316.295	90.2305	60.1162	395.542
YGL041W-A	7	418546	35.4048	418546	419426	ARS718.4.0	425200	leading		148.267		254.198
YGL042C	7	419096	36.8769	418156	419096	ARS718.4.0	425200	leading		357.469		380.058
YGL041C	7	419730	39.5743	418790	419730	ARS718.4.0	425200	leading		150.053		262.186
YGL040C	7	421162	39.4686	419202	421162	ARS718.4.0	425200	leading		694.361		1257.94
YGL039W	7	423374	35.17	423374	425254	ARS718.4.0	425200	leading		358.991	559.47	541.887
YGL038C	7	427402	39.0327	424942	427402	ARS718.4.0	425200	lagging	51.2835	43.7768	220.921	570.218
YGL036W	7	428030	37.6525	428030	431470	ARS718.4.0	425200	lagging	406.721	221.434	1011.23	322.33
YGL037C	7	428562	37.0269	427062	428562	ARS718.4.0	425200	lagging	ND	ND	ND	1000.13
YGL014W	7	465238	42.5908	465238	468978	ARS719.0.0	477600	leading		328.788		236.23
YGL015C	7	465939	42.5108	464919	465939	ARS719.0.0	477600	leading		5749.85		489.213
YGL014C-A	7	466902	41.4434	466102	466902	ARS719.0.0	477600	leading		99.5651		455.156
YGL010W	7	474982	37.3981	474982	476342	ARS719.0.0	477600	leading		430.519		ND
YGL011C	7	475786	39.2359	474226	475786	ARS719.0.0	477600	leading		1328.93		402.432
YGL004C	7	492482	36.6071	490582	492482	ARS719.8.1	492000	leading		940.532	616.362	236.215
YGL002W	7	493942	42.7787	493942	495482	ARS719.8.1	492000	lagging	485.166	ND	96.2963	80.7373
YGL003C	7	494778	43.3609	492118	494778	ARS719.8.1	492000	lagging	468.328	1132.19	94.2438	207.551
YGL001C	7	497098	39.4908	495118	497098	ARS719.8.1	492000	lagging	200.885	366.018	99.2569	271.377
YGR001C	7	498537	36.5639	496997	498537	ARS720.0.1	502800	leading		434.235		140.307
YGR003W	7	499622	35.7852	499622	502742	ARS720.0.1	502800	leading		921.964		209.115
YGR014W	7	516182	36.8959	516182	521102	ARS720.6.0	515600	lagging	224.005	155.527	20.213	181.265
YGR016W	7	521750	41.6768	521750	523750	ARS720.6.0	515600	lagging	320.572	235.4	150.389	165.103
YGR015C	7	522602	42.0862	520722	522602	ARS720.6.0	515600	lagging	675.302	806.145	271.797	413.326
YGR017W	7	523126	43.4497	523126	524886	ARS720.6.0	515600	lagging	74.4038	205.815	119.796	209.722
YGR034W	7	555238	41.8223	555238	556938	ARS721.0.1	556400	leading		271.194	194.164	87.2821
YGR033C	7	555594	41.8223	553934	555594	ARS721.0.1	556400	leading		1046.3		283.997
YGR035W-A	7	557068	39.6329	557068	557928	ARS721.0.1	556400	lagging	207.86	175.425		181.242
YGR041W	7	576646	35.3389	576646	579326	ARS722.0.0	576000	lagging	1698.46	391.004	1004.47	327.175
YGR042W	7	578950	38.1066	578950	580510	ARS722.2.0	578800	lagging	1753.17	432.281	847.232	630.832
YGR043C	7	581930	40.0263	580130	581930	ARS722.3.0	580400	lagging	777.749	702.172	35.3591	766.696
YGR046W	7	584278	40.7058	584278	586518	ARS722.3.0	580400	lagging	998.872	384.504	163.475	323.055
YGR044C	7	584395	40.7058	582855	584395	ARS722.3.0	580400	lagging	1063.12	57.9339		298.916
YGR045C	7	584799	40.7657	583799	584799	ARS722.3.0	580400	lagging	277.219	214.087	483.277	98.7904
YGR048W	7	589262	43.4561	589262	591102	ARS724.5.0.1	592800	leading		353.962		237.751
YGR047C	7	590010	43.2423	586190	590010	ARS724.5.0.1	592800	leading		181.084	197.662	307.468
YGR049W	7	590678	44.0686	590678	592178	ARS724.5.0.1	592800	leading		657.493	ND	98.019
YGR083C	7	647402	40.9564	644702	647402	ARS726.0.0	645200	lagging	1031.15	139.385	237.574	129.288
YGR084C	7	648594	35.3078	646914	648594	ARS726.0.0	645200	lagging	221.813	123.176		90.8512
YGR087C	7	653322	39.6652	651282	653322	ARS726.1.0	654000	leading		241.469	385.349	540.751
YGR088W	7	654118	41.847	654118	656538	ARS726.1.0	654000	lagging	374.361	195.446	254.75	186.297
YGR089W	7	656198	43.1194	656198	659958	ARS726.2.0	657200	lagging	339.942	112.904		118.657
YGR090W	7	661582	43.1404	661582	666262	ARS727.0.1	662000	lagging	142.753	256.969	150.067	357.595
YGR091W	7	665782	41.7529	665782	668082	ARS727.0.1	662000	lagging	128.655	152.374	264.516	86.989
YGR106C	7	700354	43.0493	698774	700354	ARS728.0.0	703600	leading		114.879		165.032
YGR107W	7	702170	43.2172	702170	703250	ARS728.0.0	703600	leading		90.8659		137.341
YGR108W	7	702910	44.6387	702910	705310	ARS728.0.0	703600	lagging	558.599	186.961		496.891
YGR112W	7	716806	38.9617	716806	718866	ARS728.3.0	716800	lagging	278.974	261.452	418.54	176.491
YGR113W	7	718342	42.1088	718342	720362	ARS728.3.0	716800	lagging	143.926	118.9	26.4322	108.282
YGR116W	7	719846	41.3855	719846	725086	ARS728.5.0	721200	lagging	47.7782	246.09	159.719	230.658
YGR114C	7	721157	44.2142	720137	721157	ARS728.5.0	721200	leading		314.407		397.788
YGR139W	7	765230	41.9821	765230	766190	ARS729.0.1	765600	lagging	96.2409	208.757	ND	157.613
YGR138C	7	766386	41.3626	763566	766386	ARS729.0.1	765600	leading		94.5645	36.1033	131.425
YGR140W	7	766982	38.0176	766982	770482	ARS729.0.2	768400	lagging	326.165	238.538	114.995	486.619
YGR141W	7	770038	38.6142	770038	772178	ARS729.1.1	772400	leading		106.68	154.225	137.712
YGR142W	7	771830	35.4612	771830	773870	ARS729.1.1	772400	lagging	702.739	506.208		198.3
YGR143W	7	774246	35.1967	774246	777966	ARS729.2.0	773600	lagging	405.051	285.856	1124.64	308.82
YGR144W	7	779670	37.8233	779670	781530	ARS729.6.0	781200	leading		311.826	1156.57	261.774
YGR145W	7	781230	38.6397	781230	784110	ARS729.6.0	781200	lagging	383.306	196.86		346.126
YGR146C	7	785658	40.9582	783858	785658	ARS729.7.1	785200	leading		69.5251	253.738	259.302
YGR146C-A	7	785941	40.9582	785141	785941	ARS729.7.1	785200	lagging	437.039	364.423		458.361
YGR147C	7	787506	42.9377	785826	787506	ARS729.7.1	785200	lagging	827.092	366.241		183.558
YGR149W	7	788142	44.2847	788142	790642	ARS729.9.1	790400	leading		604.433	145.799	1010.91
YGR158C	7	806594	41.3304	804934	806594	ARS729.9.1	790400	lagging	271.754	148.461	240.877	177.399
YGR160W	7	806577	41.3304	806577	807817	ARS729.9.1	790400	lagging	1014.7	354.396	191.909	436.987
YGR162W	7	823502	38.8824	823502	827462	ARS731.2.0	829200	leading		128.159		261.696
YGR163W	7	827056	40.3505	827056	828716	ARS731.2.0	829200	leading		60.2614		131.121
YGR164W	7	828129	41.0028	828129	829089	ARS731.2.0	829200	leading		102.784		62.4403
YGR165W	7	828574	40.8637	828574	830414	ARS731.2.0	829200	lagging	254.349	283.691	476.158	192.485
YGR166W	7	829926	40.9981	829926	832366	ARS731.2.0	829200	lagging	161.176	158.782	515.963	318.367
YGR167W	7	831886	35.7112	831886	833486	ARS731.3.0	832000	lagging	265.169	85.0422	268.157	144.397
YGR168C	7	835050	36.0631	833210	835050	ARS731.4.1	835200	leading		422.412		411.492
YGR169C	7	836434	36.6224	834494	836434	ARS731.4.1	835200	lagging	215.358	380.863	ND	328.719
YGR170W	7	836590	36.6224	836590	840970	ARS731.5.1	836800	lagging	214.9	273.683	ND	516.927
YGR169C-A	7	837266	36.1953	835866	837266	ARS731.5.0	836000	lagging	79.5065	83.2626	521.701	202.284
YGR171C	7	843082	43.0021	840642	843082	ARS731.7.0	840800	lagging	296.712	209.129	105.055	224.409
YGR173W	7	843318	43.2943	843318	845258	ARS731.7.1	842000	lagging	620.119	452.03	188.107	287.873
YGR172C	7	844138	41.9719	842538	844138	ARS731.7.1	842000	lagging	836.405	378.031	287.573	270.61
YGR174W-A	7	846022	41.4045	846022	846882	ARS731.8.0	846400	lagging	1847.43	181.354		201.209
YGR187C	7	871994	43.4206	869914	871994	ARS731.5.0.0	887200	leading		549.551		565.886
YGR188C	7	875666	42.3602	871786	875666	ARS731.5.0.0	887200	leading		273.288		401.392
YGR189C	7	878922	39.6293	876442	878922	ARS731.5.0.0	887200	leading		368.271		559.474
YGR191W	7	879694	40.2233	879694	882714	ARS731.5.0.0	887200	leading		ND		32.0165
YGR196C	7	892754	38.5903	889514	892754	ARS731.5.1.0	889600	lagging	573.196	253.126	841.987	377.692
YGR198W	7	894134	37.0554	894134	897374	ARS731.5.1.3	893600	lagging	1139.95	440.33	352.986	434.583
YGR197C	7	894866	35.867	892346	894866	ARS731.5.1.3	893600	lagging	402.937	183.769	ND	ND
YGR199W	7	896974	37.3187	896974	900254	ARS732.0.0	900000	leading		1106.76		ND
YGR200C	7	902834	37.3748	899694	902834	ARS732.0.0	900000	lagging	ND	71.3489	ND	ND
YGR201C	7	903682	39.2639	902362	903682	ARS732.0.1	901200	lagging	259.404	65.3829	39.1922	141.422
YGR203W	7	904638	42.1213	904638	905958	ARS732.0.1	901200	lagging	963.076	735.431		255.188
YGR204C-A	7	909678	44.4388	908938	909678	ARS732.5.0	916000	leading		204.883		335.607
YGR206W	7	909918	44.4388	909918	910918	ARS732.5.0	916000	leading		180.839	118.84	218.334
YGR240C	7	974513	39.3594	970413	974513	ARS733.0.0	974400	leading		182.365		215.713
YGR240C-A	7	975281	38.1632	974441	975281	ARS733.0.1	975200	leading		398.245		125.108
YGR242W	7	975919	37.8811	975919	976859	ARS733.1.0	977200	leading		70.0129	71.9297	80.7197
YGR243W	7	976749	38.4067	976749	977949	ARS733.1.0	977200	lagging	ND	570.137	41.0021	ND
YGR241C	7	977601	41.2412	974721	977601	ARS733.0.1	975200	lagging	169.747	336.493	345.468	248.42
YGR250C	7	994233	44.4683	990953	994233	ARS734.1.0	994800	leading		411.221	390.684	172.977
YGR251W	7	995109	42.718	995109	996889	ARS734.1.1	996400	leading		247.304		153.913
YGR252W	7	996325	43.9016	996325	998485	ARS734.2.0	997600	leading		322.69	148.409	222.112
YGR253C	7	999705	41.7222	998165	999705	ARS734.2.0	997600	lagging	50.7899	434.13		172.04
YGR254W	7	1000389	40.06	1000389	1002529	ARS734.3.1	1001600	leading		177.063	272.897	447.846
YGR256W	7	1004129	42.6062	1004129	1006229	ARS735.1.0	1004000	lagging	336.851	716.57	376.299	209.078
YGR255C	7	1004561	44.2376	1002301	1004561	ARS735.0.0	1002400	lagging	226.463	322.998	692.835	1390.5
YHL049C	8	5039	42.3992	3599	5039	ARS131n.0.0	4	lagging	65.7351	127.371	ND	ND
YHL048W	8	5899	39.9613	5899	7679	ARS131n.0.0	4	lagging	86.2432	130.993	ND	ND
YHL048C-A	8	6295	38.2328	5535	6295	ARS131n.0.0	4	lagging	94.923	377.964	50.9295	55.9804
YHL030W-A	8	38571	41.7361	38571	39671	ARS804.1.0	40000	leading		240.952		655.265
YHL032C	8	39120	41.2657	36200	39120	ARS804.1.0	40000	leading		164.454		113.042
YHL030W	8	39564	40.665	39564	45904	ARS804.1.0	40000	lagging	609.567	ND	245.276	361.526
YHL031C	8	40048	39.0861	38628	40048	ARS804.1.0	40000	leading		240.535		741.032
YHL027W	8	50492	35.6113	50492	53332	ARS804.7.0	54800	leading		655.545	309.711	378.392
YHL018W	8	69204	39.6997	69204	70204	ARS805.3.1	76400	leading		337.516	55.7297	44.2276
YHL019C	8	70081	39.1252	67521	70081	ARS805.1.0	62000	lagging	182.033	155.478	127.512	238.893
YHL017W	8	69772	39.502	69772	71992	ARS805.3.1	76400	leading		175.548	35.5267	310.591
YHL015W-A	8	74195	44.8601	74195	74915	ARS805.3.1	76400	leading		64.4279	89.9935	95.2918
YHL014C	8	77817	44.7669	75977	77817	ARS805.3.1	76400	lagging	340.658	ND	112.683	190.045
YHL006W-A	8	97227	41.0258	97227	98207	ARS805.5.1.0	102000	leading		288.267	111.033	208.449
YHL004W	8	98637	41.5633	98637	100657	ARS805.5.1.0	102000	leading		206.889		191.331
YHL006C	8	99290	40.3009	98210	99290	ARS805.5.1.0	102000	leading		463.838		164.888
YHL005C	8	99715	39.5838	98695	99715	ARS805.5.1.0	102000	leading		227.92		183.555
YHL002W	8	101637	44.597	101637	104137	ARS805.5.1.0	102000	lagging	100.915	1224.44	259.09	220.505
YHL003C	8	102545	43.4173	100265	102545	ARS805.5.1.0	102000	leading		1536.42		204.34
YHL002C-A	8	103569	38.3214	102449	103569	ARS805.5.1.0	102000	lagging	263.205	447.738	348.929	478.71
YHL001W	8	103717	36.4728	103717	105357	ARS805.5.1.0	102000	lagging	385.848	191.229	229.281	144.688
YHR004C	8	113777	39.4501	111377	113777	ARS805.5.2.1	111200	lagging	69.2738	243.613	74.5573	186.29
YHR007C	8	122345	36.0944	119685	122345	ARS805.7.0.1	117600	lagging	187.103	301.079	82.831	278.203
YHR007C-A	8	123259	35.9476	122419	123259	ARS807.0.1	127600	leading		394.008	61.7637	203.201
YHR008C	8	124084	36.6589	122744	124084	ARS807.0.1	127600	leading		244.982	114.717	619.432
YHR012W	8	128949	37.7352	128949	130889	ARS807.0.2	129200	lagging	169.506	263.1	1405.7	129.58
YHR014W	8	131539	41.2574	131539	133039	ARS807.0.2	129200	lagging	583.533	224.536	292.533	1375.58
YHR013C	8	131993	40.32	130453	131993	ARS807.0.2	129200	lagging	174.797	225.356	538.594	330.25
YHR018C	8	141953	39.5083	139653	141953	ARS808.0.0	136800	lagging	ND	248.824	176.691	79.9198
YHR025W	8	158901	39.7197	158901	160701	ARS809.1.0	163600	leading		315.143		212.525
YHR024C	8	159721	37.1954	157341	159721	ARS809.1.0	163600	leading		483.151	444.494	180.763
YHR026W	8	160197	36.5337	160197	161817	ARS809.1.0	163600	leading		126.556		212.844
YHR028W-A	8	166844	35.4024	166844	167804	ARS809.3.0	167200	lagging	ND	174.628	215.899	176.583
YHR028C	8	167977	36.4322	164757	167977	ARS809.2.0	165200	lagging	276.022	296.634	166.559	304.612
YHR029C	8	169097	36.1512	167417	169097	ARS809.3.0	167200	lagging	309.212	432.605		215.772
YHR030C	8	171033	35.0969	168593	171033	ARS809.3.1	168800	lagging	149.322	236.184	48.2095	186.968
YHR032W	8	172836	38.1405	172836	175216	ARS809.4.0	169200	lagging	328.15	823.616	211.731	40.215
YHR031C	8	173513	39.4036	170533	173513	ARS809.4.0	169200	lagging	327.371	563.21	33.3203	155.724
YHR032W-A	8	174687	40.4006	174687	175487	ARS809.4.0	169200	lagging	670.987	712.057	ND	303.446
YHR033W	8	174997	40.5115	174997	177217	ARS809.4.0	169200	lagging	614.457	419.566	227.86	389.604
YHR032C-A	8	175886	41.6963	175146	175886	ARS809.4.0	169200	lagging	860.282	1022.85	215.503	418.308
YHR035W	8	177685	43.4315	177685	180345	ARS809.4.0	169200	lagging	372.747	1598.94		492.36
YHR067W	8	230420	44.1756	230420	232220	ARS813.0.1	235200	leading		229.837	143.639	159.557
YHR068W	8	231580	43.2202	231580	233660	ARS813.0.1	235200	leading		497.71	226.035	219.603
YHR070W	8	234308	43.8635	234308	236748	ARS813.0.1	235200	lagging	204.708	254.831	64.0824	76.1916
YHR069C	8	235232	42.134	233312	235232	ARS813.0.1	235200	leading		253.351		397.946
YHR069C-A	8	235737	40.1253	234737	235737	ARS813.0.1	235200	lagging	98.6382	480.358	54.2775	157.456
YHR071W	8	236124	38.2728	236124	237824	ARS813.0.1	235200	lagging	105.976	179.367	131.955	187.361
YHR070C-A	8	237013	36.2288	235973	237013	ARS813.0.1	235200	lagging	134.538	164.18		180.004
YHR072W	8	238516	38.4646	238516	241476	ARS813.2.0	239200	lagging	240.794	78.5428	146.266	240.232
YHR076W	8	250564	42.7261	250564	252464	ARS813.8.1	250800	lagging	103.688	387.679	198.783	102.205
YHR075C	8	250200	41.9542	248320	250200	ARS813.7.0	249200	lagging	254.866	123.435		183.129
YHR085W	8	276236	41.2149	276236	278076	ARS815.1.0	298800	leading		329.342		231.858
YHR086W	8	277436	43.6294	277436	280176	ARS815.1.0	298800	leading		233.953		68.83
YHR086W-A	8	279732	44.0055	279732	280532	ARS815.1.0	298800	leading		506.072		224.119
YHR087W	8	280244	43.047	280244	281464	ARS815.1.0	298800	leading		294.127		322.887
YHR088W	8	280964	39.9346	280964	282664	ARS815.1.0	298800	leading		437.97		387.606
YHR090C	8	285160	35.242	283400	285160	ARS815.1.0	298800	leading		131.984		198.767
YHR100C	8	315224	42.6519	313884	315224	ARS815.3.1	302400	lagging	373.543	504.299		246.25
YHR102W	8	315900	44.0016	315900	320040	ARS816.0.0	328400	leading		309.841		201.446
YHR121W	8	352188	38.9049	352188	353548	ARS816.1.0	358000	leading		294.144		371.814
YHR122W	8	353060	37.3834	353060	354660	ARS816.1.0	358000	leading		302.877		210.28
YHR123W	8	354292	39.8444	354292	356372	ARS816.1.0	358000	leading		150.02		128.816
YHR124W	8	357188	36.5666	357188	358608	ARS816.1.0	358000	leading		138.754	167.946	164.861
YHR125W	8	358360	37.7392	358360	359300	ARS816.1.0	358000	lagging	242.913	471.123	406.158	209.143
YHR127W	8	360380	37.865	360380	361980	ARS816.3.0	361600	leading		280.357	183.259	174.291
YHR126C	8	360683	37.3335	359583	360683	ARS816.2.0	360400	leading		447.076		70.9791
YHR128W	8	361572	38.0858	361572	363132	ARS816.3.0	361600	lagging	186.559	215.479	32.6645	ND
YHR129C	8	364760	42.7473	362740	364760	ARS816.3.0	361600	lagging	201.945	431.85	74.3344	76.6427
YHR130C	8	365802	44.0437	364842	365802	ARS816.3.0	361600	lagging	273.718	308.342	213.069	252.235
YHR131W-A	8	367249	44.5408	367249	368129	ARS816.3.0	361600	lagging	404.437	ND		267.474
YHR134W	8	371269	44.1738	371269	372789	ARS816.3.0	361600	lagging	1558.77	337.146	163.134	80.8748
YHR133C	8	372281	43.5313	370381	372281	ARS816.3.0	361600	lagging	93.5344	444.556		124.627
YHR137C-A	8	376890	43.5916	375610	376890	ARS818.1.0	382400	leading		351.614	186.65	94.1808
YHR139C-A	8	380921	42.9526	379981	380921	ARS818.1.0	382400	leading		ND	340.394	618.588
YHR142W	8	382781	42.6513	382781	384701	ARS818.1.2	384400	leading		504.128	402.573	278.667
YHR141C	8	383305	42.7573	381765	383305	ARS818.1.0	382400	lagging	211.851	476.745	665.957	1141.17
YHR143W	8	384501	41.1533	384501	386801	ARS818.1.2	384400	lagging	211.774	237.095	335.931	158.747
YHR143W-A	8	386685	41.7259	386685	387825	ARS818.3.0	388800	leading		162.192	68.1836	45.5318
YHR146W	8	389773	37.8233	389773	391933	ARS818.3.1	390000	lagging	74.0162	82.157	ND	321.526
YHR144C	8	389257	39.1743	387517	389257	ARS818.3.0	388800	leading		141.43	64.8983	72.3286
YHR145C	8	389839	37.8233	388859	389839	ARS818.3.0	388800	lagging	220.971	133.013	60.064	504.239
YHR148W	8	393005	35.8	393005	394565	ARS818.4.1	393200	lagging	113.163	525.566	370.688	144.758
YHR147C	8	393841	37.2573	392421	393841	ARS818.4.1	393200	leading		67.877	45.5684	438.455
YHR150W	8	396701	41.4133	396701	399341	ARS818.6.1	395600	lagging	461.509	727.513	319.693	287.142
YHR149C	8	397305	40.3033	394205	397305	ARS818.6.1	395600	lagging	215.385	1649.62	145.462	120.197
YHR164C	8	429769	39.4128	424469	429769	ARS818.5.6.0	424400	lagging	143.303	620.182		335.007
YHR175W-A	8	453057	35.0986	453057	453837	ARS820.10.0	453200	lagging	ND	ND	1098.36	60.1915
YHR176W	8	453613	35.4455	453613	455733	ARS820.10.0	453200	lagging	487.16	312.68	41.869	ND
YHR177W	8	456063	35.7351	456063	458463	ARS820.10.0	453200	lagging	539.602	403.98	453.181	1713.75
YHR178W	8	458751	38.6197	458751	462011	ARS821.0.0	460800	leading		289.599		219.854
YHR179W	8	461903	37.2578	461903	463943	ARS821.0.0	460800	lagging	328.216	263.751	189.585	236.968
YHR181W	8	466679	42.0452	466679	468119	ARS821.0.1	464400	lagging	330.39	166.927	94.5941	ND
YHR180W-A	8	466431	42.0452	466431	467251	ARS821.0.1	464400	lagging	458.261	488.018	154.98	827.186
YHR180C-B	8	467561	40.3541	466821	467561	ARS821.0.1	464400	lagging	385.697	156.689	76.6892	ND
YHR182W	8	467647	40.7973	467647	470887	ARS821.0.1	464400	lagging	194.843	247.582		83.9536
YHR183W	8	470383	44.6417	470383	472663	ARS821.1.0	471200	lagging	335.455	358.916		100.737
YHR184W	8	473423	42.4112	473423	474743	ARS821.1.1	472800	lagging	169.391	95.6974	63.0433	227.919
YHR185C	8	475839	43.4545	474499	475839	ARS821.2.0	475600	leading		178.377		91.2061
YHR187W	8	480455	43.5469	480455	482135	ARS821.2.0	475600	lagging	84.5826	367.309		259.267
YHR186C	8	481251	44.5591	475871	481251	ARS821.2.0	475600	lagging	335.639	402.051	318.589	234.676
YHR194W	8	488103	44.3678	488103	490603	ARS822.0.0	497600	leading		249.972		189.108
YHR197W	8	493383	43.3564	493383	496403	ARS822.0.0	497600	leading		329.833	266.071	259.819
YHR198C	8	497779	38.0478	496019	497779	ARS822.0.0	497600	leading		769.84	159.44	106.215
YHR199C	8	498921	36.4959	497361	498921	ARS822.1.0	500800	leading		548.642		ND
YHR200W	8	498543	37.9064	498543	500083	ARS822.1.0	500800	leading		239.758		132.103
YHR204W	8	505631	43.4534	505631	508891	ARS822.3.0	504400	lagging	577.128	446.831	164.243	210.445
YHR203C	8	506147	43.9686	504227	506147	ARS822.3.0	504400	lagging	186.455	189.755	92.2044	182.537
YHR208W	8	516983	40.7494	516983	518963	ARS823.2.1	519600	leading		301.686	266.792	144.471
YHR207C	8	517067	40.7494	514667	517067	ARS823.1.0	513600	lagging	518.749	274.977		317.647
YHR209W	8	518495	39.6255	518495	520455	ARS823.2.1	519600	leading		232.431		78.9384
YIL169C	9	26605	43.3876	22985	26605	ARS907.0.0	1	lagging	300.264	305.93	76.2505	233.767
YIL166C	9	33464	42.9313	31204	33464	ARS907.0.0	1	lagging	476.607	511.305	338.259	377.434
YIL165C	9	34576	42.8136	33596	34576	ARS907.0.0	1	lagging	638.179	140.689	216.938	191.08
YIL164C	9	35185	43.8036	33965	35185	ARS907.0.0	1	lagging	468.924	111.877	325.419	151.803
YIL151C	9	61193	44.2893	57213	61193	ARS907.0.2	59600	leading		385.146	171.471	254.806
YIL148W	9	67932	37.9008	67932	69732	ARS907.2.0	74400	leading		37.8297		335.5
YIL149C	9	68704	35.2837	62784	68704	ARS907.0.2	59600	lagging	332.822	179.434	199.387	254.905
YIL147C	9	74176	36.2138	69396	74176	ARS907.2.0	74400	leading		152.424		591.845
YIL144W	9	77484	41.6945	77484	80384	ARS908.0.0	78400	lagging	455.369	67.6095	171.276	346.228
YIL145C	9	77848	40.7461	75908	77848	ARS907.3.1	76000	lagging	373.68	95.5908	75.2604	107.409
YIL142W	9	82764	35.1801	82764	85044	ARS908.1.0	81200	lagging	675.767	182.99	146.62	375.667
YIL143C	9	83576	36.8943	80036	83576	ARS908.0.2	80800	lagging	237.03	642.773	103.938	132.686
YIL142C-A	9	84039	40.7321	83079	84039	ARS908.1.0	81200	lagging	769.52	117.117	126.143	740.651
YIL141W	9	84552	42.9469	84552	85572	ARS908.1.0	81200	lagging	369.14	92.5545	220.152	371.158
YIL139C	9	89232	36.4447	87732	89232	ARS908.1.0	81200	lagging	469.246	254.303	166.166	171.743
YIL135C	9	96952	35.9732	94752	96952	ARS909.1.0	97200	leading		207.273		147.881
YIL134W	9	96860	35.9732	96860	98560	ARS909.1.0	97200	lagging	593.374	500.045		212.716
YIL134C-A	9	97224	35.4506	96384	97224	ARS909.1.0	97200	leading		392.147		209.099
YIL132C	9	101016	35.6496	99316	101016	ARS909.3.0	99600	lagging	428.529	61.7737	152.933	95.3148
YIL130W	9	102156	35.8068	102156	105876	ARS909.5.0	103200	lagging	156.833	47.3036	262.807	285.2
YIL131C	9	102840	35.2975	100520	102840	ARS909.4.0	101200	lagging	301.206	218.403	48.682	202.021
YIL128W	9	113228	40.3632	113228	117128	ARS909.11.0	113200	lagging	185.555	349.007	206.84	128.961
YIL129C	9	113840	39.4395	105880	113840	ARS909.7.0	106400	lagging	377.605	241.419	428.922	189.725
YIL126W	9	117308	44.5605	117308	122328	ARS909.11.0	113200	lagging	820.661	489.399		346.847
YIL127C	9	118176	44.1759	116816	118176	ARS909.11.0	113200	lagging	643.688	189.492	192.477	ND
YIL122W	9	129836	39.3537	129836	131876	ARS911.1.0	131200	leading		166.738		106.494
YIL121W	9	131692	41.5336	131692	134132	ARS911.3.0	134000	leading		419.062	298.118	132.334
YIL108W	9	160156	44.8089	160156	163156	ARS911.5.2.1	163600	leading		165.806		361.553
YIL109C	9	160776	44.9614	157096	160776	ARS911.5.2.1	163600	leading		1402.76	282.117	221.154
YIL106W	9	165812	40.2002	165812	167692	ARS911.5.4.0	166400	lagging	472.106	282.836	184.047	405.986
YIL107C	9	166456	37.1888	163036	166456	ARS911.5.2.1	163600	lagging	353.384	1128.11	141.348	346.503
YIL105W-A	9	167160	36.6597	167160	167940	ARS911.5.4.0	166400	lagging	1498.24	177.009		ND
YIL105C	9	170304	38.3477	167284	170304	ARS911.5.6.0	172400	leading		225.882	532.545	446.535
YIL103W	9	171148	38.3575	171148	173228	ARS911.5.6.0	172400	leading		88.9452	83.3421	453.821
YIL104C	9	172032	37.4233	169752	172032	ARS911.5.6.0	172400	leading		608.184	97.3816	700.167
YIL100W	9	176869	36.6813	176869	177849	ARS912.1.0	177200	lagging	334.159	1362.14		345.021
YIL099W	9	177500	38.1282	177500	179780	ARS912.1.0	177200	lagging	493.346	361.149	464.694	287.469
YIL101C	9	177746	39.798	175166	177746	ARS912.0.0	175200	lagging	365.971	287.513		209.74
YIL100C-A	9	178177	41.5641	177217	178177	ARS912.1.0	177200	lagging	420.44	669.453	298.124	69.9882
YIL098C	9	180776	44.8737	179576	180776	ARS912.2.0	179600	lagging	519.684	393.657	628.125	230.497
YIL095W	9	183196	44.8095	183196	186596	ARS912.2.0	179600	lagging	528.159	228.124	323.547	202.168
YIL089W	9	195068	44.8023	195068	196788	ARS913.2.0	211600	leading		157.176		261.702
YIL088C	9	199976	40.0938	197736	199976	ARS913.2.0	211600	leading		85.9992	215.276	205.128
YIL087C	9	200615	40.0944	199515	200615	ARS913.2.0	211600	leading		119.893	242.849	231.941
YIL086C	9	200957	40.84	200017	200957	ARS913.2.0	211600	leading		814.419	565.751	326.586
YIL078W	9	211948	36.3326	211948	214908	ARS913.2.0	211600	lagging	413.033	827.989	195.855	126.101
YIL075C	9	221256	37.8737	217616	221256	ARS913.7.0	218000	lagging	389.583	320.224	643.893	402.247
YIL074C	9	223120	40.2156	220840	223120	ARS913.8.0	220800	lagging	93.1341	302.47	127.235	136.859
YIL073C	9	225072	37.3626	222672	225072	ARS913.9.0	223600	lagging	183.66	484.182	172.152	201.425
YIL072W	9	226098	40.6666	226098	228538	ARS913.10.0	226800	lagging	197.776	766.191	178.607	240.768
YIL071C	9	230512	41.107	228432	230512	ARS913.10.0	226800	lagging	259.023	366.283	226.691	121.787
YIL070C	9	231648	40.9956	230008	231648	ARS913.10.0	226800	lagging	351.328	251.819	314.768	522.587
YIL068W-A	9	232509	38.0091	232509	233529	ARS913.10.0	226800	lagging	138.446	654.081	224.161	504.146
YIL069C	9	232960	36.4576	231200	232960	ARS913.10.0	226800	lagging	268.234	942.859	271.33	427.807
YIL063C	9	244280	36.7691	242560	244280	ARS913.5.0.0	243600	leading		109.006		41.8331
YIL056W	9	249196	35.5893	249196	252176	ARS914.0.0	248400	lagging	77.7417	256.566	170.722	278.786
YIL057C	9	249576	35.7334	248256	249576	ARS914.0.0	248400	lagging	12239	73.599	252.142	172.189
YIL055C	9	254920	44.2446	251800	254920	ARS914.1.0	252400	lagging	174.708	239.664	ND	85.8802
YIL029W-A	9	299233	40.3223	299233	300233	ARS916.0.1	310800	leading		852.339		471.216
YIL030C	9	300568	42.2444	295768	300568	ARS916.0.1	310800	leading		325.75		357.308
YIL028W	9	301597	44.1961	301597	302617	ARS916.0.1	310800	leading		182.749		346.908
YIL029C	9	301754	44.5093	300694	301754	ARS916.0.1	310800	leading		511.059		508.752
YIL027C	9	304656	38.8476	303376	304656	ARS916.0.1	310800	leading		472.018		190.145
YIL026C	9	308488	37.0979	304208	308488	ARS916.0.1	310800	leading		88.3619		96.2894
YIL025C	9	309072	36.7946	308072	309072	ARS916.0.1	310800	leading		331.16		164.489
YIL024C	9	309668	36.9796	308468	309668	ARS916.0.1	310800	leading		478.888		164.489
YIL022W	9	310556	38.6462	310556	312896	ARS916.0.1	310800	lagging	307.294	1162.2	115.55	149.958
YIL023C	9	311096	39.6611	309076	311096	ARS916.0.1	310800	leading		713.389		ND
YIL021W	9	312316	41.7101	312316	314176	ARS916.0.1	310800	lagging	186.403	205.366	311.396	136.425
YIL018W	9	316204	42.9582	316204	318284	ARS916.0.1	310800	lagging	ND	ND	380.279	215.047
YIL015W	9	322820	44.1594	322820	324340	ARS919.1.0	335600	leading		60.417	72.4837	103.875
YIL014W	9	325436	37.2334	325436	328176	ARS919.1.0	335600	leading		93.4816		262.017
YIL012W	9	332508	37.3221	332508	333528	ARS919.1.0	335600	leading		115.148		291.807
YIL011W	9	333156	37.7067	333156	334976	ARS919.1.0	335600	leading		89.9679		234.767
YIL010W	9	334348	36.1362	334348	335828	ARS919.1.0	335600	leading		210.118		415.332
YIL009W	9	338836	35.9864	338836	341816	ARS919.3.0	340400	leading		165.438	258.679	296.494
YIL007C	9	344416	35.4194	342696	344416	ARS919.4.0	343200	lagging	262.539	165.996	170.254	ND
YIL005W	9	345044	35.2008	345044	348124	ARS919.4.0	343200	lagging	1024.89	93.0105	161.09	227.075
YIL001W	9	353316	36.9408	353316	355676	ARS920.1.1	355600	leading		174.954		112.988
YIR002C	9	361200	35.9947	357180	361200	ARS920.2.0	357200	lagging	184.962	514.989	182.986	100.763
YIR004W	9	362628	37.3635	362628	364748	ARS920.6.1	365200	leading		146.883	150.749	170.742
YIR005W	9	364348	38.4193	364348	365628	ARS920.6.1	365200	leading		113.236	ND	146.802
YIR007W	9	370188	40.9228	370188	373228	ARS920.6.1	365200	lagging	653.596	441.576	533.326	457.213
YIR006C	9	370576	41.7154	365256	370576	ARS920.6.1	365200	lagging	480.432	284.274	397.844	163.386
YIR019C	9	393424	37.316	389224	393424	ARS922.0.0	403600	leading		118.242		80.1666
YIR032C	9	416264	35.0064	414764	416264	ARS922.5.1	415200	lagging	344.597	322.48	316.776	289.074
YIR036C	9	423456	36.0849	421736	423456	ARS922.9.0	422400	lagging	86.7217	1781.81	813.199	198.576
YIR038C	9	425048	41.3328	423488	425048	ARS922.10.0	423200	lagging	1022.92	1121.93	303.295	602.327
YJL203W	10	52796	43.8516	52796	54396	ARS1004.5.3	51200	lagging	560.874	356.857		199.342
YJL204C	10	53704	41.7614	50444	53704	ARS1004.5.3	51200	lagging	346.617	215.694	ND	ND
YJL201W	10	53836	41.7614	53836	56516	ARS1004.5.3	51200	lagging	514.488	278.042		403.264
YJL202C	10	54789	41.3037	53809	54789	ARS1004.5.3	51200	lagging	666.551	247.389		283.925
YJL199C	10	60680	35.0149	59720	60680	ARS1005.0.0	62000	leading		278.76		18.7553
YJL197W	10	63228	35.555	63228	67828	ARS1005.0.0	62000	lagging	308.012	237.296	292.041	187.184
YJL194W	10	68804	38.588	68804	71324	ARS1005.3.0	70800	leading		340.073		1288.25
YJL196C	10	69456	37.8862	67496	69456	ARS1005.1.0	66000	lagging	333.457	192.28	363.093	339.299
YJL195C	10	70440	40.0343	69100	70440	ARS1005.3.0	70800	leading		114.491		1400.6
YJL193W	10	70860	41.9296	70860	72780	ARS1005.3.0	70800	lagging	104.063	460.882	245.734	370.215
YJL191W	10	73252	43.5937	73252	74872	ARS1005.3.1	71200	lagging	187.543	378.202	135.67	183.474
YJL192C	10	73952	43.6252	72452	73952	ARS1005.3.1	71200	lagging	581.945	94.1435	63.2384	356.491
YJL189W	10	75396	41.6797	75396	76736	ARS1005.3.2	76400	leading		489.869	230.118	143.448
YJL190C	10	75880	41.8794	74540	75880	ARS1005.3.2	76400	leading		352.642	210.809	148.627
YJL188C	10	77008	43.7968	76068	77008	ARS1005.3.2	76400	lagging	375.503	230.499	299.999	233.276
YJL186W	10	79612	44.3934	79612	82192	ARS1005.3.2	76400	lagging	265.888	563.615	205.249	622.385
YJL187C	10	79840	44.3934	76480	79840	ARS1005.3.2	76400	lagging	643.474	740.483	559.941	303.758
YJL184W	10	82740	42.2548	82740	83960	ARS1005.3.2	76400	lagging	198.268	369.253	146.237	1240.88
YJL185C	10	83488	40.3006	81748	83488	ARS1005.3.2	76400	lagging	759.018	280.285	379.991	269.103
YJL183W	10	83508	40.3006	83508	85568	ARS1005.3.2	76400	lagging	1245.66	425.915	187.404	237.75
YJL181W	10	85068	40.0972	85068	87748	ARS1006.0.0	96400	leading		281.213		243.697
YJL182C	10	86249	39.3399	85309	86249	ARS1005.3.2	76400	lagging	565.703	231.076		171.346
YJL179W	10	88204	40.6967	88204	89364	ARS1006.0.0	96400	leading		ND		121.219
YJL180C	10	89136	41.3002	87256	89136	ARS1006.0.0	96400	leading		351.54		85.2676
YJL177W	10	90132	35.9873	90132	91972	ARS1006.0.0	96400	leading		124.781		ND
YJL172W	10	97124	36.715	97124	99724	ARS1006.1.0	97600	lagging	313.019	433.253	608.911	184.967
YJL173C	10	97048	36.715	95848	97048	ARS1006.0.0	96400	lagging	84.2114	482.486	856.47	37.041
YJL171C	10	101432	35.7008	99472	101432	ARS1006.2.0	99600	lagging	151.729	351.202		103.923
YJL169W	10	101592	35.7008	101592	102592	ARS1006.3.0	100800	lagging	185.301	342.212	ND	83.1532
YJL170C	10	102272	36.5731	101012	102272	ARS1006.3.0	100800	lagging	114.005	116.823		270.544
YJL167W	10	104357	38.5438	104357	106237	ARS1006.4.1	104000	lagging	369.164	80.8527	678.446	115.71
YJL168C	10	105025	37.3101	101825	105025	ARS1006.3.0	100800	lagging	182.541	342.212	107.46	127.747
YJL166W	10	105829	35.9292	105829	106949	ARS1006.4.1	104000	lagging	236.073	272.086	165.553	78.9502
YJL164C	10	111881	39.5841	109581	111881	ARS1007.1.1	110400	lagging	208.959	429.46	93.9044	86.3562
YJL163C	10	113921	40.37	111421	113921	ARS1007.1.1	110400	lagging	407.521	100.803	221.193	197.452
YJL161W	10	116637	44.4113	116637	118077	ARS1007.5.0	117200	lagging	1269.68	773.581	358.937	212.741
YJL162C	10	116161	42.7471	113481	116161	ARS1007.3.0	114000	lagging	253.466	119.521	159.052	82.8661
YJL127C	10	184847	44.1637	181647	184847	ARS1008.0.0	177200	lagging	507.637	340.821		330.471
YJL125C	10	187231	37.7047	185291	187231	ARS1008.0.1	190000	leading		306.236	381.938	347.427
YJL124C	10	188311	35.8437	186711	188311	ARS1008.0.1	190000	leading		318.386	235.102	90.9579
YJL122W	10	189179	35.0927	189179	190499	ARS1008.0.1	190000	leading		659.635	151.37	220.788
YJL110C	10	212175	38.4304	209675	212175	ARS1008.7.1	210000	lagging	724.596	143.087	410.593	94.9586
YJL109C	10	217831	35.4244	211771	217831	ARS1008.8.0	212800	lagging	319.416	157.47	186.414	73.8571
YJL108C	10	219350	38.5033	217570	219350	ARS1009.1.0	223200	leading		231.835		111.851
YJL106W	10	219987	38.2164	219987	223587	ARS1009.1.0	223200	leading		387.926	261.966	82.9105
YJL107C	10	220510	35.7301	218710	220510	ARS1009.1.0	223200	leading		611.358		332.089
YJL105W	10	223107	37.4275	223107	226827	ARS1009.1.0	223200	lagging	414.293	188.661	294.178	194.613
YJL102W	10	230635	38.2262	230635	233975	ARS1009.5.0	233600	leading		263.253	305.467	318.705
YJL103C	10	231567	37.185	228687	231567	ARS1009.3.0	228400	lagging	101.644	109.043	124.811	657.499
YJL100W	10	236315	43.038	236315	239315	ARS1009.7.0	238000	leading		223.828		418.371
YJL101C	10	236999	43.7945	233899	236999	ARS1009.5.0	233600	lagging	139.379	665.27	123.599	204.128
YJL077W-A	10	294292	44.9222	294292	295012	ARS1010.2.0	295600	leading		598.564		213.672
YJL078C	10	294567	44.4418	290787	294567	ARS1010.2.0	295600	leading		856.738		178.681
YJL076W	10	294635	44.4418	294635	299275	ARS1010.2.0	295600	lagging	850.274	868.507	186.549	87.9144
YJL077C	10	295554	43.6696	294534	295554	ARS1010.2.0	295600	leading		1280.19	141.839	131.34
YJL075C	10	299369	43.3486	298329	299369	ARS1010.4.0	299200	leading		410.796	30.2842	103.968
YJL058C	10	328423	44.7577	325803	328423	ARS1011.1.0	337200	leading		190.867	515.023	737.855
YJL057C	10	330703	40.6941	327903	330703	ARS1011.1.0	337200	leading		357.249		289.605
YJL055W	10	332827	42.1317	332827	334347	ARS1011.1.0	337200	leading		807.124		309.914
YJL056C	10	333647	41.5802	330167	333647	ARS1011.1.0	337200	leading		563.029	198.975	161.877
YJL054W	10	333763	41.5802	333763	335923	ARS1011.1.0	337200	leading		230.878		205.695
YJL053W	10	335299	44.7347	335299	337339	ARS1011.1.0	337200	leading		100.338		365.667
YJL052W	10	337691	43.9828	337691	339531	ARS1011.1.0	337200	lagging	345.783	ND	78.9473	114.859
YJL045W	10	355243	41.9203	355243	358243	ARS1012.0.1	355200	lagging	640.057	113.582	127.354	171.413
YJL041W	10	365211	35.8408	365211	368611	ARS1012.1.1	364800	lagging	294.298	566.248	142.298	202.463
YJL034W	10	380787	37.1639	380787	383707	ARS1012.5.0	376000	lagging	361.91	235.666	174.899	87.8739
YJL035C	10	381551	37.2533	379991	381551	ARS1012.5.0	376000	lagging	338.895	346.616		60.7788
YJL033W	10	383299	38.9574	383299	386379	ARS1012.5.0	376000	lagging	189.885	156.794	507.468	210.609
YJL032W	10	385841	39.3466	385841	386781	ARS1014.0.1	394000	leading		714.605	429.221	358.728
YJL030W	10	387067	43.3354	387067	388547	ARS1014.0.1	394000	leading		ND	208.521	295.143
YJL031C	10	388031	44.021	386111	388031	ARS1014.0.1	394000	leading		712.034	212.395	197.036
YJL024C	10	397127	40.8993	395447	397127	ARS1014.0.1	394000	lagging	453.163	252.279	298.175	203.339
YJL022W	10	397602	41.1932	397602	398542	ARS1014.0.2	398400	leading		168.129		ND
YJL023C	10	398983	41.7627	397063	398983	ARS1014.0.2	398400	leading		296.513		246.362
YJL020W-A	10	400474	35.235	400474	401354	ARS1014.0.4	401600	leading		ND		184.572
YJL013C	10	411519	37.0266	409259	411519	ARS1014.5.0	408800	lagging	747.545	301.906	672.999	1645.41
YJL012C	10	413935	35.5747	411035	413935	ARS1014.7.0	413200	leading		273.816		847.668
YJL010C	10	420103	36.0242	417323	420103	ARS1014.9.0	417200	lagging	232.724	185.6	177.149	232.318
YJL004C	10	432711	36.0952	431191	432711	ARS1015.0.0	431200	lagging	478.651	149.347		292.168
YJR002W	10	438339	38.9384	438339	441139	ARS1015.1.1	436800	lagging	441.224	269.837		175.662
YJR005C-A	10	449223	37.4773	448343	449223	ARS1016.1.0	451600	leading		1490.15		120.683
YJR007W	10	450403	43.6321	450403	452263	ARS1016.1.0	451600	leading		84.7706	577.774	ND
YJR008W	10	451715	38.0297	451715	453795	ARS1016.1.0	451600	lagging	115.965	242.542	255.711	76.8677
YJR010W	10	455523	39.0863	455523	457963	ARS1016.3.0	455600	lagging	555.167	134.649	156.784	844.883
YJR009C	10	455255	39.0863	453415	455255	ARS1016.2.0	453600	lagging	177.549	194.049	191.321	117.347
YJR010C-A	10	458911	39.7797	457711	458911	ARS1016.3.0	455600	lagging	416.797	577.947	119.888	170.54
YJR013W	10	459811	39.2621	459811	461811	ARS1017.0.0	461200	leading		4501.18		107.242
YJR011C	10	459967	39.2621	458447	459967	ARS1017.0.0	461200	leading		ND		142.935
YJR012C	10	460703	39.655	459543	460703	ARS1017.0.0	461200	leading		ND		202.529
YJR014W	10	461275	41.7509	461275	462675	ARS1017.0.0	461200	lagging	317.611	147.218	401.155	243.011
YJR015W	10	462187	43.6675	462187	464527	ARS1017.0.0	461200	lagging	357.577	375.793		407.141
YJR018W	10	466277	43.099	466277	467277	ARS1017.0.2	464800	lagging	805.857	1052.95	257.646	403.745
YJR016C	10	466719	43.8467	464139	466719	ARS1017.0.2	464800	lagging	649.914	930.019	191.791	39.9022
YJR043C	10	518151	39.8123	516171	518151	ARS1017.5.3.0	517200	leading		339.404	285.813	440.515
YJR044C	10	519743	41.7283	518343	519743	ARS1017.5.3.1	519600	leading		477.415	125.341	488.658
YJR045C	10	522375	43.9266	519275	522375	ARS1017.5.3.1	519600	lagging	3040.16	394.122	997.85	190.482
YJR050W	10	528155	36.6325	528155	529775	ARS1018.0.1	530000	leading		307.852	233.948	131.508
YJR049C	10	528999	37.0512	526519	528999	ARS1018.0.1	530000	leading		122.969	683.59	ND
YJR051W	10	529299	36.7647	529299	531559	ARS1018.0.1	530000	lagging	ND	92.2514	367.763	35.2398
YJR052W	10	531427	35.4013	531427	533907	ARS1018.0.1	530000	lagging	286.481	423.785	233.782	199.59
YJR053W	10	533467	36.3413	533467	536147	ARS1018.1.0	534400	lagging	341.433	260.132		347.324
YJR054W	10	535507	37.7979	535507	537827	ARS1018.1.1	536400	lagging	195.678	417.676		390.214
YJR055W	10	538259	36.0803	538259	539799	ARS1018.1.1	536400	lagging	439.724	159.541		139.565
YJR061W	10	549907	37.8121	549907	553567	ARS1018.6.0	549600	lagging	349.649	402.821	472.356	238.819
YJR063W	10	554539	41.4203	554539	555859	ARS1018.6.0	549600	lagging	ND	ND	217.346	305.27
YJR062C	10	555359	39.5546	551819	555359	ARS1018.6.0	549600	lagging	185	176.566	269.391	321.499
YJR064W	10	555347	39.5546	555347	557827	ARS1018.6.0	549600	lagging	326.68	120.985	240.835	126.593
YJR066W	10	558875	42.5714	558875	567035	ARS1018.6.0	549600	lagging	1639.56	893.284	1094.79	413.071
YJR065C	10	559687	42.9818	557467	559687	ARS1018.6.0	549600	lagging	ND	330.248	483.115	331.738
YJR090C	10	595119	39.4209	590479	595119	ARS1018.5.0.0	608400	leading		167.441		449.774
YJR092W	10	598123	37.5269	598123	603483	ARS1018.5.0.0	608400	leading		359.964		307.869
YJR091C	10	598879	36.5194	594619	598879	ARS1018.5.0.0	608400	leading		358.319		209.535
YJR099W	10	614979	35.0131	614979	616559	ARS1019.0.0	613200	lagging	300.772	657.712	401.574	154.948
YJR098C	10	615735	35.5071	612895	615735	ARS1019.0.0	613200	lagging	312.158	ND	213.136	349.666
YJR104C	10	623551	35.9606	622331	623551	ARS1019.0.0	613200	lagging	316.479	191.234		82.7003
YJR106W	10	624325	36.9378	624325	627125	ARS1019.0.0	613200	lagging	385.237	601.271		75.7295
YJR107W	10	626828	43.2436	626828	628448	ARS1019.0.0	613200	lagging	ND	206.995		137.917
YJR108W	10	628339	43.0216	628339	629679	ARS1019.0.0	613200	lagging	398.656	296.068	564.399	394.591
YJR120W	10	646615	42.1323	646615	647595	ARS1020.0.0	647600	leading		422.743		111.077
YJR119C	10	647015	41.7608	644015	647015	ARS1020.0.0	647600	leading		321.291	180.574	292.993
YJR121W	10	647096	41.7608	647096	649256	ARS1020.0.0	647600	lagging	ND	287.015	182	98.3905
YJR122W	10	649211	38.9697	649211	651491	ARS1020.0.0	647600	lagging	736.565	425.837	457.13	294.645
YJR123W	10	651347	38.0293	651347	652867	ARS1020.2.0	654800	leading		239.276	401.034	493.329
YJR124C	10	654983	38.2536	652563	654983	ARS1020.2.0	654800	leading		503.11	410.1	268.114
YJR125C	10	656519	38.4539	654479	656519	ARS1020.2.0	654800	lagging	214.898	97.7232	299.435	343.856
YJR126C	10	659167	39.7386	656047	659167	ARS1020.2.0	654800	lagging	615.465	157.93		224.37
YJR128W	10	662410	41.2781	662410	663390	ARS1020.4.2	667200	leading		145.392		234.3
YJR127C	10	664223	39.155	658703	664223	ARS1020.2.0	654800	lagging	621.666	600.464		48.9786
YJR131W	10	666907	36.5219	666907	669587	ARS1020.4.2	667200	lagging	381.779	260.223	626.357	168.977
YJR130C	10	667695	35.4313	664955	667695	ARS1020.4.2	667200	leading		124.008	631.309	204.64
YJR140W-A	10	690450	35.2996	690450	691230	ARS1022.0.0	694800	leading		450.522	ND	ND
YJR141W	10	695355	35.961	695355	697195	ARS1022.0.0	694800	lagging	553.068	424.606	666.488	ND
YJR140C	10	696271	36.8246	690491	696271	ARS1022.0.0	694800	leading		593.493	649.379	819.015
YJR142W	10	696571	37.3354	696571	698591	ARS1022.0.0	694800	lagging	1550.91	205.24	226.497	194.166
YJR143C	10	701191	44.5791	697991	701191	ARS1022.1.0	700800	leading		609.685	1183.34	212.988
YJR149W	10	706379	43.3745	706379	708799	ARS1022.5.0	710800	leading		1288.52		812.353
YKL209C	11	45784	38.4251	42184	45784	ARS1102.5.0.0	4	lagging	508.957	650.746	123.651	265.461
YKL208W	11	46620	40.1685	46620	48300	ARS1102.5.0.0	4	lagging	2266.7	239.729	380.333	209.397
YKL202W	11	63321	44.4429	63321	64541	ARS1103.1.0	65200	leading		62.5054		161.419
YKL203C	11	64051	44.9064	55511	64051	ARS1102.5.0.1	51600	lagging	200.145	251.041	283.791	134.579
YKL187C	11	92075	44.9294	90995	92075	ARS1104.5.0.0	96400	leading		601.708	523.527	172.384
YKL184W	11	96063	40.4548	96063	98483	ARS1104.5.0.0	96400	lagging	207.489	142.886	110.101	59.2783
YKL161C	11	151403	41.247	148943	151403	ARS1105.5.2.0	148800	lagging	635.111	476.595	200.636	127.926
YKL160W	11	152703	42.5247	152703	153903	ARS1106.2.0	154400	leading		217.605	45.891	27.3055
YKL101W	11	247677	43.2045	247677	253257	ARS1106.7.8.2	237200	lagging	47.1198	1695.9	599.018	138.064
YKL103C	11	248113	43.0159	245413	248113	ARS1106.7.8.2	237200	lagging	85.5452	348.515	105.294	185.445
YKL102C	11	248510	43.2215	247570	248510	ARS1106.7.8.2	237200	lagging	85.5452	3252.8	181.161	223.883
YKL100W-A	11	253302	40.0313	253302	254022	ARS1107.1.0	260800	leading		ND		594.712
YKL100C	11	255633	39.9637	252973	255633	ARS1107.1.0	260800	leading		528.102		36.8138
YKL098W	11	255862	39.9637	255862	257822	ARS1107.1.0	260800	leading		138.031		65.6051
YKL099C	11	256698	42.2291	255138	256698	ARS1107.1.0	260800	leading		171.26		105.824
YKL096W-A	11	258310	41.2681	258310	259470	ARS1107.1.0	260800	leading		299.587	72.045	155.894
YKL096C-B	11	259365	41.9862	258585	259365	ARS1107.1.0	260800	leading		277.224	176.877	103.362
YKL097C	11	259056	41.7676	258016	259056	ARS1107.1.0	260800	leading		98.302		511.572
YKL096W	11	260238	42.9794	260238	261718	ARS1107.1.0	260800	lagging	67.8516	45.2714	58.0134	203.94
YKL076C	11	293364	41.3844	292344	293364	ARS1107.5.1.0	293200	leading		40.7879	204.884	110.234
YKL075C	11	294451	43.7908	292471	294451	ARS1107.5.1.0	293200	lagging	169.012	52.4624	265.18	128.302
YKL072W	11	298542	44.3268	298542	302122	ARS1107.5.4.0	296400	lagging	190.919	278.642	222.04	254.279
YKL071W	11	303374	43.4583	303374	305794	ARS1107.5.8.0	304000	lagging	152.886	121.516	235.702	67.7001
YKL068W-A	11	308238	44.7705	308238	309518	ARS1107.5.9.2	309600	leading		556.846	274.482	245.964
YKL066W	11	314424	44.2163	314424	315504	ARS1107.5.11.2	312000	lagging	324.755	88.2844	183.948	151.117
YKL065W-A	11	315097	44.0364	315097	315957	ARS1107.5.11.2	312000	lagging	ND	200.788	147.28	138.172
YKL063C	11	321874	44.4803	320314	321874	ARS1109.0.0	325200	leading		ND		ND
YKL061W	11	324886	39.5699	324886	326166	ARS1109.0.0	325200	lagging	285.225	388.816	384.05	228.364
YKL060C	11	327674	44.6486	325774	327674	ARS1109.0.0	325200	lagging	289.711	144.471	2659.53	278.252
YKL028W	11	384871	43.8552	384871	387111	ARS1112.2.0	387200	leading		45.0706	148.407	117.419
YKL029C	11	384979	43.8552	382119	384979	ARS1112.0.3	381600	lagging	152.186	238.012	505.706	146.515
YKL027W	11	386599	43.7593	386599	388879	ARS1112.2.0	387200	lagging	79.202	378.343		120.152
YKL005C	11	435147	42.4891	432407	435147	ARS1113.5.1.0	442400	leading		378.467		172.308
YKL003C	11	437675	44.5863	436475	437675	ARS1113.5.1.0	442400	leading		845.368	138.529	279.764
YKL001C	11	439643	39.6219	438163	439643	ARS1113.5.1.0	442400	leading		247.458	141.815	77.2094
YKR002W	11	442135	39.634	442135	444775	ARS1113.5.1.0	442400	lagging	ND	ND	218.282	543.121
YKR001C	11	442931	41.9197	439891	442931	ARS1113.5.1.0	442400	leading		456.476		203.234
YKR003W	11	444359	42.9801	444359	446579	ARS1113.5.3.0	443600	lagging	33.1802	588.61	187.553	243.632
YKR007W	11	450559	41.3444	450559	451799	ARS1114.1.0	451200	leading		62.5615		584.088
YKR006C	11	451395	39.1005	449795	451395	ARS1114.1.0	451200	leading		32.6829	935.304	385.17
YKR008W	11	451319	39.1005	451319	454079	ARS1114.1.0	451200	lagging	687.763	612.561		520.305
YKR010C	11	461507	43.8949	458267	461507	ARS1114.5.2.1	459200	lagging	127.781	510.345	125.528	212.847
YKR032W	11	505658	42.6297	505658	506598	ARS1116.0.0	516000	leading		301.631		ND
YKR031C	11	506651	43.6298	500631	506651	ARS1116.0.0	516000	leading		258.566		513.653
YKR033C	11	507445	44.6252	506385	507445	ARS1116.0.0	516000	leading		253.896		82.7914
YKR035C	11	508702	42.0466	507422	508702	ARS1116.0.0	516000	leading		62.1232		103.253
YKR036C	11	510774	37.8453	508214	510774	ARS1116.0.0	516000	leading		320.528		55.4081
YKR041W	11	517335	42.7981	517335	519095	ARS1116.1.0	517200	lagging	813.939	1063.17	24.6278	362.648
YKR042W	11	518455	43.3856	518455	520615	ARS1116.1.0	517200	lagging	437.76	668.731	343.708	167.145
YKR040C	11	518707	43.3856	517567	518707	ARS1116.1.0	517200	lagging	ND	77.8795	25.0645	537.745
YKR044W	11	520975	44.6901	520975	523175	ARS1116.1.0	517200	lagging	115.428	252.148	224.881	164.753
YKR050W	11	526007	44.1547	526007	530287	ARS1116.1.0	517200	lagging	215.464	377.311	303.179	265.756
YLL064C	12	13944	44.8192	12944	13944	ARS1205.0.1	1	lagging	528.098	138.689	58.3011	ND
YLL057C	12	27160	44.7678	25400	27160	ARS1205.0.1	1	lagging	1240.32	303.198	96.9937	181.31
YLL040C	12	64264	41.8094	53964	64264	ARS1205.0.1	1	lagging	425.408	950.943	277.16	324.991
YLL037W	12	66060	42.1471	66060	67080	ARS1205.0.1	1	lagging	62.6911	330.407	79.5512	116.13
YLL038C	12	67064	41.8361	65184	67064	ARS1205.0.1	1	lagging	138.237	396.177	113.511	305.048
YLL035W	12	67940	39.9051	67940	70740	ARS1205.0.2	71600	leading		312.622		714.684
YLL036C	12	68792	37.901	66512	68792	ARS1205.0.1	1	lagging	176.014	667.736	683.37	507.695
YLL033W	12	72892	38.1426	72892	74852	ARS1205.1.0	75200	leading		330.301	60.7476	1692.55
YLL034C	12	73696	37.0037	70336	73696	ARS1205.0.2	71600	lagging	345.22	278.418	56.386	529.486
YLL032C	12	77376	40.3189	73816	77376	ARS1205.1.0	75200	lagging	558.22	579.74	250.047	947.706
YLL028W	12	84148	36.4708	84148	87148	ARS1206.1.0	87200	leading		156.585		362.691
YLL025W	12	92268	43.5499	92268	95408	ARS1206.1.0	87200	lagging	45.8636	153.006	131.529	77.7154
YLL024C	12	98080	36.6467	95320	98080	ARS1206.5.1.0	99600	leading		56.3242		281.206
YLL023C	12	99384	39.3732	97804	99384	ARS1206.5.1.0	99600	leading		234.984		142.591
YLL021W	12	100308	40.2265	100308	105528	ARS1206.5.1.0	99600	lagging	247.159	118.413	134.464	370.496
YLL022C	12	101064	41.3584	98804	101064	ARS1206.5.1.0	99600	lagging	732.712	ND	515.045	228.411
YLL006W-A	12	135843	40.2311	135843	136643	ARS1208.4.0	135200	lagging	320.035	176.518	453.873	508.307
YLL006W	12	136020	40.8367	136020	139900	ARS1208.6.0	137600	lagging	555.589	221.552	446.996	510.951
YLL007C	12	136880	42.0075	133980	136880	ARS1208.4.0	135200	lagging	166.982	ND	11564.2	56.5197
YLL003W	12	142644	39.5618	142644	146244	ARS1208.8.0	142000	lagging	535.031	484.958	260.595	334.426
YLL002W	12	145756	36.3166	145756	147776	ARS1208.10.0	146000	lagging	316.202	120.407		304.959
YLR001C	12	154520	37.2775	151120	154520	ARS1208.13.0	151200	lagging	175.284	350.091	532.495	370.866
YLR002C	12	156880	37.2014	154040	156880	ARS1208.14.0	157200	leading		184.765		127.357
YLR003C	12	158272	42.0114	156572	158272	ARS1208.14.0	157200	lagging	146.488	110.2	65.4012	145.435
YLR005W	12	159500	41.1671	159500	161780	ARS1209.0.1	159600	lagging	90.5929	134.074	398.196	109.217
YLR004C	12	160312	41.6451	157752	160312	ARS1208.14.0	157200	lagging	1200.79	400.314	374.777	168.144
YLR036C	12	222696	38.0725	221016	222696	ARS1210.1.0	225200	leading		55.5285		430.056
YLR037C	12	223559	38.0531	222559	223559	ARS1210.1.0	225200	leading		367.462		235.722
YLR045C	12	238280	36.0778	234660	238280	ARS1211.1.0	232000	lagging	285.861	658.196	245.842	606.423
YLR046C	12	239313	41.2396	237873	239313	ARS1211.1.0	232000	lagging	555.341	1001.07		149.319
YLR048W	12	241644	38.1341	241644	243744	ARS1211.5.0.3	247600	leading		292.382	332.428	253.739
YLR047C	12	241907	38.1341	239207	241907	ARS1211.1.0	232000	lagging	430.036	366.883		329.733
YLR049C	12	245864	38.9794	243584	245864	ARS1211.5.0.3	247600	leading		132.674	165.232	500.51
YLR050C	12	246656	39.673	245356	246656	ARS1211.5.0.3	247600	leading		1771.62	288.396	336.61
YLR052W	12	246612	39.673	246612	248132	ARS1211.5.0.3	247600	leading		289.951	503.822	256.827
YLR051C	12	247504	42.2897	246104	247504	ARS1211.5.0.3	247600	leading		203.61		237.412
YLR053C	12	248880	44.67	247960	248880	ARS1211.5.0.3	247600	lagging	ND	124.867	273.948	151.478
YLR073C	12	282232	43.2778	280832	282232	ARS1212.1.2	289600	leading		415.359		84.5545
YLR075W	12	282380	43.2778	282380	283860	ARS1212.1.2	289600	leading		ND		60.9718
YLR074C	12	283016	40.1782	281716	283016	ARS1212.1.2	289600	leading		485.218		275.952
YLR077W	12	283284	39.3073	283284	285904	ARS1212.1.2	289600	leading		245.161	283.694	82.7044
YLR076C	12	284107	39.7804	283047	284107	ARS1212.1.2	289600	leading		166.222		46.0275
YLR098C	12	340040	42.9398	337240	340040	ARS1212.5.0.2	344400	leading		523.922		213.599
YLR099W-A	12	340756	43.1277	340756	341796	ARS1212.5.0.2	344400	leading		938.685		219.998
YLR099C	12	341520	44.1407	339520	341520	ARS1212.5.0.2	344400	leading		544.159		123.356
YLR100W	12	341220	44.1407	341220	343060	ARS1212.5.0.2	344400	leading		413.264		417.666
YLR105C	12	348728	44.6955	346828	348728	ARS1212.5.1.0	348800	leading		4907.07		486.96
YLR107W	12	363596	38.9343	363596	365596	ARS1212.5.1.2	363200	lagging	523.618	691.489	71.4098	857.998
YLR106C	12	364376	35.7471	348696	364376	ARS1212.5.1.0	348800	lagging	640.904	263.154	312.771	366.034
YLR112W	12	370291	37.5365	370291	371331	ARS1213.0.0	371600	leading		156.259		147.078
YLR113W	12	370924	41.9103	370924	373184	ARS1213.0.0	371600	lagging	120.262	121.635		202.327
YLR110C	12	370656	40.1878	369416	370656	ARS1213.0.0	371600	leading		269.185		475.201
YLR115W	12	377460	35.5532	377460	380820	ARS1213.0.1	373600	lagging	134.544	211.914	181.64	166.933
YLR116W	12	380356	35.9206	380356	382576	ARS1213.0.1	373600	lagging	ND	3457.71	301.854	ND
YLR120W-A	12	388172	38.91	388172	388912	ARS1213.0.1	373600	lagging	717.467	ND	672.262	82.6978
YLR120C	12	388824	40.7257	385984	388824	ARS1213.0.1	373600	lagging	115.326	519.532	457.652	279.75
YLR121C	12	390792	43.3822	388432	390792	ARS1213.0.1	373600	lagging	381.655	951.218	204.195	116.96
YLR124W	12	391100	43.8214	391100	392080	ARS1213.0.1	373600	lagging	60.4778	336.306	491.258	838.552
YLR122C	12	391831	44.4077	390831	391831	ARS1213.0.1	373600	lagging	60.831	2807.4	463.179	ND
YLR123C	12	391907	44.4077	390947	391907	ARS1213.0.1	373600	lagging	60.4778	460.973	456.703	838.552
YLR125W	12	392984	44.1639	392984	394024	ARS1215.0.0	412400	leading		912.526	223.759	60.4387
YLR128W	12	398100	39.2524	398100	399740	ARS1215.0.0	412400	leading		ND		1353.3
YLR127C	12	398896	38.4387	395516	398896	ARS1215.0.0	412400	leading		266.836		250.421
YLR129W	12	399108	38.4387	399108	402748	ARS1215.0.0	412400	leading		184.933		254.223
YLR130C	12	404752	36.6683	402392	404752	ARS1215.0.0	412400	leading		152.989		399.545
YLR134W	12	409780	35.0776	409780	412640	ARS1215.0.0	412400	leading		169.601		216.055
YLR140W	12	422974	36.6454	422974	423934	ARS1215.1.0	422400	lagging	193.586	411.522	197.951	ND
YLR141W	12	423183	36.6454	423183	424903	ARS1215.1.0	422400	lagging	148.867	298.045	ND	ND
YLR142W	12	424684	40.4615	424684	426864	ARS1215.1.0	422400	lagging	329.53	129.512	137.379	52.0173
YLR139C	12	424888	41.3109	421248	424888	ARS1215.1.0	422400	lagging	ND	269.461	256.568	190.477
YLR143W	12	426804	44.8065	426804	429724	ARS1215.1.0	422400	lagging	792.267	131.179	281.224	182.905
YLR150W	12	439812	38.6402	439812	441692	ARS1216.1.0	443200	leading		ND		148.26
YLR149C	12	440400	37.7172	437280	440400	ARS1216.1.0	443200	leading		1536.13		94.6024
YLR149C-A	12	440956	37.4054	440236	440956	ARS1216.1.0	443200	leading		238.121		95.4904
YLR152C	12	445344	37.5614	442684	445344	ARS1216.2.0	444400	leading		468.734		112.703
YLR163W-A	12	492313	44.5585	492313	493053	ARS1217.1.0	513600	leading		408.62		146.827
YLR165C	12	495792	44.9568	494212	495792	ARS1217.1.0	513600	leading		124.975		114.328
YLR167W	12	498364	39.7295	498364	499684	ARS1217.1.0	513600	leading		1219.63		ND
YLR166C	12	498600	39.1717	495240	498600	ARS1217.1.0	513600	leading		91.0832		311.385
YLR174W	12	504036	37.3523	504036	505956	ARS1217.1.0	513600	leading		240.232		186.352
YLR182W	12	517396	36.8795	517396	520656	ARS1217.3.2	518000	lagging	ND	433.807	ND	ND
YLR181C	12	518256	35.0677	516396	518256	ARS1217.3.2	518000	leading		829.421	450.821	750.143
YLR184W	12	521607	35.6503	521607	522587	ARS1217.4.0	520800	lagging	188.943	173.111	1285.69	694.14
YLR185W	12	522092	35.3946	522092	523532	ARS1217.4.0	520800	lagging	527.73	100.227	705.576	2284.84
YLR183C	12	522656	35.5251	520256	522656	ARS1217.4.0	520800	lagging	297.673	92.6413	392.301	846.933
YLR186W	12	523076	36.0714	523076	524636	ARS1217.4.0	520800	lagging	226.504	87.7488	98.9887	347.194
YLR187W	12	524172	39.1823	524172	528132	ARS1217.4.0	520800	lagging	346.26	833.158	291.718	112.034
YLR188W	12	527732	42.096	527732	530852	ARS1217.4.0	520800	lagging	671.403	296.354	101.722	193.98
YLR222C	12	582304	41.0658	579064	582304	ARS1218.0.0	602800	leading		775.633		853.128
YLR234W	12	609236	35.7423	609236	612396	ARS1218.1.0	609200	lagging	288.633	179.985	125.032	502.497
YLR233C	12	610072	35.0864	607012	610072	ARS1218.1.0	609200	leading		77.9708		400.215
YLR237W	12	611756	37.788	611756	614516	ARS1218.1.1	610800	lagging	153.326	106.418	123.062	1263.53
YLR235C	12	612431	38.4445	611411	612431	ARS1218.1.1	610800	lagging	680.298	206.385	213.771	280.401
YLR236C	12	612618	38.4445	611658	612618	ARS1218.1.1	610800	lagging	460.225	458.088	136.945	704.969
YLR238W	12	614116	43.2475	614116	616476	ARS1218.1.1	610800	lagging	129.097	81.6747	172.282	334.552
YLR243W	12	623556	44.8625	623556	625296	ARS1218.1.1	610800	lagging	181.881	112.298		196.113
YLR257W	12	658116	40.7651	658116	660036	ARS1220.0.0	659600	leading		91.5437	188.131	254.992
YLR291C	12	720024	42.2259	718024	720024	ARS1222.0.0	725600	leading		184.037		155.738
YLR292C	12	720936	41.4026	719456	720936	ARS1222.0.0	725600	leading		622.504		458.679
YLR293C	12	722008	37.9419	720408	722008	ARS1222.0.0	725600	leading		1332.9		774.766
YLR296W	12	722479	36.1574	722479	723439	ARS1222.0.0	725600	leading		1584.64	577.194	133.741
YLR294C	12	722531	36.1574	721571	722531	ARS1222.0.0	725600	leading		ND		248.427
YLR300W	12	728356	42.8816	728356	730736	ARS1222.0.0	725600	lagging	212.332	286.319	107.928	162.088
YLR299C-A	12	728504	43.1415	727784	728504	ARS1222.0.0	725600	lagging	703.966	546.47	195.022	139.91
YLR301W	12	730326	35.3846	730326	731686	ARS1222.2.0	732000	leading		104.242	146.6	187.525
YLR303W	12	731996	38.7199	731996	734116	ARS1222.2.0	732000	lagging	555.969	583.285		454.306
YLR302C	12	733054	35.097	732054	733054	ARS1222.2.0	732000	lagging	550.891	582.314		450.27
YLR308W	12	747438	41.951	747438	748998	ARS1223.2.0	746000	lagging	118.434	113.699	298.051	477.332
YLR307C-A	12	748104	42.3627	746464	748104	ARS1223.2.0	746000	lagging	171.258	511.778	285.215	730.091
YLR309C	12	752304	40.0043	748704	752304	ARS1223.2.0	746000	lagging	148.823	371.352	108.375	533.401
YLR310C	12	757656	44.0891	751856	757656	ARS1223.2.0	746000	lagging	332.56	342.71	109.118	246.595
YLR311C	12	758113	44.7474	757133	758113	ARS1223.2.0	746000	lagging	1345.99	103.377	ND	ND
YLR322W	12	777127	41.694	777127	778067	ARS1226.0.0	781200	leading		ND		105.882
YLR321C	12	778398	43.3063	776098	778398	ARS1226.0.0	781200	leading		139.266		122.03
YLR324W	12	778650	42.0948	778650	781030	ARS1226.0.0	781200	leading		282.63		355.799
YLR323C	12	779574	39.1687	777794	779574	ARS1226.0.0	781200	leading		147.218		96.8511
YLR326W	12	781466	43.1533	781466	783146	ARS1226.0.1	782800	leading		202.575	328.081	322.404
YLR325C	12	781918	42.8634	780578	781918	ARS1226.0.0	781200	lagging	169.914	ND	94.771	53.8193
YLR328W	12	784210	39.9217	784210	786390	ARS1226.1.0	784400	lagging	268.878	348.328	144.946	203.021
YLR327C	12	783982	40.4356	782822	783982	ARS1226.1.0	784400	leading		119.287		285.263
YLR329W	12	785941	37.2142	785941	787461	ARS1226.2.0	786800	leading		162.971		329.383
YLR330W	12	787122	37.9729	787122	789962	ARS1226.2.0	786800	lagging	542.198	530.122	199.449	775.128
YLR332W	12	789738	38.7232	789738	792098	ARS1226.3.0	791600	leading		249.209		211.825
YLR331C	12	791545	42.4649	790545	791545	ARS1226.3.0	791600	leading		115.944		146.731
YLR335W	12	796834	41.3896	796834	799854	ARS1226.7.0	798000	lagging	432.364	177.7	287.295	109.815
YLR333C	12	796886	41.3896	795286	796886	ARS1226.6.0	795600	lagging	78.2608	150.128	302.183	191.3
YLR334C	12	797577	41.338	796557	797577	ARS1226.7.0	798000	leading		71.4171	534.873	168.313
YLR344W	12	818762	43.0301	818762	820542	ARS1227.0.0	818800	lagging	174.412	325.228	285.491	129.953
YLR345W	12	819914	44.9422	819914	822274	ARS1227.0.1	821600	leading		384.749	442.506	401.981
YLR346C	12	823230	44.6587	821930	823230	ARS1227.1.0	823200	leading		422.085		726.561
YLR383W	12	884698	42.0503	884698	888898	ARS1227.5.2.0	884800	lagging	546.781	539.325		61.6153
YLR382C	12	885526	42.073	881766	885526	ARS1227.5.2.0	884800	leading		265.188	102.336	94.7648
YLR386W	12	893026	44.8998	893026	896566	ARS1227.5.6.2	894400	lagging	250.722	923.196	328.534	206.178
YLR400W	12	921562	43.9383	921562	922662	ARS1229.0.3	922400	leading		273.61		289.129
YLR399C	12	922142	41.9433	919062	922142	ARS1229.0.3	922400	leading		674.988		257.77
YLR402W	12	924063	44.4875	924063	925203	ARS1229.1.0	924800	leading		233.194		804.024
YLR404W	12	928219	43.3795	928219	929879	ARS1229.3.1	928800	lagging	1015.27	2993.68		361.287
YLR411W	12	946750	44.4244	946750	948110	ARS1231.0.0	948400	leading		176.077		59.6161
YLR412W	12	947843	44.2398	947843	950403	ARS1231.0.0	948400	lagging	582.551	141.485	288.771	162.906
YLR432W	12	1001899	42.557	1001899	1004539	ARS1232.1.1	1002400	lagging	295.627	195.202	ND	485.315
[truncated: 4,194 more rows]
